# Supplementary material for: Genome-Wide Identification of LRR-RLK Family in Saccharum and Expression Analysis in Response to Biotic and Abiotic Stress
Source: MDPI journal article supplement (doi:10.3390/cimb43030116), 2021-10-18
Supplement: s1 [file s1]

**Additional file 3:** The 2000 bp nucleotide sequences upstream of the translation start site of 437 *SsLRR-RLKs* genes

>SsLRR-RLK327

GACGTCCTCTCATCTGGGTACAATCGTAGTATTGTTTATTTACAAACTCACACCAACCGTACACACGCACACCAAAACCTACAA  
CTACACTCAGATCATATCGTGTCTTCGTGAAATCACCAGTCCATCCATGGCAATTGGCGACGGGCGCGTCTCAITCCCTTTG  
TGACTCCACGATGAGAGGCAAAACGAAATTTATTTGGGGACTAACCCCGGTGAGAGGCGCGAGTAGGATCCAGAGTAGGATC  
CAGGAATCGAACTCGCGTCGACTGCCTGCACACCCGAGAGCTAGCCACCCGAGCTCTGCTCGGTTCTTAGACTTCCCCATT  
CACGGGTGAATGAGTATAGCCAATTCCTTACAACCTCCAAAGCGCTTAAATCCACTCCTTACAACCCCACTATAGGATTGTTGT  
GGCGGAGCTAGCAGAGCCCATGTAGCATAGTGTGTACCGTTCTATGGCGGAGCTGTAGAGCTGGAGCCAATAGAATTGA  
TGGCAAATGGCCTAAAATATATTTATTCTGGTATTGTAAACAATAGTGCAATATGTTTTTTTGGCAAATAGTTATTTTCATCC  
CTAAACTATTGCCCGAGGCTCAGTTTGGTCCCAAACTTTTAAATGTCCACTTTAGTCTTAAACAATGGATTGCAACTCA  
ATCTCGTTACCCCCCTCATGTCTCGCCATGTGGCTAGCACTGCACACGAAATGTTGCTCCTACCCCTCGCTTTTCCCTTTAGT  
TTAGGGACCAATCTGAGCCGAGACAATAGTTTAGGGACGAAAATAGCTATTTTACCTATATTTTATATGTTAAAGTTTAAAA  
TATTTAAATTATAGGATAAACGTTGAACGTTAGACATACATACAAGGGAGAAAGAAGAAGAGAAGGATTCTATTCTGTACATT  
TACATTACCCGCAACGTTGCACTGGTCCCCGATTAATCTACTACTCCTCTGAACAGGGTACTTAGACCACCTGCACCGGTTG  
AACTAAATCCCCTCTACGTCTCCACATCAGTGGTTACCGTATCAGATATGAAAAATAAGGCTGTGTTTAGGTGGGGTTG  
TAAATTTTTAGAAGCACAGTAACCTTTTCTGTTTTTATTTGGTAATTAGTGTCTAATCATGGGCTAATTAGGTTGCAAGATT  
GTCTCGTAATTTACAACCAAACTGTGTAATTAGTTATTTTTTATCTATATTTAATACTCCATGCATGTGTCTAAAAAATCGATAT  
AACAGGAAATCTTATAAAATCTTTGAACTTTGAAACATCTAAACACAGCCTGAGCTGCAGCGGTGTGCGCTATGCACGCGC  
TATCAAGCATCCACCGCTATTTCTGGCGCATGGAGGATGTTACTTTGAGCAGCACTTACGTGAGAGAGAGGAGAGGTTGAG  
AGCGGGGGGCTCCACTTGTTTTCTCGCAACAAAAAATGTTATAACATTGTATCATTAATTCGTTTCAATAAATACTTTAAAT  
AAGATGTCACATGTATATATTTAGATAAAGTAACAAGTGAGTCCACAGTGAATAGAGGATGATATAGATGATGGATGGATGC  
GAGAATCTATATATTTATGATGAATAGGATGTAATATCTTTTAAAGAATGAATATAGAGATGCATGTAGTGGCGGATTAATCT  
AAGCAGATACAGTTTCTGATCCGTCATTTTACCAGCAGCTAGTACACATCGCCAGCCTATTTTGTACGTATCCTCGTATGATA  
CCACAGACAGGCACATGACACATGCCTCGTGTACCATAGTAGCTCATCATGCATCCACGCTGCCACTAACAATCCCCATAA  
ACCCCTCCCTTTTACCTTTTACTATCCATCCAAACGCCTTTCCAAGCCTCTACAGCTTTTGAATCCCCACTTTTACCA  
CAACACCCCTATAAACCTCCGAATTCCCAACCCCAACATTGCCCAAGAACTCACTCGGTCACTCTCACTCTGCCTCCG  
CCA

>SsLRR-RLK336

AGTAGTTTCTACGAAAATTAAGTTTCTAGATATGCTCTAATGTTATTTTTGACATTGAATTTGGTAATGATATATATCTGTCC  
TCCTCCTCTGTCTCTTTTGGGAGGAAAATCCTCCCATCGGTATAGTTTGCACCTTTTTTAGATTAAGGAATAAAGAAGTATTCC  
AGACTTTTCCATTCTTTTTTTTTGACGCTCTCGTCTGGGTACCGTCTGATGATTTGTTTATTTACAAACTCACACCAACCGT  
ACACACGGACCCACACCGCGTACACAAACAACTACAACCTCACTCATATTATATCATGTCTCTCGTAAATACCCGG  
TGCCATCCATGGCATCGGCGATGGGCGCTCTCATTTCCCTTTGTGACTCCACGCGTGAGAGGCAAAATTTATTGGGGA  
CTAACCCCGGTGAGAGACGCGAGTAGGATCCAGGAATCGAACTCGCGTCTGGCTGCACACCCGAGAGCTAGCCAC  
ATGAGCTCTGCTCGGTTCTCAGACTTCCCCATTACCGGTGAACGAGTATAGCCAATTCCTTACAACCTCCAAAGCGCTTAAAT  
CCACTCCTTACAACCCCATATAGGATTGTTGTGGCTGAGCTGGCAGAGCCTCATGTAGCATAGTGTGTACCGGTTCTATGCT  
GGAGCTGTGAGAGCTGGAGCCAATAGAATCGATGGCAAATGGCCTAAAATTAATTTATTCTGGTATTGTAAACAATAGTGC  
AATATATTTTTTTGGGCAAAATAGTTATTTTCATCCCTAAACTATTGCCGAGGCTCAGTTTGGTCCCGAACTTTTAAATTTGTC  
CACTTTAGTCTCTTAAACAATGGATTGCAACTCAATCTCGTCCACCCCTTCATGTCTCGCCATGTGGCTAGCACTGCACACG  
AAATGTTGCTCTTACCCCTCGCTTTTCTTTAGTTTAGGGACCAATCTAAACCTCAGTCAATAGTTTAGGGACGAAATAGC  
TATTTATCTATATTTTATATGTTAAAGTTTAAATATTTAAATATAGGATAAACGTTGAACGTTAGACATACATAAAGGGAG  
CAAGAAGAGAAGAGAGGATTCTATTCTTACATTACATTCACCGCAACATTCCACTGGTCTACATGGACCGCAATAATCTACT  
ACTCTCCTGAACAGGTTATTAGATTATCTGCACTCATAGACCTCTATATTCATTCTCTAAAAGAAATTTCCATCTTAGTCAT  
CATAAAATATACAGTTTCTCCGCATCCATCCATCCTCTATATCATCCTCTATCCATTGTAGGGTCCACTTGTCACTTTATCTAAAT  
ATATTATATGAGATCTAGTTTGAAGAATTTATGAAACAAATTAATGGTGCAATCGGAATTAATTAATTTATAGTTTGT  
GATTATAACATTTTTTAGATAAATGAACTGTGGGGTCCGCCACTGAGATTCCCTCGTGGCACGCACGCTCTCTGCTTTGTC  
GCTCCGACCGGTACCGGTAAGGCTCAGTACTCTTCAAAATTTGCGGGAGAAAGAGGCATACAGGCGGTTTACCGTCCCG  
AGTGCAGCTCATTTCAAACGCTATAAGGGACGTGGAGCTATACCGGTGGCCTTTACAGGCACCGGTGCAGAAGGTCTTAAGC  
AGATACAGTTTCTGATCCGTCATTTTACCAGCAGCTAGTACACATCGCCAGCCTATTTGTACGTATCCTCGTATGATACAC  
AGCAGGACATGACACATGCCTCGTGTACCATAGTAGCTCAACATGCATCCACGCTGCCACTAACAATCCCCATAAAC  
CCCTCCCTTTTCACTTTTACTATCCATCCAAACGCCTTTCCAAGCCTCTACAGCTTTTGAATCCCCACTTTTACCACAA  
ACACCCCTATAAACCTCTGAATCCCACACCCCAACATTGCCCAAGAACTCACTCGGTCACTCTCACTCTGCCTCCGCG

>SsLRR-RLK405

GTTATCTTCTTTCTATATTTCTATTCCTCTCTACTATGCAATCTCAATTGCTATTTCGATGATTTTTTTTTGTTTTCTATTCTCTTATTC  
CAAATAGGCTCTAAGATATTTTTTCCGTCTGTTTCTATTCTTGTGTATCTCGCACCATGACACACAAGCACACTTAGCGACCT  
GAGGATGTCTATAAGGGTGAGATGCAACTATAATAGAAATCTCGTAGGCGTCATGCAGTATACTTTTTTTGATAGGATCAT  
GTAGTATATAGCTTAAAGGTATATTGGATCTCCTAGAAATTACCAAGATGAAATGCAAGGATGAGAATAAAGTCCAAACAAG  
TGGATTCCATTCTACATGGGATTTTGTAAATCAACCATCAAATTCACAATCCAACCATCCGTAGCAATGCTATGAAGA  
GATAACACATCTAACCAACTCGGATCTCTAATAATACTATAGAACACAACTAGCTTCTTTTTTTCTAGATCTAGATTCTACG  
ATCACCGTCTAAAATCCCAATTTTTAGAATCATAGGGAGCGTAAATCCATATTAGAAAGCATTTAGTTTCACAGCCAGAGGTC  
AATGCATCATGCCGAAGTTTCGTGCCTAAAGTTAGTTGCGTGTTTTGGTTTTGCTGCTCGAGTTGCGGCACCGCAACCCCTTG  
TCATCGCGCGCTAGTTTCATTTTTACACACAGTTTATCAAATATCTAGGGGACAAATTGTCCACCGCACTTTTGGCGCGGCC  
CTCGCAGAGAATGCATAGGTGGACACCTAATAGGGCCTTAACCTTTTATATTGAGCCACAATACATAGAATCTATATTTTGGGA  
CATTTCTACTTGGGTAGAATCATAGAAATATTTAGGAGATCTGTGAGAAGAGATGAGAGGGACGAGAGAGGAAGACGGCAC  
AACACATAGGTCCAATGTGTCTGGCTCTAGTCATCTGATCTCTAGATAACTGAGATTAAAAATTTTGGGACTTTGAAATGT  
ATTTGAAAATTTGAGACTCGATACAGTTAGCAGTTACATAAATTCAGGAAATTATATTACGATGAATCCTTGAATTTCAA  
CTATGCCTGAAATTTAGGCTTAGGCTATCCGACCCGCGGAGCGCAAAATCCATCGGAACGCTAGGGATACCGGTTCAATTCG  
TGCACCGGGAACGGCAAGCAACGCTATCGCTCAGTTCGTCAGTGAACAGCGCAAGTTCCGCGTCTCTCTCTCTCTC  
GCTATCCTCTCCAGGCGGGCTCCGCTCCGCGGAGGTCGAATCCGGGCGGCGGACGAGCTCCGGACGGGCGCGCGGACG  
GCGGGCGAGGTCCGCGCCGGCGAGCTCCGCGCGGACGCGAGTGCCTGGGCGACCTCCGCGCTGGCCACCTCCATGGCCG  
GACGGGCGTGGCGACGGCGGGCGAGGTCGCGCGCGGCGAGCTCCGCGCGGGCGGAGGGGCGGTGGGCGACCTCCGCGCT  
GGCCACCTCCATGGCGGACGGGCGTGGCGGCGGCGGAGGTCGCGCGCGGCGAGCTCCGCGCGGCGGAGCTCCGCGGCGG  
TGGGCGACCTCCGCGCTGGCCACCTCCATGGCGGCGGGCGAGCTGCGCGCGGGAAGGAGTGGAGGGAGGGAGGGGAGC  
CGCGCGCTGGGAGGCGCGCGGCTGCTGCCGCGCGAGCTCCGCGCGGCCACCTCCATGGCCGTCCGGAGAGCGAGGAGG  
AGAGGAGGAGAGGATGGCGGTCCGGATAGCGTTGTGACGCGCGAGCTCCCTCGCTGTACGCGGACGCAAGCGGAG  
CCCACCTCTTTTAGCGTGGGCGATGGAGATGGGGTGGTGCATAGCCTTAAACCCCGTCACAACCTCGCATCCTCGCGGTCA  
CAACACAAAAAGGGCGCACGAAACCTGCGGAATCAGGTCTTCCCCCTCACTCTACATCACTCTCTCCGGTCTCCTCTCTCA

>SsLRR-RLK415

>SsLRR-RLK436

>SsLRR-RLK176

>SsLRR-RLK162

GCCTACAAAGGCTCGTGGGTCTCCGCGGCTTCACTCAGCGGCCCGGCATTGACTATGCTGAGACGTTACGTCCCGTGGTG  
AAGCCAGCTACAGTCCGCACCGTCTCTCCCTGGCTCTCGAGCGCTCTGGCCTGTGCATCAGCTGGATGTCAAGAATGCCT  
TCCTTCATGGCACTCTGACTGAGACGGTCTACTGCAGTCAGCCGCAAGGTTTTGTGGATGCTTCTCGTCTGACTTCGTCTGCC

GGCTCAACAAATCTCTCTACGGGCTCAAGCAGGCACCCGGGCTTGGTACTCTCGCTTCGCTACCTTCCTGCGAGACTCTTGGG  
TTCAGGCGAGGCCAAGTCTGACACCTCCCTGTTCATATACCCTATGGGGGTGACACTGCTTACCTGCTCCTCTATGTGGATGA  
CATTTGTTCTCACCGCTCCAGCGAGTCTCTGCTCCACCGCATCAITGGCTCTCTCCAGAAGGAATTTGTCTATGAAGGATCTG  
GGGTGCTCCACCCTTCTCTGGCGTCACTGTTGAGCCCCGACCTTTAGGCTTGTCTCCACCAGCGGCAGTTCCTTGTGA  
CATTCTGGAGCGAGCCGGGATGACCGCTGCCAGTCTGCTCTACACCGGTGGACACCCAGGGCAAGCTGTGAGAGGCTGG  
GGGTCGATGCTTGGGCCAGCAGACTCCACCGCTACCGGAGTCTTGCAGGCGCGCTTCAGTACCTCACTTTCACACGGCC  
GGACATCACTTATGCCGTCCAGCAGTCTGCCCTTACATGCATGCTCCGCGGGAGCCTACCTGGCTGCTATGAAGCGGCTT  
CTCTGGTACCTCCGTGGCACCCTTGGCTACGGGCTGCTCCTCGGCCGGTCTTCCACTGCCGAGCTGGTGTCTACACCGATG  
CTGACTGGGCGGGATGCCCGGACACCCGAGGTCCACCTCCGGCTACGCGGTCTTCTCGGCGGCAACCTGGTCTCTTGGT  
CGTCCAAGCGCCAGCCCGTGGTTCCTCCGCTCCAGTGCCGAGGCAGAGTACCGTGCCGTGGCCAACGGCGTGGCTGAGGCC  
GCCTGGCTCCGCCAGCTCCTGGCTGAGCTTACCGGCCACTCGCCAGGAGCACGCTCGTCTACTGCGACAACGTCAGTGCG  
GTCTACCTCTCCACCAACCCCGTGACGACCCAGAGGACCAAGCATGTGGAGATCGATCTACACTTCGTCCGCGACCCGGGTG  
GCCATCGGCGACGTCCGGGTCTGACAGTCCCGACCACTCCAGTTTGGGATATCTTACCAAAGGCCCTCCCTTCCTCGA  
CCTTCTCGAGTTTCGCTCCAGCCTCAACGTCTCCAGTGGCTAGTTTGGCTGCGGGGGGTCTGTGTGTGTGTGCTTACTT  
GTTTTCTTCTTGTTCAGCCTTGAATCCGCTGCGCCGGTAGTTACAGACTGCGGGGGGGTGTGGAGTGTGTTGTATTAAGC  
CCATGAGGCTAGGCCCATGTGGCCCATGTATGGTACCTATATAGCTACCTTCTAGGGTTAGCCCAATTAATGAATCACACAT  
TAGACCTATGAGTACCTAGGTTATCTCTACTGACCACATAAGCTTGTAGACATTTGGCTCCTGTCTGCTCAAGTCAAATG  
TTTGAATTAGAAACTCTAGAAAAAATCTGCGCAATAGATAATAATTATACCAATGGAATGGTCAGACCACCTGCTTGACCC  
CACTAATTAGTGCCCTTGTATATTCTCACAAAAGAGGGGCGATAAAATCACTTCTATTGAGCACTGCTCATTTTCCTTGGTTGAA  
ATATATATATCTACAATTGGCGAAATATTGTCTGCCATGACCTGTGTATTAAAGTGCTACAGATTTCCAGATTGCATGTGAGGCAC  
TAATAGATTCAATAAGAAGTATTTCACTTTTGAAGACTTGAGTCTACCTTGGGACCCAGAAATAAGACTGTTTTGTCTGC  
AGTCGAAGCACTGTTGAAGTGAAG

>SsLRR-RLK316

ACTCCGAACCATGACCGTGCCAAACGGGATAGGGCGTTCGGGGTCAGCCATCCAGGAAAAAGGCGGGAAAGCGACGT  
TGGCATGCAGCGACCCCTATCTGGCGTGCCAACTGTGCGGTGTTTCGGACCCGAGGGGGTCTAGACCAACGAGTAAATGCT  
GCGTGTCCCTTTCTGGATGGTGATGCAAGGAGAACACACGGGGGTTATCCTGGTTCGGGCAAGAGAAGGCCCTACGTCC  
AGCGGGGGAGGGGAGATTTGTATTTCTTGCACCGAGGTGCTTGGCTAGGGGTACAAAGCTTGCAGAGAGGGCGGTGAG  
CCGAGTCTCAAAGAGGAGAAACCGAATAACAGCAGATTGCTTGAGATGTTGATCGCTATCTTGTGTGTGTGCTTCTGCTCG  
GTCGTCTTCTCCAGAGCCTGGCCTACCTTTTATAGGACGAGAGGAGGCCAGGGCAACGGATGCCTTGAGATGATGTTTTG  
TCGATCACTGTGAGGTGACTGTAGCGACGTGCCCTAGAAATGGGAGGCCATCCCTGGACACCATGGCGTTATAGAGGACG  
GGACACCGAAATGACCCGGAGCGCCATGCCATGCCCTCTTCTTCCCTGTTGAGTTGTGCCGACGCTGCAGCGCCGGTGC  
AGGCCGGGTGCGAGGCCGATTGGATAAGTCCGAATCCCTTGGATCGCGGTGTACGGGCCCTTGTGCTATCCTCCCTCGAGGGTA  
ACTAGTGACGTACAGTGTGCGGTAAAGTGGGTACAGTGTATTTTACCTCCCATCACGGGATGGACGGTAAACAGTGA  
GGACTGACACTGGTATTGTTCCACGTCGACCCCTGGTTGCGGCCATGCCGGTAGGTGGTAGTAGGTAATTGCATTAATGCTA  
TGACTTTTTCGGGGGTAGGTGGAGAAAGAGGGGATCGAGCGCCTCGACCCGGGCTCACACGAGACGGAGTTCCGGTCA  
GGCGTTTTGTGCTGCGGGACGGGGCGCGGTGCGAGACCTCCCGTTCGAGGGGGTCTCATAAGTTCGGAGACGGGATGCGGT  
CGAGGCTTCCGTGAGCCGGCCTCATACGAGGCGGACCTGACGACAGTCTTGAAGTGGGCTGTGTTTGTGATGGCCTAGT  
CGTTTAGTTTATTATCGTGAATGTGGGTACCCCTACTACTGTTGACCGACAATTTATGTCTTCCATTTCTCTCTGTTGCT  
CTCCTCTTACACGCTTTGTTCATTGATGCAGCAGCCTAGCAGCAATTTCACTTCAAAAGGGCTTCTTTTTATTGAAGTAAA  
CGGAATCAGAGTATTCAGCGGCGCATCTGTTCCTGAAACAAAAAATCATGATGATAGATTCAGAAATAATGAATCTATTAG  
CTTTTGTGTTACTTCTGTGGGGATGTCAACAGCTTTCTCTTCCCTCGCTATCGAATCCCAAGGTATGGCTATGGCATTAAACA  
TTTTTCGCGAAATAAGATGTTCTTGATTAGCTGGCATTAGATAAGCAATTTATATATTAAACTGAAACTTGTATTGATGAC  
AAGCTTTCCATCAGAGGCATACAAATTATTGTCTATGGACTAGATTATCTCTACTGACCACAGAAGTGGATCTTAGACATTTGG  
CTCCCTGTCCATGACACCGGTCAAATGTTGAATTAGAACTGAGAAAAAATCTGCGCAATAGATAATAATGCATACCAATT  
GAATGGTCAGGTCACCTGTGACCCCACTAATTAGTGCCCTTGAATATTCTCACAAAGAGGGGCATAAAGCACTTCTATT  
GAGTACTGTTCATTTTCTTTGGTTGAAATATATATATCTCCAATTGTGCAAAATATTGTCTGCCATGCCCTGTGTATTAAAGTGT  
ACAGGTTCCATATTGCATGTGAGGCACTGAATAGATTCAATAAGAAGTATTTCACTTTTGAAGACTTGAATCTACCTTGGGC  
CCGAGAAATAAGACTGTTTTGTCTG

>SsLRR-RLK317

TCACTCAGCTCAGTGCTGAAGCTTCTCTCCGCTATCCTCTTTCCATGTCTCCGAACAACTGAGTGTTCGTTAAAACTGCTGAG  
GTTTCAGAGAAGTTCTAAGAAGCTGGGTGACCCGAGGCTGTGATGCTTCTTCCCCCTCCTCTTGGTAAGTCTTGGCCGGTCT  
TCCTTGATGATGATGCGCCGTGCTGCTCTTTGAGTATGCTTTTGCTTGTGACTTGATTGCTAGTCTTGTGCGGGTCTCCTTG  
CTGCACTGCTCAGTTGCTCAGATACAAAGTATTGCCTGTTGACTTTGTGCTGCTGCTCTTCTCGAGCATCTGTTGTCTTGA  
GATTGCTTGTCTCTCCATTAGAGCGGTTTCCCTGTCTCAGGGCTGTAGGCGCCTCTGCTTCTCTCTTGTGCTTTGTGGCAA  
AACAAATGGAAGGATAGTAAAGCTTCGTTTCAGCCCAAACTACCAAAACAGGAAAAACACTGCCTCTAGCGACCCGGAAGCT  
TCCACCTGCATAGCAAAATGGACAGGAAATGGGTGAGAAAGTTCACCTGCATGCATATCATGATCCCTGATGAACAG  
AGTAGGAGCTAGGAAGTGACCTTTGAGAAGTTGCTATGTAAGCGCCAAAAAAGGAGAGACAAAAATCATTTTGTCAAAAAAC  
AAGGAGACAAAAACATGCTTACTGCTCAACGCATCTTGATGCTGGCAGAGCTGGAAGCGATTCTGCTTTGCTGTACATTCCA  
CTACGTGATTAATAATAAAAGGGGGGCTTTTATCATGTATGAGAATATAGGGGCTGGCTGTAGTAACTGACAAGGTATGTAG  
GGTCATTAGGTCTCATTAGATACAGATAATCTCACTGCTCTGGATTCTGGACTTACATGTAAATGTCTATGCCGGATGAACCT  
TTCTTTCTGAGAAATGCAACAGAGGAACTTCTGGGGACTGCTGCATACTAGTGAGCTACTGAAGTTTAGTTACCACACAGA  
GACTCAATTCACACATACAAATCTTTTTCCACTCTCAAATATGATACACCTTTTTTTAAACACAAGAAGTCAACTAACTTTGAC  
TGCTGTAGATATAATCACAAACAACTGATGTAGATTCTTGGCATGTTGTTATACCAATTCCATCTTGCTTCCAGAATTCCAGTAC  
TGAACCATGCCAGATTTTCTCTCCGAGTATTTCTGTCTTCCATTCTTCTGTTTGTCTCTCTTACACGCTTTGTTCCATTG  
ATGCAGCAGCCTAGCAGCAATTTCACTTCAAAAGGGCTTCTTTTTATTGAAGTAAACGGAATCAGAGTATTCAGCGCGCA  
TCTGTTCTGAAACAAAAAATCATGATGATAGATTGAGAAATAATGAATCTATTAGCTTTTGTGTTACTTCTGTGGGGATG  
TCAACAGCTTCTCTTCCCTCGCTATCGAATCCCAAGGTATGGCTATGGCATTAAACATTTTCGCGCAAAATAAGATGTTCTTGA  
TTAGCTGGCATTAGATAAGCAATTTATATATTAAACTGAACTTTGATTTGAGTGACAAGCTTTCCATCAGAGGCATACAAA  
TTATTTGCTATGGACTAGATTATCTCTACTGACCACAGAAGTGGATCTTAGACATTTGGCTCCCTGTCCATGTCACCGGTCAAA  
TGTTTGAATTAGAACTCTAGAAAAAATCTGCGCAATAGATAAATATGCATACCAATGGAATGGTCAGACCACCTGCTTGACC  
CCACTAATTAGTGCCCTTGAATATTCTCACAAAGAGGGGCATAAAGCACTTCTATTGAGTACTGTTCATTTTCTTTGGTTGA  
AATATATATATCTCCAATTGTGCAAAATATTGTCTGCCATGCCCTGTGTATTAAAGTGCTACAGGTTCCATATTGCATGTGAGGCA  
CTGAATAGATTCAATAAGAAGTATTTCACTTTTGAAGACTTGAATCTACCTTGGGCCCCAGAAATAAGACTGTTTTGTCTGC  
AGT

>SsLRR-RLK329

GGGAGAGAAGCATACACCTTGTTCTGTTTGGAGCATATCAGCAGAATCAGCAGCCATTCAGCAGTGTTTTTCTCTCACAAACAA  
CCAGCGAACAGTACTTTTCAGCCACAACAAACCGAAACGAACAGGCTGATAGTCGTCTTAAACAATTTTATAGGCTCAGA  
CCCCAATCTTATTATTCAGCACCCTATGCTCACCTTCCCTCTTCTTTTCTACTCTTATCAACTTGCTCCACTCCTACCAAAAA  
ACTTATGCCCAAAAGACTGTAGGACCATGTATGAGATTAGAAGATCTACTAGTGGGATAATTAGTAGGATAAAGATCTCCG  
TGCAGATATGGGTTTGTGAGCCGGTATTCACAGCCCTAGGATTACAAGTGGAGAATCTGTACGGTAGCCAATCCGAGCCGTT

CACGCGGATCCAATGAGATGGTTAGAATTACCTCCTCTTGCTTCGGAGCGCTCCGATAAATTTGACCATCCAATTGTCTCC  
TCATCTCAGTCTCAGCTCAGGGCTGAAGCTTCTCTCCACTATCCTCTTTCCATGGGGGTGTTTACTTCTCTCAAAATTTCAAAA  
ATTTTACAAGATTCCCCGTCACATCGAATCTTTGGATGCATGTATAGAGTATTAATATGTAGGTAAAAAATAACTAATTGCACA  
GTTTGTCTGTAAATGTCGAGACGAATCTTTAAGTCTAGTTAGTCCATGATTGGATAAATTTATCAAATAACAACGAAAAAGT  
GCTACAGGAACTTTACACCAACTTTTACACCATCTAAACACTACCCATGTCTCCGAACAACTGAGTGTTCGTTATAACTCCTG  
AGGTTACAGAAAGTTCTAAGAAGCTGAGTGCACCACAGGACTGATGCTTCTCCCACTTCTCTTGGTAAGTCTTGGCCGGT  
CTTCTTGTGCTGCTGCAAGCTCGTCGTCGTCCTTTTGGATGACATCTGTTTGTCTTGAATGCTAGTCTTGGCCGGTCTT  
CCTTGTGCTGCTGCTCACTTGTCTAGCTAAGTACTGCCTGTTTGAATCTGCTGCTGCTTCTTCTTCCGAGTATCTGTTTGT  
TGACTGGATTGCTTCTCTCCATTAGAGCGGTTTCCCCTGCTTCAGGGCTTCTCTGCTTCAGGGCTTGTAGGGCGCTCTGCT  
TCTTCTTTGCTTTTGTGGCAAAACAAATGGAAGGATAGTAAAGCTTCGTTTCAGCCCAAACTACCAAAACAGGAAAAAC  
ACTGCTCTAGCGACCGGAAGCTTCCACCTGCATAGCAAAATGGACAGGAAATGGGTGAGAAAGTTCACCTGCATGCATATC  
ATGATCCCTAGTCTTGAACAGAGTAGGAGCTAGGAAGTGACCTTTGAGAAGTTGCTATGTAAGCGCCAAAAAAGGAGAG  
ACAAAAACATTTGTCAAAAAACAAGGAGACAAAAACATGCTTACTGCTCAACGCATCTTGATGCTGGCACAGCTGGAAG  
CGATTCTGCTTTGCTGTACATTCCACTACCTGATTAATAAATAAAAAAGGGGGGCTTTATCATGTATGAGAATATAGGGCTGG  
CTGTAGTAACGTGACAAGGTATGTAGGGTCAATTAGGTCTCATTAGATACAGATAATCTCACTGGCTCTGGATTCTGGACTTACAT  
GTAAATGTCTATGCCGGATGAACCTTTTCTTCTGAGAAATGCAACAGAGGAACTTCTGGGGACTGCTGCATACCTAGTGAGC  
GAATTAAGTTAGTTACACACAGAGACTCATTTACACATGACAAATCTTTTCCACTCTCCAATAGTACACTTTTAAAA  
TACAAGAAGTCAACTAACTTTGACTGCTGTAGATATAATCAACAACAACTGATGTAGATTCTTGGCATGTTGTTATACCATTC  
CATCTTGCTTCCGAATTCCAGTACTGAACCATGCCAGATTTTCTTCTCCGAGTATTCTGTCTTCCATTCTTCTGTTTGTCT  
TCCTCTTACA

>SsLRR-RLK330

AATAACATATAGATTAAATAAAGTGATCAGAGTGATCGTTGATATAAACCCACTAGAATAAATATATACATAATAATAGTCC  
AAAGTACACATTATATCAACAAAATCAAATGTTCCGGTTAATTCCGGTCAGTTCGGTTACCTGAGACCTATGACCGCACTAACCC  
GTACAAAGATTCCGGTTAGTTGGAAGCAGGGACCGAATCTTGACCGAAAAAGTTCCGGTCTCCGGTCTCCGGTTAGTTAGTCCG  
TCTTCGATTAATATGCGCGCAGACAGTGCCGAATGAATTCATCTAGAAGAATTAGCTACACTTTAATTTGCTAATAACTGT  
CTGATAACAACACACGATTAATCTAAGAAGGGATGACAACACGCAATTATCAACCCTAATCCAGTGGAGCTAACAGACATAT  
CCATACACTCAACACTCTTTAGTGTCTATGGGCCATGTCATCATGAAAGGTACATTTTGGCCGAGTAAACAGAAAAACGCGG  
AGACAAAGAACTGACGACCTGTAATTTGTCATCCACGCTCTCGTCTGTTTCAAGTATTAGACTACCCGCACTGGAACCTCTAT  
ATTATCCTCTATACGTCCTAGTCAGCAAGATTCTCTCTCTATCTTAATCTTCCGCACCCATCCATCCTCTATATCATCTCT  
ATCCACTCTATCCACTGTGGGACCCACTGTGCACTTTATCTAAATATATCCATGTGTGATCTAGTTTTGAAGGATTATTTGAGAC  
GAATTAATGGTGCAATCGCAAAATTTAATTTTGATTTTGGTTTGTGAGTTATAGCATTTTCCCTTTGTTTATAGTGGGGCC  
GCCACTATAGAGTATAGAGTAAGCATTTGTAATCTAATAATAGAGTGAGAGAAAGGATAGAGTATCGTTTTAGAGTACCCA  
GTGCATCAGTTTTTACTCTATATTCATACTCTAAAAGTTTAGAGTATCGTTTTAGAAATACCCACTGCGGATAGCCTTAGGGAGT  
GGGTACTCTAAAACGATACTCTACAGCTTTAGAGTATGAATATAGAGTAAAAACTGCTGCACTCGGTACTCTAAAACGATACT  
CTATCTTTTCTACTCTATGGCCCTATTCGGCAGGCTATTTTGGCTTATAAGCCGGCTATGGCTGATTTGCTGTGAGAGAAA  
AATATTGTTCCATGGCTGATAAGCCGTGCTGATAAGCTCAGCCGAACATGGTGTATATTTAGAGTAGTACAATGCTTACTCTAT  
ACTCTATAGTGGTGGACCCCTAGCTAAACAAAGAAAAAATGCTATAACTCACAACCAAAAAATCCAAATTAATTTTC  
GATTACACCACTAAATTCGTCTCAATAAATGCTTCAAACTAACATCACACATGGATATATTAGATAAAGTGCAAGTGAGTCT  
CCACAGTGGATAGAGGATGATATAGAGGATGGATAGGTGCAGAGAATTTAGTATAGAAGAGAGAATTTTGCTAATTAGGAC  
GTATAGAGGATGAATATAGAGGTCCATGAGTGCAGATAGTCTAAATAGCTCAGCAAGGAGCAGCATCAGTAGGTACAGTGGT  
CACAGTTAGACGACTGACGGTCTCCTTAGTTTTGTTCAAGAAACATACTACTACGCACTCAGTTCACTTGTCTCCACTAATT  
TTGATTTTTTAAAACTAAACCTTCTGCCATGGTTGAAATCCACGTCGATATTCTCAGAGTGCAGTCTCATATAAATTGTGTG  
GGACCTGGATGCTGCAGAAAAAATATATGAAAAAGTCAGGGTGGTTTGGGTGAATTTCTTGTTCATTAGCAAGTCAATGG  
GGAGGGGAAGCATGGTCTCTTAAACAATTTTAGGCTCAAACCCCATTCCTATTTATTCAGCACCCATATGCGATGCTCAC  
CTTCCCTCTCTTTTCTACTCTATTCAACTTGCTCCACTCCTAACAAAAATCTTATGCCCAAAAACTGTAGGACCATGTTAT  
G

>SsLRR-RLK246

CACGGACACCCCTTTTTTCCCCCTCCTCTAAGCCCTTGCTAGAGCATGTTTAGTTACACCCCAAAATGCCAAATTTTTCAA  
GATTTCCCGCTCACATCGAATCTTTGGACGCATGCATGAAGCATTAATATAGATAAAAAAATAAACTAATTACACAGTTTAG  
ACGAAATGGACGAGACGAATCTTTTAAACATAATTAGACCATGAGTGGACAATATTTGTCAAATAACAACGAAAAATGCTACA  
GTAGCATTTTGCCAAAAATTTGGCATCCAAACCGGTGCCCTAGTTTCCAAAAATTTTTCCAAAAAGTGCTACAGTAGCCATCA  
CTCGAATCTTTTCGACGCATGATAGAACAATTAATAGTAATAAAGTAATATATAGTTTGTCTTAAATGTCGAGATT  
AATTTTTTGAGCTAGTTAGTCTATAGTTGGATAAATTTTTTACCAAAATGATACAAGAATTTTTCCAAAAAATTTTGCAACTG  
AACACGGCCTAAAAAATATCCCATGGGCTGGCGCGCTGGGAACGACAGCCGGACAGGTGGGTCCAGGCCGCGCTGGC  
TTTTCTGCGGCGCGCGGGGTGTAGACCCGGGCCACGGGACGGGCTTTATCTCCTGTCAAGGGACGGGAGTGGAC  
TTTTGCTGCTTCCAGCTGGCCTTGTCGGGAGGCGGGCCACGCGCAGTGATCCATTCTCCTTTTCCAGCTTCTGCG  
GATCCGGACCTTAACCTTTTGGCGGAAACCTGCTGCACTGTAGCAGCACAGCACTGCTGCTGCTGGGTACGGTACAG  
CTCGGATCTCCGGTTTCTGCTCTTTGGCATAAGCTAATTTCTCACTTAACATGTCGTGGTGAACGAAGCATTAGGTAGCCCG  
ATGATTCTCAATTATAATAGAAAAAACGGGACCTTTTGCAATTTTTTCTCTCCGTAGAAATCCAATCAGGACCGGGTGTG  
TCCGGTCCACGACGGATCAAGCAAAACGTGATGATTTTCCGAATCGATGCGCGCGCTGCAATGGCAGTTGGCCAGTGC  
GTGGGAGCTGTACGAAGCGACACCATCACTCGGAGAATGACGAGACCGGGCGTACCGAGGACCGTGTCCACGAGATCCCC  
GGCGCCCGCAGGCCGCCATGTCAGCAGATGCCCGGGGCCGACCTCCCTGCTCCCTTCCCTCTCGCTCCTCCACTGGC  
AGACTAGCTCCATCAAGTCAACCCACCCACCACTCCCGGAAAGACGCGCCCGCGCCTTCCCGCCGCGCAGCCCTCTCG  
CTTCCACGCGGGCCCCGAGGGTGTCTTAGTCCCGCAGCTCGGTGACGTGCTGTGGAGGTGCGCGGGTGGGTGCTCCCTT  
GCTCCGAGAGGGTAGGCGGTGGTCCCACCGCGGAGTAGAACAAACAATTTAGGTCCGCACACAGCCGCACTTCGTTTCCAGG  
GCGTTGTCTAGTTCCTCTCAAAATCCAAGTTTTTCTACTCTCTATCACATTAATTTTAGTCTGCTGTATGGAATATTAAT  
GTAGGGCCTCGTTTAGATGCTGAAAAAATTTCAACCCGATAAATAGTACCACCTTCGCTTATTTGACAAATATTGTTCAATCG  
TGGACCAGCTAGGCTCAAAAGATTCATCTCGTGATTCCAACATAAAGTGTGAATTAGTTATTTTTTACCTACATTTACTACT  
TCATGCATGGTCCAAAGATTGATGTGATGGAGAGAGTGAAAAAATTTCAACTTTTTGAGTGCATCAAAACGAGGCCTAGGTA  
AAAAATAAATAATTACACAGTTTAGTTGGAATCACGAGATGAATCTTTGAGCCTAGCTGGTCCACGATGAACAATATT  
GTCAATAAAGACGAAAGTGGTACTATTTATCGGGTTGAAATTCAGCTACAGAGAGAATTCGTCCCCGAAAAAGAAAAATAA  
TCTCCCTTCCATTGAGAGAGA

>SsLRR-RLK326

TAGTTTTAAGAGAAGTGTATGTCAAGCTACATTTTACAAAAAAGAAATGGAGGGAGTAGATGTTATTGATTAACCTTACATTGA  
AATGTGCACACTGCTAATATTTTCTTGAAATGGTGTTCAGGTTTTAGTAACCACTCTACCAGTGGCGGACCCAGGAATTG  
GGAGCAGGGTATGCCCATGGTAAATTTTTTGGATGAACAACACAAAAATGCTCAGATCTGCTTAGATAAAAGATACATGTAG  
TTCAAACTAAATTTGTTTCCATAACAAGTTGATATTACAAATTTGGAAGAAAAATTACAATTAATTTTAACTCTTCGATCCCT  
CATTGCTTGATAGTGAATGATGATGTCATGATCTTTGACTTGCAAAAAGAATTCACGCTCAATAAATGTGACCAAAACAATCAT  
TCAAGTACTGGTCTCCCATCCGGTTTCTCAACTTGTCTTACATAAATTAATTATTGAAAACACTCGTTTATCAAAATGTCCGG  
AGCGGCGGCGCGCGGTGAGACTCGCGGAAGCGCTGCTGCCTGCGCGTTAGTGTGCGGCTGCCCTACCCCTACGACCAGGC

CTGATGGTTTTTGGGATTGGAACAGCTGAATCTTTTGTTAGATGGGCCATGGGCCGTCTGGATTGCGGTGGCTTATGGGCTGCTT  
TCGAGTTAGAGGTGAACCTGCTGAATAAAATGGCCCAAAACGCAGAGAAACATAGTTTAAACACCTTATGTATATTATACATG  
TATATACCTCAAATCTAATAAATTTTTTCCAAAAATATAGGGTATGCCCCGGAATACCCGGGCACAACTGTAGGTCCTCGTCC  
ATGCACTCTACTAGCCACCGTGATGACGACGGCCAGCTTGCTCTTTGGCAGGATAACTGCATACTGTTTATCGCTGCTGTATT  
ATTAAGTAAACAAGAGTATAATGCCAAAACACCTTGTTGAGAAGCGAGATTTGGCCATGCTTTAGCACTTGTTCCATATAGTT  
TTATCCTTGGCAGGTGCCACTAGGGTAGATCTAGCGGTGAGGTGGGCGGAGCTCAAGCTCCTCGTATCAATTTACAACAAT  
AGAGTCCCTCTAACTCGCATCAAATTTCTATAGACATGAAAAAGAAAACATGCTTTCAATGTTGAAGATGACATGAGCCGCTTT  
TCTACAATTTTTAGACCCACTACCGTCCGGTATTAGTTTGAAGTCATTGTTCTCACCTACTCCCTCCATCCCAAATTATAAGG  
CATTCCAAGATTCAACAGAAGCTCTCAAGCAGAGAATAGCTGGCTTAGGGGATGAATAAAGAACAACCCACACATGATGAT  
GAATGGAAGCGAAGTAAGTGATTAGCAAGGGAAAAAATGGAGCACTAGCACGCTAAACAAGAAGAGATCTTGTGGATGA  
TCAGTACATCCGGTTTTCTCGGAGAGTCAAAGTATCTTAAATTTGACCAAAATTATAGAGAAAATTACAAAAATTTATAACAT  
CAAATAGGTATACTGTGAAAATATAATTAATGACGAATCTAATGATACCTAATTGGTGTCAATAATATTAACTTATCATATAA  
ATTTGGTCAAACTTGAATTTCTTGAATCTCTAAGATTCTTGAATGTCTTATAATTTGGGATGGAGGGAGTATATAACAGGCC  
AGCAGAAAAAATTTGCTAAGCAGTGAACCTGTGAAAGCTAACAAACAGTCTAGAGCGGAAAAACCCACAGAGAACCAGTGA  
GTCCGTGGTGATCATATAAACTTCTGCTGTCCCTGCCCGGTGTTTCGGCCATCCGCACGGGATCCCGCGGCTCGCCGCC  
CGCCGTACAGAGCCCGTTTCGTTGACTCCGTTCCGGCACCGCAGCGCAGTCCCAATCCAGTCGCACCGCAATCGCAACCC  
ACACCCCTCTGCTCGGTGCTGCGTCTTTGGCGCCGCTAATCTAGCTCTCGAGTCTTGACTTCTAAACCCACGCCACGC  
CTGCTTAAACAAAAGC

>SsLRR-RLK248

GAGGATGGCGCGAGGCGGGCGGCTCGACGAGGTGGAGAGAGGAAGGATGGCGCCAAGTAGGCGCTGGATGCGCCGCAG  
CGGTGCTCGCGGACACCGCCGAATCTGCTGCGACACAGGATAGACAGCGAGGGCCCAACGGGGGAGGCAGCAGCGCG  
GTCAGGTGTGTGCGGCCCTTTGCGCGGAGGTGCCCGCCGCTGCTGTAGAAGGTGCGCGCAGGCTGGTGTGCTGCCCGCG  
CGAGGCGCCCCGTGCTAGAGAAGCTCGCGGTGATCGGCTGGCGCAGCGGTGGAATCTACCGCAGCGGTGAGGGCATGGT  
CGCGCGGTGAAGATGCGCGGACGAGGATTGGAGAATTTGGTGACACACCGTGTGTTTATTAATAGAAAGCGCATGGTCTGTGG  
GCCGTCGCTGTGCACAAGCCTGAGAAGCCATTTGCCCTGTTAATTGTCTTTTCAACTGTACTTTTTTACGCGAATGAACGGTG  
TTTTCTCTTGAGAGAATTAAGAATTTGGCCTCCAAAAAACTTGCTCTTAGGAATCAGGCTCTTTTTTTGAATTTGGGAATC  
AGGCCTCAAAACAAAAATCGCTTAGGAATCAGGCCTTCGCTCAATTTTGACACTTAACGGTGTAAATACGGAGTAGAAAG  
ACCATTTTACCCCTGAGTAAACAAAAATCAAAAAAGAGATTTTGTATTATATATATAGAGTATATAATCAACACACATAT  
ATTCTCGTATATGTATGCTTGTAGTATTATTAAAGGCACGACCATCCAAATGTTGTCTTTATCAAAATTTCAAGATTTTTAA  
AATTGTTGTAATTTTTTGCAATAAATTAATTTCCAAAAATTAATTAGCGCTAATGCATGCATAATTATTAGAGGTCAAAAAAT  
TCATGAATCAATCAAACTAATAAGATATATGTTGTAATGATTGTTGCATTATGCTACAAATAACAGACTCTGTCGTGTGAC  
GGGAAGTGAGGAGCAAGTGGTCTTTTCGCTCGAGCTACAGTACCCAACTAACAGACTACACTCACAGACCTGACGGAA  
GGCTAATAACTAAGAATTTTTCTGGGCCATATACCCAAATTTAAAAAAGGGCCTGATACCTGAAACAACCTTTTTTCCAGG  
GCCAATTCCTAATTTCTCCCTTTTCTCTTACAACAAATCAGCCAACAATACTTTTCAACTTGTCTTTTACGAAAAACGAACGG  
GCCGTCCTCAACCGGTGAGCGCTCTAAAGAGAGCATTTCCGCTATATCAACGGAGGCGGAGGTTTTGTTAATATGAGAGCG  
GTAGGACTAGGGAGTGTAGTACACACATATTTCAACATTTGTGCTAAATAACAAAACCAATTTGAGGACGGAGTAATGA  
GAAAGCAGAGAGAGATAAACACAACAACACCGCGTTGATTGAGGAAAGAAAAACAGGAAGGAGCAAGCAGACGAAC  
AAAACAACAACACCGGTCAAAGGAGACAGTTGGCGTATTGGCAGACCGGAAGCGCAATTCCTGGCCAAACCTTCCA  
AGTTTCCGTCCATCCCGAGGAATAGAATAGGATCTCTCCGTTTTTACCCCTCCTCCGTCTCCCCAGTCTTCTGTTCTAGGACC  
ACACACCCAGGAACAAAACCGCGGCGACAAAAAGAAGGGGAATCGAGGCGGACGCCAAACACTGGGCACAATTCCTCC  
ACCCGTCTCGGCAGCCACCCGCTGCCCTGCCTCTTAATTAACGTAATCTATTTTTTCAAAAACTAATTAACGTAATCTACT  
CCACTCTCTCGCCTTAATTAACCCCACTCTAAATCTACTCGCAAACTACGACGCGGTGTCCGTCACCGCGCTCGACTCGAT  
ACGCCCCCAGCCGGGTAATATACCATGGCCACCACCAACACCACCCACGCCCTCGCCGCCCTCCGCTCGCGCTACGCTTG  
GTTCCCCAGTCTCCTCCCTCCCCACGCCCCG

>SsLRR-RLK309

GATTTGGTAATGCGCACTGTACTAATTCGTTTGTATTGGTAAAAATGTCCAACTTTGACTAATTAGACTCAAAATGTTGCT  
CTTGCAAAGTACAATAAACTGTGCAATTAGTTTTTAATTTCACTACATTTAGTACTTCATGCATGTATCGACATTTTGATGTG  
ATAAGAATCTTCTTTTGCATAATGAAATTTGGGGTTAAATTTGTCATCTAAACAAGGCCGAGCAGTGCAGGACGCGG  
CTGCCAGAGGCAGTCAGGTTACGACAGGGCGGTCTGTTCTTGACCCGTTCCTCTCCACGCCACGCGACCGAGGGAACAC  
CTATCGCTTGCATGCGGGCCAGGATATCTTTCAGGCCCCACATGACAGTGGCCGATACCTCCTCTTGGCCGCTGCTCGGGCC  
TCGGGGGGACCCACCGACTCGGTTCTCTGACGCCCCGGCGGCAAGCAATCAACACCATGCTGATTCCGAATTCGGTTGTCCCC  
TCTCCCTCCGATGAGGAGGCAAGTTCAGCAGCAGATGACAGTTGGCTTCCCTCTTACCAGAATCAACAACAAGG  
AAGAAATCAGCGCATCATTCCTTGGGAGCAGGGAGCAAAATGGCGTAGTAGTTGTGCTGTCTTGTGGGAACCCACGGCAGT  
TTCTTGGCGGTTTTGATTGGACGGGGCCTCAAACCTCTTCACTGACAGCTTTTGAATAACTACTCGCTGATGACAAGATAGTT  
CTTCGGTTCACATGATGCTTCTACGGCCACCTAGCGTGGTTGCTCCAGCTAAGATCCAAATCCTTCAAATCAGTAGTCTGAC  
TCTTGGCGTTTTTCTACTGACTCCAAGGATCGCATTTAGGTTTGTGTTAGTTGGACTTGGAGTACAGATGATTTTGA  
CACTTTTGACAGAGAAGGATATTCTCTGACCGCTCCCGGAGACCAGCTTGGCAGCTACAGTCGATATTATATATATAACCG  
ACAATCGGATCTAAGCTTTTCTGTTAATTGGATTAATTAGCAGTACGGGGCACCAGCTTGACTGAACCTGAACGGATATGCCA  
CTTTGACAGCGATCAGCATGGCTAAAACTGCCATCATCAGCAACACCAGGCTCTTACAGCTTGGCGTACTACCAAGTCCCA  
GCTCCATGCAGACCAATAAAGAAAGCCCGGCAATTGCTAAATCGCGCACCCCATGCAACGCGGGTCCCGCGGATCAT  
CAACGCCCCCGCCCCGCCCCAGCCCCGGCTCGGGCCCCACCCGTCAGGTTCCATGGCATCCATGATCATTTCTCTCTC  
ACTGTCACTGCCACCCAAAGATGCCACGGCAATGGCTGAGTGGGCTGCGAGACAGCAGACAGTACAGCACCCGACCCGGG  
GCATCGGATCCATCGCATCGCCCCATTTCTTCTGCTGCTTGTGCTTTCATGACACGAGAAAAAGCAAAAGCCAAAGGCA  
CTCCCGCCAGCGGCCAGCTCTCACTTTTCTCTCTCCCTCCTCCCAACCGGGCGGCGCTCTCGCACTCATCACTCCGACGT  
TCCCTTCCCGGAGCCAGCTCTTCCGATGGGTTCAGCGGCTCCTCTCCCTCCCGCGCGCGCTCTCGTCTCTCTCTC  
TCTCCGCGCGCTCGTCCCTCGCTCCGAGCCCTCAACCCGAAGGTAACGCCGTTTCGGCAGCTGCCATGGTGAG  
CAACATTCATTGATTGCCCTTCTGGTTTTTGAATCGAGCGCGCGTCCGCTCGCGAGCTCTGCGTGCAGTCCGAGCGCTGAT  
CGCCATCAGGCAGGGGCTGGTCGACCCGACGCGGTGCTCAGGAGCTGGGACCAGGACTCCGTCGACCCCTGCAGCTGGG  
CCATGATCACTGCTCCGCGCAGAACCTCGTCATCGGCCTGTAAGCAAGCTCTCATGCTACCTCTCTCTCGGCTCGTCTC  
GTGACGAGCCGTACGAATAAACTGGAA

>SsLRR-RLK197

GCACGGTTGCAAAAGGATTATCCAAGCTCGTCTTACAAAACCAACCAGGCAATGATGCAAGGCTTCCCTTGGACAGGAA  
GTTGAGATTTGGACAAGTGAAGCAACATTATGACTACCGCCCCATGCTTAGAGCTTTATCAAGCATGCTCACTTCTGCTAGA  
ACATCAGTAAACCTCAGGCTATCTTTGCTACCTCAGGACACCTATCTTTTTCAGTTTTTTCATGCCCCGCTGTACGCTTC  
AATCTCCTTATCTCTTTCGCTACCAACCAATGCCTGTACGGCATGGTATGGTATGGACATTGCAGTATTGCAGATTGGCAAT  
TGGCTTTTGTCTTTTACACACACACACACATACAATGACATAAAGGAGAGGTGCGGCAGAGGAAAAAGAGAAAAAGCGA  
GGGGGGGGGGGGGAGGAGGCGAGGCAAGGCAAGGCAAGCAAGCAATCCCTCAATTTCACTGAAAGAAAGAGTCAAGTCT  
TTCGTGCAAGTGCCTCGCAATGATTTCATCCCAAGGACAGGAAGAGGATGCACATCTGCCATCCCTTCTCTTTGACAG  
TCAAAACAAGGAATAGAGGTTGATGGCATCCTGGATCATCACCAGGCTGATAGCAATCTCTCTGCCCTAGACATCACATAAAC  
CTTCAGTCTCCCTTCTTAAACACCACTCTACATGCGCCGCTCTACTTCTAGACAACAAGTCCCATCACATGACACAGGAAA

GCACGGATGACCTCTAATAATTGCTTATATATGAAAGAGAAGCTATTAGAATCTCTATCTTTGTTTTCTTCAAACCTTTTTTAG  
ATGCCTTTTTTAGAAAATGGAAAATATCCGACCTCTGCAAGACTACAACCACACATAGCCAATCCTTACAAGATTTTCAGCT  
CAAACTACTAAAGAACTTTTACAAGTATACATGTGTGCAAGCACTTTGCATGATAGTAATCTTTCTTTTGTAACAGGCCAAG  
TGAAGTGATACAAACCAGACATGGTAGTAACCCAGCGCCCAGGCTACTGCTATTCTGCTACAGTAGACAGAAGGAACATGAT  
GGTAGTACTCCTATTGTTCTCTTGTCTTGTGACTGGGATTGCGTTGCTTTTAGCTGGTTCTTGATTCTCCATCCACACTGCA  
AGAAGACCAAAATCCCTTGTCCACTTCCCCCTCCACTTCAGGTGAGGTGAGAGCGGAGAGGCACTTCTCCCTGTCATTAT  
CTCCCTCTCCCTCCCCACTCCACAGTCCCTCTACTAAAGACACTTTGCCCGGGTCGTTTATCGCTACACACAGAATTCTC  
ACTTCCCGAGCTAATTGTCCAATGCCATGCTTTGGAGAATTCTTTGTTGCAAGAATCCCCAATCAACTGAAAGGTGCTGT  
TGTGAGTGTGACCTGTCATAGTCTCACTCCACTGCAACACACCCACACTCCAATAAAGCTGATGTCTTTCTTGAGTGGGAT  
CAATAATAATCTGTAAACCTTTGGACTAGATTAGCTAGGCACCTTAAGTTAACAACACACCCGCTACTGTTTTTCATAGCCTG  
GTTTCGTTCTTACAGGCCCAAGAACATAAAAGGGAGGAAGAGAGAGAGAGGGGAGAGGGAGGAGGAATTTCTTGCCCT  
CCTTTGCTGTAATTTCTATTCCAAGCAGGCTCAGGTGGCAGGCATGTTTGCCCCCCTCGGCCCTCGCGCCTCGCCCCCT  
CCTTTGTGCTCCTGCTTGTGCGGCCAGAGCACAGGCATCTCTTTGTGTCATTTGCATGCTATACTGACAGCTTCTCAG  
AGCAGAGCATCCCGCACCCTTCCAGGCTTCCACTGCCACTGGCAATTTGGTTCTGTGGGAAGAGAAAGGGTG  
CATGATTCTTCTCGCCTTGGCCTCACCTTGTCTCCATGTTTGAACACGGAGCAAGCTCCTGAACTCGTTGCCGAGGAGGC  
CACGCTCTTGCGCTGCTTGGCA

>SsLRR-RLK243

ATTCTGGGGCGGTTTAGATGGTGAAAAAGTTTCTGTAAAGTTCTGTAGCACTTTTCGTTGTTATTTGGTAAAAATTATCTAAT  
CATGAACCTAAGGCTCAAAAGATTTCGTCTCGACATTTACAGACAAACTGTGCAATATTATTTTTTTTACCTACATTTGAT  
GTCCTATGCATGTGTCTAAAGATTTCGATGTGACGGAGAATCTGTAAATTTTTTGGAAATTTTGAAGAATAAACACTGCCTT  
GTCCTTTGGGTGAGTATTCTTGTACCTCGAAGATTGCTGTAGTAGTAATGCTGAATCTATGCGAGCAGGCTGTGCTGATGCT  
GCAGCAGCCTAACTAGAACAGCTGATCAGGCCACATCTTCTCGCAACTACTAAGTGTGCATCTTACAGATGATGACCATGC  
ATAAGTTGCACGGTTGCAAAAGGATTATCCAAAGCTCGTCTTACAAAACCAACCAGGCAAAATGATGCAGGCTTCCCTTGGGA  
CAGGAAGTTGAGATTGTGGACAAGTGAAGCAACATTAGACTCAAAAGATTTCGCTCGAACTTTACAGACAAATGCAATGATGATT  
CTGCTAGAACATCAGTAAACCTCCAGGTTATCATCTTTGTCTACCTGACGACCTATCTTTTTCAGTTTTCATGCCCCCGTG  
TACGCTTCAATCTCTTATCTCTTGTGACTACCAACCAATGCCTGTACGGCATGTTATGTTATGGCACATTGCAAGTGTGCGA  
TTGGCAATTTGGCTTTTGTCTTTAGGCTGCGTTTAGTTGGGAAAGTTTGGGTGAAAAGTTACTGTAGCACTTTTCGTTGTTAT  
TTGGTAAAAATTGTCTTATATGAAAGAGAAGCTATTAGAACTCTATCTTTGTTTTCCTTCAAACCTTTTATAGATGCTTTTTTT  
TTTTTACCTACATTTAATGTTCCATGCATGTGTTAAAGATTTCGATGTGATGGGTGGAAGAGGAAATATTTGGGTTTGCATG  
GCAACTAAACAGGGCCTTACACACACATACATGACATAAAGGAGAGGTGCGGCAGAGGAAAAGAGAAAAGCGAGGGGG  
GGGGGGGGGACAGGCAAGGCGAGAGGCAGCAAGCATCCCTCATTTCACTGAAAAGAAAGGTACGCTTTTCGTGCAAG  
CTGCCTCGCAATGATTTCATCCCAAGGACAGGAAGAGGATGCACATCTGCCCATCCCTTCTCCTTTGCAGATCAAAACAAGG  
AATAGAGGTTGATGGCATCCTGGATCATCACCAGACTGATAGCAATCTCTTGCCCTAGACATCACATAAACCTTCAGTCTCC  
CTTCTTAAACACCACTCTACATGCGCCCGTCTACTTCTAGACAACAAGTCCCATCACATGACACAGGAAAGCACGGATGAC  
CCTCTAATAATTGCTTATATGAAAGAGAAGCTATTAGAACTCTATCTTTGTTTTCCTTCAAACCTTTTATAGATGCTTTTTTT  
AGAAAATGAAAAATATCCGGCCTCTGCAAGACTACAACCACACATAGCCAATCCTTACAAGATTTTCAGCTCAAACTACT  
AAGAATCTTTACAAGTATACATGTGTGCAAGCATTTGCATGATAGTAATCTTTCTTTTGTACTAACTGCCAAGTGAAAGTGAAC  
AAACCAGACATGGTAGTAACCCAGCGCCAGGCTACTGCTATTCTGCTACAGTAGACAGAAGGAACATGATGGTAGTACTCC  
TATTGTTCTCTTGTCTTGTGACTGGGATTGCGTTGCTTTTAGCTGGTTCTTGATTCTCCATCCACACTGCAAGAAGACCAA  
AATTCCTTGTCCACTTCCCCCTCCACTTCAGGTGAGGTGAGAGCGGAGAGGCACTTCTCCTCTGTCATTATCTCCTCCTCCT  
CCCCACTCCACAGTCCCTCTACTAAAGACACTTTGCCCGGTTGTTTATCGCTCACACCAGAATTCTCACTTCCCGAGCTAA  
TTGTCCAACTGC

>SsLRR-RLK293

CCGACTCGTACGAGGCACCCCGACAGGAACGCTCGTCCGCGCCCGTCCCGTACAACAAGGCACCCGCGCTCCGACTCGC  
ACGAGGTCGTTTCGGCCACCGGTAAACTCCGACTCGCATGACCCCGGGTCAGAGCGCTCGACCCACTTATTCACCTACC  
CCGAGACAAAAGTCAGAGCATTTAATGCAATTACCTACTACCACCTACCGACATGGCCACAACCACGATCGACGTGGGAGC  
AACGCGCGGTGTAGTCTCTCACTGTTTACCACCCATCCCGTATGGGGGGTGAAACCTGTCACTGTACACACCTTACCATGC  
ACTGTTTATCGCCAGTCAACCTCGAGGGAGGATACGACAAGGCCGTATTCGCGATCTCGGGGACTCGGCCTTATCCGTCT  
GGCCACGGCCCGGCTCGACCCAGCCTCGACGCCAGCGCAGTTTCGACAGGGAAGAAAGGCCGACGTGGCACAGGGTTCC  
GGGTCAATTTCTGCTCTCATCCCCGATGTGCATCATGGTGTCCAGGGATGGCCAGCCATTCTAGACCACGCCGCTACAGTCAC  
CTCTACAGGGATGACAAAACATCACTTCAAGACTTCCCGGTGTCCCGGTCTCCTCTTACCCTATAAAAGGGCAGGCCAGG  
CTCTACGGAGGACGAAGGCAAGACACAAGTCCAAGGAGTCCAGCAAGCAAGGCTCCCAACTCAGAGATCA  
CATCTCAAGCAATCACCCCTATACTTTTTTCTCTCCTTGTAGACTTTGGGCTCGGCGCCCTCTCTCAAACTTGTAAACCTT  
ACGCAAGCACCTCGGTGTAGGAAATACAAAACCTCTCCTCCCCCGCTGGACGTAGGGCCTTCTTTTGCTCGAACCAGGATA  
AACCCCGGTGTGTTCTTCTTGATCACCATCCAGGTTAGGGACACGCAACAATCACTTGTGCGTTTAGGACCCCGCGGGAC  
CGAACCCGACCGGCTCGTCAACGGAGACCTCACCGCGGTGAGCTCCACCACGTACCCGCGCGGTGACAGTCAACG  
GGTTGGCAGGGTAGGTTTGACCGCGGTCAGTGAGAGTGGGTACGCGGGAGTGAGTGAGAAAAGTTTTC  
ACTGTTTTTGTATTTTCAGAAAATATAACATGTGCTGAACCTTTGAAATTCATAACTGATTGTTGGAGTGTGATAAAATGTG  
AAACTTTATGTGTAGTGCTCTATCCATGAAAAATATTAGTTGGTCATAATAAGTAATTTGGTATGCTTAAAAATTCTATCTTG  
CGTGTGTACGGACACGACGCGGTGTGTACGTGTGATGTGATAGAGTGTGTGAGTTGTGTGTGTGCCAAGTTGTACCTGAT  
TAGAAAAAATCAATCTCCTCACTCAGCACACGAAAGCTTCTGCCAAATCAAACCTTGTGCACTCTCAACGATGCTCGATT  
AATCCAAATTGAGTCCACCAATGCCTAAATCGAACACAGGTATGGTAATGGTAAAGTTAGCTTGGCCAATGGATAAGCATATA  
TGTGCTCGATGAAGATACGAAATGGCTACAAAGATGTTTATAGTATGGATCACACTAGATTGCGTGAACATACAAAGCATGG  
TGTTCTTCAAAAAAATAACATAAAAGCATGGTAAACAAGTGACATGGCATAAGCACTTACTGTTAGCCATGCTTTGTGG  
TAAACAAGTGACATGTAAACTTGGTAACAAAACATTTCCACCACCAACTCCCCCGCTCGCTTGTAGCGCTTTGGCCTCTT  
CCTCCTGTCTGTCTTCTGGGCCCGGACGCCAACCCTGCTTATCGTCAACCGATGCTTGGCGCTAAGTTTTTTTACTGG  
TACTTGACCGCAGGAGTAAACAATGGAGGACGGATGCCGTGCCCCGTGATTATATAACTCGCTCCGAGCCGAGGAGGCC  
ACCGCTGGTGTGCCCCACCGGTCACTGTCCAGGGC

>SsLRR-RLK294

TGTGAAAATGAATTATCACATTTCTGAAACCAAATACCAAATTATTGTGTTACAACCTGTGTGTTTCCCATGTGTCAATCACAC  
TGGCTCTTCGGGCTGTTTGTAGGATGGAGCCCTTTGTTTTTAAAGATGTAGTACTCCCAAGGGCTGTAAAATGATTAGTA  
TGTTTTTGTGATATACTTACATATGGGTGATGTTTCATGCAAGTGGCTTTGGGGCTGTTCTTAGGTCGGTGCCCTTTGTAAC  
AAGAGGTCCGTATTCCTAAGCGTTCACTGGGGCAGAAAGAGCTACACTTGTAAATAATGGTGGACTGATTCCTCTTCTGAA  
GAGGATAAAGCTAAAACCTTTCTCCATTGTCTAAAAAAGGATTGGCGTGCTTTTGTGATATACTTACAGTATGATTCAGGGTA  
GATTGTGTTAATGACATGACCAACTGGAATACATTCTAGTCCAGAAGTTCTGACATACTGTTGACACCAAGATGCAATCT  
GATTCCTTAAACAGAACAGATTTGATAGATCTTTTTTAGGCATATGTTTAGAGAAATAAGTGCAAAAATGATGTATGATTTT  
GTTCCGAGCTCTGTTTCTATTGTCTTAGGGCTGTAAATTCANNNNNNNNNNNNNNNNNNNNNNNNNNNNNNNNNNNNNNNN  
NNNNNNNNNNNNNNNNNNNNNNNNNNNNNNNNNNNNNNNNNNNNNNNNNNNNNNNNNNNNNNNNNNNNNNNNNNNN  
TCGCCCACCGGTCACTGTCCAGGGCCATTAATGTCTCTGACAGACAGCAGGAGCGGGCTGCGCTGCTTGTGCTTTGCG  
CTGTGTTGGGCGGGGAGTGTGGCTGCGTAGGTGAGAGCTCATCCAGTGTGCACTGGGGGCTCTCGCTCTCCCTCTCTCC

CTCTGCTGTGTCCATTCTTGCCTGCCCGGCTGCTTGTAGGTGTTGAGGAAGAATGGGGGAGAGAACGTTGGGGATTCCGCG  
GCGTTTCAGGAGCTGAGAAGCTTCTTGCATTAACTGAGCTCTGCAGTTATTCTTGCTCCTGCGTTCCCTGCATTTTCAGGTCA  
GAAGCGCAAAATTTCTTGCCTGCAATTTCCAATTAGAGCTATGAATGTCGTTTCTCCTCTGACGCTAAATTTGGTTCCACATGAGA  
CATGTGCTTCTCTGCTCTGTAACGCTGTGATTCTGTTTGCAGACACACTCTCTTTTTTTTTCTTTCTAATTTCCCTCTTT  
TTTCGCTTCTTTTTAAGTTTCGATGCTCTGAGAGTCTGAGTTGTTCCCTGCTGCAAAATCTCAGTTGCTTCCGGTTTCGGGCATC  
CTAGTTTGTCTAACTCTCATTTTCCCTTTCAGCTGAATTTCTTCTACCTTAGCGGGATTCTGTTTCCAAGCCTGCTGCATTT  
CATGGTAGGTTTCGCTGCAATTTCTTGTGCAAGCTCAGATTTGTTTCTTATTGTTGCCATTTTTTACC AAAATCCCTCTCAT  
GGGTTCTTGCAAAACCACAGTTTCCAACCTTGAAATTTGATTTGTGCCACCAGGGTCTTAAGGAATGGGAATCCGAATTCAC  
ATTGCGAGTACAATCTGCCAGCCACACCTGTCTGTCAATTTCTTGTGCGGTTTCCAATGATTTATATTTAAACAAAAGAAAC  
CAAATATGTTGCTTTGTCTCATCTACGTTTCGATCTGACGCACTGGTTCTTCCGTCCAGCATCCAATGTGGTTTCTTAATGAT  
AAGACAAGGACATGAGTCAGTTTACTGACATGTTGCCTTGTACTTCTGTTGTTACTATACGTTTGTCTACATCCAATTTGGG  
CTGAAAATTGTACTGTAACTTCTGCAAGAACTCATATTTGGGAGCAAGCAAGGCAAGGTTTCTCTCCGAGGAAGCATGTT  
TCAACTGCAGTGCTCCTGATTTTGGTGGCTTGAAAGTGATAAAGTTTAGCAAGACACTAAGCCAATTGAGAAAGGATAGTGC  
TAGCTGAGCTCCAA

>SsLRR-RLK273

CTTTGTGGTAAACAAGTGACATGTTAACTTGGTATAAAAACATTTCCACCATCAACTCCCCCGCTCGCTTTGTGGCGCTTTG  
GCCTTCTCCTCTGCGCAGTGGTCAGTGTCTGCTTCTGGGCCCGGCAAGCAACCACTGCCCTTACCCGTACCCGATGCCT  
GCGGCTAAGACTACCCGCACTGGGTACTCTAAAACGATACTCTAAAGTTTITAGAGTATGAATATAGAGTAAAAACTGCTGCA  
CTGGGTACTCTAAAACGATACTCTATCCTTTCTCTCACTCTATATTAGAGTAGTACAGTGCTTACTCTATACTCTATAATGGCG  
GGCCCCACTAGCTAATCAAAGGGGAAAAATGCTATAACTCACAAACCAAAAATCCAAATTAATTTTCGATTGCACCATTTAA  
TTGCTCTCAATAAATCTTTCAAAAACTAGATCACACATGGATATATTAGATAAAGTGATAAGTGGGTCCCGGTTGGATAGAG  
TGGATAGAGGATGATATAGAGGATGGATGGATGCGGGGAGAATTGAGTATAGAGGAGAGAATCTTGCTGACTAGGATGTATAG  
AGGATGAATATAGAGGTCCATGAGTGCGGGTAGTCTAAGGGTITTTACTGGTACTTGACCGGCAGGAGTAAACAATGGAGGA  
CGGATGGCCGTTGCCGATTTATATAACTCGCTCCGAGCCGAGCGGCCACCGCTGGTGTGCCACCGCAAAATTTCTTGC  
GGCCCATTAATGTCTCTGCAAGGACAGCAGGAGCAGGACCGCTGTGCTTGTGCTTTGCCTGTGGCGGGGGAGTGTG  
GCTGCGTAGGTGAGAGCTCAATCCCGTGTGCACTGGGGCGCTCTCGCTCCTCCCTCTCCTCTGCTGTGTCCATTCTTGCC  
TGCCCCGGCTGCTTGTAGGTGTTGAGGAAGAATGGGGGAGAGAACGTTGGGGGATTTCGGCGGTTTCAGGAGCTGAGAAG  
CTTCTTCAAGTTTAACTGAGCTCTGCAATTTCTTCTGCTTCCCTGCAATTTCAAGGTGAGAAGCTGCAAAATTTCTTG  
TGCATTTCCAATTAAGAGCTATGAATGTCGTTTCTCCTCTGACGCTAATTTGGTTCCACATGAGACATGAGTGCCTTCTC  
TGCTCTGACTACGGTGTGATTTGTTTGCAGACACACACTCTTTTTTTCTTCTTCTAATTTCCCTCTTTTCTCCGACT  
TCTTTTAAAGTTCGTATGCTCTGAGAGTCTGAGTTGTTTCTCTCGCCGCAAACTGAGTTGCTTCCGGTTCGGGCACCTAGT  
TCGCTAAACTCTCATTTTCGCTTTCAGCTGCATTTCTTCTTACCTTAGCGGGACTCGTTTTGAAGCCTGCTGCGTTTCATGG  
TAGGTTTTTCGCAAGCAATTTCTGCTTGAAGCTCAGATTTGTTTCTTATTGTTGCCATTTTTTTACC AAGTCCCTCTCATGGGT  
TCTTGCAAACCAAGGTTTCCAACCTGAAGTTTGTGTTTGTGCCACCAGGGTCTTAAGGAATGGGAATCCGAATTCACATT  
CGCAGTACAATTCGCGAGCCACACCTGTCTGTCAATTTCTTGTGGGTCCCAAAATGACTTATATTAAACAAAAGAAAC  
AAATACTGTTGCTTTGTCTCATCCTACGTTTCGATCTGACGCACTGGTTCTTCCGTCCAGCATCCAATGTGGTTTTCTAATGAT  
AAGACAAGGACATGAGTCAGTTTACTGACATGTTTGCCTTGATCTCTGTTGTTACTATACGTTTGTCTACATCCAAATTTGGG  
CTGAAAATTGTACTGTAACTTCTGCAAGAACTCATATTTGGGAGCAAGCAAGGCAAGGTTTCTTCCGAGGAAGCATGTT  
TCAACTGCAGTGCTCCTGATTTTGGTGGCTTGAAAGTGATAAAGTTTAGCAAGACACTAAGCCAATTGAGAAAGGATAGTGC  
TAGCTGAGCTCCA

>SsLRR-RLK285

CGTGTATGTCCAAGTTGTACCTGATTAAAAAAATCAATCTCCTCACTCGGCACACGAAACCTTCTGCCAAATCAAACCTGT  
GCACTCTCAACGATGCTCGATTCAATCCAAATTGAGTCCACCAATGCCTAAATCGAACACAGGTATGGTAATGGTAAAGTTA  
GTTTGGCCAATGGATAAGCATATATGTGCTCGATGAAGATACGAAATGGCTACAAAGATGTTGTTAGTATGGATCACACTTG  
ATGGGGTGAACATACAAAGCATGGTGTCTTCAAAAAAAAACATACAAAGCATGGTAAACAAAGTACATGGCATAAGC  
ACTTACTGTAGCCATGCTTTGTGGTAAACAAGTGACATGTTAACTTGTCTATAAAAAACATTTCCACCACCAACTCCCCCGCT  
CGCTTTGTGGCGTTTTTGGCCTCTTCCCTCGCCAGTGGTCAAGTGTCTCTGCTTCTGGGCCCGGCAGCCAACCACTGCCCTT  
CACCGTCACCGATGCCTGCGGCTAAGGTTTTTACTGGTACTTGACCGGCAGGAGTAAACAATGGAGGACGGATGCCCGTG  
CCCGTGATTTATATAACTCGCTCCGAGCGGCGCACCGCTGGTGTGCCACCGGCTCACTGTCCAGGGCCCATTAATG  
TCCTGCAGGACCGCTGCTGCTTGTGCTTTGCCTGTGTTGGGCGGGGGAGTGTGGTGTGCTAGGTGAGAGATCAATCCC  
GTGTGCACTGGGGCGCTCTGCTCCTCCCTCTCCCGCTGTGTGTCCATCCTTGCCGTGCCCTGTGCTGTGCTAGGTGTGCG  
AGAAGAATGGGGGAGGAACGTTGGGGGATTTCGGCGGTTTCAGGAGCTGAGAAGCTTCTGCGATTTAACTGAGCTCTGC  
AGTTATTCTGCTCCTGCGTTCCCTGCATTTTCAGGTGAGAAGCGCAAAATTTCTTGTGCAATTTCCAATTAGAGCTAATGT  
CGTTTCTCCTCTGACGCTAATTTGGTTCACATGAGACATGACTGCGTGCCTTCTGCTCTGTACTACGGTGTGATTCTGTTT  
CGAGATGCACCTTTTTTTTTCTTCTAATTTCCCTCTTTTTTCGCTTCTTTTTAAGTTTCGATGCTCTGAGAGTCTGAGTTG  
TTCTCGCTGCAAAATCTCAGTTGCTTCCGGTTCGGGCGCTCAAGTTTGAATAACTCTCATTTTCCCTCTCAGTCTCATTTCT  
CTTTACCTTAGGCCTTGTGATGCATGCACGTGTGTTTCAGTGGAAATAGAATGTAATTTAGTTTAAATTTTACTTCAATCCACT  
TCAACATACGTTGATTTGAGACGAATACATGCACATCAAAACAAGCCCTTAGTGGGATTCGTTTCCAAGCCTGCTGCATTTTCATG  
GTAGGTTTCACTGCAATTTCTGCTTGAAGCTCAGATTTGTTTCTTATTGTTGCCATTTTTTTTTACC AAAATCCCTCTCATGG  
GTTCTTGCAAAACCAAGGTTTCCAACCTTGAAATTTGATTTGTGGCCACCAGGGTCTTAAGGAATGGGAATTCGAATTCACAT  
TCGCACTACAATCTGCCAGCCACACCTGTCTGTCAATTTCTTGTGCGGTTTCCAATAATTTATATTTAAACAAAAGAAAC  
CAAATATGTTGCTTTGTCTCATCTACGTTTCGATCTGACGCACTGGTTCTTCCGTCCAGCATCCAATGTGGTTTTCTAATGA  
TAAGACAAGGACATGAGTCAGTTTACTGACATGTTTGCCTTGACTTCTGTTGTTACTATACGTTTTTGCCTACATCCAAATTTGGC  
TGAAAATTGTACTGTAACTTCTGCAAGAACTCATATTTGGGAGCAAGCAAGGCAAGGTTTCTTCCGAGGAAGCATGTT  
CAACTGCAGTGCTCCTGATTTTGGTGGCTTGAAAGTGATAAAGTTTAGCAAGACACTAAGCCAATTGAGAAAGGATAGTGT  
AGCTGAGCTCCA

>SsLRR-RLK424

GCTATTTGCCTACGTGGCAGGAAAGAAAATGGGAAAACCTACAGTCACCAGCGACAAAACCTCATCGCCTAGCTCGCACATTCC  
CCGTACACTCACTATTTCTTACAGCACACCCACTCCCATAAAGCTGTTTTTTTTCTTATTCTTTTATTTCGAATCCGCGAGCGG  
ATTTGCAAAATGCTCGTTGAGGACGCCCTAAAGATCAATGCCATGTCCACACTTAAATGGCACAACTGAGTCTTACCTCA  
AGTAGTGAGTATACGGTTGAGCTTAAGATCTTCCACAGCCCGATAGTATTTTCTGTTAGTACCTGAGCGTTTAGCTTTATGAAA  
AGAAAGCATAAATATCCATCTAATCTAGGTTTTATAGGAGGAAGTCCATTTTGGTCCTTGAATTAGTCATATTTAGCTCCCA  
AATTCAAATATCCGACTACTTTGGCATTTCAAGTATCCAAACCAAGAATTTATCCCTCGAATTGTTTCTAAACCTGATTTTT  
AATTTGCTGATGTGGTATTTTGCATGCTTTTGCATGCTTTTGAATGCAGTTTAAACAGCACAGTACAATATCGTTTAA  
AAAAACAGCACAGTACAATACTTTGCAGGTAAAGTCCCGCGTCATCAGGTGTTAAGCAACCTAATCTATTGGACTCTGATA  
CGATTTCTCCGGCTTTTCGAAATCCCGGAAGCATAACGAAACACATGCGCCCTCACCAATCCACTCAAACCCCTGTGCTGCGC  
CGTAACTGACGCCGATTGCAAGTGTGCGGACGCGGCGGTTACTGCCAAATCGTGGCCGATTCTCGCACTGATC  
CGCCGCGGAAGGAATCAACGCTAGCCGGCCGGTCTGACGCGTTTGACCCCGGCACTCGGCGGCCCCCGTGTGGCGCTGCG  
GCTGCTGCGGCACGCACTTGGGTTTTCAGCAAAGGCGACGAGGAAAAGCGAAGTTCCAAGCATGAGCAGGAGAGCAGTT  
CAGTGCCCTTTCGTAGTACTCGATCGATTGACTCGTCCGTGGAAGTTCCGTGCGCTCCACTCCAGTCCATGGTCCATGCCTT



GCCGAGGAGTGGACTGTGCGATGCGACGAGCCATGTGTGCTGTGTGCAATTGCAATTGCAATTGCTAGTGGTGGCTGCGCTGGCA  
TTCCATCGCGTGTGACCGGATTGCGCGGGGCCAAGTCGTGAGTCGTGCGACCTCGCTCTGACTTTTGGAGAGCATCGTTTCG  
CGGTTTCTCTTCTGCGAATCGTGGGTGATGATGCCAGCGGACTCTCGCGGCCCTGCGGGGCTGCGGTTGCCAAAGAACT  
GGCCTTGCCAGGACAAGCCGCCCGGCCGCCACGATACGCGGGCGCATGCTTCGGGCTCCGCTTGTGTTCCGACCG  
TCCTTGGAGCCACGCATCGTTTTCTACTGTCACAGACCACACAGCAGAGGCCAGTTTAAATTCCTCCCGACACTTTAAATA  
CAACAGCCACCTGGCACTGACATGTGGACTACCACAGGGATCCACACACCAAGTGAACCGCCCCACAGGCCAGATGGG  
ATCTGCCGTCAGGCCAGATGGGATCTGCCGACGTACGGTCCACGCCTTACGCAAGCCATCCATTCCGCGACGCCACGTC  
TTCCGCGGGCCCGGCCACCGCCTCACTGCCACCGGTATCCACCCGAGCAGCGGCCCCACGCGTCAGAGAGTCTGTAG  
CCAGACGCGAGGGAACAGACGACAAACCACACAGTGCAAGGCTGCTGCTAGCGTTAGTGCGACCGTCCCCACTGCAAGTT  
CGGCTGGAGAGCACTACTCGCGCTGCTCCGTCATCCATGGCGACCTCCACTCCACCACCTGCCTCCCATGCCTTCTCTCC  
CCCCACTGAGTCACGCTGACCAGTAACCCCTTCTCTCTCTGCTCTAGCGTCGACATTCCCGGCCACCCCTGTCCACA  
GCCGTGACAACCGTCTGGGACACACGACACGA

>SsLRR-RLK398

TATATTTAGATAAAGTGACAAGTGAATCCCACAATAGATAGAGTGGATAAAGGATGATATAAAGGATGGATGGGTGCGGGAG  
AATTGAGTATAGAGGAGAGAATCTTGCTGACTAGAACATATAGAGGATGAATATAGAGGTCCACGACTGCGGATAGCCTAAA  
AGATCGATGCCATGTCCCGCACTTAATTGGCGCAACCTGAGTCTTACCTCGAGTAGTGAGTATACGGTTGAGCTTAAGATCTT  
CCACAGCCCGATGATTTTTCTGTTAGTACCTGAGCGTTTATGAAAGCAAGCATAAATATCCATTAATCTAGGTTT  
TTATAGCAGGAAGTCCATTTTTGGTTCTTGAAGTAGCCATATTTAGCTCACAAATTCAAATATCCGACTACTTTGGCATTTC  
AGTATCCAAACCAAGAATTTTATCCCTCGAATTTGTTTCTAAACCTGATTTTAAATTTGCTGATGTGGTGTGCAAGGATGGGCT  
TTTTGACATGCATTTGAATCCAGTTTAAACAGCACAGTACAATATCGTTTCAAAAAAAAAAACAGCGCAGTACAATACTTTGCA  
GGTAAAGTCCCGCTCATCAGGTGTTAACCAACCTAATCTCTTTGGACTCTGATACGATCTTCCGGTTTTGCAATCCCGGAA  
GCATAACGAACACATGCGCCCTCACCAATCCACTAAACCCCTGTCGTGCGCCGTAACCTAACAGCCGATTGCAAGTCGTC  
GCCGACGCGAGCGCGCGGTTACTGCCAAATCGTGCCAGTTCTCGCACTGATCCGCCGCGGAAGGAATCAACGCTAGCCG  
GCGGTCTGAGCGTATTGACCCCGGCACTCGCGGGCTCGCGCGCTGCGCGAGCTGCGCGCACTGCGGATCTGGGTTTT  
CAGCAAAGGCGACGAGGAAAAGCGAGGCAATATAGCAGCAATCCATCCAGTCCAAGTTCCAAGCATGAGCAGGAGAGCA  
GTTCACTGCGCCTTTGTAGTACTCGATCGATTGGCCATGTTTAAATTTTCAAAAAATTTCAAAATTTCTCGTCACATCGAATGTT  
GGACATATGGAGCATTAAATGTAACCAAACTAATTCATAGTTCCGTTAGAAAACACGAGACAAATCTTTAAACCTAATTA  
GTTCAATAATTAAACGATTAATAACAAATACAAACAAATACTACAAATAGCCAAAGTCAAAATATTTGGCGCACTAAACACAC  
CGTGACTCGTCACGTGGAAGTTCCGGTGCCTCCACTCCAGTCCATGGTCCACGCTTCCCGAGGAGTGGACTGTGCGATGC  
GACGAGCCATGTGTGCTGTGTGCAATTGCTAGTGGTGGCTGCGCTGGCATTCCATCGCGTGTGGCCGCGATTGCGCGG  
GCCAAGTCGTGAGTCTGCTGCTCTCGCTCTGACTTTTGGAGAACATCGTTGCGCGCTTCTCTTCTGCGAATCGTGGGTGA  
CGATGCCAGCGGACTCTCGCGGCTGCGGGGCTGCGGTTGCCAAAGAACTGGCCTTGCCAAGGACAAGCCGCCCGGCC  
GGCCGCCACGATACGCGCGGCGCATGCTTCGGGCTCCGCCCTTGTGTTCCGACCCGACCGTCTTGAGGCCACGCATCGTTT  
TCACTACTGCACAGACCACACAGCAGAGGCCAGTTTAAATCCCTCTGAGGCCCGGACACTTTAAATACACAGCCACCTGG  
CACTGACATGTGGGCTCGGACTACCATCAGGATCCACACACCCAGTGAAACGCGCCACCACTTCCCTTCGTTTCTGCCGTCAG  
GCCAGATGGGATCTGCCCCAGCTACGGTACCACGCGTTCACGCAAGCCATCCATTCCGCGACGCCACGTCTTCCGTGGGCC  
GGCCACCGCCTCACTGCCACCGGTATCCACCCGAGCAGGCGGCCCCACGCGTCAGAGAGTCTGTAGCCAGACGCGAG  
GGAACAGACGACAAACCACACAGTGCAAGG

>SsLRR-RLK412

CGTCGCCGACGCCGAGCCGCGCGGTTACTGCCAAATCGTGCCAGTTCTCGCACTGGTCCGCCGCGGAAGGAATCAACGGTA  
GGCGCGCGGCTGACGCGTTTGACCCCGGCACTCGCGCGGCCCGCTCGTGGCGCTGCGGCTGCTGCGGCACGCAGCTTGG  
GTTTTACGCAAGCGCAGGAGGAAAAGCAAGCAATATAGGGCTGTTTAGTTTGCAAAATTTTTTGCAAAAGTCACTGTA  
GCAGACTGTAGCATTTTCGTTGTTATTTGGTAATTAGTGCCAATCATGAACTAACTAGGCTTAAAAGATTCTGCTCGTGATTT  
ATAGCTAACTGTGTAATTAGTTTTATTTTTATCTACATTTAATGCTTCATACATGTGTCTAAAAAATTGATGTGACAGGGAATC  
TGAAAAATTTTTGAAAAAATTTTGGACCCATAGCAATCATCCAAAGTCCAAGCATAGCAGGAGAGCAAGTT  
CAGTGCCCTTTCGTAGTACTCGATCGATTGGCCATGCTTAGTTTCCAAAAAAATTTAAGGTTTTCCGTACATCAAATGTT  
TGGACATATACATGCACCATTAAATGTAAATAAAAAAAGTAATTACATAGTTTGGTAGAAAACCTACGAGACGAATCTTTAAG  
TCTAATTAGTTTATAATTAGACACTAATTGACAAATACAAATGAAAGTGTACGGTAGCAAAGCCAAATATTTTCGGAACCTA  
AACACACCGTGACTCGTCACTCGTGGAAGTTTCGGTGCCTCCACTCCAGTCCATGTCCATGCTTCCCGAGGAGTGGATGTG  
CGATGCGACGAGCCATGTGTGCTGTGTGCAATTGCATTGCTAGTGGTGGCTGCGCTGGCATTCCATCGCGTGTGGTGTGGCCG  
CGATTTCGCGCGGCCAAGTCGTGAGTCGTGCGACCTCGCTCTGACTTTTGGAGAACATCGTGGGTGATGTGCCCCAGCGGA  
TTCACGCGGCTCGCGGGCTGCGGTTGCCAAAGAACTGGCCCTTGCCTTGTAGTTACCAGAGTCGGGGGTGGCCGATT  
CGGCACAGTGCCACCCCGGACACTGTAGCACTTTTGTGTTTTTTTTTTTTTGTCTAATAATTGTCCAAATCTTAATTAATTA  
GGCTTAAAATGTTTCATCTCGTAAAGTACAACAAAACCTGTGCAATTAGTTTTTATTTCAATTATATTTAATATTAATATGTG  
CGCATTTTGTAGTGTATGGGGAATCTTCTTTTTGTCATAGTAAATTTGGGGTGAATTCTGGAATCTGAACAAGGCCCTTGCCA  
AGGACAAAGCCCGGCCGCGGCCACGATACGCGCGCGCATGCTTCGGGCTCCGCCCTTGTGCTCCGACCGCCCTTGTGAG  
GCCACGCATCGTTTTCACTACTGCACAGACCACACAGCTGAGGCCAGTTTAAATTCCTCTGAGGCCCGGACACTTTAAATAA  
AACAGCCACCTGGCACTGACATGTGGGCTCGGACTACCACAGGGATCCACACACCAAGTGAACGCGCCCCACCACTTCCTT  
CGTTTCTGCGGTCAGGCCAGATGGGATCTGCCCCAGCTACGGTCCCACGCGTTCACGCAAGCCATCCATTCCGCGACGCCAC  
GTCTTCGCGCGGCCCGGCCACCGCTCACTGCCACCGGTATCCACCCGAGCAGACGCGCCACCGGTGAGAGATCTCTG  
TAGCCAGACTCGAGGGAACAGACGACAAACCACACAGTGCAAGGCTGCTGCTAGCGTTAGTGCGACCGTCCCCACTGCAA  
GTTCCGGCTGGAGAGCACTACTCGCGCTGCTCCGTCATCCATGGCGACCTCCACTCCACCACCTGCCTCCCATGCCTTCTCTCT  
CCCCCACTGACCAGTAAACCCCTTCTCTCTCTAGCTTCGACATTCCCCGGCCACCCTGTCCACAGCCGTGAC  
AACCGTCTGGGACACACGACACGATG

>SsLRR-RLK433

TAAATACCGAAAAAGTATCCTTCTTGCCACCACCTTGCCCATCGAGACTAACGCTCTCCCTCCTCATGCGCTAGTCGCGCTAAAAT  
CGCACCTTATGTACTCGGTCTTAGTCTACTAAGTCTAAACACTTTCGACTCTAACGTGTTCTCTCCATAGTTCTAACTTCTCAT  
TAACCCCTTCCCTACTGTGCTCAACTAGCACCACATCATCAGCAAAGAGCATACACCAAGAGATACCACCTTGTATGTCTCTT  
GTGACCTCATCCATCACCAAAACAAATAAAGGGCTTAAAGCTGACCCCTGATGCAAGTCTAGCAGTCTAGCAGATACAATATCGTTT  
AAAAAAACAGCAGTACAATACTTTGCAAGTAAGGTTTAAACCACTTACACCTTGTCTGTTTCTGCTGTTTATTTGATG  
TAAAAGTACTGTTTCGTGGTTTGTGTGAGAGAAAAATACTGCTGGATGGCTGCTGATTCTGCTGATCAGCGAAACGAACAT  
GGCGCTAATCTAATTGGACTCTGAACCTGTGATACGATCTTCCGGCTTTCGCAATCCCGGAAGCATAACGAACACATGCGCCCC  
TCACCAATCCACTCAAACCTCTGTGCTGCGCCGTAACAGCCGATTGCAATCGTCGCGACGCGGAGCCGGCCGGTT  
ACTGCCAAATCGTGCCAGTTCTCGCATGATCCGCGCGGGAAGGAATCAACGGTAGCCGCGCGGCTGACGCGTTTGACCC  
CGGCACTCGGCGGCCCCCGTCTGTTGGGCTGCGGCTGCTGCAAGCAGCAGCTTGGGTTTTAGCAAAGGCGACGAGGAAAA  
GCGAAGCAATATAGCAGCAATCCATCCAAGTCCAAGTTGAAGCATGAGCAGGAGAGCAGTTTCAAGTCCCTTTCGTAGTACT  
CGATCGATTGGCATGTGATTTTCAAAAAATTTTCAAGTTTCAAGTTCACGTCACATCGAATGTTTAGACACATACATAGATTAAT  
ATAGACGAAAAAACTAATTACACAGTTTGTAGAAAAACACGAGACGAATCTTTTAAACCTAATTAATTTATAATTAGACA  
CTAATTAACAAATACAAACGAAACTACGGTAGCCAAACCTAAAAATTTTCGGGAACCTAAACACACCTGACTCGTCAAGTG  
GAAGTTCGGTGCCTCCACTCCAGTCCATGGTCCATGCCTCGCCGAGGAGTGGACTGTGCGATGCGACGAGCCATGTGTGC



GGAACGATGGCGACGCAACCTTTTGTTCGTTTGCCTTGCAGATGCGAAAACGACAGCCACCGAACATGGTGGGGGCGTG  
TGAGAACATTCATACACGACGGGCGAAAAGGGCCATCCATCCAGTCGCGTCCTCCGACCCACATGTACAGGGGACGATG  
CCATGGCACAGTTACACTAGTACAGCTTGCAACACAAAAGCACTCGCGTAATCGCGTTTCGTCGGGTGCAAGATCCGCGCCG  
CCCCTGCCCGCCACCCGCGGGAGCGGAAGTGAGCGACGTCTCCACGCATCTGCACCCGCGCTGGCGCTGCGGGCCTTCTC  
CCCGCCACCCCCACTCCCACTCATCCCGACCCGCGTTCCCGTGGTCAACTCGTGCCTCTCCAGCGACGACCGTGAGG  
GGGCGAAATAGGCAGGCAGGCAGGCCACCAAAAAAGCGAGCACCTACACGCACCACCTCGGCTGCCATTGCCATTGC  
CATTGCCATACCATTGGCCACGCCATGACGCCCCGCCCCGCTGCACGCGCTCACACCCCCACCGCTCCACTCCGCTCCGCTC  
ACCCTCACCCACCACCTCCCC

>SsLRR-RLK18

CGCACAGAGCTCTCTGGTGAGCAGGCCTCCGGAACCTTCTCCCGTCAAGCGTACCTGCTCGGGTAGGCGGGAAATCAAGTTT  
TTGGGGAGCGCTTCTAGGCGCGACTGCTCTGGTGCTCTGGTGCCGGTGACAAGACTGACTGCTCTGGTGCCGGCGACAAG  
GCTGTCTTCTGCTGTTGGACTCTGCAAGATGGTGCTGATGAGAACTGGTGCCGGCAACAACATCGCCACTGGCGATGGTGG  
CAACGACGACAATGGTGGTGGTTCACTGTCCGCGGGTACCAGCAGTACCACGCTAGGGTATAAACCGAAACCTCTCTGTTT  
GTACTTCATATTATTATGCTCCTGCAGTTCTGTTGTGCACAATAAGCTGTGCTGGAAGTAGTAGCAAAATAATGCTTTTCTGT  
TATGCATGATTAGCAGTAGCAAAATATGAAGTTGTCTGTTGCATGATACTTGTGTTAGTATTTTGTCTATCATATTTATGGATTAAT  
GCATGGTGTAAAATGACTAAATATCCAACTATGATTATCAGTTTGTCAAGGACATATGATTGAATTTCTAATTTGGACCAAC  
TTAAACTTGGCGCATCTCTAAGTATGTAGTTTGTAGACCACTGAGTTAATTTGGACTCTGAACATTCGCTATCTTAAGAT  
AAGCTCATCGATCTCGTCGGCAGCGTGTACTGTGACTGAACTTTCCTAGTGACACCTACTAGCTAGCTTGTCAACAATCTGGA  
ATAACCAGTCGTCAACAGCCATCGTTCTACAAGACCCAAACGACACACCCGGAGACTTGGACCCGGCGGCGGCCAGTCGG  
CAGCATGGATCATTGCGCGACACGACGCATCAAATCATTACGCATCAACTAGCAGGCGAAAGGATGCATAGACTACAGAAC  
ACCCAAGAAATTAGCAAGAAACCTGACTCACGGCATCGGAGCATCGTCTGGCAGCATCTTCTCCACTTATCCACAAGCAT  
TTGTCAATTATCGATACTTCTACTAACAAGCAGCTTTGACTGGTTGACTAGTTCTATTGAGTACATTTTCGTCTCTAATACG  
TAAAAGGGGTGTCTAGAGACATATTACAGTTCCAGTCTTCTCAGTGTCTCGTTGGCCAGGAGAGATCGAGCAGCAGTCGG  
GAAAAAAGAAATTAGTAAAGCAAAACCCAGAAACCCAAACACACTTGCCTGGAGACTCGAGTTACGACTCATTACCATATTTGT  
GTAGTCTAGTAAAGAAAGCTGTGCCCTTCCACTATTTTGTGTTGAATGTTGTCGTATTTATCTTGTCTTATTCGTTTCTGTGAAAT  
TTAACTTATACCGAACTGTATATGAAAAGTATTACTGAAGTAGTGACAGCAGAACATAGCCATGTGTTGGTGTGGTTTGGAGA  
AATTTAGTTTGAATTTCACTCTAATCGACCCTAATGCATGGATGACAAATCCGACTACGTCCCAAGAATACCTTAGCAACG  
ATTTTAAAGTAAAAAAGAAATGGCGTAATCTTAACACCCGACGCCACACATGAGGCACGTTGTACTGTACCAACGCGCT  
GTTGCACAGGAACGATGGCGACGCAACCTTTTGTGCGAGATGCGAAAACGACAGCCACCGAACATGGTGGGGGCGTGTG  
AGAACATTCCATACGCGACGGGCGAAAAGGGCCATCCATCCAGTCGCGGCCCTCCGACCCACATGTCAGCGGCACGAAGCC  
ATGGCACAGTTACACTGACGTTGTCACAGAAAGCATCGCTAATCGCGTTTCGTGGGTTCGAGTCCATCCATTCGCGCCGCG  
CCTGCCCCGCCACCCGCGGAGCGACGTCTCCACGCATCTGCTGCACCCGCGCTGCCGCTGCCGCTGCCGCTGCCGCTGCC  
GGCTTCTCCCCGCCACCCCCCACCCTCCACTCGTCCCGCACCCGCGTTCCCCGTGGTCAACTCGCTGCCTCTCCAGCGA  
CGACCGCGAGGGGGCCGAAATAG

>SsLRR-RLK19

ACTGCTCTAGTGCCGGTGACAAGGCTGTCTGCTCTGGTGCCGGCGACAAGGCTGTCTTCTGCTGTTGGACTCTGCAAGATG  
GTGCTGACGAGAACTGGTGCCGGCGACAACACCGCCACTGGCAATGGTGGCAACGACGCAAAATGGTGGTTCCTGCTGTC  
CGCGGGTACCGGCAGTACCATGCTAGGGTATAAACCCGAAACCTCTGTTTGTACTTCATATTATTGCTGCTCAAGTTCT  
GTTGTGCACAATAAGCTGTGCTGGAAGTAGTAGCAAAATAATGCTTTTCTGTTATGCATGATTAGCAGTAGCAAAATGAAG  
TTGTGCTTGCATGATACTTGTGTTAGTATTTTGTCTTATCGTATTTATGGATTAATGCATGGTGTAATAATGACTAAATATCCAAC  
ACTATGATTATCAGTTTGTCAAGGACATATGATTGAATTTCTAATTTGGACCAACTTTAACTTGGCGCATCTCCTAATAATGT  
GAGTTTGAGACCACCTTAGAGTTAATTTGGACTCTGAACCTGGGTAGTTTAAAGATAAGCTCATCGATTCGTGCGGCAGCGTGTA  
CTGTGACTGAACTTTCCTAGTGACACCTACTAGCTAGCTTGTCACAATCTGGAATAACCAAGTCGTCAACAGCCATCGTTCTAC  
AAGACCCAAACGACACACCGGAGACTTGGACCCGGCGGCGCCAGTCGGCAGCATGGATCATTGCGCGACACGACGCAT  
CAATCATTACGCATCAACTAGCAGGCGAAAGGATGCATAGACTACAGAACACCCAAGAAATTAGCAAACTGACTC  
ACGGCATCTGGAGCATCGTCTGGCAGCATCTTCTTCCACTTATTCACAAGCATTTGTCAATTTATCGATACTTCTCTACTAACA  
GCAGCTTGTAGCTGGTTGACTAGTTCTATTTGAGTACATTTTCGTCTCTAATACGTAAGGGGTGTCTAGAGACATATTACAGGT  
TCCAGTCTTCTCAGTGTCTCGTTGGCCAGGAGAGATCGAGCAGCAGTCGGGAAAAAAGATTAGTTAAGCAAAACCCAGA  
AACCCAACACACTTGCCTGGAGACTCGAGTTACGACTCATTAACCATATTTGTGTAGTCTAGTAAAGAAATGCTGTCCTTCC  
ACTATTTTGTGTTGAATGTTGTCGTATTTATCTTGTCTTATTCGTTTCGTTGAAATTTAACTTATACCGAACTGCTATATGAAAAGT  
ATTACTGAAGTAGTGACAGCAGAACATAGCCATGTGTTGGTGTGGTTTGGAGAAATTTAGTTCAATTTCACTCTAATCGACCT  
AATGCACATGATGACAAATCCGACTACGTCCCAAGAATACCTTAGCAACAATTTTAAAGTAAAAAAGTGGCGTAATCTTA  
ACACCGCACGCCCCACACATGAGGCACGTTGTACTGTACCCACACGGCGCTGTTGCACAGGAACGATGGCGACGCAACCTTT  
TGTTGCGAGATGCGAAAACGACAGCCACCGAACATGGTGGGGGCGTGTGAGAACATTCATACACGCACGGGCGAATAGG  
GCCATCCATCCAGTCGCGCCCTCCGACCCACATGTACGCGGCACGAAGCCATGGCACAGTTACACTAGTACAGCTTGCACAC  
AAGCTCATCGATCTCGTCGGCGTTCGTCGGGTGCAGAATCAATTCGCGCGCCCTGCCCGCCACCCGCGGAGCGACCTTCC  
ACGCAGCTGCCGCTGCCGCTGCCGCTGCCGCGCTTCTCCCCGCCACCCGCGTTCCCCGTGGTCAACTCGCTGCCTCTCCAGC  
GACGACCGCGAGGGGGCCGAAATAGGCAGGCAGGCCACCAAAAAAGCGAGCACCTACACGCACGCACCCACCTCGGCT  
GCCATTGCCATTGCCATACCATGGCACTCCATGACGCCCCGCCCCGCTGCACGCGCTCACACCCCCACCGCTCCACTCCGC  
TCCGCCCTACCCACCACCTCCCC

>SsLRR-RLK24

GTATTTGAATTAAGGTGATATTAGTTTCAAACCTACTTTGCTTCCGCTACTTTTGAACCTTGAGTTGTAATAACTCTACTGAACCTC  
CGATATAATGTTGAATTAATGAAATGGATGTAATATATGACCTGTTATGTTGGACCACTACGATCTTGGCTGTATGTTGGTT  
GGTTTGAATCCCTCGGGATTTTATTTGGACTACCGGGTTATAGGAGCTTAAGTACGGGAATTTAATTGCTCTGGCGATTGTTT  
TTGTAATTTTGTCTTATAATTTGGGCGGTTCCGTGACACCGGCAGTACCATGCTAGGGTATAAACCGAAACCTCTCTGTTT  
GTACTTCATATTATTATTGCTGCTGCAGTTCTGTTGTGCACAATAAGCTGTGCTGGAAGTAGTAGCAAAATAATGCTTTTATGT  
TATGCATGATTAGCAGTAGCAAAATATGAAGTTGTGCTTGCATGATACTTGTGTTAGTATTTTGTCTTATCGTATTTATGGATTAAT  
GCATGGTGTAAAATGACTAAATATCCAACTATGATTATCAGTTTGTCAAGGACATATGATTGAATTTCTAATTTGGACCAAC  
TTTAAACTTGGCGCATCTCCTAATAATGTGAGTTTGTAGACCACTTAGAGTTAATTTGGACTCTGAACCTTGGGTAGTTTAAAGAT  
AAGCTCATCGATCTCGTCGGCAGCGTGTACTGTGACTGAACTTTCCTAGTGACACCTACTAGCTAGCTTGTCAACAATCTGGA  
ATAACCAGTCGTCAACAGCCATCGTTCTACAAGACCCAAACGACACACCCGGAGACTTGGACCCGGCGGCGGCCAGTCGG  
CAGCATGGATCATTGCGCGACACGACGCATCAAATCATTACGCATCAACTAGCAGGCGAAAGGATGCATAGACTACAGAAC  
ACCCAAGAAATTAGCAAGAAACCTGACTCACGGCACTGGAGCATCGTCTGGCAGCATCTTCTTCCACTTATTCACAAGCAT  
TTGTCAATTTATCGATACTTCTCACTAACAAGCAGCTTGTAGCTGGTCGACTAGTTCTATTTGAGTACATTTTCTGCTCTAATACG  
TAAAAGGGATGTCTAGAGACATATTACAGTTCCAGTCTTCTCAGTGTCTCGTTGGCCAGGAGAGATCGAGCAGCAGTCGG  
GAAAAAAGAAATGATTAGTTAAGCAAAACCCAGAAACCCAAACACTTGCCTGGAGACTCGAGTTACGACTCATTACCATATT  
TGTTAGTCTAGTAAAGAAAGCTGTGCCCTTCCACTATTTTGTGAAATGTTGTCGTATTTATCTTGCCTTATTCGTTTGTGTA  
AATTTAACTTATACCGAACTGCTATATGAAAAGTATTACTGAAGTAGTGACAGCAGAACATAGCCATGTGTTGGTGTGGTTTGG  
AGAAATTTAGTTCAAATTTCACTCTAATCAACCCTAATGCACGTAGATTGATACAAATCCGACTACGTCCCAAGAATACCTTA  
GCAACAATTTTAAAGTAAAAAATGGCGTAATCTTAACACCGCACGCCACACATGAGGCACGTTGTACTGTACCCACACGG

>SsLRR-RLK409

AACACGCACTC

CGGGTCACCGGTCGAAGTGCACACACACTGCCGAGGTGGTTTCGTCTCCCGTAGGCTCGGCAAGTCGCCATCGGCCATCGTCGTCAATCGACGTTGTACTGCGCGTCTAGATACACCCGGTTTTGGAAAGGATCCTGGCCATTTCCGGTCCCCGAGAGACTCCCCGGCTACTGTACTACTGAGAGCTACTAGAGCAGCGACTACTACCGACAGTAGTAAACGCAAGGTCACGTTTCCAACCTTGTCGCGGGTAGTATTGGTCAAACCTCGTGCTCGTCGTCTAGAACCAACGAGTAAACGTGTACGACGACGCGGCCGCGGCAGCCGCTAGCGGGCCAGGACAGGAGGAAACGAGACGAATAGGAAACAAAACCCGGCAAGAACAGCTATGCCACGAGGCGGAGGAGGGAGGCGCAGCGCAGGGCCGACAGGCCGACGCCAACAATCCCGTCGTCTCAGCCGCGAGGCGGGCCACATGCTTCCCCCGCGGTCCACGCCGCCGCGCAGCTGTGTCGCCGCGAGGACAGCCAGCCGAGCCGCCACCCACAGAGTCCCCCCCCGCTCGTCAACCGGGCCCCGCCAGGCGCTAGCGTGAGCCGACGCGCCCAATCATCCATCCCCACCCACGACGCGCAGTAAACAAAACGAAACAAAGCCACCCCCGTGCCGTGTCTCGGCCAACGCCGACGCCGAGGCAAGCGGGCCACCTTTTTTACCACCACTGTTTGCCTGTCGTGTCGTTGCGTGCTCCCTCCTCCCTCGTGGTGCTGTCTAGGCAGCCAGCCCGCGCTACTTGCCATTGCGATTGCGTCGTCTGCTCGTCCGATCCCAACACCCACCTCCTCTGTCTGTCTCCCGGCTCTCGCGCTCGTGCCTCCGTCACCTCTCTGCTGCTCAGCGCCCCATTGCTCCGAGCGCGCGGATCTAGGTGACCGCCGCGCGCGTCCGAGCGGTTGTGATCCGACCCGTGGGGCGCGCGCGCGAATGGTGTGATCGACCCGTTGGGAATTTGGGAGCGAGGCCATGCACGCGGCTCCGGAGCGCCGCGCGCGCGCGCGCTCTGTCTGTGGCGCTGTGTCGCA TTGGCGCCGCGCGGAGGCTCGTGCGCCGCGCTACCCGACGCTGCTGACGGTAGCCTGTTGCTGTGCTTCCCCCTCCCC TCCCCCTCCCCCTCCCCGCTTGCCCCGCTGCTTGTCTGTCTGCTCGCAGCAGTAGTTGGTTCCGTGGACTACCGCTTCCGCGCGCTCGATCGTGCCTGGTTTGGGGTTTTGCTGTGCGCGGGTGGGTTGTTCCGGTCTTGTCCGTGGTACTCTACTGCGAAGCGA AGCATCCAGCCACCAAGCAGGGGGATCAGATGATTGATCTGTCGCGTGCTGACGTGCTGGTGACATGTGTGTGTCTGCCGGG GAGCGCGGATTCCGTTGCTCTCGACTTTGCTTTTCTCGCTGCCGCCCACTGTAGTTAAGGATATGCGTGTGCGGACG TGCGGTGAAATTATGTCCGTTGCCGCGCTGCTGTGTGCGGTGACAAAGTGCAGAAATGAGGAGGGCCTCTGCTTTTTCGGA TTATTACAACCTTCGTCTCGACTCCGTGAGCGAACCCGACATCCGAGCTCGCTCGCTGGCTCGCCGACTGTTAAGTTTGTGTC ATCGAACCTGCAACCTCGTGTCTGTGTAAGTGCAGGGCGGCTGTAATTTTGATCGCTTGGTGTGTTTCATTCTGTAATTTCTGT TGTTTGTACCAACGGGGCGCTCCCTTCGGTGGGATAACGAAAGCAACTCTTGAGGCGTTATCGAAACAAGCTGCCTGC CCTCTGCTCCTGTCTTATCTCTTATGACAGCAATGACAGACGTGGA

>SsLRR-RLK85

TCGATCGGGCTGGAAGACGCGGACAAAAGGCTACGAGCTAGTAGGAGGGAGTACGCGATCATTCCGTGACCCCATCCATT  
TTGTCCATTGGCCTAGCGCCAATGCCATCATCTGTTGCCAGAAATCGAAAGCCGACACGGCTCCTACTCATTACCTCGGGACCTG  
TTGAATCCATCGTATTTTACACGCTCCTTTGCGCTAGCGCCACAGTGACCTGCACACGATTTTGGCAGCAGGATTTTG  
ATTTCGTTCTTTCTTTTCTAAACATCCACATGTCACGCCATAAGGATGCACATATGCACGTGGTAGCTTATACAAACGTCGGT  
GTGTCGTGACCACTGATAGATCTCACTGTTTCTACGCCATATTAGTAAGACACAAAACGTTAAAACATAGGGTTTAAATCCTCT  
CCTATGGCTATTGATATGATAGACTACCTTCTACTAATAAGACATTAAGTTATTTCTTGTTCTCGGATTATTTGCTCTCTCTTAG  
GCCTTCTGCATTTGTATGAATAAATTGGTTCACTAATTTGGTGAGCTAGATGGCATGCGAATTTGACAAGGCTATTATATTAC  
GAGCAAATATACATGTGCATTGTAATGAAACATACAACCTTGTAATGCGCTGTGTTTCGAGATAAGACCTCATGTTGGATCTAA  
ATTTGGAACATGTGGACGACAAAGATGAGATGTGACGAGAATTGGAACATTAAGGGTTGTTTGACACAGTTGTAAAGACC  
TTGAGCGTACACATTGTATAATAAAAAATATTTATGTAACACATACATGATTAATCTAAAAATATGCTTTTTGACCATAAAT  
AACATCAATGTGGCCATTCCTGTTGCTCAAAAATAGTAGGCGGTAGTAGTAAGAAATTTCTGCCCTAAGACTTTTTTTGC  
AACCTAAAATCCCATGAGCTGCTCCGTACAGCTGCTGTGCGCCAGCTGCTACTCCGACGGCGAGCCATGGACACTGGC  
GCTGGCAGCGCGCAGCAGCGGTGAATTCAAAAGCGGCTCGTTTCGGTGGGGCTTCTCGCGGCTGCCCCGAGTGCCCCAG  
CTGTTCCGCTCGCTCGCTGCGCGACTCAACACGAGCGTCCCCACCTCGCGCAGTCCCGCGCATTAACGCTCCCG  
TTTGCTCCTTTTCCGCGCGCCGCGACGGACTGCGACGAGCGGATAGATAGATCTGTGCTGTGCGTGACGACCCAGCTCTCT  
ATCTATCCCCGTCCTGTCTCGCCATCCTCTTCTCTCTCTCTCTCTCTACTCCCCACCGACAGAGCGAATCCTTAGCG  
GGCAAGCTCTTCGAGCTCGTGGAGTGGGGTTTAAACGCGGCCGAGAAAGGAGGACCGCATCGCTGCTGCTGGTGC  
CTAGTCTTCGGTGGCGAGCGTCTCGGTAAAGCGCGCTCGGCGTCGGAGCGCGCGCAGAGACTGGAATGCTGTGCTGCGCA  
GTGCAGTGTGCTTGGAGACAGGATCTGCTGCAAGGTATCAGGGCTTCTTCTCGCCTTTCTTCTTCTGATTTCTTGAGGT  
TGTTTGGAGTCCCTGGTTTTCGGGCTCTACTTCTCTCGCTCGTTCCTCCGCTTTGCAATCTCCCACTGATGCTCTTCCATG  
CGAAGAAGATGTAAAGCGTTAAAGCATTTTTTTGGAAGAGATGTTAAAGCAACTCAAGTAGTGCTTTTCATACGCACAG  
GCGAGAAGAGACTGCCTGAAAACAATTGCAGTATAGGAAGCGTCGTGATTTCTTTAACACGCGTAACCGCAAGAAGCGAGA  
ATTAGTTTTTTTCCCTCCAGAAGATGTTGTGAGCTTGTGAGTTTGATACTGAATTTGGTCCTTTTTCCTTTTTCGTTCCG  
AGAATCTTCCGTCATGACGATTGTTTACTTTCTCGTGCCTCTCGTCCCTTTGTCCTCGCTTCTACTGTTCCCTCCTTTTTT  
TTTTGACCCAGGCT

>SsLRR-RLK214

TACAGATAGCGAAGGTTTCGTCAATGAGCTAAACGATCTTGGIAGGTCACCATTTGAAAGCATTGAATGACAGATCCCTGAAAA  
ACAGGGTAGGGGACAAACTTCACATGAGTCGATGAAGATCAAATAAATTGGGACATTTTGTGTTGCAAGGATGGTCAGGATA  
TGAAAGATGCCATTGCCATTGAAGGGTGGAAAGCGAAACTGCTCTAGCATCAAATGTGCATTTTTCACAAACAAAAATGAA  
CTGGATCTTGGAAACGCGACAGGTGGAAACCTGTTTGAAGGAAGCAGACAAGATCTTAACCAAAAAAGAAAAAGAAAA  
GAAAATAAAGTCGAGACATTTAGGACAGCTTGCTGAGCACACAACATATTTGCTATGATGAGCAACAAACCAACAAAC  
CATCCATTGTGAATGACAAAACATACATGACATCGGTCCGATGCAAGAAAAACATGTATGGGCAAACTGAGTAAACCAAA  
GGACCATATCCCAAATGTATTAGATGAATAAAGCTAGCAAAACGAATGTGTAGACATCTGATTAGACGAATAAAGCTAGC  
AAACGAATGTGTAGACACTAATGTACTGCTGAAGTTTCTACTGTAGATGCATACATNNNNNNNNNNNNNNNNNNNNNNNN  
NNNNNNNNNNNNNNNNNNNNNNNNNNNNNNNNNNNNNNNNNNNNNNNNNNNNNNNNNNNNNNNNNNNNNNNNNNNNNN  
GATTCACACCGGTCTGGAGGGTCGGATGGAGGTGGCGGATCAGGAGGGACATGCTCCATTGCCGAGGGGACCGGAGCAT  
GGGGTCGTCGTCGCTCATGGCTAGGAGCGGCAGGAGGAATCGAAGAACAGGAGCATGAAAGGAAAAAGTGGTATTGAAT  
GCAGTTTCATAAAGCATGATAGCTGGGGAGATTACAGAGGGGAGGGCCACAAGCTCGAGGGGAGTAAAGCGGGCGGCGTGT  
GGCACGGAAACGGCAGAGGGGCGGGAGGTGTGCGACGGCGCCCTGCAAGTATGCGGGGAGGTGTCATAGCCACCGTACCTG  
GAGCAGGAGCATCGGAGACTCCGGTGTAGTGGTGGATCCCAACCGATGGAATGAGCAGAAGGAGTCAAAAAACCATGGATCG  
GAATCAACACAGCACGAAGATTAGGGATCTGCAATTATTGACGCAGATTGAGGAGATGAAGATCACGGATTGTGGAGGATTA  
GGGAGGAAGGCAAGAAGGACCGGCAAGCTCGCCCAAACTACTCAGAGACTTCGCGAGCAAGCATCGACAAACCGGGCGT  
TACCCCTCTGAATAACAATTTTAGTTCCTTAGTCTATATTAATCTCATACATAAATTAACGTCFAAATAAAGGGGACC  
CAACTTTAGGGCGCAACTAAACAAGCCTGAGTCTTTGTTTCACCAACAGCGCTAGTTTCAATTGTGTGTTTCTGCTGTGCGTTAA  
ACGGGGCGCATGATGCTCTCTGTAACCTTTAAGACACTCTGACGATCTGCTTGAGACCATAACCATATGTACATGGCATGATGTT  
CGATGACATGGAAGTTGAGGCTGTACCGCCCTCGGTAGCTTGAGTCTGAGCATAACCGCCGACATGTGACAGTACAAAC  
CGCCCATCTCCGCACTCTTCGTCCCTCTTTCCCTCCCAAAACGGAAGCCCTCCATCGAATCAACACAAACCGGCAAA

ACCCCAAAACCCCTCACCATCTCGGAAGCACCAGCATCATTCCGCAAGGCCACGCCGGGCGATTGCGCCCGCTACGGCTGCCC  
TGTTCTCCAATCCGCGATCTGGTACGTGATCCGAGCGCATCTCGCGGGTCCGTGCGGAATTGGGGGAGGAATCAAACGG  
TGCCGGAAGCGCGCGGTTCCCGGAAGCTTCCAGAACGTTCCGGGGCCTCCCTGCTCCGGTCCGCGCTCCGGATCCGACCCA  
GATTCGGGGGCGGATTCCGCGGGGGGATTGCTGGGTGCGCGCGGGAGGGGTTGGA

>SsLRR-RLK239

CATTAATATGATAGGACTAAACTTTAGGAGCCACAGCGCTAGTTTCATTGTGTGTTTCTGCTGTGCGTTAAACGGGGCGATT  
GATGCTCCTGTAACCTTAAAGTTTGACATTCTGACGATCTGCTGAGACCTCGGTGCGTTGAGAGTTTATGGAAGTTGAGGCTGT  
ACGCCACCTCGGTGCGTTGAGTCTGCTTACGCGCCGTACGTGTGACAACCGCCCTTCTCCGCACCCCTTGGTCCCCTCT  
TCCTTTCTCTTTCTGACTGTTGCGAGTGGGATACTCTAAACGATACTATAAAGCTTTAGAGTATGAATATAGAGTAAAACTGT  
TGCACCTGGGTACTCTAAACAATACTCTATCTTTTCTCTACTCTATATTAGAGTAGTACAGTGTCTACTCTATAGTGGGTAG  
TGACGGACCCCACTAACTAAACAAAAGAAAAATGCTATAACTCACAACTAAAAATCCAAATTAATTTTCGATTGCACCAATT  
AAATTCGTCTCAATAAATCCTTCAAACTAGATCACACATGGATATATTAGATAAAGTGATAAGTGGGTCCCACGGTGGATA  
GAATGGATAGGAGATGATATAGAGGATGGATGGGTGCGAGAAGATTGAGTATAGAGGAGAGAATCTTGCTGACTAGGACGTA  
TAGAGAACGAATATAGAGGTCCATGAGTGCGGATAGGCTTAGTCTATTTTAAATACTGCATATGTCAAGCATACTAACTTTAAA  
GGGCGTAACTAAACAAGCCTGAGTTTTGTTTACCACAGCGCTAGTTTCATTGTGTATTCTGCTGTGCGTTAAACGGGGCG  
ATTGATGCTCCTGTAACTTTAAGACACTCTGACGATCTGCTGAGACCAGTAAGAGCATCTCCAAGAGTTTGCTATCTTAACCT  
GGCATCCATATAATTTTAGCAAAACAAGAAAAATAGTACCAACAGTTTGGCAAAACAACCTTGACATCAATAGCAAGTTG  
CAAAAACGCTCCTCAACGCGCAATATACGCGCTCATCGCTCGCGCGCATCCTCGTGCGCATCCGGTGATTCTGTGACAGC  
TTGCTTGTGCTCTCCCGAGCCTGTACATTTTGTGCGAGTTGTCTGCTACTCTAGCTAGTGCACTCGGTTTGTCTTGGCTGCT  
AGCTGGTGCTGCTGCGCAGCATTAGCTGTTGCGCTTTGTCTGATTGATGCCGTTGTTTCTTGTTTACTGCTGCTACGGATCCAT  
GTCCCTCGTTGTGCTCTTTGACGACAAGCAAGCATAGTACCAAGATAGATACTGCTGACACCAATGACCATGTTTTC  
AGCTGGGACGGTGACCGGGAACAGATGGATCGCAGCGGAAAAATAGCCCATGGGCTTCTTTTTTTTTTGTGTTGCCAA  
GTCAATAATAGCAACTATAGGAGGGGGACAGTTTTTTTACTTGGCATATAGTTTGGGAGCCAAGTAGAAATTTGACAACTC  
TTGAAGATGCTCTAAACGTGTGTGACATGGGCACATGTTCCATGACATGGAAAGTTGAGGCTGTACGCCAATCGGTGCTGATG  
GTCTGGCTTACGCGCTGTGACAACTGACAACCGCTCTTCTCCGCACTCTTTCGTCCTCTTCTCTTTCCTCCCAAAACC  
GAAGCCTCCATCCGAATCAAACCAACGGCAAAACCCCAAAACCCCTACCATCTCGGAAGCACCAGCATCAITCCGCGAGG  
CCACGCCGGGCGATTGCGCCCGCTACGGCTGCCCTGTCTCCAATCCGCGATCTGGTACGTGATCCGAGCGCATCTCGCG  
GGTCGGCGCGGAATTGGGGGAGGAATTCAAACGGTCCGCGGCGCGGTTCCCGGAAGCTTCCAGCGGTTCCGGG  
CCTCCTGCTCCGGTCCGCGCTCCGGATTGCCCGAGCCGATCCAGGATTCGCGGGGGACCGGCGGGCGGATTGCTGGG  
TGCGGGCGGGAGGGGTTGGA

>SsLRR-RLK107

TGGTTGTTGGATTCAITTCGAGTATTGTACGCTTAGGCGAGATTGGTTCTAGATTGGTAATGGGAGCCCGGGTGAATTT  
ATTCCCGGATTCGGTGATGCAAGTTTCTTTCTCATTTTCCCTCCCTTGTGAGGGGACGCATGTTGTTCAAGTTGACTAGTACTT  
TGTTCTAAGGTTTCACTAAGCTTTATTTTGATGCTCCGAATGTTTAGGATATCCGAAAGTTAATTTATCCACGCCATTAGCCT  
GTTTTGTGAAGCAGTCTTCTCTTTAGGAGACAAATCTGAACCTTGGCTGACAATCTTCTCTTCCGTTGGACTGTGCAAAAGA  
ATGCCGACGCCTTTGCACACCTGAATGGAAATCTTAGTTAAGCAGTAAGCTAAATACGTGGCTGTTACAATTTGGATGCGCA  
TGTTAGTTTCCCTTCTGTGCCAAATTCACCTATTTTCCCAAAACCGAGTAATATATGTGAAGAATGCAAAAGGTTATTGTAG  
GTGTCGTATAGGCTCTTTTTACTGTGATGTATATTAATGATGCTTGGTTGATAAGCAATAGGATCCCTGTGCTATG  
AATATCAGATGCTATTCATCAGTGAAAGACTGTCAATTCGTTCTGTTTACTGCTGTTGGTGCTAGTTATTTACACCAATTGAACAGGA  
AAACTGTGGTCTTAGACTCTTATTTTAGCGATTAGCGAAGTGTAGTGCATATCCCCCATCCCCACATCTGACTTGATATATTGC  
CCTGGTGATGACAGTGATAATGGGATAATAATCTGTTCTCTTCAATTTCTGCTTGCTTATTTAGATGGAGGATGGCGAATCTA  
CTTATAGTGTGGATGAGGCACTTGTGTCTATGGGGTTTGGGAATTTCCACGCATTCGTTCTTGCATACCTCGGAATGGCTAA  
ATCTCTGAAGCAATGGAGATGATGCTTTTGTCAATTTGTTGGGCAATCAGTTCAAGCTGAGTGGGGGCTTCTGACAGGAAG  
AAAGCTCTATAACAAGTGTGTCTCTGTTGGGACAAGTGTGTCTCTGTTGGGATGCTTGTANNNNNNNNNNNNNNNNNNNN  
NNNNNNNNNNNNNNNNNNNNNNNNNNNNNNNNNNNNNNNNNNNNNNNNNNNNNNNNNNNNNNNNNNNNNNNNNNNNNN  
NNNNNGCACCAGATTGTTACATTACTGTACTATTGCTTTTCAATAGAGATGTACAATTGCTACATGTTTTTGTCTCTCCAAAT  
GGTATTAGAGCAGCTCCAGTGTAGTAAAAAAGGAGAGAAAGAGCAGGGTTCGCTTTTATACACTGCAGGGATCCAACCTCT  
GGGGAACACTTCTTTGGATCAGTGCAAGCAATTTGTTTATTTCAACTTAACACCCATCTAAATCGAATTTTACACAACAGCAA  
GCGAACCATGAGAAACATCGGCTTTTACTGGGCCACAGCTTATAAAACCGAACTTACACTGGAGCTGCCGTCTGAATTC  
TTAAGCTCTGAATCTTAAACAGTTTGAAGAAAGTAACATGTTTCTTGTCCGGATCATGTGTGGGAAAAAATAACAACA  
TGAAGCTGGAAAAAATAGATGTGAAAAAATACAAAAATGAAGCTGGAAAAATATAAAAGATTTCGTTGCCGGGACTC  
GAAACCGGTCTCTCGGTTGAGAGCCAGTATCTAACAGTACTACAGTACAACGGATTGTTGATGGTAGACATGATATGC  
TTTAATTAATTAGTGACATTAGAGCCATTCAAAGCAATGGTTTGGCGACACTCTCGTGCTCCAATTGGCGAGCGGTCTCGTTCC  
ATCTCTGTTCCCGTCTCTTCTCCTCGTCTCCTAATTTGGGAAGGCCGCACTTTCACCGCGAGACCTGTATCCCATGAAT  
CCATGAGAGAAAGGCGGAGGAGATGGGCGACGTACGCGCGGGGTCTCCTCTGACGCTCTCAGCTGAACCGCGCCGTG  
TTCCCTTGGCGCGCAATGGC

>SsLRR-RLK29

TGAACGTCTATGTAGCTAAACGGACATGAGTTCTTACATTGTTCAAGACCAAATATCTGAGATTCTATACAATCTAAAAAATG  
CAAAAGACAAAATAAAAATTTAAATAGTTTAGAAATCACAGAGGTAGTAGCGATGTTCAATTTATGCTCCAAATATTATAGA  
TGGTTTGTATGCAAAATGACACCATATTAGGAGCCCAAGTCTCTCTCTCGGAGGTTGGGCTATGATTTTAAAGTTGAAAC  
TTTGATAATTTTGAGCTACCTGCTTCTACAGTCTTGCAAGTGGCGGCTGGCCGGCTGCAGTGCAGCTGTCAGATTCTTCATT  
ACGGCCTTGCTTAGATTCCAAATTTATCCCAATTTTACTATGCAAAAAAGAGATTTCCTATCACATCAAAATGTGCGGCACAT  
ATATGGAGTACTAAATGTAGATGAAATCAAAAACTAATTGACAGATTTTGTGTACTTTGCGAGACGAATATTTAAAGCTAAT  
TAATCAATATTTAGACAATTATTATCAAAATAAAAAACAAATTGCTACAGTGTGACAGGACATTTACTATACAAAGTTTGGATCC  
CAAATTTGGATCTAAACAAGGCTTACATGAACAATAGAGGTTGTATGCTTGTGTAGCAGTAGCGACAATATTGCTGTGACAA  
GTACATCCAGCTCATACAATATTTTCTCTCTAAACAAAACAAGTACTTTATATATCTGTTTTTTTTAAAAAAGATTACAA  
AATATTAGTCCGCAAAACAGAAAAATCCGTTGTTTATGTAGAAAAATCATATGGCCCTCTTTCATAAGATAAGGTATATCTCATAT  
TTCAAGGAGTAACTAATTCTAAATTTAAGTAGATTATAGAAAAAGTAGTGTTAACATTTGTATATCTAAATTTGTTTACTATAA  
AAACATATGGAATGGCTAAACTAATAATGTTTATGTGATATTAACAATATTAGTGGGTATATATAGTCAAAATTAATAATTTA  
CTACCGAAATTCGAGATACGGAACGAGGGGAGGAAGTTTTGTGCGCTCCAGGATCCGAGCTCGAGCTGTAGAAAGCTA  
ATCGATTCCAACCGTTCGATTAAAGCTGTTGATCGGTGAGTACTACTACTCTAATGGGTCCTGTTTGGGGGCCCCACC  
AAACGTAGCCTCGGGTGCTGGCCTCGGCTGGCGCGCGGGGCGCAGCAGCTCGCAGAGTCGCAGTGCTCCGTGCTCCCAAT  
TAAATATACTCCCAAGAATTCGGCAGCGCGAGTGAAGAATTAACAGGAAAAACCGGAAAAACCGGAGAAAAATCCGAGTACTG  
ATTGCTGAAGCCAAAAGCGGGGATCTTTTGAAGCGTGAAGAGCAGCTTCTTGGCAGCCATAGTTGTGATCCGATCCGGTAC  
CGGCCGGAATGGCCGGAATGCCTCGTACCGGCCCTCTAAACCGGAATAGAAGAGCTCCAATCCCGTACCGGGTCAAAATACCG  
GTCAATACCGGTCAACGCCGGTCAATACCGGTCAATACCGGCCAATACCGGCCAATACCGGGTCAAAATACCG  
GTCAATACCGCGCGGTGCTGATGTATATATTTTCCATGTATCAACTTTGGAGTTTAAACTTTGAAGTTAAGTCTATGAAC  
TTGTTGAATGATATCTTAGTTTGGTAAAAATGTTAATTACGCCATAAGTTAAGTCAAAATATATTTATATATACATTTATGTATAA  
GTTTATTACATATTATATTATTATAAAGTCCGGAATGGTACACCGGTATGGGCGGTACCGGAATGTTCCATTCCAATAG  
CAAAACGAAATGGGCTCCGGAATGGAATTTACAAGTTAGCTTGCAACTCCCATGGCCCTATAGAGAGAGAGAGGAGAGCG

AGCGAGCGGGAGAGATTGTGCAGTGTCTGTGGCCCTGTGAGAGAGAGGACCTGAGGAAGAGGGAGGAGGCTTGGTGGCGG  
AGCA

>SsLRR-RLK58

TAATAGCCGTATTTTATTTCTTATCAACCTTCTATGTAAGCACCTAGTCTATAATCAAGCAGGGTTAAGTAAAAGAAATCATTTCTTCATCTTTCAACTGCCAGTTCTTACTACGATGCCAGAGCGTAGTCAAGCCGTACCGTCACGCAGAAAACGGCGATTTCGCGAA  
TCAATATGCCAGCTGGGTGCCCCGAAAAACACACGCCTTACTCGTACCCCGGACACAAGCAAGGTCAACCCGTTCCACTCC  
TGTCAGGGGTCAGGTCGCCGTCCCAAGCTCGGACTCTAAGCCCCAACACTGTAGGCCCGGCCTCAGTATGGTGCTTAGA  
CCTCCTCAACCAATATATAGGACCACCTAAAAAGCCAGTCCGGAAAGAGCCAGAACCCTATGACAAGAGGGGAAACAAAGTC  
TTCCCGCCCCATAAGTAAGTATATGCTCGGGATAATAAATCTGTGACTTGACCAGGGTCCATGCAACGAACGGTCTTAAATT  
GACATAGGCGGAACAAATGCAACTAGAGCCCTGCTCTATTGCCAACACAGGTCCAAGTCCATCCAACCCGTTCCGCTCGGTC  
TCCAATTATCCACATATATTTATTTTCCATGTGATAGTAACATGATAATAGTAACAATATTATAATCCCTATCTCTCGGAGTGAC  
AGGTAATCACTCGACTTCTACCGGAATCCTATAGCATAGCACACTACACGATCCTATCATACTAGTAAGACTTATAGGATATTAT  
ATATATATATATATATATATAAGTGGGTTTCATTTAACTCTTTTAACTTAATGCACAAGCATAATTTAAAGTGCAGAGAA  
TAGGGGTTATGCACCGGGGCTTGCTGGGTAGAAAATAACAAATTGGCATTCCATCATGGTGAACAAATCAAGGCTCATATN  
NNNNNNNNNNNNNNNNNNNNNNNNNNNNNNNNNNNNNNNNNNNNNNNNNNNNNNNNNNNNNNNNNNNNNNNNNNNNNNNN  
NNNNNNNNNNNNNNNNNNNNCGAAATTCGAGATACGGAACGAGGGGAGGAAGTTTTTGTGCGCTCCAGGATCCGAG  
CTGCAGAATCCTAGAAGCTAATCGATTCCAACCGTTTCGATTTCGAATTTAAAGCTGTTGATCGGTACGTACTACTCTAATGGTCC  
CTGGTTTGGCGGGCCCCACAAACGTAGCCTCGGGTGTGGCTCGGCTGGCGCGCCGGGCGCAGCAGCTCGCAGAGTTCG  
CAGTGCTCCGCTGCTCCCAATTAATAATATACCTCCAAAGAATTTCGGCAGCGCCGAGTGAAGAATTAATAAACAGGGAAAAAC  
CCGAGAAAATCGAGTGTACTGATTGCTGAAGCCAAAAGGCGGGATCTTTTTAGCCGTGAAAGCAGCTTCTTTCGACCATAG  
TTGTGAATTCCTATTCCGGTACCGGCCGAATGGCCGGAATCGTACCGGCCCTTAAACCGGAATAGCAAGTAAAGTCTCATATN  
CCGTACCGGGTCAAATACCGGTCAATACCGGTCAACGCCGGTCAATACCGGTCAAATACCGGTCAAATACCGGCCAATACCGG  
CCAATACCGGTCAAATACCGGTCAATACCGGCCGTGGCTGCATGTATTATATTTTTCCATGTATGAACCTTTGGAGTTTAAACTT  
TGAAAATAAGGCTTTATGAACCTTGTGAATGATATCTTAGTTTGGTAAAAATGTTAATTACGCCATAAGTTAAGTCAAAATATATT  
TATATATACATTTATGTATAAGTTTATTTACATATTATTATTATTATTATAAAGTCCGGAATGGTACACCGGTATGGCCGGTACCG  
GAATGTTCCATTCCAATAGCCAAAACGAAATGGGCTCCGGAATGGAATTTACAAGTTAGCTTGCAACTCCCATTGGCCCTATAG  
AGAGAGAGAGGAGAGCGAGCGGGAGAGATTGTGCAGTGTCTGTGGCCCTGTGAGAGAGAGGACCTGAGGAAGAGG  
GAGGAGGCTTGGTGGCGGAGCAA

>SsLRR-RLK59

TGTGAAATATTTTCAAGAATTTTGCCTGAGAATTGACAATAGCATTACTGAATCTGTACATATGCATTACTGAACCTGTATGTA  
CATATGCATCACTGAAAATTGACAGTAATAGTTTCACTGTCTACTGTTGACCTGTATGTATGATAGGGAGGCTAATATCCATG  
TATGTCAAGCAGCAACCATTTGAGTTGATAACTAGGAGAAGCAAGTATGACAATATCATTACTGAACCTGTGAACACCATTTGC  
TGACAATATCATTACTGAACCTGAGAACACTATTGCTGACAATATCATTACTGAACCTGAGAACACCATTTGCTTGACCATAGA  
ATTTCTGAGAAACAATTTATGACAATATCATCATTGAAACTGAGAATAGCAGGACACTAAGAAAATGATTTTCAGCTTGTTT  
AAGTTTACAAGCATTACAGGCATCTAGAAAATAGATCATACAGGCCATCTAGTTCCAGGTCCCTACATCCACTCAAACTCC  
ACATCCAGAAACAATACAAAAGAAGCCTAAGGCCCTACATCTTAGTCCATAGTTTCACAGGCAATGTACATTCAAGTTACATTT  
CCAGCGCATCAAGCATCCGCAAAATAGGCCATCACAGGCATCGCTCACAAATTCAGTCCATCACAGGCATCTCTCAACCAT  
CGAGTTGACTGGCTTATATACAAAAGAAAGGTACACAAAATCTTGAATGTACCATCAGGTTTACCATCTCTCCAAACC  
ATCATCAGCTGTGCAATCTGTCTCTTCTGTACATGCAATTTTTTCCAGTAAATAACAGTAAATAATTGACTTAAAGCATAATT  
GAACTAAAATGCATATAACAGTAAATAATTCAAAGGAAAGGTAACCTTTTCTTGTGTAGCAGTTTACCATCTCTCCAAAC  
CATCTCAAGCTTGCATGCTTTTTGAAAATGTACAGTAGCGGTTATAGCAGCACTATTGGGTTGATTAGACATGCTAACAACTG  
GCTCTAACTGAACATCTGCATCAGTATGAGGAACCCACACAGAGAGGCTCCAGTGCATCAAACTCAGGTTCCACACAACCTG  
TATGTAAGATTTTCTACCAGACAAGTCTTTGGAAGCGAAACCTTCAACTTTAACCTCTAGCATAAACATTCATCCCTACCGT  
GCTAGTAAATCGAATCCAAATCAAAGTGTATACATGCAATACATCGAAATTTCCAAGCAAAATCAACACTAATCCCCAACT  
GTGATGACCACACAGAGAAAATTAGGAGGAAAAGGTACTGCTAGCGCCGCTCCCAATTGCTGCCGACCAAGTGCAGC  
AGGAGGCACGAACAAAGCCGATGTACCATCAAGGCGCCTCCATCACCTCCAGTAGACGCGCACCAAGTGGGTAGGGTCTCC  
AATCGCCGTTGCCAGCCTCCAAACGCCACTGCCCAGTCCAATCGCTGCACCTCACCTGCTAGGGTTCTGCTAGGGAGAA  
AGGGGAAGAACATGGGGAGGGAGAGAGAATAACGGGGCAGGCCAGCTTCACTTACCTTATCTGATTGTAACAAGGGGCA  
ATATGGGCCAAGAAACAATAACAGGACCTGCAAGTGGGGCCACGACGTAGCATACGTAGAACAGGGGCAAGTGAAGTGA  
GGAGCAGAATAGTAATGGCAATTTTCCAATAACGTGAATTATAATGGCGTTTTTCAAAAAGTTGAAAAATTATAATGGCGAGAA  
TCAAAAATCCCATTAATAAATATACTCCCAAAGAAATTCGGCAGCGCCGAGTGAAGAATTAATAAACAGGGGAAACCCGAGA  
AAATCGAGTGTACTGATTACTGAAGCCAAAAGGCGGGATCTTTTAGCCGTGAAAGCAGCTTTCTTGCAACTCCCATTGGCCC  
TATAAGGCAGAGAGAGAGAGAGGAGGATTTGCTGTGCTGTGGCCCTGTGAGAGAGAGGACCTGAGGAAGAGG  
AAGAGGAGGAGGCTTGGCGGGGAGCAA

>SsLRR-RLK12

ACATCAATTTTAAACCGCTTGCATGGAGTATTAAATGTAGGTAAAAAAATAACTAATTACACAGTTTAGTTGGAAATCACGA  
GATGAATCTTTTGAAGCTAGTTGGTCCACGATTGGACAATATTTGTCAAATAAGACGAAAGTGGTACTATTATCAGGTTGCA  
AAAATTTGCAATCTGAACGAGGCCCTAGTAGAAGCTAATCGATTCCAACCGTTCGATTTAAAGCTGTTGATCGGTCACTACTC  
TAATGGGTCCCTGGTTTGGGGCCCCCACCACAAACGTAGCCTCGGGTGCCGGCCTCGGCTGGCGCGCCGGGCGCAGCAGCT  
CGCAGAGTCCGAGTGTCTGCTGCTCCCAATTAATAATATACTCCAAAGAAATTCGGCAGCGCCGAGTGAAGAATTAATAAACAGGGGAAACCCGAGA  
AGGGAAAACCCGAGAAAATCGAGTGTACTGATTACTGAAGCCAAAAGGCGGGATCTTTTAGCCGTGAAAGCAGCTTTCTT  
GCAACTCCCATTGGCCCTATAAGGCAGAGAGAGAGAGAGCGAGCGAGCGGGAGAGATTGTGCTGTGCTGTGGCCCTGTGAG  
AGAGAGGACCTGAGGAAGAGGGAGGAGGCTTGGTGGGGAGCAATGGCGACGCGCGCCTGGGCGCTTGGCTGCTCGTC  
CTCATGTGCTTCGTCGCTTGGACCCCGCGGCAATCTTGGTCGCGCGGCCACCGACGCGAATGATGGTGGGTGATACACTG  
AATCTTGCCCTGTTTCTGATAGCATTTCTGCCATCCCTTATGTCCTTCTCATGTTTCTGTTTGTGTCGCGGCTTCCTTCTATGG  
CCGCCCTGGATTGATTGGGCCAGGGGCTCGGGATTTTGTCTTGGCGCGCATTTGGGTGTATGGGTTACGTAGGTTTGGTTG  
CTGCTCTGGTTGTCCCTTCTTTGAATGCTTGTGTCGTCGCCACCATCTGCATCGCCTCTGCTTGGTTTGGGATTATGTGGAGACT  
CGTTCTGTTCTGCAGGTTCTGAATCTCGTGTGTTGGGTGGGGTGGTCAAATCAAACACTAGTTACTTCTTGTAAATGGCGTC  
TTCGACAGATTGGGGACCTGGGAGGCATGAGGGGAACCGCGAGCTGTTTCCCAACTCTTCAGCTGATGACTACCAACTCC  
AGTCACTCTGTTGATCTATTCTTGGCTGCTAATTTTCAGGAGCAAGGACCTGCATGCTCTGTGGGAAATATGATCAT  
CTCTTGGAGCATCTCCAGTAATACTACATAAACTATTCTATTCAAATTCGTTTAAAGCAGTCAATGACGCGTGGGGTTCTTTTGG  
CATCTCTTTTCATCTAGATTTTGCACGGTGGAGAGTAGGGGCCAGCAGAAAGTAGAGGATGGAGGGGAAAAAATAGGAGCGAA  
CAAAATCGGGTCTAGTATTTACAACTCCTATTGGAGTTGGGTTTTTTTTTTTTTTTTTTTTTGGCTCCGCTACTCAAA  
TCTGAAGCACAGGCTCTGTTGCAGATCTTACCTCTCTGTAGTCTGAGCCAAATCTTGATGTTTGGTTTCTGCTTAC  
TTCTGCTGTTCTAAATACAGATTAGGTGGAGAAAATGAGAGGATTATGGCATATGAACATGTGTCTGGAATTACTACTGACTG  
GATTGGAAATTGTAGTTTAAAGGAATGAAATGTCAGCTCTGTAGCAATGGACCCCTTACCAGCTTCTGAGCTTATTTCTGGCC  
TCAAAGTGTGATCCAAATTTCTATTGTCAACATTACAATTAACAATTTTACAACATGGATCTGTGATCTGATCAACAGCAA  
ATTAGATTGGTTTTACTACGTGTTTCTGTGATTATGTCGTTTGTCCACATTATACCATTGGTCCAACCTTCCATTCCATGTAATC  
ATAGTAACCTGGACTTTATTAGTGGTCCGCCAACTCAATGTAACGATTCTTCTCTTCTGACATGCAGTTACTGCCCTCAAC  
ACGCTGTTTACCAGTA

>SsLRR-RLK36

TTATATAATAAAATAAACAATTTATGATACCAACTAATCAGATTCTTCATTAATTATTTTTTAGTATATCTATTTGATGTCATAAAAT  
CTTTGTAATTTTCTCTGTAATTTTAGTCAAACTCAAGATTCTCAGGAATGATTATAATTTGGAATAGAGGGGAGTAATAGACAC  
CGTTATTTGATCTAGCTGTAAATTTTCTAGAGCCGCTAACTCTGATGTTAGAACATGTTTATTCTTTTACTCTATATAGATGGT  
GCAGTCTACACTCATCGTTGTTTATGTCTACTACTTGTATTGATTTTTTTTACAAAATTAATTCATGGCATGCATACAATTCT  
CTACATAGCCGATATTATCAACTCCTTAAACCCATATCCAATCCGATTCCGCTCCCAGTACCAGTTCTAACGTCGGAATAAAAA  
TCTATATTACACCTGCCTGCTGTAATACCCACTCCGACCGAATTCGATAAAAGAAAAAGTGGATTAGAATACGAGAGATGCA  
TTATCCGTTCTAATCCGATTGCTTTTCATCCATATCTAACAGTGTAAACTAGCTTTTGTGGAATTTGTGGTAATCAAATTCAGG  
TGGGGATAGTTCGTCCACCATTGATCTCTAAACAAAAAGTTGCATAACCGATCACATTTTTTTTATAAGAGATCATTGTTACAT  
AGCTTAGCCCCATTATTTAAACCTTTGAGATAACCCGTGCGGTAAACAAAGCCACGTGTTCACTTTTCCGAGTCCCAGCAGTAG  
CAGCCCGTGTATAACCGGGTCACTCACCCATATTTTTAACTATCCCCACCTGAATTTGATTAGGGCTTCTTCAACGCAGACC  
AACAATCTTGTGGCTTCGACCATAAAGATCAGTCCACGGGGGCACAAATTTCTAGAGCTACTAAAATCCACAACGCAAAAGT  
TATACTCTCCGCTCTCTCTGTTGCTTTATCCACGGGCAAAAAACAGACATCTTTTGAAGAAAGTGCAGTCTTCAGTACCTA  
GCATGCGCCTCAGCTTGCTACAACGCGGTCTCTCGTTGATGCTTGGCTCTTTTGTCAAGTGAAGACATGACTGCTTCTGCAA  
GCGTCACTGACCGACTGCGAGCTATCAGTTGGTGTGATGGAACATCACTGCCGAGTTGGACAATGGGGCAGCAGCGTATG  
GTGTAGCGTTGGGGAAGCCCTTAGGTATCTGAGAGCTGTACTACACAACAAAGAACAGAACAAAGCACCAGCCATCGTG  
CTGACAGTACAGAATCTGCGGGTTCGTGGACAGTATCTGCTGCTTCTGCTTATTCCTTTTGGCTGTCAAGTGGCTTAACACAAAC  
AGGGGCCAAAATCTCTGCCACTGACCACAGCTCAGGCTGCCAACTGCCAAGGCATCTTGCCACGTTATTCCCTCGCAAG  
GACTCCAAAATAGCCAGGGACATAATCCCATGTTCACTGTTAATGAACGACCCCTGTCTCTGCTCCATCCCCAATAATTGCCTG  
TTGATTGCTCTTGATGACCTACAGCAGTAGGAGTACTAGCATAGCATTCTCAATGATAAAGGAAGAGATTGATTGGGATT  
TTTTTCCAAAACAAAAAATTCGGAATTTCTATAAAATGAATTGATTGGGATTTTTTCCCGGAATTTTGAACGTTGCTGACC  
TCCCGGGCGAAGCGAATCAGAGGATGCCCATGCCCTCACACTGACAGGGATGCTAGCAAGCAATTGACCTCACTCTCA  
CCCGGGTCTGTGCCGGCGCTCTGCTGCCAGCTGCTGCCGTGCTAGCTTCCAATGCGCGGACACGCGATTCACTCATATCC  
GTCTTGAAAAGCGCAGCGTATCTGTAAAAACAGCGGTAAACCAAGTCCGATTTCGAGGAGCTGCAATAAACGAAGAGG  
AACTCTCCCGGTCCCGGCCCGGCCAAAAAGCACTTTCTCTCGCTCCCGTCAGGGAGGGAGGGGAGCATTGCTGT  
GCGGG

>SsLRR-RLK25

ATACGCTTGTTTTAGTTTGCTCAAAGTTTCCAAAGTTTTTCACTCTCTCTCCATCACATCAATTTTAAACCGCTTGATGGAGT  
ATTAAATGTAGGTACAAAAATAACTAATTATACAGTTTAGTTGGAAATCAGGATGAATCTTTTGAGCCTAGTTGGTCCAT  
GATTGGACAATATTGGCAAATAAGACGAAAGTGGTACTATTATCGGGTTGAAATTTTCTCAATCTAAACAAGGGTTAAAA  
ACGTCCGTGAAACAAGTCTTTCCAAAGGGCACTTCTGTCGTCTCTGATTACCTCGCTGACGCTAACAGATTGTGGACGTACT  
ATTATATATAAACGCGGGAGCGCGCAGAGGGAACGCGAGGAGAAAAACAAACACACACCGCTCACACTGACAAAACAAACAG  
GGGAGAGCGGACAGAGGAAGGGAGAAAAAGGGCAGTGAACAGAGGCAGATAACTTTTATTTCTTTTCCCCCATTCACCTTC  
TTCTTTTCTTGGATACTCATACTCCAGGGGAGAATGTCTCCATGCTTAAAGCGAGAGCCAGTGAAGTGGCGAGCAGCTCCA  
GGCATGGCGTTGGGCGTGCGCGGAGTGGCGGCGCTACTCTGTCTCCGTCTTACCAGGGGCCACCGCCGACACCAACTCC  
GACGACGGTTAGCGATTCACTGTTCCCTAGTTCTCCATCTCTCTCACTGAAGCGTATGTTCACTTTAGCATGCCAACAAAC  
CTTTGCCCTTGTCTGATGCTCCTTCTCTCAGTCTGCGCTCAGAGTGTCTAGAGTACCAATGGAAAAAATCTGCTTCT  
GACCTATTCTGCTCAGGCTTGTTCAGTTCCCAATTCTCTCCATAAATTTCACTATGCAAAAAAGAAAGTATCCCTGACATC  
AAAATGTGGCAAAATATAGAACTAAATGTTGATGAAATCAAAAACTAATTGTACAGTTTGTGTACTTTGCGAGACGA  
ACATTTTAAAGCCTAGTTAGTCAAAAATTTGGATAATTTTACCAAATACAAACGAAATGCTACAGGAATCTGATACAGTGT  
TCTCCCCAATTCTCTCATCTAAACAAGGCCTCATTACAAGTGGTTTGGAGGCAGTAGCAGTATTGTGCACAGACATTA  
CTGTTCTATCTCATATGCGAGTATGCCACTGACGTTTCTGCTACTGTTCTGTTCTGATAAACCCTCCCTTCTTGTCTACGGA  
GGGAAATCAGGTCATTTCTAGTTTCTACTATAGTTTCTGAAATCACTGTGACGACTTCTTTATCCAGCCTTGGGCCCAGGGG  
AATGCCAAATGTGCTGACCTGTTCACTGTTCTGCTCTCTGATGTTTCTCCGATTATTTCTTTGACTTTCCGCTTCAGAA  
CCGAAATCTATAGGCTTAAAGTTTCAATTAAGCTTCGAGTATGCGAATTTGGTCTTGGACTCATACATGATGTCACAGGTT  
TGGCCGAGTGATTCTCCATTTTGTCTCGGCGGTTTAGTAGCTTTGTTTGTCTTCCGGCTAATCCGGAAGAAAAAGAAACAT  
GCCCAATTGTTAATCTGTTCTATGGTTCTTCTTTTGTCTATACCTAATAATAAATAAATTTATGCACACCGGGATGCGAATGTT  
GTGGTTATTCATTCAGGCACCTTTTTTTTATTGGATTGCTTAAAAAGTTAGGTTTCATGGTACTGCAAGTAGGACTGCTACCTT  
TGACTTCAGGCTAGTATGTTGGAGATTTTGGAGTCTCAGATGATGGGAAAAATACAGCTAGGATACTAGTATTTGTTCT  
CTTTACTTTTTTTTGAAGGAAAAACCTAATATTAATTTTCATATTCATTGTCAAGAGGCTGTACTGTTGATTGCTGAAAGCTG  
ACAACCTGTTGACGAATAAACACTCATCATGTTATTTCCACCCTAATTATTGTTGTCACGCTATCTGAGTTGATGTTCTGCT  
ACTCAG

>SsLRR-RLK48

GTCACGCACAACACAAGCAACAAACGCAAAATCTGACTGATGCATCTGCTCTGTTTTTTCGTCATCACAACATCGTGTCT  
CGCCTCAGGTGCGCGGAAGGCATTCGTTCTACAGGCTACATGTAGTAGTAGTACACTCCATTGGCTATACCAATCTTGCTATT  
GGGACGTACCCGGTCCGTGTCGCTCCGACATGATCCAGCCGACGAGAGAATCATCCATCCCACTCCACACCGCC  
GGCCTCCATCTCCATGTGTAGCAGTGACAATGCGCGCACAGTGTGACAGCATAGGGCATAGGGGAAAGATGTGCGAGCCGC  
ATTCCAAAATTACTACGCGCTCCCTGTTTTGTTTTAGAGCTTGTGTTAGTTGCTGTTTATGTATGGATTATAGAAGCTTTTCT  
GTCCTCTTACCTTAAATGAGCGAGCTCGATGGCGATGGAATAAATTTCCAAATATATTCTAAATGAACAGACTGTA  
CTTTTGGAAAGCAGTAATACTACTAGTTAAAAACGTCCGTGAAACAAGTCCCTTTCCAAGGGCACTTGTCTGCTCTGATT  
ACCTCGCTGACGCTGACAAGATTGTGGACGTATATATAAACGCGGGAGCGCGCAGAGGGAAAGCGAGGAGAAAAACAAAC  
ACACACTGTCACACTGACAAAACAAACAGGGGAGAGCGGACAGAGGAAGGGAGCAAGGGCAGTGAACAGAGGCAGATA  
ACTTTTATTTCTTTTCCCTTACCTTCTTCTTTCTTGGATACTCACTCCAGGGGAGAATGTCTCCTTAAAG  
CGAGAGCCAGTGAGTGGGAGCAGCTCCAGGCATGGCGTTGGGCGTGGCCGAGTGGCGGCGCTACTCTTGCTCTCCGTCT  
TCACCGGGGCCACCGCCGACCAACTCCGACGACGGTTAGCGATTCAATGTTCCCTAGTTCTCCATCTCTCTTAACTGA  
AGCGTATGTTCCGTTAGCATGCCAAGAACTACCTTTGCCCCCTGTTGCTGATGCTCCTTCTCAGTCTGCCGTGAG  
ACTGCTAGAGTACCAATGGAAAAAATCTGCTTCTGACCAATTCGTCTCATTACAAGTGGTTTGGAGGCAGTAGCAGTACTGT  
GCACAGACATCACTATCGTTCTATCTCATATGCGAGTATGCCACAAACGTTTCTGCTACTGCTGTTCTGATAACCTCCCT  
TCCTTTGCTACGGACTGGGGAATCACGGTCAATTTCTAGTTTTTACTATAGTTTCTGAAATCACTGTGACGACTCTTTATCCA  
GCCTTGGGCGCAGGGGAATGCCAAATGCTGACCTGTTCACTGTTCTGCTTCTGCTGATGTTCTTTCCGATTATTTTGTGACT  
TTTCCGCTTCAGAAGGCCGAAATCTATAGGCTTAAAGTTTCAATTAAGCTTCGGATGATTGAGAATTTGGTCTTGGACTGATAC  
ATACAGTGTACAGGTTTGGCCGAGTGATTCTCCATTTGTCTCGGCGGTTAGTAGCTTTGTTGTCTATCCGGCTAATCC  
GGAAGAAAAAGAAATGCCCCAATTGTTAATCTGTTCTATGGTTCTTCTCTTTGTCATGCCTAATAAAAAAATTTATGCAC  
ACCGGATGCGAATGTTGTGGTTATTCATTAAGGCACTTTTATTGGATTGCTTAAAAAGTATGCTTATGGTCTATGGTCTGCA  
AGTAGGACTGTACCTTTGACTTCAGAGTAGTATGCTTGGAGATTTTGGAGTCTCAGATGATGGAAAAATACAGCTAGGAT  
AATACTAGTATTAGTTCCCTTTACTTTTTTTTGAAGGAAAAACCTAATATTAATTTTCATATTCATTGTCAAGAGGCTGTACTGT  
TGATTGCTGAAAGCTGACAACCTGTTGACGAATAAACACTCATCATGGTATTTCCACCCTAATTATTGTTGTACCGCTGTCTG  
AGTTGATGTTTCTGC

>SsLRR-RLK422

TTGTCCAGCTTTCATATGTTGACAGGTTATATGTCGTTGGCATTCTTCTTGGTGCTGCATAATGGGTCTGGTTCGATCGCTAGT

CTTTTCCAACGTTAAATAACTGCACATTCATGTGCTGCATTTGGTTGACCATAATTTGCGCTCCCATTCAGTTGCGCGTTGCT  
ATCTGGTGAGCTGAACGGTGAAAACCCAGGCGCCCATTCGGGTGATTCCGTCGCCGTCGATCCTTCCGTTTTCTGTCATTTTC  
TTTCTTTTCGTTGTCAGTAGTTGCGACGTGGCTTTTCAAGCAGCAACGGTAGTGTGCGTCTCAGCGTGATCATATCGCCCCG  
TCAAGTAGGTGAGCGGTGAGCCTCGTCGGCTCGTCACTCCGCTGCCCCAGTCGTCCAGCCCCCTCAGGCCCTACCGCAAAGA  
ACCCAATGATTTCGCGCGTCGTCGTCACATCACTGTAGAGTGTGTTTCTCAAAAAAAAAAAAAAAAAAAAAACAGGAG  
CGTGGAGTGTGGACTACTGGACTGTGTGGTCACTGGTCAGGCAGGCATCATGGTCATGGGCATGGCGTCCCATCCGAATCC  
TGGATCATGGCTTGAGCCTTGTGCGTTGATGATGCGTTGGCCGCCGAGCGATTCTCCCTTTCCGTACGTGCCCAAGGCCG  
GCGACACCCGGCCGGCCATGATGTGAGACTTTGGAGACCGCCGAGCGCCGACAAAACAGACGCGCGGACGGAATGAATGA  
GTTACAGCTGTAAAACCTGGCTGCTAGCGCACCCAATCGAGAGTAAACGACGCCGGAACGCGAGGGAACGCCACATGCCGTG  
GCTGGCCGCGCACCCGCTGTGGATCAGCGTGGCCGATCGCGGGGCGAACTGGGGAGTGGCCGAATGGCCCGCGGGCAGCTG  
GCTCATCCGGGCGGCCGCAACGGTAATAGCCAGTACTATCTACATAGTTAGCTAACGTGGAGGTGAAAGAAAAGAAATATAA  
TTATTTAAAATTATTGGACCCATATGCTCCTCTTAAATGATCTTGGAGTACGTGAAATAGATTACTCTTTTTCTACTTTTTGCTT  
ACCATATCATATCTAGCTAACCTATAGTTAGTTGTTGGAGACGCTCTTACACGGGCACAGTGACAGTGACAGGACAAACCGGA  
AGCTCGCTTTGTTGGCGCTGCTTCTTTCTCGAGTGCTTTGGCAAGTGGCTCCTTGTCTTGGGTAGCTGCTCCCTGGGAGG  
TGGGCCAATCTGTACGGGCGAGCGGGGCCACCGCGCAGGGGAGGTGGCCACCCAAGTACGGGCGCTCGATTACCCTGC  
TTACGCTTATCATTAAAGCGCGAGATGATTGGTGCACCGGGCTTAAAGAGTGGCGCTCAGATTTCCCTCGGCACATGCCATGTC  
TAGCAGGACGTTACAGAGTTGCCATCACTTGTGCTGATGTATGGCCAACTTTTCAGCGCGCTAGTATTGTAGAGAGCTGCT  
ATAAAAGCAGACTGATCGAATCGAGTTTGTATTATGCAGGAGTACTCCGTAGTAGGGAGGTGCTCAAGTGCAGTACCAACTA  
CCAACATGTTCCAGACAGAAGGTGAGGTGAAGTCAAACTCATCTGGATCTTTTAGACAGCAACTAGACGTTTGAACGTACA  
CTATCTGTTACAGTACTGCTAGCTTGTATGATTAATTGCGTTCGCTGTTTCGTTTCGATCATATCAGCTATCCACTACGACTACT  
TTTTAAACCAACGAGAGCTGTTTTTTTACTACAGCAAAATCAGAAACAGTACCTTAAACCGGTGACTTTTCGGCCAAACGAAC  
TGGGCGCGAAGAAGAGGTGTGCGTTTGCCTTTGCCCCCATGATGAACAAGAAACCACCTTTTGGGGGTGCTGGAGCCTGG  
AGCGGGCCCTGCATGCTTGACTAATGGTTTTCTGATGTTCCACCCAACGAATACTAATCAATATATCCGGCACCCGTCATTCC  
GATCGCCCACTTTTTCGAGTTGTTAG

>SsLRR-RLK205

TAATTCTCTCTCTCAGCACTAGAACTACTACATTAATGTCTGTGAGAGAGCACGCCTTATATCATGGGATATGAATAAAAAAGTG  
GTTACGCTTATATCTTAGGACGGAGTACTATTTACCAAGTTGTAAACGGGCAGCTCAGATCAGATACTAGCTGTAGTATTTTAC  
CTAGTGGTGTATTAGTCAACGCCCAACTTGCCGTTTCGGCTTGACCCATGCATCATATGCCAAACCAACGAGAAACAGGATTT  
GGAATTCAGAAGGAAGACAAATGTCCTGAGCATGACCGTTAGCCTCACCTCTCAACCTTTTATTTCTCTCTTTCACCAAACCT  
GTCAACCATTTCAATCTGGTGATTGGCGGGGGGTAGCACAGCTGCAGGTTTGCAGTACTAGGCCATTATTTCAAACCTTTCCAA  
GGTAGCTGATGTACATGTAACGAACCTGCTATACGGAGTATGCTATAGCTACCTGTACCTGGATCTGGAATCTTAAATATAAGCT  
ATTAATCAGCATGCATGCCACATTTCCACAAGACAAAAGGGGACGCGTCCCTGGTTCTAGAATTGTTTCGTGCAAAAAGGGA  
ACGAACGCGCTGTAACGTAACCTTTATCAGATCTACTATGTTCTGTCGCCCTGTTTCGGCTGAGCTTATCAGCACGGCTTATCAG  
CCGTGAAACAGTGTTTTTCTCTCACAGCAAAACAGTCACAGCCGGCTTATAAATCAAAAAAACAGTCTGCCGAACAGGAC  
GATGCTTCTACGCAATTCAGCAATTTAAAAATCTTAAAGGAATGAGCACTAGCTAGATTAGAGGCATGAAACTATGCGAA  
GTTAGAATCTAGTAAAGTGTGTTTCAGGTGAGGAGGAAGATGGAACATGCAATGCAATGGTGAACCTTGTGTCTTGTCTCA  
GTCAAAACAGGCTCATGTTTGGTTGACTGTACTGGTACAACCTTGGTTACAGTCCACCATTAGCAAAAAGCATCAATCAG  
CATACTCCCTTCCCATGCTGGTGGCCTCTGCAGGCTCTGCTCGGACTTCATCACCTTTCACCTTTCACCTACTCCCATCCCT  
AATTTACCGGATCAAAAAGCACCTTCGTTCTCTGTCATCGAGGAGAGACAAAAGTGTGTGTGTGACAGTGGCTGTGTTAGGTA  
GCCTTAGTTGCCAAAAATTTGGCAAAATGGCAGCTGAGTTACTTTTCGTTGTTATTAGCAATTAGTGTCCAATTATGATCTAA  
TTAGGCTTAAAGATTCTCTCGTCCATTTTCGTCTAACTGTGTAATTAGTTTTATTTTTATCTATATTGATGCTTTATACATG  
TGTCTAAAGATTTCGATGTAGCAGGAATCTGAAAAATTTTGTAAAAATTTCTGAAAACTAAACAGCCCTTACTTCTTAA  
AAAATACTGTGCAGAAAAAAGATTCCCGTCACTTAACTTGTGATACATGCATGGAGTACTAAATGTAAATGAAATCAAA  
AACTAATTGTACAGCTTGGTTGTATTTCGCGAGACGAACCTTTGAACCTAATTAGTCAACAATTAGACACTATTACAAAT  
AAAACCAAAACGTCATGATTTTTTTTACACCTTTTCGCTGCTTAAACACAGCCAGCGAAGAGCGAGTCAAGAAC  
AGCAAGCAGCCAGAACCACAGACATTTAAGAGGGGGAGCTAAAAAAATTTGCAGTCTTTACCGGCTCCATCCCTACCC  
CGCCGATCCAAGCAGCCGTGGCATCCGCCGTTTCTGCGTGTCTTCTTCTGTTTACTAGCTGTACCCCTGGTAGT  
GAACCAGCGGAGAAGAGAAAGAGAGGCGAACCCCGTGGCGCGGTGCGGCCCATGGTGATCCCGTGTGACACCATG  
CCGTGCTCTCTGCTAGGGATATAAGCAACCGAGGAAGCAGCAATCTTTCGCTGCCGCGGAGAGAAGGGCCAAAGAGG  
AGTGTGTGTGGGACCAGGCC

>SsLRR-RLK229

CATATTTATCATCAGCCAGCCAGCACAGCGTCCGATCTACCTTCAATGTAACAAATCCCAACCACAAGTTGTGATGAA  
TCAATCACTCACCACATGCATACCTGCAGCCAGCAGGCAAGACCTGACTAGTTTAGGGCTAGCTCCTATGCCAGTACACATG  
TTCGTTAAGTGCCACGGGACACGCCGTGATCATGGATTAGGAACATAATAATAATATTATAAAATATTGCTCGGTTCTAGTACTAT  
TATTTACCAAGTTGTAACGGGCAGCTCAGATCAGATAGTAGCTGTAGTATTTACCTAGTGGTGTTTAGTCAACGCCCAACTTG  
CCGCTCGGCGGTGACCCATGCAATTATCTGCCAAACCAACAGCTAGGTTGGAAATTCAGAAGGAACAAATGTCCTGAG  
CATGACCGTTAGCCTCACCTCTCAACCTTTTCCCTGTTTCGGCTGAGCTTATCAGCCGTGGAACAGTGTTTTTCTCTCACAG  
CAAATCAGCCACAGCCGTTTATAAGCCAAAAACAGCCTGCCCGAACAGGGCCTTATTTTCTCTCTTTCACCAAACCTGTC  
AACCATTTCAATCTGGTGATTTCGGGGGTAGCACAGGTGCAGGTTTGTAGTACTAGGCCCTTGTTTAGATTGCAAAATTTT  
CAACTCTAGGTACTGTAGCACTTTTCGTTTGTATTTGGTAATTATGTTCCAATTGTGGACTAACTAGGTTTAAAGATTTCGTCT  
CGTGATTTACTACTAACTGTACAATTAATTATTTTTTACCAATATTAATGTTCCATACATACGTTCAAAAATTTGATGTGACG  
GAGAAAGAGTGAAAAAATTTGAAATTTGGAGACAATCTAAACATGGCCTAGGCCATTATTTCAACCTTTTCAAGGTAGCTGAT  
GTGACATGTAACGAACCTGCTATATGCTATAGTACCTGGATCTGGATCTTAAATATAAGCTTATTAATTAATCAGCATGCATGCC  
ACATTTCCACGAGACAAAAGGGGACGCGTCCCTGGTTCTAGAATTGTTTCGTGCAAAAAGGGAACGAACGCGTCTGAACGTA  
ACTTTATCAGATCTACTATGTTTCATGCCCTCATGGCATCCGCAATTTAAAAATACTTAAAGGAATGTAGCACTAGCTAGATTAG  
AGGCATGAACTAGTGGAAGTTAGAATAAAGTAAAGTGTGTTTCAGGTGAGGAAGAAGATGGAACATGCAATGCAATGGT  
GAGAACTTGTGTCTTGGCTCAGTCAAAACAACAGCTCATGGTTGGTTGACTGTACTGGTACAAAACCTTGGTTACAGTCCACC  
ATTAGCAAAAGCATCAATCAGGGTGTGTTCACTTCCCGTGCAAAACCAAAATATTTTTCTTTACCCATCACATCAAATCTT  
TGAACGCATGCATGGAGCATTAATGTAGGTAAAAAAGATAACTAATTGCATAGTTTATCTGTAAATGTGAGACAAATTTT  
TGAGCCTAGTTAGTTTTCATGATCAACAAATTTTGCCAAATAGAAGTAAACAACAAAAAATGCTACAGTAACTTTTCACTCCTT  
TCACCGACTGAACACACCCTCGGCATATCTTTCTGTGTTGGCCTCTGCAGGCTCCGCTCGTACTTCCGCTCGTTTAGTTC  
CCCGAATCGGGGGTGGCAAACTTACGCAGTGCCACCCTGAACACTGTAGCACTTTTGTTTTTTAGTAATAATTGTCCAAA  
TTTTGATTAATTAGGCTCAAAATGTTCTGCTCGCAGAGTATAACAAACTGTGCAATTAGTTTTGATTTCATCTACATTTAGT  
ACTCCATGCATATGCCGGCATTTTGATGTGATGGAGAATCTTCTTTTGCATAGTAGAATTTGGGAGTGGAATCTGGAATCTTAA  
ACAAGGCCCTCATCACCTTTCACCTACTCCCATTTGCTCCCCATTAATTTACCGGATCAAAAGCACCTTCTTCTGTCCATCG  
AGGAGAG

>SsLRR-RLK70

ATATGGTTTGGATTGTTGACCAGAAGTTGCTGAGGCTGCATGCTCTGAATCTCTGCCTACAGAAGGGCGAGCTGCTGCCTGA  
TCTCCGCCGCTGGGCGGATGTTGCAATGCTTGTGACTTGCAGCGTAGGCGGCAGCAACTTGTCTCTCTTGTCTGCATA  
GCTTGATGTTGGGCTTGGAGCTACTGTAGCTCTTGTCTAGGGGTAAGGCTAGGCGCTTGTGAACTTCGACGTTGGCTGCT



CGAGCCAGGACGAAGGGTCTCGCCATTTTGTGTTATGTACTGACCTCCTTGAGTCCTTGGCGCTGCTCTGTGTGCATGGGG  
AAGGACAAGGAGGGTAAGAGTATATATACATGCGTGCAAATGAGTGAAGAATTATTGGATGGGAAATAAAAGAACCAATG  
CCAATATGCCGACATTGAAACCTTTTAATTTGCAAATGGGTGTAATTTGAAATTTGCTTTTTTTTGGTAAATCCAAAAAAA  
GTTTGTATAGGATAAGCACAAGGTTTATATACAGATACACAGATTATTCATGAATTAAGTATCTGCTAGCTATGTATTGACG  
AAGTTTATCTTCTTATCATCGCGGAATTTTGTATCATGCATCTCGTCCGAATGAATCAAGTTGACTAGACTGCTTCTCATCCGT

TAAACAACCTATAATTCCGAATGGTTACAAGTAATTATTATTTCTTCTAACAAAATCTTAATATTTTCTACTATAAGCAAATCTC  
CAACAATAAAAATTTCAAAACATGGAACCAAAATTGAAAAACGTAGAAAAAGACAAAAATCTAAATCGGAAAGAAAAGACT  
GATCGGAACAAAAATTTGTTACATCGAAAAAGTGGGTTCTGAAGTGAATTAGTAGAGGTGGTCGAAATTTTATTTTAATG  
GTAGAAATTTTGCTCTTTAGTATTAGGTATACATACATACATAGATAGTCAATTCGGGCGGTGGGATTTCTCTGAGCGG  
CGGACGCCCTGTGCGCGCACCCCTCCGCGCACCCGATCCCTCCGCTGACAGGGCACAGGACAGCTCAGCGGCCAGCC  
ATCGCTCTGTGCTGCTGCTGCTGTGGCCACTGCCCCGCATTCAGGTCATATTTGGGCACATAACACTAAGTTTAGCTAG  
ACATATAAAAAAACCAATATTATTGGTACATAATAAGTATCATTAGACGTATATAAAATATATTTTCATAATAAATCTATT

AAAGATAAAAAATGTTGATTCTACCAACCTAGTTAACCTTAAAGAATGCTACACTTAGTCCAAACCTAGAATGACACTTTTTTCGG  
ATGGAGATAACATAATATAGGGAAAAATGTATCACACAATTCCTCCCATTAACAAGATATTCGGTGGATCATATCACGTCTTTGA  
CTTAAACACGTAAGGAAATTTATGCACACAAGTTAAGTACGTGAAGGGCTCTGCAAAATGGAAATGATTCAATCATAGATGGCTA  
TTGACAAAAATAAGGCTTGTCTCTTTTTTAAAAATAAAATACGTGCATGAGCGCGATAACGTGTGGATCACGAGAAATAGGAA  
ACATATGAATAGGAAAAGGGCAAGGCTATACATGAAAGCACACAATAGTCAAAAAGTTTCATTCTGATATTAAGAAGACATGT  
AAGATTTGCGAACGGATGGTGGGTCTTTGTGGTGGAACTGCCATCTGGATTCAAGTCCTCGACTTGGTACGTGTGCTC  
GTATTTTTCTAGATTATTTAAGGATTAAACGACACTATGCTTTTAGTGGTGGGCGAGCCTCTCTCTTGTAGTATGACTTCGTCG  
TGAATCTCAAGATCTGCCGGCTCAGTCCTCGAAGGTGCTCATAGAGGTAGGGTTTATATGCTTTTAGTGGTAGGCGACCTCT  
CTTTCGATAGTATGACTTCGTGAATCTCAAGATCTGCTGGCTCAGTCATTTCGGAGGTGCTCATGGAGGTAGGGTTTATTCTTA  
CAAAAAAAGAACACGTAAGATTAAATGGTACTCTATATGGGTAGGCAGTGACAGACATGAGTGAAAAAGGAGAAACGCTG  
CTTCCAACAACTCTAAGACTCCAAAACCTCCGAAGAAATTTACGGGTAGGCAGAGACAGACATGAGTGAAAAAGGAGAAAC  
GTTGCTTCCAACAACTCCGAAACTCCGAAGAAATTTACAGGATCAGCTTTGTTTAAAAAAAATCAGGATGACCTTAGACTAG  
TATCACAATTTGCCCTATAAGGACACCTGCAACAGTAAGAGCTAGTTACTGCCCTCAAGCCAACATCTCCAATAGTGCAACTT  
TTAGCAATGACTCTCAGTATGATTACGTCTGCATAAATTTCTCACATGATCTTGGAAATATGTGTAAGAGCTTAGCTAGCTTTTC  
TCTTCTTGTATTAAAAATATGAAAGAAATATTTAGAGCTAGGTCAAAAAGTCAATTGTTGGAGCGCCCTAAGTAGTGTGTGAGA  
TGAGAAACTTTTTACAAAGATTTCTTTAAGTCAACTTCCTCCAAGCCGGGTGTTAGGAAGCCTTTCCAGTGTCCATTCTGTTT  
GATTGGACTTCTTGAGCATTCTCCGTTTTTAGTACTTTCCAAAAGGGAGCCCTAAGTTATGGTTTGATTCTGATTGTTAAATC  
CGAGTCACCAA

>SsLRR-RLK80

TATCAGTTCCATCAGGTGCGTCCAAAACAATTTATAAGCCTGTGATACGTTACAGGATTAGCACTATCTTCAAACGGACTGAAT  
CGAGCTTCCACTTGAGGTTCCACTTGGACTGAATCGAGCGTCCAAAACGATTTCCTGAGGCTGTTATGTTTGGCACAAACGGT  
GCACGTATCTTGCACAAACACTTACACTGTCTCCAAACGGACTGAAGTATCCACATGACCCACGTACCTTAGGCGCTAC  
ATCTGGTGCATTCAAATGATTTTCGAGCCTATGGTATGTTCCGGCGCAAAACCGTACGTCTATCTTGGCTCAAGATGAGCACTA  
TCTTGAAATGAGTGAATGAGCTTCCACTTGAGCCTCGCAACCTAGGAGTCCCCTCGGTGATTCCAAACCTTATGAGC  
TCATGGTACGTTTGATGCAAACCATGCACCTATCTCGGACCGACACCAACATTGTCTCCAAATGGACCAAAATTAGATTTTAC  
ATGACCTACGTACCTAGGAGTTCAATCTGGTGCCTCCAAAATGATTTCGAAGCCTATGGTACTTTCGGCCAAACTGTGCACT  
ATCTTGGATCAAGATTTGCACTATCTCCAAATGGACTAAAACTCAGCTTACACACTTGAGCCTCAAAGCTAGGAGTGCCATTAG  
GTGCTGCTCATAGTATTCTATGCCAATGGTAGTTTGGCGCAACCGTGCACCTATCTTGACCCGACACTAAATTTGTCTCAAAC  
GGACCAAAATCAGATTCCACATGATCCACGTCTATAGGAGTTTCACTCGGGGTGTCCAAAACAATTTCTGAGCATGTGGTAC  
ATTCGGCGCAAAACCGTGACCTGTCTTGACCCGACACTTACACAATCTCTAAACGATGAACATGATTCCACATGACGCACGT  
CACCTAGGAGTTGCATCCGGTGCAATTAATGATTTCGAGCCAATGGTTCGTTTCGACGCAAAACCGTGACCTGTCTTGGC  
TCAAGATCAGCACTATCTCGAAACCGGACTAAAATGAGCTTCCCCTTGAGCCTCATAACCTAGGAGTGCCATTGGGTGCGTC  
CAAAATGATTCTTGAGCTTATGGTAGTTGGCGCAAAAGTATTACCTATCTTGCACTGACACTAACATTGCCCTCCAAAAGGACC  
GAAACGAGATTCCACAAGACCACGTACCTAGGTGTTCCATCTGGTGTGTCCAAAATAGTTCCAGGGCCATGGTATGTTTGGC  
CCAAACCGTGCACTTTCTTGCGTCAAGATTAGCATGTCTCCAAATGGACTNNNNNNNNNNNNNNNNNNNNNNNNNNNNNNNN  
NNNNNNNNNNNNNNNNNNNNNNNNNNNNNNNNNNNNNNNNNNNNNNNNNNNNNNNNNNNNNNNNNNNNNNNNNNNNNN  
NNNNNNNNNNNNNNNNNNNNNNNNNNNNNNNNNNNNNNNNNNNNNNNNNNNNNNNNNNNNNNNNNNNNNNNNNNNN  
GCAAGGCTATATATGAAACAGCACACAGAGTCAAAAGTTTCACTCCGATATATATAAAAGAACACGTAAGATTAAAAAGGTAT  
ATGGGTTAGGCAGAGACAGGAGTGAAAGGAGAAAGCTTGGCTTCCGACAACCTCCGAAGAAATTCAGGGTACGCTT  
AGACTAGCATCACCTTTGCTTATCCCTTATAAATACTGTGTGATAAGAGACTTTCCTACAAAATTTCTTAAGTCAACTTCCTC  
CAAGCAGGCTGTAGGATGCCTTTCCATTCAATTTCGATTGGACTTCTTCAGCATTCTCCGTTTCCAGTACTTTCACCAACCG  
CCCTAAAATTATGGTTTGATTCTGATTCTTAAATCCGAGACACCAAACTTTCTGAAAAGGAAAACCCACCAAGATCTTCTAA  
AAGCGCTTACGCTCTGACTGAAAACCCCATTCCTCTTCCAAACGTCAAAACAAGCTACAATTCTGCATTCCAGATCTCCAGTGT  
CTACAGTTGCTGTGCCCTACAGACCTAGTACTTTCTCTTATAGTCTTCTGCATAAATTCAGCACCCCTTCGTCAATTCTCTTC  
ATTATGGTCTTCTGCAACAACAGGTA

>SsLRR-RLK123

TCCAGATAAGCACATTTGCAACATATGTCTGAAAAACAGATAAAATATAGGGAACAAAAGCTTGCAACATACATGTACAAC  
TATTACAACATATGCAACATCTCCAATATGCTTTTGCAACATCTGCATGAAACAATTGCAAACTACCTCTGAAACATCTAAAAAC  
ATTTGAAATGTACACTTACAACATATGCTTTTCGGCGCAACATCTCTTGTACTTGGAAGAAATGGAGGCTCGTCAGCATTTA  
AAGTTTACGCTTGTAGAGCTCACCGGTGGCGCGAAGCGATCTCCGCAAGGGATCATGATGCCGTGAGCACATCAACAACAC  
GCTCTATGCCCGTCATAGGCCCTTGAGGTGAAATGAGAACTGGATCTGGATCCACGCGGGGTAGGATGCCCCCGCCACTG  
CCACCTCGGTGGGAGAGGGGAGGGCGGCTTGTGGCCACAACCACTTGAAGGAGGAAGGGAGAGATCGGGGGCAAAATCC  
ATAGGCGAGAGGAGAACACCATCGGAGAGGAAGGAGAGGAGTTGCTGCCGTCAAGGAGGAATGGCCACCGCCACCGCCACC  
GTCCGAATGGGACAGGGTGGCGCTGCCACCGTTGGGATGGGGAATGGCATATCGGCACACCGGGCCAGGCTCGGGCCCCCTC  
GGTCTCGGTGCGGTGAGGTGGAGAGAACCTTATCCTTTCTGCTGGATGATGGAGGTAGCAAGATAAGATTAGAGACGTTGTT  
GGACCGTTGGGCTGGTGGCCAGGCCACGAACACAACCGCTGGATGATCGGATGCCCTGACCAGATAATTTCCGATTTTTCA  
ATCGGTGGAGCACTTTGTGTTCACTTGTAGTTGTTATACCATCTCAATTTTATTTCTACTTATTAATTCAGTCCCTTTAA  
AAAATGTCATTTTGTTTTTTGAAGAGTCAATAAACTAAGTTTAAACCAGATATATACAAAAATAATACTAATATTCATGCTAC  
ATAACAAGGATCTAATCATTAGATGTATCATTAATATATTTTCATAATAAGTCTTTTGGAGATACAAAGGTTGATTCTAGAAA  
GTTTACTTGGTCCAAATCTAGCATGACATCTTTTTTGGATGGAGATAACAGAACATAAGGAAAATGTATCATAAAATGTTC  
CCACTACAAATGTATTTGTCAATCAAATCAGGTCTTAGACTTAAAAACATAAGGAAAATTATGCACAACAGTTAAGTACATGA  
AGGGGCTCTGCAAAATGGAATTGATTATCGCTGGCTATTGACAAAAATAAGGCTGTAGGGATCTCTTTTAAATCAAATA  
CGTGCATGAGCATGATCACGTATGGATCACGGCTCACGGAATAGGAAACATATGAATAGGAATAGGAAAAGGGCAAGACTA  
TATATGAAAGCACACAACAGTCAAAAGTTTCATTCCGATATATAAAAGAACACGTAAGATTAAAAAGGTATATGGGTTAGG  
CAGAGACAGACAGGAGTGAAAAGGAGAAACGTTGCTTCCGACAACCTCCGAAGAAATTCAGGGTACGCTTAGACTAGCAT  
CACCTTTGCCCTATCCCTTATAAATACTGTGTGATAAGAGACTTTCCTACAAAATTTCTTAAGTCAACTTCCTCCAAGCAGGCT  
GTTAGGATGCCTTTCCATTCAATTCGATTGGACTTCTTCAGCATTCTCCGTTTCCAGTACTTTCACCAACCGCCCTAAAAAT  
ATGGTTTGAATCTGATTCTTAAATCCGAGACACCAAACTTTCTGAAAAGGAAAACCCACCAAGATCTTCAAAAGCGCCTA  
TGGCTCTGACTGAAACCCCATTCCTCTTCCAATGTCAAACAAGCTACAATTCTGCATTAGATCTCCAGTGTCTACAGTTG  
CTGTGCCCTACAGCCCTAGTACTTTCTCTTATGGTCTTCTGCATAAATTCAGCACCCCTTCATCAATTCCTTCAATTATGGTCT  
TCTGCAACAACAGGT

>SsLRR-RLK363

TTTATCCATTTTAAAAATTAAATTTCTCCCGTTGGTTTCAATTTAATAATGAAATTAATAACATCAAAATACGACGCGAAACATT  
TTTACCATTCTCATAATAATATTTCCAGAAGCAACTTTACTGTTAACTGAACAAAAAATATCGTTGGATAAAATTTGTACAGA  
AAATATCATCAAATTTAGGTCAAAAGTTGCATCAAAAGGCTTTTAAATTAGATTCTGGAAAAATTAAGTGAATTTGTTTGT  
TACTATACAAATTTACATGTGGCCCGAAAGCATGATCTCTGTGTGCTCGCGGCCAGCATAATGCGGCCAGTTGGCCCGGT  
TGGCGCGCTCGCTGGCGCTCCCGCGCCAGGCGCGCAACCTGGGCTGGGCTGGGCGAGGATTCTGGCCCTTCCGCGCTGCCCGCC  
TGGGCGGAGGCTGCTTCCAGCTGATTCTGGCGGTCCATCTGAGCTTGACGGTTCCACGTCCAGATCGCGCGGATCAAGACCCC  
CGGCTGCTGCCCTGTGAACCTAATCCCGTTTCATTGGTTTCTCTTTCTCTCTTCTCGTTTCTATCTGAGCGGCGCACAAAGAGC  
ACCAGCAGCAGCTGCCGCCATGGCGGCTGGAGAGGAAAGTTGGCGCGCCCGCGCGCTCTCGCGCGCTGCGTGTCTC  
GCCCAAGGCTGAGCACGCCGTGTTGAGGGGCCGCATGGTGGTGGCTGTACCGTCGGATGTTCTTTCCGCGCGGCTCTG

TGTTACACCGAGGTGAAGCGTGGCTCTGTATTCTGTCCCGCGCGCCGGCCATGAGCGGCACCGCGGTCTTCTTTTCGCGCGGT  
GGCGGTGCGCGCGCGGTGAGGAAAGCCAGGTAGGCCCTTATCTTTAGGGTTAGGGTTTGTATGGAAGTTCTTTTCCGAT  
TTCAAAATCGGTTCTTTTCTTTCTATTCTGTTCCTGATCTACTACCTAGGCCCGAATGTACACTTGTGTCTATGAC  
AAGTTGAAAAAATACTGAAACATAGTCAAGCGGAATGCAATCTATCTTTTGACACCCTAGGCTCCATTGTATTGAATATTTCT  
CTATTTTAATACAAAGACGCGCAAAATTTTTGCGTAATCCACGAAAGAATACAACCTATCTGCATAATCTAAAGTCTTGTCCGT  
AGTACGCTGCGAGCTTCTCATTACGCTGTTCGCTTGAGATTATCAGCCAAATCAGCCAGCCAGCCAACTTGTTTTTCTCTC  
GAAAAAAATCAGCCAAACGATACTTTAGCCAGCCAGAGCAAAACACGGTTGTCAACGGATTCTTTCCGGCGCGAGCTGGCA  
CAACCACCTCTGTACCAAGCACGAACCTCCCTACAAAATTTAGACCGCAGTTTCCGGCGCGCGGAAAAAGTCAGAAGTCCA  
CGGGGGCCACGGGCTCGGCCAACGAAGTCGTGCTCGCAGCAAGGCAGTTGACCAGCCCTTGCGAAGTCAACCTCCGC  
CCATGTGAATACGTATATGTATCCACTGCCACTACAACAGACAGCCACTGACATGCCGGCCCAAAATGACGTGGCAAGCG  
GCTGTGAGCATGCATGGCCCACTTGCCAATGACTCCCCGGGTATGTTTTCTCGTACACGCCAGCCGATCGACGTCGTGAC  
GACTTGCAAGTTGCCATGCAACGGCTACGGCGTTGGGCCGGATAGCTCGTAGCTGCGCTGACACGGACACACGGTTTAATC  
ATAGTGGTGTGATGTAGTACAAGTGTCTTCGCTAGACCGTGTGTATATGACGCTCTGGTCGCCGCTTGCAATGTGCAATGCA  
GCAATCCACGCCGCGCAATGGCACCGGAGTAGTGTGCTGCGGGCTGTGCTTCTGTGCTCGCGCGCTGCGGTTC  
GTGCGCGCGCTCTCAAGCTCGCGCGCAGCCTGACAGCATTGGTTTCATCAGCATAGACTGTGGCTGTCCGGGACGGCG  
AGCTACGTGGACGGCACCA

>SsLRR-RLK383

AATCTTTATACACATGCATGAAGTATTAATATAGATAAAAAATAAACTAATTACACAGTTTAGACGAAATAGACGAGACGA  
ATCTTTTAAGCCCAATTAGATCATGATTGGACACTAATTACCAAATAACAACAAATTTTACTATAGTATCATTTTGCAAAAATTT  
TTGCAACTAAACGGGTGCGGAGCCAAAGCGCACCCGTTGTTTTGCTGCAATCCGACGGCGCTTCGCTTTCGTGGCGCGG  
TGTCCCGCTCAAAAGGATGCTTCCGATTGTCCACCGTCCGTCCTCGAGCAAAAGCGGTGCGGCGCGG  
GCAACTGGGGGTCTGTTTAGTTGGGAAAATATTTTGGATTGCGCTACTATAGCATTTTTTTTATTGGTAATTTGTGTCCAATTA  
TGGATTAATTAGGCTCAAAAGATTTATCTCGTGATTATACTGAAGTGTGTAATTAGTTTTTCTTTCTCGTCTACATTAGTACT  
CCATACAGTGCACAGATTTGATGTGACAGATACTGTAGCACTTTTGGGTCTTTTTTGAACATAACAGGCTTAAAGATT  
TGTATACAGATCCAATGAACAGAAGGTACGGGACAAAAAATCTCGTGGCTACACGCACTGGACAGTCAGTTGCCACTTGC  
GAGATGACTCATAGTCGTGTTTTCTTTTGTTCAGAGAAGAAAAGGAAGAGCGCGGGGGNNNNNNNNNNNNNNNNNNNN  
NNNNNNNNNNNNNNNNNNNNNNNNNNNNNNNNNNNNNNNNNNNNNNNNNNNNNNNNNNNNNNNNNNNNNNNNNNNN  
NNNAGAATGCTAAGGATTTTCGCCACCATTGCCCGGCTTCTATTGTTGATACCTTCTGTAATGAACATTTTCGTTACCCGCGC  
TACCCGTGGTCCATCGATTGTAAAAAATAACTCATCAACTTGGAGACATGGCGGCACATATATTGCGTTTAGTCTACTGTG  
GTTGGAATGGAATAGTGTGGTATCAGACCAGCAGAGTGCCTTCACTGTTATCATGCAACCGTGTACTCTGTCAATATGCTTAAT  
GCATGACTCCAATACTTCAATTTGCCACAATATATACACTAGTGTCTTTTATTAACCTTAAGTACGCAATGACATTCGTAATGC  
GTTCCATGAACCAAGTTTGACAGGGTTATTATGGTGTCTTTTTCTTATTCAAAATGCCAGAATGTATACTTGTCTGTCTATGCA  
CAAGTTGGAAAAATACTGAAACATAGTCAAGCGGAATGTAATCTATCTTTTGACACCCTAGGGTCCCGTTGTATTAACATTT  
TCTCTATCTTAATGCAAGACGCAAAATCTTTTGGCTAATCCACGAAAGAATGCAATCTATCTGCATAATCTAAAGTCTTGTG  
CGTAGTACCGTCAAGCTTCTCATTTGTCAATGGATTCTTTCCGGCGCGAGCTGGCACAACCACTCTCTGTACCAAGCAGAA  
CCCCCTACAAAATTTAGATCGCAGTTTCCGGCGCGCGGAAAAAGTCAGAAGTCCACGGGGGCCACGGGCTCGGCCAACG  
AAGTCGTGCTCGCAGCAAGGCGCTTGACCAGCCCTTGCGAAGTCAACCTCCGCCCATGTGAATACGTATATGTATCCAC  
TGCCACTACAACAGACGCACTGACTGATTATCAAAATAAAACAGGCACTGACATGCCGGCCCAAAATGACGTGGCA  
AGCGGTGTGAGCATGCATGGCCCACTTGCCAATGACCCCCGGGTATGTTTTCTCGTACACGCCAGCCGATCGACGTCGTC  
GACGACTTGCAAGTTGCCATGCAACGGCTACGGCGTTGGGCCGGATAGCTCGTAGCTGTGCTGACACGGACACACGGTTTA  
ATCATAGTGGTGTGATGTAGTACAAGTGTCTTCGCTAGACCGTGTGTATATGACGCTCTGGTCGCCGCTTGCATGTGCAAT  
GCAGCAATCCACGCCGCGACAA

>SsLRR-RLK351

ACACACTTGTGCAAAAGATTGCCCTTTCTCAAAACAAGTATGGTCAGTATTGAAAACCTGGTTTGGACTATCAGCTATCGACA  
CAGTGGGAGACAATGGGTCACTCCATGGATACTGGCGTAGATGAGGTGCGGATAGACAACCCCCACAGGAGGAATTT  
GATGGCCTCATGATCTATTTTGGTGGAACATATGGAAGGAGCAAAATAGAAGAACTTTCCAAAAACAAAGGTTTGCAACCAA  
GGGAGGTGGCAGCTCTATGCAAGGAGGAGATAGATCAATACCAGTTGGCCACTAGACCAAATGCAGAAACTCAGCAATAGC  
CCCCATTTTTCTCTCTATGTCTTGGTGTCTACTTTTTTCAGGTTTGTTTTGGCTAAAAATAGAGTTGAGTCTTTAGTGGAGG  
TTGTAAAAAATCTGTAACATTTTTTTCTTTTTCTATCGTCTAAATAAAATCTAGTAAAGTTTTTTGTGCTCTTTTGAAAAAT  
ATACTTGTGTCTATGCACAAGTTGGAAAAATACTGAAACATAGTCAAGCGGAATGCAATCTATCTTTTGATACCTAGGGTC  
CCGTTGTATTGAATATTTCTCTACCTTAATACAAAGACGCTCAAAACCTTTTGCCTAATCCACAAAGACCAGCTTTAGATTGC  
AAAAAATCTCAACCTGGAATAGTACCATTTCGTTTTATTGGCAAAATGTTCCAATCGTGACCACTAGGCTCAAA  
AGATTTCATCTTGTGATTTCCAACATAACTGTGTAATTAGTATTTTTTTTACCTACATTTACTACTTTCATGCATGGATCAAAAT  
TGATATGATGGAGAGAGAGTGAAAAAATTCTAATCTTTAGAAATGCATCTAAACAAGGCCAAACAAATGTAATCTATCTGCATAA  
TCTAAAGTCTTGTCCGTAGTACGCTGCGAGCTTCTCATTTGTCATTTGTCATTTCCGGCGCGAGCTGGCACAACCACTCTCT  
GTACCAAGCACAACCTCCCTACAAAATTTACTCCCTCGTTCAATATAAAACATGCAATTTCTACCATGATACGCTTTAGTAT  
CTTAACCTTTGACCAATTATAAATAAAAAAGTATTAATCTATGATATCAAAATAAATATCATTAGATTAATTATGAAATATATTTTC  
ATAATAAATTGATTTGAAAGCCATAAATATGAATACTATTACTGTAATTTGGTAAAAAATGAACTACTTTTTTTAGATATATAA  
CCCAATAATTACATGTTTTTACGGACAGAGGAAGTAGACGCGAGTTTCTGGCGCGCGGAAAAAGTCAGAAGTCCACGGGGGG  
CACGGGCTCGGCCAACGAAGTCGTGCTCGCAGCAAGGCGGTTGACCAGCCCTTGCGGAAGTCAACCTCCGCGCATGTGA  
ATACGTATCTTAGGTGATCCACTGCCACTACAACAGACAGCCACTGACATGCCGGCCCAAAATGACGTGGCAAGCGGCTG  
TGAGCATGCATGGCCCACTTGCCAATGACTCCCCGGGTATGTTTTCTCGTACACGCCAGCCGATCGACGTCGCCGACGACT  
TGCAAGTTGCCATGCAACGGCTACGGCGTTGGGCCGATAGCTCGTAGCTGTGCTGACACGGACACACGGTTTAATCATAGTG  
GTGTTGATGTAGTACAAGGTGTGTTCACTTTCATGCAAACTTAAATATTTCTCTTCTACTCATCACAAGGAATTTTTAGAC  
ACATGCACGGAGCATTAATGTAGGTAAAAAGATACTAATTTGCATAGTTTGTGTTGTAATGTGAGACAAATCTTTTGAAC  
CTAGTTAGTCCATGTTTAGATAAATTTACCAAATAATAACAAAAATGTTACAGTAACTTTTCACTCATTTTACCAACTAA  
ACACAACCTAGTGTCTCGTAGACCGTGTGTATATGACGCTCTGGTCGCCGCTTGCATGTGCAATGACGCAATCCACGCG  
GCGACA

>SsLRR-RLK173

TACTTGACACTAGTGTGCAACACGGTCACACACCTCAAATTACGACGGGCATGGACTAAGCATTGCGGTGACATTGCAAAAT  
TAGGATTTTCGGGTTCGGATCATACCACGGAGAAGCACATCCAATCTAGATAAGTAACTTGTTTTATTGTATGCATAACAAA  
GTTAACCTAACATGGATGCTTTGCAATGCAATTATGATGACATGGCAGATTAATTAGCACTATAACACCCGGGGGTGTACAAGA  
ACTTTATATATTTCTGTGTTCTAACAAGTTAATCAAGGCCATGTTTCAGTTGGCTGGAAAAACGGCTGATGCTGATTTGTTTTG  
TGAGAAAAATATTGTTATTTCGCTGAAATGGTACAACTAATATATTTATTATGAAAAAGTAATTAATTAACCAAAAGTACG  
CTATATATGTTTCCAAATTACTCACCATTGTTAGATTAAAGAAAGCATAATGTTATATAACGCTATATAAGTAGTAACATGCAT  
ACATTGAGATAAGTATTTATTTATATGTGAACAAATTTCTCTTGATACCTGACAAACCAATTATAAATTGCATTAATACTCTATGAC  
TACAAATTTATAAATTGTTATTAAAAATGAACTTTATATATCTTGTGTTCTAACCAGTTAGATTCAACGGTCTGTTTCGGCTG  
GCTGGAAAAATAACCGATGTTGTGTTGATGCTGATTTGTTCTGCAAGAAAAATACTGTTATTTCACTGAAACGGGTACAACATA  
TAAGTTCAAGCGAACGGGAGGCACGACTAATGGACTAGTTGAAGGATAATAGACATTTGCTTCGTGTATGATACCGTATATCC  
TCTGTTGAGTATAGAATAGAATAGAATAGAATACTAATTTATGCACCATGATTATCTATATATAATGTCTCTAGTGGCT

AGTTTTCCTTAAAAATGAGCCTATTTCGTTTCGCTGAAAAAGCCATGGCTAAAAGTTCTGTTTGCTGATTGTTTACGAGAGAAAA  
ACGCCGTTTAAAAATACAAGCTGAAAAAGTTAGGTTCTTCGATGGCAATACTGTTATCCTATTTTTCCTCTAAGAAATGGCGACC  
CGTGGATCCATTGGATGACGCACAGAGCGACTCGGACGCAATGACAGAGAAAAATCTAGAATATTGAACACTAGAGTAAAGTA  
CTCCATTCCATCAAGATACCTATCAGAGTACTATACATAGATCATTATAGAAAACACATCGAAAACGACAGTACGCATGATCATG  
TACTGATGTACCACCTACTACGAAGTACGAAGTGTACTTTTGTGACCTGATTCTCAAGAAACTGTACAAACACTGATAGC  
AGGGAGCATCGCAAGTCTCTCCGCTACCACTGAGTCACTTGGGCAGCAGCAGCTACATCAGTTGAGATGAACACTGTTG  
CATTTGGCCACGCACCCGTACTATCTATTCCAACTGCCAAGTGCAATCCCCGTGTCGATGGAGATGGAGGTCGAACCGTGG  
ATCCAGGGACACAGGACAGCAGAAAAATCCCAAATCGCCACCAGAAAACCAGCACCACAGCAGGCAACCACCCCAT  
CCATTATCCATCCATCTCGTCGACGGTCGACAGGAGAAGAGAAGCAACCAAAGCCACCCTCCGCATTTTTCTGCGGGATCAT  
TAACGCCGACTCGGACGCTTTCGGGCCGGATCCTCCGAACGCGAACAAGGAAGGAGCTATCCGCCGGGGCGTCACTGCA  
CGCGTGGCGAGATAAAATACGCGACCAGTTTGTACAGTTGTAGGGTATTTCTACCGTACCGGGACGCGGTGCGCCGCGGTTG  
ACTGACCTGAAACCACGGCCAGCGCACGCGTTTCTCCCTTCTAGCCCCCTGTAGTCGTTTCGTTCCCATCCCATCCACCTGTA  
GAGCGGAGCCGACAGAGGCGAGGTAGGCCGGCTCCGGGGACGGAACGATTTGTGAGCGCACGGCGCGGCGACGTGCGC  
GATATAAAAAGCAA

>SsLRR-RLK271

GTTAGTGTTAACCAACTGGTGCAGATACCTTCATTACTATCCATGCCTTTTCACATTACAAATCACCATAGATACTTAGTATCCC  
TGTTGGTTGATTTACAAGCCAGCAGCTGATAGTTTCTGTTTCAAGAACTNNNNNNNNNNNNNNNNNNNNNNNNNNNNNNNNNN  
NNNNNNNNNNNNNNNNNNNNNNNNNNNNNNNNNNNNNNNNNNNNNNNNNNNNNNNNNNNNNNNNNNNNNNNNNNNNNNNNNN  
CCGGACATCTGCGCTCGCTCGGTGGAGCCAGCAGCTGCCAAGTGGGTCCCCAGCAGCAACACCCTAGATAAAAATATTG  
CAACATGCTTCTACATGAAAACACTTGAAGCGTCTGAAAACATGCAAAAAAACATATAAAAACACTTGAAAAAAATCAT  
TGCAAAAACATATAAAACATTTCAGATAAACTTGCAACATATACGTGAAACATATGCAACATATAAAAGCACACTTGCAACA  
TATGCCTACAAAGCTGATGAAACATTTAGAATGTACGCTTGCAACATATGCGTACAATATTGAAACATGTCCAATATCACAAAT  
TATTTTTGCAACACCCATATAAAACACTTCTTAACATACCTCTGAAACATCTGAAACAATTAATAACATACTCTTGCAACATGC  
GCTTTTAAACACAACTCCGCTTGCTACTCGGTAAATGAAGCGTGTGCGGTGTGTCATGTTATCGGAGTTACGGCCCGCGC  
GACGCTTCTAGGTGGCGAGCCAGCGGCAGTGGCTGCATGTTGCGGAAGGGAGGCATTGGCTGTAGGAGTGGTAGGGAGGA  
CGTGCCCGCGCGACTTGGAGAGGGCAGCCGCGCGCGCTGACTCGGAGGCAACCACGCGCTGCGCCTGAGAGGTGGCCAC  
CGATAGCGCCGAGCAGGGCCTAGGGCTGTGCGCTCAGAGGCGCAGACGAGCGGATAAGAGCGATATGAAGAGGAACGAGT  
GGATAGAAATGAGTAGATGAGCTTTTTTATTTTTTTTGAAGCAGGATAGTAGTTGTTGGGTTTGATGCTACGCAAA  
CGGATTGTCCGGATGAACGGATGCCACCATTACCGCAGGACTATCTGTATCATCCCCAAATGTTCAGTCTTTATGCACACACA  
GAGGAACTAATGGCTAATGGTTTTTGGTATAGTTTACGAGCAAAATTAAGCGGCTAGTGACAAATGAAATGAAATCGTCAA  
CAACCTTGAGTTGAAGATTGCAACAATTAGTATTTTTTAATTTTATTTCTTGATTGATTCCTTTTTTTTACATGTGTTTGATT  
TTGATGCAACGTGTAAAAAGCTGTGGCCGCCATAATATATAGTGACGGGCCACCTGACAGTGGTAGCACACTTTTTTTTTTCC  
CGCCCTTTCGAAGGGAGGGGACAGGTCGTCTGTCAGGGAGGGAAGGCGGTGGTGGCGCGGGTGGGAATGACGTCCGAC  
GAGCTCCAGTCCAGGATGGGGATGAGGACGAGGAGCTTACCTGCCGTTCCGCGCTCGAGTTTGACCTCTTCTCTCGGTTT  
TTTTCGATATTTCTCCCGCGCGTGGATTGGCTCGGTCTATTCAATCGCAGCAAAATTCGACGAGTGTGTCAGAAAATGG  
GGAGAGGAGACAGACGCGGTGGAGAGCGAGATGCCGAGAGGGGAGGGGAAGGCGAAGGCGAGCAGAGCAAAACCAAG  
TCTGTTTTCGGCACCAACCCCGTCCAATCCAATCGCTGATGCTGGATGATTGGTCTGTGCTGAGGCTCAGCCTTGCCTTCA  
CCTCTTCAATTAATGCTTCTGAGAGCGGTCAATGCGGATGGTTGGGTGGGATTGGGGTTTGGAGATTCCATCTACTCTCT  
CCACCTTCCCGGAGAGGCAGCAGAGGGAAGGAAGGAGGATGAAAGAAATGGTCGCAAGAGGTGGAGGGGAGGAAA  
GGGTCAATTGCAGCTCGGTGTCACTCAACCTTAACACGAGC

>SsLRR-RLK283

CGTCGTCGCCGGTGTCTGCTCCGCCGGCATCGCCACGCTCTCGCGCCGACCAGCCGGTGTACCACCCGCCTCTTCTCACCG  
GGACCCTCGTCACACTCACCCGATGGTGACGAGGCGAGGCGTCTCGCCCGCAGGCCCTCACCGCCGCCCTGCGAGCCGGG  
ATCTCTCCGGTACCTCTTCCGTCCGCGCGGCCCTTGGCGGATCTCTACCTGGCGCCGCGCGATGGACGAGGAGTACGCGGCC  
TCCTCGCAACACGAGGTGGGACCTCGTGCCTCGTCCGCGGGCTCCAACATTGTCAACGGCAAGTGGATCTGGACGCACA  
AGAGGCGGGCTGATGGTTCTTGGAGCGCTACAAGGCTCGCTGGGTCTCCGCGGCTTCACTCAGCGGCCGGCATTGACTA  
TGCTGAGACCTTCAGTCTGTGGTGAAGCCAGCTACAGTCCGCACCGTCTCTCCCTGGCTCTCGAGCGCTCCTGGCTGTG  
CATCAGCTGGATGTCAAGAATGCCTTCTCCATGGCACTCTGACTGAGACGGTCTACTGCAGTCAGCCGGCAGGTTTCTGTG  
ATTCTTCTCGCTGACTTTGTCTGCGCGCTCAACAAATCTCTACGGGCTCAAGCAGGCACCCCGGGCTGGTACTCTCG  
ATTGCTACCTTCTGCGACTCTTGGGTTACGGAGGCCAAGTCTGACACCTCCCTGTTCAATATACCACTATGGGGTGAG  
ACTGTTTACCTGCTCTCTATGTGGATGACATTGTTCTACCGGCTCCAGCGAGTCTCTGCTCCACCGCATCTTCTCTCTCCA  
GAAGGAATTTGCTAAGGATCTTGGGGTGTCTCCACCACTCTCCGCGTCACTGTTGAGCCCCGACCTTCAGGCTGTTCT  
CTCCACCAAGCGCAGTCTACTTGTGACATTCTGGAGCGAGCAGGGATGACCGCTGCCAGTCTGCTCTACACCGGTGGAC  
ACCAAGGGCAAGCTGTGAGAGGCTGGGGTCCGATGCTTGGGCCAGCAGACTCCACCGCCTACCGGAGTCTTGCTGGCGC  
GTTTCAGTACCTCACTTTACACGGCCGGACATCACTTATGCCGTCCAGCAGCTCTGCCTCTACATGCTCTCCGCGGGAG  
CCCCACTGGCTGTATGAAGCGGCTTCTCCGTACTCCGTTACCTGAGCAGTCTGAGTACGGGCTGCTCTCGGCTCTCTCCAC  
TGCCGAGCTGGTTGTCTACACCGACGCTGACTGGCGGGATGCCGGACACCCGACGGTCCACCTCCGGCTACGAGTCTT  
CCTCGGCGGCAACCTGGTCTCTTGGTCTGTCGAAGCGCAGCCGGTGGTTCCCGCTCCAGTGCCGAGGCGGAGTACCGCGC  
GTGGCAACGGCGTGGCCGAGGCGCCTGGCTCCGCCAGTCTCTGGCTGAGCTTACCGCCCCCTCGCCAGGACGACGCTC  
GTCTACTGCGACAACGTCAGCGCGGTCTACCTCTCCAAACCCCGTGCAGCACCAGCGGACCAAGCATGTGGAGATCGAT  
CTACACTTCGTCCGCGACCGGGTGCCATCGCGCAGCTCCGGGTTCTTACGTCCCGACCACCTCCAGTTGCGGACATCT  
TCACCAAGGCCCTCCCTTCTCGACCTTCTCCGAGTTTCGCTCCAGCCTCAACGTCTCCGTGGCTAGTTGTGGGTGCGGGGG  
GTCTGTGTGTGTTGTGCTCCTACTTGTCTTCTTGTTCAGCCTTGAACCTCCGCTGCGCCGGTAGTTTCAGACTGCGGGGG  
GGTGTGGAGTGTGATTGTATTAGGCCATGAGGCTAGGCCATGTGGCCATGTATGGTACCTATATAGCTACCTTCTAGGG  
TTAGCCCAAAATATTGAGAATCACTTCTAGCAAATATCTTGTGGATGGCAAGCAGGCTAAGTGCAGGCATAAGGTTGT  
GGGTTCGACTCCCCGAATCAAGTGTGTGAGAAAATG

>SsLRR-RLK284

ACAGGAACTATCAGTGCTGGCTTGTAAATCAACCAACAGGGATACTAAGTATCTATGGTGATTGTGAATGTGAAAAGGCAT  
GGATAGTAATGAAGGTATCTGCACCAAGTTGGTAACATACTGGCATAGATAGTCACCAAAATCCATGCCAATTGATAACACTT  
GGGCGCTTGGGGGGCTGATTGTTTCCAGCTCGTCTTATGTCAGCAATGATGCTTATCTGAGTCACTTCCCATTTTTTACCG  
AGGGATGAGTCTTTTTTTTAGTAGTGAGATTGTTTAAAGTAGTTTTGATTCATTATTGATCTTGAATAGTAGTAAAGCCCCGA  
AAATAGAGTGAAGTATATTGCAACAGCAGGCTAGCTTGAGTACTGATCACATGATTATAGTGTATTGTTAGTGAGAAAATA  
GTGCATTAGAGATCAGAATAAAACCAAGTTAAACCAAGACTACCACTTGATCTACAGACAGTTCGATGAAGTACTTATAGA  
GAAAATTAAAGAAATCATCAAGTTAAGTAAGCATCTATTCAAAAAGAAATTAGACCCACACTCCAGGTTAATATATTG  
TGTGGTTCCCAAAAATGTAGGTAGCTCTAGTTAAATTCATGAAGCTATGAGATAACAAATGATGGCCTTATCAGCGGCT  
AGGCAAGGAAGGAAGGGGAGAAGGACATTTATAGGATGGCTAGAATCCGCGAGAGGAAGCAAGGGACATCAACCAATAA  
AATGCATCAAGGATGGGACAGATCGACTTCTGGTGAAGATGAGGATCAAGGACAGATGAGAGACATCTCGACAAG  
CTGTTTAAATGGGGAGAATGAGGGTCTGCCCTTGAAGTGGACGACTCATTTGACGATACCAACAGACGCTTTGTGAGGAGA  
ATTGAGGAGGCAGAGATCGGAGAGGCTTGAAGAGGATGAAGGGAGGTAAAGCGATGGGCTGATGGTATCCCCATCGAGGT  
ATGGAGATACCTAGGGCGCCAGAGCGATAGTATGGTTGACTAAGCTTTTTAACCTTATTTTTTCGATCTAACAAGATGCTGAAG



TTAATAAATTGTTTTATGTTTTGTGACACAAAAACGCTGCCATAGATTGATGGCATTGTGAAAAATAACTGCTAAATCTCAAAT  
GAGGGGTGAACCAACTGTGATAAATGCTTTCCAACGAGCTGTGAAAAATTTACGTAGTAGTGCATTACCATAAAATAACTGCT  
AAATCTCAAATATGTTTTGTCTAAAAAAAATCCATCAGAAAAATAAATCTCGGGTCCAACAACGGCAGGGCTGCTCATGCCCCC  
GGCGCTTAGCGGCGACGCCGACTTGACCAAGTTCACGACATCTCTGCAGCCTCAGGGCCTCAGCGCGGCGCGCTAACCCCTC  
GCCTGCGGTGACGCCCTAGCCAGCCACCGGCACCAAGCCAAAGGCAGGAGCTGGCTGTGCGCTACAGGACAAGCAGGGGA  
CCCCCGCTCCGCGCGCTTCGCGGCATGCCAAGCATCATAGCGGTGGCGTCAACCGCTCTCCAATGCCTTTCCCCCACCGA  
GAGAGCGAGGAGAGACTGAGAGAGTCCGTGCCGGTCCGGCTTCCCCCGTTTTGTGCTCATTGCTGCTGCCTCTCGCTCTATC  
CTCTCAGTCTCTACTCGCCTCGCCTACTGACCGCGGCTGCTCCAGCACCAGCAGTTAGCGTTCAGTATCCCACTCATC  
GCGCCATCGCCACCTAGAGCGCCAT

>SsLRR-RLK323

CCAATCTTTAACCTCCTTTGCTTTCTCTCGCTTCTTTTCCCTTTTCTTTCTCTCTCTCTTTCCCTCAGCCCTCGTTTAGTTCC  
CCGAATCGGGGTGGCAAACCTTTGACAGTGCCACCCCGAACACTGTAGCACTTTTGTTTTTTGCGGTAATAATTGTCCA  
AATCTTGATTAATTAGGTTAAAAATGTTTCGTCTCGCAGAGTACAAAAAACTATGCCATTAGTTTTTGATTTCATCTACATTAG  
TACTCCATGCATATGCCGACATTTTGATGTGATGGGAAATCTCTTTTGCTAGTGAAATTTGGGAGTGAAATCTGGAAATCTA  
AACAAGGCCTCAATCTCTTTTTTCCCTCGTCACTCTTTTGTTGGCTTTGTGAGGAGACCCAGAAAGCGACCGTCTCGCTACT  
ACTCCATCGTGTGCTGAAACAGAGGAGGCGTTCTGGTCTCTGATCAACGAAATGCGTTCCCATGGCGCGGCGGCGGAGGA  
TGCTAATAATCCATGTCTGCCGTCTGCGAGCGGCAGGATGCACTGCGCTGCGCGGAGCATTCGCTGCTCGTTTTTACCGA  
GCAGCAGTGCAGGACGCGGCTGCCAGAGGCACTCAGGTTACACAGGGCGGTCTGTCTTTTGACCCGCTCCTCTTCACGCC  
ACGCCAGCGAGGGAACACCTATCGCTTGCATGCGGGCCAGGATATCTTTGACAGGCCACATGACAGTGGCCGATGCCTCC  
TCTTGCCGCTGCTCGGGCTCGGGGGACCCACCGACTTGGTTCTCTGACGCCCGGCGGAAGCAATCAACACCATGCTG  
ACTCCGAATTCCTTCTCCCTCTCCCTCCGATAAGGAGGGCAAGTTCCAGCAGCAGACTTGAGCTGGCTCCCTCTCTA  
CCAGAACTACCACAACAAGGAAGAAATCAGCGCATCTTCTTTGGGAGCAGGGAGCAAAATGGCGTAGTAGTTGTGCTCTT  
GTGGGAATCAGGCAGTTTCTTGCGGGTTTTGATTGGACGGTGCCTGAAACTTCTTCACTGACAGCTTCTGAATAACAACCTC  
GCTGATGACCACTGATTCTTGGGTTCCACTGATGTTCTTACGGCCACCTAGCGTGGTTGCTCCCAAGTAAGCAATCAATCC  
TTCAAACTCAGTAGTCGACTCTTGGCGTTTTTCTCACTGGACTCCAAGGATCGCATTACTAATAGGAATTACGTAGCAGCAGCT  
TGGTTTGTTTAGTTGGACTTGAGAGATCAGACTGIACTTGACACTTTGACAGAGAAGGATATCTCTGACAGGCTCCCGGAGA  
CCAGCTTGGCAGCTACAGTCGATATTATATATAAACCGACAATCGGATCTAAGTTTTTCTGTTATTTGGAGATTAATTAGCAG  
TAGGGGACACCACTGATCTGAACCTGAACGGATGCTCCACTTTGACAGCGATCAGCATGGGCTCAAACTAGCATCAATCAGC  
ACCACCAGGCCCTTCAGAGTTGCGCTACTTCCAGTCCAGCTCCATGCAGCACCAATAAAAGAAAGCCCGGCATTGCTCA  
AAATCGCGCACCACTGCACGCGGGTCCCGCGGACTCATCAACGGCCCCCGCCCCCTGCCCCAGCCCCGGCTCGGGCCC  
CACCCGTACAGGTTCCATGCCATCCATGATCATTCTCTCACTGCTCACTGTACCCAAAGATGCCAATGGCTGAGTG  
GGCATGCAGACAGCAGACCAGTAGACCACCGACCGGGGCATCGGCTCGGCATCCATCGCATCGCCCCATTTCCTTCTG  
CGTCTTGCTTTGCATGACACGTGAAAAAGCAAAGCCAAAGGCACTCGGTTCCGCTCCACTCCACTTACTTTGCGCTGCCG  
CCCTGCCCCCAGCGGCCAGCTCTCACTTTTCTTCTCCGACCGGGCGGCGCTCTCGCACCCATCATTCCGACGTTCCC  
CTTCCCCGAGCCAGCTCTTCCGA

>SsLRR-RLK299

CGGATTGACAGCCCCAAGTACGTGCCAAACGACACCATTGCTAAAGTGGAACCACAACCGCACAAGGTGAGCCCTCTCAA  
AACTCATCCAGGATTTTCAAAAAAAAATCATCCAGGACCAACCGGTGTCAGTGTGTCAGGATCCGCTCCACAGAAGCTG  
AGAAGCATAAAACCAAGTCTCAATGGGGTTTACGTCCTCAGTTTCAACACATCTTATTTTGAAAACAGTGCAAAAGAGTTTC  
ATCCATATGAAACTCTCTGCTCCATAAACTCTTATCATCTCTCTCTTTATTGATACGGTGCCACATCAGCATATTTAATGC  
CCATAAAATTCTGATAAAATTTATTGGGACTGGCCTAAGTGAAGAAGGCCGAGATCGAGCAACCGCAAATTCGAAGGATT  
GCTGGGTAGGCATGGCATCCAAAGTGACAGGATGGGTCTGAAATCTGATGCTCGGTCAAGTAGCAAGTAACAAATGGCGA  
AATGGGAGGTCCACAAGGGCAAAGAACAAAGGGAGAGGCCACAGGCCAGTCAAACCCACACATTTTGTACGAATCAGAC  
GGGAGCTAACATAAACTAAGCAAAAAAAGCCATAAAAGTACAGTGCAAAAGACAGACAGGAGTCCCAAGTGGCG  
AGTCTACTCTATCTACCGGGAGATTAAATTAGTACTGATATTTCTTTTATAATAGTTAAAGCCCTAGCAGGCTCTTGAG  
GGACTTCAGCTTTAACTAATTAACCTCATATATGTGAAGTCCGACCAAACTCTAATTCAAAATACAGTTTCATGAGACAACT  
AAAGAAAAGGAGAGAAATTGTTTTCTTGGTACAAAAGGTAAACTATCTAAATGTCTGCTTAAACAGCTATAAAGAATGTC  
CTATTTGGCAAGGATTTTCGTGAGGCTCTGCCAAACGTCACCTAAAAAATGGCTCCACGAGAAAAGTTCTAAATGGGAGGA  
CAGCTGCTTTTCTACTACAGAGGTGAAGCCATCTAAGGCAATTCGCAAAAGCTTCGGGTCCGTTTTCTTTTGGGAAATTT  
CTCTAGTAGAGCTGAAACCGTTTAGAAAACATTTGACAAAAATGTTTTAGTGGTAGCTTTGTTGTAATTTATTCTAAGTTTGT  
GAAGAGGATTCGAGGAAGCCAAAGTTTTCGACGCTCTACTAGCCCAACATGAAAGTTGCTCTGGCTCGGCTGGGCTTCTTC  
TGGAAGCCATATCTTGATGGTCATTTGCAGGACTTCGACTTGAGCCGAGCCACTCAAAAAGCAGTCCCAACAGTCTCT  
ATATACTGCTTCTCTAGCTCTTCCACTTTGTTTCATCTATGATGTGCCAGTTAACTCCAAACCAAGAAGATTGGAGGAGAT  
CGATGAGGATTAATGGAATTTTGACTTCTAAGGATTTAAGCCACCTCAACCTCCTTCAATTCTCTTGATGTGAGGATTAACC  
AAACAAGCCCTAAGGGCAGTCCCAATACCTAGTAATTTCTATACATATTAATTTCTATAGATATTACATATACCATGGTTCCAATG  
GATAGTTTATACAGAAATTTTTTATCTTACATACATCTCTCTATTCTCTACCAATCACAATTTCTTATGCTCATCTTTG  
TGTAGACATGGTTTCTAACTTAGACCCGGTTTCTATGATTTTGTCTTTCTTCAATAACTACCTCGCCACATCAGCAAAACGT  
TTAGGTGATAGTACATTAATGTCCATAGAAATTATGGTGATTCTGTATTGAGCGTGGCCTAAGTGAAATACGTATTTCAAA  
GAAACCATGTCAAACCTAGGACAAAACCTTGGACCTAGGCTACTCCAGGACTGCCACGCGATAATTAATGAGTCTTAAGAAA  
AGAGAGATGCTGATGCCCTCCAAATCATGCTCACTCTGCTTTGATTATGTTAGTGCGCGCAATAACTACTCGCCACCTTCC  
TCCGTCTCTCTCCGATCCCC

>SsLRR-RLK265

ACAAGCACTTCGGTGCAAGATAATACGAGACTCCCTCCCCATTGGACGTAGGGCATTCTTTGGCCCGAACAGTATAAAT  
CGTTTGTGTTCTTCTTGCACACCATCCGGATCTCCGACGCGCAGACACATATTACTCGTTGGTGCTAGAACCGCGGTTTCTTA  
CACCAGACATCTAATTTAGAACGGAGCAAGTATTTTTTCTGTGAAACAAGCCACAAGAAAAAGAAACAAGGAGGGTGAA  
ATGTGAAGAAAATTAATCATTTTGAATGAAGACTAAGGTCTTGTTTGGATCCAGCAGCTGCTAATAGCTCATACCTCGTAG  
CTAATATTAGCTAGCTAATATTAGTTGTTATTAGCTAATTTACTCCAACATGTGAGATACCTTGATGGGTGAATTGAGAGCGT  
AGTTAGTACTTCAGCTTAATTAGCTAGACTATTAGTGGGACCTGTTAGATCGTATTGATTGTAATGCATTTCTTTCTGTATCC  
ATGCTCTTTTTGGGAATTGCAAGCGGTTACAGCTGGTACTTGATGCTCAATGTGGTGAAACAACCTTTTGAGAGGCGAATGT  
AGAAAGGAGAGATAAAGATAAGAAATGCCATTCTAATAGAGTACCAGGGGAACCTTGCTGTGAAGGCTATACACCGCAT  
CCCATTGGCAGCCACAGGAATCATGATTAGTCTTGTGTTGATTGTGTTGGAAGCAGCACCATCTCCCTTTTGGGGCCACCTT  
TAACCTAAACAATCTCCACTGGCCTGCATGTGCATATTCGTGTGGGAAAAAATTTCTCTCTCTCTAGTAGGCTCCAAGAAAT  
TCACAGATGCTAAATGAACTGAACACCGGAAAGTGAGGAAACGCCTCACATTTCTCAAAAAAACAACAGCAGGCAT  
TTCTTTTTCTTTAGAAAGTCCGCACTTGTGTTGATGTTGCTGATTCACTTCACTCAATCCACATATGTTGGGGTGAATTGAGACG  
GAATTTAGTTCAAGTTCCACTCCAATCCACCCCAACATATGGATTAATGCAAATCCGACTATATCAAATAAGGTCTAAGA  
AAAGAACTAGGAAGCATGTGTTCTGAATCAAAGCTTAAGAACATGATTGTGACTTTTGAGTTACCTCATTTCTTCTGATCAAC  
TAGTGTACCAATTTATGCTTTTTCTTGCAGGCTAACATTTGGCTAGGTGACGGCATGATGATGGCGCCCTGCAAACTAAGTA  
GTACGTGACAACGGGTGACGTGTACCCCATCTCTGATCAGTGATTACTCTAAATTTCTTTTTTAAACGAAGGTGATTACTC  
TAGAATTGTGCTAAGTTTCTGCAATATAGTGGACTAGTGGGTGCAACAACTCTCTCAGGTTATTGCGTCATCCTTCCCTAATA  
AAAATGTCAAAGATATCAGGTGCAAGCAAGTGCGAGGAAACGACCACGGCGCAAAGAAACACCCGGTTTGGCCGTGACA

CGGAACGAAAGTGATTCTATACCCCTGATCCCAGGAAGATTGAAGCGTCACCTAACCGGCCAGTCGCTCTCAGTGTGCCT  
GCGTGAAGGAGCGTGTGGAAACCGGACCTCCAAGCTGAGAAGACCTGAATTGGTCCGGAAGATTTCAAACTCCGATGGAG  
GGATGACCCGGATGAACACCCGCTGCTCTGATAAGGGGATAAGCTCAACTGTACGCTTCAAGGTAAAGATGATTGTCTACCTGAT  
CTGGTACTCTGGAGCTTGCTGTGTTTGAAGCGAGAGTAGCATGTCACGTGCGGCCGTGCGGGCCATGGGGCGAGTGTGTGC  
CGTGTCCGGAAGAGTAGGTAGGCGGCACGTGCCCCAGGTGTACAAACTCGGCTCCGGTACGTGTACATACAGCGGCTGTAG  
AGTGAGATCCGAAAAGGGCGAAGAGTAAAGTGGAGCTGATGCACGGCAGGATTAATACCTGGGGGCGGGTTTGGTTGGG  
GCTTTGCTCTCGTACGATTAGACT

>SsLRR-RLK365

CCTCATGAGCCGCCATGGTGAGCAGCATCTAAATGGACTTCATTTCGAGCAACAAGTGTGGAGACCTCATCGTAGTCGATCCC  
CTACCGTTGGACATAGCCCTTCGCCACAAGCTGAGCTTTGTGCTTAAACAATGGGTCCCTTATTTCGTCATGCTTCAGCTTGAAG  
ACCCCTTCAGGCCAATTGCATGATGGCCTGGAGGTAGGTCGACAAGCATCCACATGTTGTGTTCTGTTTCGATCGACGTCATC  
TCCTCCATCATCGCCTTGACATGGCAGGTTTCATACCCACGACAACACCATTTGGTCTCGAGACATTCTCTAGAGTGTTCAA  
AACGAGAGCAAAGCCTTGCCATCATGCTCGTCGTGAGGTCCAGATCACCAATGGGGCGACGCGAACTCCGTAGCTGGTG  
CAGGCATAGGGGTTGCCGGTGGCATGTTAAGATTGTTGATGGTCAATTAACATCATCTTTTAGGCCATCAACTCGTGCTTAAATTT  
GAGGATATGAATGATATCCACCATAGGCATGGGCGATATTTCTAATCAACTCCATAAGTTTGGTAACATATGTGAGTGTAGGAA  
CAAATAAGTGAAGATGAGCCAGTTGGGAGGTTGGGTGACCTAGCATTAGGTTGGTTGACCCAACCTAGCCTATCCAACCC  
CACTATGTCACCACATCGAAGGAACATACCTAGATGTCATCAGACATGTTGGTTCAACATCGGTTTACATCAAAAGGATGAA  
ATGAAGCCAAGTGGAGACAGTGGCGGAACCAAGAACTTTTGATCAAGGGGGTCAGACAATACGATGACATCTTGTAAACATA  
ATAAATATATACAAAAAATATACGCTCTAATAGCTTTTGTAGCGTTTTCATATATATATTTAGTACTTGTAAACAAAAAACACA  
ATATTTATCATAAAAAAGAGTGAACAATAACTTTTACTATGCAATTAATCTTTTATATGATTTAAAAAAATCATTGCGCTT  
GGGGGGGGGGCGCCCGCTGGTTGCGCCCTGGTTGCGCCAGTGAATGGAGAGCACAAGGATCCATGACCCATCCAATAGA  
ACAAACACACTTCAACTACCCACATTTTCATATGGGTTATAGATCAACTCGCCAACCAAAGATAAATGACAAAGAGGTTGGAT  
CACTTCGGGGGATCCCATATAGGATCGGCTGACCCGCTCTAATTTTACCTAAATTTATTTTAAAAAACAGCATCAACATTTTATG  
ATTTCAAATGGGTAGTCTATTAATAATCTTTTCATGACAAATATAATGAAACATGTTCACTATGATAAGTATTACCTGCTTTTATC  
AAATTTGGTCAAACTTAAGGGAGTTTGACTCAACACTATTCTATAATTTATTTTCTTTCTGGGATTAAGGTTATAGTTCACTTT  
GGCTCTGTCTTAACTCTAACTTTAAGCAAGTTTTTAAAAATGCACCGATGTCTAAAAATATCAAGTTAGTTTTCATTAATTTCTC  
CATTGAATATGTTATCATATTTGATTTATTTGATTTTATAGATGTTAATATATTTTCTAAGAACCTAATCAAAATTACATAAGCTT  
TATTTAGGATGTTGTTTATTAATAATAACTATAATTTAAAGTGAAGAGAGTAATTTATAATTCTGTGATCACTAGTACTGCTTTTATC  
GCCTAGGAATATGTAGATAGTAGTGGTTTGGGCATGATAACAACCTTTGAAAAAGAAATCCAACCTTTTCAGAAAAATCCCATGCA  
CACAAAAAAAATGAGAGGAATCACACCCGAGGAATACGTGCTTCCGCGCGCAACATCCCCAGTCGCTATTCAACAAC  
CATCGACCAATCTCGAGCAAGTACAATTTGGAAGAACGAACATGATCAATCCAATATAAACAAAGTGGGAATACGATATATA  
TTCTGGACTTGGCCACTCCAATTGTATAATGCATATACAGTAGCTTTTGATTCTTTTGAGCGAAAGGAATTGATCAACTGAAGG  
CT

>SsLRR-RLK153

TTCCATGAGGTTTTTCCTCTGTATCTTTTACTGGAACCTCAGATCAAGCAGGTGATGAGTACTCATTGGATTCACTTGTCAAA  
TTTGGTATCAATGAGAAGAAGACCTCTGGTGGGAAATTGGGCTTCTTGACAGCTCCCTGCGGAATGCACAATCAGCGCAAG  
GCATATGAGGTTGAAGAAGAATTGGTGGTCAGTGGATTGGGGAAGACCCATCAGGTGTATAAGTATGTGGGAACATGATG  
GCTGCTACTTCAGGTTGTGAGCAGCAAGAACACTAGTACTTTTGGACCGCTCTGATGATTCTTGTCAAAGGAGCATAT  
AGAGGTGCCAGCGCGAAGTTGAATGATCAGCCAGCAAGAAGAAGGTTGCTGGCGAACAATTTGTAAAGCACGGAAAAAGAT  
CTAAGTCGTCCACGTTTCAGTTTTTTACTTTTGCTTCTTCAATAAAGATTGCTTTGGTAGTTTCATGCTTCAGAAAGTAGGTAAG  
AAACTTGGATGTGCTTTTATAAACACGCCAATTCAGATCCAGTGGCATGCTATTGTTCATCAGTAACTATCAATTGCATCATCAT  
TCTACCATTTAGCTGTGACAGGACGAAGGATGATTTAAACCATTTATGCTGGCAGTCAATACTAGCACTAGTACTAATCA  
AGATTCTGACACAATCACACTATTAATTTATGCCAGCATTGCTTACTCCACATTAACCTGGATTGTTTCCGAATTTCCGATCTTAA  
TCAAGGCATACGACAGAGCTGCTCTTGTCTGTCTCTTTGAGATAGGACTAGGAGTATGATTTTCTGAAAAGCCTTTTTTTT  
GTCTTTGAAAAGCTCTTTGACAGCTTATGCTGTTTTTTTATACATGATGCTGGTACTTAATTTTGAAGTCAAGACATACTT  
GGACCTTAGATTGCCATGTTTCGCCAACTGTGATATTTTGGCACTGGGAAATCACTGATATCCTTCCAATAAGTGTAGCAAAAT  
AACGACATCACGCCATGAGTAAAGTTTGGGACCTCGACATGGCAAAGAGATTACAAGAGGTAAACCTGGTATTGTCTGAGA  
TGGTGTGCTACAATTTTGCCCATGTTTGTCTCATCTTACATTTTAAAGCTTCTTTTTTAAATCATTACCTGATCATCACAGAA  
CCAACCTGTGAATTCATGGAAATTATCATAAATTAATAAGTAGTATAAGTATCACCATCACATGCAGCGTTTTTCCCCAAATGCCTGA  
ATCCTTTTCTTCAGATGAAGTGAATCATTTCATTTCATGACCTACCTCGAAATTCATAGCGGAAGGAATGGTGGGGGTGGGT  
GAAGGATGGATCATGGATGAACGTGCAACAGAGCAATGGACGGTTGCGATGGGTATCGTGCAGCATAGATGATGGGGGT  
GGTATGCCATGCTTTCCCAAGAGGGCCCAACGAGGCAGTGGCTTGGCGCGCGCGCGCGGACGCGGCGCTCCCTCG  
CTTCCCTGTCCCTGGCCACCTCTGAACCGAATCTAACCGCGCGCCGCCACCTTCGCGCGCGGAAAACTCCCCCTCCCCCTTCGC  
GCCGCGCGCGCGGACCACCCATCCCGGCGACAAGGGCTCTATCCGGCTGCTCCGCCAGGAACCAATTTTCTCGGCGC  
GAGAAACGCGCGGGGAAAAAGGCCAGGACCCCATCCGCTGCGGCGGGACCAATGGGCTCCGGCGAATAGCTCGAGACCC  
TCGAGCTCGCGCGGAACAACCGAGGCGACAGCGTCTGTTCTCCCGCGGTGATGGCGGATGCGAGGATGATGAATCGACC  
CCCAAACCTGAGCCAACATTTCCGTGCCCGCGCTTGAACGCTGCGGTGGTCCCGTCTTGTTCGTTTCGTTCTCCAGAAT  
ACTGGGAACCTGAGAGGCAGAGGCTCGGCCAGCGACGGTGGGTAGCGAACTGGCGCCTGGTTCCCGAGTTGCTAATCTCC  
GGGAGGAGGCGCTCCCGTTGCCA

>SsLRR-RLK194

TTTCCCTCTGTATCTTTTACTGGAACCTCAGATCAAGCAGGTGATGAGTACTCATTGGATTCACTTGTCAAATTTGGTATCAA  
TGAGAAGAAGACCTCTGGTGGGAAATTGGGCTTCTTGACAGCTCCCTGCGGAATGCACAATCAGCGCAAGGCACTATGAG  
GGTGAAGAAGAATTTGGTGTCTAGTGGATTGGGGAAGACCCATCAGGTGTATAAGTATGTGGGAATGATGGATGCTACTTC  
AGGGATGTGAGCAGCAAGAATACTACTGTACTTTTGACCGCTCTGATGATTCTTGTTCAAAGGAGCATATAGAGGTGCCA  
GCGCGAAGTTGAATGATCAGCCAGCAAGAAGAAGTTGCTGGCGAACAATTTGTAAAGCACGGAAAAAGATCTAAATTCGTCC  
ACGTTTCAGTTTTTTTACTTTGCTTCTTCGATAAAGATTGCTTTGGTAGCTCATGCTTCAGAAAGTAGGTAAGAACTGGAT  
GTGCTTTTATAAACACGCCAATTCAGATCCAGTGGCATGCTATTGTCTCAGTAACTATCAATTGCATCATCATGCTACCATTT  
AGCTGGCATGACAGGACGAAGGATGATTTAAACCATTATCTGGCAGTCAATACTAGCACTAGTACTAATCAAGATTCTGACA  
CAATCACACTATTAATTTATGCCAGCATTGCTTACTCCACATTAACCTGGATTGTTCCGAATTTCCGATCTTAATCAAGGCATCA  
GCAGAGCTGCTCTGTCTGTCTCTTTGACAGATAGGAGTAGTATTTTCTGAAAAGCCTTTTTTTTTTGTCTTTCGAAAAGGCTC  
TTTGACAGACTTACGCTGTTTTTTTTTATAACATGATGCTGGTACTTAATTTTGAAGTCAAGACATACTTGGACCTTAGATTGC  
CATGTTTCGCCAACTGTGATCTTTTTTGGCACTGGGAAATCACTGATATCCCTCCAATAAGTGTAGCAAATAACGACATCACGC  
CATGAGTAAAGTTTGGGACCTCGACATGGCAAAGAGATTACAAGAGGTAGTAAACCTGGTATTGTCTGAGATGGTGTGCTAG  
AATTTTGGCCATGTTTGTCTTATCTTTTACATTTTAAAGCTTCTTTTTTAAATCATTACCTGATCATCAGAACCAACTCTGTA  
ATTATGGAATATATCATAAATTAATAAGCTAAGTATCACCATCAGATGCAGCGTTTTTCCCAAATGCCTGAATCCTTTTCTTC  
AGATGAACATGAATCATTTTCAATGACCTACCTCGAAATTCATGCGGAAGGAATGGTGGGGGTGGGTGAAGAGAAATA  
AGGATGGATGATGAGTGAACGTGCAACAGAGCAATGGACGGTTGATGGGTATCGTGCAGCATGATGAGGAGGTGG  
GGTGGTTCATGCCATGCCTTTCCCAAGAGGGCCCAACGAGGCAGTGGCTTGGCGCGCGCGCGCGGACGCGGGGACGCTCCC  
TCGTTCCCTGTCCCTGGCCACCTCTGAACCGAATCTAACCGCGCGCGGCCACCTTCGCGCGCGGAAAACTCCCCCTCCCCCT  
CGCGCGCGCGCGCGGACCACCCATCCCGGCGACAAGGGCTCCATTGGGTGCTCCGCCAGGAACCAATTTTCTCGG



CGCGAGAAACGCCGGGGGAAAAGGCCAGGACCCCATTCGGGTGCGGCGGGACCAATGGGCTCCGGCGAATAGCTCGAGC  
ACCTCGAGCTCGCCGGAACAACCGAGGCGGCACAGCTGTCTTCTCCCGGCGTGATGGCGATGCAGGGGATAGATAATCG  
ACCCCAAACTGAGCCAATTTCCGTGCCGCGCCGTGTGAACCGTGCAGCTGGTGGTCCCGTCTTGTCTTCTCCAGAAAT  
CTGGGAACCTGAGAGGCAGAGGCTCGGCCAGCGACGGTGGGTAGCGAACTGGCGCCTGGTTCCCGAGTTGCTAATCTCCG  
GGAGGAGCGCTCCCGTTGCCA

>SsLRR-RLK181

CGAGGAATCCATGAGGTTTTCCCTCTGTATCTTTATACTGGAACCTCAGATCAAGCAGGTGATGAGTACTCATTGGATTAC  
TTGTCAAATTTGGTATCAATGAGAAGAAGACCTCTGGTGGGAAATTTGGGCTTCTTGACAGCTCCCTGCGGAATGCACAATC  
AGCGCAAGGCACTATGAGGGTGAAGAAGAATTTGGTGGTCACTGGATTGGGGAAGACCCATCAGGTGTATAAGTATGTGGG  
AACTGATGGATGCTACTTTCAGGGATGTGAGCAGCAAGAATACTACTGTACTTTTGGACCGCTCTGATGATTCTTGTTCAAAA  
GGAGCATATAGAGGTGCCAGCGCGAAGTTGAATGATCAGCCAGCAAGAAGAAGGTTGCTGGCGAACAATTTGTAAAGCAC  
GGAAAAGATCTAAATTCGTCCACGTTTTCAGTTTTTTACTTTGCTTCTTCAATAAAGATTGCTTTGGTAGCTCATGCTTCAGAA  
AGTAGGTAAGAACTCTGATGTGCCTTTATAAACACGCCAATTCAGATCCAGTGGCATGCTATTGTTCATCAGTAACTATCAAT  
TGCTATCATGCTGTCTACCAATTTAGCTGGCATGACAGGACGGAAGGATTTAAACCATTATGCTGGCAGTCAATACAGCACT  
AGTACTAATCAAGATTCTGACACAATCACACTATTAAATTTATGCCAGCATTGCTTACTCCACATTAAGTGGATTGTTCGGAAT  
TTCCGATCTTAATCAAGGCATCAGCAGAGCTGCTCTTGTCTGTCTCTTTGCGAGATAGGAGTATGATTTTCTGAAAATCCTTT  
TTTTTTGTCTTTCAAAAAGCTCTTTGCGAGACTTCAGCTGTTTTTTTATAACATGTATGCTGGTACTTAATTTTGAACATCAAGA  
CATACTTGGACCTTAGATTGCCATGTTTCGCCAACTATGATCTTTTGGCACTGGGAAATCACTGATATCCCTCCAATAAGTGT  
AGCAAATAACGACATCACGCCATGAGTAAAGTTTGGGACCTCGACATGGCAAAGAGATTACAAGAGGTAAACCCCGGTATTG  
TCTGAGATGGTGTGCTACAATTTTGGCCATGTTTGTCTCATCTTTACATTTTAAAGCTTCTTTTTTAAATCATTCACTGATCATC  
ACAAACCAACTGTTAATTCATGGAAATTTATCATAATTAAGTATGCTAAGTATCACCATCACATGCAGCGTTTCCGCAAAAT  
GCCTGAATCCTTTTCTTCAGATGAACCTGAATCATTTCATTTCCGCGAAATTCATAGCGGAAGGAATGGTGGGGGTGGGTGAAG  
AGAGATAAGGGATGGATCATGGATGAACGTCGAACAGAGCAATGGACGGTTGCGATGGGTATCGTGCGAGCATAGATGATG  
GGGCTGGTCACTGCCATGCTTTTCCCCACGAGGGCCCCAACGAGGCACTGGCTTGGCGCGCGCGCGGAGGAGCGGACGCTC  
CCTCGCTTCCCTGTCCCTGGCCACCTCTGAACCGAATCTAACCGCGCCGCCACCTTCGCGCGCGGAAAACCTCCCCCTCCCC  
TTCGCGCGCGCGCGCGGCCACCACCCCATCCCGGCGACAAGGGCTCTATCCGGCTGCTCCGCCAGGAACCCAAATTTTCTCG  
GCGCGAGAAACGCGGGGGGAAAAGGCCAGGACCCCATCCGGTGCGGCGGGACCAATGGGCTCCGGCGAATAGCTCGAG  
CACCTCGAGCTGCGCGGAAAAACCGAGGCGAGCTGTCTTCTCCCTGCGTAATGGCGACGACAGGGGGTAGATAATCGA  
CTCCCAAGCTGAGCCAACATTTCCGTGCCGCGCGTTGAACGCTGCGGTGGTCCCGTCTTGTCTTTCGTTCTCCGTATCGG  
GAACCCGTATTGGGGAACCTGAGAGGTTTCGGCCAGCGGCGGTGGATAGCGAACTGGCGCCTGGTTGCCGCGTTGCTATTCT  
CCGGGAGGAGCGCTCCCGTTGCC

>SsLRR-RLK166

AAACTTGGATGTGCCTTTATAAACACGCCAATTCAGATCCAGTGGCATGCTATTGTCTATCAGTAACTATCAATTCATCATCAT  
GTCTACCATTAGCTGGCATGACAGGACGAAGGATGATTTAAACCTATATACTGGCAGTCAATACTAGCACTAGTACTAATCA  
AGATTCTGACACAATCACACTATTAATTTATGCCAGCATTTGCTTCCACATTAAGTGGATTGTTCGGAATTTCCGCACTTAA  
TCAAGGCATCAGCAGAGCTGCTCTTGTCTGTCTCTTTCGAGATAGGAGTATGATTTTCTGAAAAGCCTTTTTTTTTGTCTT  
TCGAAAAGCTCTTTCGAGACTTATGCTGTTTTTTTATAACATGTATGCTGGTACTTAATTTTGAAGTCAAGACATACTGGAC  
CTTAGATTGCCATGTTTCGCCAACTGTGATCTTTTGGCAGTGGAAATCACTGATATCCCTCCAATAGTGTAGCAAATAAC  
GACATCACGCCATGAGTAAAGTTTGGGACCTCGACATGGCAAAGAGATTACAAGAGGTAAACCTGGTATTGTCTGAGATGGT  
GTGCTACAATTTTGCCCATGTTTGTCTCATCTTTACATTTTAAAGCTTCTTTTTTAATCATTACCTGATCATCAGAAACCAA  
CTCTGTAATTCATGGAAATATCATAAATTAATAAGCTAAGGGTGTGTTTAGTTCCCCATTTTACCCAAAAAATTTGGGTTT  
TGGTCCATCATTTTGCAAAATGGAACCTAAGCACCATGCAAAATTTTGGCAAAAAGGTATCTATTCTCCATTTTGGATTITGGC  
ATCAAGAGGCAAAAAAAAAAAAAAAAAAGCCAAAAAACTCTCACACCTCATGAAAAATTTGGTATTTTGGATGA  
AACTAAACACACCCATAAAATTTTGGCATTTTGCATTTTCATGTTTCCAAAGTAGTTGGTATTTTGTATTTGTATTTCCATGAG  
AAACTAAACACAGCCTAAAGTATCACCATCACATGCAGCTTTTCCCAAATGCCTGAATCCTTTTCTCAGATGAACATCA  
ATTTCAATTCATGACCTACCTCAAAATTCATAGCGGAAGGAATGGTGGGGGTGGGTGAAGAGAAATAAGTTGGTATTTTGTA  
TTTTGCATTCCATGAGGAACCTAAACACAGCCTAAGTATCACCATCACATGCAGCGTTTCCCAAATGCCTGAATCCTTTTCT  
TCAGATGAACCTGAATCATTTCAATGACCTACCTCGAAATTCATAGCGGAAGGAATGGTGGGGGTGGGTGAAGAGAA  
TAAGGGATGGATCATGGATGAACGTCGAACAGAGCAATGGACGGTTGTGATGGGTATCGTGCGAGCATAGATGATGGGGGTG  
GTCATGCCATGCCCTTTCCCCACGAGGGCCCCAACGAGGCACTGGCTTGGCGCGCGCGCGGCGGACGGGGACGCTCCCTCGCT  
TCCCTGTCCCTGGCCACCTCTGAACCGAATCTAACCGCGCCGCCACCTTCGCGCGCGGAAAACTCCCCCTCCCCCTTCGCGC  
CGCGCGCGCGGACCAACCCATCCCGGCGACAAGGGCTCTATCCGGCTGCTCCGCCAGGAACCCAAATTTTCTCGGCGGA  
GAAACGCCCGGGGAAAAAGGCCAGGACCCCATTCGGGTGCGCGGGGACCAATGGGCTCCGGCGAATAGCTCGAGCACCTC  
GAGCTGCGCGGAAAAACCGAGGCGAGCTGTGTTCTCCCTGCGTAATGGCGACGACGAGGGGGTAGATAATCGACTCCCA  
AGCTGAGCCAACATTTCCGTGCCCGGCCGTTGAACGCTGCGGTGGTCCCGTCTTGTCTTTTCGTTCTCCGTATCGGGAACCC  
GTATTGGGAACCTGAGAGGTTTCGGCCAGCGGCGGTGGGTAGCGAACTGGCGCCTGGTTGCCGCGTTGCTATTCTCCGGGA  
GGAGGCGCTCCCGTTGC

>SsLRR-RLK148

GGTGACGATGTCGACATGGAATAGCATGGCCGGCGTTGTTGGCGCCCTCGCGGCGTTCCCAACCCGTGCTTTCGCCGGCGCC  
AGGAGGATCTAGCCGGGTGACTTCTCACGCAAGCGCACATGGCCGCGCCGCGCGCTGACCACCAGCAGCAGCAAG  
GTCACGGCGCGCGCGGGCGCAGAGGTGCGGGGGTGGCCAAAGGTGCTGCTGTTCTTGGCGCGCGTTCGCGCTCCCGGGCCTCG  
TGCTGTACCACCGCGCGCTGCTGGCACCAGGGGACCTCGCTCGATGCCACCGCCTTGGCGTGGCGGCGCGGCGCGCGCGAG  
CGACGACGACACTGTGGCGGACCTGGTGAGTACGTGACCTGCTCCGCGATGCAAGAGGCATATGGCTAAATGATTGTAGTA  
ATCCTCGTTGGATGCCAGCGGCTCGACAGCTTAGCTTCCGGCCATCCGCGACGGCGAGTAGCGCGGCAGCCCCAGCGATGC  
ACTGTGCTTGAGATGGTGGTGGCCATCTCTCCACAGCGCGAGTAGCATGCGAGGACGGACGGGGTCTCGTCCGACCGGT  
GGCCGTATCCACGCTGCCGCTCGTCCGCGCGTGGGCTGCCGTCTCCCGCCCGCTCTCGCTGGTCTACTGGGACGCTCC  
GGCCTTGCTCTCGCCGGCGCCCTTGCTCCCACTTCTCCGACTTCCGAGCTCGCGGTGCGCGCTCCCGGTGCTTTCGCTC  
GCTGTTGGCGCTGTCTCCGCGTGCCTTGTGAGCGCCAGCTCGGAGCGTCAGACTGTAGACGGGTTGCGAGCGGTGATGG  
CTGAACCAACGCATGTCAGCTTCGCCGCTATCGACGCAAGAGTCTCTGCGCGTTGCTTGTCTCCGTCAGGAGGCTGGCCTGG  
AACTGATGTCGATTGCAAGTAGCATGCGTTCTGCCAGTGGCAACAATAACAACATAAGCAACATGCAAAATGTGCA  
CAAGCATGATGGATTAACCAATTAAGTATGATAATAGATTCAAGGTTTCGATGCATCAAGTGCACAAGCAACGCGAGTG  
TCTGTGTCTCCAAGTTCTGTCAGCGCTCCAGGGCTCCCGGCGTGGGTCTTCTTCTCCAAGGGCGGCTCGGCCAAGCAGCAC  
AGGAGGCGGCGCGGGCAAGCGCGGCGCGTGCAGACGGCGGGCAAAACCCCGGGAGGGCAGCAGCGCGCGCGCG  
GGAGGTGGCTCGTGGCAAGGGCCCTTCGGCATCAGAAAGTTGGAGCGTTCCCGGACCGGCGGCTCCAGCGCGCTGAG  
CTTTGCCTGCTCGCTAAAAAAATGAGATTGTGCTTCGATTGGTGCACGCCACGGGAGCCCTTCGATCTCGCTTGGAGG  
GTGGATATACGTGGGAAAGTTACGTGCTGACTTCTTCAAGTAAAGTTACTGAATCCGCGTCCACTACTACCCGTTCCACCAAC  
AGCGGACCGCGCTGTTTTCCCTCTCCCTCCGCTCTCTTTCTCTCTCTTCCCTCTCGTCTCCGTTCCCAACCGCGC  
CGTGTAAAGCACCCCTCTCGAATCCTCTTTTTCAGTTTCTTGTATTCGAATCGCGTGGGTGTAAGCAAAAATCGTCAGGCAAA  
ACAAAAAGGCGCTAAAGCTGTTTGTGTTGCTTATGGTGAATTGCAAGTTTCTCTGCTCTCTCGTCCGCTTTTCTGGCACCTC  
TGAGCTGTTCTGTCTGTTTTCTTCTTTCATTACAGGACGAAGCGGAACTTGAAGGCTGCCGTGGCTGGGTGGAGCTCGCATCG

>SsLRR-RLK163

>SsLRR-RLK178

>SsLRRL-RLK102

CCCTGGGCTTCGGTCAATCGGGCGAGGCGCGAGGGCTTGTGTGAAGTTCAAGGGCGGGCGTGAACGGCTGACCCGGGGCGGGCTGCTGC

GGGA

>SsLRR-RLK82

TCGCTTTGACGCGGCACGTTGACGGCTGCGGGTCCCGGGCAGCTGACCGACGGGGCGAGCGTCCGTCCTCGCGGGCGCC  
CTCGCGCGACGCTGACAGCGGTCCCCGTGGTCCCGACCTCCGCGCGGACACGGGTGCGTTTCCGAACCCCCGCGCGGAA  
AGCAACGGGAGGGAGCGCACACGCGCGCGGGGGTGGGGGCGACCGACCGAACGGCACCGGGCCGAGCGCGGGGAGGC  
CGCGGGATCGGGCGCGGACGGCGGGGATGCTGTGGGTGGGGGATGAGCCCCGTGGGTTAGTTAGGCCTTTGGGGCGCG  
GTGTGAAAGGCGCGCTGGAAAGCAGAGGACGCGGATGGATGGATGGAGCGGGGCTGGGCTGGCCGGGGAAAAAGCAAA  
GCGTGGGGGGCCTTTTCGCCTTCCACACCGCCTTTTCGCGAAATGGCACGCGGGCGCGCCGCGCTGGTGCTCTGCTCCGA  
GTGTTTTCCAGAGTGGGGTTTTGCGGCCGCCACGTTGGTTTTGCTCGTATTCTCAGAAACGACCCCTACCCATGGACCATGG  
TTCCCTTCCCTACAGCTAAGTTACAGCTAACAAATGCAGGCGTATTAGAGTGAGTGGTAATATATTGTCACATGTATAACGTGCT  
AGTACCTTGGTAGCTGCTTGCACGTGCTTGCTCGCATTTCCAAATCAAGTAATGTGCTGCTACCTTTTCTACTAATTTTTTC  
TAGCAAAGAAAAACATAACAATAGCTGCATATGTCATTGAGGTTAATTTACAGAAAGAATTAGGAGAGTTTAGAGGCTATT  
AGCTCCTTGATACACTTGGTGGTTGAGCAAAGTAGGGTCCAATTTATGCACATCTCTAGTGATTGTGAACGAAACTAAGG  
GTCTGTTTTGACATGATTTTTGATTCTGTACGACCTTCTGCAGAGAAGACAGATGACTCCTATCAAACACTATAGGAGGAGAA  
GTCGTTTTCTAGCGGATACCAGGCCATCCATCGGTCTGAGGAACATTGAGGATGAGCATTGCCAAGCGGGTCTTAACATATA  
CCAATACGTCATAATATAATGCATATCAACGAATAACCTCTTCTACTGCCCAAATTTTCCATTATATTCTCTTTGATGTTATGGT  
TGCATAGTATACCTCTCTCTTATCTTCCAACCTGACATTTGCAATTTTTCTTATGACCACATCCCTTTTATATATTGATGCT  
TTCTTTTGACACCTGGGATAGAATTGATCGTTCATTTCTTTACACTATATTTAAGTATAATATGATCTTCTATACTATTGGTC  
CTTGCCAAATTTATCAAGCCACTTATCAATTAACACAGACGTGATATCCTTGACAACATCTTCAATGATGCTAATTTTCTCATT  
TTAGAGTTTATCTATGCACACATCTTTTTTTTTCTAGGTAACACGGGAGGTACGACGGACACCAACAACTGGGTATTAGTTG  
TTTAAGACTAGAGCAACTATCAACACAGACTTTTTATGTTTCCAATTTAAGATAACCTAATTAGTAGAATTTAGTAGATTGCGC  
TTTATCTCAGAATCTTACGGTGCTTAGTGCCTATGATTGACATAACATTCACCTTTTACCTACATTGCTCGGTAGAAATCT  
AGGAAGAATTTCCATATCTAACCAGCAGCCCAAAACACATCCCAATGCTATTACGGTGCGTGCAATTTGAGGGTAACCGGA  
GGCGTTTCGCCGTAAACCCACACTGTGCGGGGTGCAACCCAGCGCTGGGTCCACATGCTCCAGCTCCCAAGCCAA  
GCAACCCCCACCCCCACCTCCATCCGAGGGCGCAAAGCGCAAAACCCCCACCCACCCCGAGGTCCCCCTCGCAAAAGA  
TCCACGCGTGCCCCGTCCCTCTCGCCGCCGCCGCCGCCACACTCTTACTACACTCCACCGCGGGCCAAGCACTCCGC  
CACTCCCCCACTGTCCCGCCTCAA

>SsLRR-RLK65

ATATCTCACAAACAAAGTCAAGTTTGGACAAAAAATTTTACAAGGTTGTGTATCATCATATCATCTATATATGTAATTTTTTGGG  
TGAATTTAGATGACTTTTTTACCATGGTTTATATGGGTTTTACGGAAGGGTGTGGTTTCCACCTGATACGTTGCCTTTCCATA  
GTGGGGTTTTGCGGCCGCCACGTTGGCTTGCTTGCTTGTATCTCAGAAACACCCCTACCCATTGACCATGGTTCCCTTCCCTAC  
AGCTAAGTTACCTAAGAAATGCAGGCGTGTAGAGTGAGTGGTAACATATTGTACATGTATAACGTGCTAGTACCTTGGTA  
GCTGCTTGCATGTGCTTGCTCGCATTTCCAAATCAAGTAATGTGCTGCTACCTTGTCTGTCTCTACTAATTTTATCTAGCAAA  
AAAAATAAATTTAGCAAAAGAAACATACACAGCAGTTGCATATGTCGTTGAGGTTAATTTACGAAAGAATTATGAGA  
GTTTAGAGGCTATTAGCTCCTTGATACACTTGGTAGTTGAGCAAAGTAGGGTCCAATTTACGCACATCTTAGTGATTGTGC  
GATGAAACTAAGGGTCTGTTTGGCATGATTTTGACTCTGTACGACCTTCTGTCAAGAAGACAGAGGACTCCTATCAAACAC  
TTTAGGAGGAGTCTGTTTTCTAGTGATATTGGATAGTATAAGCCGGACACAGGCCATCAATTGGTCTGGAGGAGCATTTGAG  
GATAGCATGTCAAAGCGGGTCTAAGATTACGTTGTTTTCTTCGCAAGAGAACCTAAGTACCAATACGTCATAGTATTGCAATTTT  
ATATCAATGAATAACCTCTTCTACCGCCCCAAATTTTCCATTATATTGATTATATTCTCTTTGATGTTATGGTTGCATAGTCAATA  
CCATCTCTTCTTATCTTCCAACCTGACATTGCAATTTTTTTATGACCACATCCCTTACTTATATGCTGCCTTTCCTTTTGACACC  
TAGGATAGAATTGACCGTTCCATTTCTTTACACTATATTTAAATATAATATGATCTTCTTACTATTTGGTCTTGGCAAATTTATC  
AAGCTGCTTATCAATTAACAGACGCTGTATATCTGCACAACTATCTCAATGATGCTAATTTTCTAATTTAGAGTTTATCTATGC  
ACACATCTTTTTTAGGCAATACGGAAGGTGTGACAAACACCAACAACTGGGTATTAGTTGGTTAACACTAGAGCAACTAT  
CAACCGCAGACTTTTTATATATGTTCTAACTTTAAGATAACCTAATTTAGTTATTTCGCCTTTATATCAGAATCTTATGGTGCTTA  
GTGCCAATAATTGACATAACATTCACTTTTTACCTACATTTGCTCTGTGAGAATTTCTAGGGCCTTGTGTAGATTGCAATTTTT  
TTGAATCTTTGGCTACTGTAGCACTTTCGTATGTATTGATAATTAGTGTCCAATCATGAACCTAATTAGGCTCAAAAGATTGCT  
CTCGTGATTGCAACAACTGTGCAATTAGTTATTTTTTATCTATATTAAATGCTCCATACATGTGTCCAAATTTGATGTGAT  
GAAGAGAGAGTGTAACATTTGGAATTTGGAGTGACCTAAACAAGGTTTAGGAATAATTTCCATATATAACCAGAGCCCC  
AAAACACATCCCAATGCTATTACGGTGCCGTGCAATTTGAGGTTAACCAGGAGGTGTTACCCGTAAACCAACCACTGTGCGGGGT  
GCAACCCATCCGCTGGGTACATGCTCCAGCCTCCAAGCTTCCAAACCAAGCAACCCCCCACCACCTCCATCCG  
AGGGCGCAAAGCGCAAAACCCACCCACCCCGAGGTCCCTTCGCAAAAGATCCACGCGTGCCCGGTCCCTCTCGCCGCC  
GGCCGCCGCCGCCACACTTTACTACACTCCACCGCGGGCCAAGCACTCCGCCACTCCCCCACTGTCCCGCCTCAAT

>SsLRR-RLK103

GGGGTGCTGGATGGATGGAGCGAGGCTGGTCTGGCGGGGAAAAAGCAAAGCGTGGGGGGCCTTTTCGTCTTCCACACCGC  
CTTTTCGCGAAATTTGACGCGGGCGCGCGCGCTGGTGTCTGTCTCCGAGGCCTCTTGTTTAGTTTCAAAATATTTTCGCAAA  
AAAAACAGTACATTTTCTGTACATCGAATCTTTAGACATCTATAGTATTAATAATAGATAAAAAAATAAATAACATTAAC  
AGTTTAGATGAAATGGACGAGACGAATCTTTAAGTTTAATTAAGCCATGATTGGACACTAATTACTAAATAACAACGAAAAA  
TGCTACGGTTATATTTTCGCAAAATATTTAGGAACATAACGAGGCCGAGTGTTTTACAGAGTGGGGTTTTGCGGCCGCCCA  
CGTTGGTTTGCTCGTATTCTATAAACGACCCCTACCCATTGACCATGGTTCTCTTCCCTACAGCTAAGTTTCAGCTAACAAAT  
GCAGGCGTATTAGAGTGAGTGGAACATATTGTCACATGTATAACGTGCTAGTATCTTGGTAGCTGCTTGATGTGCTTGGCTG  
CATTTCAAATCAAGTAATGTGCTGCTACCTTGTCTTCTACTAATTTTTTCTAGCAAAAAAACCATTTCTAGCAAAAGAAAAA  
ACATAACAATAGCTGCATATGTCATTGAGGTTAATTTACGAAAGAATTAGGAGAGTTAGAGGCTATTAGCTCCTTGATACA  
CTTGGTGGTTGAGCAAAAGTAGGGTCCAATTTACACACACTCTAGTGATTGTGCGACGAAACTAAGGGTCTGTTTGGCATG  
ATTTTGGCTCTGTACGCGCTTCTGCAGAGAAGACAGATGACTCCTATCAAACACTATAGGAGGAGAAGTCGTTTTCTAGTG  
GATACCAGGCCATCATTGGTCTGGAGGAACATTGAGGATGAGCATTGCCAAGCGGGTCTTAAGATATACGATTTTCTTCAG  
CGGAAACTAATAACAATACGTCATAATATAATGCATATCAACGAATAACCTCTTCTACTGCCCAAATTTTCCATTGTATTGATT  
ATATTCTCTTTGATGTTATGGTTGCATAGTCATATAACCATCTCTTCTTATCTTCCAACCTGACATTTGCAATTTTCTTATGATCAC  
ATCCCTTGTTTATATGCTGTCTTCTCTTTGACACCTGAGATAGAATTGACCGTTCATTTCTTTACACTATATTTAAGTATAATA  
TGATCTTCTTACTATTTGGTCTTTGCCAAATTTATCAAGCCACTTATCAATTAACACAGACGTGATATACTTGACAACATCTT  
CAATGATGCTAATTTTCTATTTAGAGTTATCTATGCACACTGTGCGGGGTGCAACCCAGCCGTCTTTTCTAGGCAATACGGGAGGACCGGACCC  
AACAACTGGGTATTAGTTGGTTAACACTAGAGCAACTATCAACCACAGACTTTTTATGTTCCAACCTTAAAGATAACCTAATT  
TAGTAATTTTAGTTATTGCGCTTATCTCAGAATCTTACGGTGCTTAGTGCCTATGATTGACATAACATTCACCTTTTTCACCTAC  
ATTGCTCGTGTAAGAAATCTAGGAAGAATTTCCATATCTAACCAGCAGCCCAAAACACATCCCAATGCTATTACGGTGCGT  
GCAATTTGAGGGTAACCGGAGGCGTTGCGCGTAAACACACTGTGCGGGGTGCAACCCAGCCGTGGGTACATGCTCCAG  
CCTCAAGCTTCCAAACCAAGCAACCCCCACCCACCTCCATCCGAGGGCGCAAAGCGCAAAACCCACCCACCC  
GAGGTCCCCCTCCGCAAAAGATCCACGCGTGCCCCGTCCCTCTCGCCGCCGGCGCCGCCGCCACATTCTTACTACACTCCAC  
CGCGGCCAAGCACTCCGCCACTCCCCACTGTCCCGCTCAATGCGACGGCGGCTCCGCCGCCGCCGCCACCGACT  
CCGCCA

>SsLRR-RLK83

CTGACCGACGGGGCGAGCGTCCGTCCTCGCGGGCGCCCTCGCGCGACGCTGACAGCGGTCCCGTGGTCCCGACCTCCGC

CGGGACACGGGTCTGCTTTCCGAACCCCGCCGCGGAAAGCAACGGGAGGGAGCGCACACGCGCGCGGGGGGTGGGGGCG  
ACCGACCGAACCGGACCGGGGCCGAGCGCGGGGAGGCGCGGGATCGGGCGCGGACGCGCGGGGATGCTGTGGGTGGGGGA  
TGGAGCGGTGGGTAGTTAGGCTTTGGGGGCGCGGTGTGAAAGGCGCGCTGGAAAGCAGAGGCGAGCGGATGGAG  
TGGAGCGGGTGGGCTGGCCGGGGAAGCAAGCGTGGGGGGCCTTTTCGCCTTCCACACCGCCTTTTCGCGAAATGG  
CACGCGGGCGCGCGCTGGTGCTGTCTCCGAGTGTTCACAGAGTGGGGTTTCGCGGCCGCCACGTTGGTTTGCTC  
GTATTCTCAGAAACGACCTCACCCATGGACCATGGTTCCTTCCCTACAGCTAAGTTCAGCTAACAAATGCAGGCGTATTAG  
AGTGAGTGGTAATATATTGCACATGTATAACGTGCTAGTACCTTGGTAGCTGCTTGACAGTGTCTTGCATTTCCAAATCA  
AGTAATGTGCTGTACCTTTTCTCTACTAATTTTTTCTAGCAAAGAAAAACATAACAATAGCTGCATATGCTATTGAGTTAA  
TTTCAGAAAGAAATTAGGAGAGTTAGAGGCTATTAGCTCCTTGATACACTTGGTGGTTGAGCAAAGTAGGGTCCAATTTTAT  
GCACATCTCTAGTGATTGTGCAACGAAACTAAGGGTCTGTTTGGCATGATTTTGATTCTGTCAGCACCTTCTGCAGAGAAGA  
CAGATGACTCCTATCAAACTATAGGAGGAGAAGTCGTTTTCTAGCGGATACCAGGCCATCCATCGGTCTGAGGAACATTT  
GAGGATGAGCATTGCCAAGCGGGTCTTAACATATACCAATACGTCATAATATAATGCATATCAACGAATAACCTCTTCTACTGC  
CCCAAAATTTCCATTATATTCTCTTTGATGTTATGGTGCATAGTGCATACCATCTCTTCTTATCTTCCAACACTGACATTTGCAT  
TTTTCTATGACCACATCCCTTGTATATAGCTGTCTTTCTTTGACACCTGGGATAGAATTGATCGTTCCATTTCTTACACT  
ATATTTAAGTATAATATGATCTTCTATACTATTGGTCTTGGCCAAATTTATCAAGCCACTTATCAATTAACACAGACGTGATATC  
CTTGACAACATCTTCAATGATGCTAATTTTCTCATTTTAGAGTTTATCTATGCACACATCTTTTTTTTTCTAGGTAAACCGGGA  
GGTACGACGGAACCAAAACAACTGGGTATTAGTTGGTTACAGCAACTATCAACCCACAGACTTATGGTTTCCAAT  
TTAAGATAACCTAATTTAGTAATTTAGTTATTTCGCTTTATCTCAGAATCTTACGGTGTCTAGTGCCTATGATTGACATAACATT  
CACTTTTTACCTACATTGCTCGGTAGAAATTTAGGAAGAATTTTCCATATCTAACCAGCAGCCCAAAACACATCCCAAT  
GCTATTACGGTGCCTGCAATTTGAGGGTAACCGGAGGCGTTCGCCGTAAACCACTGTGCGGGGTGCAACCCAGCGCTG  
GCTCACATGCTCCAGCTCCAGCTCCAAACCAAGCAACCCCAACCCCAACCTCCATCCGAGGCGCAAGGCGCAA  
AACCCCAACCCAGGAGGTCCTCCGCAAAAGATCCACGCGTCCCGTCCCTCTCGCGCGCGCGCGCGCGCGCACAC  
TCTTACTACACTCCACCGCGGCGCAAGCACTCCGCCACTCCCCACTGTCCCGCTCAATGCGACGGCGCGCGCGCGCGCGC  
GCCGCGCCACCGACTCCGCC

>SsLRR-RLK17

ATACATAATGCTATTGTGTTCCGTAATTTTACATGGAAATCCTTAATGTTGTTGTTAAAGTGAACAACTGTACAACCATATTTA  
CACAATAATGAATTTCTTTTTTAATATAATTTCTGATGTATAAGAATTTATTTTTTCCCATTGCAATGCACGGCAAGTTTGC  
TAGTTATCTGTTTATGTACTAAATTTGCATAGTTGAAATGTGATCGATGGATGCATATCAATAGTTTCTATGGGAGTTATATC  
GTTGTTGTGTTTACAATTATCTAAAATAAGAAATTAGTGGTCAAATTTATATCTTGTAGATTGTTTCAAGCAAAAGGCCACTT  
ATCGACTGGAGAGACTATCTGTACTCCCTTCTTTCAAATTTGTTACTCATCTTGGTTTCTCCAGATATATAGCTTTTGATATAT  
GTATCTACAAAAGCAAAACAACTTACAATTTAAATGGAAACGAGTATTGTTTAAACCAAAAAGTAAAGAAAATAATATAAAAC  
TGGGAAATAATAAAATTATAAAACGGCTTATGCCTATTACTTCTTTTAAACCAAGTATCTGTGTCAAGTTAAAAATGGCCAAT  
GATGCATACATAATCTTCTCATTCTACATTCAAGAGAAAAGTAAATCATCATATTAATAAAACAATTAGCAGAGCCAATGTAAC  
GCCCCAAGGTAGCGTTCAAGTTGCCAAAAATTTGGCAAAATGGCACTGTAGCCACTTTCGTTGTTATTTGGTAATTAGTGTCCA  
ATTATGGTCTAATTAGGCTTAAAGATTTCGTCTCGTCTATTTCGTCTTAACTGATATAATTAGTTTATTTTATCTATATTTAATG  
CTTCATACATGTGTCCAAAGATTTCGATGTGACAGGGAATCTGAAAATTTTGCAAAATTTCTTGGGAACTAAACAGCCCCCA  
ACTCAGAAAGACGGCTAAGGTCCACTATACAGTTTGAATGAACACTACCTGCTAATTAACCTCTTTCGCGCTTTCATCTCGGT  
TCACGTCAAGTATCGGAGTCCGAGTTAAAGCCTCCAGTCCAGGCTTTAACTTGCCTCAGCTCTCGTCTAACTTCCCGCA  
TGTACTGAACCTTTATAGCTATGCTGCTACAGTATCCTAAGGTACAGTGTGCGAATTTCGGTCCAGCCCCAAGTGTCCAATGGA  
CTGGGTCTGACAGCCATCAGGTAGCGAAGTACTTCTGGTACCTCGACGAGATACTTCCGTACTGTACTAACAGAGTACTCCC  
TCCGTCTAGAAAATATGTAATCTAGCACAGTGTCTATTGTTTAGTATCTCAAGTTCAATTAATTATAGATAAAAAATATCAATA  
TTTATGATATCAATAAATATCATTAGATTCCATTACGAAATGTATTTTCTTAATAAATTAATTTAAATCATAAATGTGAATAGTAT  
TCACTAGAAATTTGGTCAAACGTAAACTACTTTTAAACGGCACACATGCATGTTTCTTGGACGGAGGGAGTATCAAGCAATT  
CTGTTACGCGCTCTCCCTAAATTCGTTTGCACCAATGAAACATGGGCACGAGGGGTGAACGAGTCAACAGCCCCAAAGCA  
TGGGACGGCAGGTCAGCCACCTCCATCATCAACAAAACCAATCTTTTCAAGGGCAAAATCGTCACGTCAAAGTACCTTT  
AAAAATCAAGAGAATAAAAAAGAGTTGTGCTGGACCTCGACGAGCAGGGGACGGTGGCGGAGAAGAAGAAGAGAGTGG  
AAGGAAGCAACAGAACGAAGACCAGCACCAACGAGACCAGAGGAGAGAGAGAAGAGAGATCAGAGAGTACAGAGAG  
AAATTTGCCGGCAAAAACCTTGCTTCTCCCTCCGGAATCTAGCTAATTACTTTCCGGTCTCTCTCCCCATGTAAGTCTCCC  
CTCGTCGCTGCCTGCACCTACCGGAAGCGAAGCCTCCTACAGTTACAGTCCACATCCGGGTGCGCGCCGTGCGCTAGCTAGC  
CGAT

>SsLRR-RLK33

TGCTCGTCATCAGCGACGAGCGTGCCAGGACAGAGGAGGCCGGCAAGGACGACGCGTGGTGACTTGTGTAGCACAAACAGT  
GGCAAGTTTCGGTTCCGCTGCCGTGCGGCGCCAAGCTGGACAGGTGCACATGTTAAGAAAGCTGTAGGTAAGGATCGTCC  
AGATCTGGTTGATAGATCCGTTCAATTGCTTGTCCGCATGCATGACGCGATGACAATGATACAGAGGGTTAAGCACTCAAGTT  
CTAATACAAAGTCTTCTGCTGTAGGATTAGAAGAATAAACTGCTATCTATATCTATTTCATCGTTTGTGTGCTAATAAGTG  
GTGTTTGTGATGTTCAAGTGCTTCAAGTTGGCATGGCTGGCTGGGCAATACAACTCGCAAAATCATAAATGTGAATAGTAT  
TGGCAGATGGTAATGGGAGGGAACAACCCCGTTTACTTTCATATATAATCGAAGGAGAACAATACATAATGCTATTGTGTTTCG  
GTAATTTTACATGGAAATCCTTAATGTTGTTGTTAAAGTGAACAACTGTACAACCATATTTACACAATAAATGAATTTCTTTT  
TTTTAATATAATTCTGATGTATAAGAAATTTATTTTTTCCCATTGCAATGCACGGGCAAGTTTGCTAGTTATCTGTTTATGTA  
AATTTGCATAGTTGAAATGATACGGATGGATCTATATCAATAGTTTCATTGGGAGGTATATCGTTGTTGTGTTTACAAATTAT  
CTAAATAAGAAATTAGTGGTCAAAATTATATCTTGTAGATTGTATCAAGCAAAAGGCCACTTATCGACTGGAGAGACTATCT  
TGTAATCCCTTCTTTTCAAATTTACTCATCTTGGTTTCTCTAGATATATAGCTTTTGATATATGATCTACAAAAGCTAAAAACG  
ACTTGCAATTTGAATGGAATGAGTATTGTTTAAACCAAAAAGTAAAGAAAAATAATAAAAAACATGGGAAATAATAAAATTTCAA  
AACGGCTTATGCCTATTACTTCTTTTAAACCAAGTATCTGTGTCAAGTTAAAAATGGCCAATGATGCATACTAATCATTTTCTC  
ATTTCTACAGCCAGTCTCAGTTTCAAGAGAAAAGTAAATCATCATATTAATAAAACAATTAGCAGAGCCATTGTAACGCCCA  
CTCAGAAAGACGGCTAAAGTCCACTATACAGTTGAATGAACACTACCTGCTAATTAACCTCTTTCGCTTTCGTCCTCGGT  
CATGTGCAAGTATCGATCCGGAGTTAAAGGTTTCCAGATTACGGCTTTTAACTTGCCCTCAGCTCTCGTCTAACTTCCCATAT  
GTACTAACTTTGTAGCTATGCTGCTACAGTATCCTGAGGTACAGTGTGTTGTAATTCGGTCCAGTCCAACCTGGTCCAATGGAC  
TGGGTCTGACAGCCATCAGGTAGCGAAGTACTTCTGGTACCTCGACGAGATACTCCGTACTGTACTAACGGAGTATCAAGC  
AATTCTGTTACGCCGTCTCCTCAAATTCGTTTGCACCAATGGAACATGAGCAGGAGGGGTGAACGATCAACAGCCCCAA  
AGCATGGGCAGGCAGCCCGCAACCACTCCATCATCAACAAAACCAATCTTTTCAAGGGCAAAATCGTCACGTCAAGTAC  
CTTTAAAAATCAAGAGAATAAAAAAGAGTTGTGCTGGACCTCGACGAGCAGGGGACGGTGGCGGAGAAGAAGAAGAGAG  
CTGGAAGGAAGGAACAGAACGAAGACCAGCACCAACGAGACGAGGAGAGGAGAGAAGCCAGCGAGAGATCAGAGAG  
TCACAGAGAGAAATTTGCCGGCAAAAACCTTCTTCTCCCTCCGGAATCTAGCTAATTAATTTTCCGGTCTTCTCCCCATG  
TAAGTCTCCCTCGTCTGCTGCTGCACCTACCGGAAGCGAAGCCTCCTACAGTTACAGTCCACATCCGGGTGCGCGCCGTGCG  
GCTAGCTAGCCGGATATGG

>SsLRR-RLK172

TAGTACGTCTACTACTTCGGTTAGCAATGCAACAGATGGATGGAGCCGAGCCTTGCATCGCCCGGCCGTGCTGTTGGAGCCA  
AGACCTGCACGTGTTCTGCCCCGACGTGCTGTACATTACTCGGGCAAATTTTTTATCTTAAGTATTTCTAGACTATTTAAGTGA  
TCAAACAGTAAGTCACTGTAAAACTCTAGATTTCTCAATATCCAAGTCATAGAAAAAAACCAATTTGTCAATTTCCATAGC

TCGGCGCCGTAGTAATCGGTGCCGAGCTTGGCGCCAAGATCTACGGCGTCGAGCTCAAGACACGTCGCCCCACGCAGGTA  
GCCACGTCAGCGACACCTAGAAAATAACCCCTGGACTACGGCGCCAAGGATGGGTCTATTTTTGACAGGACCAGGGGGCGAA  
GCCAGGATATATCATCTCGGGGTCAAGTGGAAAGTACAAAATATGGTTTCGTTTGGCAGAACTTTAGCTCCGGTTCTTTTGG  
TGGCTCGTAGCAAGGAGCCCTGCCAAATGGACCTTAAAAAATGGCTCCTTGAAGGAGTCTGGAGAAGCTGCAGCAAAG  
AAAAAATGGTTTCTCGTGACTTCTCCTCACAACATAACACAAATTACTACAAAACCTACTACTAGAGTTGTTTTGGCCAA  
ACATGTTTTAAAAACGGCTCTAGCTTCACATGGGGAGCCAGAGCCGAAGCCTTTTAAAGAGAAGCCGAGCCCTAGCAAAACA  
GGTCTATAACTTGGCATAATTTATACAATAACATGTATAACATAACCCCTACAATGGATAAGATAGAAGCAACAAAATGACATGT  
TTGCTTTACGATTATATTAGACCTTGCTATGGTATTCCTGTCCCACTTAAGAGGTAATATTCAATTAATTTGAACTCTTGATT  
TTTGTTTTTAAAAATGCATGCAATAAATAAATACTCCCTCCGTATCGGATTTAGAAGTTGTTTAGGACAGCAACACGGTCTCC  
AAAACACAACCTTTGACCTCTGTTTTTATAAAAAAATATTATGGAAAAGTGATATATGTATACTTTTATGAAAAGTATTTTCAA  
GACAAATCTATTATATAATTTTTACATTTGCAAACTCAACAACTTAAAAAGTTATTGATGATTATATTCTCAATGTTTGACCCA  
AACCTTGTCCTCAACGATTTCTAAATCTGATACGGAGGGAGTAGTTAAGTTATTTTTCTTTTAGAAAAGAATATCCCAGAAAT  
CTTGACTCTTAAGTCCCTATGCCTCCGTCTTCGTGTTCTGTTCTATTGACATTTCCGTCTCCCGTCGAGCCACCAGGGCC  
ATTCAGGGTCAGGGCACAGACATGAGAAAAGCCGACAAGGCAAGAACATCACAAGGACGGGAAAGGCCGAAAGC  
GACTTGGAGCGTTGGACAACCGGAGTGATCAGAGTAGAAGGGGATTAAATTGGACTGCTACTGGGCTGCTGCATGCGTTTTT  
TTACTTCCATTAACTTATCATTAGATGGGCCATCGGGGTGTCGGGGTCTCGAATATTATTTACCGGGGTACAAAATGGTGAAA  
AATCGCAGGGCACAGGAGTTAGCGGAAGGTCTGGGTGGGACGACCCCGACGCCATAACGTAGTCCCATCTGAGC  
AGGACCACCAGAGGCACTTTTGTGAAAATCTTTTTTAAAAAAGGTCAAAAAGCTAAAAATTTGAACGCAGCGATGAACAA  
TTGAACACCACAGAGCCAAAAGCCAAGCATCCCGTCGCACATATGCCCCCTCGCATTTCTGAAATCACTCCACAGTCTCTC  
ATTCTGACCTATGAAAGTTCAGCCCCCGGGCGTGGGCCCCACCTCGTGTACCAGTACTTGTCTCCGAGTCCATCGACACTT  
CGACAGCAGTCGGCAGACTCGGAGAGTCACTCGGTGCGCACTGACTGACCCAGACAAAAGCTCCCCACCACCGCTCCCGTT  
CCGCTTCGGCGACTGGCCGGAG

>SsLRRL-RLK97

CGCTTAGTGAGGTAGTGTGTCCCAACCATAAGCAACGTGAAGTTATGCATGCGAGCTATGTGTAACATCATGCAAGTGTTA  
CTTTTCATGGCAAAATTGATAATTAAGTATCTGTTTTTGTGCGTATGACCGAACTACGCAACACAAAAGAGATACATCTCTAGAT  
CGCTTGTCGAGAGAAATATGTCTCGAATCAAAGAAAAGGCACTGACGTTGTTGAGTGCAAGCCATCAATATGCCCCAGA  
ATCTAGAGTACAACACCGCCTAATAAGGTAGTGGGTCCCACGACTCCATGCACCGCTAACATGGAGTCCGATGTAAGTTATGT  
GTAACCTATGCCAAGTGTGCTCCACACATAAAGATATAATTAAGTATTATTATTATTGTTGTCATGGCTGCATCAACATAA  
AAGGTAGTGCTCGTAATGAGGCTAGGCAAATAAATTGCATTTGAGACCCCTCTTTGGGATTAAAAGAATGAAGGGGTGACAA  
GAAAATTAGAAAAAATAATAGGGTTGAAGGGCCAAAGGTTCACTTTTATTGTCCCTAATAAGCTTTATTCTAGATTACCCCT  
GGTTTTGCTCTTATAGTTCTCTCTCATACTACCCATGTTGATGTTGGCTAAGCAAGAACTTCGTAGAATATACTAAAAATAAAT  
TATAGCATTTTATTATGCCCCGTTTACCATCGACGTTTTTGGACTGAAAGAATTTACATGAAAGAATTATAAGTTTTCTTACT  
GTGACGTAGTTGTGCCACACATGCTTTGAATCATATTAATAAAAAATCCTTAACTACCATGGACACTTGTATGGATGGAAGGTG  
ATTGAGCTTAATAAAAGGAAATGGATGTCAAAACTACAATACATGCTTCTGGAGCTTCTTGATAGGCTAACTCCTTGTAACA  
AAAGTCTTCCAGATTGGAGAATGTAAGCAATAATATGATGACCTACTGTTTCATTGCTAAATGTCAATCAAGAAAATATAG  
AATGACAATGCATCTCAAGATTATGGGCGATTAATTCATCTTAACCAATGCCAAGATTCCACACTATATCCACCCTAGCTTCT  
TTTTCTGATGATTCATTATGTCGTTATAACGAAAATGGACAATTTCTCTGTTGGGCTCACATGCCCATCTTAAATCTCACACATC  
CAGTGGGCGGTAAATGAGCCGTGATCTCTAGACTAGTGTGGTGTGCTTATCCATAGCCTAGTGATAAGAGGTGCTTTGTGCTAT  
GTGATGGAGAGTACATGTTATCCGAGAGTCGTGGTGAAGGGACTTCTTGTAGTGGTACGGTTTGGGCTTCGAGTTTATGGG  
CCGATGCTATTGGACCGCGGCCCTCTAGAAAAATATGGGCTACTTTTCGTAACATTTGAATATATGAAATTTCCGCGCCAAGACA  
GTTATTCACCTTTTAACTCATACAACTAGCCACTCTTTCGAGCAATGTGCAAAATAGTTTATAGCATCTACCAACGAATTTG  
ATAATCATATTTTCAAAAATAAATGATTAGGCCACAACAAAATGATTGCAATTCCTTCCACCTCGGTAAATTTCTCAAACTAC  
GATGGAATTTCCAAAATGGGTGACCATGACCAAGCAACGAAAAGTAAACACCAACAAGTCACAGCAGGTGAATGCTGCG  
TTGAACAGAAGAGGACGACGCGCAGCAGCCGAGGAAGCCGCGCAGCAGCAATGAAACAATTGAACACCAACAAAACCG  
ACCATCCCCGTCGCACCTCGCCCCCTCCGATTTCTGAAATCACTCCACGGTCTCCGTTACCAGGCTTGAAGAGTTCAAGT  
TCAGCCCCGGGCGTGGGTCCACCGCGTGTACCAGTACTAGTCTCCAGTCGGCAGACTCGGGAGTCACTCGGTGCGCACT  
GACAGACAAAGCTCCCCACCACCGCTCCCGTCCCGCTTGGCGCTTCGAGGAGGTCCAGGTCCAGGTCCGCGTCTCGTTCGG  
CGACTGGCCGGAG

>SsLRRL-RLK119

ACCACCGCTTAGTGAGGTAGTGTGTCCCAACCATAAGCAACGTGAAGTTATGCATGCGAGCTATGTGTAACATCATGCAAG  
TGTTACTTTTCATGGCAAAATTGATAATTAAGTATCTGTTTTTGTGCGTATGACCGAACTACGCAACACAAAAGAGATACATCTC  
TAGATCTTGTGCGAGAGAAATATGTCTCGAATCAAAGAAAAGGCACTGACGTTGTTGAGTGCAAGCCATCAATATGCC  
CAGAATCTAGAGTACAACACCGCCTAATAAGGTAGTGGGTCCCAGACTCCATGCACCGCTAACATGGAGTCCGATGTAAGT  
TATGTGTAACATCATGCCAAGTGTGCTCCACACATAAAGATATAATTAAGTATTATTATTATTGTTGTCATGGCTGCATACTCAA  
CATAAAAGGTAGTGCTCGTAATGAGGCTAGGCAAATAAATTGCACTTTGAGACCCCTCTTTGGGATTAAAAGAATGAAGGGGT  
GACAAGAAAAATTAAGGTTGAAGGGCCAAAGGTTCACTTTTATTGTCCCTAATAAGTTTATTCTAGATTATA  
CCCTTGGTTTTGCTCTTATTAGTTCTCTCTCATACTACCCATGTTGATGTTGCCTAAGCAAGAACTTCGTAGAATATACTAAAA  
ATAAATTATAGCATTTTATTATGCCCCGTTTACCATCGACGTTTTTGGACTGAAAGAATTTACATGAAAGAATTATAAGTTTTCT  
CTTATTGTGACGTAGTTGTGCCACACATGCTTTGAATCATATTAATAAAAAATCCTTAAGTACCATGGACACTTGTATGGATGGAA  
GGTGATTGAGCTTAATCAAGAAAAATGGATGTCAAAACTACAATACATGCTTCTGGAGCTTCTTGATAGGCTAACTCTTGT  
AACAAAAGTCTTCCAAGATTGGAGAATGTAAGCAATAATATGATGACCTACTGTTTCATTGCTAAATGTCAATCAAGAAAAT  
ATAGAATGACAATGCATCTCAAGATTATGGGCAGTTAATTCATCCTAACCAATGCCAAGATTCCACACTATATCCACCCTAGC  
TTCTTTTCTGCGATTCTATTATGTCGCTTATAACGAAAATGGACAATTTCTCGTGGGCTCACATGCCCATCTTAAATCTCACA  
CATCCAGTGGGCGGTTAATGAGCCGTGATCTCTAGACTAGGTGGCTTGATCCATAGCCTAGTGATAAGAGGTTGCTTTGTC  
GTATGTGATGGAGAGTACATGTTATCCGAGAGTCGTGGTGCAAGGGACTTCTTGATGTTGACGGTTTGGGCTTCGAGTTTAT  
GGGCCGATGCTATTGGACCGCGGCCCTCTAGAAAAATATGGGCTACTTTTCGTAAATTTGAATATACTAAATTTCCGCGCAAGA  
CAGTTATTCACCTTTTAACTCATACAACTAGCCACTTGTGCAATGTGCAAAATAGTCTATAGCATCTACCAAAACGAATTG  
ATAATCATATTTTCAAAAATAAATGATTAGGCCACAACCAAAATGATTGCAATTCCTTCCACCTCGGTAAATTTCTCAAACTAC  
GATGGAATTTCCAAAATGGGTGACCATGACCAAGCAACGAAAAGTAAACACCAACAAGTCACAGCAGGTGAATGCTGCG  
TTGAACAGAAGAGGACGACGCGCAGCAGCCGAGGAAGCCGCGCAGCAGCAATGAAACAATTGAACACCAACAAAACCG  
ACCATCCCCGTCGCACCTCGCCCCCTCCGATTTCTGAAATCACTCCACGGTCTCCGTTCCAGGCTATGAAAGTTCAGTT  
CAGCCCGGGCGTGGGTCCACCGCGTGTACCAGTACTAGTCTCCAGTCGGCAGACTCGGGAGTCACTTGGTGGCCACTGA  
CAGACAAGGCTCCCCACCACCGCTCCCGTCCCGCTTGGCGCTTCGAGGAGGTCCAGGTCCAGGTCCGCGTCTCGTTCGGC  
ACTGGCCGGAGA

>SsLRRL-RLK76

AATTAAGTATTTTATTATTGTTGATGGCCTGCATACTCAACATAAAAGGTAGTGCTCGTAATGAGGCTAGGCCAAATAAATTG  
CATTGAGACCTCTTTGGGATTAAAAGAAATGAAGGGGTGACAAGAAAATTAGAAAAAATAAATAGGGTTGAAGGGCCAAA  
GGTTCACCTTTTATTGTCCCTAATAAGCTTTATTCTAGATTACCCCTGGTTTTGCTCTTATTAGTTCTCTCTCATACTACCCATGT  
TGATGTTGCCCTAAGCAAGAACTTCGTAGAAATATACTAAAAATAAATTATAGCATTTATTATTATGCCCCGTTTACCATCGACGTTTT  
TGGACTGAAAGAATTTACATGAAAGAATTATAAGTTTTCTTACTGTGACGTAGTTGTGCCACACATGCTTTGAATCATATTA

AAAAAATCCTTAAC TACCATGGACACTTGTATGGATGGAAGGTGATTGAGCTTAATAAAAGGAAATGGATGTCAAAC TACA  
ATACATGCTTCTGGAGCTTCTCTCGATAGGCTAACTCCTTGTAACAAAAGTCTTCCAAGATTGGAGAATGTAAGCAATAATATG  
ATGACCTACTGTTTCATTTGCTAAATGTCAATCAAGAAAATATAGAATGACAATGCATCTCAAGATTTATGGGCAGTTAACTCA  
TCCTAACCAATGCCAAGATTCCACACTATATCCACCCTAGCTTCTTTTCTCGTGATTCATTATGTCGCTTATAACGAAAATGGA  
CAATTTCCCTCGTGGGCTCACATGCCCATCTTAAATCTCACACATCCAGTGGGCCGTAAATGAGCCGTGATCTCCTAGACTAGG  
TTGGCTTGATCCATAGCCTAGTGATAAGAGGTTGCTTTGTCTGATGTGATGGAGAGTACATGTTATCCGAGAGTCGTGGTGCA  
AGGGACTTCTTGATGTGGTACGGTTTGGGCTTCGAGTTTATGGCCGATGCTATTGGACCCGCGCCCTAGAAAAAATATGGG  
CTACTTTTCGTAAACATTTGAATATATGAAATTTCCGCGCAAGACAGTTATTCCACTTTTAACTCATACAACTAGCCACTCTTG  
CACAATGTGCAAAATAGTTTATAGCATCTACCAAAACGAATTGATAATCATATTTTCCAAAAATAAATGATTAGGCCACAACCA  
AAATGATTGCAATTCCTTCCACCTCGGTAAATTTCTCAAAC TACGATGGAATTTCCAAAAATGGGTGACCATGACCAAGCAACG  
AAAAGTAAACACCAACAAGTCACAGCAGGTGAAGTTGAACAGAAGAGGACGACGGTAGCAGCCGCCAGGAAGCCGGCG  
ACGCAGCAATGAAACAATTGAACACCACAAAACCGACCATCCCCGTGCACTCCGCGCCCTCCGATTTCCTGAAATCACTC  
CACGGTCTCTCGTTCCCAGGCCTATGAAAGTTCAGTTCAGCCCCGGGCGTGGGTCCCACCGCGTGTACCAGTACTAGTCTCC  
CAGTCGGCAGACTCGGGAGTCACTCGGTGCGCACTGACAGACAAAAGTCCCAACCACCGCTCCCGTCCCGCTTGGCGCTTT  
GAGGAGGTCCAGGTCCAGGTCCAGGTCCAGGTCCAGGTCCAGGTCCAGGTCCAGGTCCAGGTCCAGGTCCAGGTCCAGGTCCAGGT  
CCGTCCGCCACCACCGCGCTCCTCTTCGCTCTCCACGTCTCTCTCTCACCGCCGCTCCGTGCGCTCCTCGCCGTCTGTC  
CTCGCGGAGCAGGTGCGCAGCATGCTGGCGCTGCTCCCACTCAAGCGCGCCCTCACTCCGCGCGCCCTCACTCCGCGCGCCGCGC  
TCTCCGCCAGTGGTTCGCCGAGTCCGGCGCCCACTGCTCTGGCCGGGGTCACTGCGACGCGCGGTCCGGCCGCGT  
CGTGCCCTCGCGCTCGCGGGCGCCTCGGGCGGCGAGCTGTCCCGCGCGTCTGCTCGCTCACCGAGCTTAAAGCGCTCTC  
CTTCCCTCCGCGGGGCTTGGC

>SsLRR-RLK104

TAAC TCGATTATAAAAAATGTGCAACATTTATATCTCCAAATAAATTTATTTAAAAACTAGATCCAAAATTTCTTTCTAATGAT  
ACTAATTATGTACTATAAATATTAATATTTTATTACATGTTTGTAGTCAAAGTGTGTTATCAGGAAACGTAAAAATAGATATCA  
GGACAGAGGGAGTACGTCAGCGCTGAGTAGGACTTCCAAACGCAAGAACCCATGCGGAGTGTGCGAGCAGGCCAC  
CGATGCAATGCAAAAGAGGCGCACCCACGCAAGCAGTCATGATACGATTCCCCCGTCTGTGGACTGTGTGGGCATCTTCAA  
CTTCAAGGTGGCCTCTCTTCAGCTACCTCTCTTTCTTTTCCCTTGGAGACCTTGTGGTACAATTTCCATGAAAAGCACT  
CCTACTGCTGTGTAATACACAACAAGCTGCCTGCGTTTCAGATGCGACCTTGCCTCAGACCTGGTTTGGTAGAGGCCA  
CGCAGCGCTCAGACGACGCGTCCACCATCCACCACCGCTTTTTCGCTTTACGACGGTGGTCTTCGACGGGACGGGG  
ACATTCCAGGCCTGACGCCACTCGCGTCTGCGGCGCGCGCCCACTGGCCTTTTCTATCTCCGTGTGGCGGCATCACCG  
CGCTGAAACTTCATGGAAGTCCCTTGGATCGAGTGCAGGCGCGCGGGCGGGTGCACGCCACACACGTCCACACGCAATG  
CCCGCGGAGGGGTGCGCAGCAGCGCTGCCCTTCCCGAATGCCCGATACCCCTACGGGTACTACGGCGCCCGCTCTCTTC  
GCTTCGAAGTAAATTTTGACGCGAGACCGCCGAGCAAAAGGCGTCACGCCTCACGCGTCAGTAGTAGTCGCGTTGGAGTA  
TGGCGTCGTCAACATGGGCGGTGCGCTGACCTGACGGGCAATATCCATTACATGTACATGTACTGTACGCACTCCG  
ATTAATAATATTTCCACGATCTTGCAAACTTTTCTCCCTACATTTGATATATATATATATATATATATATATATATATATAT  
ATATATATATATATATATATATATATATATATATATATATATATATATATATATATATATATATATATATATATATAT  
AGTTGCTGCCTAAAGGCACAAAAATGTAAAAGAACACGAGTCTACCGGCAGCCCTTAATTAATTACACTCAAGCCTCGCG  
GTAAACCTGTAGGAGTACCTTTCTATGTTTCAGTGGACAAGTACGCTACAACCTCTCTTAAACCAACGTCATGTGCGAGGC  
GTTTCGTGCGGTGCGACGACAGTGTGAACCAAGTGGTGAACCAACCGCTGTTTTTCCAGTTGAAGATCCCCCTA  
ACCCCAACCGGGGAGGATTTAGCAAGTGGTGAATTTATACAATATGGTGACAAGTCCAGGCCTAATTCGGAAGCAAGGA  
GACAAATTCAAAGACCACTACCCAAGCAAAGCTACTAGTTGCCCTTTCTCTTTCTCATCTGCTCCCCGTGCACTCAGCAATT  
CAGCGTCATACAAGTACTTAGCAATTAATAAAGTTGAAC TCAAGCCACAGCCGATAAACCCAAGCTCCGTTGTCTGACGA  
ATTGAGCAGTGTGGTGTCCAGTAAACGCAAGGATTTAGGCCTTGCTTAGTTGGCCGAATCCGCGCGCCCGCAAAATCACTGTA  
GCGCATGTAGTATTTTCGATTATTTGGTAATAATTGTTCAACCATTACTAATTAGCTCAAAACATTTGTCTCGCAAAGTACAACC  
AAACTGTGCAATAGTTTGTGATTTATCTATATTTAGTACTTCATGCATATACCGCAAGTTGATGTGACGGAAGATCTTCTT  
TTGTATAGTGCCAAATTCAGGAGCTTAGGGACTAAACATGGCCTTAATCCATTCAAATGCCAGGCCCGGGCGCAACAACGAC  
AGCCGGTAG

>SsLRR-RLK66

GTCAGTCGGTCATATGCTGCGGTTTGACTAGAAATCGCACTATCTATTTATTTCTCCGTCCTTTATATATGTCGCGCTTGGTGT  
GTATACCACAAGTTTAACTCGATTTATAAAAAATGTGCAACATTTATATCTCCAAATAAATTTATTAATAAATAGATCCAAAAT  
CTTTCTAATGATATTAATTATGTACTATAAATATTAATATTTTATTACATATTTAGCCAAAGTTGTTTCTCAGGCGTAAAATATA  
GATATTACGACAGAGGGAGTATACGTGACGGCTGAGTAGGACTTCCAAAACGCAAGAACCCATGGCAGGTGTGCGAGCA  
GAGCCCAAGTGAATGCAATGCAAAAGAGGCGCACCCACGCAAGCACTCATGATACGATTCCCCCGTGTGTTGAGTGTG  
CATCTTCAACTTCAAGGTGGGCTCTCTTCAGTTACCTCTCTTTTCTTTTCCCTTGGAGACCTGTGGTACAATTTCCATGA  
AAAGCACTCTCTGCTGTGTGTAATACACAACAAGCTGCCTGCGTTTCAGATGCGACCTTGCCTCAGACTTGGTTTGGT  
AGAGGGCAGACACGCGGATCCACCATCCACCACCGCTTTTTCGCTTTACGACGGCGGTCTTCGACGGGACGGGGACAT  
TCCAGGCTGACGGCTCGCTGCTGCGCTGCGGGCGCGCCCACTTTTCTATCTCCGCTCTCGTGTGGTGGCCTCACTCT  
TCATGGAGTGCCCTTGGATCGAGTGCAGGGCGCGGGGCGGGTGCACGCCCCACACAGTCCACACGATGCCGGCGGAG  
GCGTGCAGCGACGCGCTGCCCTTCCGAATGCCCGATACCCCTACGGGTACTACGGCCCCGCTCCTCTTCGCTTCGAAGT  
AAATTTGGACGCGAGACCGCCGACGAAAGGCGTCACGCCTCACGCGTCAGTAGTAGTCGCGTTGGAGTAGTGGCGTCGTC  
AACATGGGCGGCTGCGCTGACCTGACGGGCAAAATCTCATGATGATGTACTGTACGCACTCCGATTAAAAAATAT  
TTCCACGATCTTGCAAACTTTTCTCCCTACATTTGATATATATATATAACACAGAAAATATGGTCAAAGTGTCTGCCTAAAG  
GCACACAAAATGTAAAGAACACGAGTTCTACCGGCAGCCCTTGATTAATTACACTCAAGCCTCGCGGTAACCTGTAGGA  
GTACCTTTCTATGTTTCAGTGGACAAGTTACGCTACAACCTTCTTTAAACCAACGTCACGTGTCGAGGCTCGTGCCCGTGCG  
ACAGCAGTGTGAACCAAGTGGTACTGGTGAACCAACCGCTGTTTTTCCAGTTGAAGATCCCCCTAACCCCAACCGGGGA  
GGATTTAGCAAGTGGTGAATTTATACAATATGGTGACAAGTCCAGGCCAATTCGGAAGCAAGGAGACAAATTCAAAGAC  
CACTACCAAGCAAGCTACTAGTTGCCCTTTCTCTTTCTCATCTGCTCCCGTGCAGTCAGCAATTACAGCGTCATACAAGT  
ACTTAGCAATTAATAAAGTTGAAC TCAAGCCACAACCGATAAACCCAAGCTCCGTTGTCTGACGAATTTAGCAGTGTGGT  
GTCCAGTAAACGAGGGATTTAGGCCTTGCTAGTTGGCCGAATCTGGCGTCGCCGAAATTAAGTGTAGCGCATTTAGTATTT  
CGATTATATTTGGTAATAATTGTCCAACCATTAAC TAAAGGCTCAAAACGTTTCGTCGCAAAGTACAACCAAACTGTGCA  
ATTAGTTTTGATTTTATCTATATTTAGTACTCATGCATTAACCGCAAGTTTGTATGTGACGGAAGATCTCTTTTGTATAGTGCC  
AAATTCAGGAGCTCGGGGACTAAATTCAGGAGCTCGGGGACTAAACATGGCCTTAATCCATTCAAATGCCAGGCCCGGG  
CGCAACAACGACAGCCGGTAG

>SsLRR-RLK84

TTCTCAGAAAACGTAAAAATACAGATATTCAGGACAGAGGGAGTATACGTGACGGCTGAGTAGGACTTCCAAAACGCAAGAA  
CCCATGGCGAGTGTGCGAGCAGAGCCACCGATGCAATGCAAAAGAGGCGCACCCACGCAAGCACTCATGATACGATTCCC  
CCCGTCTGTGGACTGTGTGGGCATCTTCAACTTCAAGGTGGGCTCTTTCAGTTACCTCTCTTTTCTTTTCCCGCTTGGAGACC  
TTGTGGTCAATTTCCATGAAAAGCACTCTCTGCTGTGCTGCTGCTGCTGCTGCTGCTGCTGCTGCTGCTGCTGCTGCTGCTGCT  
GCGCTCAGACTTGGTTTGGTAGAGGCCACGCACGCGCTCAGACACGCGGATCCACCATCCACCACCGCTTTTTCGCTTTAC  
GACGTTGGTCTTCGACGGGACGGGGGACATTCCAGGCCTGACGCCACTCGCGTCTGCCGGCGCGCGCCCACTGGCCTTT  
TCTATCTCCGTGTTGGCGGCATCACCGCGTCTGAAACTTCATGGAGTGCCCTTCGATCGAGTGCAGGCGCGGGGGCGGGT

CACGCCACCACAGTCCACACGCATGCCCGGCGGAGGCGTGCGCGACGCGCCTGCCCTTCCCGAATGCCCCGATACCCCTA  
CGGGCTACTAGGGCCCCCGCTCTCTTCGCTTTCGAAGTAATTTTGGACGCGAGACCGCCGACGAAAGGCGTCACGCCTC  
ACCGCTTGAGATGAGCGTTCGTCACATGGGCGGCTGCCGTTCGCTGACCTGACGGGCAAAATATCCATTACATGATGAC  
TGTACGCACTCCGATTAATAATATTTCCACGATCTTGCAAACTTTTCTCCCTACATTTTGATATATATATATAAGTTATAATATA  
TATAACACAGAAAAATTATGGTCAAAGTTGCTGCCTAAAGGCACACAAAATGTAAAAGAACACGAGTTCTACCGGCAGCCCT  
TAATTAATTACACTCAAGCCTCGCGTAACCCCTGTAGGAGTACCTTTCTATGTTCACTGGACAAGTTACGCTACAACTTCTCT  
TTAACCCAAACGTCAGTGTGAGGCGTTTCGTGCCCGTGCGACAGCCGTGTGAACCAAGTGGTGAACCAACCCGCTGT  
TTTTCCAGTTGAAGATCCCCCTAACCCCAACCCGGGAGGATTAGCAAGTGGTGAATTTCAATATGGTGACAAGTCC  
AGGTCTAATTCGGAAGCAAGGAGACAAATCAAAGACCACTACCCAAAGCAAGCTACTAGTTGCCCTTTCTCTTTCTCAT  
CTGCTCCCCGTGCAGTCAGCAATTCAGCGTCATACAAGTACTTAGCAATTAATAAAAGTTGAACCAAGCCACAACCCGATAA  
ACCCAAAGCTCCGTTGTCTGACGAATTGAGCAGTGTGGTGTCCAGTAAACGCAAGGATTAGGCCTAGCTTAGTTGGCCGAAT  
CCGCTGCCGCCGAAATCACTGTAGCGCATCGTAGTATTTTCGATTATATTGATAATAATTGTTCAACCATTAACTAATTAGGCTT  
AAAACGTTCTGCTCGCAAAGTACAACCAAACTATGCAATTAGTTTGTATTTATCTATATTTAGTACTTACCGCAAGCTTGAT  
GTGACGGAGAATCTTCTTTTATAGTGCCAAATTCAGGAGCTTGGGGGACTAAACATGGCCTTAATCCATTCAAATGCCAGG  
CCCCGGCGCAACACGACAGCCGGTAGCACTTAGCAGCGGTTGGCGTGTCTGCTCGCCACATGCGGGCCTCGGGCCATTAG  
ATAACTTGGGATAAGTGTCAAAGATTTGTCTCTTATTCTCTGCTTACTTCACCTCTCCCCGTGGAGAACCAGAGCAAGAGAG  
CGCAGCGCGTGTGGATGTGGAGGCTGCTCGCCGCTCGGCACGTGCTCCCCGTGCGCGGTGCTTCCGCTTCGCTCGGTGT  
CTTCCATGATTCGGAAGCAAGGCCAT

>SsLRR-RLK279

GTTTATGCGTGTCTTCTACTCAAATGCTTTTTTAGCAGCCTGTCTGGTGTAGAAAAGTGGAGAAGTGTCTGCTCGGTGTCTG  
CTGTACTGTACATGTTTTCTCAGAGAGAAGTGCATTTTATCATGGAATCAGCGGAGCTACGGGTTGCTAAATCCAAGGAC  
TGCTCGCATTGACCATTGAGCCATGAAAGTCAGGTGACATGAGAACCAGGAAGACAAGGACAGCACCTGTGTGGGCTGTGG  
ACTGTGGCAGCCAGGCATCTATTACTGTGCGCCTGCGTATCTGCTTGTGATTTCTTGTGCACTATTCTTTATTTGTTTTGTT  
TCGATTTTGGATGGAATGAGGATTAATAATCAACAGGGCGGTTGTTCTACTGATTGTTCTTGGGTGCAATTTGT  
CTGGCTAACTTTCAGTATGATTGTGCGGTAAATTTTCATTGGAAAGCTATCTCATCCGATGTTCCAGCAAAGCATGTCTTTT  
TTTTTTTACACCTTTACATCATAGGTTGTGCGGAGTAGCGTTCTTAGTATGGCAGGGAACAATGGTAACGAGTAACAATGAT  
CACCACCTCTGTAACGAGTTACAACGATCAAAGTATGGCAGGGAACAATGGTAACGAGTAACAATGATCACTCACTCTGTAA  
CGAGTTACAACGATCAATCACTCACTCTGTAACGAGTAACTGATCACTCACTCTGTAACGACTAAACAATGATCAATCACTC  
TGTAACACTCTGCTATCCAGCCAAAGGCCGTGGGAGTTGTGACTCCGTTGACATATCCCTCACCCACCTTCCGTTGGCAGA  
GCTATCCGCTTAGCTTTTCAAGTCATATTTCTTAATAAAAAATAATTTTCTCTTACAATAAATTAGTAAACGATATATTAGT  
CTGCCATCTCAGGAAAGCGAACCTCGTTCTCGTCCGGGGATGAACGTACAGTCCGCTCTTTTTTTTCGCGATCGTGCA  
GAGCACGTTTTTCATTAAAGAGAAGAGAGTTTGTACAACTAACCGCCTTGGTAACCCGAGTTACCTCGGCAAAACCAA  
CAGCACCTAGAACACGTAGAACAACAAGTCGGTATTACAGGACCGAAACTCGCGACAACGGGTGGGACAAACAGGCAGAA  
GACAACAAAGTCCGCAAGTCTGACTACACCCCGCAAGGCTCCAGTTCTCGATCTCGTCTGGATCAGCGATTCCAATCGCGC  
GGCGTAGTCGCGACACCATTTGAAGGTTCTAGCGTTCCGCTCCTTCCAGATCAACCAACCAATGAGGAAGAAGGGAATCA  
AAACCTCTACGCATCGTCTTCGGGATCTCTTCTGAACTGAATCCACCAAGATATCGCCGGCCCCGGCTGAACGGTGATCAT  
ATCACCTAGATGCAAGTTTCATCAGGCAGCGGCTCCACACCTCAGAGCGAAGGGGCAATCAAGTAGGATATGATCAAAAGTT  
TCGGCGCTTTGGTGACATGATGCAAGTATTAGAGTCTTGACGCCATGGCGATACCGTCTGTCCCGGTCCAGCATCTCCC  
GTGCACAGCCAGCCACCAAAAGAACTTAACCCGAGGAGGTGCGGAAGTCTTCCAAACCTGCGGTGCACCGAACGGTTGCG  
AAGACCAAGGAACATGGCCCTATATGCTGACGCCGCGAATAGTTCTGATCGGCCGTCAACCTCCAGGCAAAAGGTATCCGG  
CTGCTGTGACAGCTGCACCTCTCCAAGATGTCACACAGGCAATCGTATTCATCAGCAGGACAAAGGGCGCACTCCAAC  
AAGTCCAAAAGTGACAGTGCAAAAAGTCCAAACGAAATAATGCAAAAAGGCGAGAGCTCGCCGGCAAAAATGTACTGCCATCC  
TGCAGGCGATGAAATGTTTACTCCACCCTAGTACTACTCCCAACCACCTGAGTCTACTCGTGAATGACCAGACGTGCTG  
ATCTTGTGACGAGGATTAGACGAGCCGA

>SsLRR-RLK201

GCCACTCGTAATCTTGATGTTTTGATAGGATAAAAAAATCCTCCGGCGGCAACTTCCATCTTAACTCCGAATCTGTCAATAG  
AGGCATCCCCTCGCAATCTGAGAAATAGAGCAAGCAATAGAGGTTCCCTTTTGTGAGTTCTAATTGTGAGTTAGGGTGCCG  
GAGATGATAATCATGGTCGCTCGCCACCATCTGGGAGCTTCATCAGAATTAGATCTTCATCCACTACTTTATATCTAAGAATAA  
TAAGAAAGAGAACCGACAAGGGAGATTCAGTTTTGTAGCACATGAAAAAAACGACTCCAGTCTCTTAAAAAATGAACCTGAG  
AAACGAAGGACCCGGAGAAGCTAGGGTTTAGGTGCTCCAGCCGGCTCCGCCACATGTCTGCTACAGTGAACACTACGGTGCA  
GGAGTCTAGAGCCGCTCGGAGCCCTTCAACCGGGCCCTAACTCTCACAACCAACGTGCGAACGCTCCAATGTAAACCGCTA  
ATGTAGGAAGCGGGCGCTCCGCCAGACGCTCCATTTGGTGGACCATGACGCCAGCCTAACAACTGTCTCTTTTCATT  
TCTCAAAAAAAGAAAAAATTTTGTCTCATCAATCATTTCCATCCACTCGTTCTCTATTGCTCTCTATCTGCTCGCTGCCACC  
TCCAAGCCATGCCCGTGTGCGGCGATGAGGCCGAGCCCGCAAGGCTCCTGCGATGTCGTCAAAGTCTAAGGCCAGCATATT  
CTCCCGCATCAGCTTCTCGGAGACGGCGCAACCTCTCCGAGCGCAAGCGTAGTCTGAGGGCTCCGACAAGCCCCCGCG  
ACACTCTCTTCTCTCTTCAAGCGTTGTGGCAGAGAGTGGCGAGAACCAGCGGCAACCGCAACCAACCAAAACCC  
ACCGTGAGGGCCACACCGATAGAGAAGCGTAGGCCCTACTACCATCGTACTGCGCACTACTATGGCTGCGCGGACGAAGAGG  
AGAGCGAGGAAGAGGAGCAGCACTCGTCTCCCGGCACGAGCGTGAGCAGGGCGGCGCGACCGCTGCTCTGCTAGGCTC  
GGGCTCATGGCCGCTTCGAGGCGGCTGCTGGCTTACTAGCATGTTGCAAGCGCCTGTTCAAGTGTTCAAATATTTTCATT  
TGTATGTTGCAAGTGTTCATACGGATGTTGCAAAAGTAGATCAGGATGTTGCACATGTTGCAATAGATGTACAGCTATGTT  
GCAAGCACCTATTCTCAATGTTTCATTGTTTTTCCGGCGATGTTGTAAGTGTGTTTATCTGGATGTTGCATATGTTTCACA  
CATATGATGCAAGTGTTCATCTGGATGTTGCATATGTTTACAATAACTTCAAGTGTTCCTCAGGTGTTTTACAAGTGTTC  
AGATGTATGTTTCAAATGTTTCATTGTTTTTCAGACGTATGTGAAATTGCTGCATCTGGATGTTTGAAAACTAGATCGGATGA  
TGCATCTCCCTCCCTTCTTTCTGCTGTCTACCTCGGTGTGACGCGCGGGAAGCGAGCGCAGGCGGAGGCGGTCCCCACT  
GGCGCGGGCAGACCTACGTGCTTGACGGCGGGTGACAGCGCGAGACATGGGTGGGCAGACAGTGCACCGGATGACG  
TGCAGCAGCGCGGACGTCCGGATGTCCAGGGTGGGTTTTTTCATCCCATGGTGTCTTAAATGGGGCGCTCCATGCGCGTGCT  
GCGTGACGCACTTAACTACGGCCCATCACAGAGGACAAACTATACAAAGCATCTTCCGCGCTTCCGAATTTGACAAGG  
AACAATTTGTTCCCTGTGCTCGTGGCCGTTGGCCGACGTTGCGGAGTGCGGATTGTCCCTTCTCTTCTGACTTCGACTAT  
TCCACCCCAATCAGATCAGGACGCTGCCGCGGTCCGCAAGTGTCTCTACAAAACCAAGAGAAAAACAGCGCCGGGC  
ATACGCGCAAAAGCGGAGACTACCTGGAGCTAT

>SsLRR-RLK247

CGAGATAAGGCTGCGGAAGTGTAGCGGAACGGAACCGCTCAAAGATACCATGAAAGTGGAGAATAAATCAATCGTATTTCC  
ACTAATGTCATGATACATATGGCCGAGGGTGGCTCACAAGCCAAACCGCACAGGCGTGTACAAGCCACTAATTAAGGCA  
GCCTATAAATACACTTACTAAAAGGCTAACACAGAGATGACAAATCATAGTCGCTCGCCACCATCTGGGAGCTTACGATCAG  
AATTAGATCTTCGTCCACTACTTTATATCTAAGAATAATAAGAGAGAGAACCGACAAGGGAGATTAGTTTGTAGCACATGA  
AAAAAACGACTCCAGCTCTTAAAAATGAACCTAAGAAACGAAGGACCCGGAGAAGCTAGGGTTTAGGTGCTCCAGCCGGC  
TCCGCCACATTGCTGTACAGTGTAGTACGGGTGCAAGGAGTACGCGGTCGGAGCCCTCCAATCTCGGCCCTCACTCTCA  
CAACCAACGTGCGAACGCTCCAATGTTAACCGCTAATGCTGGGAAGCGGGCGCCCGTCCGCCAGACGCTCCATTGGTGG  
CCACGACGCCGAGCCTAACAACTCTGCTCTTTCATTCTCAAAAAAAGAAAAAATTTGCTCATCCAATCAATCCCATCC  
ACTCGTTCTATTGCTCTATCTGCTCGCTGCCACCTCCGAGCCATGCCGTGTGCGGCGATGAGGCCGAGCCCGCAAGG

CTCCTGCGATGTCGTCAAAGTCTAAGGCTAGCGTATTCTCCCGCATCAGCTTCTCCTCGGAGACGGCGCCAACTCTCCGATGC  
CAAGCGTAGTCGTAGGGCCCTCCGACAAGCCCCCGCACATCATCTTCTCCTCCATGAAAAGCGTTGTGGCAAAGGGTGG  
CGACGGCCGCGGCAACCGCCACCCTGCAAAAACCCCTGAGGCCCACGCCGATAGAGGAGAAGCGTAGGCCCTACTACCG  
TCGTACTCGGGCGACTACTATGGCGGCGCGGACGAAGAGGAGAGCGAGGAAGAGGAGCAGCACTCGTCTCGCGGCACGAG  
CGTAGCAGGGGCGACGCGACCGCTGCTCCTGCTAGGCTCAGGCTCGCGGCCGCCCTCGAGGCGGCTGCTGGCCCTTGCTAGC  
ATGTTGCAAGCGCCTGTTCAAGTGTTCAAATATTTTCAGATGTATGTTGCAAGTGTTCATACGGATGTTGCAAAAGTAGA  
TCAGGATGTTGCACATGTTGCAATAGATGTACACGTATGTTGCAAGCACATATTTCAATGTTTCATTTGTTTTTCCGGCGTA  
TGTTGCAAGTGTGTTTATCTGGATGTTGCATATGTTTTACACATATGATGCAAGTGTGTTTATCTGGATGTTGCATATGTTTA  
CAATAACTTCAAGTGTTCAGGTGTTTTACAAGTGTTCAGATGCATATTTCAAATGTTTCATTTGTTTTCAAACGTATGTT  
GCAATTGCTGCATCTGAATGTTTGAAGTATGATTATGTTGTCATCTCCCTCCCTTGAAGCGAGCGCAGGCGGAGGCGGT  
CTCCACTGGCGTGCGGACGCCCTACGTGCTTGCAAGGCGGTGTCAGCAGGCGAGACATGGGTGGGTAGACACGAGACACGG  
GACGACGTGCAGACGCGCGGACGTCCGGATGTCCGGGGTGGGTTTTTATCCCATGGTGCTCTTAATTGGGCGCTCCATGCG  
CGTGCTGCGTGCAGCACTTAACACGGCCCATCACAGAGGACAACTACTACAAAGCATCTTCCGCGCCTTCCGAATTCTGA  
CAAGGAACAATTTGTTCCCTGTGCTCGTGGCCGTTGGCCGACGTTGCGGAGTGCGGATTTGCCCTTTCCCTCTTCGACTTC  
GACTATTCCACCCCAATCAGATCAGGACGCTGCCGCGGTCCGCAGGTGCTCTCTACAAAACCACAAGAGAAAAACAGGCC  
GGGCATCAGCGCAAAAGCGAGACTACCTGGAGCT

>SsLRR-RLK402

CATAGTCAAATCCAACCGTTACTTGCCAACTCAGCAAAAAACGAGGTGACCGGACGCGCCGGTCAAAGTGACCGGACGCG  
CCGGTGCCTCGTAACGGTCGAAAACCTGAAATAACGGCTGAGTGACCGGACGCGCCGATCAGGGGTGATCGGACGCGTCC  
GATCGTGCAGGGAGCTTACTATACTCTAACCTGACACGCGACCGCGTCCGATCAGTGATGACCGGACGCGTCCGGTGCAG  
AGTACCTTACTGGAACATGACCGGACGCGCGATCACACCCAAGTCGCGTCTGATTAGGTGATTTCCCTCAAGTCACATCGTG  
TCAGCTGAACACCGCGTCCGGTCAACAGCGCTGAGACACAGTAGCGGTTAGAACTGACCGGACGCGTCCGGTCAAGCC  
AGACACCGCGTCCGGTCAAGGGAACCGTCTCTAAACACTCCGAACTCGACGCAACTTGAACCAAGTTGCTTCCAACCTG  
AACTTTGAGCAATTGCGAAGCTACCTAGTGCTAAGTTTGAACAGTTGCAACCAACCTAAACACAAAGTCTAGGTTCGTTGAGGA  
GCTACTCGCTCATGCCCCCTTTATAGTACGGCCAAAGGAAAAGCGAAGATCCTAACGACTATTCCGAATGTAACCAACAC  
CTTGACATCCGGAACCTAACCGTCTTAATCTTGACGTCAATCCTTTGAAAACCGAAACGATTTCCATCAAGGGGTATGAATAC  
CATAGTGCCCAAGCAGTTATCAACCCCATGACCTAACTACCAAAGTTTCTGCAAAACACACGTTAGTCATGGTAATAAAG  
CGTTGTGACCAATTGCGAAGCAACTCTCGGGGCTAGATGCTTTTCATCGATAATACACAAATTTAGTGTTCGTTGAGGA  
TGAATAGGATGATCTTTAGCTTTCTAACTCATGAATACTGAGTTTGGTTTGAGACTAGAATGTGTTGATCAAACGGTACATCAT  
ATGCAAAACCTCATATGCACATGCTTATATTAATACATAAACACGAAGGATGTAGTCATCCCAACAAAAATAATAAATCAACT  
ATCATATACTACTTCATTACGATGAACGTATTCTCAAACAAGCACTATAAACCTGAGGAATTGTTTATATGGCATCTTAGTCC  
TCTCTAGTGCCGGTGTCCACCACCTCTACACTGACCCCATGCTGCTTCTCCGAGCAGACATGAGGACGTCAACACCCCTT  
AGGACTAATTGGAAGCAAGGGGGAGGCACACCTAAGGATGAAAAACCCCTCCATGAAGAATAAATAATTAATCAAATTAAT  
TTTCCATGAATTTCCACCCTAGAAAAAGTCAGGATTCCAAGGAGATTGAGTTTCCATAGTAGCCCTTAGGGTCACATCTAC  
ATCTCCAGCTAATTAAGTGATTGAGTGATAATTTAGTTGATTAGGTGTTACCGGTTAGGTTAATCTTGATCTTAGTTAAGCAT  
AAGTTAATGGTGTATTGTTATATGAGATTTTCTTTTCGATTGCACATATTGGTTGAAGTATTATTTACAATGCATCTGTC  
ATGGTATGCAACACAAGCCAACATATGGAAGTTGAGTGATTTGGTCCAATAACAGGGCCCTTGATAGATTGCAAGTTTCAATTG  
GGAATTCAGTTTGAATTAGGGGAGGTTTGGTTACATCTAGTGATGATTTTTTTTCTTGAGCATGATACACATCAATCAATC  
TATCCTCGATATTCATTATAGCCGATTTTATAGATGTTTATAGTGAAGCTAGTAAACCGAAAAAGAGGGAACCCCTGGACAAG  
TAGGAACACCAGAACCATCTATATACGCTGACTGACCCCTAGAATGGGAAACCAGCAACTCCTCAGTTTACTTTCCCTAGTG  
TCACCAGCTTCGCTGTATTAACCATCTCATCCCATCCTTCTCTCTAGTGATGCTGCACTATTCCAATCTGTTCCGTCCGT  
ACTCCCCAGCTTCCCC

>SsLRR-RLK425

AACTATGGCTTATTTGGGCATACATTCGTTTTCAATAATAGTGGTGCAAAAGGATATGTGTGAGGATATTAAGGAATAACTAATT  
CTAAATTTCTTTTTTTTATAGATAATGAAAATATCCGGCTTCAGCCTTCTTCTGAGAAGAAGAAGCATCAGTCCAAAGTTATTA  
CAGTAGCACTAAAGTTTAAAGACGGTAAATAAAGGACCATCCATGCGATGCGAAGAACTCCATGGCTCTCGATTCTAGTA  
GCTTGCAAGCGTTAAGAACTCTGTTCCTTGTCGTCATCCGAGCGCTGCAACAGAGCCCAAAATCGTAGCCAGTGTTGCCCT  
GAAAAGAACCTGATAATGGTGTGAAGACATTAAGATTGGAAGTAGCAGTTTTACCTATTTTGAGACTAGAGCATAGATGTG  
GTGCACACTTATAAAAACTAGACGCGCTTGATTGAGGTCTTAATAAGATGCAAAAGAAATGAAGCTAGATACAAAAGATGTTGA  
ATTGGAATATCCCTGAAGTTTGTATCACCAATCCTTAGGTGATAACACTAGATGCTTTCACATGATCATTGCCACGCCAC  
TTGAAGCTTTTAATGTTTCTAGAAATCTAGCTCCAAGTATTTCTTGAGCTAGAGACAGATAGCACCAAAATTCCTAAAGGTT  
AAGCTAGTCCAAGGACCCCTTACAAGGAGGTAAAGAACAAATGGAGAGAAGACTAGGAAATCAAGCCAGTCAATGAAT  
AGGTGATGGCTCAGGGGAGGCTTGCAAAATACAAAGAATCCCTGAAAGTTTCTATTGCAAAACCAATAGGTCTTTTAAT  
GTTGGCACGTTGTTAGAGGCCGACTTGAAAATACACAAATTTAGTGTTTCGTTTGAGGATGAATAGGATAATCTTTAGCTTT  
CTAACTCACGAATACTGAGTTTGGTTTGAGACTGGAATGTGTTGATCAAACGGTACATCATATGCAAAACCTCATATGCACATG  
CTTATATTAATTAATAAACAACGAAGGATGTAGTCAATCCCAAAAAATAATAAACTCAACTATCATATCACTTCACTATT  
ATGATGAAGTATTTCTCAAACAAGCACTATAAACCCGAGGAATAGTTTATATGGCATCTTAGTCTCTCTAGTGCCGGTGT  
CCACCACCACCTCTACACTGACCCCGTGCTTCTCCGAGCAGACATGAGGACGTGAGCATCCCTTAGGGCTAATTTGGA  
AGCAAGAGGAGACACCTAGGGATGGAACCCCTCATGAAGAACTAAATAATTATCAAATTAATTTCCATGAATTTCC  
ACCTTGGAAAAAGTCAGGATTCCAAGGAGATTGAGTTTCCATAGTAGCCCTTAGGGTCACATCTACATCTCCAGCTAATTA  
GTGATTGAGTGATACTTTAGTTGATTAGGTGTTACCGGTTAGGTTAATCTTGATCTTAGTTAAGCATAAGTTAATGGTGTAT  
TGCTATATGAGATTTTTCTTTTACATTGCACATATTGGTTGAAGTATTATTTACAATACATTCTGCATGGTATGTAACACAA  
GCCAACATATGGAAGTTGAGTGATTTTGGTCCAATAACAGGGCCCTTGATGATTGCAAGTTCAITGGGGAATTCAGGTTTGAA  
ATTAGGGGAGGTTTTGGTTACATCTAGTGATGATTTTTTTTTTCTTGAGCATGATACACCTATCAATCTATCCAAGATATTCTATT  
ATAGCCGATTTTAGATGTTTGATTAGTGAAGCTAGTAAACCGAAAAAGACGGAACCCCTGGACAAGTAGGAACACCAGAAC  
ATCTATATACGTGACTGACTACTCCCTAGAATGGGAAACCAGCAACTCCTCAGTTTACTTTCCCTAGTGTCACCAGCTTCG  
CTTGATTAACCATCTCATCCCATCCTTCTCTCTAGTGATGCTGCACTATTCCAATCTGTTCCGCTGACTCCCCAGCT  
TCCCC

>SsLRR-RLK413

GTTATCACCACATAGGTGATAACACTAGATGCTTTCACATGATCACTTGCCACGCCACTTGAAGCTTTTAATGTTCTTAGAAT  
TCTAGTCCAAAGTATTTTCTAGAGCTAGAGACAGATAGCACCAAAAAATTCCTAAAGGTTAAGCTATGTCAAAAGGACCCCTTA  
CAAAGGAGGTAAAGACAAATGGAGAGAAGACTAGGAAAATCAAGCCAGTCAATGAATAGGTGGATGGCTCAGGGGAGAGC  
TCACAAATCCACAAGAATCCCTGAAGTTTCTATTGCAAAACTTAATTTGTTGGCACGTTGGTAGAGGCCGAACCTCGATAATA  
CACAAATTTAGTGTTTTCGTTTGGAGGATGAATAGGATAATCTTAGCTTTCTAACTCATGAATACTGAGTTTGGTTGAGACTGG  
AATGTGTTGATCAAACGGTACATCATATGCAAAACCTCATATGCACATGCTTATATTTATACATAAACACGAAGGATGTAGTCAT  
CCCCAACAAATAATAAAATCAACTTATCATATAGTACTTCAATTCAGATGAAGTATTCTCAAACAAGCACTATAAACCTGA  
GGAATGTTTATAGTGGCATCTTAGTCTCTCTAGTGCCGGTGCCACCACCACCTCTACACTGACCCGACTGCTGTTCTCCG  
AGCAGACATGAGGACGTGACACCCCTTAGGGCTAATTTGGAAGCAAGGGGGAGGCACACCTAGGGATGGAACCCCTCC  
ATGAAGAACTAAATAATTATTCAAATTAATTTTCCATGGATTTCACCACCTGGAAAAAGTTAGGATCCGAAGGAGATTGAGT  
TTCCATAATAGCCCTTAGGGTCACATCTACATCTCCAGCTAATTAAGTGATTGAGTGATAATTTAGTTGATTAGGTGTTACGG



GTTAGGTTAATCTTGATCTTAGTTAAGCATAAGTTTAAATGGTGTTATTGTTATATGAGATTTTTCCTTTCGCATTGCACATATTGG  
TTGAACGTGATTATTTACAATACATTTTGCATGGTATGCAACACAAGCCAACATATGGAAGTTGAGTGTATTGGTCCAATAAC  
AGGGCCTTGGATATTGCAAGTTTCATTGGGGAATTCAGTTTTTGAAATTAGGGGAGGTTTTGGTTACATCTAGTGTATTATTT  
TTTTCTTTGAGCATGATACACCTATCAATCTATCCAAGATTTCTATTATAGCCGTATTTTAGATGTTTGATTAGTGAGGCTATCT  
GCACTCATGGACCTCTATATTTATCCTCTATACGTCCTAGTCAGCAAGATTCTCTCCTCTATACTCAATTTCTCCGCATCCATCC  
ATCCTCTATATCATCCTCTATCCACTGTGGGACCCACTTGTCAATTTATCTAAATATATCCATGTGCGATCTAGTTTTGAAGGATT  
TATTGAGACGAATTTAATGGTGCAATCGAAATTTAATTTGGATTTTTGGTTTTGTGAGTTATAACATTTTTTATACGAAAAAAA  
TTGACACGCTTTTCTATGACCGCTGTTTGTCTACTGCCCTCACGCGCGCGCTCCGTCCGGTGTGCTCCCGTACTTTAGCGG  
ATGAACAGTAAACGCTATATATAGAGGACCGCGTTGCTTCTGGGAGATAGAGTAGTATTTACAGGGTACCGGTGCGGTGG  
TTTTTACTCTATCCGATCCTGCAGGAGACGTAGCGTACGTGAGTGCAGTCCGGTCTGAAGCTAGTAAACCGAAAAAGAGGA  
ACCTTGGACAAGTAGGAACACCAGAACCATCTATACGCTGACTGACCCCTAGAATGGGAAACCAGCAACTTTCCCTAGTGT  
CACCAGCTTCGCTTGTATTAAACCATCTCATCCATCCTTCTCTCTAGTGTAGCTGCACTATTCCAATCTGTTCCGTCCGTA  
CTCCCCAGCTTCCCCTTCAATGCCACCCAGCTCGAATCTCTCTCTGACGTGCAGCTCTCCACACGTGCGCTTCTCCGA  
>SsLRR-RLK266

ATCTAGAGAAACCAGAAAAATATGTTTCGTTGATAATCGGTATCATTTTTTCTCAACAAACGTTTGCTTAAGGAACCAAATA  
CATGCCATAATGTCCGAAAAATAGAGAAATTTTTCTATATGACATAGGAAAACTCGTGTTTTCTATTGAAATCCAACTCGA  
AATTCGCTCGTTTTCTTCTATTGACATTTTGTCAAGTTTATAGAGCTCTAACGATGTAAAGCTATAGACA  
AAAAGACTGTTTTGCCCTATTATTTATTTCCAGTCACGGTATTACTTTTTGCTGGCTATTGATGTTTTTGTGCAATTTTATGT  
TTTCTCAAATAAAAAAGCTCAAAACTAAAAAGTTGTTGAACTCATCGAGACATATAACTTTAATATAAAAAAGCTATCTTTATC  
CGACACCATAACAAGAAATATACGGTTCCTAAGAACAACAGCCCGGGTATGCGATAGATATGTTGCTAAAAAATTGTATTATTT  
TTGAGCATCTTAATGGCCTCAAATAAAAAAATTTAAATTAAGAAATCGAGAGCTGACATTTTACTTAAAAAGTATCTTAACA  
CGACGCTATACAAAAAGATATAATTTTTATAAGGCAACAAGCCCTGGTACGTGATTAATATGCTACTCAAACCTTTATATTATTC  
GTTTGAGCATCTTAACGATCTCAAATAAAAAAACAATAAGAAATTTGTAGATCTCATCGAGAGCTAAAGTTTTGTATAAA  
ATCATCTTCGTCGCCAGATATGAAAAAGATAATTTTCCGAAGCAGAGCATTTTAGTCTATATGCAACAGGCATTTTGTGCT  
ATTGGCCTACAGGGAGATTTAACACTAACATTGTTGACAAACGGAGTTGACGGAAGTGTCAAATAGGACAAAAAATTAAG  
AAGTGATGTATAGGAAAGCTTTGAAGTTTAGGTGTTAAATAGGAAAGTAGAAAAATTTCTAGTATTAAATAGAAATTTCTCCC  
TAAAAAATGAGTTGGATTCCCTTTTTTAAAGGAAAGTTGGATTCCCATTTAGGCTGTGTTTAGTTTCCATGAAATGTAATA  
GCCAACCCCTTGAATGCAATAAATGCAAAATGCCAAATTTTAAAGGGTGTGTTAGTTAAATGCAAAATTTTCT  
ATGAGGTGGGTGATGACTTTTTGACTTTTTAGCTTTTTTACCTCTTGAGACCAAAGTCTAAAGTGGAGAATAAATACCTTT  
TATCAAAATTTTATATGATATTAGTTTCATTCTATAAATAACAAGCTAAACCCAAAACTTTGTTGGTGAACGAGGAACT  
AAAACCTTGTTCACCTCACTCGGGCGACCTAGCCACCGTGGCTGGCAGCCTGCACGCCCCAGACGATGTCCGGCC  
TGTTTACTTCCCATGCAAACCTAAAAATTTTCTCTTCTACTCATCATTAATCTTTAAACGCATGCATGAAGCATTAATGT  
AGGTAAAAAATAAATAATGCTATAGTAACTTTTACCCAATATTTTCTCACTAAACACACCCCGGTCTACCCAG  
CCCAATCAGGTAACCATTCGGTTTCCATCGCGCGCTCCCGTCCCGCTGCGCGCTGCTCCGCCATCTCCGGCAGCCCACT  
GCGCAGTCCACGCACGACCCGTCCCACCCAGACCAACCCCACTAGTAGAGCCAGCGCGCAGCGCACACGCCGACCCAG  
TATACTACTACTGCTCCGTCCCTCGCTGCCCTGCCTGCCCTGCCCTCCCATCCACTCCACCACCACCCCGGCGCG  
CAACAAGCACGAGTCTCCACCTGGTCAAACCGTGCCCTTCCCCACCACCACCGCGCCCCAATCCGCGTGCCTCCGTCC  
GCCA

>SsLRR-RLK292

GAGAGTCCCTAGAAACGAACTTCAATGCTAGCAGAGCACAAGCCGCTCATCAAAAAAAAAAGAAAAAAGAAAAAAG  
AGCACAAGCCGCACTCGCGCGTAGTGCCACCGTGAGAAGTGTGGGAGACGGGGACCTTGGGTCTGCTCTGGCCTCTGG  
CTCTGCAGACACCGCCAGATATGAACAGAGCGCTTTTGTGCAAGGACAGGCCGTGTGCACGTATTGGAGACTACTCCCTGTG  
CCGAATACTGATATGTAATAAACACCTGTTCCGCTTAGGGCTGTAAAGTCCCGAAAAATTTTGGGAAATGCTACTGTAGCA  
AATTTGTGTATTGTGAACAATATATCCAATCATGAACCTAGGCTTAAAGATTCAATCTCGTGGAATTCGTCTAAACTGTG  
TAATTAGTTTTATTTTTTATCTATATTAAATGCTTCATGTGTCTAAAGATTGATGTGATGGGGAATCTGAAAAATTTTGCAAA  
ATTTTTTGCAAACTAAACCAGCCCTTATCAGCACAGCTTATCAGCCGTGGTACAATATTTTCTTTCATAACAAAAACAGCCAC  
AGCCGGCTTATAAGCCGAGAAACAGTCTACCGAACAGGGTGAAATATTTTGTGTGATTTTGCTAGAACAACTTCAGGGTG  
GATTTAGTTAGGTGAAAGCTTTTGAAAAAATAACCACTCAGGATGTTCCATGCGATGTGCGAAAGAGTTTCCGGATAC  
ATAAAAAAATAATTACATAGCTGGCTTGAAAACACGAGACAAATTTATTAAGCCTAATTAATCCGTTATTAGCACATTTGTA  
CTGTAGCACTTTAGTGTCAAATCATGGATTAATTAGGCTCAAAACGTTTCGCTCGCGATTTCTAACCAAATGTGCAATTAGT  
TTTTCGTTTACATTTAATGCTCCATGCATGTGCGCAAGATTGTTACTGTAGTTTTTTTTGTGAAAAATTTTGGATCTATAC  
ACACCCCTAATTAGAGAAATGAGCATATGTTGATGTAAAGCACCAGCATATCGATTGTTAGAGCATCTCCAAGAGTTTGCCAAA  
TCAATTTGGCATCTATCTATTTTGGTAAACAGGAAAAATTGTGCTCCAACAATTGACATCCAACCTTGGTAAATTTAGCA  
ACTTGGTAAATCTCCCCCTCCACGCGCATATTTGCGCGCTGAGCGCGAGCGCGCATCCGGCTTTTTGTGTGGGGCTCTTCGT  
TTCTTACGGGACCTCTTCGTTTCGCTIAGCGGGGCTCTTCGTTTCTTAGCGGGGCTCTTCGTTTCGTTTCGTTTCGTTTC  
TTTACCAAGTCCAAATGGCAAACCTTTGGAGATAGTCTATTTTTTCACTTACCATATATTTTAGCAAGTTGTCAAATCATGATAT  
TTGCCAAGTGAATTTTAGTAACTCTCGGAGATGCTCTTACTTGATTACCTAGCATTTCTAGTTGGAGAATGGCATTTCCT  
AAATGTTTCCATAATCAATCGTTCCATAACTTCATAAGGGCTACGACATTCCACATGACACAACCTTTGTATTCCTCAATAGCA  
ATTGTAAGACGTTTTGTCTTTTCTAGATACACATAGTATTGTTATACACTTAGATATATATTATGCTAAATTCATAATAAAAA  
AATGTATCTAAAAAAGTAAAAATATCTTACAATTGGAACGGGAAGACTACTAAGTAATTTATTAGTAAACTGTTTCAATATT  
TCAAGAAGTTCCTAATGCCACCAGGGACCAATGTTTTCTTGAAGATAAAATTTAATTAAGAAATAAATCTCGAAGGTGAA  
AGGATCAAGGGTGTGCGGTGATTAGTCTGCTATTGGACCCCAATTTCTGATCCTAGCTAGGAAACGAGGAAGTCACTGATAT  
ACCAAATTAGCAAATGAAGTAGACATACGAGTATCCTTGGTTTTTATATTATATGAAAAAAGTTTTATTGATGGGTATACTTG  
GCC

>SsLRR-RLK385

TTTGGCTTTGATTTTTGAGAGTTTTTTTTTAAATAGCAGGAGGCTCTAACTGTAGTAAGGATTGGTTATAGGCAAACTCTTGC  
TGAGATCAGATAGACTTCCTTTTCCAAAAAAGATTGTTGTGTGTTCTTGAGGAACACAGTAAGGACTACTTTGGA  
TGTTATAGTTTTGGAACCTCGAGACGAGCAAAATGATGGTTTCCGGAATAATAGTTGAAGGTGGAGTTTCTAAAACTCAAAA  
ATAATACCCCTGAGCTTTTTTACAAAGTCATGGTTTTCAAAAATTTTGAATAATTTTGCATCCAAACATAATCAAGTGAT  
GCTTATATGCACTAGGCTCTGTTTAGTTCGCGCTCGGCGGCACGTTTTAGCCGAAAAACAGAAAAAATCCCGCCGAAGGGTC  
TACGGTGGACCGCGTGGGACGACCACGACGGCATGAAACGCTGCGCGCTCGAGCCGTGTTGCTTATTGTGGTGCATG  
ACCGGCTGTGCGGAACCAAACAGGCCGTAGTGGAGTCAATTAGAGCGTCTAGATATGGATACTTGGTTTTCTTATTTGAGA  
TAAGATCACCATTTATTGATATTATAGATAACAATTTATAGGAGGTGAATATTACTTACGACGCTCTATCCCAATCCACACT  
GCCATCCTGGTCCGTCCGATCATCCAGAGGAGAGAGAAAAAGAAAGCGAAGGGTGGTGCAGTGCCTGAGCAGGCGGCCGG  
GTAGACTGTTAGAGTTGACCGGAAAGTCTGGGTTTCCGCGTGCCGCGCTCACCTCACTCAGCACACCACCGGCTCTCGCG  
GGCCCAATGGGCCCCACGCTTTGAAAACTCCCTCTCGTTTTCTAATTCACACTGGACCTGCCTGCCTGCTCTCTCA  
GCTCGCTCGCTCAAGTTCTCCCTCCGACTCCGAGACTCCGAGTCTCTCCCTCCCTGAACCTGCAGCTTCGTCGCTCTCTCA  
CCCCGCCGGCGCTCCCTCCCTGGTCCGCCGCGCTACAGGTTCCCTCCAGGCGCGGGGAAGCAGCTCCCGGTGAGCACCCA  
TGGAACCGCTCCCTCCACGCTCCCGTCTCTCATCTTTTTGTTTGGACTACCTATTCTTGTGGTTAATTATTATATCGTTCT

TGCAAAATCTGCCATGGTCCGGTACGATCTTGCATGCTCTGGTCTGGGCGAGGGTCTTAAATTCGAGAGGACCTGTGCAGCC  
GTGGCAAGGAAAGCGATCGATTTTGTGTTTTCGCAAAGTACTGTGCTGGAATTCGGGAGAGAAACCCGTGTCATGGGTGTT  
CGTTCTAGCCGGGTTTGTGTCTCAGGAGGAAGGGTTTTCGACAATCGAAAGGTTCTTTTTTTTTTAAAGAACGACCCGGCGT  
GTGAAATCAGAGAGAGACGGAGGAGCATGGGCTCTTATGGTGCCCGCTTTCGGGAGATCTTTTTCCTTAGATTTTTTTTTCTT  
CTGAAAAGTTGTGCGCCTTTTTTTTGGCGTTGGAGCCGTTTATGTTGGGCATGAGAGATCAATCAAGAGCTATAATAGATATA  
ATCGAGGATTTGTTATGATCTGCCTCTGGTTTTTTTTTTGTGCTTCCATGCATATGGTGCACCTCTCTTTGTGTCAAAAA  
CCTTAACAAAAGTTGCCGACTCGTGTTATTTGCTTGCCCTAGTAGGGGATCGGTTCTTTGACTGACGTTGCCGTGTGTGGTT  
CACAGTATTGGCGTTGTGCGATATCACATTTGAATCGAATTTTGCATTTAGGTAGTGGAAGAGAGAAGTTGCATAGCGACTT  
TCAGGTCCCCATATGGTTGCTGTCCACATTTACCAATTAGTTTATATCTTGTTTATTTTTTTTTTGAAGTCCAGCGTCTCTA  
ATTCTGTGCGTTTGAATTTGATTTTGTGTAGGTGAAGCTTGAATCGAGAAGTTGTGTTAACATCATCAGAGAGAAGGATTAGT  
TCACTAAAGTGCTCGA

>SsLRR-RLK296

CAGAAGGAGATCGTCGAGTCCCACTCCATAACGTGCCCGATATAGAAATAAGAGTGTGGGAGACCTTAACGTTTCCACTCCA  
CCATCTTTTGCCATTCTAACTTCGCTTCCACTCATAATCCACAGTAAACCCCACTCCTCCATTAGTTCCTGCACCTTTGCTC  
GTTTGCTGCCTTAGTCCCCAAGGCGAGCACATCCTCCATTCTTGCATCCAACAAAGTAGATGGGGGAAGGGGAAGTGCGCC  
ACACTCAAGGCAGAGGGGCTCACCGTCGACGATGATGGAGGTTCTCGATGTGACAGGTTTCTAGGAACCGTTGAATGTGAA  
GGAGGTCGATCTCTGCGAAGGGTTGGGCTAGGACCACGAGAGCTCATGGGATGGAGGCCGTGACACGAGGAGAGCTCCCT  
TACCTCCATACATCGGCGAGGTAGTTGTCTTCGTCTCCTTCTTTGAAGGGATTCTTGGTGCTGAATAGTGTCTACGAGGCC  
AGGTCCATCATCTAACTGAATAGTGTCTACATATTTCAGTCTTCATTTCTCTCTATGAGAATTACCAAGGTTTTGAGCCGCT  
TTTACGTTTTTGAAGGAGTTAATCGGGGATGACTCCAAAGCTACCATAGGACTCCTTTACTAGTGGGGCTTGAACCTCT  
CCGGCGCAAGAGTACCTACTTCAACACCCCTTTATATCTTCCAATACGGGATGGCACAAAGCATTGGTTCTACATCTGGGAG  
AGATTGACGAGCTACAGTCTATGACATGACAGGTGAAAGCCTGATTGGAGTCTTAATTCGTCGCCGAGTGCAGCTGATCAA  
GGATCATGTGCATCGATGATCATTTAAAGGGCTAGCAGGATCTGACTAGAGAGTTGAATTAGGAATTTTTTGTGTGACTTAG  
TCGAATTAGAGATTGGGAACCATGATGAAGCGAACGCTGGAAGCTCCCAACTCCTAGTCAAATTAGGAGTTGGGAGCCACATG  
AAGTGAACGCGTGAAGCTCAACAAGGATGAAGAGTCTAATATCTTATTCATCAAATACTATTACTTTTAGTAAAGCCCGCTA  
GAACTCGAATGCTTTTAAAGAGTACAATACACCAAACTTTAAGATTTTTTTTCATTTCTAAATATATTATTGGTATAAATAT  
AGATACATTCTAGTACATATAGTGGGTGTTTGTAGGATGGAGTAGTCTGTGCTGATTCTTTAGTTTTTTGTCTGTGGTTG  
TAAATAGATAAATTGGAACCTTATGACCTTGTTCCTTAAGAGCTAATAATTAGTATTACTACCTTCCAGTCCCAAA  
ATTATTTGACGTTTTAGGTTTGCACCGAAGATTTAAAGATTGAAAAGGTGTGGCGCACAGAAAATAAAATGGAGAGATA  
TAGAGAAATATAGAGATACAAATGTATTGAAAAGGTATATTAGGAAAAGAGTGACAACTATTTTAAACAAAATTTAAATTT  
TGTAATGTCAATTTATTAGGACAAACGGACTAGTATAAAATACCCTATCCGTCTCAAATAAGTGTCACATAGGATGCGTGC  
TAGTTAAATTTTTCTAAGTTTGGCTAGGTTTATGGACAATATTAGTGACATTTATATCTCCAAATAAGTTTATTACAAAATTATAT  
TCAACGATTGCTCTAATCATACTTATATATATATATATTGGACAAAAGTTAAAAATGTTTGACTTCTTGGTAAAGTTAAACTAACA  
CTTATTTTGGCGGAGAGTGTGCGACTATTTTACTAAATTCAGAAATAAATTTATGACGCATCAGCCGATTAGAATGAGTTCTA  
ATCTAAACACTCCAATGCAGTGTGCGTGGGACCGTTTGTGTCAACACATCCTCATCAGCCGATAAACGACCCGTTTGTGTGA  
GATGGACAGTGTGTCAAATCAATCTCGCAATCAGCACAAACCGTCTGACAAAAGTACCAAACTGCCCTCTCCCGTCTAC  
AGAGTCACA

>SsLRR-RLK304

TAGTTTCTATGAACATTAATTATACTGCGACCTAAGTGTTTTGCTGACATGGCAATGTAGTTATTGAAGAGAGCAAAAATCATA  
GAAACCGGGTCTAAGTTAGAAACCATGTCTACACGAGAACCAAGATATGAAAGGATGTAATTGGTAGAGAATGAAGAGAGA  
ATACATGTGATTGGATAAAAAATTTCTGTAAAAACTATCCATTGGGACCATGACTTTTATATGTAGTGTCTATGAAAAATGAA  
TAGGTATTCTAGCATTTGGAACCTGCCTTACAAGTTCAAGGGCCTCTCATGCAATTTAACTCAAAAAAACAATCCAGAGTACA  
AACATTTTTTCCCATCATGTGGATATGACGCGAGACAATACGGTTGAAGTGAAGTAATAATTTTACACCTGAATAATTATGAC  
TTGGCGCTATGTCTGGAAGGCAGCTTGCACAAAATTGCAAGGTAGTATAGTATAAAAAATAAGAAGCATAACCAACAGTAAAT  
TGTAACCATTCATATGCAAGTTGTACCTCTTCTTCAACTAGATAGAACTGAGGCAAGATCAGTTGCTTTCTGCTTATAT  
TCATTCTTTCCATTGGATGAGCTCAGGACAATGGTCTCTGTAGTCCAAGTCCAAGATGCTGATGAAAATGGATGGGCATCAT  
ATTTCCATCAGTGGAAAAAAAATCTAGAACGATTTTCCGTTAGTGTCAAATCTAAACAAAAGTAAACAAAAATGCCAT  
GTCGCTAGCCTAGGAGGGACACCAATGGTCTAGCAGAATTTTTGAATGCTCGATTGTAACCTGGGAGGAGAGAAGGTAGAAC  
CAGAAGAAAGGAAGAAGAACAGGAAAAAGGCGCCTGACTTTTTTTTTCAGAGGATGTTTGGACATACTAACACAGAGCGC  
TGCGGACAGTCGCATTGGGCTCAGTTGGCACGGATCGGCCACAAGAACACTGAGATGGACGCGCACATCCAAGGCACCATC  
TTCTTCACATCTGTAGATTGAAAGGAATGCATGATAGTCTGGACACTTCAAGCAAACTTGGCATGACCTGATGAACCTAG  
CCGTTGGAGGCTGACAGTCCACGGCCACATCCCACCGAGGCTGGAGCTGCAGCTGCCTGCTCATGGCTCCAA  
TATTGAGCGACTGAACCGCTGCCACCTTCGGCTGCACCGGGGACGGGAATGCCACAGGGCGCGATTGGGCGAGGATGGG  
AAAGGGGCGACGCATGCGGGAAAGCGGGAGGAGGAGTTGCGCACCGGATCTCTGACGATGGTAGCGGATAGGGGCTCGAC  
GTCTCCAGAAGCAGCCTCGCTCCCGGACCTGTCTGACCTCCAGGCTCCAGCACCTACCAGGGGGAGGGGCGCGAGATC  
GAGCGCGCCCCGACCTGTGGTCGCCATGTTGGCTGCTGCCGCTGCGCGCCGCGCGCGCGCGCGCGCGCGCGCGCGC  
GGGACGCGCGCGTGCAGCGGTAGGCACGCGCGGCTGCCGGCTTGCAGCGCCCCCAACCATGGAGCCGGCCAGGGGAGCCAC  
GGGGCTGGCCACGGCGGAGGACCGGGCGGTGTAACACACGGTACCGCGGCAGAACGAAGGTGGCGTACTCAGGGAAAAGG  
CGTCTCGAAATCATTAGTCCGGTGCTTGTGTGTTTGGTCCCTAGCTGTTATCGGTGACAAACTTAGTCCGGTAGCTGAAT  
CATTAGCTGGCGTACTCAAGGATTTATGCTTGACATTTCTGATGCTTTCAGATTCAGACATTCAGTCTCCAGCTTATCTTAAAG  
GATGCTAATTTTTGGGATAATTGGCGATCTTGTGATTGTAATTCACCTGTAACCTGATATATTCTTTGGCATTTCAGGTTA  
TCTTGTATTCTTGTCAAGACAACCTCTTGTCTCAGGGCACTGAGCAATCCTTTTGATTATGACCAACTCTGAGTGGTGA  
AAGGATTCAAGAAAGTAGAGAATAGAACCAGG

>SsLRR-RLK159

TACTTCATGATGTCAAAAAAAGATGGAACAAATGCTTATATAATTAGATTTCAACTCAATACATGTCACCCCTAGAAAAAA  
AGAGACGTCCTATAAAATCTAAATAGAGTTTTTCACTAGTTTTTCATGAGCCGTGCTAAAAAAGATAAATTTCTAAAGATTGT  
CTAAAGAAAATGAAGATACATGACTATCGGTGCTCAAGTAGCATATAAAAGAGTGCAATATATTTTTTTTCATAAAAATACAAA  
ATTAGAGTTAATAAAGTTACAATAAACATAGGATTTTTTAACACAAATTAAGGATAAAAAAATCAATATTAAATCAGTGTGTCTCT  
GAACCTAAACGGCAAGTACTCGATCACATACAATTTACCATTTATTTAGGCTAAACAATCACTTTAATGGGCAAAACGGTTATAT  
ATAAACAGGATAAACGAAACAAATGTACCATCATGTCACGTTTAAACGATTTGTAAAGGGGACTAAAGAACCATTTAGATCTG  
TCTGATAAGATAAAAAATTAATAAAATTTCTAAAACCTGTTTCACTTCTGTAAGCTTGTTCGGCTGGCTCGTCAGCCAACCCAGC  
CAACAGTGTTTTTTCTGACATCAAATTAGCATTAGCCATCAGCCACCTGCCAGCCAGCAGTATTTTTCTCTCAGACAAATC  
AGCACCGACCATCAACCAACAGCCAGCCGAACAAAACGGAGTAAATGAAATCGTCATGCATATTTGGTGTGACGCTAACTG  
TTGTGCTGTGTTTTTTTTTTGAAACTTTGCTGGTTGCTGGCAGTGCCGCTGATCAAAAACAACAAGCACTCAGCTGACGGCG  
TACAACGGGACCTTATCCACTCTCACGGCTCGCCATCATAACACACGCTCGGCGGCTCACACCGGAAAGGTGGCACCGGC  
ACGGCACGGGCGCACGGGCGAGCGTCGACCGCACGCACGCACGCACGCGCCCGCCCGGATCGGATCTACGTCTACACGCTC  
ACCCGCGCTACGGGCGTTAAAGACAAAACCCCTCGTCGAAGCACGCGGCCACGCGTCCGCTCCCAACCCAGCCGCGCA  
GGGATCCGCGACGCTCGGACCGGACCCCGAATTTCCCAAACTGCCATGCCATGCCCGTGCCCGTGCCCGTGGGTGGTG  
GAGTGGATTGACGAGCCCCCGGAGGCGCGCCCGGCGGCACGTGACCCCGCTCGGGCAGAGCACCGCCTGCCCGCAT  
CGGGGCGGCCCCCGCGTGGATCCGATCGGGATTAACCTCGCCGCGGGCAGCGGATAAGCGCGGTGGTTAGAATACTAATC

>SsLRR-RLK189

>SsLRR-RLK188

>SsLRR-RLK147

[illegible]

TCCACCAACCGCAGCAGCAGGGGCTGGCTGCCAGGGTCACTGCCGTCATATCCAATCGACCTACACGGCTTCTCTTCATCC  
ATTCATGTGTGGTTAATTCTGTGTAAAAATGCTTGGCTACCCGATATAGCAAAAGTGCAAATTCATCTCTCTGTATTATGTGA  
ATTACATGGTTGTCCAATATATTTTTGTCTTGTACTTGGATTCCCTCTGAGCAAGGTGCTGTAGTTCTGAAATCGGAAG  
AGTACTCTGCTTCAGGGGACATGTGTTTCTAGATGATTTCTTTGGCTGCAACGGCTTACTCTGATAGTACAAAGGTGTAG  
ATTGTTTGAACAGGGTAGCAAATTTACGAGGTGAGGGAGAAGGGAAAGCAAGATACAGAGGCTGCCGCGCCATCGCCGA  
ACGCCAGCCCGCAGCCGCTGCTCCGGCTCTACACTGGAGGTCCACGATTGGACGGCTGTAGTTGGGGCGAGCTCGGCCAT  
GGCTGGCGTGCBCCTACTCAGGCTGGCATTTGGCCGGTGGTGCGACGGTGTCTGGGGTGTCTATCGGGCGCGCTGGCGCGGGT  
GAAGAAGAGGAGATAGCACACAAGGAGATGACGAGGAGCTCCTGTGAGTATGAATGTACTGTTATACCCTTGGGAGTTAAAT  
TGAGGACTAGTACACGGTCCACGATTATATGTTTCGATCCACAACCTAAGTTTCTCAATATGGTTCTCTTAATTTGAAC  
ATTAGATTATTCAATGGATGGCATAGTTTTTTTTAAAGACCGGTAAATTTCTTAGTGTAATAGCAAGAAATTGTGAGTA  
ATGCTACAATTTTATTTAAACAAATACACCCATGATATGATGTCTGATATAAAAAACAAAGAACCATAGTAAGTGAATA  
AAGTTTTTCTATTGCAAGACACGAGTTCTACCTAGTAAAATGCAAAAGTGAAAAATATGACGTTCCATGTACGTTGTCATAAAT  
TAAAAGTTAAATAACCTATGGTATATTAGCTCAAGAACAAGTATTGATAAGATTAGCAGACTCTATGTACGTTGTCATAAAT  
CTAAATTTTTGCACGCTTGTATTAGTTATATATAAAAAACGAATAAGGTTGGCTTTTGGCGTGAATGTACAGAAGCGCCG  
CACACAGTAAAAGGCTAAAGTGGTTGGGTCCAAGTTTGACCGCACAGGAGTCCCGCACGCGCAAGCAACAAAAACAA  
AGTCCAAATGTGCCCGGCAATTCGTCTGTAATCTTGCCAAATCATCCGACTACTCGTGCATCTGTGCTCCATTTTCCGAGC  
TATATCGCCGCCAGTAAGAGGGGTCAAGGTTTTGTTTTTTCGCGGCACGAGCAGCTCCTGCTGTTTCCGCGACCCAGTGTT  
CTGCTTGTCTCCACCCCACTTTGTGCTCGCTTCCACAGCTTCCAAACCGCAACGGCAGGAATTTCTCTCCCTTCTC  
TGCTACGAAATGCTATGTTCTTGATGCGGCTTACGGCCACGAGAAACTATTGAACCGAACCAAGGTTGGATTCTGTATATG  
TCTACCTTTCTTTTTTATAAGAACATAAAATACATCCATTTGGTTTTGTCTTAATTTGCAATTTCTATTGAACAAATTTGTGG  
TAGACTTACTCATAGTTTACAGTAAATACGTAGTTACGTGTCTTCTATCTGAAATTTTCACTGTTCAAATGTTTCTGGG  
TGCTTAACGCTTTCTCCCAAGTATGTTGCCCCACTTTTCTCAAAGAACGATCCATTATAGATTACAAACTGCAAAATTTG

ACCGGGTTGTTCTGGGCGGGGGATCCCCATCGGATGTGTTTAATTTTAAACAAACTTGGTTCTTTCCCTTCCAGGCGCACTC  
GAATTCGCTCAGGATAATCCCCCTTCGATGTGAAGCCATCCAGAGCGCAATTTGTGTTCTTCTTCAATCATTTTCGACAGCA  
AGAAGAAGCATCC

>SsLRR-RLK26

AAGGGATGCCAGTTAGGTCGTTTCATGAACCTTTAAAAATACAATTTTGGGTCCCTAAACTTGTAAAGTGGTGCAGCGCACATC  
TCGAAACGCTGTAAATGGTGCACCACAGTTCCATTTGTAGATCATATCGACCCTTTGATGCACCATTACAAGTTTAGGATAT  
AGAAATGTATTTTCAAAGTTTATTGACCTAAATAGCACATATTTGATAAGTTCAGAGACTATTTCATGCATTGACTCTAAACAAT  
ATGATGGAAAAAGAACCAACAATGGTCCAAATATATTGTCATGATTTTACGTTCCAAAACAGCATGTCTTCAATTGTTGGAT  
GGGAGGAGCGCTCCGTCTCCAAATTTAAGACACGATTGACCTATAATTTATCTCGTACTAAATCCTTCAGTGTACAAAAATC  
ATAAAAAATACGAGAGCACTAGCACCCGGACATCCGGCACCCGTAGCGCGTCCGGGACGCATCTCCAGTCCCGGCCAAC  
CGAACATGGGCTGACGTCGTGGCCCATAAACGAGACCATCTTAGCATCCTGTGTAAAAATAGAAAACTAAAGGAGACTGAAG  
CGCTACCTGCCCGCGTAACGAAAGGGGAGAGCGAGCGCTCGCGCCCATGCCACAATCCCCGGCGCATCCCATCCGCCGGC  
CCCCAGCGCACCTCTTTGCTGACCCTCACTGCGCCACCTCTGCAGTATAAGAAGATAGATATGCAAGGCAGCAGAAGGTGA  
TAAGGAGACACCAAAGCGAGGCGAGCAGAAAAGCGAGGAGGAGATGCAACACCCGATCTACTTTTAAAAACATACAGATACA  
ACACTTGCAACATATGTTTGAAGATAGATGAAACATTTAAACATGCGTTTGAACACTTACAAAAACACATGAAAAACAC  
TTGAAAAACAATTGCAACACATACGTAACATCCGGATAAAACGCTTACAAACATATGTATAAAATATATGCAACATCCAGATAA  
ACACACTTGCAATACACAGATGAAACATTGGGAACATACGTTTGCAACATATATGTATAACCATAGCAACATACGCAACATC  
CCGATCTATTTTGAACATCCATACGAAACCTTTGCAACATACCTCTAAGACATATAAAACACTTGAAACATGAGCTTGCAA  
CATGCGCTTTTAGTGCAAGCGCAATGTCACCTTGCTGCTTGACGAATGGAGCTCGTCGCTGTGGAGCTTAACACCAGAGCG  
GAGCTCGATGCCACGGAGTGCCTGGAGGTTGCCGGTGTGGAGCTCGTTGGTGGCATGGATCTCGGCAGTGGCCACGACGG  
GAGGTGCGGATTACGGCGGGGTGGCTTGGGCGGGGGTGGCGCGGCGCATGCGGCGCGGGTAGAATCGTCGTCGACCCGCGAG  
CGATGGCGCACAAACAGAGCGTCGCGAGCGACGCGGGCGAATAGATGAGGATGAGCCGTAAGGTCTGGACGGGAAACAA  
CGCGAGCGATGCAAGGCGAGTGGATGAGGATGAGGCACGCTTGACGCGGAAGTTCACGGGACGGAAAGCCCGAGCCATATCAT  
TATCGAAAAAAATAAGATACTTCTTTCAATTATGAACCAATGGTATCATCTTTTGTGCGACAAAAAATTACATTTTGAAGG  
CTAATTGTGAGTTGACAAATTACGTGTTTTGAAATCTTAAATGATTCCGCACGTTATAAACAATGAAGGGATTATACGTCATAA  
TATGTCCATCCAGCTGCCTCTCTAGGTTGTTGAGCTAACAGTCCCCAAAGGCACACCAACACAAGCAAGAGAGCAGCACAG  
ATTGTGTCACGCACTGATCCTTGCTTTCATATATACTAATCCGAAACCAAAGACATGCATCATACTGGTTCCCAACACAAAC  
AATTTTACTTGCATCTCTCTCGTGTAGCTTTCTCGTCTCTTGACCATGCTTCTTTGAACCTCCGTCGCCCTCTCATCTCCCAT  
CCACTGTCGCCAGCTTTGCTGCCATCACC

>SsLRR-RLK42

AACTTGTAAAGGGATGCCAGTTAGGTCGTTTCATGAACCTTTAAAAATACAATTTTGGGTCCCTAAACTTGTAAAGTGGTGCAGC  
GCACATCTCGAAACGCTGTAAATGGTGCACCACAGTTCCATTTGTAGATCATATCGACCCTTTGATGCACCATTACAAGTTT  
AGGATATAGAAATGTATTTCAAAGTTTATTGACCTAAATAGCACATATTGATAAGTTCAGAGACTATTTCATGCATTGACTCTA  
AACAAATATGATGGAAAAGAAACCAACAATGGTCCAAATATATTGTATGATTTTACGTTCCAAAACAGCATGTCTTCAATTG  
TTGGATGGGAGGAGCGCTCGTCTCCAAATTTAAGACACGATTGACCTATAATTTATCTCGTACTAAATCCTTCAGTGTGTACA  
AAATCATAAAAAATACGAGAGCACTAGCACCCGGACGTCCGGCACCCGACGCGTCCGGGACGCATCTCCAGTCCCCAG  
CCAAACCGAATATGGGCTGACGTCGTGGGCCACAAACGAGACCATCTTAGCATCTGCGTAAAAATAGAAAACTAAAGGAGACT  
GAAGCGCTACCTGCCCGCGTAACGAAAGGGGAGAGCGGCTGCGGCCATGCCACAATCCCCGGCGCAACCCATCCG  
CCGGCCCCCAGCGCACCTCTTTGCTGACCCTCACTGCGCCACCTCTGCAGTATAAGAAGATAGATATGCAAGGCAGCAGAA  
GGTGATAGGGAGACACCAAAGCGAGGCAGCAGAAAGCGGGGAGGAAGATGCAACACCCGATCTACTTTTGAACATACAG  
ATACAACACTTGCAACATATGTTTGAAGATAGATGAAACATTTAAACATGCGTTTGAACACTTACAAAAACACATGAAAA  
AACAATTGCAACACATACGCAACATCCGGATAAAACGCTTACAAACATATGTATAAAACATATGCAACATCCAGAAAAACACA  
CTTACAATTCAACAGATGAAACATTGGGAACATACGTTTGCAACATATGTGTATAACCATAGCAACATACGCAACATCCCGAT  
CTAATTTTGCAACATCCATACGAAACCTTTGCAACATACCTCTAAGACATATGAAACACTTGAATATTGAGCTTGCAATATGCG  
CTTTTAGTGCAAACGCAATGTCACCTTGCTGCTTGGATGCTGAGGCTCGTCGCTGTGGAGCTTAACATCAGTAGAGCGAGCTC  
GATGCCACGGAGTGCCTGGAGGTTGCCGGTGGGAGCTCGTTGGCGGCATGGATCTCATCAGTGGCCACGACGGGAGGTGTC  
GATTACGGGGGCGGGCTTGGGCAAGGGTGGCGCCGCGCATGCGGCGCGGGCAGAATCCGTCGTGCGACCGCGAGCGATGGC  
GCACAGCACAGAGCGTCGCGAGCGACGCGGCGAATCGATGAGGATGAGCCATAAGGTCTGGACGGGAAACCACGCGAGCG  
ATGTAGGCGAGTGAAATGAGGATGAGGCACGCTTGGACGGGAAGTCAACGGGATGGACGCCCGAGCCATATCATTATCGAAAA  
AAATAAGATACTTCTTTCAATTATGAACCAATGGTATCATTTTGTGCGACAAAAAAATTACATTTTGCAAGGCTAATTGTGA  
GTTGACAATTACGTGTTTTGAAATCTTAAATGATTCCGCACGTTATAAACAATGAAGGGATTATACGTCATAATATGTCCATC  
CAGTGCCTCTCATGTTGTGAGCTAACAGTCCCCAAAGGCACCAACACAACACTACACAAGCAGAGCAGCAGAT  
TGTGTACGCACTGATCCTTGCTTTTCATATATACTAATCCAAACCAAAGACATGCATCATACTGGTTCCCAACACAAACAAT  
TACTTGCACCATCTCTCTCGTGTAGCTTTCTCGTCTCTTGACCATGCTTCTTTGAACCTCCGTCGCCCTCTCATCTCCCATCCAC  
TGTCGCCAGCTTTGCTGCCATCACA

>SsLRR-RLK10

ACGAAAGGGGAGAGCGAGCGCTCGCGCCCGTGTACAATCCCCGGCGCATCCCATCCGCCAGCCCCAGCGCACCCCTCTT  
TGTTGACCCTCACTGTGCCACCTCTGCAGTATAAGAAGATAGATATGCAAGGCAGCAGAAGGTGATAAGGAGACACCAAAG  
CGAGGCAGCAGAAAGCGAGGAGGAAGATGCAACACCCGATCTACTTTTGAACATACAGATAACAACACTTGCAACATATGT  
TTGAAGACAGATGAAACATTTAAACATGCGTTTCAAACACTTACAAAAACATATGAAAAACACACTTGAAACCAATTGCA  
ACACATACGCAACATCCAGATAAAACGCTTACAACATATGTATAAACATATACAACATCCAGATAAACACACTTGCAATACA  
ACAGATGAAACATTGGGAACATACGTTTGCAACATATATGTATAACCATAGCAACATACGCAATATCCCGATCTATTTTGTAA  
GACCATACGAAACCTTGCAACATACCTTTAAGACATATGAAACACTTGAAACATGAGCTTGTAAACATGCGCTTTTAGTGCA  
AACGCAATGTCACCTTGCTGCTCGGATGAATGAAGCTCGTCATTGTGGAGCTTAACACCAGAGCGGAGATCGATGCCACGG  
AGTGCCTGGAGGTTGCCGGTGGCGAGTTTCGTTGGCGGCATGGATCTCGGCAGTGACCACGACGGGAGGTGCGATTACGGG  
GGGCGGCTTGGGCGGGGTGGCGCCGGCATGCGGCGGGCAGAATCCGTCGTGCGACCGCGAGCGATGGCGCACAGCTC  
AGAGCGTCGCGAGCGACGCGGGCGAATCGATGAGGATGAGCCATAAGGTCTGGACGGGAAACCACACGAGCGATGCGAGGC  
GAGTGAATGAGGATGAGGCACGTCGACGGGAAGTCAACGGGACAGACGCGCTGAGCCATATCATTATCGAAAAAATAAGAT  
ACTTCTTTCAATTATGAACCAATGGTATCACTTTTGTGCGACAAAAAGATTACATTTTGAAGGCTAATTGTGAATTGACAATT  
ACGTTGTTTGAATCTTAAATGATTCCGCGCTTATAAACAGGAGGATTATACGTCGTAATATGTCCATCTCAGTGCCTC  
TCTATGTTGTTGAGCTAACAGTCCCCAAAGGCACACCAACTCAAGAGAAAAATTACCAGCGGTCCCTCAACTTGGCAGCT  
GGTGTCACTTAGATCCCCGAACCTTTGAACAGTGATTTCTAGGTCCCTGAACCTTGGCTTCAGGTGTTATCTAGGTCCATGAAC  
TTGGCTTTAGGTGTCACTTAGATCCCCGAACCTTTGAACAGTGATTTCTAGGTCCCTGAACCTTGGCTTCGGGTGTCATCTGGG  
TCCCAATGCTGTATGTCGCGGCTTACATGTGGGGGCCACCTGTCAGTCAGTGGGTATATTTCTATTTGGGGATCTGAGCTAC  
AATTTCTAAATATTCAAAAAATTGTATCTTTTTCATATGATCTCGGGTGAAGATGATTTTATATAAAACTGTAGCTCTCGACG  
AAATCTACAACCTTTCATATAGAAAGGCACACCAACAATTACACAAGCAAGAGAGCAGCACAGATTGTGTACGCACTGTA  
TCCTTGCTTTCATATATAATCCCAACCAAAGACATGCATCATACTGGTTCCCAACACAAACAATTACCTGCACCATCTCT  
CTCGTGTAGCTTTCTCGTCTCTTGATCATGCTTCTTTGAACCTCCGTCGCCCTCTCATCTCCCATCCACTGTGCGCCAGCTTTGC  
TGCCATCACCATGGACATGCTCAACCTCTTGCTCTCATCTCCATCTACGTTGTGTCAGCGTTTACACCGGTGGCGACAA  
CTGACGCCGATGCCCTTCTCCGGTTCAAGGCCTCCATCCAGAAAGACCTTGGGGGTGTCCTCTCGTCTTGGCAGCCGAGCG

GGAGTGACGGCCCATGCAACTGGCACG

>SsLRR-RLK56

ATGAACTTGTC AAGGGATGCCAGTTAGGTTGTCCATGAACTTTAAAAATGCAATTTTGGGTCCCTAAACTTATTAAGTGGTG  
AGCGCATATCCCGAAACATGTAAATGGTGCAACCACAGTTCCATTTGTAGATCATATCGACCACTTTGATACACCATTACAAG  
TTTAGGGATCCAGAAATGTGTATCAAAGTTTATGGACCTAAGTAGCACCTATTGATAAGTTTCAGAGACTATTTCATGCATTTGA  
CTCTAAACAATATGATGAAAAAGAAACCAACAATGGTCCAAATATATTTTCATGATTTTACGTTCCACAACAGCATGTCTTC  
AATTGTTGGATGGGAGGAGCGCTACGTCTCCAAATTTAAGACACGATTTGACCTATAATTTATCTTGTACTAAATCCTTCAGGT  
TACAAAATCATACAAAAAATAACAAAGAGCACTATCGCCCGGATGTCCGGTGCCACAGCGCGTCCGGGACGCATCTC  
CCAGTCCCTAGCTAACCAACATGGGCTGGCGTCTGGGCCACAAACGGGACCATCTTAGCATCTCGTAAAAATAAAAA  
CTAAAGGGGACTGAAATGCTACCTGCCCGCGTAACGAAAGGGGAGAGCGTGCGCTCGCGTCTGTGCCACAATCCCCGGCG  
CATCCCATCTGCCAGCCCCGGTGCAACCCTCTTTGCCGCCCTCGCTACGCCCTCTGTCAGTATAAGAAGGATAGATATGCAA  
GGCAGCAGAAGGTGATGAGGAGACACCAAGGCGAGGCAGCAGAAAGCGAGGAGGGAGATGCAACACCCGATCTACTTTT  
GAAACATCCAAATACAACACTTGGCAACATACATTTGGAGACAGATGAAACATTTAAATATGTGTCTAAAAACACTTACAAAA  
ACACCTGAAAAAACACTTGTAAAAACAATTGCAACACATACGCAACATCCAGATAAAACGCTTGCAACATATGTATAAAACAT  
ATGCAACATCCAGATAAACACACTTGAATATAACAGATGAAACATTTGGGAACAGACGTTTGCAACATGCGTGTATAACCAT  
AGCAACATATGTAACATCCTGATCTATTTTGAACATCCATACGAAACCTTGCAACATACCTCTAAGACATATGAAACACTT  
GAAACATGAGTTTGAACATGCGCTTTTGTGCAAGCGCAATGTACCTTGTGCTTGAACAAATGGAGCTCATCTTGTGG  
AGCTCAACACCGGAGCGGAGCTCGATGCCACGGAGTGCATGGAGGTTGCCGGTGACAGAGCTCGTTGGCGGCATGGATCTCG  
GCAGTGGCCACAACGGGGAGGGGGGCGGCTTGGGCGGGGCGCGCGCCGCGCATGCGGCGCGGGCAGAATCCGTTCTTGCGA  
CCGCCAGCGGGGACACAACACAGAGCGTCGCAAGCGAATGAATGAGGATGAGCCATAAGGTTTGGACGGGAAATCACG  
TGAGCGGACGGGCGATCTCCAGTGCACCATTTAGCAAGTTGAGGACAGCTTGAGCGGGAAGTCAACGGGACGGACGCCATTCAT  
CGAAAAATAAGATACTCTTTTATATGAACCAATGGTATCACTTTTATGCGACAAAAATTACATTTTGAAGGCTAATTATC  
AGTTGACAATTACGTGTTTGAATCTTAAATGATTCGCGCGTTATAAACGATGAAGGGATTATACGTCTAATATGTCCAT  
CCAGCTGCCCTCTATGTTGTGAGCTAACAGTCCCCAAAGCACCAACAACAATTACACAAGCAGAGCAGACAGA  
TTGTGTACGCACTGATCCTTGTCTTTCATATATACTAATCCCAACCAAGACATGCATCATACTGGTTCCCAACACAAACAA  
TTACTTGCACCATCTCTCTCGTGTAGCTTTCTCGCTCCTTGATACCATGCTTCTTTGAACTCCGTCGCTCTCATCTCCCATCCA  
CTGTCGCCCCAGCTTTGCTGCCATCACCAT

>SsLRR-RLK57

AGCTATAAATAATAGAGTTAAATACATCAGCGATCCATGAACTTGTC AAGGGATGCCAGTTAGGTGCGTCATGAACTTTAAAA  
TAAATTTTGGGTCCCTAAACTTGTTAAGTGGTGACGCGACATCTCGAAACGTTGAAAAATGGTGCACCATAGTTCCATTTGTA  
GATCATATCGACCACTTTAGATGCACCATTAAGTTTGAAGTATATGATTTTCAAAGTTTATTGAGCTTAAATAGCACATA  
TTGATAAGTTCAGAGACTATTTCATGCATTTGACTCTAAACAATATGATGAAAAAGAAACCAACAATGGTCCAAATATATTTTC  
ATGATTTTACGTTCCAAAAACAGCATGTCTTCAATTGTTGGATGGGAGGAGCGCTCGTCTCCAAATTTAAGACACGATTTGAC  
CTATAATTTATCTTGTACTAAATCCTTCAGTGTTACAAAATCATAAAAAATACGAGAGCACTAGCACCGGATCCGGCCCCAGC  
GTCGCGGAGCGCATCTCCAGTCCCTAGCCAACCGAATGCGGCTGGCGTCTGTGGCCCAAAACGGACCATCTTAGCATC  
CTGCGTAAAAATAGAAACTAAAGGGACTGAAGCGCTACCTGCCCGCGTAACGAAAGGGGAGAGCGAGCGCTCGCGTGCC  
ACAATCCCCCGGCGCATCCATCCGCCAGCCCCGCGCACCTCTTGGCGACCTCACTGCGCCACCTCGCATATAAGAA  
GATAGATATGCAACATACGCAACATCCCGATCTATTTTGAACATCCATACGAAACCTTGCAACATACCTCTAAGACATATG  
GATCTACTTTTGAACATACAGATACAACACTTGAACATACATGTTGAAGACAGATGAAACATTTAAACATGCGTTAAAC  
ACTTACAAAAACACCTGAAAAAACACTTGAAAAAACATTTGCAACACATACGCAACATCCAGATAAAACGCTTACAACATAT  
GTATAAAACATATGCAACATCCAGATAAACACACTTGAATATAACAGATGAAACATTTGGGAACATACGTTTGAACATATGT  
ATAACCATAGCAACATACGCAACATCCCGATCTATTTTGAACATCCATACGAAACCTTGCAACATACCTCTAAGACATATG  
AAACACTTGAACATGAGCTTGCAACATGCGCTTTTGTGCAAGCGCAATGTCACCTTGTGCTTGGAAATGGAGCTCATCG  
TTGTGGAGCTTAACACCGAGCGGAGCTCGATGCCACGGAGTGCATGGAGGTTGCCGGTGACAGAGCTCGTTGGCGGCATGGA  
TCTCGGCAGTGGCCACAACGGGAGGTGCGGGGGGGCTTGGCGGGGGGCGCGGCATGCGGCGGGCAGAATCCGT  
CTGCGACCGGAGCGGGGCACAACACAGAGCGTCTGCGACGCGAATGATGAGGATGAGCCATAAGGTTGGACGGGAAATCA  
CGTGAGCGACGCGCGAGTGGATGAGGATGAGGCACGTCTGGACGGGAAGTCAACGGGACGACGCCCCAGCCATATCATT  
ATCGAAAAATAAGATACTTCTTTTCATATGAACCAATGGTATCACTTTTATGCGACAAAAATTACATTTTGAAGGCTAATTA  
TCAGTTGACAATTACGTGTTTGAATCTTAAATGATTCGCGCGTTATAAACGATGAAGGGATTATACGTCATAATATGTCC  
ATCCAGCTGCCTCTCTATGTTGTTGAGCTAACAGTCCCCAAAGGCACACCAACAACAATTACACAAGCAAGAGAGCAGCACA  
GATTGTGTACGCACTGATCCTTGTCTTCATATATACTAATCCCAACCAAGACATGCATCATACTGGTTCCCAACACAAAC  
AATTACTTGCAACATCTCTCTCGTGTAGCTTTCTCGCTCCTTGATACCATGCTTCTTTGAACTCCGTCGCTCTCATCTCCCATCC  
ACTGTGCCCCAGCTTTGCTGCCATCACCA

>SsLRR-RLK98

AATTTTTATACTACTCCCTCCATTATAATTTATAAGACGTTTGGTTTTTATGTTTTTTTTATGTACGTGGATATACACTATATCTA  
GATACACAGGAGAAAAAACAAATATGTCTAGGAAAATAATATCAAAATGTTTTATGATTGCGAAGCAAGGAATACTTTTTTATA  
AAGTTTGAAGTGGATTGTAACCTGATTTATTTGTACGCAAGGAGTAGTATTTGATTGTCTCTAAATATAAATAACATTTGTTG  
CTATATACTGTATCTAGATAATAAATCTTAGTACTTGCTACAAATCTATAGTAGTACTGGTACATCAGAGATACAATTTATTAT  
TTTGAGATCGGGGTATCTGCGCTTGGGAAAGAGGAGCGTGAATTGATTATACTCATATATTAATTAATTAATGTAGCAGAGA  
GATTGTATGGCTCTGACAGCCAACAACAGTAACCTCCGCGCAAACTTGTGGCTGCTGCCGGCGAGAGATTTCCGTTTCT  
TCGTTTTCGTTTTTCCAAAAACACTTTGATTAATATATATTAATAATTAATTTATGGTACATAATTAGTATTATAGAAAG  
ATTTTTAAATCTAGTTTTTTTTAAATATTAATTTATTTGAAGATAGAAAAATGTTGCATATATTTTTATAAATCAACTTAACTT  
ATAGTATGACATGACAGATATTTAGGGACAGACGGAGCACACTGGTTATGGCTACAGGCTACAGCTACGCTGGGTGCGCG  
GCATGGAGGAACGGAACGGGACGGAACGGGAATCACACTCCAACCGCCCGCAGCCCACTGTGGCTAGGCGACTGCTGAC  
TGCATTCAACTCAGACCGACTGCAGCCGTTCCGGTAAATCGTCTGCAGGACGCGGATGGCTGCACCGGCTACGCTACG  
CCACACGGTATCGTAGCGGATGGGCGGACGTCCGCTACTCCCGCGGATGAGCAGAGCGTCCGCTACGCGCTCGTGGTG  
CGGGCCGCGCGGTCTCGTCTTCACTCGTGTGCGGCTGCGGAGGGAGTGGGTAGGGGGGAGTTAAAAAAGAAAAA  
AATCTGATGATGGTCCCATCTAAGTATAGAGGATGAATATAGAGGATAGATGGATGCGGAAGAAAAATGGTATAGAGGAGA  
GAATCTCGATGACCAGGATAAAATATTCCTTTTAGAGGATGAGTATAGAGGATAAAGAGTGGGATAGCCTCAACTCTTCCAT  
TCTCCAACAAAAGACTGCGTCTGACCTCACTGACGACGCAACCTCTCTGTGCTCTCTCCCGACGACGAGGCAACGCGC  
GCACAGCTGCACACGCAACGCAATACGAGGAGGAGGTGGACGGGGATCGGGGACGAGGGGTGCGTGGACTTTGGAGTCT  
GGACAGCAGAGCAGACTGCCATCCCCGCCACCTCGCACGCGCACACACCTTTCTCCCTCCCTCCCTCCCTCCGTTCTCTCT  
TCCCTTTCCCTGCTCTGCTTCGCTTTCAACCAACCTACTCACGCCCACTCCACTCCCTCCTCGCACTCTCCATCATACCAC  
CGCAAGCCCTGCGCTCTGCTCTCCCTCCACCGCACGCGAGAGCAACGTGCCAAGGAGCAGAAATCCCAACGCG  
CGCTGCCGCTTGCATCGGGATGCCGCGCGCGCGAGCCCGCAATTGCTCCCTCTCTCTCTCCGCGCGCGCGCGCGGTGA  
CCGGTCCCTTCCATTCCCGCAACCAACAGCTCGCGCTCCGCGGGTGCCAGCCCAATCCCTGAATCTGAATCCGAATCC  
ATGCAACCAAGCGCGCGCGCCACTGCTCTGCTCCGCTCCCTGCTGCTCTCTGCGCTCTCTGCGGCTGCTGCTGCGGCG  
GCGCGCTGCGGACCCTAACCCGGCGCGGTGCCACCCGACGACCTGCGCGCGCTGCTTGCCTTCCGCGGGAACCTCACGT  
CCGCGCGGACGCTCTCTCT

>SsLRR-RLK77

GTTCCCTGGTCTTGGCTCCGTGCTGTGCCTCAGGACAAATCGATTTC AAGCTGGATGGATGCATACGGGTGGCAACCTTGGT  
CCAACAGTCAAATTACCATGGTCTGTTCGGCAGGCTGTTTTTTGGCTTATAAGCCGGCTGTAGCTGATTGTGCTGTGAGAGA  
AAAACACTGTTCCAGGCTGATAAGCCGTGCTGATAAGCTCAGCCGAACAGGGGGCATTCTAGTTCAAGTGGCGGTGATA  
CCCTCCCTCCGTCCGTGTCTGCAACATACTGTAAATTTAATTCATAATAACAATAATAGCATATCAAGCCAAACCTTGTAACT  
TTGCCTCGAATTTATACACACAACGAAATATGAATATTTATGCCATACTTGCAATCGTTTTAAATTTGTAAGTCATTTTTAGATACA  
CAGCTAGTGTGGGAGCACTGAAACATTTGTTCCCGTTGCGGGTGGCTTGATACACTTGAGCTTATTCAGTGCTACTTTTT  
AGTCATGGAACAATATTTTCTCTCACAAATTTTAGCATAAACATAAGCGTAAGCCAAATTCAGTATAAGCGAACAGGGGT  
TGCAGCAACAGTTGCGTTTAGGTGCAACGAACATGTCTACAGATATTTACTTCGCATCTAGACATAACCCATATCTAGGTGCA  
CTACAAAACCTTTGAACCTAAAAAAAATGCCAAAACGACTTATGATCTGGAACGTAGTGAATAATTGTTATGAAAATATATT  
TGCATTATATATATAATATAATAATAATTTTTTATACTACTCCCTCCATTTATAATTTATAAGACGTTTGGTTTTTATGTTTTTTTAT  
GTACGTGGATATACACTATGTCTAGATACATATGAGAAAAACAATATATCTAGAAAAATAAACCAAAATGTTTTATGATTCCG  
AATAAAGGAGTACTTTCTTTATAAAGTTTGACTGGATTGTACTCCGTATTATTTGTACACAAAGGTAGTATTTGATTGTCTCTA  
AATATAAATAATACATTTGTTGCTATATACTGTATCTAGATAATAGTAAATCTTAGTACCTGTCTACAAAGCTATAGTACTAGTA  
CATCGGAGATACAATTATTTATTTTGAGATCGGGGTATCTGCGCTTGGGAAAGAGGAGGCGTGAATTTGATTACTCATATAT  
TAATTAATTAATATAGCAGAGAGATTGTATGGCTCTGACAGCCAACAACCAAGTAACCTCCGCCGCAAACTTGTGGCTGCTGCC  
GGTGAGAGCTAGTATGGCGTGTGGGTGCGCGCATCGAGGAAGGGAACGGGACGGAAACGGGAATCACACTCCAACCGC  
AGGTGCAACGAACATGTGCTAGCAGATTTACTTCGCATCTAGACATAACCCATATCTAGGTGCATCAAAAACCTCGAACACT  
ACTACTCTGACTGCATCTGACCTCACTGACGCACGCAACCTCTCTCTCGCTCTCGCTCTCTCTCCCGACGCACAGCTGCACAC  
GCAACGCAATACGAGGAGGAGGAGGAGGTGGCCGCGTGGACGCCGACGGGGATCGGGGACGGAGGGCAAGCGAGAGTG  
GACTTTGGAGTCTGGACAGGACTGACGCTCCCTCCGTAGCAGAGCACTCGCACGCGCACACACCTTTCCCCCTCCCTCCG  
CCTCCTCCTTCCCTTCCCTTCCCTTCCGACTTCCGACTTCCGACTTCCGACTTCCGACTTCCGACTTCCGACTTCCGACT  
ATCACCAACCAACAAGCCCTGCGCTGCGCGCTCCCTCCTTCTCCACGGCACGCGAGAGCAACGTGCCAAGGAGCAGA  
ATTCCACAACGCCGCCGCCGCTTGCATCGGGATGCCGCCGCCGCCGAGCCCGCATTGCTCCCTCTCTCTCTCTCCGCCGCC  
GCCGCGTGACCGGCTCCCTTCCATTCCCGCAACCACACAGTCGCGCCTCCGCCGGTGCCAGCCCAATCCCTGAATCCTGA  
ATCCGAATCCA

>SsLRR-RLK140

CAACACATTGTAAATTTAATTCATAATAACAATAATAGCATATCAAGCCAAACCTTGTAACTTTGCCTCGAATTTATACACAC  
AACGAAATATGAATATTTATGCCATACTCCATCGTTTTAAATTTGAAGTCATTTTAGATACACAGCAAGTGTGTTGGGAGCAC  
TGAAACATTTGTTCCCGTTGCGGGTGGCTTGGATACACTTGAGCTTATTTAGTGCTACTTTTTCATTATGGAACAATATTTT  
CTTCTCACAACTTTAGCATAAACATAAGCATAAGCCAAATTCAGTATAAGCGAACAGGGGTGTAGCAACAGTTGCGTTT  
AGGTGCAACGAACATGTGCTAGCAGATTTACTTCGCATCTAGACATAACCCATATCTAGGTGCATCAAAAACCTCGAACACT  
AAAAAAAAGGCCAAAACGACTTATGATCTGGAACGTAGTGAATAATTGTTATGAAAATATATTTGCATTATATATATAATATA  
ATAATAATTTTATACTACTCCCTCCATTTATAATTTATAAGACGTTTGGTTTTTAGATTTTTTATGATGCTGGATATACACTATG  
TCTAGAAACATAGGAGAAAAACAATATGTCTAGAAAAATAAACCAAAATGTTTTATGATTGGAAATGAAGGAGTACTTTCT  
TTATAAAGTTTGACTGGATTGTACTCTGTATTTTGTACACAAAGGTAGTATTTGATTGTCTTAAATATAAATAAATAAATTT  
GTTGCTATATACTGTATCTAGATAATAGTAAATCTTAGTACCTGTCTACAAATCTATAGTACTAGTACATCGGAGATACAATTATT  
TATTTTGTAGATCGGGTATCTGCGCTTGGGAAAGAGGAGGCGTGAATTTGATTATACTCATATAGTATTAATTAATTAATGTAG  
CAGAGAGATTGTATGGCTCTGACAGCCAACCAAGGACTCCGCCGCAAACTTGTGGCTGCTGCGGCTAGGAGTGA  
TGGCGCTATGACTTATGTGTTTAGTTCGCGACAAATTTTGGCTTTGGTTACTGTAACATTTTATTTGTATTTATCAATTAGTGT  
CTAATCATAGATTAATAGGCTTAAAGATTTCGTCTCGTGATTTTTTACCAAACCTGTGTAATTAGTTTTTTTTTACATTAAATGCT  
CTATACATATGTCCAACATTGACAATGTTGAAAAATCTGGGTAACATAAACACCCCATGCGAGGTACAGCTACGCTGGGGTGC  
CGGGCATCGAGGAAGGGAACGGGACGGAACACCGGAATCACACTCAACCGCCCGCAGCCCATGTGGGTGAGCGACTGTG  
GACTGCATTCAACTCTTCCATTGTCCACCCATGACCCAACCACACCACAAAAGACTACTCTGACTGCATCTGACCTCACTGA  
CGCAGCAACCTCTCTCTCGCTCTCGCTCTCTCCCGCAGCAGCTGCACACGCAACGCAATACGAGGAGGAGGAGGAGG  
AGGTGCGCGCTGACGCGGACGCGGATCGGGGACGAGGGAAGCGGAGAGTGGACTTTGGAAGTCTGGAAGGACTGA  
CGCTCCCTCCACAGCAGAGCAGACCGCCATCCCGCCACCTCGCACGCGCGCACACCTTTCCCCCTCCCTCCGGCTCCTCCT  
TCCTTTCCCTGCTCTGCTTCCGCTTTTCGACCAACCTACTCACGCCCACTCCACTCCCTCCTCGCACTCTCCATCATCACCACC  
ACCACAAGCCCTGCGCTGCGCGCTGCCTCCTTCTCCACGGCAGCGAGAGCAACGTGCCAAGGAGCAGAAATTCACAA  
CGCGCCGCCGCCGCTTGCATCGGGATGCCGCCGCCGCCGAGCCCGCATTGCTCCCTCTCTCTCTCTCCGCTCCGCC  
GCGTGACCGGCTCCCTTCCATTCCCGCAACCACACAGTCGCGCCTCCGCCGGTGCCAGCCCAATCCCTGAATCCTGAATC  
CGAATCC

>SsLRR-RLK226

TGTGACATGGTGACCTCCTGTTAATGAAGAGGCTTACGAAGCACAAAGAAGCAATTCGAAAGCTGATTTCAGAACATGCA  
TTCTTCTCTCTCTCTCTCTAGTTTCTCTATCTAGTTTACTTGAATCTCGGGGACGAGATTCTTCTAAGTGGGGTAGATCTGTA  
ACACCCGTATTTTGATCATGTGTAATAAACCACTAAAAATTTGAACTTTTAAAAATTTTATAACAAATTAACCTTGACTATTT  
ATTCTCGCAAAATCCTTTCTAAATAAAATGATTTCCAAAACCTTGCATCAAAAGTTACCATATGCATTTCTTCGCTTGC  
GATTGTTTGACTATTTGTTTGACTGAATGCTTGCTTGAATGCTTGATGCTTGCCCTTCTAGAATTTATGCGGCACCAA  
AATAGTATTAACCTGGACCTTAGTGTAAGGACCTTTCTCAATAATACAATAGTAGATAATACACCTGTGTTAGTTTGTATTAC  
AATATTAGTTATATTTAGTTTCTCTCTATATATATGCATGTATATTCCTAGCAGTATATCCCTTGCCATAGTATAAAAAAAT  
GCCACGCTTTCCTTTAGTTTATACATACAGGTCATGCCATAGTCTACACACATATGCCTCCCTTCAATTCGGTAGAGCATATG  
TATACATACTTTAATCATACATATATCGTATGCATACATATACTTGCCGTGAATCATATAGATGTATATATATTGCTCTAGTTTAC  
ATACATCATATACCGACATGCACTAGTGTATATACATGCCTAGTTAATACATATGTATATCCATATGTATGTACATATATGCACTT  
CTGAGATTTTGAAGATGCAAAAGCAACTACTGTGTACGCTTCCCTCCCAAACTGGCTTGAAGTGCTAGCTCCTCGGCACAGG  
CAGAATAGCGCAGGACACAGCCAGCTCAGCTCGGCCAAAGCCGAGCAACGCACACGACGCGGTGTCTACTACGCGTCGA  
AACCTCGTAAACGCGCGGAAGCTGTCTTCCACCTTGCACACGACGGGATATTTCCGGCAGTCAGCTGACTCACTGTGCG  
AGGTGCGCCACGGCCGCTATGTCACGTCCCGTGAACAGCTGGAGCTTGCAGCAACCCCTGGCCACCGAGATATTTCTTCG  
GACCGCCTTACTGTGACGCGAACTCGGCTATAAATAGCCGGCCATCGCCACTGCGCGGAAGCACTCGACGGAGCTCGAGGA  
GGAGGTGCCGACGAAGTCTGGGACACATGAAGCTGGAGAACGAGCTCTGCTTCTTTCGGCTGCTTGCTCCAGCAACGTC  
GACGAGCCAGCCCTTGCCCTCGCGGTAACGCGGACCCAGCCCTCGCTGCGAAGCTCCTNNNNNNNNNNNNNNNNNNNNNN  
NNNNNNNNNNNNNNNNNNNNNNNNNNNNNNNNNNNNNNNNNNNNNNNNNNNNNNNNNNNNNNNNNNNNNNNNNNNNNN  
NNAAAGCTCTCACCCACCCTATGAAAAATTTAGCATTTTGGATGAACTAAACACACCTTTAAAAATTTGGCATTTTGCATTT  
CATCATTTCAAAGTAGTTGGTATTTTGCAATTTGCATTCCATGAGGAACATAACACGGCCTAAGAACTTTAGAGATGGGTCT  
CAATCATGACAGGTACTACCTACTTTATAAATCACTTACCTGAAGAATTAGGACAGGTGAGGTGAGGTGAGGTGAGGTGAG  
ACTTGAGCTGACAGTCAAAACCCAGAGTACCTTCTCTCTTCTTCTTCTTCTTCTTCTTCTTCTTCTTCTTCTTCTTCTTCT  
TCTTCTTCTTCTGCAAGGGAACAAGAAGAGCAAGGCAGCAAGCAAGACTGAAGAAGGACGATCTGACCATGATCCCAAGATG  
TGAGAGAACACATGGCGCTTGCTTATCGTCACCATTAGCTAGCTAGCTACTAGCTCCTTGTCGACGTTGTGCTGTGGCAAGG  
CAGGCCGAGATCGACA

>SsLRR-RLK261

AATAATAATGGCGCTAGTAGCACATTTTGATTAGAAATTACATCAGATGGATGTTAAGACGGCATTCTTAAATGGGGATCTTGA  
GGAAGATGTCTACATGGCACAACCGAAAGGTTTTGTCATGGAAGGAAATGAGAACATGGGGTGCCGCCCTAAGGAAGTCTAT



TTATGGACTAAACAAGCTTCAAGACAGTGGTATTGGAAGTTTGATAATACAATAAGAAAGTTTGGGTTTAAGGCAAATGTA  
GAGGACAATTTGTTTTAGTAAAGTTTAAAGAATTTCTAAGTTTCATCTTCTGTCTATATGTGGATGATATTTGCTAGCAAGCAAT  
GATGTCACCTACTAATGGAGACTAAAGAAGTTCTTGTCCCTGCATTTTGAATATGAAAGACCTCGGTGAAGCTTCTTTTGTCTTG  
GGGATTGAATTCACCGTGATAGAAATAGAGGGGTATTAGGGCTGTCACAAAAGGCATACATAGAAAAGATTCTTAAGAAATA  
TAGTATGCAACAAGTGCAGTCCATCACCTGCACCCATAGTCAAGGGCGATAAGTATGGGGAACACCAAGTGTCCCAAGAATCAG  
ATCGAGCTCGAGCAATGAGATCAGTACCTTATGCTTCAGCCGTGCGAAGCTTACAATATGCTCAAATTTGTACTCGCCCTGA  
CATAGCGTTTGTTACCGGTTACTTGGCAGATATCAGAAAAATCCAGGTGCAGAACACTGGAAGTTAGTTAAGAAAAGTCTTG  
CGTTACTTGCAGGGCACTAAAGGCTTCATGCTAAGTTATAATAAGACGGACTCCCTTGAGATAGTGGGGTTCTCAGATTCAAG  
ATTATGCGGGGGATGAAAGGAAATCCACGTGAGGCTACATATTCACCCTCGCAGGTGGAGCCATATCGTGGAAAAAGCTCCAA  
ACAGACTCTCGTCACGTATCGACGATGTACGCTGAGTTTGTAGCATGTTATGAGGCCTCGGGGCAGGTGAGTTGGCTTAAAG  
AAGTTTTTGCCCGGATTAAGAGTGGTAGATAGCATTGAGAGACCACTTAAGTTATACTGCGATAATAATCCCGCAGTTGAATA  
TGCTCACAATAATAGTGCAAGTGGTGCTGCCAAACACATTGACATCAAGTACTATGTTGTGAAAGAGAAAAGTTTCAGGATCAT  
GTTATAAGCCTTGAGTATATTAAGACGGATAATATGTTAGCGGATCCGCTCACAAAAGGCCTACCACCAACGTTTAGAAA  
ACACCTAGCCGGCATGGGGTTAAGGGGAAAGCCTATGATTCCTGAAACACTTAGGGCCCTTTAGTTAGAACTTTATCTCAAATTA  
GAGAGATGTACTGTAGCCGTCAAGTCCAACAGAAATTGTTTCTGTGACGACGAGACGCGCTCTACGCATTTCTTTATAATGA  
GACGGAGTTAAGTATTAAATTAAGAATAAGACAAGGTTAAGATAAGTTATTAGAAGAGATCAAGGGGAGAATGTTAGGGTT  
TTGATCTCTCCTCGGTGACCCAACGGCCATTAGGGACCTTGATCCGCTCCTTGATCGGGGGAGAGCAACCCACCAAGATCG  
TTGGAGGGCCCTGTACGTGCGGTAAATAAATAGTGGTGGGAGGCCGGGGCACGGTACACAAGGTTTACC GCCGCCACTG  
TTCCACCTACAAACCTTAGACCCTACTCCGTTACAGGGACCGCACAAAGTGACGGGAAGCCCTTCTCCGCCGCCACTGCG  
CCTCAAAGCCGACATGGCGGACTCCAGCACCTCGGCGCCTAAAAC TGACGGTGCACACTTCTCCCTATCTCCTTCTCTTG  
CTAAAGGGACAAGCTCTTTCTCTGTTTAGTTAAGCAGCATTAATCTCACTGTTAGTAGATCTANNNNNNNNNNNNNNNNN  
NNNNNNNNNNNNNNNNNNNNNNNNNNNNNNNNNNNNNNNNNNNNNNNNNNNNNNNNNNNNNNNNNNNNNNNNNNNNNN  
NNNNNNNNNGGCACAGAGGATGCACAAAGAC

>SsLRR-RLK418

AAGTAGCAATATAGTGATATTTCAACCAAAAAAACATAATCGAAAAGGTTTCTACCTGATCTGTTTGCAGAAAAGGACTCGAA  
ATAACTATAATAGAAAAAAAATCAATAATAGAGGTTCATAATGAAACCTAGAAAAAAGGTCAAAGGAGATAAACTAGATCC  
AACATAGTGATTGATATTCATATCATTGAGAAGAGAAACATCCACTTAATAAAAAAACAAAATATAAATTATCTCTTTCTCCC  
AACCACGATTTGAGCGGTTGACGTTGCTTCCCACCTTACAACACGCGGATGGGCCAGGGATACCTTAATACCTAGCGTCGGAT  
AAGACGATGGTAAGTTCATGCTAAGAATGTTACAAAAGCATGGTAGTGTTAAAAGTGGGAAGTAAGTTCATGCTACATGCTC  
AATGGCAGAGACCGGAGAGATGAGTGCACCTAAAACTATAGACCTAGTAGCCCTTATTATGATCACCGAAATCAATGAAGA  
TAACAGTCAACATCGGATTATGAGTGTTCGATCACAAGACCTTGCTCCATAGCTTCAACCAAGGAATAGAGCAACGATCAATG  
GCAGAACTTATGCTAAAACTGCAACCTTTTGACAACGACAAGGAATGCGAAAAATTAATAATTCCTTAGGGCCCATTTGGTTA  
TCACGGATTGACCCCTGGAACAATTCCTAGCCGGATTCTTCTCTAATTATATAAGATTTTCATCATCTGGAATAATCCCTGG  
GGGAATCCAGACTAACCCGCACAGGGCTTAAATAGTTTAGATTGAGGAGATATGAATGTACGAAATGGTACAGTAAAAAGT  
ACACTAAGGCTTAAAAATGTAGCTCGAGGTCATAGCGGCTATGAAATGTAGGTGCAAAATGTTGATGTTATTATAACACCTATTCT  
AGCAACAAAGAACACTAATAAAGTCATGAAGAGCTAAACATGGAGCAAAGTAAGTTAGAATGGTACTAACCATATTGCGCTA  
CATATAAATCCAGCTGCTGCAAACTCTTCCAAAAAACACATAGCCACCACACTAGTTAGAACTTCGTACCTACGCCCTTTTTT  
TCTAAATTTAGGTATTTTGGTTTTTCTAGGCATATAGTTTTGTTATGTACCTCAACATATTGTATATTAGGCATATAACAA  
AGGCTATTATAATAGTTAAAGAAGCCAAAACGACTTATAATTTGAAACAGATAAAATATCTTACAAAAGAAACAAATTG  
CTCGCCAGATAGAATGAAATGCATACTATCTATTCTTGTAGACTTAGAAGTCTTAATAATGTAAACATTCTGTTATAAAAAA  
CTCAAAATCATGACAGAGAAATATCAAACTTACGTACGGCTTGACCTTCTAGCATTTTCATTGCGCAAGGACACCGAAC  
GGCAACAGAAAAGAGCAATATCCCTAGAAAAACCCATCTGTCAGTTGCCATGCAACACGCAAGGCTAGTGCAGACATCGATG  
AAGTCAAAGCACCACTAATCTACTACTCGTACACGCACTTGATCCTAATATTCTCTCTGATCAACTAGCCATACTTACCCTT  
GTCAGTTGTAGACAATTGCAACTTGGTCTTAATTAGAGGCTTAAACTGCGGCCCTTCACACGCGGAATCTCAAAAAGTCACA  
GATAGTTACGCCACAAGGGCAATCTCAAAAGTCAACCCTGAGCCCTGCCCTGCAAGTGCAAGGCTCAACACGGAAC  
ATGACTTGCAGCGCATTTGCAGTTACTACTAGCATCATGTGAGCTGTCTGCGGTTGACCTGCATTTTGATAGGGCATGAGCCA  
GTAATTGACAGTTGGATACTCTATTCTTTTCATCAAGACTCAAAAGTCAGAGAGCTGGGCATGAATCTTTGCATTAAGACAAG  
ACAATTGGAAGCTTCTCTTCGGATCCTCGTCTAGGGTTGAGAATTCTGTGATCCCATTGACTACAACCATGCGTAGCGCCCG  
GAACCTCAGCAGGTTCT

>SsLRR-RLK395

TTAGTCCCTCCATGCAAGGTTGGTTTCGGCCATATGGTCACTGTATCGTAGAGATTGGTATGGCTGGGCAATCACGGCCCTGTA  
GTGTGTTGAACTTTTCAGTTGGACTACCGACTGCTGGCCTTGACCGCTTACGCGAGTGTTATGTAACATTACAGAGTTGACC  
CTGGGGGAGAACTTTCTGGCCTTGTGGCTTGTGGCTTTCGGCTTTCGGCCACCCCGGTTGTGACTTCTAGTTGGTTTGCCTGGG  
GCAACCGTTGTATGCTGGCAAATGGTAGTTGCAATATTTAATCAATGTACAGCAAGAGATTGCATCATATTATGTTGGATTGGA  
ATGTTTCGAGGATTAATGATGGAGCCAAGAAAAGCGGCTGTGCGAAACCAAATAATTTCTCTGAAGCCACAGTGGTATGTCT  
ACAGGAAACTGAAATGCAACATGGACGTATTCACTGTTAATGAGATGGTTCGGGGCAGACATGGCAACAAACTTTGTGCTC  
CTGCCTTCCGCAGGTGCTTTCGGAGGAATTTAATTGCAGTGTGAGATCGTTTCTTCGAACCTTCAAAACCCCGCGCTCATGGC  
AAATACTATCTCGGCTACTATCACAAATGTTGGCCGAAAATATAGACTGGTCAATTACAGGAGTTTATGGTCTGACGGGGAACA  
ACGAGAAAAATCTTATTCATGCAAGAGATCGCAGATCCAAAACAACAATGATGCCTGCTTGGCTGCTACTAGGTGATTTCAA  
CCTAATATACCGTGCTGAGGACAAAAAACGACGCTTAATCTCCCTATGCTCAGCAGATTCAAGACTACCATTGATAATCT  
CTTATTGGCGCCTTTTGATCTTAGGGGAAAGAAATATACATGGTGAATGACCAACAATCGCCGACGATGACAAAAATAGATC  
ACCTGTTCTGCACAGGTGAATGGCTAGATATTTTCCAAGAACGACCTCCATGCTCTTGCTTCCATAGGTTCCGACCATTGC  
CCACTACTCCATGGAGATGTAGTTTTTGACTTCTATAGAGGATTCGATTGCAAGCTTCTGGACCAGATGTCGGGGCTTCTC  
TGATGCAGTGCAAGAAGCTTGGAACCCGGTTCTCAACAAGACGCGATACTGTGGGTTCAAATTACTGCGGACTGCAAAGG  
CTTTGAAAAACTGAGGGCGGAAACAGTTCAAGTGGATGGAATTAAGTTGGGCAACGAAATAGAGAATATTCTAACAAAAA  
TCTCTACAACCAATCCAGGTAGCGTTACTGTGCAATGATGAAATTCACAGTATCAAATGGCAACAGAACCATTCGTTGGAG  
ATGAGTAGCAAGAATCGCTGTTTAGGAAGTGTGTTTTTCTTCTGTTTTTGTAGACCAGCTGAGTAGTGTGCTATGCTAC  
TGCTGGTGTGCCAAAGTAGCTGGGAGCCTGGTCTCCATGTAAATAAGTTGTAATTTGTTTGTCTTGTGCTGCTTTTTTTTT  
CATCGTCTAATAAAAAATCCGGCAAGCTTTTACCGCCTTTCTAAAAAACTACTACATGAGTACATGACACTGCTGACATACG  
TACCCGTTATGGCCTCATCACTGCAAGAACTCGTACTGAACTTCGCCCAAGTTTGTGTGGGAGTCACTTTGTGTTTT  
CAAAAAATATAAGAAAATGCATCTCTTTGACATTTATCTATATTGAGAAGACTTGGACTGGAACACCGAAGGTGTAATCTCCA  
ATAGATAACAGGATTGGAATGTTAGTGCTCTGAGCTCTGACCGTACTTACCAGCGACTTTTTTAGTGCTCTAATAATTCTAC  
TGTAACCTTTGTGTGGTTGGCTTTCCTGATTTTTTTTATTGTCAGCGTTATGTAATTTGCGTCATCAACTAGCACAAAGTTTCTTC  
TTCTTTCCATTGAGATCTTAGATATATACAACAACCGAAGCTGCCAGTTTCATCAACAAGCATCTCTGCAGCAGGTGAGTT  
TCATGAGAGATC

>SsLRR-RLK407

GGTTTACGCGGCGGCGAGCTGCTGTGTGGCGAGGTGGATGAACAAGAAGAGAAATGAAGTGGACACCGTGAATTTGTGTT  
GCAAAGCGCAACGTTTTCTGATGCATATATTTGATATAAATAGGGGAAACAACTGATCATGCCGCTCATGGCGCGCACGACG  
CGAGAGAGGTGCGCGTCCATCCCCACGCACGCACGACGTCCGGCCATGGCTGCATGTCTGACTATGTCTAACTACCTCTAAT  
CCTGGCGCACAAATCACCACAAGTCGGTGTCTGTGCGCATGCATAAAGGAGTGAACGAAAACATGCTTACTATCTATAGCACA

TAGGAGTATTCAACAAAGATGAACCTTGTTGGCGGAGGTGCCGACAAGGAAGGCCGTCGGACAGCCGAAGAGGCGCAGCCG  
CGACACGGGCCCCGTACGTGGCCACACACCGCCGGAGCCAGTCATCGGCCGTTGTTGGCCCCGAGGGCGCGGACCAGGCTCA  
CGCTCTCGCGGATGAAAAGCGACACCGAATGAGCCCGGAGGTCGTTTCAGATTCTGTTTGGCCGCCGCGCTGG  
CAGAGAGGAGACGGAACAGTACGGGGACCGATGCTACAACCGCGAGGATAACGGCAACTGCAGCCGCCAATGTCGCCGGA  
GCAGCATCCATTGCTTCCGATCAAGAGCTTGCACCTTTCAGTAGTACTTCTTGTAGGTTCTTATCCACATTTCTTTTCGAGG  
TGATGCCTTGTGGTTGGAAGGTGGATGCCATTGCAGTAGGGACAAAATGATTAGTCATTAGTCAGCATATGATGACAACATAA  
AGATAAAACAAGAACAGATGATGAAAAAGACAGATAGGATAGGGAATGGTATATTGGTAATCTCTATATAGGCATAGCCCGC  
TAGAAAAACAACCTAATGTTCTTCTACCTAGGGGTGTTGCCTGTTGGGACTTGAACGCCAAGATAAAATTTTCTCAGTATTATA  
CATTGGTGCCATTTTTTTTTTAAAAAAGAAGTGAAGTTTTCAACGGAAACAAAATTTTTCTGTATTCTTGCATTTGCAAGA  
GGCTCCAGAAGAATAGACAGACTAACAGGGGGTTGGGGGAAACTGCCACATGACTTTGAATTTACAAACAACCTTGTGAG  
ATGGTGTGTCCCTGTCTATGTTATGATGAATAATTGATAAGATGGTATGAGCCTTTTGGTTGTGTTCAATTGAGATTGACAATG  
GTGGACTAATCAGAGATGTTGAGTTGATGAGTGTGTTGTGTGGAGGAAATGTATCTTCTGGTTTGTGATGTGTAGATATTGGA  
TGGCATATGGTGGCTAACCGCTGAGTGATTAAGGTCAAGCAAGTTTACGCTCGATAATCCAAAGGCCAGTGAAGAACGAACA  
AGGAGGTTTAGGACAGATCAACCAAGGAGTTAGTGTGTAGGCCATAGGCGATCCGCATCATCCTCAACTAAATTTATGGAGA  
CAACATCGACTAAGTCAAGGTGGGCATCAAGGTCCACGAAAACATTTAGAGTAGTTCATCATCACTACTACATGAGTACATG  
ACACTGCTAACATACGTACCCCGATATGGCCTCATCACTGCAAGAACTCGCTACTGAACTTCCGCCCAAGTTTGTGTGGGA  
GTCCGCTCGGGCTGTCTCCAAAATATAAGAAAATGCATCTCTTCATGACATTATCCTATATTGAGAAGATTTGGAGTGAACAC  
CGAAGGTGTAATCTCCAATAGATAACAGGATTGGAATGTTAGTGGCTCTGAGCTCTGACCGTACTTACCCAGCGACTTTTTT  
AGTGTCTATAATTTCTACTGTAACCTTTGTGTGGTTGGCTTTCCTGATTTTTTTTATTGTCAGCGTTATGTAATTTGCGTATCA  
ACTAGCACAAGTTTTCTTCTTCTTCTTCCATTGAAATCTTTAGATATATAACAACCGAACTGCTCCAGTTTCATCAATAAG  
CATCTCTGCAGCAGGTGAGTTTCA

>SsLRR-RLK419

ATTTCTGCATTTGACATCTACATTTAAGGTCAATTTGTCTCCTAAATTTATTTTCAAAGTTTCAAATTAAGAGTTTTTATCTTTT  
AAAGAAAGAAACATGCTATTTGATGTATAAAAAATCACATAAATTTGGAATGATTAAAAAATATATAAATTTTTTGAATTT  
TTAAATTATATAAACCTATTTTTATCTAAATAGATTTGATTTTTTAAAAAACAACCTGTAAGAGCGGCTGATAAACTCAACCG  
CCCTTACTGAGCCACGGGCCAAATATAAGGAGGGGGTGCCCGAGCGGCTAAGTCATTGGGCGAAATCAACACATTTGGCGC  
CGTCAGGCTACCAAATCTGGCGCCGCTCTCCTTCCCTCCGACGCGGCTCTCCACCTCCGAGCGCTCTCTCCCTCC  
TGGCCCTCTCGCGCGCTCCACCTCACTGACCTTCCGCTGCCACCTCTCCCTCTCCGACCTCGCGCCACCGCC  
CCGTCTCCCGCACGTGCCGCGCGCGCTGGTTAGGGTTTGTAGCCGACGGAGGACCGCGCGGACCGTGAAGGACACCACGC  
AGGGGTGCCGCGGTGAGGGTCAACGAACTCGACGCCCGCAAGTGTCTGTGGCGACCTCCCGCGCGCGCCCCAACCCGCTT  
GTCCGCTCGGGCTGTCTCCCGCCACCGACATTTCTCTCTCATGACGCGTTGTGCTGCAGCAGATCCCTCGCGCAACAC  
ACCGCGCGCCCGCCCTCTCTCTCCCGCACCACTAGGGTTTGTAGCTTCCCTCTCCCTCTCTCCATCCCGTCTTGTGCTTG  
CAGTGTCTTGTGATGATGTTCAATGAAGTTATGGGATGAATTTTGTTCATGATGAGCTTCAACCCGCCACTGCCTATGATGCCT  
TAACCCAAATCTAAGTACATGCTAATGCCACTACCTATGATGCATAAACCCAAATCTGAGCACATGTCATGCTGCCTTTATTGG  
AATCTTTGATTTAAGTCTGAGTACATAAATGAGATGAATTTGGGATGATAATTTGCTCATGTGTTTGTCTAACCTATCAGTTT  
GATCTATGCGTTCTCCAAGCGTGTCTTTTGGGGCTGTCTTGGTTCTGTTTATAGTGTCTGATCCTCCAGGTTCTCTGAA  
TCTGTGTTGTGAGATCTTGTCTGTGATTGTGACCATAGCTGGAATGATATGCGCTGATTTCTGGCTGCGATTAGTTTTGAA  
GGTGTCTATAGTCTCGGTAGAAAGCTTCAATATGAAGCGAATTTCTCTATCTCTGCTGCCATGACATTTGTGATCAATCTG  
TTAGTACAAGCTTTGGTCTCGTACGCTCTGCAGTACACGGAATAAACCTTTTTTACAATGTTTAATCCTTGTTTATGAGCGTA  
AGCAATAATTTGGAGTTTGGTCACTAAGTGTTTGAGTAGTAGCGATCATGATGATTTTCTGTTAATTGATGTCATCATATGC  
TGCCAGAGACTACGACATACACGCAATATCAGCAAATGACATCAAGTAGGGGCCACCCGTAATGCCAATGCGACAAC  
AAGGCCACTTGCATTTGTACGGAAAGTACTTAGCAATGCAATTTCTTATCTTTTGTCTATGTTCAAAATGCCATTGATATATA  
GGGAAGTTATGTTGTTTTTCCATTACACAATCTCGCACAGCTAAATGGTATACATGACAGCCAATGGCATAGGTAATGTAA  
CTGACAAATGCTACTTTTCTTTTTTTCAGCTTTGAAATCCTAAAAATGAGAATGTAAATCTTCTANNNNNNNNNNNNNNNN  
NNNNNNNNNNNNNNNNNNNNNNNNNNNNNNNNNNNNNNNNNNNNNNNNNNNNNNNNNNNNNNNNNNNNNNNNNNNNNN  
NNNNNNNACAATCTTGTGCTCTTAATGCAGCAACAACAGCTTTACAGGACCATTGCATCTTCTATCTGCATCAACGCCCAT  
CACTTGCCATG

>SsLRR-RLK236

TGAAACTAATTATAACCTGATCAGGTTTCATAAGTTGTGGTCCAAAAAATCTAAGCATAGAGAATGAAAGGTGTTTGACAATCC  
TGACTATTTAACAATCCTAAGTGTAAGAAAGACTTTTATGCCCTTCTTCTCTCTCAGATCCCCACCTGTTTCCTTCGGCCGCCG  
CGTCGAGCTGCTCGCGATCACACGCGCGCGTCATGGTTGACTCGTGCCCCACCACGCGCTGCTCCGCGGCTGCCTCGC  
GGGGGTTGAGAGTCCCTGACCACCCCGCTGTCTGTGACTGCTCGCAGGAGAGGGAGGGAGGGCGGTGTGCTGCACCGGG  
GAGAAGGAGGTGCGTCTGTTGGAGACTTGGAAACGGCAACAGAGAGGAAGAGGGGAGGGAGGGAGGTCCGATCGCCGCT  
GCGGGAGGCGGAGGAGCGGTCCGACGTGCGAGGGCTAACGGATGGAATCGGCCCGCGGTGGCCGAAACGTGAGGGGTC  
CCTCGCGGTACAGAGATCGCGAGACGTAGTTCAAAGCGCGATTTTTTCCACTGCTGCGATCAGAACATGGAGAAATAATCG  
GGCTTTAGGTGGGATTTCTCGATTGTTTGGTCCAGAATGATTATAAATCGAAAAACAACCCGCGCGGCTGACG  
GGCTGCGGCCGGATGCTCAGCAGTGAACCGAGGCGTCGCCGCTCCGCCAGGAGTTGTGGGCTTGTGGCCTCATGGGA  
GCCCCAGAGAGAAGAGGGACCGTTTGACCTGACGCGCCAGAACGTAGCTCATCTTTTTTTTTTGAAAGATAGCCAGGT  
TGACCTCAACAGGATTGCCGTTGTCAGCTTCTTTCTTTTTTCTCCCGGTTTCATATAAATCAATCCTTTGATTTTTTTTGA  
AAATTCATTGCATAGAAAACCTCCACAATAATTTGAGAGACCATTTCCCTTTGTTTTCAGAGGGATAAAATCTTCTCATATGACTTG  
ATGCCCTTCAAATGTTCTTAGTAGGGGATTATCATTATTAGGGTCAATTTTAATTTTGCAGAAGTCACTTTCTGTTTGGTTC  
AGCAACGCTAGTTGCCAAGTAAAGAAATGATGCACAGATAAACACAAGAAATTTTGCAGAAGAAATCAGCCAGTGGCACCG  
AACTACAGACGCCAAGTCAGAAAAATATAGATAGAAAAAGTACAACATCAACTGCACCACAGCTCCCAACAAAAACCGTCT  
ACAATATACAAAAACATAGCCGCCAAAAAACAATCCATGCAATATTTTCTGTTTCAGAGCTGTTGTCCCGCTGTGAACACC  
GGCTGGGTTCATTGACTCACTTCTACACCTAGCAACAGGTGCTGCTCCAAAGCCTACCGCAAACCACTAGTTGCAGCAGAAT  
GCAGAATTGAATTTGCAAAGGCATACATCAGCCACAGCTACTTGGATGATGACAACAGGTAGAGAAAAAGTAAACGCCTT  
GGGTCAAGAGAAGAAGCAAGAGCACTCAGCGATAAATCTCCGTAATCTGCAATCTTCGTCTGCTCAACTTGCCTGTCTGCG  
CCACGTCGATCATGACATGGATGGACGCTGCTTTGAATCAGTCACCCCAAGAACACGGTAGGATCTCATTAAGAGAACAGA  
AGGATAAGCAGCCCAAAAGGCATGAGCACCTGCTTTGAATGCATGCTTTACATGATGCTCATGGATTACACCTTGACGTTG  
CTGATTGAGGGAATTTGTTTGGCCGAAATCATGCTGTTCCTGAACTAATCATGGATGACTGTTCCACTTACTTCTGTT  
TCACGCATGGAAGCCAGGCAACTCAGACACGACACCATGGTGAGAACTCACAAAACGCTGTAGCAACTAGTCTTTGACTAG  
TATTTTCTTTTGGTGACTTGACAACGACCTGGCTGAGAGAATCAAACAAAACGTGAACAGCACCTGCTGTGTTGTCTCTCA  
ACCTCATGCCATCTTCCATCAGACGCAAAAAAT

>SsLRR-RLK212

AATCGGCCCGCGGTGGCCAAAACGTGAGGGATCCCTCGCGGTACAGAGATCGCGAGACGTACTCCCTCCATTCCAAATTATA  
AGACATTCCAAACATCTTGGAGAGTCAAAACATCTTAAGTTTGACCAAAATTTATAGAGAAAATTTAAAAATTTATAACATCA  
AATAGGTATACTAATGAAATATAATTAAGAAAAATCTAATAATGACTTAATATTGTCTATAAATATTATCTTATCTATCTAAAT  
TGGTCAAACTTGATATCCTTTGACTCTCTAAAATCTTGTGAATGCCTTATAATTTGGGATGGAGGAAGTAGTTCAAAGGGCGA  
TTTTTCCCACTGCTGCGATCAGAACAAATGGAGAAATAATCGCGCGGTTAGGTGGGATTCTCGATTGTTTTTGGTCCAGAATCT  
GATTATAAATCGAAAAACAACCCGCCCTTGCCGTTGACGCGGCTGCGGCCGGATGCTCAGCAGTGAAACCGAGGCGTCCG

GGCTCCGGCCAGGAGTTGTGGGCTTGTGGCCTCATGGGAGCCCCGAGAGAGAAGAGGGACCGTTTGCACCTGACGGCCCCAG  
AACGTAGTCACTCTTTTTTTTTTTGAAAGATAGCCCCAGGTTGACCTCAACAGGATTGCCGTTGTCAGCTTCTTTCTTTTTTCT  
CCCCGGTTTTCATATAAAATCAATTCTTTGATTTTTTTTTGAAAATTCATTGCATAGAAAACTCCACAATAATTTGAGAGACC  
ATTCCCTTTGTTCAGAGGGATAAAATCTTTTCATATGACTTGTATGCCTTTCAAAATGTTCTTAGTAGGGGATTACCGCTATTTA  
GGGTCATAGTTAATTTTGCAGAAAGTCACTTTCTGATAGGTTACAGCAACACTTGTTCGCCAAGTAAAGAAAATGATGCACAGAT  
AAACAACAGAATTTTGCAGAGAATATCAGCCAGTGGCACCAGTACGACAGCCAAGTCAGAAAAATATAGATAGAAAAG  
TACAACATCAATTGCACCACAGCTCCCAAACAAAACCGCTCTACAATATACAAAAACATAGCCGCCAAAAAACAAATCCATG  
CAATATTTTCTGTTTCAGAGCTGTTGTCCCGCTCTGAAACACCGGCTGGGTTCAATTGACTCACTTCTACACCTAGCAACAGGTC  
GTCGTCAAAGCCTACCGCAAACCACTAGTTGCGAGCAGAAATGCAGAAATTGAATTTGCAAAGGCATACATCAGCCACAGCTA  
CTCTTGGATGATGACAAAAGGTAGAGAAAAGTAAACGCCTTGGGTCAAGAAGAAGCAAGAGCACTCAGCGACAATTCTCTC  
CGTAAATCTGCAATCTTCGTCTGCTCAACTTGCCTACTGCGACCCACGTCGATCATGACATGGATGGACGCCTGCTTTGAATC  
AGTCACCCCAAGAACACGGTAGGATCTCATTAAGAGAACAGAAGGATAAGCAGCCAAAAAGCATGAGCACCCTGCTTTGA  
ATGCACTGCTTTACATGATGCTCATGGATTCACTTGCAGTTGCTGATTGAGGGAATTCGTTGTTGCCCGAAATCATGTAT  
GTTCTGAACTAATCATGGATGACTGTTCCACTTACTTTCTGTTTACGCGATGGAAGCCAGGCACTCAGACACGACACCAT  
GGTGTGAACCTACAAAACGCTGTAGCAAGTAGTCCTTGACTAGCATCTTCTTTTGGTGACTTGACAACGACCTGGCTGAGA  
GGATCAAAACAAAAGTGAATAGCAGCTGCTCTGTTTGTCTCAACAGTCATGCTTTTTCTCCATCAGACACAAAAATGGAC  
CTATGGCTTCTCAGCGCACAGCTTATGCCTCTTCTCCTATCTGCTATCTTGGGAGCGAGAAAGCATGCTGCTGCCCTCCAATT  
TCACCGAACAAATACAGCAGCAGATTTCACCAATTTCCCTTGCCCTCGCTATTGTTCTGCTCCTCTTCTTGGCCTCTCCTGC  
AAGCTCTTGACCCGAGCAG  
>SsLRR-RLK259

CCCCCTCTAGCCATCTAGGACCTTACACACTGCCATCTTCTCTAACTCCGGTGAGACTCCCCCGCCCTAACCTGACTCGGCC  
ATCGCTACCACCCAGGGCTTAAACCGTTCCGTCACCATCCCCACCGTCTGTCTTAGTAGCCCTTCTATAGCCGCCGAGTTG  
GAGAAGAAAGAGAGAGAAAGGCTCGTTTGAACCTTAGCCCATCGCCATCATCTACTCCTCTTCATCTTTGGTGGCCACAGAT  
CCAGAGGAGGAGCTGCGTACCTAGTTGGCGCTGGCACCATCGGAACCTTAGCTGCCACGCCGGAGCTGGTGAAGAAGA  
TGACGGACGCAGTCACGGACACACGCCGGCGCAAGTCGAGCACGGGCAAAAATCATAGTCGTAGAAGGGAGCAAAACACT  
CGGTTGTTGTTTAAACAATTCTGATTAGGAATCGCGCGAACCAGCAGAGAGCAGACGGAGGGGATAAGTGGACCAGAACGAGA  
AGGGGCACTTGTTTCTTACACTCACCGGCTGTACGACCATATGATTGTTGGGTAACAATTCCTTTTTTAAAAAAAATTC  
ATTTGCTCAAGATGAAGCAGATAATTTGATAGACCAATTCCTTGGTTAAGAGGGATAAAAATCTTTTCACTGACTGACGTC  
TTTTAAAATGTTCTTAGTAGGGGTTTATCAATATTCAGGGTAATAGTTAATTTTGCAGAAAGTCACTTTCTGATTGGTTCAACA  
AAACTAGTTGCGAGTGCCAAATACAGAAATGACGCGATAGATGAATAACAGAAATTTTGCAGAAAAATACACGCCACGGCACC  
GAACCTACGACAGCGAAGTCAAAAAATATAGATAGATAAAAGTACAACATCAATTGCAACCAAGCTTCCCAACAAAACCGTC  
TACAACATACAAAAACATAGCCGCCAAAAGACAAATCCATGCAATATTTTCTGTTTCAGAGCCGTTGTCCAGTCAGAAACAC  
CGGTTGGGTTCAATTGACTCACTTCTACACCTAGCAACAGGTCGTCGTCGGAAGCCACCAGCAAGCCACTAGTTGCGAGCAAA  
ATGCGAATTTGAATTTGCAAAGGCATACATCAGCCACAGTACTCATGGACGATGCCAACAGCTCCTGTAGAAAGTAAACGCG  
CTCGGTTCAAGATGAAGCAAGAGCACTCAGCGACAAATCTTCCATAAATCTGCAATCTTCGTGTGACGTGTGCTACTTGTCT  
CTGTGCGACCCAGTCGATCATGACATGGATACCTGCTTTGAACCAGTCACCCCAAGAACACGGTAGGATCTCATTAAGGGC  
CGGTTTAGATTTAAATTTTTTGCAAAATGGCACTGTAGCAAGTTTCGTTGTTATTTGGCAATTAGTGTCCAATCATGGTCTTAA  
TTAGGCTTAAAGATTCGTCCTCGTCCATTTCTGCTAACTGTGTAATAGTTTATTTTATCTATATTAATCTCTACTGATG  
TGTCCAAAGATTTCGATGTGACGGAAAATCTGAAAAATTTTGCAAAATTTTAAAGGAACATAAACAGGGCCTAAGAGAACAGA  
AGGATAAGCAGCCCAAAAAGCATGAGCACCCCTGCTTTGAATGCATGCTTTACATGATGCTCATGGATTCTACCTTGCAAGTTG  
CAGATTGAGGGAATCTCGTTGTTGCCCTTCCTGAACTAATCATGGATAACTGTTCCAATTGATGACTGTTCCAATTACTGTATT  
CCTGTTTCCAGCATGGAAGCAGGCAACTCAGACACGCCATCATGGTGTGAACCTCAGAAAAACGCTGTACCCACTAGCTGCTT  
GACCAGTATTTCTTTTGGTGACTTGACAACGACCTGGCTGAGAGAATCAAAACAAAACGTTGAACAGCACCTGCTCTGTTTGT  
TCCTCAACCCCTCATGCCAATCTCCATCAGACGCAAAAATGGACCTATGGCTTCTCAGCGCACAGCTTATGCCTCTTCTCCT  
ATGTTTCATATCTGGGGGCGAGAAAG

>SsLRR-RLK223  
TTATATTTGACTAAATTTTGTCTTAACTATAGTATGTTTTTATAATAACCAAGAGGGAGGAGAAGAGCTATTACGGCTAGTAA  
ACATCACAAACCATTGATGAATCTATCTAGCAGAATATAGAACCGAACGTCACCAGTATTTGCGTGTAAACATACAAATGA  
ATTGGCCATGGCAACGAGCTTTTACAATACAAAGAAAAACGCAAAAAAGGGTGATTTATGTGTCAGAGACACAAGCTGGCC  
CTGCAATCACCTGCTCCATTCCAATTTATAAGGCATTTTAAAGAATCTTGGAGAGTCAAAAGCATCTTAAGTTTGACCAAAATTA  
TAGAAAAAATTACAAAAATTTATAACATCAAAATAGGTATACTATGAAAATATAATTAATGAAGAATCTGATAATATTTAATTGG  
TGTCAATAATATTTATTTATCATATAAAATTTAGTCAAACTTAAGATACTTTGACTCTCTAAGATTTTAAAAATATCTTATAAT  
TGAGACGGGAAGATAAGTAACTAGTAAATCCGACATTTCTAGTCCGAGATAACTTAGTAAATCCGTTATAGTCAATTTACTAG  
TCCGAGATAACTTCATCGTTCTCGTGCAACCAAGTCGCTTTCCATAGTCCGCAGCAAAACCGCAGGTGTCGTATACAATGTA  
ATTTCCAAACGTTTACGTCAAACCATAGCTAACCTTGGTGACGACTGACGACAACGGCTACAAAGTAAACGCCTCAGGTCA  
AGAAGCAAGAGAGTACGCGACATTTCTCCGATCATGCTCAACCTTCTTGCACTCCACCTGCCAGTGTCCAGCCAGC  
ATCAATGACTGCTTTGAATCATAATGCATGTCCGTTCTTATATAAATCTTGATGGATGATTTCATCATCTCACCATCATGCTCCT  
TCTTGGCAAAATCATGATGTTCTTGGTCGGAAGGGGGTGCGCCCTTGTCTCAAATCTGTATGCAACAACAAAAACCAAAAC  
AGGTTTTGTATGGTGAACAGGTAAGACCATAAGAGAAATGATGTCAAATGAAACAGAATAATACGTGATGTTAATTGTAA  
CAGTTTTCAAGAGGAATAAGTATGATGATTAGTACCAAGTATCATACTGTTCTGGGAAGGAGTTTCTCAGACGTAACGTG  
GCAATAGTACCCCAAGAGCGATGAACCCACATGTCAGCAACAATGACAGGTGCAGTTATGTTTGTATGATCTATTCTGCAAG  
AAAGTCAAGCATATCAATCTCAGATGAAGCGTCATGTTGTGAACCTGAGAAAAACCTGTCAATGTAGCAGATAACCCCTCGACC  
CAGATTTTTCTTTTGGTGACTGCTTGTCTGAAAGACAACAGCTTGTCTCATGCTCTATCTTGATCAGACTCCTTTGGCCCT  
ATAGCCTCTCAGGACACAATTTATGCCTCTGCCTGCTTCCATGCTGATTTCGGGAGAAAAACACATGCAGGAACCTCCACATCTC  
ACCATGAAGTGCTGCAACACTTTCCCCGCATCTTCTTGGCTTTGCTCTTGTCTGCTCCTCTTGTGGCCTCTCACACAAG  
TTCTTGCCTGAGCAAGAGAGCAACTCACTCTACAGTTCCTTGGTGGGCTTTCACTGGACAACAACCTCACTCTGTCATGG  
AAGAACGGCAGACTGCTGCACATGGGAAGGGATCACTTGCAGTCCAGAGAGGGAAGGTCACTGATGCTCTTCTTGGCTTCTAG  
GAGCCTTCAGGATCCATCTCACCTTCTTGGTAATCTCAGTAGCTTGTGCGCCTCAACTTATCATACAATTGGCTGTCTGG  
TAGCCTACCACTGGAATTTGGTGTCTCCAGGAGCATCATCATCTTGATGTGAGCTTCAATCAACTCAGCGGAAACCTCCAG  
GAACTGCCATTTCAACCCCTGTCCGGCCTATCAAGGTACTGAACATCTCAAGCAACTTATTTACAGGGCTGTTCCATCCAC  
CACTTGGGAGTCG

>SsLRR-RLK224  
CATCATCAATGAGTATGAAATTTTTACTACAGTTGAAGCATATAATAATTAGCCCACTACAAAAATTTTACGATAATTGGACC  
ATAGAAACTGTGACTATAAATTAATTATAGAAAAGCTTAGATCTAAAGCTACAGCAAAAAAATGTACTAAAGCATACCATAT  
TATATGTTCACTGTATAGATCTACTCATGTGGAGTCTGACAAAATTAGATTTTCTATTTTATGATTTTTCTGTGATTACTATGAT  
TTTTCAAAGATTTCAGCCGAAATAAAAAAGGACAAAAACCGCTTTGAAAAACCGCTTATAATTGGTCAAGGAGGTAAACCGA  
ACCTTTTTAAAAATTCAGGGAGGTGGTTTTACCCATTTTTCAGGTTTCAGGGAGGAAAAAGCAGACTTTTTCAGAGATTTGAGGG  
AGGTAATGTGGACTTTTCGAGCTGTTTCGGTTGATGGTTTCTGCAGTTGATAAGACGGCTGAAGCTGATTTGTTGTGAGAGAAA  
AATACTGGGCGGATAAGTTTAAAGCCAACAGGGCGTTTTCTCTTTTTTAAATTAAGGAAGTCCAACCTCCTCGGTGAGGAAAG  
GACAATATTTGAATTTTTTAGCAATCTCCATCCTTTATTTTAGGGGAAAAATATATCTCAAAATAAACTGATATCAGCATGAA

ATTAGTATACTGTTTAGCCACCTCTAATTATGGATTTTGTACAGTATAAATATACACTCTTTTACTCTGAAGTCTAAATTGGTC  
ATGTCTGTTTTACCAGTAAAGAATTGCATTACATGTAATTACAATTTTATCTATGATAGTTCACAGAACAAACAAAAAGTGTG  
ATTATTGTCAACAAATATTAGGTTCAAATGGAAACCACGAAGGGAGGCCAAATCCTTTTCGACCTGGCAGCTGCACCTTTAGTAG  
AAAGAGCTGTTGACATCACAAACCATTGTGTCAGACTGCCCAAACCATTCTAGCAAAAGCAGCCCCAGTGAAGATTTGGAG  
TGAAAAATGAAGTTTATTAGGCCAACATAATTGCTACTAACTCACAAATCATTGCCACAAAGAAAGGTGCTTTATTACAAAAA  
AGATAGGGAAAAAATTGTATGCGGTATTTTTCTGAGATATTTACTGAGTCTGAAACACAAGCGGGCCGGCTGAAATCAC  
CAGCTGAGCCTGACACACATTTGCAACCAGGTCGTTGTCCACTGTCCACGAAACCCACCGGTGCCGGCAAGATAGGAAAAA  
AATGTCCCGAGATATTTTACTGAGTCCGAAACACAAGCCGGCTGAAATCACCAGCTAAGCTTGACACATTTGCACCAGGTC  
GTTGTCCACTGTCCACCAGAAACCCCGGTGCCGTACAATGGAAAAATTGCAATTGTCAAACGCGTAGGACAGCCACAGC  
TAGCTAGGCTTGATTATGACGACAGCCAGAAAGTAAACGATTCTTGGGTGAGCAATTAATCTGAAAAAATCTTCTTGCCCTT  
CTGCAGCCATGTTCTATACCCCATCAATGGATGCTTTGAATTATAGTGTGCAATTGTCTTCCAAGGGGTGTGCTCTTTCATT  
CAAGATTTTGTCTGAGGTTTGTATAATGAACTGATAGGAGAAGTGATCCCAAACAAAGTAAATCAGGAGATGTTGTAGCA  
TTTTTAAAGTAATCAATCATATATGGTTGTGCCTATAGCAGCCGGTGCTTGACCAGATTTTTCTTGTTGAATACGACCAGGA  
GTTAAGGTCAAATACACGGGATAAATCAATAATGATGACATCAGCTGCTCTGTTTGTACTTCGTGCTCTTCTTCATCCAAATCT  
CATTAAATGTATAAACTCTCTGGACACAGCATACGCCTATGCTTATGCTTCCGTGCTGATTCTTGAGAAAATGTGGACTCTC  
CATTTCTCATTCATGAAATACAGCAACAGATTTCCACGAGTTTCTTGGCCTTGTTCTCATGCTGCTCCTCTTCTTTCATCT  
CGACAAGT

>SsLRR-RLK225

AGGATCCAAAGTTGAGTTTACTTCACCCAAAGGGTCTAAACGTGATTTTTTTCAAAAATAAGGCCAAATAGTAAAAAATCAC  
GAAAAGGCCATTTCCGCATACGTATGGGCCAGCAGCGGGCCCATGAAAGGCCCATATGCGTTAGGTGCTGGGTTTTTAAAGT  
TAAAAGTCCACATTACCGCCCAACTTTTGGCAAAGTCTGCTTTTCTCCCTAAACTCTAAAACCGGTGAAAGCCACTTCGT  
GAACTTTTAAACCATTTCGCTTTACCTCCTTGACCGATTAAATAAGCGGTTTTTCAAAGGCGGTTTTGTCTTTTCTTTTATT  
TATTTGCACTGAATCTTTGAAAAATCATAGTAAATCATAGAAAAATCATAAAATGGATAATCCAATTTTTTACTCTACATGAG  
TAGATCTACACAGTTCAACAGTAAACATATAATGGTATGCTTTAATAACACCTTTTGTCTATAGTTTATAGATCTTAATAT  
TCATACATCATCCAATGAGTATGAAATTTTTACTACAGTTGAAGCATATAATAATTAGCCACTACAAAAATTTACGATAATTG  
GACCATAGAAACTGTAGCTATAAATTAATTATAGAAAAACATAGATCTAAAGCTACAGCAAAAAAATGTACTAAAGCATACCA  
TATTATATGTTCACTGTATAGATCTACTCATGTGGAGTCTGACAAAATTAGATTTTCTATTTTATGATTTTTCTGTGATTTACTAT  
GATTTTTACACAGTTCAACGCGAAATAAAAAAAGGACCAACCGCTTTGAAAAACCGCTTATAATTGGTCAGGAGTAAAC  
GAACGATTTTAAAAATTCAGGGAGGTGGTTTTACCCATTTTATAGAGTTCAGGGAGGAAAAGCAGACTTTTGCAAAGTTGAG  
GGAGGTAATGTGGACTTTCGAGCTGTTCCGTTGATGGTTTCTGCAGTTGATAAGACGGCTGAAGCTGATTTGTTGTGAGAGA  
AAAATACTGGGCCGATAAGTTCAAGCCAACAGGGCGTTTTTCCTTTTTTAAATTAAGGAAGTCCGACCTCCTCGGTGAGGAA  
AGGACAATATTTGAATTTTTTAGCAATCTCCATCTTTATTTTAGGGGAAAAATATATCTCAAAATAAACTGATATCAGCATG  
AAATTTAGTATACTTGTTTAGCCACCTCTAATTTGGATTTTGTACAGTATAAATATACACTCTTTTACTCTGAAGTCTAAATTGG  
TCATGTCTGTTTTACCAGTAAAGAATTGCATTACATGTAATTACAATTTTATCTATGATAGTTCACAGAACAAACAAAAAGT  
TGATTTATTGTCAACAATATTTAGGTTCAAATGGAAACCAGGAAGGGAGCCAAATCCTTTTCGACCTGGTACTGCACGCTTAGT  
AGAAAGAGCTGTTGACATCACAAACCATTGTGTCAGACTGCCCAAACCATTCTAGCAAAAGCAGCCCCATGAAGATTTGGA  
GTGAAAAATGAAGTTTATTAGGCCAACATAATTGCACTAACTCACAAATCATTGCCACAAAGAAAGGTGCTTTATTACAAAA  
AAGATAGGGGAAAATTTAGTATGCGGTATTTTTTCTGAGATTTTACTGAGTCTGAAACACAAGCCGGCCGCTGAAATCA  
CCAGCTGAGCCTGACACACATTTGCACCAGGTCGTTGTCCACTGTCCACGAAACCCACCGGTGCCGGCAAGATAGGAAAAA  
AAATGTCCCGAGATATTTTACTGAGTCCGAAACACAAGCCGGCTGAAATCACCAGCTAAGCTTGACACATTTGCACCAGGT  
CGTTGTCCACTGTCCACCAGAAACCCACCGGTGCCGTACAATGGAAAAATTGCAATTGTCAAACGCGTAGGACAGCCACAG  
CTAGCTAGGCTTGATTATGACGACAGCCAGAAAGTAAACGATTCTTGGGTGAGCAATTAATCTGAAAAAATCTTCTTGCCC  
TTCTGCAGCC

>SsLRR-RLK260

TGAACATATAATGGTATACTTTAATATATTTTTTGTCTGAACCTTAGATCTATGTTTTTCTATAATTAATTCATACATTATCCAA  
TGAGTATGAAATTTAAACTACAGTTGAAGCATACAATAATTAGCCCGCCACAAAAATTTACAACAATTGGACCATAGAAAC  
TGCAGCTATAAATTAATTATAGAAAAACATAGATCTAAAGCTACAGCAAAAAATTTGTACTAAAGTATACCATATTATATGTTCA  
CTATGTAGATCTACTCATGTGGAGTCCAACAAAATTTGGATTTTCTATTTTATGATTTTTCTGTGATTTACTATGATTTTTCAAAG  
ATTTAGCCGAAATAAAAAAAGACAAAAACCGCTTTGAAAAACCGCTTATAATCGGTACAGGAGGTAAACAGAACCGGTTTTAA  
AAATTCAGGGAGGTGATTTTACCCATTTTATAGAGTTCAGGGAGGAAAAACATACTTTCGTAAGTTGAGGGAGGTAATGTG  
GATTTTCGAGCTGTTGGGTTGATGGTTTCTGCAGTTGATAAGCGCGGTGAAGCTGATTCTGTTGTGAGAGAAAAATACCTGGGC  
TAATAAGTCAAGCCAACAGGATGTTTTCTCTTTTTTAAATTAAGGAAGTCCGACCTCCTCGGTGAGGAAAGGACAAGATT  
TGAATTTTTTAGCAATCTCCATCTTTATTTTAGGGGAAAAATATATCTCAAAATAAACTGATATCAGCATGATTTTGTACTG  
AAATTTAGTATACTTGTTTAGCCACCTCTAATTTTGATTTTGTACAGTATAAATATACACTCTTTTACTCTGAAGTCTAAATTG  
GTCATGTCTGTTTTACCAGTAAAGAATTGCATTACATGTAATTACAATTTTATCTATGATAGTTCACAGAACAAACAAAAAGT  
GTGATTAAGTCTCAACAATATTAGGTTCAAATGGAGGCCAGGAAGGGAGCCAAATCCTTTTCGACCTGGTACTGCACGCTTTA  
GTAGAAAGAGCTGTTGACATCACAAACCATTGTGTCAGACTGCCCAAACCATTCTAGCAAAAGCAGCCCCATGAAGATTT  
GGAGTGAAAATGAAGTTTATTAGGCCAACATAATTGCACTAACTCACAAATCATTGCCACAAAGACAAGGTGTTTTATTAC  
AAAAAGATAGGGAAAAAATTTGTATGCGGTATTTTTCTGAGATATTTACTGAGTCTGAAACACAACCGGGCCGGCTGAA  
ATCACCAGCTGAAAATGACACACATTTGCACCAGGTCGTTGTCCACTGTCCACGAAACCCACCGGTGCCGGCAAGATAGGA  
AAAAATGTATGCCGATTTTTTTTCCCGAGATATTTTACTGAGTCCGAAACACAAGCCGGCCTGAAATCACCAGCTAAGCTT  
GACACATTTGCACCAGGTCGTTGTCCACTGTCCACCAGAAACCCACCGGTGCCGGCACATGGAAAAATTGCAATTGTCAAA  
CGCGTAGGAAAGCCACAGCTAGCTAGGCTTGATTACGACGACAGCCAGAAAGTAAACGATTCTTGGGTGAGCAATTAATCT  
TGAAAAATCTTCTTGCCCTTCTGCAGCCATGTTCTATACCCCATCAATGGATGCTTTGAATTATAGTGTGCAATTTGTCTTCC  
AAGGGGCGTGCTCTTCAATTCAAGATTTTGTCTGAGGTTTGTATAATGAACTGATAAGAGAAGTGATCCCAACAAAGTA  
AATCAGGAGATGTTGTAGCATTTTTTAAAGTAATCAATCATATATGGATGTGCCTATAGCAGCCGGTGCTTGACCAGATTTTT  
CTTGTTGAATCAGACCGAGGAGTTAAGGTCAAATACCGGATAAATCAATAATGATGACATCAGCTGCTCTGTTTGTACTCG  
TGCTCTTCTTCATCCAATCTCATTTAAATGTATAAACTCTCTGGACACAGCATACGCCTATGCTTATGCTTCCGTGCTGATTTCT  
TTGAGAAA

>SsLRR-RLK237

TGTGAAATAATTTTACTCTTCCCCTATATTTTAGGTCATTTTTTGTGTTGTTGTTGTCAGTCAAAATGTAATCTTGTCAATTGTTTGA  
TTATGGAAAAATATTTTATGAATTAATCTTGTGAGTTGTCTTTAATTGTAGTAGTTATTGGTTAGAAATTCATGAAATTTGTCT  
TTTTTTCATCATAATAAACTTACATCTCGACATAGGGAGTATTTAGGTTCAAAAAATAGAGAGGCATGCCCTACTCCAGCCA  
GTTATTTTGAACAAATTTGTCTTAACTATAGTATGTTTTATAATCAACGAAGAGGGAGGAGAAGAGCTATTCAGGCTAGTAA  
ACATCACAAACCATTGATGAATCTATTCTAGCAGAATATAGAACCGAACGTACCCAGTATTTGCGTGTAACATACAAATGAA  
TTGGCCATGGCAACGAGTTTTACAATACAAAGAAAAACGCAAAAAAAGAGAGGGTGATTTATGAGTCAGAGACATA  
AGCTGGCCCTGCAATCACTAGTAAACTAGTAAATCCGTATAGTACATTTCTAGTCCGAGATAACTTATCATCTGCTCGTGCA  
CCAAGTCGCTTTCCATAGTCCACAGCAACTGCAGGTGTCGTATACAATGTAAATTTCCAAACGTTTACGTCATTTTCTTCT  
CGAATATGACAGGAGACTACATATCATTGCATTAAGAGAAGGAGAGTTAGGCCAAAAATAGCCATACACAGCGTACAAATACA  
CACCCACAAACGCTACACCATTGCCCCGTGAACACCGGGCTAAACTTTTACATTTTACATTTGCGCCAAAGATATGTAAGT

TACGACCAGCTAGACCAACTCCCAACTATAGGATGACGGGGGGCTAGAAGCGACCAAGGCGCCAAGATCTTTTGACACGGC  
CAGTATCCAGAATTCAGATTCTCCCGCGGATAGGAATGCTGTGCCACTCGAGGGGAGATCCCATTGAATACCGTATCAT  
TCCTTGCTTTTCCAAAGGGTCCATGCTCTTAAACGACCAAGGTTGTGAAACCATCACGCACACCCCTGCTTAATTGCTCAATT  
GCTTGTGGCCACCATAAGAAGAAATTATTACTGTCCATTTGGGGAGTGACATCCGGAATCCCAAAGAACTCCATAGCTGAT  
GCCAAACTGCGGACAACGTTTACGTCAAACCCACAGCTATCCTTGGGTGACGACTGACGACAACGGGTACAAAGTAAACGC  
CTCGGGTCAAGAAGCAAGAGAGCTCAGCGACATTTCCCTCCATCGATCTGCAACCTTCTTGCAGCTCCACTTGCCAGTGTG  
ACCGCGACATCAATGACTGCTTTGAATCATAATGCATGTCCGTTCTTATATAAATCTTGATGGATGATTTCATCATCTCCACCAT  
CATGCTCCTTCTTGCCAAAATCATGCATGTTCTGTGCGGAAGGGGGTGCGCCCTGTCTCAAATCTGTATGCAACAAAA  
AAACCCAAACAGGTTTTGTATGGTGAAACAGGTAAGACCATAAGAGAAATGATGTCAAATGAAACAGAATAATACGTGATGTT  
AATTGTTAACAGTTTCAAGAGGAATAAGTAATGATGATTAGTACACGAATTATCATACTGTCTCGGGAAGGAGTTCCTCAGAC  
GTAACGTGGCAATAGTCACCCAAGAGCGATGAACCCACATGTGACGAATAATGACAGGTGCAGTTATGTTTGATGATCTATTC  
CTGCAAGAAAGTCAAGCTTATCAATCTCAGATGAAGCATCATGTTGTGAAGTGAAGAAACACTGTCAATGTAGCAGATAACC  
CTCGACCCAGATTTTCTTTGGTGACTGCCTTGCTGAAAGACAACAGCTTGTCTCATGCTCTATCTTGATCAGACTCCTT  
TGCCCTATAGCCTCTCAGGACACAATTATGCCTCTGCCTGCTTCCATGCTGATTTCCGGAGAAAAACACATGCAGGAACCTC  
ACATCTCACCAT

>SsLRR-RLK213

GGAGGCTGTGTGTAGACAGTTGTTCTTTCTAAAGGCTCTCTTGAACACTTTTGCTACTTCCACAGGGCTGAGAGTTAACTTC  
TCCAAATCAATGATGGTCCCAGTTAATGTGTCTGTAAGAAAGCTACAACATCTGGCTGCCACCTTTGGTTGTTCAACTGGTAA  
CCTTCCTTTTACCTACTTGGGATTGCCTCTGGGACTACCAAGCCTAAGGTGGATGACTTCTTGCTCTAGTTTCCAGATGTG  
AGAGAAGACTGGTTAGTACTTCACTCTTCTATCTCAAGCAGGGAGATTACAGATACCAATTCACTCTTCTCATCTCTTCCA  
ACTTTCTATATGTACACCTTTCTTCCATGTCTACTGTTAGAGAAACAAATTGATAAGTTTGAAGAAACATTATTTATGGAGAGGG  
TCTGATGAAAAATAATAGAGTAAATGCCAAGGCTGCTTGGACACTGGTTACAAAAAGCAAAGAGGAGGGTGGATTAGGAGTG  
ATAGATCTCAAAACTCAAAATGAGGCTCTTCTACTAAAAAATTTGCAACAAGTTCTTCAACAGAGCAGACATCCCTTGGGTGC  
ATCTTGTTTGGGAGAAAGCAATTACCACTGGAAATACATTGTGCTTGTCTGCTAAGAAAGGATCCTTTTGGTGAAAGACTCCCT  
GAAGCTTCTGGATAATTTCAAAGGCATGGCCTCAGTTTCACTTATGGATGGTGTCTTCTGTATGCTTTTGGGAAGATGGCTGGC  
AAGGCCAGCCCTTTAAACTGGTTCTTCCAGAGTTATACTCTTTCACCAAGAAGGCCAAAGATCTCCATCAAAGATGCTATTGCA  
GCCAGTTCTTTTACCAGCCTGTTCAATCTTCCCCTTTCTGTTGAGGCTTATGGCCAATTTCACTAATTCAAAATCTTCTTCAG  
AGCTTACAGTTATCTGGTAAATCTGACACCTGGAAATACATTGGGGGAAACTCCACTTTTACCTCCAAGAGACCTTATGTCTA  
TCTCAGGGGTTCAGCCAGTCCCATCCAATTTCAAATGGCTCTGGAAGTCTTCTTGCCAAACATAAGCACAAGGTATTCTTCT  
GGCTGCTCACCAAGATAGGTTGAGTACAAGGAATATTCTGAAAGGAAAAACATGCAATTACCTTCTATAATTGTGTGTTA  
TGTAATCAAAACATTGAGGAGACCGTGGAGCATCTGTTCTTGGATTGCGAATTGGCTAAAGCTTGTGGGGTAAAAATGGCC  
TAACAGTGGATAGTTCCCTTAACCCCTTCAGATTTTTTCAAGAGCTTCAGACTGCAGCTGGGCATTGCTTTTTTCAATGGAAGCA  
ATCATTGTTATGAGCTGGAGCATTTGGACTCTTAGAAATGATGTCATCTTCAGAGGGATTCTTGCAAGTACTCTGCGTGGCGC  
TGAAATTTTCAAGGACATCTTTGGTCTGCTCCTATGGAGGGCCAAGAAGAAATATTTCCCTGCAATCAGTTTCATGGCTAGAGC  
AAGTTGTTTAAATAGCTTTGATTTTCTTTGTTTCTTCTTGTGTTCTTGAACCTCTCCCTTTCCTGGTTTCTTTCATGTTTGA  
CTCCTGTGCAACTGTCTTGGTTGCTGTTTTTAAATAATATTTTCACTAGAGGGCTCCTGAGCCTCTCCTGTTCCCTAAAAAACT  
GCCTTGTCTGAAAGACAACAGCTTGTCTCATGCTCTATCTTGATCAGACTCCTTTGGCCCTATAGCCTCTCAGGACACAAT  
TTATGCCTTGCCTGCTGCTTCCATGCTGATTTCCGGAGAAACACATCAGGAACTCCACATCTCACCATGAAGTGTGCAACA  
CTTTCCCGCATCTTTCTTGGCTTTGCTCTTGTCTGCTCCTTGTGTCCTCTCACACAAGTTCTTGCACTGAGCAAGAG  
AGCAACTCACTCTACAGTTCTTGGTGGGCTTTCACTGGACAACAACCTCACTCTGTCTATGGAAGAACGGCACAGACTGC  
TGCACATGGGAA

>SsLRR-RLK232

GGTGGGAGGCATCTCGCGAGACCGCGTCGACGCGATGGGCACGCGATCGCTCGATGGGTGCACGCGAGCGGACGTGAGCG  
ATCGGGCGATCGGATCACGTCACGATCGGATCGGGCGGGCGAGCGGCTCAGGAGGGAAGGCGCGGAGCGGACGTGAGC  
ATCGGGCGGATCGGATCACGTCGCGATCGGGCTGGGCGACGCGATCAGGAGGAAGGCGCGGCTCGGAGAGACGCGAT  
GGCCGAGGAAAAAAGAAAAAGGTGGTGGCCAGAGAAGGAGAGGAGGCGGCGTCTGAGAGGACAGCGGCGGCGGAGG  
AGGAGCGGCGGACGATCAGCGCGGCTAGGTTTGCAGGAAGCGCGGCCGAGGACGCGAACCGCGTGAGATACCATGAA  
AGCGAGTAGTGAATACGCGATACATTTCTAGAGACAAGCGTTGTGTACATATAGACTCAATGGGGAGCCAGGTACGCGAGG  
CCCATGGGCGGTGACTCGTTTACACTCTAACAAGAGTCAATATAAAATGTGCAATTGCAATTCATACTGTAACCAAGTAAGCAT  
AATCATCAACATAATCTCAACCAATAAAAAATTACTTCCCCTCCGTTTGGGTTTATTTGACATCACCTTTTTTACCTAGCGATTTT  
GACTGTTCTACAGTAGGTCAGTAAATATTGGTGACAGGTAACCAACAGAGGGAAGTACAAAAACAGCGGTGACCCACAG  
ACGGTGAGACAGGTAAACCCAAACGAGGGAAGTAATTTGGTGACAAGTGAACCAACAGAGGCAAGTGCATGCAATG  
ACGAGATTATTGGTATCACCACTGAATAAATTTGATAGGATGTTTCACTTTCACAGCAGCACCTCCATAGGCCACGGCTG  
TTACTTCCAAGGCTTTTGAATTCCTGTGACAAACAGAGCCGTGGCCCGTGGACCAAAGCTCCATCATGCAAGCGCCTCTG  
AACCAGGGCCATGGAAACAGCCATGCACATCACTGAATCAGCAGTAAGGATAACAGAAAAATAAGCAGCCAGTCAGAAGA  
AGAATAGGGCACAGGTCAGTCGCCCTCGCCCTGTCACTTCACTCACCACTCAGTAGCTCAATTGCTTTCTTTCGCTCCA  
CTTGTGCTAAGTCCAAACCATGTACACACCTTGACCGTCAACCTGATGATTGCTCTAAATTGTAGGCTCTTTCGGAATCATG  
CGCTTGTGATACTCTCTACGCCAATCGGGTCTTGACATCATACGAATGTGGCTTTCAGAGATACGAGCCTTTTCTGCTC  
AACAAAAAGGGCACATCGATTAGTGATTCAAATTTATTTATTTTGTCTTAGATTGTTAGCACTAACGAATGAGGTTACCAT  
AATGGTTGTTTAAAGTGAAGCTAGTAGGACAAGTGATGTCACAGGCAGAGCCAAAAATGCGTTTCTTTATGGACC  
AACAATACAAATTTTATCAAAATTTGGTTCAGATTCCAAAAATCTCAGTGGAGCCTATACTCGCCCTGGTCAGATCCTTAGAT  
CAGGCCAATTGAGGGGTATACAAATGTGGCAACATAAATATGTCAAATCAGGTAAAAATGGTAAATCACAGCAGACTGTAG  
AAACTCAACAAAGGATTGATTCAATGATGACTGGACAGAGGCAAAATATTTGTATGGTCAGGAAGCTTCTGATGATGGATTCC  
TAGTGAACCACAGCAGATAGCCACCAATGAAACATCTAGGTGTGAACAAGCGAGCTGCTGTGTCTGTTGCATATAATAGAAT  
CATAATGAAGACTTTGTTGTACCATCTAATGCTTGCCTCTATTTTCTTTGCGGTGGACACTACTAGAAGGGATCAGCAAGAT  
GGAACCAGCAGCTCTTCTTCTTACCTTATGTTCTTCCCCGTTAGACCATTATAACTTAGTCTAGATTGGGCACAAGTTA  
AGTGCTGATTTCCATGCTAGTTTCAATAGGAAGCC

>SsLRR-RLK231

TTTCTATGGCGAACAGTAGTTCGCGTGCTACAGTGTGTTTTCTGCGCGTGCTACAGTGATTCTGGTTGCTACAGTGTTTTCTTC  
CGCTACAGTACTTTTGGCTGTTCTCTGGTTGCTGCTGCGGCTTCTGCTCAGTACGACGTGTGCTCCGGTTACTTTTTGGT  
GCTCAGTACGACGTGTTGGTAAGTTTTACGAGCTGCAGTCCGTTGTGCGGCAGGATGAAAATTTTGAAGGGACTAATAAA  
GACTCGTGTACTCTGAGAGTAGACTTGGCAGAGACGAAATAAATTGGACGTGCTGCACACTCTTCTCTTCTCCTTCATGCTT  
GGTTGAGCAGCTTTGATTACTTGACGTGAAGACCAGCTGAGGAGGCAACATGCAGCAGCTTTGATTGCTCGACGTGGAGAC  
CGGGTGAGGAGGTAGCAAGCAGCAAGCAGTACGTGATGCCAGGCGTGCAAGTGGCCGGTGACTTGTGTCGGA  
GCGTGTCAATCACGAATAATTGATCTTTCCCGCTTTGGTTTGAATAAATTTGTGAATATTCGCACTTGATAATTTTAGTTAGCGA  
ATTCTGTGTGATGAGTTTATATTTATCGTTTTCTGTTTTCTTTCATTTCAGGACTCGAATTGCATTTTCGATTTTATTTCCAGCT  
GTGCACTTTTAACTAAATGCTCATAAATATTTTAACTGATTTTACAACGTAAACCAAGGCTGTTTACAGTACTACT  
GACACATGAGGGACAATTGCAAGGACTACTTGACTGCTGTGCTTGTATGAGTCAACAACCTTAGAATGCTAATAAGAAATTTGT  
GGCATTTAGGTGTGTCGATGATACAATTAGAACATAATTGCACCTCTTAGCCATGCACAAAATTAAGTTTGAAATTTTGTATGT  
ACCAACATCACGTTCCGAAAATGTTTTTTTAAACATTCATACTATTGTTTTTCAACAATACACCATACGCTCGAAGTTAAAT

TAATTACCATATCATTATTATGTTCCCGTGCAACGCACGGGTATTATCTAGTCTAGTTAAATTTAAGAAAGTTAACTATCATC  
AATAGAGACACCTTTTTTTTTTGGTATAGGTGGGTGGGGGACGGAGGGGGTAAGGTACGCCCCAAATTCGTGCTTCGTTTC  
TTCGCTCCGATGACATGCAGCTCATGTCACTCCTTAATGGCTGTTTAAATCGGCCAAAAACAATTTGTAACCAAGACTAAAAAT  
TAGATATCTAACTGTTAGCCCGTACATGTTTGGATCGGTGCTTACATCTCTAGCAATGAACATTTAGCTCTTGTAGGATAAGTA  
CATTGGTTTTGTCTCATAGGTGGTCTCATGTAGTGTCTATGTAATTTTAAAGACGATTTAATAGACAACATATACATAGTTGTTTT  
TTAACTTGCTTGTAGTAATTCACAATTCCTTAATTTATGCATAGAATAAAAGTAAAGATGTGAGTTGCATGGCAATAACAAC  
CATACAATGGTAGAATAGTTGTTTCATGATCCTAAATTTTACGTACAGAGGTGGTTGTTTCGTAAAAATAACGACCTCGTTCCCT  
CTCTCCTCTCTCTTCTCTACATCAGTAAAAATCCTACGTAGCACTGCACGAGACGGCCAACGAGACCGCTGATGTAGCAA  
TGTACCTGTCTGTAGTTGTGCTTGGCTAATAGACTTTTTTATGTGGCGAGTTATGTATGAGTATGTATCGATCGGTGACGTC  
AAACTGAGAATACGTGGGCTGTTATATACAAGTATATGTAAGTAAAAACACTGCCATAAGGAGGATTTTCTATACCATTTAAACC  
ATCGAATTCATCATTCTTTGCGGTAACTACGACCAGGAACGTAAGTGGTAGCCAGGATGAAAGCACGCTCTCTTTTCTCTTCTA  
CCTCGTGCTCATCTTATAGACCATTCATTTGGCTCTTCATCTAAACAGAGCACAGGCTAAGCTCGTTTAAACAGGAAGCC  
>SsLRR-RLK255

TTACTTTTGATCTGATCAGCTGTATCCTAGTTGCTAACTTCAAATATCTAATAACTTCTAGGAATAATGCATGTTACTGTGGCT  
GAGCAATTAATAGCTAAAAACTGATGCATGACATTCAACATCTATCATTGTTGAATTAGTGTGCTTGTAAAGAATTAGCA  
CACACTTGTGGCTTAATATCTAAATTTTTTGTAAAGAGGGAACACTGAAAGAAAAAGCTGTTTGATAATATCCGGGTTCCCTC  
AGTTGATTTTTTTTCAATCTTTCTGCAGCTGCCATTGAGAAAGAGATAGCTAGCCACTAGAACCCCTCGTCAGTTGTTAGGAC  
AGTCCCTGGGCAAGAAGGTTATGCTGAAGCTGCAGTGCCGAAGTTGCAAGCACTACCTGTAGCACCTGATCTAGGTACTGC  
TTATTTTTCTTTGGGCTGAACATGTTAAACCAATCATTCCTTTATCTCTCTAATCTCTCTATCTGTGATTGTCATTTTTCTGTCTC  
GCTGCCACAGTCTAGGGATAGAGTTAGCGCTTGGAAATGCCATTTCCATGCCAATTCGGCTTCAATGCTGCACGCTGATGA  
GGTACTAGGATGCTTATAGAATTTGTCTATTGCCATGACGCCCGAAATTTACTGTGAACATCATCACTGACAAAACCTGCCATTTC  
GTTTTAAACATATGGCATGAAATGCCATGTGTCCTAGTTGCACTGGTGCTCACGTATACAGCTTGACATCATACTGTACCTTG  
CTTAACAGTAAACCCAACTAAGGAGAATGAATTTCTCCACATGTACATGCAGGTACACACTATTGGGAATTACAAATTTCTAT  
GCAAACCTCAGAACTGGCCCGCAAGTGCACCTTGTATTGTTTATATTGTCGATTACTAAATAGCATGAGAAGATTAGTA  
CACAGTGTCAAACTTAATTGTGTTTTCTTTGTGAGCTCTGGGTGTAATTTTGGCAATGCTATTGACAGCATCAGCAGTATTAT  
TGTTTTTGGCCGTTTCAAAAAAATAAAAAAATCCCCAAACAGGAGCGTGCTCGCACCTCCCTCACTCCCTTTCCCTTG  
CGGATACTTACAATTGTTTACAGGATAGACCTAGTTTATAGCCTGGCGGACTAATTTCTGACATCGAGGATTTGCGCCCTGAC  
GTTTCAACACAACTGCAGCCATGGAAGAACTTACCTGCTCTCTCTCTGTTTCTGTTTTCGCTATGCGCATGCGATGATGAGT  
TGCCACCAGAATCATGAATCGGGCGAACCATCGATTCCAGAAAGGCCGCTTTACCCCTCTTGATGTTGAGCTGTGCGTTGA  
GACGACGGATCAGTTCTATTATGCTGAGTTTTCTATGCTAGGATTACAAAAGATCTGGTTGGCAGCTCTTAAATGCAGTTT  
CTGCTATCAATTATCCATAGATTGTTGAGTGTTTTGGTTCTGTTGGATTGAGATGCTGGTGTTGATTGGCCATCTGGGTACC  
GGTAATACAAGGAGTATGAAATTTGGTTTACCAACTTGAGCCTTTTTTTTGTGTTGTGCAATCCAAACAATAATAGAATGGT  
TGTCCAGTTGTTTTATGGGTTCAAAGTTGCATCTCTTATCAAATGAAGCAGGATTAAATATCTGCTCTTTTTTTTTTTTGA  
AGAGTTGGAGTTAACTCTAATACTCTTATTAAGTTGAAGTAAGATTGAACNNNNNNNNNNNNNNNNNNNNNNNNNNNNNNNN  
NNNNNNNNNNNNNNNNNNNNNNNNNNNNNNNNNNNNNNNNNNNNNNNNNNNNNNNNNNNNNNNNNNNNNNNNNNNNNNNN  
GAGAGCTTGCCAAAGTCAATTTCTCAACTTAGAAAAATTAAAAATATTAGACCTTAGGAAGAACAACTTCAGTGCCAAAAT  
TCCAGAAAGCATCTATTATGATGATCAAACTAACTGCGCTGCGTCTATCTTTAATAATTTCCAAGGCCAGTTATCAAAGGGACT  
AGGCAGTCTG  
>SsLRR-RLK254

CTCTGGCAGCTCCCTAATACTATCCCGCATCTCATAAAACTGTCATATTGGAAGAGATGGGACAATTTCTTTTGTCTCCCGTAG  
CTCCCCAAAAGCTCTCCCTTTCTCATCTCCCTCAAATAAAGAGGTAGTTGCATCTCCCCCAATAGTGTGGGACCACAATAA  
CCGTCCTCTTTTTCTCCCTCCCTCACTTCTGGCATGTGGATTCCATGTATTGGAGCATGTTATTGGTGATCTGCTGGAGCATCC  
TCGTCAATATTCAAAAAAAGTAGTATTGATGATCACCATACTATTTTATTAGGGATGAGCTATTGGTGAGCTAATGGAGAT  
ACTGTAAGATGCCATCGATTATAGATTGTAACCTTTCTTGAATTGAGATTGCAAGCAAACTCAATGATGGGCATCATTGC  
GAAGCCTACAACCTACGTGTTCCAGCCTCTATATAGGAAACACTTTTACCAATTTTCGCCATTTCGATGAATAGATGGCTTAC  
TCCAATAAGCTGTTATTAGCAATAAACTATAGTAGTAGTTATACCTTTTATTTTATCGATATGATTAATTATGTTTGGGATACT  
ATGATACTAAAACCTTGCACAGGTACTTATTGTCTTTACCGTAGCGTACTATTTCAAAGAAACATATTGTTTTTTTTTATCGT  
AGCGTTAACACGGCAATATATGAACTTAAATCTCATCTTATCTTAAATACCAAGATATGATTGCCTTTGGCTAGCTTG  
ATTTGATTCTGAGACTCCCGGCACAGACACGTTGAGTCTGTTTCTGCAATATCATCAAGAAAAACAGCAATCTGATAC  
GTACAGTACAGCCGTTTTCACGTACAGTCCGACGTGCGCCACCATCTCCCCAGTATTTACAGCCGTTCTCAGAGTTGGGAC  
GACTTTGAATTGCGAGAAGGTAAGGACTTTCAGACTGATGATGATGAACGGAGCACGTACTACGTGCGTACGCGATGGGTGG  
CGGAACACAAGACGCGCGCGGACGGCTGAGTGGCTGACAGCTGCGAGTGCGAGTGCGACGAGTGTCTACTGGCATGTGCG  
CGTTGCGCGCCCGCGCGCGCGCTGGTTTGGCAGTCTGCGTTGAGGGCGGGGCGCTGACCAGACCGCGTCCATGCGATGC  
CGCTGTTGAGCCTGGACGCGTACGGCACGCTGCGCGCTCCGTCCGATGGCGACCCCGACCCGCTCACTGCCTTGACTTG  
ACTGCTGCCACTGCGTGGTCCGTGGAGTCCAGACTCCAGAGTGCACAAAACAAATGGCCATAGGGCCGCAACGCCTGCTCAG  
CAGATTCTCGGCTACGCGACCCACACGCTGTTCTGTTTCTGCAATATCATCAAGAAAAACAGCAATCTGATAC  
AGATAATAATCATACAACAGCCACTAAGAGCCAGCATGAAATGTACAAATGGGCTCGCTAGTACTGTAACCAATAAACTACTT  
CCCTCCGTTTGTGTTTACTCCACAATCACCTTATTACCATAGCAATTTTACTGAGTTTTTTTACTACATAATCTTTAGGTACTT  
CAGCTTTTGATATTACAAATTTGTCACGAAATACACTTCGTGAGTATTATATTTTGAACATGCGAAATTTCTTTGTAGAAA  
AAATTTGGATGGTAAGAGCTGTACAGTAAATTTTGGTGACAGGTAAACCCAAATATAGGCAAGTACAAAAACACGATGA  
CCACATGCAGGTAAACCCAAACAGACGGAAGTAAATTTGGTGACAGGTAAACCCAAAAAACGGAAGTAAATTTATT  
GGTGACAGGTAAACCCAAACAGAGCACAAGATTATTGGCATCACCACCTGAATGAATAAATTCGATAGTCCACGTTACACT  
TCACAGAAGCACATCCACCATGGCTGTACTTCCCGCGCTTTGAATTCCGGTCATCAACATGAGCCGTGGTCCGAGGACCA  
AAGCTCCATCA  
>SsLRR-RLK253

TTGCGCAAGTCTAGCTAAGAGACCTTACAGGGAACCAACAGGCCAGTTTGCAATTATGTGGCTAGGGGCTAAGCCAGGAA  
ACCAAAACACCTAAATGATGAAACATAATCTAGAAGGAAAAAAGTCTAAAAATAGGCAAGTATGATGGCTCGATCAA  
CTGGCTAGCTGAATACACAGCATGAGCAAAAAATAGGATAAAGTGGTCACGGTTCGATAAATTTATGAGGAAGTTGCTAGAT  
CGGTACAATAACGTTTACATCAAGCGGTTGATACTGAATACTTCTCCGTCTCTCAAAAAATACAATTTACATCTCAGCCAAAC  
TCGAATTCCTTAAATTTGTTTTAAAAAAGTGATATAAACATTTTATTATTAATTATAGATATAAATTAAGCTATGAGCTTTTTTA  
CGGTTCTTTGGGAACTACCGGTTCTTCTTAAAAACTATTGGAGCCGAAAAAGTTGTTTTTACCATTTTTGTCTTCTGTTT  
CATGATTTTATGTAGAGAACAAAGATCCACGTCGATGTTCCATTGAAGAAAAAGCAATAATATTCGTCCACGCGCATGCATG  
CCGTTGCGGTGGCTTCTGCTGCATCTGCCGTGCTTACTCCATCTCCATGCTGGCTGCAGCCTGCAGGAAGCAGAGAGT  
CCGAGCCGACAGCCGACCCACTCTGCTATGCTCCAGCAGGAGTTTCTCTGCGATTGGCTCTGAATCTCTGATAGCGGG  
ATTATGTAACATCGATAGATACGTCTGCGAAAAATAAACAAATAGTGTGTGAATGGAAGGAGCAGACAAGACCCAAAGTGT  
TTCTAGGAAAAAAGACACAGAAAGGGAGCCTTTCAAAAAGAGAGGAAAAAAGACACGGAAGGGACGAGCGC  
TAGCCGCTCTAGCTCTGCTCAGCATTCAGATTACAGAGGCTCTTAAAGCCTCGACAGTGTATTAGTGCCATTCACCTGTCTG  
TTCTGCAGTCGACACCAGAGAAAAATAGTAGCCACCCGTGATGTCAGATAATCATACAACGACCACTAGAAAATGTGCAACTG  
CACCCTAAACCAATCAATCAGTCATCATCAACATGAACATGATCAAGATGCATTGAAAAAACACGAGATCTTGAGTATCA  
CTACCTGAAAAATTTTCGATAGGCCATGTTTCACAGCAGCTTGCTTCAGGCACTCCACTCTCCGGGGCTGCTTCAAATCTGTCT

GCCAGTCTCTCGTGACACGCTGCATGCCAGTTTACTTCCAGCCAGAGCCGAGGTCCATTACGCACCTGTGGAACAGGGGA  
GGGGGAGCATGGGAAACAGCCACGAGCGTGCACATCACCGCATCAGCTGCAAGGATAACATAAAGTAAACGCCTCGGGCC  
GAGGCGGTAAATAGGGCAAAACAGGGAACACACCTTAACTAATCACTCCTTGGTATGCTAAATCCTATTAAACGACTTT  
TAAATTATGTGCCTTTTCTGTTCACCAATAGGGTGTAAGGACATGCGATGCCAGATCCTGAGATAAGGTAAATTCATGCAG  
GCTCTGTGTGACTGTAGAGTGAATCTGTCAAAATAGGTTATGTCAGATCAGGTAAATCATGTACACTGTAATAATTCAACA  
CGGATTGATTCAAGGATGACTGGGAAAAGACAAATAGTTTGTGCGACCAGTAAGCGTGGTCAGTTGGACTTCTTAATTGATC  
ATAGAAGGTAGCCACCAATGAAACGTCAAAGTGCCAACATAACAGCGACCTGCTGTGTCTACTGCATAGATAACAATAGGTA  
TGAGGAAATTGTCATAGCTTCTAATCCTTCACTCCATTTTCTCTCTGCTAACCACACCAAGAAGGGATCAGAAAGATGGAA  
GAGAGGGCTTCTCTCTCTACCTTATGCTCTTCCCTGATTAGACCATTGGTGCTGCCTAGACAGGACACAGGTTACAGCATCT  
GCTTCCATGCTGTATCGAAAAGAAGCC

>SsLRR-RLK209

TCACGAGGCGCGTCTCGGCATTACGATGACTATCACGCATTGAAAAATCATGCATCACGCAAAAATTCGATGCCAGGAGG  
GATCAAACTTGCCTCTTGCCTCAAGCATCAACGCGTTAACCAGAGCAGCTACGAACATTTGTTGAAGGGGGAAACCGG  
CTATCCTATTAAATTAGGGCAAAACAGGGAACACACCTTAACTAATCACTCCTTGGTATGCTAAATCCTATTAAACGACTTT  
ATTTTTAGTATGGAGGGAGTACAATACAAGCAACTTCAGCCTGGACCAGGTTAGGGAACCGTGGGCCTTGATTGGGCTGC  
CCTCTGCCTTTCAATTTCAAAGGCCAAATGGCATGCACCTATTGGTTGCATGGTTTTTCAAAAATTTGTCGTTGTTACCCAGAT  
TTTAATGCTAATAACATCTCCAAAAAGTTTGTCTGTTTACCATTGCACTGCTCTAACTAGAAATTATAAACGATGAGGAA  
GGAAGCAACACCCCAACAAGGGATGGCAGAAACCTCGGCCGGAAGGCATGAACATGGTGAATGTTGATGCATCTTTTGATG  
ATGATGTGGGGTGCAGAAGTACAGGGTAGTAATAGAAATTGTTCAAGGGGAGTGTTGGCTGCTTCACACAGTTTGTGCTCA  
TGTGGTTGATGTGCCAATGACGGAAGCATATGCATTGAAGGAAGGTTTGTCTGCTGGCACAACACATTGGAGTTAATTGGCTC  
ATCATCCAAGCTCCAAGCAGACTGCATGGAAGCTGTAGAGACAATGAAGGAAGGCGGCTTTTGGCGAGCTCGGCGGCACG  
CATCTACGACAACCGCAGCACTATGCGGAGCGGATTTCAAGACATCTCATCTCGATTGAGCATTGTAGCATGTATGTAATCG  
AGTGGCACAGAGTTGGCAAGGCAAGCTATGCAAAATCAAGATAAATTGTATCTGGGACGATGAGCCCACTAGTTTTATTCTTG  
AGTTTGTATTAAATGATGAACCATCCATAATTAATAAAGCTCGCTGGATGCATTTGTCAAAAAAAACATCTCCTTAACCATA  
TATCCAATTTGCAAGTTGTTTTTACCATTTTATTTCTCGTACCGTGATCCCAACGACAGAACAAAGATCCCACGTTTTATATTTT  
TTTACGAACGTGCTTGATTTCATGCACGTGTGCCATGTTTTACAGCGAAGAAAAAGATAATAGCATGTGAATCCTACAGGT  
CATTTTACACAGGCTAGCAAAATTTGGCAGGACAACCTGTCCAAACACTCTTCGACGCTCTACATTTTGGTATTGGCCAAA  
ATTTTGTTCGCTGCAAAACCAAGCATTAAATTTATAGCCTTAATTTTACTAGTCAAAATTTGGCCATAACCAAGATTGACTC  
AACCAGGCACCTCCACGTTTGTCTGGGTGGGTCCCCTCTCCATCCAGGAGTGGGAAGACCGCGTCTCACGCGCAATCGC  
GCATGCCGTTGCCGTGGCTTCTGCATCCTCTGCGGTACGTGCTTCGGCTTCCACTCGATTATGTAACATAGATAGATACGTCT  
GCGAAAAATAAACAACTAGAGTGTGAATGCCAGGAGCAGACAATCAAGATCCAAAGTGTTCTTCTAAGAAAAAGACAC  
AGAAAGGGACGCATTGCTAGCTCTGCTGCGCTCAGCTGGCGGCTCTTAAAGCCTCGACAGTGTTTAGTGCCATCCACTCGCT  
GTTCTGCAGTCGACACCACAAGAAAATAGCAGCCACCCGTGACCGTGATGATAGACAATCATACAAACGACGGGACGACCAC  
TTTGAATGTGCAACTGCACCCACTAACCAAGCAATCTTCATCAACATGAACATGATCAAAATGCCAGAAAGAGAGGGCTTC  
CTCCTCTCTACCTTATGCTCTCCCTAATTAGACCATTGGTGCTGCCTAGACAGGACACAGGTTACAGCATCTGCTTTCCAT  
GCTTGATCGAAAAGAAGCC

>SsLRR-RLK208

GAGGCGCGTCTCGGCATTACGATGACTATCACGCATTGAAAAATCATGCATCACGCAAAAATTCGATGCCAGGAGGGATC  
AAACCTTGCCCTCTTGCTCAAGCATCAACGCGTTAACCAGACTAGCTACGAACATTTGTTGAAGGGGGAAACCGGCTATC  
CTATTTAATTAGGGCAAAACAGGGAACACACCTTAACTAATCACTCCTTGGTATGCTAAATCCTATTAAACGACTTTATTTT  
TTAGTATGGAGGGAGTACAATACAAGCAACTTCAGCCTGGACCCAGGTTAGGGAACCGTGGGCCTTGATTGGGTGCCCTCT  
GCCTTTTCAATTTCAAAGGCCAAATGGCATGCACCTATTGGTTGCATGGTTTTTCAAAAATTTGTCTGTTTACCCAGATTTTA  
ATGCTAATAACATCTCCAAAAAGTTTGTCTGTTTACCATTGCACTCTAACTAGAAATTATAAATAGCTATGAGGAAGGA  
AGCAACACCCCAAGAGGATGGCAGAAACCTCGGCCGGAAGGCATGAACATGGTGAATGTTGATGCATCTTTTGATGATG  
ATGTGGGGTGCAGAACTAGGGTAGTAATAGAAATTTGTCAGGGGAGTGTTGGCTGCTTCACACAGTTTGTGCTCATGT  
GGTTGATGTGCCAATGACGGAAGCATATGCATTGAAGGAAGGTTTGTCTGCTGGCACAACACATTGGAGTTAATTGGCTCATC  
ATCCAAGCTCCAAGCAGACTGCATGGAAGCTGTAGAGACAATGAAGGAAGGCGGCTTTTGGCGAGCTCGGCGGCACCCAT  
CTACGACAACCGCAGCACTATGCGGAGCGGATTTCAAGACATCTCATCTCGATTGAGCATTGTAGCATGTATGTAATCGAGT  
GGCACAAGATTGGCAAGGCAAGCTATGCAAAATCAAGATAAATTTGATCTGGGACGATGAGCCCACTAGTTTATTCTTGAGT  
TTGTATTAAATGATGTAACCATCCATAATTAATAAAGCTCGCTGGATGCATTTGTCAAATAAAAAACATCTCCTTAACCATATAT  
CCAATTTGCAAGTTGTTTTTACCATTTTATTTCTCGTACGCTGATCCCAACGACAGAAAGATCCCAGCTTTTATATTTTTT  
TCACGAACGTGCTTGATTTCATGCACGTGTGCCATGTTTACAGCGAAGAAAAAGATAATAGCATGTAATCCTACAGGTC  
ATTTTACACAGAGTCTAGCAAAATTTGGCAGGACAACCTGTCCAAACACTCTTCGACGCTCTACATTTTGGTATTGGCCAAAAT  
TTTGTTCGCTCGCAAAACCAAGCATTAATTTATAGCCTTAATTTTATCACTAGTCAAATTTGGCCATAACCAAGATTGACTCAA  
CCAGGACCTCCACGTTTGTCTGGGTGGGTCCCCTCTCCATCCAGGAGTGGGAAGACCGCGTCTCCACGCGCAATCGCG  
CATGGCGTTGCCGTGGCTTCTGCATCCTCTGCGTACGTGTTGCTCGGCTTCCACTCGATTATGTAACATAGATAGATCGTCTG  
CGAAAAATAAACAACTAGAGTGTGAATGCCAGGAGCAGACAATCAAGATCCAAAGTGTTCTTCTAAGAAAAAGACACA  
GAAAGGGACGCATTGCTAGCTCTGCTGCGCTCAGCTGGCGGCTCTTAAAGCCTCGACAGTGTTTAGTGCCATCCACTCGCTG  
TTCTGCAGTCGACACCACAAGAAAATAGCAGCCACCCGTGACCGTGATGATAGACAATCATACAAACGACGGGACGACCCT  
TTGAAATGTCAAACTGCACCCACTAACCAAGCAATCTTCATCAACATGAACATGATCAAAATGCCAGAAAGAGGGGCTTCC  
TCCTCTCTACCTTATGCTCTTCCCTAATTAGACCATTGGTGCTGCCTAGACAGGACACAGGTTACAGCATCTGCTTTCCATG  
CTTGATCGAAAAGAAGCCA

>SsLRR-RLK233

ATTGATGTGACGGAAATCAACTGTTCTTTTGCAAAAATTTTGCAACCAACCGGGGCTAGGAAAAAGACACAGAAAGGG  
AGCCTTTCAAAAAGAGAGAAAAAAGACACGGAAAGGACGCGTAGGCCGCTCTAGCTCTGCTCAGCATTCAG  
CATTCAGCAGGCTCTTAAAGCCTCGACAGTGTTTAGTGCCATCCACTTGCTGTTCTGCAGTCGACACCACGAGAAAAATAGTA  
GCCACCCGTGATGTCAGATAATCATACAACGACCACTATGAAATGTACAACATGCACCCACTAACCAAGCAATCAGTCATCGT  
CAACATGAACATGATCAAGATGCATTGAAAAAACACGAGATCTTGAGCATCACTACCTGAAAAATTTGATAGGCCATGTT  
TCACAGCAGCTTGCTTCAGGCACTCCACTCTCCGGGGTGCTTCAAAATCTGCTGCGCAGTCTCTGTCACACGCTGCATGCC  
CATGTTACTTCCAGCCAGAGCCGAGGTCCATCACGCACTTGTGGAACAGGGGAGGGGAGCATGGGAAACGCGGAGC  
GTGCACATCACTGCATCAGCTGCAAGGATAACAGAAAGTAAACGCCTCGGGCCGAGGCGGCTAATCAGATGAAGAATAGTA  
CACCAGGTCAACCACCACATGTTGATACCTTGACAGCGGCGCGCATGATTGATCTAAATATGTGCCTTTTCTGTTACACCA  
ATAGGGTGTAAGGACATGCGATACAGATCCTGAGATAAGAGCTTGTAGTTCCAAAAAGAAACCTAAAAAGTGCTACAGT  
ATCTGTACATCAAACTTTACGGCACATGCATGGAGTACTAAATGTAAATGAAAGAAAAAACTAATTACACAGTTTAACTGTGA  
AATCATGAGACAAATCTTTGAGCCTAATTAATCCATGATTGGACACAAATGTCAAATAAAACAAAAAGTGCTACAGTAGC  
CGAACCCAAAAATTTTCCCCAACTAAACAGGCCCTAAGGTAAATTCATGCAGGCTCTGTGTTGACTGTAGAGTGAATCTGTG  
AAAATAGGTTATGTACAGTACAGGTAAATCATGTACATGATAATTAATTAATCAACAGGATTGATTCAAGGATGACTGGGAAAG  
ACAAATAGTTCTGTCGACAGTAAGCGTGGTCAGTTGGACTTCTTAATTGATCATAGAAGGTAGCCACCAATGAAACGTCAA  
AGTGCCAACAAACAGCGACCTGCTGTGTCTACTGCATAGAATACAATAGGTATGAGGAAATGTCTATAGCATCTAATCCTTC  
ACTCCATTTTCTCTCTGTAACCAACCAAGAAGGGATCAGAAAGATGGAAGAGAGGGGCTTCTCCTCTACCTTATGCTC

TTCCCTGATTAGACCATTTTGGTGCTGCCTAGACAGGACACAGGTTTCAGCATCTGCTTTCCATGCTTGTATCGAAAAAGAAGCC  
ATGCAGCGCGTCCATTTTTCATACAAGAAATACAGAAGTAGATTACCCATACCCAGTTCTTGCCATTGCTCTTGTGCTGCTGATC  
TCTCTGGCCACCCCCACCATGTTCTGTCACAGAGCAGGAGAAAGAAATCTCTCCAGTTCTCTTGGCTCTCGAAAGGATT  
CTGGTCTCGCCAAGTCATGGAAGGAAGAAGGCACTGATTGCTGCAAAATGGCAAGGGATCACCTGCGACGGTAACAAGGCG  
GTCAGTGAAGTCTCTCTGCCATCTAGAGGCCCTGAAAGGGTCAATCAGACCTTCTCTTGGTAACCTACCCAGTCTACAGCACC  
TTAATTGTCTTACAACCTCTCTGTCCGGTGTCTGCCGTAGAATTGGTGTCTTCTAGCAGCATCATCGTCTCGACGTCAGC  
TTCAACCACCTCAGCTGCATGAGCTGCCATCTTCAACCCCTGGCCAGCCTCTAAAGGTACTTAATATCTCAAGCAACTTGTTC  
ACAGGGCAGTTTACATCCACAACATGGAAGGGG

>SsLRR-RLK256

AGGCGTGTGCCCCACCTCCACGTTTGTCTGGGTGCCGTCCAACGTCCTTCCAGTCGTGAATGCAATGAGCGCGCTGAC  
CGACCGCGTGGGAAGGCCGATCGTCCACGCGCATGTCGCGTGGCTTCTGCTGCATCCTGCCGTGGCTTCTGCT  
GCATCTCCATGCTGCTGCAGCTGCAGGAAGCAGAGAGTCCGAGCCGACACGCCAGCCACTCTGTATGCTCCCAGCAC  
CAGCAGGTTCTCTGCGATTGGCTCTGAATCCTGATAGCCGGATTATGTAAGGGGGTGTAGTTCCAAAAATTTTACCCCCA  
AAACATCACATCGAATCTTGGCGCACATGCATGGAGCATTAAATGTAGACTAAACAAAAAACTAATTGACAGATTACCGT  
GAAATCGCGAGACGAATCTTTTAAGCCTAATTAGTCAATGATTGAACAGTAATTGCCAAATAAAACAAAAGGCTACAGTATC  
CGAATCCAAAAATTTTGCCAACTAAACACCACCTAATCATCGACAGATACGTCTGCGAAAAATAAACAAATAGTGTGTGAAT  
GGAAGGAGCAGACAAAGCCAAAGTGTCTTCTAGGAAAAACACAGAAAGGGAGCCTTTACAGCGGAAGGGACGCA  
GCGTAGGGCGCTCTAGCTCTGCTCAGCATTACGATTACAGAGGCTCTTAAAGCCTCGACAGTGTAGTGCATCCACTT  
GCTGTTCTGCAGTCGACACCACGAGAAAATAGTAGCCACCCGTGATGTGAGATAATCATACACGACCCTATGAAATGTAC  
AACTGCACCCACTAACCAAGCAATCAGTCATCATCAACATGAACATGATCAAGATGCATTGAAAAAACACGAGATCTTGAG  
CATCACTACCTGAAAAATTTGATAGGCCATGTTTACAGCAGCTTGCTTTCAGGCACCTCCCTCGGGGCTGCTTCAAATC  
TGCTGCGCAGTCTCTGTCACACGCTGCATGCCAGTTTACTTCCAGCCAGAGCCGAGGTCCATCACGCACCTGTGGAACA  
GGGGAGGGGAGCATGGGAAACAGCCGCGAGCGTGCACATCACTGCATCAGCTGCAAGGATAACAGAAAGTAAACGCCTC  
GGCGGAGAACTAATCAGATGAAGAATAGTACACCAAGGTACCACCCATGTTGATACCTTGACAGCGCGCCGATGAT  
TGATCTAAATTATGTGCTTTTCTGTTACCAAATAGGGTGTAAAGGACATGCGATGCCAGATCCTGAGATAAGAGCTTGT  
AGTTCCCAAAAAGAAACCTAAAAAGTGTACAGCATCTGTACATCAAATCTTACGGCATATGCATGGAGTACTAAATGTAG  
ATGAAAGAAAAAACTAATTACACAGTTTAGTTGTAATCAGGAGACAAATCTTTGAGCCTAATTAATCCATGATTGGACACA  
AATTGTCAAAGTAAACAAAAAGTGTCTACAATAGCCGAAACAAAAATTTTCCCAACTAAACAGCGGCCGATTCAT  
GCAGGCTCTGTGTTGACTGTAGAGTGAATCTGTCAAAATAGGTTATGTCAGATCAGGTAAATCATGTCACACTGTAATAATTC  
AACACGGATTGATTCAAGGATGACTGGGAAAAGACAAATAGTTTGTGCGACAGTAAGCGTGGTCAGTTGGACTTCTTAAT  
GATCATAGAAGGTAGCCCAATGAACAGTCAAAGTGCACAAACAAAGCGACCTGCTGTGCTACATGCATAGAATAACAATA  
GGTATGAGGAAATTGTCATAGCATCTAATCCTTCACTCCATTTTCTCTCTGCTAACCCACCAAGAAGGGATCAGAAAGATG  
GAAGAGAGGGCTTCTCTCTCTACCTTATGCTCTTCCCTGATTAGACCAATTGGTGTGCTTAGACAGGACACAGGTTACG  
ATCTGCTTTCCATGCTTGTATCGAAAAAGAAGCC

>SsLRR-RLK207

GTGTGTACACTAATTTTTGGTGTGGAATTAATGTCACCTTATGGTGGTATTTAATTTTTACAGTATTGTTATTTATTTGTGCG  
ATCCGTATGTTTTAATACAAAACGTTAGTTATCCCGTAGCAACGCACGGGCACGCTACCTAGTAATGTAAAAAGTTAAATC  
TCCCGAGCTGCGAGCTGCGAGATTAAAGTACTATTTACAAAAAGCCCATTTGTTTTATTGTTTTGATCTTGAATCTTCGTA  
ACGTAGAAGCCCCCACATTTTACAAGCTACCCCTATTAAGAATTGTGATTAAATAATACTCATTCCATTTTAAATTGTAAATC  
GCTTATTGTAAATATATGTATCAGAACGACTTACAATATAGAACAAATGAAGTACTCCTTGTGTTTCAAATTATAAGACATTTA  
AACTTTTTTAGATAATTGCTTTTACTATATATCTACGAGTAGACTAGATCTAGTGTATATCTAAGTGCCTAACACAACATACATC  
TAGAAAAATCAAAACACTTATAATTTAAAAACAGAGGAAGTAACATTTTACAAAAGTCTAATTTTATCGTTCAATTTCTCAGCG  
AGTCTAAATTTGACCACGCGACCGAATATCACACCGGAGTCTAAAAAAGTTGAGGGCGGGGCGCTGACCAGACCGCGTCCA  
CGCCCGCTGCTGCCACTCGTTGGACTCTGGACGCGTACGGTATGCTGCGCGCTCCGCTCACTGCTTGCCAGCGGTGGTCCG  
TGGAGTCTGCGGCGCCCTGTCTGCCTGCACTCGCAAGTCAGTAAGACTACCCATAGTTGGTACTTAAAGGATCT  
TTAAAGCTTTAGAGTATGAATATAGAGTAAAAACTGCTGCATCTGGGAACTTAAAAACGATACTCTATCCTTTCTCTCACTCTATA  
TTTAGAGTGGTACAGTCTTACTCTACAGTAAGCAGTGGTGGGCCCCACTAGCTAAACAAAGGAAAAAAATGCTATAACTCA  
CAAATCAAAAATTCAAATTAATTTTGATTGCACCATTAATCCGTCTCAATAAATCCTTCAAAACTAGATCACACATGGATAT  
ATTTAGATAAAGTGACAAGTGGGTCCACAGTAGATAGATAGGATGAATATAGAGGATAATATAGAGGATGGATGGGTGCGAGAGAAT  
TGAGTATAGAAGAGAGAATCTTGCTGACTAGGACATATAAAGGATGAATATAGAGGTCCATGAGTGCAGGATAGCCTTGGTAG  
AGCGCAAGCCGGCAGCGCTACGCCAGCCCTCGCTCCATCTTCAGTGCAGGCCTGGCTCTGCAGCTATACGCTCCATCTCC  
CAATCTCCCAGTGCTCCCTCCAATTGCCTTCAACCTGAACACATGATAGATGTGTTAAGTTACGATGTGTTGAGGAATAAAC  
AAACTCAGCGTAAATGCAAGGAACACAAAAACAAGTATATGACAAAACAAATAGGGACGCAACGCAACGCCTGCTCA  
GCAGATTCTTCGGCTCAGCCAGCCACATGCTGTTCCGTTCTGCAATCAACACCACGAGATGACAGATAATCATACAATGGCT  
ACTAAGAGCCAATACAAAATGTGCAATTGCGCTCATACTGTAACCAAGCATAATCATCAACATAATCTCAACCAATAAAAAAT  
TACTTCCCTCCGTATATAGCTGTTCTACACTAGGTCAAGTAATATTGGTGACAGGTAAACCCAAACAGAGGGAAGTACAAT  
ATCACGATGACCACAGACAGGTAAACCCAAACGGAGGGAAAGTAAATATTGATGACAGGTAAACCCAAACAGAGGCAAG  
TGCAAAACACACGAGATTATTGTCATCACCACTGAATGAATAAATTTGATAGCCAATTTACACTTCACGGCAGCACCTCCA  
TGGCTGTTACTTCCAGCACTTTTGAATTCGGTTCAGCAACACAAGCCGTGGCCCGTGGACCAAGCTCCATCATGCGCCTCT  
GGAACCTGGGCCA

>SsLRR-RLK220

TTGTAGCATGTACCTGTAAATCGAGTGGCACAGAGTTGGCAAGGCAAGCTATGCAAATCAAGATAAATGTATCGGAGACGA  
TGAGCCCACTAGTTTTATTCTTGAGTTTGTATTAATAAATGATGTAAACCATCCATAATTAATAAAGCTTGTGGATGCATTTG  
TCAAAAAAAAACATCTCCTTAACCATATATCCAATTTGCAAGTTGTTTTTACCATTTTATTTCTCGTACCGTGATCCCAACG  
ACAGAACAAAGATCCCACGTTTATATTTTTTTCATGAACGTGCTTGATTCCATGCACGTGTGCCATGTTTTACAGCGAAGAA  
AAGATAATAGCATGTGAATCCTACAGGTCAATTTTACACAGGTCTAGCAAAATTTGGCAGGACAACTGTCCAAACACTCTT  
CGCAGCTCTACATTTTGGTATTGGCCAAAAATTTGTTCCGTGCAAAACCAAGCATTAATTTATAGACCTAATTTTATCACTAGT  
CAAATTTGGCCATAACCAAGATTGACTCAACCAGGCACCTCCACGTTTGTCTGGGTGGGTCCCGTCTCCATCCAGGAGTG  
GGAAGACCCGCGTGGCTCGTCTGCACGCGCTTGCAATGCGGTTGCCGTGGCTTCTGCATCCTCCTGCCGTACGTGCTTCG  
GTTTCCACTCGATTATGTAACATAGATAGTCTGCGCAAAATAAACAACATGAGTGTGAATGCCAGGAGCAACAACA  
AGATCCAAAGTGTCTTCTAAGAAAAAGACACAGAAAGGGACGCATTGCTAGCTCTGCTGCGCTCAGCAGGCGGCTCTTAA  
AGCCTCGACAGTGTTAAGTGCCATCCACTCGCTGTTCTGCAGTCGACACCACAAGAAAAATAGCAGCCACCCGTGACCGTGA  
TGACAGACAATCATCAACATGAACATGATCAAGATGGAAGAGAGGGCTTCTCCTCCTCCTACCTTATGCTCTTCCCTGATTA  
GACTATTCGGTGTCTGCTGACAGGACACAGGTTCAGCATCTGCTTTCCATGCTTGATGCAAAAAGAAAGCCATGACCGCT  
CCATTTTTCATACAACAAATACAGGAGTAGATTACCCATACCAGTTCTTTCCATTGCTCTGTGCTGCTGATCTCTCTGGCCAC  
CCCCACCAGTTCTCTGCACAGAGCAGGAGAAGAAATCTCTCTCCAGTTCTCTTGGTGGGCTCTCGAAGGGATTCTGGTCTCGCC  
AAGTCAATGGAAGGAAGAGGGCACTGATTGCTGCAAAATGGCAAGGATACCTGCGATGGTAACAAGGCGGTCTGATGAGT  
CTCTCTGCCATCTAGAGGCCCTGAAGGGTCAATCAGACCTTCTCTTGGTAACCTCACCAGTCTACAGCACCTTAACTTGTCTCT  
ACAACCTCTCTGTCCGGTGTCTGCCGCTAGAATTGGTGTCTTCTAGCAGCATCATCGTCTCGACGTCAAGTCTCAACCACTC  
AGTGGAGACCTGCATGAGCTGCCATCTTCAACCCCTGGCCAGCCTCTAAAGGTACTTAATATCTCAAGCAACTTGTTCACAG



GGCAGTTTACATCCACAACATGGAAGGGGATGGAGAATCTAGTTGCGCTCAATGCCAGCAACAATAGTATTACTGGTCAGAT  
TCCAAGCCATTCTGTGACATATCTCCATCCTTTGCGTGCTTGAACCTGCTTCAACCAATTCAGTGGCCAGAGTTCCACCAGG  
GCTTGGTAATTGCTCAACACTGAGAGTGCTCAAAGCTTGCCACAACAACCTCAGTGGGACACTGCCAGATGAATCTGTCAA  
CGCTACTGCGTTGGAGTACCTGTCTTTCTGTAAACAATGATTTGCACGGGGTACTTGATGGTGCACGCATAATCAAACCTCAGAA  
ATCTGGAAATCTTGTATCTTGGGGGAAACAACCTTCACTGGCAGGCTTCCGTATGCCATAGATCAGCTGAAGAGACTGAAGGA  
GCTCCATTTGGACCACAACAAC

>SsLRR-RLK234

GCATCCTCCTGCGGTACGTGCTTCGGCTTCCACTCCATGTCTGGCTGCAGGAAGCAGAGTCCGAGCCGACACGCCAGCCAC  
TCGCTCCTCCTCAGCTGCTATGCTCCAGCAGGTTCTCTGCGATTGGCTCTGACTCCTCATAGCCGGATTATGTAATACGTCT  
GCAAAACATAAAACAACTGTGAGTGTGAATGCAAGGAGCAGACAATCACAAGATCCAAAGTGTTCTTCTAAAGAAAAAGACA  
CAGAAAGGGACGCATTGCTAGCTCTGCTCAGCTCAGCAGGCTCTTAAAGCCTCGACAGTGTTTAGCGCCATCCACTCGCTGT  
TCACCCCGTGACCGTGATGATAGACAATCATAACAACGACGGAACGACCCTATGAAAAGTGCAACTGCACCCCACTAACCAAG  
CAAGCAATCATCATCAACACGAACATGATCAAGATGCCAGAAAACACACACACACACACACAGAGATCTTTAGAATCAC  
TACCTGAAAATTTTCGATAGGCCACGTTCAATTCATGCACTCCACTCTCGGGGGGCTGCTTCAAATCTCAGCTTGCCCTGCTGT  
ATCGTGCACACGACGCGGCCAGTTTACTTCGAGCGCGTTTGGATTCCGGTTCAGCAGCCAACAAGAGCCGCCGGGGTCAAG  
GGCCAGTGACCTGTGGGTCAAGGGCCATGGGAAACAGCCACGAGCGTGCACATCACTGCATCAGCAGCAAGGATAACAG  
AAAGTAAACGCCTCGGACGAAGAGTAGGGCTCCAGGTGCCCTCAGCCACGCCACCTTCTGCCTTTCTTATTCTCCGGCTCC  
ACTTGCGACAAATGCTATACTCCAAAGTCCAAACCATGTTGATACCCTGACCACATCGCACGATGATTGATCTAAATTATTGTA  
CGCGTGCCCGGAGTGATGCTCTCCGAGTACTGTAGTGTCTTAAATTAATCTTGAAGATCTTCGGTTCTTCTTGGGAAACGT  
GTAGCTTTTCTGTAAACAAAAAAGGTGCATTATGTATAAAAAATAGAAACATTCATCAAGCAGTGGTTCATTTTCTTTT  
CTTTTTCAGTACTAATTAGGTTAAGACAACAGGTGGCTGGAAGCTGGTAGCACAAAGTGCACAAATTTTACCAATTTT  
TTTATAAGTGTGATGCCATATCCTGATGTAGATAGAAAGGAGGCTGTATATCCAGCCCTTGTTTAGTTCCCAATTC AACCT  
CAAATTTCTACTATGCAAAAAGAAGATTCCTCATCACAATCAAAATACCGGCACATGCATGGAATACTAAATGTAGATGAAATTTA  
AAACTAATCGCCACAGCTTTTATTGTACTTTACGAGACGAACTTTTAAAGCCTAATTTGTCAAAATTTGAACAATTTTACCAAT  
ACAAACGAATCGTACAGTGCGCATTTAATGCGCACTGTAGCGAACTGTTCCAAATCGGGGGTGGCCGATTGGGAACTGAA  
CAAGGCCCCAGTCAAATTTGTCAACAAGAGTTATGTCTGATCAGGTAAATCTCGGCAGCCCTGTAATAATAATTCAGCCAGGAT  
TGTTAATGATGACTCGGAGAAGGCAAATTTCCCTGTTCCGCTGAGCTTATCAGCCGTGGAACAGTGTCTTCTCTCACA  
GCAATCAGCCACAGCCGGCTTATAAGCCAAAAAACAGCCTGCCGAACAGGGCCATTTTATATGGCCACGAAGCTGTTTCA  
GATGGATCAGGTATGAAACGTCAAAGTGTGAACAAGCAGGCTGCTTCGTCTGGTGATAAAATGAACCATAATGAGCATTT  
TGTTCTAGCATCTAATCCTTGACTCCATTTTCTTTGGGTGGCCACGGCTATCGAGGGAAAAAGCAAGAGCCAAGAGCCGCC  
TCCTTCTACTTCTATCTCATGCCCCTCCCTGTTAGACCATTGGTAGTTCGTCAAAACAGGGCATAACTTAAGCATCTGGTTCC  
CATGCTAGTTTCAATAGGAAGCC

>SsLRR-RLK210

GTGAACGTGCTTTGATTTCATGCACGTGTGCCATGTTTTTATAGTGAAGAAAAAGATTGGCAGGACAACCATCCAAACAC  
TCTTTGACGCCCTGCATTTTGGTATTGGCCAAAATTTTGTTCGCTCACAAACCAAGCATTAATTTATAGACCTAATGTTATCAC  
TAGTCAAATTTGGCCATAACCCGGATTGGCTCAACCATGCACCTACCGTACGTGCTTCGGCTTCCACTCCATGTCTGGCTGC  
AGGAAGCAGAGAGTCCGAGCCGACACGCCAGCCACTCGCTCCTCCTCAGCTGCTATGCTCCACAGAGGTTCTCTGCGATT  
GGCTCTGACTCCTCATAGCCGGATTATGTAACATAGATAGATACGCTCTGCGAAAAATAAACAACCTAGAGTGTGAATGCAAGG  
AGCAGACGATCACAAGATCCAAAGTGTCTTCTAAGAAAAAGACACAGAAAGGGACGCATTGCTAGCTCTGCTCAGCTCAG  
CTCAGCAGGCTCTTAAAGCCTCGACAGTGTTAGCGCCATCCACTCGCTGTTACCCCGTGACCGTGATGATAGACAATCATA  
CAACGACGGAACGACCACTATGAAAAGTGCAACTGCACCCACTAACCAAGCAAGCAATCATCATCAACACGAACATGATCA  
AGATGCCCAAGAAAAACACACACAGAGATCTTTAGAATCACTACCTGAATAATTTTCGATAGGCCGTGATTGATGCATCCG  
CTCTCGGGGGGCTGCTTCAAATCTCAGCCTGCCTGCCTGTCATCGTGACACGACGTTGCCAGTTTACTTCGAGGAGCGCG  
TCTGGATTCCAGTCAAGCAACAAGAGCCGAGGGGTCAGGGGCCAGTGTACCTGTGGATCAGGGGGGCCATGGGAAA  
CAGCGCGAGTGTGACATCACTGCATCAGCAGCAAGGATAACAGAAAGTAAACGCCTCGGGCCGAGGCCAATCAG  
ACGAAGAATAGGGCTCCAGGTGCGCGTCATCCACCACCTTCGTATCCTCTCTGCCTTTCTTATTTCTCCAGCCTCCACTTG  
CGACAAATGCTATCCTCCAAAGTCCAAACCATGTTGATACCTGACACATCGCCCGATGATTGATCTAAATATTGTAGGTGC  
ACCCCGGAGTGAATCTTGAAGATCTTCAGTTTCTTTGGGAAACGTGTAACCTTTCTGTTAAACAAAAACATGTATAAAAAATAG  
AAACATTCATCAAGTAGTCAATTCCATTTTCTTTACTTTTTTCAITTCAGTACTAACAGCTGAGGTTAAGACAATAAGTTGGTCAG  
CTGAAGCTGGTAGTGGTAGCACAAGTATGCCATATCCTGATCTCAGATAGAAAGGCAGGATGTATATTCCGTCAAATTTGTC  
ACAAGAAGTTATGTCTGATCAGGTAAATCTCGGCAGCATGTAATAATAATTCAGGTAATCTCGGCAGCATGTAATAATAATTC  
AGCCAGGATTGTTAATGATGACTCGGAGAAGGCAAATATTTGTATGGCCAAGAAGCTTGTTTCAGATGGATCAGGTAGCCA  
CCAATGAACACGTGAGTGTGAACAAGCAGGCTGCTTCGTCTGGTGATAAAATAGAACCTTCTAGCATCTAATCTTGACTCC  
ATTTTCTTTGGGTGGCCACGGCTATCAAGGGAAAAGCAAGAGCCAAGAGCCCTCCTCTGTACTTCTACCTTATGCTCTTCC  
CTGTTTAGACCAATTTGTAGTTTGTCTTAAACAGGGCATAGCTTAAAGCATCTGGTTCCCATGTAGTTTCAATAGGAAGCCATG  
CAGTCACTCCATCTTTTCAACAAGAGGAACCAAAACAGCATGATGACATACCTTCCATTGGCCGTGACATCTGACATCTCTC  
CTTGGCGCCTTGACACAGTTCCTGCATGGAGCTGGAGAGGACATCCCTCCTCAGTTCTCTCAGAGCTCTCGTGGGATGCC  
GGTCTACCAAGATTGGCAAGGT

>SsLRR-RLK257

CCGCCACGAAAAATTCGGATCGTCGTCGTCGGGGGCGACATCCAGCGGGGCTGGTTCGATTTTGGCACACGCCCGCCCCA  
AGATGGCCTGCACTACGTCGACGAACGCGCGTGACGCGGACGCGTTGCAATGCCACCAGAACCCTGAACCGGAAGGAC  
TCTGCCGTGGCTAAGGACGTCCGTCTCCATGGATGCCAAATGAGGAGGAAAGGTGGGTATGGATCCTTGATGCAACACCC  
TTAACATGTCTCGCAGTGTGTAATCTTACAATGAAATCTTCAGGTTTCATGCCGACGCAACAGACGCATCCCTGATGCCAG  
GCGCTCCTCAAGGTAGGCACGACCATGGCGGGGACACATGGGGCTGGTGCCGGCAATGACAGCCACCAGAGCCCGGG  
CAAGGTCCCGCTCCGCGCCCTCCAGCTCCGCAGAGCGAGGCCACCTACCAGGTGACCGGCAGCTCCCGCACTAGGCCA  
GGCGCTTACGTGGCGGTACATCGCCGGCTGCGACGAAGGGGCGCAGCACTGTGGCAACGAAGTAGATCGCCCGTAGA  
GACGTGGCGGGCCGATATCGTGTGCGCCGGAGCCCGTGAGCGCCCACTCCGCGAGGACGGGTCTGTGGCGCCTGCTGACG  
GTGCGCGGCCCGGCATACCGGGAACGCGCTGCTTCCACGAGTGGCGCGCTTCGTGAGTGGCCCGCCCAAGGGGG  
GGAATGGGCAGCCCCGAGGCGATGGCATTTCGTCCCAATTTGGTGCAACACGGCGGTGAGGAGCATTGGGCCTTGACAT  
GCTGTTCCGCTCCCGAGTTGAAGCATTTTGCCCACTAAGTGGCGGCACTGGCCTGAAAGGCCCTGGAAGAGGCACGCTGC  
GCCACCGCTTCTGCTCTGGACGCAGCGGAAGCCGTCCGCATCAGGGACGCCGGAAGCACGCGCCGGGTGGGCGGCCGGG  
GGGTGCCGACGGCGCCGTCATCACTCCACGTTGCCGGGAGTCCGTGAGAGAGGCCCTTCAACCGCGCGGTGGGAACGGCG  
TGCCGCAGCCATGAATCCGCCACAATCCAGCACGACGGCGACGGCGTCCGTGGCGTCCGGCGCGGGCGCCCCCTGAA  
CCACCGTCTTCCCTTGTCTCCGAGTGGAGAGGCGCCTCAGAACCTTCTCCAAACCCGAAGGAGGCTCCGAGTCAA  
AGAAGGAGAGGTGGCCGCCGAAGCCCTCAACAGGAGAGCGCCGTAGAATGGCGCCGCGGCCAGGCCGGGGCGGACCGG  
ACCGGAGTCCGGCGGAGGAGGCACCATAGAAGGGGGCCGATTGGGGTTAAGACCCGCGGACGCGCGCGGCGGACCTTCC  
CGGCTACTTCTCCACCCAGGATATCGCGAGGCGGATCCACCTTCATGGGACCAAAACCGACGAGGGGGGGGGTGC  
AGATCCGGGGCGGCCAACGCCCGATCCGCGCCGAGAGGGCGGGATGTAACGCCGGAGCTCCCCGACCAGAGAGCAGGGG  
CCGGGGCAAAAAGGGGGGGGAAAAAGGGGGGTGACGGGAGAGCGAGCGCAGAAACGGTGGGCGGCGCAGCCGGAGTGG  
CAAGCGGCGGGCGGGGGGGGGGGGGGGGGGGTGGCACCGGCGCTGGGGGGTGGGCGGCGGGGGCGGGGTGGCC

>SsLRR-RLK221

>SsLRR-RLK258

>SsLRR-RLK222

CCGCAGCAACAACCAGCAGCATACGGCGAAGCGCGCTTTATTCGTTCTGCAATGTAAGTTCATAGCCTCTCAAGTTCACACT  
GCTGCTCCGGTTTCAAGTGTTTCAATGTGCTCATAGAGATAGTGATGCACAGTGTTTATAAAAGATAAGTGTAAAGTGTAT  
ATACATATATGTAACGCGTCATATATGTATTGTAATCATATAAAATATACATATAGTAATTCATATGCAATGCAATGTCATTG  
GTCTTTGTGTTTAAGCACATATGTGGCAACGATGAAAACTTTCGAGGAGCAATGACTTCACCGATAAGTTCGTAGCTCTCGT  
CGCCTGGTGGTTCGTCAAGTCGCCATCGTCATGCTACGCAGGATCCACAGGCCGACTGCTGAGTACATGTCGGAAGCAATG  
GTTGTAGTGCTGAGGAGGTGAGCTCTGGTTTCAGACACGAGCAAGCGCTTGAGATTAAGAAAGATTAGGGGAGGAAAGAT  
GACGTGGCAAAAGCCTGGCCATTGTATACCGTGTCTGTGGCGGAGCCAGAAGCTTTTAGAAATCCAAGTAATATTATTATA  
AAAAAATTACTTAGCAAATTACAATGTTCTTTAATATAAGAAATATTTCTTTAAATTTTCATCGAACGCTCGGCCGAG  
CTGTGCCTTCGCTATTGGCTATGCCACGTCATCAAAACCCTAGACTTGATGCCACACAGCTAAACCGGTTTTGGTTTAGAG  
CAAAAAGTGAAAAACAATCTTTTGGAAAAATGACACAGTTAAGTAGACGATTTCAAGTGTTCCTTGATAAGAGACGATTT  
CATAGTTGAGTGTTACTTTGAACCGAGGCTGAACTTTAAGTTGAAGGCGTAGTTTGGACCTATCCAATAGCATACCCACC  
CCAATAAATATATCCGGTAACAACCTGAATTGGTGTGGCTGCCAAAGAAACCATTTTCTTTGCAAAAAACAAGAGATTAGG  
CCAGCCTCTCAATGGGACAGGGTTGCTTCGATTTTCGCCATCTTGATTATATATAAAATATAATTGATAGATATAGGAAACCGGT  
ACACTGCAAAATGTCAGCGACACTTGAGGTCAACTAAAGCAGAAGAAACAAGGGCAAAAATATTGAACCGGTTTCATGCA  
CAGGTGAGCACCAACATTTTGGTCAATTGAACAGCTGATGAAGATGAATGAGAAGTAGAAAAGTCTATCATGCTGCTTTGGG  
GACTCAAATTTGGCCACAACAGCACTGAAGAGTAGTGCATTAAGTAAAGACTGAGATAATGAATGAAAATAATAACAGTAGT  
GTATATATTAATAATTAATATAGATGCAGTGACACCACCTAAAGTATGCAATATCCTGCAAGGCCCTCGTTTGTAGTTCAGTGAAT  
TGGGGAGAAAAAATCATTAATCATAGATTCCTGTAGCAATTTCTTTGTTTGGTAAAAATATCCAAAATTTGACTAACTAGGC  
TTAAATGTTCGCTCGCAAAAGTACAACAAAATATACAATAGTTTTTGATTTCATCAACATTTAGTACTCCATGCATTTTGGC  
GACATTTTGATGTGACGGAGAATTTTCTTTTGCATAGTAGAAATTTGGGAGAGAATTGGGGGAACTAAACAAGGGGCAACTT  
TGACTCAATAATCATCAATCAATGGGGCGGTGGGTACCAAGAGCAGACTTTTGTGTTGCGCAGAAGGTTTGGACTTTTTCATA  
GATTATCATATATATACCGCTGGCTCATCCAAAACGTGAAGGTCGACCGTGTGAATAAGCCGGGAAGCTGCTACCGACTA  
TGGCAATTGTGCGGAAACCGGTTGTGGATGTGTGCCACATCAGCCATGCAGTACTGTGACCAATTTTCATTTCTCTCGCGCT

>SsLRR-RLK211

AATGTTCTCTTTTAAATATAAAGAATATTTCTTTTAAATTTTCATCGACAAGCTCGGCCGAGCTGTGCCCTGCCTATTGGGTATGCG  
 CACGTCATCAAAACCACCTAGACCTAATGCCACACACCTAAACC GGTTTGGTTTAGAGCAAAACGTGAAAAACAATCTATT  
 GGGAAATGACACAGTTAAGTAGACGAGTTTCATAAGGCTTTTCTGTGATAAGACGAGTTTTCATAGTTGAGTGTCTATTGGAACCG  
 AGGGCAACTTGAAGTTGAAGATGGTAATTTGGACCTTTTCCAATAGCATACCACCCCAATAAATATTCGGTAAACAAC  
 GAATGGTGTGGCTGCCAAAGAAACAAACACAAGAGATTAGGCCAGTCTCAATGGGTAAATTCATTATGTTGTTTCCAAGATT  
 GCCATGACTATTTAAATAAAATGAACTAGGATGAAACACCCACTCTCAATCGAGAGTTTATATTACATGGTTTATAGTCATTTA  
 ATTCTCAAGACTCATAGAGAGTTTCTCATAGATTGAACTCATTTCTCTCTCTTCTTAAATATTATTTACTTAGCAAAATACAATGT  
 TCTTCTTTAATATAAAGAAATTTCTTTTAAATTTTCATCGACAAGCTTGGCCGAGCAGTGCCTTCGCTATTGACTGTGACACG  
 TCATCAAAACCACCTAGACTTGATGCCACAGCTAAACC GGTTTGGTTTGAACAACAAACGTGAAAAGCAATCTTTTGAAA  
 AATGACGTAGTTAAGTAGACGATTTTCACAGTTTTTTAAATGTAAGAGATTTTTTTAAATGTAAGAGACGATTTCATAGTTGAG  
 TGTACTTGAACCGGAGGTGAACTTAAAGTTGAAGAGGAGTTTGGACCTATTCCAATAGCATACCACCCCAATAAATAT  
 ATCCGGTAAACAACCTGAATGTTGTGGCTGCCAAAGAAACCAATTTCTTGCACAAACCAAGAGATTATATACGCTCTCA  
 ATTGGACAGGGTGTGCTTCGATTTTCGCCATCTTGATTATATATAAAATATAATTGATAGATATATGGAAACGGGTACACTGCAAAA  
 TGTACGCCGACACTTGAGGTCAACTAAAGCAGAAGAAACAAAGGGCAAAATAATTGAACCGGTTTCATGCACACGTGAGCAC  
 CACATTTTGGTCAATTGAAACAGCTGATGAAGATTGAAATGAGAACAATAGAAAGTCTATCATGCTGCTTTGGGGACCTCAAATTTG  
 GCCACAACAGCACTGAAGAGTAGCTGCTCAATTAAGTAAAGACTGAGATAATGAATGAAATAAATAACAGTAGTATATATAA  
 AAATTATTAATATGAGATCGAGTCAACACCTAAAGTTATGCATATCCTGCAACTTTGACTCAATAATCACATAATCAATGGGCG  
 GGTGGGTACCAAAGCAGACTGTTTGTGTTGCGCAGAAGGTTGGACCTTTTCATAGATTATCATATATATACAGGCTGGCTATC  
 CAAAACGTGAAGGTCGACCGTGTGAATTAGCCGGGAAGCTGCTACCGACTATGGCAACTGTGCCGGAAACGGGTGTGGATT  
 GTTGCCACATACGCCATGCAGTACTTAGCCAAATTTTCATTCTCGGGTGAAGCGCTGCAACAGATAAACAGGACAGAGA  
 ATCAAACGTGGGGGCTGCTTGTGTCTCTACATCTTCTCTCTCGCGCTCTTCTCTCATTGGGCATGGTTCATCCAGTCAGC  
 ATCAGATTCAAGAACTGCTTTGATGCTAGTTTCATTTCATCAGGAAGCCATGCAGCAGCAACCAAGTGCATCATCCCTCATGCG  
 AGAAGTACAGCAATGGATTCTCAAACCTTTTCTAGGCCTCGCGCTTGCAGCTTTTGCTACTCGCCTTTCTCCACCTACTACA  
 AGCTCGTGT

AAACCTTGA AATGCATTTTTTCACGA ACCATATCGCACGCTAGTAGTAGTACGCCATACGCTGTGTGCACCAACCAATGCATCCAT  
GCAACAAGCAGCGGATCGATCCCAACCGCAGCAACAACACGACAGCAGCATACGGCGGAAGCAGCGTTTATTCGTTCTGCAATGTAA  
GTTTCATAGCTCTCAGTTCAGCTGCTGCTCCGGTTTACGTGCGCTGGTGGTTCGTGTCAGTCGCCATCGTCATGCTACGCGACA  
TCCCAAGCAGCGCCGACCGCTAGTACATGTGCGGAAGCAATGGCTGTAGTGTCTGAGGAGGTGAGCTCTGGTTGACGCGCA  
GCAAGCAGCAGAGAGATTGAAGAAGAAAGATTAGGGGAGGAAGATGACGTGGCAAAACCTGGCCATTGTATAACCGGTGTC  
TGTGGCGGACGCCAAGAGCTTTTAGAAATCCGAAGTAAATTTATTATAAGAAAATATGTGTCATGTAGCAAAATTACAATGTCTCTC  
TTAATATAAAGAATATTTCTTTTAAATTTTCATCGACAAGCTCGGCCGAGCTGCGCCTGCGTATTTGGCATATGCCACGTCATC  
AAAACCACCTAGACCTAATGCCACACACCTAAACCGGTTTTTGGTTTAGAGCAAAAACGTGAAAAACAATCTATTGGAAAATG  
ACACAGTTAAGTAGACAGCTTTTCATAAGGTTTTTCTTGATAAGAGACGATTTTCATAGTTGAGTGTTCATGAAACCGAGGGCGCA  
ACTTGAAGTTGAAGATGGTAATTTTCGACCTATTCGAATAGCATACCCAAACCAATAATATCCAGTAAACAACCTGAATGGT  
GTGGCTGCCAAAGAAACAAACAAGAGATTAGGCCAGTCTCAATGGGTAAATTCATTATGTTGTTTCCAATATTGCCATGTG  
ATTAAAAATGAAATGAAACTAGGATGAAACACCCACTCTCAATGGAGAGTTCATTCATCGGTTTCATAGTCATTTAATCCA  
AGACTCATAGAGAGTCGGTAATCGTGTCAAGAGAGTTTCACTTAGATGAAACTCATTTCTCTCTCTCTCTTAAATACACTG  
CCATGTCACTCAAAAGTCCGTCAGTAGTAACTATTTAATGCAAAATGAACTACGTAAGTAACTCCCACTGAGACTGGCCTTATA  
TCAGCCTCTCAAGTGGACAGGGTTGCTTCAACTTTTCGCCATCTTGATTATATATAAAAATATAAATTGATAGATATATAGAAACGGT  
ACACTGCAAAATGTACGCGCACACTTGAGGTCAACTAAAGCAGAGAAGAAACAAGGGCAAAATAATTGAACCGGTTCTGTCGA  
CAGCTGAGCACCCACTATTTGGTCAATGAAACAGTTGATGAAGATGAAGATGAGAAGCTATGATGCTGCTTTGGG  
GACTCAAATTGGCCACAACAGCACTGAAGAGTAGCTGCATTAAGTAAAGACTGAGATAATGAAGTAAAAATAAACACTAGT  
GTATATATTAATAAATTATTAATATGAGATCGAGTCAACCTGTAAGGGCTGTTTGGTTTCCAGGAGTTAAAGTTAACTCCCAT  
CACATCAATGTTCCTCTGAGTGGAGTACTAAATGTAGACTAATTCATGTCATGCGGCTAGATAGGAGTAAATTTACGA  
GCGAATCTATTAAAGCTAATTAGTCCCGAGTTGAAAACCTTTTGTGCAAAATAGACAAAAGTGCTACAGTGTTTGTAAACCT  
TAACTCTCCAACCAAAACACCCCTAAAGTTATGCATATCTGCAACTTTGACTCAATAATCACATAATCAATGGGTGGGTGG  
GTACCAAGACGACCTTTTGTGTGCGCAGAAGGTTTGGACTTTTTCATAGATTATCATATAGTATATACAGGCTGGCTATCCA  
AAACGTGAAGGTCTTACCGGTGTGAATAAGCCGGGAAGCTGCTACCAGCTATGGCAATTGTGCCGGAACCGGTTGGACGT  
GTGCCACATGAGCAT

ASACR-KLR2J3  
ACAGTGGGTGACTCATAAACTAGCTCTAAATAITTTTTTATTTTAAATAGAAAGGAGAAAAAGCTAGTTTTTATCAAGAGTTAGG  
CTCATACACACAGTCTCAAGAAATATAAGAGGTGTCATGTGGGCCTAATCATATTAGAGCCATTGCTAAAAACATAGAGATTGGC  
TTAGAGCTAGTAACCTAACCTTACTGTTACAGGGCGCCCTAAGTGGTGTTAAAGGATCTGTTTGGTTCCTCGCAACTAATAGTT  
AGCTGCTAACATTATCTGAAGATCTTTTAGATCTCTCAATTAATAAGCTCAACTAGTATTAACTCATACGCCAGCTAGCAATT  
GGCTATTTGGCTATTAGGTGCAGATCTATTTACATCCTCAACTAATAAACTCAACTAATGTCTTACCTATCATCCAACAAGCAA  
TAGCTGTTACCTGAGGATCTGTTGAAATCCTTAGGCTAAAAAACTCAACTCAACTATTGATTACCTATTATCTAGCTAGCAATA  
GATTTTTCTTAGCTAACACAACATAATAGTTAGCTGGTGGACAAAGAGGCCCTAAATGACTATTGTATCAATAAATCAATA  
TCGAGAGTTTTAGGTACTCTCTCCATCTGGAIAAAAAACCAATGGAACACTACCGAATGAAATATTTTTATTTTTTTAT  
CAAAATATATAAAACCAATATTATATAGTACTATGGGTGCGTTTGGTTGGCGACCAAAGGATGCAAGGCCGTGCCACACG  
TTCCGTGCCACAGTTGCGGCAAGCGTTTGCTTCGTGGCCCTAGTTCCGGCATGCGCGAGAAGTCCCGGTGGTCATATAGTTTAT  
TTGAAAGCCAAATCGTGCCGTAGTTGCGCACTCCGTTTTCTGCGCGCACTTCGGCATGCCAACACTCGCGCGGCATC  
TGTTGGACATCGTCCAACACGCCCTATATATATAGGTATCATTAGATTCATCAAGAACATATTTTTATAGTATATCTGTTTTGTT  
TATTATAAATTTTTAATCTATTGTATAAAATTTGTTAAATTTTAAAGTATTTCTACTAGATAGGATCATAGGATATATCTTTTTCATT  
TACTAACACAATCTTGAAGAACGCTCTGGATATAATCGCTGATGAAAAAGTCGCGTGTAGTACTCGCACGGCTGTCGCCGTC  
GCCCGCTTGACTCCACCTCTGTGGCTCTGTGGCGTCACTTCCAAAGTCAAACCTCAAACAACCGCCGCCACCACCTG  
GGCAACCAGGAGCATTATATTCTTACGACACACTCGGTTGATCCGCTGCCCCACCAATTTCGTCCACTGGTTTTATTAAACG  
CCTGCCGCTTATAATTGACGCCGAATCAAACGACCACTAGCACTGGTGGCGCTACCATTCCGTCGATGCTGTCTCGATG  
AGAGAGAGACGAGCAAGATATGAGAGAGAGAGGTGTGTGTGTGGAGAGGAACAAGAAATTGGATCTCTCGTAATAAA  
GAAAACGCAAGCGAACAGAGGGAAAGATAAAACAAGTCCGATCCGCACTGCTGAGCGCATCGGAGTCAAAACCAACCGTCC  
CTGTCTGCTCTGACTTTCGCCACCACTGCTCCCTGTGATGTCTGCTCTTCTTTCGGCGCCTCTCAATCCAGCGCGGACC  
AAGCAGACGAGGATGACGAGGTCGACGAGATCTCTCCATGCAACGCTGCTTGCCTTTCTTCTCTCTCTGAGCCTGC  
CGTGCCGCTGTCGCTGTGAATTTTCGCTCGTTTTAAAGCGGAGCCTTTCTCTTCTTGGAGCTTCTGCGACGACTGCTG  
CTCTGCTCTCGTCTCTCTGTTCTTGGTGCTCGGTGATGCATGCAGCGTAGCAAGGTGGTGTGAGTGAGCTCCGGCGAGA  
ATTGCTTGTCTTCTTTCGGCGCTCGCGGTGTTATGCCCTGCAGCAAAAGAGCCTCTTCTTGGATCCCGCCGCCGCTG  
ACCGCG

>SsLRRL-RLK157

TATCACTACCTTTTATTAGTTTGAGCGGACGCTATGAAATATAATGGCTCTCAACCAAGGCTAACCATCGAATTGACATGGTG  
TTGACTTTTTTTTTCTCCAGGATATGTATTGATATACGTTGCCGCTTTGATTGTTGGTCTTCTCTCTGCCACTACTTGAATGGA  
GAAGGCTATCAAATTAAGGTATTGACAATAGTTTCAGTTTCAGTTGTCGTCCTGTCTTTTCCGAATCTGTATATATAGTTAGGGC  
ACTGCAAGCATACAGTTCTCGGAACTACAAAAGTTTGGACACTTTGTATATGTTGTGGGTTCCTTTTAAAGGCACTCCCCCTTA  
TCTACTTGAGAAACAAAATTTAGCCCTAAATTTATATAGGAGCTAATGTAATTAATGATTAATAATATGTTAACTGTCTAATT  
AACCTGCTATTGCTGGTGCCACGGGATTTTATTTTAAAGGTCATCATCAACAAAAGGAACTCTTCCAGCATTGATAGATTGTTG  
TCCTTCAATTCCTTTGGCTTCCTTCTTACCCCAAATCACGAGATAGCAATGCAATATAATCTCCCTTCCTTGTCTCGTAATGAT  
GTTGCAATGTTGCATGCATAAGCAGCAGGTCATCAGGCCTAGAGTACTTTTTCATACGGATACTCTGAAACTAGACGGATACT  
TCCAGCAGCGCACTTTGATTAATTTGCCTTCTTGAAGCAGTTGATAAGTTTCTTTGCTATCTCTCAGGATACACATTATTATTAT  
TATTATCTCTCTCTGAGTTTTACGTAAATAAAAACAGCAAGCAGTTAGTTCACGTTCCGGAGCATTTCAGTCATTACAATGG  
CAGCAAACATGTGCTGGTACAAAACGATCCACAAGTACATAAGCTTTGTTTGGCAAGGTTACAGCTCTAAGCTCCACAAAAGT  
AGTTTTAAGCCTGTTTTAGTCCACACAAGATGGTTCATCCAAAACACCATCATGTGCCTCAGCTCTATGCTCTGCCAAACATGCT  
GTACTCAGCTTTATGATCTTGCCAAACATGCTGTACTAACTACTAAAAGTACAGGAATCAAAACCGAATCAATGATGCTGGAATA  
ACTTGTGGTCCATTTTTTATGACCTACCTCTGATCACATTTTTTATATCAGCTGTCACAATGTCACCTCTGTGAAACTGTA  
TTCTTTAATTATTTCTGAAATGTCATCAATTAGCACTTTTTAGCTCTATGTCATTGCCATCCTGTGTGTTAGATCAGTAAACAA  
TATGTGTTCTTAAAATAATTTGTCATGTCAGATGTTGTATGGTGCATGTCACATTCACACCAATTGAATAGTATCTCATCT  
CTTGCTATAAATGTTTGAATGTTGGATACGAATGAAAAGATTAGAAAGAACGTTGCATAAACGCTAGCACACAAATGCTTTA  
TATCAGGTACATATGCACAATATTAGTTTATGCGCGCACCTGCTTGGTGCATGGTATAAATTAGGTAACAGATCATGGTTATATTA  
GGCAACAAATAAATATTTTATTCATGCATGCTATCTTTCCAAAAGCATGATTAGTTTGGAGCCTACTAGTTTGGAGCACCTT  
AAAATTTTCCATGTGCTCAGGGTTAGGCATTAACACAAAAGTATTGATTGATGATCTCCTAGTCAATTTAAGTTTGTCTTGT  
GCTCTTTCTTTTTTAAATAACCAACCAAAAAAAATCTCAATGTGCTGTTGGAGGCAGAGCCAAGTTTTTAAAGATCTGTTCC  
AGGACATAAATCTATTTGGTTTTCAGGATATGGCTTGGTCCAAAACATTTGAAACCAGATTGCCACTTTAATTGACTTCTTT  
TGTAAGCCGAGGAAAACTATGGAACATCTTTTCTCTCAGCTCATGTTGATCCAGTGTGGTCCCTTTGTAGCTGCTAACT  
TGACTTTTTTCTTTGTGTCAGATTACAATTTGAACTGCTAGCAATGGGACCCAATTGTTTCTTCATCTTGA

>SsLRRL-RLK170

ATGTTGGCCGTTGTTGCTGGGCACTTTGTTCTCAGGCCATTTGCCGAGTGTTTGTCTGTGCGGTTCATCTATACTGCAAAGCATT  
TAAAAGGTTAGGTTTTGAGTTGTGCTATTACAGTGTTGGGTAATTTTTGTAATCCAGAGTGCTTGTAAATGTTGATGTACCC  
AGCTATCATATAATATAATTCTTCTTCGTCGCAAAAAAATTTATATAGGAGCTAATGTAATTAATGATTAATAATATGT  
TAACGTGCTAATTAACCTGCTATTGCTGGTGCCACGGGATTTTATTTTAAAGGTCATCATCAACAAAAGGAACTCTTCCAGCT  
TTGATAGATTTTGCTTCAATTCCTCTGGCTTCTTCTTACCCCAAATCACGAGATAGCAATGCAATATAATCTCCCTTCCT  
TGCTCGTAATGATGTTGCAATGTTGCATGCATAAGCAGCAGGTCATCAGGCCTAGAGTACTTTTTTCATACGGATACTCTGAAA  
CTAGACGGATACTTCCAGCAGCGCACTTTGATTAATTTGCCTTCTTGAAGCAGTTGATAAGTTTCTTTGCTATCTCTCAGGATA  
CACATTATTATTATTATTATTATTATTATTATTATTATTATTATTATTATTATTATTATTATTATTATTATTATTATTATTATT  
TTATTATTATTATTATTATTATTATTATTATTATTATTATTATTATTATTATTATTATTATTATTATTATTATTATTATTATT  
TATTATTATTATCTCTCTCTGAGTTTTACGTAAATAAAAACAGCAAGCAGTTAGTTCACGTTCCGGAGCATTTCAGTCATTAC  
AATGGCAGCAACATGTGCTGGTACAAAACGATCCACAAGTACATAAGCTTTGTTTGGCAAGGTTACAGCTCTAAGCTCCAC  
AAAGTACTTTTAAAGCCTGTTTATGTCACACAAGATGGTTCATTAACACACCATCATGTGCTCAGCTCTATGCTTGCCAAAC  
ATGCTGTACTCAGCTTTATGATCTGCCAAACATGCTGTACTAACTACTAAAAGTACAGGAATCAAAACCAGTAACATGATGCT  
GAATAACTTGTGGTCCATTTTTTATGACCTACCTCTGATCACATTTTTTTATATCAGCTGTACAAATGTCACCTCTCTGTGAA  
ACTGTATTTCTTAATTTTCTGAAATGTCATCCAATTAGCACTTTTATGCTCTATGTCAATTGCCATCCTGTGTGTTAGATCAGT  
AAACAATATGTGTTCTTAAATAAATTTGTCATGTCCAGATGTTGTATGGTGCATGTCACATTCACACCAATTGAATTAGTAGTAT  
CTCATCTCTTGTCTATAAATGTTTGAATGTTGGATACGAATGAAAAGATTAGAAAGAACGTTGCATAAACGCTAGCACACAAA  
TGCTTTATATCAGGTACATATGCACAATATTAGTTTATGCGCGCACCTGCTTGGTGCATGGTATAATTAGGTAACAGATCATGGT  
TATATTAGGCAACAAATAATTTTATTCATGCATGCTATCTTTCCAAAAGCATGATTAGTTTGGAGCCTACAGCTCTTGCGAG  
CACCTTAAATTTTCCATGTGTACTTCAGGGTTTAGGCATTAACACAAAAGTATGATTGATGATCTCCTAGTCAATTTAATTTTGT  
CTTTGTGCTCTTTCTTTTTTAAATAACCAACCAAAAAAATCTCAATGTGCTGTTGGAGGCAGAGCCAAGTTTTTAAAGATCT  
GTTCCAGGACATAAATCTATTTGGTTTTCAGGATATGGCTTGGTCCAAAACATTTGAAACCAGATTGCCACTTTAATTGAC  
TTCTTTTGTAAAGCCGAGGAAAACTATGGAACATCTTTTCTCTCAGCTCATGTTGATCCAGTGTGGTCCCTTTTGTAGCTG  
CTAACTTGACTTTTTTCTTTGTGTCAGATTACAATTTGAACTGCTAGCAA

>SsLRRL-RLK184

CAATATTTGCTACTACTACCTCTTTATTAGTTTGAGCGGACGCTATGAAATATAATGGCTCTCAACCAAGGCTAACCATCGAAT  
TGACATGGTGTGACTTTTTTTTTCTCCAGGATATGTATTGATATACGTTGCCGCTTTGATTGTTGGTCTTCTTCTCTGCCACT  
ACTTGAATGGAGAAGGCTATCAAATTAAGGTATTGACAATAGTTTCAGTTTCAGTTGTCGTCCTGTCTTTCGAATCTGTATAT  
ATAGTTAGGGCACTGCAAGCATACAGTTCTCGGAACTACAAAAGTTTGGACACTTTGTATATGTTGTGGGTTCCTTTTAAAGGC  
ACTCCCCCTACTCTAGGAGAAACAAAATTTAGCCCTAAATTTATATAGGAGCTAATGTAATTAATAATGATTAATAAGTTA  
ACTGTCTAATTAACCTGCTAATGCTGGTGCCACGGGATTTTATTTCCACGGAATTTTATTTAAGGTCATCATCAACAAAAGG  
AAACTCTTCCAGCTTTGATAGATTTTGTCTTCAATTCCTCTGGCTTCCTTCTTACCCCAAATCACGAGATAGCAATGCAATA  
TAATCTCCCCTTCTTGTCTGTAATGATGTTACAATGTGCATGCATAAGCAGCAGGTCATCAGGCCTAGAGTACTTTTTTATA  
CGGATACCTTGAAACTAGATGGATCTTCCAGCAGCGCACTTTGATTAATTTGCTTCTTGAAGCATGTGATAAGTTTCTTTG  
CTATCTCTCAGGATACACATTATTATTATTATTATCTCTCTCTGAGTTTTACGTAAATAAAAACAGCAAGCAGTTAGTTCACGT  
TCCGGAGCATTTTCACTTACAATGGCAGCAACATGTGCTGGTACAAAACGATCCACAAGTACATAAGCTTTGTTTGGCA  
AGGTTACAGCTCTAAGCTCCACAAAAGTAGTTTAAAGCCTGTTTATGTCACACAAGATGGTTCACTCCAAACACCATCATGTGC  
CTCAGCTCTATGCTCTGCCAAACATGCTGTACTCAGCTTTATGATCTGCCAAACATGCTGTACTAACTACTAAAGTACAGGA  
ATCAAAACCAGTAACATGATGCTGAATAACTTGTGGTCCATTTTTTATGACCTACCTCTGATCACATTTTTTATATCAGCTGT  
CACAATGCTACTCCTCTGTGAACTGTATCTTTAATTAATTTCTGAAATGTCATCCAATTAGCACTTTTATGCTCTATGTCAAT  
GCCATCCTGTGTGTAGATCAGTAAACAAATATGTGTTCTAAAATAAATTTGTCATGTCCAGATGTTGATGGTGCATGTCACATT  
CACACCAATTGAATTAGTAGTATCTCATCTCTTGTATATAATGTTTGAATGTTGGATACGAATGAAAAGATTAGAAAGAACGT  
TGCATAAACGCTAGCACACAAATGCTTTATATCAGGTACATATGCACAATATTAGTTTATGCGCGCACCTGCTTGGTGCATGGT  
ATAATTAGGTAACAGATCATGGTTATATTAGGCAACAAATAATTTTATTTTATGCTATCTTTTCCAAAAGCATGATTAG  
TTTGGAGCCTACTAGTTTGGAGCACCTTAAAATTTTCCATGTGTACTTCAGGGTTTAGGCATTAACACAAAAGTATGATTGAT  
GATCTCCTAGTCATTTAATTTTGTCTTTGTGCTCTTTCTTTTTTAAATAACCAACCAAAAAAATCTCAATGTGCTGTTGGAG  
CGAGAGCCAAGTTTTTAAAGATCTGTTCCAGGACATAAAGTATCTATTTGGTTTTCAGGATATGGCTTGGTCCAAAACATTTGA  
AACCAAGTTGCCACTTTCTTTTGAAGCCGAGGAAAACTATGGAACATCTTTTCTCTGAGCTCATGTTGATCCAGTGTGGTCCCTTTTGTAGCTG  
TCCAGTGTGGTCCCTTTTGTAGCTGCTAACTTGACTTTTTTCTTTGTGTCAGATTACAATTTGAACTGCTAGCAA

>SsLRRL-RLK250

TCCTCGGTCAAGCAAACTTTTCTTTCTTTTTTATTTCTTGGTGAAGTTGCAGAGTAGAATGGTTGTCCGTTATTCTACTGA  
TTTAGCATGTGTATACCAGCCCATCAAATCTTTCTCAAACCAGCAATCATATAGACCCTGCTTCGCACGAGGCGTGGCAAAT  
CCTGCTATATGGGTTGAGGCCTTACAAATAAGAGCTTTTCTGAGAAAAAACAGTCAGCAATTCACAAAACAGAAATATAT  
AATGACATGTTATTGCTTCAAGGTAAC TAGAAAGTACTCGTTCCAAGTTCTTTTATGTCATCAGCATCCATGTGTTCTTCATC

TGTTGGAGTCATTGATATTTTTCAGAACTGTGTTACCTGCGACAATTATTTTCGAGACCACCTGAACATCCACAACCTTTCTTTTA  
ACATTTTCTTTGCTTTTGGCAGGATACATTCAGCTTGTTCGCTCCTATTTGCTTGCCTGCTTCGCTACTGCTTTTGTGGATCTGATATA  
AAGAACTCATATGCTCTGAGGGATGAACCTCATCGAATCAAAAGCAATTCCTTTGGGACTGGTTTCGATACAGAAAACCTCTCCATG  
CATGTGGTCACATATCACTTGTGTGGACCATGCTGTTACAGCCATTGATTTGTCATATATGCCACTCCATGTTCCCTTTCCCATT  
TGCATCACGGCATTCCGGTCACTTGTTCGCTCTCAACTTAAGTAGGTGTGATTATTCGGTGAGATTCCAGAAAGCCTTGGGAAA  
TTTGACGCATCTCCAGTACCTGGACTTGAGCAGTAACCACTTACTGGGATCGTGCCTTACGCATTATATGATTGGAAGATGC  
TGAAAGAAATATGTTAGACAGAAACAGCTTGTCTGGACAATTGATCCCTGCCATTGCTAAGCTTCAGCGACTCGCTAAGTT  
AACCATATCCAAGAACAACATCTCTGGAGAACTTCTCCAGAGATGGGCAGTCTGAAGGACCTAGAGTCTCTGGACTTTCA  
CCAGAACTGCTTCAATGGATCAATACCAGAAGCATTAGGCAATCTGTCTCAGCTCTTCTACCTTGATGCAAGCAATAATCAGC  
TCACTGGATCAATATTTCCAGGAATGTGCACATTGTTGAACCTGCTGACGCTTGATTCTCTTCAAATGATTTGGCGGGGCCA  
ATACCTAAGGAGATTACTCGCCTGGAAAATCTAGAGCGCTTGGTTCTGCGGTCTAACAATTTCACTGGAAGCATTCCAAAGG  
AGATTGGTAACCTGAAGAAGCTAAGAAAGCTCATTCTCTCTAAATGCAACTTATCAGGCACCATCCCTTGGTCAATTGGTGG  
TCTTAAAGCCTACAGGAACCTTGATATATCAATAACAACCTTCAATTGGAACCTCCCAGCATCTATTGGTGAGCTGGGAAATC  
TGACTGTCCCTGATTGCAATGAGAGCAAAAGCTCATAGGCAGCATACCAAAAGAACTTGGTAACTGCAAGAAGCTTACTGTCTT  
GCATCTGTCTTCAATGCCTTCACTGGTTGATCCCAAGAACTTGCAGATTAGAAAGCTATTGTCCAGTTTGAAGGTGGATG  
GTAACAAACTGTCAGGTCAATTTCTGATTGGATTCAAACTGGGGAAATGTTGTATCTATAAGACTGGGAGGCAACAAGTT  
CAATGGTCTTACCTCTGGCATATGTCAAGCCAACCTCTCTTCAGTCACTTGACTTGCATTCTAACAACTTGACAGGAGTA  
TCAAGGAGACATTATAAGGTGCAGGAACCTTACTCAACTGAATTTGCAAGGCAACCATTTCCATGGAGAGATACCTGAATA  
CTTGGCGAGTTACCGCTTATAATTGCAATTGCGCTACAACAATTTTACAGGAGTCTTGCCTGCCAAGTTGTTTAATTCAITCA  
ACAATTTGGAGATAGATCTCAGCTATAATAAGCTCACTGGCTGTATTCTGAAAGCATTGGTGAGCTCTGCGGCTTGCAGAG  
GTTGCGGAT

>SsLRR-RLK204

ATTTGCATATGATAAGATGCTTACGACGAATGTTAGGTAAAGTAGTAAGTTATTTAAGCACCAATTGCATTGGAAGGATTAACG  
TTTTTTACAAGCGTTTAATGGTGTAGTAGCATTTGCTTCCCTAATTAAGCACAATATATCCAAGTATCTGTATTGTACGTGCTCT  
ATAGAATACTTTCAATAATATGCATGTAGTATATCTTTGTAGATATGGCTAGCTATTTGCATAATACACTAGAGATTATCGCTTAT  
GTTTAGGATTACAGGGAAGTGCTTGTAGTGGTACGTCATTAAGAGAAACATCTCCCATGTTATTGTGACTCTTACTAGGGGCGGA  
GCTAGAGAAAAAAAAGTGGATGCAACACTATATAGCTAGTGTAGTTGAAATATATATTGGAAAAACGAGAGCGGATAG  
TTTTTTTTGAGGGAAAAACCGTGGAGCATTGCTCCCCAGTGAATAATTAATAACAAACAAAGGAGTACAAACAGGAGTAAACAA  
AGGCATTAGCTGGCTGCTAACAACAAAAAAGAAACCTAAGGCTCACCTATTACAAGAAACTGAGACTAAGCACAGGAGCC  
ACCAGGGCAAGGTGAAAAAAAAGGATTACAACTATTGATCCAATTCACTACTAAACCACGCTCGGTAATAGGCAATCTGAA  
GAGATGAAGTTTAACCTTCACTTCTTAAAGAGCTGCTCCAGTTTTCAGAGACGCGTGGCTTGTAAATTGAAGATGAATGAAATCTTC  
TCTCCTTCCAAATACACCATGCACCAATCATGAAGAGATCCATGAAGTAAGGGCCACCAAGTTGGCATGCTGATGCTGTAG  
CATTTCAAAAATCGACACCTGCTGACTTTGCTGATCCCACTGTAAGCCAGTGGCGAACCACCTTGCAACACTTGAAGAGCA  
CTCAAAAGAAAAGATGCAAGGAGGTTTCATCTATCTGTTTATGACATAGAACACAATGGTATCCTTCTCAAGATGTTTATGTC  
TTCTTCTGAGAATATCTCTGGTGTTGAGCCTGTCAACCAGCAACAGCCAAAGCAAAAGAACTTTATTTTGGCATGCAATTTGCT  
TTCCAAATCCAGCACAGAGGAGTAGGTGGCACAATTTGCATGTAGTGGTGTCTGTAGTATCGACTAGAACTATAGAGACCTC  
CATTCCAATTACATACCCAAACATCTGTTTGGCTATTATCAATTCTGAGGGACTCTAACTCTTCTCTGAATACAGATACTCAAT  
ATTGATTTTACCAACCAACAATGCTTCCAAACACACAACAATGACAACAAGATGGATGTATATACCTTGCATGTAATAAAA  
TTTGGGCTTCCAAAAATACACAACAAACACAACAAGTATGGATAGGTAACCTTCTTGTAAATTTTGAAGTTGCAAAAACCAT  
TCTACTCTGCAACGGTTACTGTATGGGTGAGGCACTTACAAATATAGACCTGTCTGCCAAAACCGCTCCAGTGTTACTGTA  
GCAAAACCGCTGTCCAAAACCGCTCCAGGGTGTAGTTTGAACGGTTTTGAAAAGTTTCAAGGTGTAAAACAGACGCGTTTTA  
TAGTTTGGGTGTAGGTGTAGACACTAGTTGTATAGTTCAAGGAGTTAAGTAGACTTTTCTCTACTAATTTAGCATTTGTATAC  
CAGCCCATCAAAGATCCTTTCTCAAACCACGAATCATATAGACCTGCTTCCGACGAGGCGTCGCAAACTCTGCTATATGGGT  
TGAGGCACCTTACAAATAAGAGCTTTTCTGAGAAAATACAGTCAGCAATTCACAAACTAGAAATATATAATGACATGTTATTGC  
TTCTAAGGTAACCTGAAAAGTACTCGTTCCAAAGTTCTTTTATGCTACAGCATCCATGTGTTCTCTCATCTGTTGGAGTCAATTGAT  
ATTTTTCAGAACTGTGTTACCTGCACAATTATTTTCGAGACCACCTGAACATCCACAACCTTTTCTTTTAAACATTTTCTTTGCTTT  
TGGCAGGATAC

>SsLRR-RLK238

TCCTACAAATAAACACAAAGAGGTTTCAAGTTTGGACAGTATAGCAGGTTGCTGGGTTTCATACAAGAAAAGAAAGGCTTACTG  
TTATGCACCAGTTTTTTAAGAAAACAACAAAACAGTAACATTATATTTCCAGCTCTAGTATCGTAGTGTAAGAAAAGAAAGA  
AAGGTTTCAATGCACCATAGTATTAATTAGACGGAAAACAAGCAATTTTCGGCATAGTATAGAAAATTAGATGACAGGAGC  
GAATGGAATCCCACATGAATCTAATCAAAGATGACCAAGCAACAAACGCTCTAGCAGCATGAATGTATTTCTCCAATTG  
ACTCTCAATGTCAATGGCTGTGTCAAGGGTGCACATAACTGAGAAGAGACGGCTGGGCATAAGGCTTGTACCCATTGCTGT  
TATTGTCACTATGTCCCGCTCAGGCATTCTACAGCATCATCTCAGCCACTCCCTGAAAACAATACATTCAACTTAGATTTT  
CTTGACGGAAGGAAAAAATGGAGAACCAGACCTGTACATATAAACTAAGAAAGATAGTTTCAAGATCTAACAATTTAAATTTA  
AATCAATATAACAATTCAGATTGGTGGCTGCACATAGTCCGAGCAAAAGCAAACTCAACACGCGCCCATTTGTGTAGATT  
CAAATTCATCTTATGGGAATTTTGAAGATCCCTCAAAGGTTCTCAGAAATGCCATTGTGAAAATCTTTGTATACACTCAA  
GGCCATGCATAGCTATAAATATTTAGAAATGATAAATGACAGCAATGACACCAGCGCATGCAGGTCTGAATAAACAGGGCACC  
ACGTAACAACACCAGCAAGGCTCACAGGTTATATCCAACCAAAAGTCTACAGCTATGACACCAGCTAAGCAATCTACATGCA  
GCTCTGACTACACAAATTTAGAAATTTGCTTTCAAACAGTTTGTACACAAAAGGGGTTGCAACTGGACAGAAATAAACATTTT  
ACACATTGCCCATAGCCATATATTGTAGCAGTATGCTTTGGACAACATAACAGATAGCAAAAATATACATACCTGTGAAGCA  
GCACCTTAGATCAAACTCTTCTCCACACTCCATGAGGCTGTCCAACCTTTTATATGAATGTTTTTATCCCGTAAAGGTTTAAAT  
ATGCAATTTAAAAGGAGAAAAGCAGTAAATATAGATAGGTATGGAGCAACAAAGTCAAATGCACTCTTCAGTATACTCTCACATG  
ACGACACCAAGCATAACATCTAATCTCAGTATAGCATCACACATGTCCAATGGAACGCATTTGAGGGTTGACCACAATCAA  
ACCATCACAGCTGAAGGCATTTATTTGGTGACCAATGTGGTAGAGAAAACGTTCCAGGAAATTAATAATTCATGATTATAT  
CCTCACAGCAGATGAAGCATTTATTTAGCAACAGATCCTGGGACAGTTGGTACGGTCAAAAAGCAAGCTCCTAATTGAGATT  
TCTGATCTCGCACTTTGCCAGATATAGACAAAAAAGAAATTAAGATTGCAACTAAACAAATCGTGGATGTAGATAGAACAGC  
TAAATATCAACAGAGATTTTTTCCCTTTTGCTCTGTTATGATCTTGACAAACCTCTATTGTTGATGTTTAACTCTGAATTAGT  
ACAGATATGGGCACAAACAAAAGAAAACAGCCATGACTATGTTACATTACTGACAATTTGTTAGACTTAATTTGTTCAATTCT  
TCAAGGCCTCTGTACATGCTATACGATCCAAGAGTTAATTCCTCTGCCAACATCTACAGAGCAGACACAAATCGAAACA  
GAAGTGAGGCAAGGAGAAAAGAGCGGGGCACTGACCGTGAGCATGAGGACGCATGGCTTGGTGAGCCTGCCGAGCTTATTG  
AAGATGCCGCGGCCCTTGGCGATACGGATAGAGAAGGCCACTTCGTCACTACGCGCGCCGGACGCGCTGTTCGAGCCTGTC  
CGGGCCGCCAATTTGAGGA

>SsLRR-RLK264

CGGACGTGCGCAGACGCGGATGGTTGGCATGTGGCAATTCATTGCTGTATTGATAATTGATATACGGGGTAGTATGTGACAAGC  
CTGGACGATTACAGGTCGCTGTGTCACGGCTTCTGAGTTAAAGCATCACAAACAGGTACGATTTTCAGTCAATTTTCTGTGTTT  
ACTCCGTTCTGCTTTCGACGATTCAAGCTTTGACATCTCTTCTCTATCTATAACAGGATACAAGAGGAAACACAGCATCAA  
AAGAGTGTTAGACCGTCTCCAACGAGGTTGGCAAAACAGCGATGCAACGCAAAATGCGTTCTGCACAGGATTTTAGCCTTC  
AGAATCGTGCTCCAACAGAAAGACGTATACAGGCCACCCATTTTGCATCGCGCGTGAACCCAGAACGCAAAAACGCGTCCCT  
CTCTCTGCGACGCAATCTGGGTGAAGCCGCGCTCGGGGCCCTCTTCCCTCTCCCTCTCCCTTCTCTTCTCCACCCCACTC

CTTTTGGGCTAATGCTCTCCAAACAGGTGATCTAAAGTTAGCTCTAAATTTTAGCGATAATGCTTCTTATCAGACGCTCTGACAC  
GACATATGCACCTCTCTCCATCATCCGCGCTCTATTAAAAAAATAAACCGCATCATCCGCTCGCTCCCTCGCTCTCTCTCTC  
ACGCATCATCCGCTGGCTTGCTCGCTACTGCGCCGCCGCCGCTGCCGCGCTCCCTCCCTCCCTCCCGACCTCAATGCTAC  
CGCCGCGCCGCGCTAGCTGCTTGCCGCCGCCGCTGCCGCGCTCCCTCCCTCCCTCCCGACCTCAATGCTAC  
CCCACTCCCCGGGCAACCCAACCTCCCGCTCCCCCACC GGAGATGAGGACGACGGCGGCGGCTCCGACGAGATAGGTCGG  
TCCTCTCTGAATCTGAGCCCTCTCTCTTGATTGTGAGGACGCGCGCGGTGGCTAAGTTCCAGCGAGCTCTGGGTCTTAT  
TCCCTCTCCCTCTAGTGATCTTGAAGGTGATGGGCGACGGGACGTGAGCGACCTACACCTCAACCCATCATGTGTTGTTT  
GTACGCCCTTGCTATTGTCCATGTTGCAAGGGGAATTTGGGATGTTGCAATAAATGATTTCGAATGTTGTAATAGGTGATT

CATGTGTTACAGAAAGAAAGTTCTATTGTTGGGATTATATTTTTTCCTTAATGTTGCAACTTGTGAGTTTTAATTTTTTCTACGT  
GTCGTGACAAGCGAATTTAATCGTTGAAAAATTACCTTTTTCTCAAGGGAGTTTCATACAACGTCGACCCCAAGGCCGGAAGCGT  
ACGTGCACTCGGTGCGGCCGCCGCAATTTTTCTTCTCTTTTGTGTTCTCGCTGGCCCGCTGTCAAGTCCGGTCTCCCTCCCTCCCT  
GGCTGGTTGGCAGGCTCTTTTTACTGCTCGATCGGCCACCCATTTTTGTCTCTCAGTAGCTTGCCGTGATCAGCTATAGGAG  
TACGTATCTCCGTTTGCAAAAAAAAAAAAAAGGAGCAGCTATCTCCGTGTGACATGGGCAGACACATGGGCAGTGCATGTC  
TATTCGGGCGAGGATCTCGGTGGCAGCCGGCTGCGCCACTNNNNNNNNNNNNNNNNNNNNNNNNNNNNNNNNNNNNNNNNNNNN  
NNNNNNNNNNNNNNNNNNNNNNNNNNNNNNNNNNNNNNNNNNNNNNNNNNNNNNNNNNNNNNNNNNNNNNNNNNNNNNNNNN  
CGGGACCCGACGCGCGTGGGGAGCCACGCCCAGTGGCGCGTGGGGTGGCGCCGGCAGGTGAGCCGAGCCCGAGCGGG  
GCAGTCTCATTTTGCCGGATCGCTGCCTGTCTCTGTCCTCCCGCGTCCCCCAAATCTCTCGCTCCACGGCTCCAGCTCTG  
TTAATTACTACTAGTACTGCTGCCATTAACCTCCCGCGTCTTCTCTGTACGGGCGCACGTGCTCGCTTTTCGATCCCGCGC  
GGCGGTGCTGTCGTCGGGCTCCACCGCCGGGAGGTAGCCGTTGGGGGCGCGTGGCGACACCACGGCACAGGACAGGG  
TGCAGAACTCTGCGCTGAATGGGAAAGATCGGATTCTTTCCTGCCGCGCGGGACCCGCGATGTCAGCGCCCGCGTCCGTA  
ACGTATAGGACGAGCTGGGTTTTAAAACTCCAAATCGTCTCCCTCTGCAGAAGGACTGAGCTAGCCGTTAGTTAGCGCATC  
TGAGTTGAATCGGGTTAGCAGCTAAATTAATCCCTCCTTTTCCGTTCTTCTGCCATGTTCTGCAACGCTTATATAGAGCGCG  
GTACCATCGCTTTCCCGCTAGCAGAACCAGAAACCAAGAGAGCTCGCTCAAAAGTTCGAGCTCCTCCTAGATATAGGA  
GCGGTTGCGTTGGGCTAGGTACACTAGATTCTAGCTAGAGCTACTAGCTAGTTGCACTAGCCATGGGTGTGCGGAGCTGCAG  
AAGGAAGCAACAGCAATGTAGGGGTGGGGGCTTGCTC

>SsLRR-RLK9

AAAAAGTACGGCTCATAACACAAGCGAACAAGACTAAGATATAATACAAACAATGGTCCATCGCATGAGCAAAAACTGAA  
CAATATTGAATAGTGAATAACAGTGAGTACTGAATAATTTCAACTATCAAGTTCAGCCGTGAAGGCGGTGCGACACTACTC  
AACGATAGCTCAATCACTACAGATGTACATTTAACTAAACTAATGAGCCTACCTTATGTTGGAATAGGACCAAGGGTGCCTC  
ATTACCCGGCGGTGGCGGCTCCAGGAAGAAACGGCGGTGTGAAAAATAAAGTATGTTTAAAGTTGATAAAGTTGAAAAA  
ATCCAGTTCTATAATGAGGGAGAAAAATCAAACTACTTTAAAAATAAGATAAAGTGGGTTAAAAAGGACTTTGTGTAATCAGA  
CCTCTGAAAATCTGTGGCCACGTTTGTATCACCATAATCTCCCTTCTGATGAATCATTTTGTCTGGGGTCTACGCCCATATT  
ACCACGCCCAACTGTAGCGAGTTGTGGCAGCGCCACAAACGATGGCGGCAGAATCCATCGCCACAGAGTGTGGCAAGAAA  
TGAGAGTGACGGTGGTGTGGCTGTCTAAAAGTACGTGTGAATCAAACTACATCAGTAAATAATGGTGTGCCACAGATGGT  
GGCGTGGCGGAGCGTGGCTCTAATCCAAACAGCCCCGGCTATCTATGGTTGGAGAACTAGGCCCTCGTCTGCTCTGCCTGAA  
CCCCCTGCTGTGAAGTTTGGTACCGCTGCCATGTCTGCCCTGCACGTTGGTGCCATTCTTCTCAGAGCAAAATCTGGGA  
CTGACTGACTGAATTGACGCCCCAAATCTGAGCTCGACTACGGAGTTACGTACCCCGTCCCGGTGGCATCGGTGATGTGA  
CTTTGGCCTTCCCTTCTTCCCGCTCCACCACTGCCGGGAGCTGAGGCAGAGCCGCTGAGTCGCCGCTTTCGATTACCCCT  
TTTCTGCCCTCTTTTGAACCCATCCGTTGTTGGTGCGTGGGTATCAGCGCCTACCTGGCTATTGGCCGTTGGCGATGCAAGC  
CAGATGGCAGGCAGGTAAAAAACGCACAGTGAATGGATCAATGGAAGCATGGGCTGGTGGGCGCACGCGCCATCGCGCG  
ATGCGCGCCCTGTGCACATTCTCCAGTACACATCAGTGGCTGGA AAAACAAAATCTGAGCAAAATCCATCGGTTTTCCCGT  
TGCGAAACGACGTTTTCTCCCTGCGCCCGCGCGTGACGCGCGGGGACCCGACGCGCGTGGGAGCCACGCCCAGTGGCC  
CGCTGCGGGTGCGGCCGAGGTGAGCCGAGCCGAGCGGGCGAGTCTCATTTTGCCGGATCGCTGCCGTCTGCTGCTGCC  
CTCCCGCGTCCCCAAATCTCTCGCTCCACGGCTCCAGCTCTGGTTAATTACTACTAGTACTGCTGCCATTAACCTCCCGCGC  
TGCTTTCCATGTAGGGGCGACGTGCTCGCTTTCGATCCCCGCGCGCGGTGCTGTCCGTCCGGCTCCACCGCGGGGAG  
GTAGCGGTTGGGGCGGTGGCGACACCAGGCACAGGACAGGTACAGACTACAGAATCTGCTGCGCTGAATGGGAA  
AGATCGGATTCTTTCTGCCGCGCGGGACCCGCGATGTACGCGCCCGCTCCGTAACGTATAGGACGAGCTGGGTTTTAAAA  
ACTCAAATCGTCTCCCTCTGAGAAGGACTGAGCTAGCCGTTAGTTAGCGCATCTGAGTTGAATCGGGTTAGCAGCTAAAT  
TATTCCTCCTTTTCCGTTCTTCTGCCATGTTCTGCAACGCTTATATAGAGCGCGGTACCATCGCTTTCCCGCTAGCAGAA  
CCAGAAACAGAAAGAGCTCGCTCAAAAGTTCGAGCTCCTCCTAGATATAGGAGCGGTTGCGTGGGTAGGTACACTAG  
ATTCTAGCTAGAGCTACTAGCTAGTTGCACTAGCCA

>SsLRR-RLK358

AGTGTGGATGATAAAGTGCTTACCATGGTGATGAAGGAGGAACAAGGTGCAACCTTATAGAGCTCAAGGCAAAGGTATCAA  
TAGGGTTTTGCATTTTGGTGATCAAGACACCTAGAGGGCGTGATCACATTTAGGATCGATAACCGTACTATAAAGAGGGGAAT  
TTCTGGGGCTATTAATCACTTAAGTGCCACTAGATGAAGATTCATTTGCATATGCATTTAGATCTAGTGGAGAACTAACTTAAC  
GCCTCGAAAAATGTTTGTGAAAAATGCTAACACACTTGCACATGACATTGATCACTTGGTGGTGTTAGCACATTTGCGAAGGT  
GGTGAAGTTTGAGCGGTAGAGAGGGGTTAGGTTTCTCTCTCTCCCTCCCGCCGAGCTTGCAGAGGCGGGATTACGCGCTTTTCG  
GGAAATGAAACACCTATTTCCACTACGCCAGACGCGAAGAAACAGAGGCGAACGGAGGTACAGAGGTTGACCCGACGCT  
GAACCGGACGCTTCTCAGCGTAACCGGACGCGTCCGGTCAAGTGTACGCGGTCAACCTGGCGTGGAGCAAAAATCAGCGAA  
AACACATGATATTAACACTGCTACAATGGTCAAAGCGCTTTGCCATGCCGCGCCATCTCGCAACCGACATGTTGGGGA  
GTCTGGTGGCTGTCCAGTTTGTCAAAGTGGAGCTGAGGATATTAACACATGATATTTACATGCGAACGAGCAAAACAGTG  
TGGCGTTGCTGCGGAGTTGAAGAGAGGATGCAACGCTTGATCATGACTGATAGATCGGGCTCTGTAATCTTGAGGAAATAT  
TCTTAATGGAGGATCAAGTTCAGAACCTTGAGGTGGGGCTTGACAGAGCTAGTAATCACACCGCATGGTATATAGTGGGA  
ACGTGCGCAATTGGTCTGGAGAGCTGTCCAGCAGCGTCAAGGTCTGCCTTGGCTATTGCGGCGCTTACGAAGAATTAC  
AAGCTGGCGACCAAGAAAGCTTCAATTCTAAGGCAGTGATGGAAGAAACCCCAAGGGTAAAGTCATGGTGAATGTTGAT  
GCTGGTTTCGACGAAAATGGTGGTTGCGGCGAGTGTGGGCTCTATTATAAGAGATTGCTCGGGTGGAGTGTAGCAGCAGCCC  
ACGGTTTTGTACCACATCTTATTGATACCCGATGGCGGAGGCTTATGCGCTGAAAGAGGGATTGATGCTAGCGCAGCACATT  
GGGTGCAATCGAATTAATCATTCAGTCGGATTGCATGGAAGTGGTACAAATATGAAGGATGGAGGCGTCTCAGCAAAATCGG  
CGGCTGCAATATATGATGATTGCAATATCATATGGAGTGGTTTCATGATATTTCAATTGAACATTGTAGCAGGGAGGCGAATC  
AGGTGGCTCACAATCTAGCTAGAAGAGCTCGGCAATATAACAAAATTGTACTTGGGTCTATGAGCCCCCTAGCTTTATATTA  
CATCTTTGATGAACAATGTAACATATCTGAATGAATAAAGATTGTCGTATTGCTTAAAAAAAACCTGCTCGCGCTCCCGAGAA  
AGGAGCAGGGAGGCGGCCAGGTGGGCCTGCCATCGAGATATTCTCCCGACCCAGCCCAACCTGAGACTGGCCGATTGCG  
CCAGTCCAAGACCGCTGTTGGCCTGCTTCGGAACCTAGCCGTTGAAGAACAAGAAAAATAATAATTAACCGCCCTCCAAATCC  
TCGTGAGTGGCTGACTGACTGCTTCCCTCGCTCCCTAGTCCCTACTAGCCGTTGGCGCCCATTCCTCTCTCTCCCTCATCTTT  
CTTCTTCACAGAGTTTCGCACACCCTCTTCTTCTCCATTACCCGACGGCAGCAAACTCGACTGCTCTCCTCTCTCTCTCC  
TCTCCGTGCCATCTAGCTATTAGCTATTAGCTTTGCTTCTTAATCCCCAGCAAAACACTCCCCATTTCCCTTCAATTTCC  
CATCCCAACCATCACCCACCACCAC

>SsLRR-RLK298

GTTTAAAAAATGACAACCTTCAAATAGCATTTGGAACATACGTACCGACAAGTCGGAGTCTCATACGAATCGTGACGCGGT  
GAGGCATCCCGCGGAGGGTGCTCGTACGAGTCGGAGTCGGAGCACGCGTCGAGGTGTCCCGTCGAGCCGGCTCGTGCGA  
GTCCGAAACGAGTCGAGGTATATCGTCTGCTATTTTGGTCTTGCTGTGTTGCGCATTAGTGTTCGTTCTGCTTTAACCGT  
TGATTGTGGGTACCCTATATGGTACCGACAAGTGTCTCTTAAGTTTGATCTGCAACCTTAGGATTTTTTCTACCTT  
TATAAGGCACGGACATATTTTCTTGTAATGTATCAAAATTTACCGTGATTGTTGTTGGGGATACGGTGGGATGAGATGGT  
CCCCTCCGTGAATTGTGGGATAAGACCATTGCATCTCATATTTTGTGGTTCGAGATGTTCTAGTTCTTTGTTTCTTGGAGGGA  
CAAGCAGGAAAAAATGGACACTGTTCTGTGCAACGTTAACTATAGCAGTCAATTGGACCTATTGGCATTGTTTTCAGAAAC  
GTGACGAAGTTAAATGGTACATGGTTTTTGTTCAAAAAATGGTACATGGTTTTGACATCTCTCTTTTGTATATGATCAGGAT  
GTTTTGCCATCGTCAATTTATCATATATATACTCACACGCATACAGACCTTACCTTACCTTACCTTACCCATGAGCACTGACAGA  
AAAGTCTCTGCTAGCGTCTGGACGTTCCGATGGACACGCATGTTTGACGCCCCGAACATGCTGATGCACCTACCTCTGCTGT

GTTGCGCCCTGCGCCTCCTCTTGCTGCTGTTGCGCCCCATGCCGCCTCCTGCTACTCTTGCGCCTGCTCGGAGAGCCTCCGCC  
AAATTGAGAGGGGAGCATAGCGTGCTGCGAGTGTGAGAGAGAGACCAATAATTGAAACATACGTTTGTAAACATATGTGTA  
TAACCCACCGCAAAACATATAACACATCTAGATAAAAATATTGCAACATACGTTCTGAAACAGGTGAAACATTTAGAACATATACT  
TGCAACATACGTTGATAATCACTGCAACATATGCAACATGCAAAATGAAACACATGCAACATCTAGATGAAACAGCCGAAATAT  
TTGAAAAACATACTTGCACATACGTTGATAGTCACTACACATATGTTTGTAAACAGCTGAAACATGAAACATACACTCGCA  
ACATACGTTTATAATCATTGCAACATATGCAACACTAGATCTATTTTGTCAACGTCAGATGAAATGTATGCAACATACATCTA  
AAACGTCATGAAACACACAGTCGCAAGATGTGCTCATCTACTTGTGCTGCCGCCAACGAAGGCTCGTTGACGCGAGCGGGAGGC  
ACGAACGGGCACGCGGCACGAGGTGGAATGCCGACGCGACGAATAGGAAAGAGAAGCATCCATGTTTTTTCAATACCCT  
GTTGTCTCGTGCTTATCAGCGCTTATCAGTTAGCCATTAGCAGTATTTTTCTCTCACAATAAATCCGCATCAGCCAGAGTCAG  
CCAGCCAGAAGCCATCCTACGGGTAGAAAAGCATTACCGTTGTAGGAAAAATAAAACAAAACTAGAGAAGGTCGATTGGCT  
CTGCTCGGTGTCGTGTCGTGTCGTGTCGCCAAAGCCAAAACGCGTAAAGGAAGGGAGCATCAGGTTGTTCTATTTGTTGG  
ACGACGTGGGCCCAATACCTTGCTTAACAAACCGTTGCGGTTCCCGAGAAAGGAGCAGGGAAGCGGCCAGGTGGGCGCTGC  
AGACTGAGACATTCCTCCGACCCAGCCAAACCTGAGAGTGGCTGATTGGGCCAGTCCAAGAGCGCTGTTGTTGGCCTGGT  
TCGGAACTAGCCGTTGAAGAAGAAGAGAAATAATTAACCCGCCCTCCAAATCCTCGTGACCGCTGACTGCTTCCCTTCCTCC  
CTTTCTCCTACTAGCCGT

>SsLRR-RLK393

ACTCTGGTGCAATTGTTTACAAGAACAGTGTGGTGTTCCTCCGATGCTCACTAGGGTCTGACGCCCTTGCTCAGTTCGACA  
CCTGCTGATACCATGGCTAGGCTTAGCTCTTAGCCTATGGTCTGGTGCCCTTCTCAGTCTGACGCCCTACTAAATCCTCTTCC  
AATTTGTTTCTTATGGTCTCGCGTTCGGCTGGTTCCATCTTATGTCTTGGACCTTTGCATGTCTTGTGAGTCTCTCTTTTTCG  
TTCTAATGTCTCGCTTGAAGTGTGATCATCCAGATCACATCATTCGCTAAGTTTAAAGTTCACTTTTGCACCATTTGAACATAT  
CCAAAAACCACTAATAATGTTAAATGTTTATGTTGATCATCAAATACCAAAATCCAAACTAAATGGCCCATGGGG  
TCCATTTTCTTACAATCTCTCCCTTTTATGTGCTTGATGACAACACGACCAAAGCAAGCAATAATAGAAAAAATCAAAT  
GCAATCTACTTGTAGGATGCAATGCAAAGGCAAGATCATATGATGTAAAGATACTATTTGAAGTAAATAAGCGGTACTCA  
TCTTGCCCTCTCAATTTGTCCCTTGTGTGGTATTATGGCTTCTAAAGGAAACAAAGCATTTATGATGTTCTTCTTCTTAGG  
ACCATCTCCCAAAGTAGGATTCTCCCCATTTTATAATCTCCCATAGCCAAAACCCTTGTATGCTTGAAAATTTTGAATTT  
GTGATTTTGGTATTATATAGGTTGGGCTTGCTTTTGGTTGTACAAATCTCTCCCTTTGGAATCAAACACCGAAAAAGAAAA  
ACATTAGTAACCAAAAGATTGAATCTGGCTTGCTTTATCCCTTAGCGGATTCTATATAATAGCCTAGATTACGACCAACCGAT  
CTACGAATCCTAAGTAAATCAAACAAATAAACCAATAATGAAATCTAAACAAATCTAATCTGAAACAAACCAAACTTCT  
GCCGCTTATCCTAACCGAACAGCTTACTCCCTACGCCGCTCCTCTGATATGTGTTGCCAACCATAACACTGAACCATAACA  
CTGGAGGGAAGCTGTTTCAAGAATGGGCAACAAATCTAATAAAAAATATGCCAGGATTAAAAAACTTCAATGAAACAAA  
GGAGCATGACTGTTTAAATGATTGGCCTTCTAAAGGAAACAAAGCATTTATGATGTTCTATGTTCTTAAAGCTAGTATTGGCCT  
TCTAAAGGAAACAAAGCGTATGCAGGGGAGGCTTATCAGTATGCAAGGTGAGACGGGGCAAGCGCAGCATGCCGGG  
CGGACGCAGCAGGCGGGCAGACGCGGGCGTCTAGACAGGAACTAGCCACGCCGAAAAAGAACTAGAGAGGGTCGATT  
GGCTCGCTCGGTGTCGTGTCGCCAAAGCCAAAATTTGGTATAACGGAACGGAGCATCAGGTTCTATTTGTTGGACGCTGGG  
GATTGCGGTGAGCGCTGGGCCCAATACATCTAGTTACCAACCGTTGCGGCTCCCGAGAAAGGAGCAGGGAAGCGACAG  
GTGGGCTTGGCCATCGAGATATTCTCCCGACCCAGCCAACTGAGAGTGGCTGATTGGGCCAGTCCAAGACCGCTGTTG  
GCCTGCTTCGGAACTAGCGGTTGAAGAACAAGAAATAATAACAAACCGCCCTCAAATCCTCGTGAGTGGCTGACTGCTT  
CCCGCGTGACGCGTGAGGCCACCCAGCTGCCCTTTCTGCTTCTTCACTCCCTAGTCCCTACTAGCCGTGGCGCCCATTC  
CTCTCTCCCTCATCTTTCTTCTTACAGAGCTTCGCACACCGCAGGCAGCAATCTCGACTGCTCTCTTCTCTCTCTCTC  
TCCGTGCGCATCTATTACCTTTGATTCTAATCCCCAGCAAAACACTCCCCATTCTCCCTTCAATTTCCATCCCAACCATC  
ACCCACCACCACA

>SsLRR-RLK381

GATGATTTTGGCCTTCTAAAGGAAACAAAGCATTATGTAGTTCTATGTGTTAAGCTAGTAAAGTGAATACATCAACTGCTTG  
CAGCAGGAATCTTCCATAGAAGTTTATTGACAGTACTACTATTTCTATAAGCAAGATAGATGCGATAGTCATACAGGTCAATA  
ATTTGATAGAATTAAGATACATGAATGATAATATCTTAGTCTTGTAGGAGAGACATTTAATGAAATAATACACAGCAACA  
ACCTTTAAGGTTTCAAAGTGTGCTAATGGAGCTACCCATTACATGCAAGATGGTTCAACTTTATTTTAGGTTTGAAGTGTGCT  
TGAAAAAGAAAGCACCATACAGTATACTATACTTACATGATAGCTAGGCAACAAGAATATGTTTAGCTTTCTCGCTATTTAAA  
ATCTGTTTTAAAGCACACCATATAAAGAATTGTGTGCCGTGAGTTTAGCAACCAGAAAAAGAAAAAATGATGCATGCTT  
CAATCAACTCATGATTTTGTATCGGTTTCACTTCTCTCATTTGTTAGCTGCATGAGATGATGAGTCTGTTTCAAAAAGGTGCT  
AGAGAAGCCCTTATACCTTACCTATGAGCGGTTAGAGAAAAAAGGTAATGCTTGGTTGAGGGCGTCTGTTTGACCAGACGG  
ACTGACTCATGCTCGTGACGACCAGAAAAAAGAGGGCGCTGCATCGGTCTTTTGCAGGGTAGCGGTGGGAGTGCA  
TGTGGCCACTCTGCTCAGTGTGGGGTGCATGTGGCGACGGGAGTGCATGGGAGCAGCTGCGCCATTCTTGGGCGT  
AGGGTGACATGCCGCGCTGGGGGCGTGCATGCCCTGTGACCACAGAGAGAAGGACCGGTGTTGGCAGTTTGCAGAGAGA  
GCGCATGGCCGCGCATGTCATGTGTCATTTGTTGCTCTCGTGACGGTTGAGCGTCAGCGGCTAAGTGTGCGCCAAATTTTTC  
TGCCACTCCATGGCATTGAGCCCATATGTGTTGTGCGGTTTCAGATGTACGTTTCAATATGTTTCACTAGATGTTGATCGGTTT  
CATCTGGATGTTGCTATAGCAACCGTTATATACGTAAGTGTATATCTCATCTGTTTTCAGATATATGTTGTAAGTGACGTTGCA  
TATTTAAGTGGCTATACACATATGTTGCAACGTTTATTTAAAGTGTTCATCGGTTTCAAACATATATTGCAAGTGTTTTATCT  
GGATGTTGCATATGTTGCAATTGATATATATGTTGCAAAATATTTCACTGTTTTCAGACATATATTGCAAGAAATCTTCAGGTT  
GCAACATCAATAGGCACAAGAAGCGGGCAGCATGCAATACGGTCCCTACGAACACAGCGGTCCCACGTGCGTGCGTGACA  
AGCAAAAGCGGCATGGAGGACGCGGCGACCCAGCAGAAATCGATTGGCTCCGCTCGGTGTCGTGCGCGCCAAAGCCAAAAT  
TTGCATAACGGAACGGAGCATCAGGTTCTATTTGTTGGACGCTGGGGATTGGCGTGGAGCCGTGGGCCCAATACATCTAGTT  
TACCAACCGTTGCGGCTCCCGAGAAAGGAGCAAGGAGCGGCTGGTGGGCTGCCATCGAGATATTCTCCCCGACCCAG  
CCCAACCTGAGAGTGGCCAGTCCAAGACCGCTGTTGGCCTGCTTCGGAACGAACCTAGCCGTTGAAGGACAGAAAAATAATA  
TTAAACCGCCCTCAAATCCTCGTGAGTGGCTCACTGACTGCTTCCCTCACTCCCTAGTCCCTACTAGCCGTTGGCGCCCAT  
CCTCTCTCCCTCTTCTTCTTCTTACAGAGCTTCGCACACCGCAGGCAGCAATCTCGACTGCTCTCTTCTCTCTCTCTC  
CTCTCTCCGTGCGCATCTATTAGCTTTGATTCTAATCCCCAGCAAAACACTCCCCATTCTCCCTTCAATTTCCATCCCA  
ACCATCACCCACCACCAC

>SsLRR-RLK290

CATCCATATATTAATAAATTTTAGTAGCAATATCAGTGTCTTATTAAGTTTGTATCTGCAACCTTGAGGTAATTTTTTCTACCT  
TTATAAGGCACGGACATATTTTCTGTGAATGTATCATAAATTTACCGTGATTTGGTTTGGGGATACGGTGGGATGAGATGG  
TCCCGTCCGTGAATTTGTTGGGATAAGACCATGTCATCTCATATTTTGTGGTTCGAGATGTTCTAGTTCTTGTGTTTCAATGGAGGG  
ACAAGCAGGAAAAATGGACACTGTTCTGTGCACCGTTAACTATAGCAGTCAATTGGACCTATTGTCATTGTTTGACAAA  
CGTGACGATGTTAAATGGTACATGGTTTTGTTTTCAAAAAATGGCACATGGTTTTGACATCTCTCTTTTGGTATATGATCAGG  
ATGTTTCGCGATCGTCAATTTACGTATACACTCACGCGCATACAGACCTTACCTTACCTTACCTTACCTTACCTTACCTTACCTA  
TGAGCACTTACAGAAAGGGTCTGCTAGCGCCTGGACGTTTCGGATGGACACGTCATGTTTCGGACGCGCCGAACATGCTGATGC  
GCCTACCCTCGTGCTGTTGCGCCTGCGCCTCCTTGTGCTGTTGCGCCCCATGCCGCTCTGCTACTCTTGGCGCTGTT  
CGGAGAGCCTCCGCCAAATTGAGAGGGAGCATAGCGGCTGCTTCCCAATGCAAGACAGAGAGAGCATAGCATGCGTGCGG  
CAGTGTGAAAGAGAGACCAATATGAGAGAGAGACCAGTAATTGAAACATACATTTGTAATATATGTGTATAACCACCGCAAA  
CATATGCAACATCTAGATAAAATATTGCAACATACGCTCTGAAACAGGTGAAAGATTGAAACATATACCTTGAACATACGCTG  
TATAATCACTGCAACATATGCAACATGCAAAATGAAACACATGCAACATCCAGATGAAACTGTGAAATATTGAAACATACT



TGCAACATGCGTGTATAGTCACTACAACATATGTTTGAACAGCTGAAACATGAAAACATACACTACAACATACGTTTATAA  
TCATTGCAACATATGCAACACTAGATCTATTTTTGCAACCGCTGAGATGAAACGATGCAACATACATCTAAACGCATGAAAC  
ACACAGTGTGCAAGATGTGCTCATCTACTTGTGCGCGCCAGTGAAGGCTCCTTGACGCAGCGGGAGGCACGAACCGGCACG  
GGCAGCAGGTGGAATGCCGACGCGGACGAATAGTAAAGAGAAGCATCCATGTTTTTTTCAATCACCTGTTCGCTCGTGCTT  
ATCAGCCAGCCATTACGCTATATTTTTCTCTCATAATAAATTTGCATCAGCCAGAGTCAAGCCAGAACGCAACCGG  
GTAAATAAAAAATGGCGGGTAGAAAGCATTACCGTTGTAGAAAAATAAAACAAAAACCAGAGAAGGTCGATTGGCTCTGCTC  
GGTGTGCTGTGCTGTGCGCCAAAGCCAAAACGCGTAACCGGAACGGAGCATCAGGTTGTTCTATTTTGGTGGACGCGCTGGGC  
CCAATACCTTGTCTTAACAACCGTTGCGGTTCCCGAGAAAGGAGCAGGGAAGCGGCCAGGTGGGCTGCGGACCGAGACA  
TTCCCCGACCCAGCCAAACCTGAGAGTGGCTGATTGGGCCAGTCCAAGAGCGCTGTTGTTGGCCTGGTTCGGAACCTAGC  
CGTTGAAGAAGAGAAATAATTAACCCACCTCCAATCTCTGTGACCGCTCAGTGCTGGCTGACTGCTTCCCTACTAGCCGT  
TGGCGCCCATCTCCCTCCCTCCCTCCCTCATCTTCTTACAGAGCTACTAGGCACACTTGCAGGCAGCAATCTCTACTGCTC  
TCCTTCTCTCTCTCTCCGTCGCGGACCTCACTAGCTCGCTTGTCTCATAATCCCCCAGCATTCCCTTCCATTTTCATCCCA  
AATCATCACCCACCACCAC

>SsLRR-RLK275

GCGCATTAGTGTTTTCGTTCTGCTTAACCGTTGATTGTGGGTACCTATACTATTAGTACCGACAAGTGCTCTATTAAAGTTTGT  
ATCTGCAACCTTGAGGTATTTTTTCTACCTTTATAAGGCACGGACATATTTTTCTTGTGAATGTATCATAAATTTACCGTGTAT  
TTGGTTTGGGGATACCGTGGATGAGATGGTCCCGTCCGTGAATTGTGGGATAAGACCAATTGCATCTCATATTTTGTGCTG  
AGATGTTCTAGTTCCTTTGTTTCATTGGAGGGACAAGCAGGAAAAAATGGACACTGTTCTGTGCACCGTTAACCTATAGCGGT  
CATTGGACCTATTTGCCATTGTTTTGACAAACGTGACGAAGTTAAATGGTACATGGTTTTGTTTCAAAAAATGGTACATGGT  
TTTGACATCCTCCTTTTTGGTATATGATCAGGATGTTTTGCCATCGTCATTTTATCATATATATACTACACGCATACAGACCTTA  
CTTACCTTACCTTACCCATGAGCACTGACAGAAAAAGGTCCTGTAGCGCCTGGACGTTCCGGATGGACACGCATATTTGGAC  
GCCGAACATGCTGATGACCTACCTCGTGCTGTTGCGCCCTGTGCCTCCTCTGTCTGCTGTTGCGCCCCATGCCGCTCCT  
GCTACTCTTGGCGCTGCTCGGAGAGCCTCCGCCAAATTGAGAGGGAGCATAGCGTGCGTGTGCGCAGTGCGAGAGAGAGACC  
AATAATTGAAACATGCTTTATAACATATGTGTATAACCACCGCAAAACATATAACAACATCTAGATAAAATATTTGCAACATACG  
CTGAAAACAGGTGAAACATTTAGAACATATACTTGCACATACGTGTATAATCACTGCAACATATGCAACATGCAATGAAACA  
CATGCAACATCTAGATGAAACAGCCGAAATATTTGAAAACATACTTGCAACATACGTGTATAGTCACTACAAACATATAITTTGA  
AACAGCTGAAACATGAAACATACACTCGCAACATACGTTTATAATCATTGCAACATATGCAACACTAGATCTATTTTTGCAA  
CGTCCAGATGAAACGTGTGCAACATACATCTAAAACGCATGAAACACACAGTCGCAAGATGTGCTCATCTACTTCCGCGC  
CCAACGAAGGCTCGTTGACGCAGCGGGAGGCACGAACGGCACGCGGCACGAGGTGGAATGCCGCAGCGGACGAATAGGA  
AAGAGAAGCATCATGTTTTTTCAATCACCTGTTGCCTCGTGCTTATCAGCGCTTATCAGCGCTTATCAGTCAGCCATTAG  
CAGTATTTTTCTCTACAATAAATCCGCATCAGCCAGAGTCAGGCAGCCAGAAGCCATCCTACGGGTAGAAAGCATTCCTG  
TGTAGGAAAAATAAAACAAAACTAGAGAAGGTCGATTGGCTCTGCTCGGTGTCGTGTCGTGTCGCGCCAAAGCCAAAACGCG  
GTAACGGAACGGAGCATCAGGTTGTTCTATTTGGTGGACCAATACCTTGCTCTAACAACCGTTGCGGTTCCCGAGAAAGGAG  
CAGGGAAGCGGCCAGGTGGGCTGCGGACCGAGACATTCCCGACCCAGCCCAAGCCCTGAGAGTGGCTGATTGGGCCAG  
TCCAAGAGCGCTGTTGTTGGCCTGGTTCCGAACTAGCCGTTGAAGAAGAGAAATAATTAACCCGACCTCAAATCTCTGCT  
ACCGCTGACTGCTTCCCTTCTCCCGCGCTGCAGGCCACCCACGCTGCCTCCTCCTCCTTTTCTCCCTACTAGCCGTTGGC  
GCCATTCTCTCCCTCCCTCATCTTCTTACAGAGCTACTAGGCACACTTGCAGGCAGCAATCTCTACTGCTCTCCTTCTC  
CTCCCTCTCCGTCGCGGAGCTCGCTGAGCTCGCTTATGCTCATAAACCCCTGACGATTCCTTCCATTTTCATCCCAATC  
ATCACCCACCACCAC

>SsLRR-RLK431

ATTCCCGAACATACGAAGGGCCAGAGAAGAACTTCATTCCAACAGAGAAATATGTTGTGGCTGTAGTCTAACGGCACTAA  
TTGCTGTGACGATGAAACAGTTCATGCACTAATCTGCAATTGGAATAGGATAGAAGCAAGAAAAATATGAATCGAAGGTTTT  
GAGTATGAAATTAAGAACGAAGAAAAATGATGAGAGATCAAGGGGGAGAATGTTAGGTTTTGATCTCCCACCATTAGGCCC  
AACGGCTTTTTGGGCTTGCTTCTCGCGCCCTGATCGGGGGCGCCCAACCTTATATGGTTGGTGGGCCCCGCTACACTGCG  
CCATAATAGAGGTGGGGGGCGCGCGCTCGAGATACGAGGTTCACTTACCTTAGCCGCCACTCCCCACCGACATTCCTGATCTGT  
GAAGGGCGCAGCCAGTGATGGGAAGTCGCCACCGTCTCCACCGACCGTCGCTGCTAGCGCATAGATGGCACCAGCGAACG  
AGACGCGCGCCCTGCTCCGACCACTGCTGTCAACGATGGTTTGCATCCCATACTCTACGTATCCCTTTTCAACCCCTCTATG  
TCTTTGTAGTTCATGTATTAGGACTTGTGTATATACTGTAAATCACTGTTTGGTTATTTCTATGACGAATGCACCCGATCTAAT  
GAATCTGTGAACATCGAAAACTATCACTTTTGAGTCTAGTTAGTCCATGGTTAGACAAAATTTTACCAATATAACGAAAGTG  
CTACGAGAATTTTTTCTCAAAAATTTCCGATGTAAACGAGGCTGTGTATGAAAGCGGCAGGCAGCTGCCAGACGTAGCA  
TTAGCATGACGCGTTGAAGGATGTAAACGAGGCTGTGTATGAAAGCGGCAGGCAGCTGCCAGACGTAGCATAGCATGC  
AGCGTTGAAGTGTATGAATGAATGAAGTGTCCGTTTCTGTCCAAAGATTAGTTTTTTAAAGGAGACGGCAGAGAG  
ACGACCAGCACCCCGTCCGGTACAGTACCAAACTCGAGACCGCGATTAACCGAAAAAGAGCGCTCGACGTGTACACGT  
ACACCCGTCACTTTCGTTTTTCTGCATCAACGACCTCTTCGCTTGGCTACTTTTCAGTTACGGAACATCGTCTTCTCTCTC  
GTACCATTTTCAGTATAAATATCTGTATAAACTAAATTTACGCGTAAGGGATGACCAGACAACGACCTAATATCTACAACAAA  
ATCCCTTATCGTCTCGTCCCAACCGGACCCAACTCAAAAGCATCGCGCGGCCGCGGCCGCGGCGGCGGCGGCGGCGG  
AGCCGAGCCGACCGACCGGAGGCGGAGGGCTGGGCTGAGCACGCACGCGCGGTCGAGGCTCAGCGTACGCTTTACGA  
TGCCATGATCCACGCCAGCACGCGACGGCCTGGACCTCGAGGCTCGAGCACAGCTGCTGCTCTACTCGACTTGGCTGCTA  
CTGCATCCATCCATGGAGACGGACCGAGCTGTCTGTCCCTCGGTAGTTCGGTAGGGAAGCGGAGCGGAGGTGAGAGGCGAC  
AACGACCTGTGTACTGCATGCCGGCTGCCGTCCGGGCTCCCAAACTCGAAAATTCATAGCGGCGGGCGTGGAAATCTGAG  
CCTCGGCGGGGACGCGAGCTCAAAACCGGGACGGCTCGGCTTCCAGTTCCACACCCCTTGCAGCCACGCGGCCAC  
CCACCCGGCGCATCGCTTCTTTATTCGCTCCACTACCCAGGCTCACATGCCATTGCCAACCTCTCTCACTGCTCGCACCG  
CCTTCCACCTGCTGCTCTGAGCCCTGACCGCGAGGGCGCGGAGCTACCAAAAGGAACCCGCGCGGGCGG  
GAGCGGTCAACGCTGCTCTGCAGCCGAGGAAGCTAGGAACCAAGGAGGAGGAGGACCGACCGAGGACGGACATGC  
TGCGCGCGCGCTGGGCGCTAGGAAGCTCGCCGACGCGCAA

>SsLRR-RLK421

CAACACCTAACTGAAGGGACACGGGAACAGGAGCTAGCAAAGCAAAACCGTAGCAATGCAAAGCTGCGGCGTGCGTGCAT  
GGGCACATGTGCGTGGGTGGCCACCATCACACACTGGTTTGGTTGGCATATGTATGCATGCATGCATCAAGATTTCGATC  
TCCTGGCCTTTTCGCTCTCAACTCCTTTTTACACTAGAGCATTTGTTGTACAGTAACGTGACAACCGGATTTTCTCTTCCGG  
GGGACCAAGTATCAAGGTTTATGGAGAAATCGTCTCGCATTTAGTCAAGGCGATCATCCATCATCATGCAATTTATTCAG  
AGGTCCCCAATGCGAGCCTAACAGGTCTCTCTGTAACTGTTCCGGTGTATGATTTTTCCGGCTAATGTTTTGTATTAGA  
GAAAAACACAGTACCATGACTGATAAGTCCAGTAAACAGGGTTGTCTTGTGTTGATCTATCGTCTGCTGGCCAGGTATATA  
CGATGTTATATTACTGTTGTACTTTTATATCTAGTTTTATTAATAAAAAAATGCCCGGTAGGAGGAGGGTAGCGCGAAGTGTAC  
TGTGTATGAAAGCGGCAGGCAGCTGCCAGACGTAGCATTAGCATGCAGCGTTGAAGTAGAGTATGAATGAAGTGTCCGTTT  
CCTGTCCAAAAGATTAGTTTTTTAAAGGAGACGGCGGACGAGAGACGACCAGCACCCCGTCCGGTACAGTACCAAACTCG  
AGCGCCGATGCTGACTGAAAAAGAGCGCTGACGCTGACACCGCTCACTTTCGTTTTTTCCGCGACGCGCTGTT  
GGCTTGAGTACTTTTTAGTTACGAAATAGTGTCTTCTCGCAATATTTCAACATAAGCATCAGCATATAAGGCTTGTGTT  
TAGTTCTTACCCAAAAAATTTACAGGCCATCCCATCGAATGTTTAAACACATGCATAAAGCATTAATATAGATAAAAAATAAC  
TAATTACACAATTTACATATATTTAGCATGCGAATCTTTAAGCCTAATTAGTCCATGATTAACACTAATTGCTATAGTTATAT  
ATGTGCTACAGTACCTCTAAACCTTTATAGCCCTGAAACACGCGCTGAATTTACGCGTAAACCAACAGGGTGAGCACCCG

CGCACACACACATGGTAAGACAACGACCGCGTAGTAATATCCACGAACTAATCCGTTATCCGTCCGTCCCCAACCGCGAC  
CCAAGTCAAAGCATCGCGCGGCCGCGCGCGCGCGCGGCGATGGAGACCCGAGCCGAGCCGACCGGAGGCGGAGG  
GCCTGGGCTGGGCACGCACGGCAGGTGACGGCTACGGCTTACGATGCCATGATCCACGCCACCCACGCGACGGC  
CTGGACCTCGAGCACAGCTGCTGCTCTACTCGACTTGCCTGCTACTGCATCCATCCATGGAGACGGACCGAGCTGTCTGTC  
CCCTCGGTAGTCTGGTAGGGAAGCGGAGCGGAGGTGAGAGGCGACAAACGACGTGTGTACTGCATGCCGTCTGCCGTCCGGG  
CCCCAACTCGAAAATTCATAGCGGGCGGGCGTGAATCTGAGCCTCGGCCGGGCAGCGAGCTCAAAACCGGGGAGGT  
TTACAGGTTTACGGCCTCGGCTTCCCAGTTCCCACACCCCTTGACGCCACGCGGCCACCCACCCGGCGCATCGCTTCTTTA  
TTCCGCTCCACTACCCCGCCCCGCCAGCCTCACATGCCATTGCCAACCTCTCCTCACTGCTCGCACCGCCTCTCCACCTGCT  
GCTGCTGCTCCTGAGCCCTGACC CGAGGGGAGGGCGCGGAGCTACCAAAAGGAACCCGCGCGGGGCGGGAGCGGTCAA  
CGCCTGCTCTGCAGCGAGGAAGCTAGGAACCAAGGAGGAGGACCGACGACCGAGGACGGACATGCTGGCGCCGGC  
GCTGGGCGTCTAGGAAGCTCGCCGACGCGCAA  
>SsLRR-RLK430  
AAGATCAAGATGGAATAGTAGTAAGGAACAAAGCAAGACTAGTGGCTAAGGTTACACACAAATAGAGGGTCTTGACTTTGG  
TGAAACTTATGCCCGGTTGCAAGATTGGAAGCAATTAGGATCTTACTTGCTATGCTTGTGCTCATAATATCAAGCTATATCA  
AATGGATGTGAAGAGTGCATTTCTCAATGGGTACATTCAAGAGGAGGTGTATGTGGAGCAACCTCCCGGTTTAAAGATGACA  
AGAAACCCAATCATGTCTACAAATTGAGAAAGCTTTGTATGGATTGAAGCAAGCACCTAGAGCATGGTATGAAAGATTGAGG  
GACTTCTTGCTAACCAAGGATTGTCTATGGGAAGTGTCTCTTCAACGAAGATTGGGAAAGCTGTTTGT  
GTTGCAATATATGTTGATGATATCATCTTCGGTTCAACCAATCAAGATTATTGTGATGAGTTTGGGAAAATGATGGCAAAAG  
AATTTGAAATGTCAATGATTGGTGAACCTTAGTTTCTTTCTTGGACTTCAAATCAAACAAATGAAGGAAGGAACATTTGTGAG  
CCAAACCAAGTACATCAAGATATGCTCAAAAGTTTGGCATGGAGATGCAAAGGGCATTACAACTCCAATGGGCACTAGTG  
GAAGTTTGGATAGGACAAGAGTGGGCAACATGGTGGATCAAAAGCNNNNNNNNNNNNNNNNNNNNNNNNNNNNNNNNNNNN  
NNNNNNNNNNNNNNNNNNNNNNNNNNNNNNNNNNNNNNNNNNNNNNNNNNNNNNNNNNNNNTGAAAGCGG  
CAGGACGCTGCCAGACGTAGCATTAGCATGCAGCGTTGAAGGATGTAAAACAGGCCTGTGTATGAAAGCGGCAGGCAGCT  
GCCAGACGCTAAGATTAGCATGCAGCGTGAAGTGTCCGTTGCTTGTCCAAAGATTAGTTTAAAAAGGAGACGGCAGAC  
GAGAGACGACCGACACCCGTCGGGTACAGTACCAAACTCGAGACGCCGAGACGCCGATCTAACCGAAAAAGAAGCCGTC  
GACGTGTACACGTACACCCGTCACTTTCGTTTTTCTGCTATCAACGACCCCTCTCGCTTGGCTACTTTTCAATTACGGAACAT  
CGTCTTCTCTCTCGTACCATTTCAGTATAAATCTGTATAAACTAAATTTACGCGTAAGGGATGACCAGACAACGACCTAAT  
ATCTACAACAAAGATCCGTTATCCGTCGCCCAACCGGCAACCAACTCAAAAGCATCGCGCGCGCGGGCGGCGG  
CGATGGAGACCCGAGCCGAGCCGACCGACCGGAGGCGGAGGGCCTGGGCTGAGCACGCACGGCCGGTCGAGGCTCAGC  
GTCACGCTTTACGATGCCATGATCCACGCCAGCACGCGACGGCTGGACCTCGAGGCTCGAGCACAGCTGCTGCTCTACTC  
GACTTGCCTGCTACTGTCATCCATCCATGGAGACGGACCGAGCTGCTGTCCCTCGGTAGTGGGAAAGCGGAGCGGAG  
GTCAGAGGCGACAACGACCTGTGTACTGCATCGCGGCTGCCGTCCGGGCTCCCAAACTCGAAAATTCATAGCGCGCGGGG  
GTGGAATCTGAGCCTCGGCCGCGGACGCGAGCTCAAAACCGGGACGGCCTCGGCTTCCCAGTTCCCACACCCCTTGACAGCC  
CACGCGGCCACCCACCGCGCATCGCTTCTTATTCGCTCCACTCACCCAGCCTCACATGCCATTGCCAACCTCTCCTCAC  
TGCTCGCACCCGCTTCCCACCTGCTGCTGCTGCTGACCCCTGACCGCGAGGGGAGGGCGCGCGAGCTACCAAAAGGAACCC  
GGCCGGGGCGGGAGCGGTCAACGCTGCTCTGCAGCCGAGGAAGCTAGGAACCAAGGAGGAAGAGGACCGACGACCGAG  
GACGGACATGCTGGCGCCGCGCTGGGCGTCTAGGAAGCTCGCCGACGCGC  
>SsLRR-RLK410  
CTACCACAAGGGACCCACTAACCCATAACCTCGAAGATTGTACATGCTCCGACGGTACTTTGAGGGCGTAGGCATCAAGAA  
GGACGACAAGAAGGAAGACCCCAAGGACAACGACAAGGATGGGGGATTCCCGAGATCCATGACTGCTTCATGATCTACG  
GAGGACCCCTCGACCCGCTCTCGACGCGCCAGCGCAAAACAGGGCGGCGTGAGGTTTTCTCCGTACAAACGGCGGTCCCC  
CGCTTCTTGATGGTCTGATATGGCCATCACTTTCGACCGTGATGATCATCCTGACTACGTCCCTAATCCGAGAGTCTACCCG  
CTTGTTGTTGATCCCGTCATCGACAACACAGCCTCACCAGGTACTCATGGACGGCGGAAGTAGCCTCAACATCATCTACG  
TCCAGACCTCGACCTCTTGGGGGTCGAGAGAAGCTGCTTCCAAACCGCGTCCGGGGTTTTCCACGGTGTGTGCCAGGGA  
AACCGGTCAGAAAGCTCGGCCGGGTCGATGCTGCTTGTCTTGGCACACCGTCCAACCTTCAGAAAGGAGACTTTCACTTTT  
GAAGTGGTCAGATTCCGTGGAACATACCACGTATCCTTGGGCGCCCGTCTATGCCAGGTTTCATGGCGGTCCCGAACTACA  
CCTACCTCAAGCTCAAGATGCCGGGCCAAACGGTGTATCACTGTGGGGCCCTCATACGAGCACGCCTATGAGTGCAGC  
TCGAGTGCCTCGAGCACGGCGAGGCTGTTTTGGAATCGCGACCTTGGCTGCGGACCTCGACGGTCTCGCCAATGAGATT  
CCGACCCAAAGCGCCATGCCGCGAGCTTCGAGCCTGCAGAGGAGCTCAAGCTCGTGCCCTCGACCCCTGCTGATTTCAAT  
GAAAGGCGCTGAGCATCAGCGCCACCTCGATCCCAATAGGAAGCAGTGCTCGTGCAGTCTTCTCCGCGCAACATCGACA  
TCTTTGCGTGAGAGTCCCTCGGATATGCCGGGCATACCCAGGGAAGTCGCCGAGCACGCCTTGGAGATCCGGGCCGGATCCA  
AACCCGTTGAGTCAACCTCGCGCTTCGACGAGGAGAAGCGCAGGGTCACTCGGTGAGGAGATACAAAGCTGCTGGAG  
GCCGATTATCAAGGAGGTTTCATCATCTGAGTGGCTAGCTAATCTGTATTAGTTAAAAAAGAGTGGGAAGTGGAGGAT  
GTGTGTAGACTATACTAGTTTAAATAAAGCATGTCCAAAAGTTCCCTTTCCTTTACCACGCATTGATCAAAATCGTTGATTCCAC  
TGCGGGATGTGAAACTCTCTCATTCTTAGATGCATACTCCGGTACCACCAAAATTAATAAGAGTCCGACCGAGTCCGCG  
ACTACTTATTAACCCATTCGGCATGTATTGTACGTTAGCTTACGATTGCTTTCCGTTCTCCGGAACGACGAGGGCTACGACGGA  
TGCATGCAACACGTTTTTTGGGGAACAATCGGACCAACCGTCGAGGCTTACGTCGATGACATCGTTGTCAAGACCAACAAG  
CCGACGTTGGTAACGACCTTGACGTTGCGTTCAATGCTCCGGGCAAAAAACATCAAGCTCAATCCTGAGAAATGCGTCTTT  
GGCGTTCCTCGAGGTATGCTTTTGGGGTTCATCATGTCTAAGCGTGGCATCGAAGCCAACCCAGAAAAAATCACTGCGATAA  
CCAAGATNNNNNNNNNNNNNNNNNNNNNNNNNNNNNNNNNNNNNNNNNNNNNNNNNNNNNNNNNNNNNNNNNNNNNNNN  
NNNNNNNNNNNNNNNNNNNNNNNNNNNNNNNNNNNNNNNNNNNNNNNNNNNNNNNNNNNNNNNNNNNNNNNNNNNNNN  
CCGAAAGGAACCCGCGCGGGGGGAGCGGTCAACGCTGCTCTGCAGCCGAGGAAGCTAGGAACCAAGGAGGAGGAGGA  
CCGACGACCGAGGACGGACATGCTGGCGCCGCGCTGGGCGTCTAGGAAGCGGC  
>SsLRR-RLK133  
TCTCTGATTGGGACACACGTCTAATGTATTTGGCTATAAACATCAGGCTTAAAGTATCATTTTTTGTGTAAAGTGTACACGTGAC  
GTTTGATCTTCGGGGGTGAGTGTGCGTGCGTGTATGGACATCTACAGTTGTACTGTGCCGTGAATTTCAAAAAACAACA  
TTAGCAATATGAGGACGGAAGTATTCCATCATGCTAGCTTAAAGTTCTATCAAAATCTATCACAAATGAAAAAATTTAAAGGTG  
AGGTATTGGAAAAATAGTTTTTATTGTTTCAGATGCATTTAGATTGATTTGAAACATTGGATCTTAGATATATGTTCAATGT  
TTTGAAATTTAATAATAATATTGACATATGGGTTACACTTAGCTTCGGTTTTAAAAAGTTTTTGTGTATCTAGAACAAACGAA  
TGCATCGAGAAAAAACAATTATATCTTATTGATTTTGTAAATTTAATATTAAATTTAGGGATATATTCGAGTTTAAATATAATTTCTCC  
TCCCCTATTAAAGAAAGTTAAGTAAGTTTGTATGGACATACTGAAATCCTTTACTGACTTAGGGCAACCACAATGTACAGTAAG  
TAGTCCATGTATATAGGACCTATGTGATCAGTTCATAGCACTATTTTCTTACAATGTTGAGTCAACATGTATTATAAGAAATC  
CCACTAGAGATTAAAAAACTTCTCTTCCACCCCTTTAGCCAACAAAAAGACAGAGAAGTAAGAAATGATAATATTTTATTG  
TTTGACGTAGTTTCAATAATCTTATGAGTAGCTTTTGTACACTTTAGAGCCTATTTTGATTCTTCTCTCAAACTTTAGAGCTCT  
AAAACTTTATAGCACTTTAGATCACTTTTGAACATAAAGCTCAATGTGAGGTGGATTAAAAATTTAGAGCTAACTTTAGAC  
CATTTGTTTGGAGCTTTGGCTCTAAAATTTAGAGAAGGAAATCTAAACATGACACATAAATCGAACAAATAGCCCGGTTTGT  
TTCCCACTCTTTCAATGACATGTAAATGAACAATTAGCCCTGTTTGTGTTTTCCCACTCTTTCAATCTTCTGGAAGAGTAGT  
CCATAGGATTAAAAATTTGCTATCAGGTAGCTGGAACATTGTGAGACCAGTCTATAAGGTAGTTTCATAGCAAAAGGTACCCA  
TAAGCTTATGGACTACCCATAAGGAATAAAAAATATTACTTTTCTCACTCCTCTCTCTTCTTCTTGGTTTTTGCACAGGATT  
GTAAAGAGAAATAATTTTTATCTCATATGGGACCCACCTTATGGACTACTTGGTGGCTGAAACATTGTAGAGACAACGATAG

>SsLRR-RLK91

>SsLRR-RLK71

>SsLRR-RLK112

CTTCTCTTTCTTCTTGGCCATTGCACACGCACCATGGGACTGGGGAGTAGGGTACCGTATCCATGTAAGATCCCTCTCTACTC

CGTCTCCGACCCATGACTCGTTCGGACGATATATCCCTTTACCCCATTCCTCTTAGCCCCTTTTGATACGATACCTCAAAGAC  
AGGGAGGGAGGGGAGAGGTCTCCGGTGATCCAGTCTCCATGTCTATCAGTATCGTATTTTCTCCTCTCTCTGCTCCATTG  
GTAGCTCTCCACTCCCTCGTTCTCATCCCCCTCCAAAGCTCTCTCTCTCCCTTTGCCATTGTTTTGGTGAAACACCTCTC  
AACAAATCCAAGCGAGCCAAAGCAATACCGGCACCACCATTGCCATTGCTGACCACACCTCTTCTTAACCTCCATGCA  
>SsLRR-RLK150  
TGCTGTACGATACCCCTACCGTTGGGAGTCGGGAATAATTTGTTCACCCACTGATTAACATATGCCGCAACCGTACGGAAAATA  
CAACGGACAATCATGATCACTCCTAGTGCTACACTGCTACACGTGCCAAACACAAACACAATTAATGCATACCCCTACCGTTGG  
GAGTCTTAACGCTAGACTAGCGCCCGCGCGCAAGCTGTACGGCTGGACTTGCTTGCTTGTGATATTTCTGTCATGCCTG  
GACAATGGCCAGGCGCCAACCTCGACCGGCATTTTCCCACCAAAGTTGTACAGGCCAAAATAGTTTCCCATGAAACTTGGC  
CATACAGGTTTTTGGTTAGAAACAGATTCTACGCTATGCGTCTCGAGCTGCAGCTTCCAACAACATGATTGTGGCATTTGGCAAA  
GGTGTCTTGGTTTTGTGAATCCCCTTTGTGTCTCGAACATGTTTTTTTTTCAAATGACTATGTGTCTCGACTCGGCACGTTTT  
CCATCGAGAGGGAGGGAATGTTTTGGACAAGTTAACATGAATACAGATAAGATAATTACTAAGGACATGCTTTTATTTCATAA  
GTTTTAGAAAAATACTTACAACCTTAATCCCATGCCCTGCATCTTTGGAGTCCATTTGAAACACGGGAATTTATAGAAATGTG  
CAAAGTGTTCATGACTGAATGATTCACCTTTCACAAAAAAATGTTGAATTTAGTAAGAACATTCATGTTTTGGAGTTTTGTGAC  
TTTTAGACTACTAGCTTTTGGACTTTTCAAAAGTCAAAACAACCTCTCACAAACCAAAGTCCAAAAATTCATTCTAATGAGCT  
TGTGGTTTTTGCCTTCCAGAAGCTTTTGGTTATTATTAATAAAATCCAAAAGGAGGTCCAAAAGTTCCTAGAAAAGCCCAAGC  
AAATAGATCCCTAAAACCTTTGTAAGTTATGCTATCACTATAGCTGTAGCAAGTGCAGCTGAACAGAAAACCTTATACTAGTCT  
AACCCTCTGCCTTGTTCGTTTCGTAAAAATTTGGCTTTATGCTACTTATGCTGATTGTTGTGTGAGAAGAAAATATTGTTCTT  
TACTAACAAAGTACCGCTGAAGTAGTGCTAAAAAACATGGCTCAAAATATTTAGGACCTAAAACCTACTACTTTCTTATAAAAC  
ATATACTAGTACTTTCTTATTCCTATAATACGAGAACATGGCAATCATCCAAGAGGAGTCTCAAACCTAGTTACCCATTTGTTTT  
TTTCTATGCTTCCTATGATTGATTGTTAATTTTAACTTTGTATTGAAAGTCTCGTTTTGGATGGGCTTCTTCGGGCTCACCCGGCC  
TGCATTGGAGGAGTCAGAGAGAGAAAAACGGTCTCTGCTAGTGTAGTTCAGCGTGGGGTTGGAGAGGAGGCAAGAC  
ACACGAAACTCTAAGGAACACCCCGCGGAGTGTGCGGCTGCCATCAGAGAACTGCGGTGATGTTCTATTGAGTTATAATC  
CGTATTTTCAATTTATTTTGTAAAGTGTGTTTTTCTCTCACCAAAATCAGTAAACAGTGTGTTTTGTAGTCGACTTATTA  
GCACTGAACGGGGCTGCGCTGCAAGTCCGGGCGCCGACGGCCCTTGAGGCCAGGGCCCTGTTCCGGCAGGCTGTTTTTTTT  
TGGCTTATAAGCCGGCTATGGCTGATTGCTGTGAGAAAAAAACACTGTTCCACGGCTGATAAGCCGTGCTGATAAGCTCA  
GTGCAACAGGGGAGGACGCCAGGTCCACGCCGACTACACGGCGCGGGGACTAGAATAAACTGAACCTAACTTTGTTTT  
GGAGGATTTCTGAGTAAACACCGCTAAAAAAACATCAGAAACAGAGTGTGAAATCCGCCCCGTGTTCCGGGATTGCGGACCG  
CCGTTTGCCTTGGGTTTGGCAGTGCCAGTGAGTGGGTGCAATCATCAGTCAAACCATCCCCACCACACCTCGACA  
CCAGCGGCCAGCCCCGTC  
>SsLRR-RLK332  
CTCGAAATATACTCTTGTCTCGTCGATCGGCGCGGTGCCCCACGGCACGACGATCGACGAGGACTTGAACCTTCTTGTTT  
GTTTGTGTTGGGTTTTGTTGCTGCATCGGCATTGACGCGAGTGCCTGCGTGCTATACGGCCAAAAGGCGGCCGCCATG  
GCCGAGCGCCGAGCTGTCGTGTAGTGTGACAACTTGCAGCGCAGTAAGGCCAAAAGCACACAGGGCCCTCTTTCTGTTT  
GTCCATGCGGTGCCAAGGTTAAATTAAGCGGAGCGCTGCTCCGCGGTAGCCGTCCAGTATAGAAAGAGTGCAATT  
GCCTGGTTTTCAAATAAGTCAATATCGATTTTAAATTTGACTAATAAGTTATAAAATCAAATATTTATGTTCTTAAATAGATT  
ATACGGAAATATATATGAATGTGATTAACTAGGGCTGATTGGTTGTGTGCCAAAACCTTGCCCAACCAAAATGAAGGTATG  
CTCAAAAATTTGGGTATTGATTGGTTTATTACTTAAAAATTTGGCACACCAATTTGTATGGGCCAAAAGGCCCGTTCGGCTG  
TGCTGATAAGTTGGCTGAAAAACATCGTTGAGTGATTGTTTATAAGAGAAAAACACTGTTTCCGGCTAAAAAAACAAGCTGA  
AAAGTACGGATTATAAGCCGGATGAACATGACCAAAATCATGGCAAAGCAATTAGAAAACCTTCTCAATCTCATAAGAGGCAA  
AAGTGCTCACTACTATGTCATGACACTCGACCAAAATGTAATCTTATTTTTACGGTAAGCGCATGTTTTGGCTTGTCTATGAT  
TTTGATCGGACAAGTTTTTGACACCCAATCAATGCCAATTTGCTCAATTTAGTTGAGGAGTAGTAGCACTGTGGCGAGCTGGC  
TAGCAAACAGCTGTCCACTCCCGCGGTCCCGCCCTCCGCGGTACGCACTGGCACTGTGCTAATGCACGCCGAGGCCCC  
GAGAGTGTGGCAACCTCAACCGGAACCGGACAGGCCATCTTTTTTACCCCAAACTCTTACCCTGATTCTGATCGTTG  
GTGCGGATGCGGACTCAGACGGACGGGACGGCCAAAACGTAAGTGCTCTCGGGCGTGACAGTGGCTTGTGCTTCCA  
CTCTCGGCTCTTGGCGCGGACAAAAGGACTCGCGGTGCTACGAGTTTCAAACGCCAAACGGCGTCAACGACATTGGGCCTC  
TCCTCTGTGTTGGTATTTTGTGATAAAATATACTCCCAAATTCGAGTCAAAGCTGCTGAGGCACCCCGAGCGGCATGTGCC  
ACTGCCAGATTTGAACGGGGACGCCGAACAGATGCACCGCCGGCCCCACCGCGCAGCGTCAACCCGACAGCCCTCACT  
CCACTCCACCTGCGGGAACCGGAGGAAACCTCCAAGGCCAAGGCAGCAGCAGCACCATTTCACCATTTATAGTATCTCT  
ACTACTACTGTAGAAGCTTGGGGATTAGATTAGAGTAATCATGGGGATCAACGATAACCCCTTGAGATTTCCCATATGCAAACA  
CGCTCAATTAATCTTACTTTCCCAAAAGTGCCTCCCGACCAACATATCAAATGCTTCGAAATCGAATCTCGCCACCTCA  
CCACTAGGCTCCCTCCAGCGGGTCCCACTGACGGCATCTGAGCACTCACTTCAAATCTCTCCCCAACTACCCCT  
ACCTTCCGCCATAAACCGTGATCCTCCCGCGGGTCTTCCCGTCAATTCGCCGCTAAATCTCAGTCACTAACCTAACCCACACCC  
CACGCCGGCAGCGCGCCCTGTGCTGCCCTCCCTGGCGCTTCTCTCCCTTCTCTTACCCCTCTTCCCTTCTCTGCAACTGC  
GACCTTGACGCTCGCTCACGGAGTCCCAGGGAATGCCACCCCTGTGATTCCGTGATTCTCACTCACTCAACGACACCAC  
CACCATCCGTTCCGCTCGCTCCGGGCA  
>SsLRR-RLK379  
TCCAGGTCCCTAAACTTTAAGGTGATACCGCAGGTCTGGCCGGCGGTGTCATCTCAGTCCCTGAACCTTTCAAGGTGATA  
TCACTGCAGGTCCCTAAACTTGGCAAGCGGTATCGTCTCTGTCAAAATGTGGTCTAACCTACTCTTTAAGTTGGCGTGGCAC  
GCTGAGTGTATGTTAGACGTGGATCCAACATGTGTCAAAATCAACCAATCAITATTATATAATATTATCATAAAAATATAAATTAT  
ATAAATAATTTACATCAGGAAAAATAAATTAAGTTATTAATAAATTTACAACAACAAATATTAGGTTTTAACTAAATAGAAA  
AAATACAAAATTAATTTAATTTATGTATCATTAATAGTATTAAAAATTCCTATAGTATTAAAAATTTGAATAAAATACTTCTAATTT  
TAGTATTATTTTAAAAAGTTTAAATAGTAGTATTATAGAAGTAACTTCTCTATTATTAATACTACGATTATAGTATTAGAACTTTT  
AATAATAGTATTATAGTATTAAAAAGTTTTAATAATAATGTTATAGTATTATAAACAGAGAAAAATTTACTTCTATAATACTACTATTA  
AAACTTTTTAATAGAGAAAACCTTTAATAATATGGGTAACTTTTAAATATTATTATATTGGGACAGGGATTACATAAGTTGTCAAG  
TTTAGGGACCTACGGTGATCATCTTGAAAGTTCAGGGACCGGGATGACACCGCCAGCCAAGTTTAAAGGACCTGCGGCGATC  
ACCGTAAAAAGTTGAGGGACCTGGATGACACCGTCTGCCAAGTTTGAGGACCCACATATATCACTTTAGAAAGTTCAAGGGACCT  
GGATGACACCGCTGGCCAAGTTCTGGGACAGGGGTGAATTTGTCTAAAAAGAATAATAATATTCCTCCATCTGAATAA  
CATTTTATTTTGGTTTTCCCTAAGGCAAACCTTCTAGAAAAATATATTCATATATCTATAAGTTCAAATAATTTCTCGATCAAA  
ATATATTGCTTGAAGAATCTAAAGAAATAGTTTTGATGTTCTTAATTTGTTGGTGGATTTTATACAAACTTGGTCGAATATAGTA  
CAAAGTCACTATTGGAGACTTAAATGTTCTTGTGCGTTTAAACCCACCGACAGGGAAATTAATAATTTCTGTGCGGAACC  
TAGAGCCGATAGAGTAATTCGAAAACCGATAGGGTGAATACATTTCTCTGTGCGAGTTTTTGGTCAACCGCTAGAAAAATGTAT  
ATTTTCTATGTGTTTTGGTGCCACCCACAGAAAAATCAATTTGAAGAGCACCGGGAAACGAAACACGCAAAACCGGGCT  
TGGGCGCGGTGACCTTTACGGCGCCTAGAAGCGGGCGGTGTGCCACCGATAGGCAAAATTTTATTTTCTGTTTAT  
TTCTATCAATAATGATATATGACAGAAAAATTTTATTTTAAATTTCTATCGGTTTTGTGTATTTTCTGTGCGGTTTTACCG  
ATAGCAAAATTTTAGTAGTGAGTCAAAGCAAAATGGAACAGAAAGGTGTGCTAGATAAAATGGAGTGCCAGTGCCACGCGCG  
GTGAAAAACAACCTGATAACCGTGTGCAAGTAACATGTTTTCCACTCTGTGAGAAATTAAGACATTTTATACCCACCTGTG  
CCTTCTCCATCTTCTGGATTGTAACTCTAGAATCTACTCTGTACTGGCAGTTTTTCCCATGACAAGATGCCAACATAGC  
CTTGTGCTGTGCTGCCCTCCGGCAGATCTATAACCTTCCCGTAGCCTCTTGTGACCCCTCCCTCTCGCGTTGCAATTGGCG  
GCCTCTGCCTCTGCCTCTCTTCCGCTTCCACACCACTGACTGACCAACATACGTACACTAGCTAGCTAGGCATCGGCAG



TTTCTTACTATTATTGTTTCAGTAAGACAGTAACAGTAGGGAAATTATTGATCTGCTATGTGCATTGGTTAAATCAACTGATCA  
AAACGGTTATGCTGTCCATTACCATGCATCGACCGATCTCAGAGTCGCCCACAGTGTGAGTCTTTGATGGTCCCAAAATAACA  
GGATTAGTCTCACAAAAGATGAAGGACGGAAGGAAAGAAAGGTTAAGTTAAAGGCAGTTTCGTGAAACAGGGCCAT  
GCTCTCTCTCTGTCTGTCTCACTTGGCAGGGCATTGTGATGGCTGGATCTGAGACAATAAACCCCTGTGGCCACTATGGCATTG  
CATGTACTAGCCCTCGTTTAGATCGAAGATTTTTCACCTGATGAATAGTACCCTTTCGTCTTATTTGACAAATATTGTCCA  
ATCGTGGACCAACTAGGCTCAAAAGATTCATCTCGTGATTTTGAATAAACTGTGTAATTAGATATTTTTTACCTACATTTA  
GTACTCTATGCAACACAGCTAAAAATTGATGTGATGGAGAGAGTAAAAAACTTGGAAATTTAAAGGTGATCTAAACAAGGGC  
TAGTTGCTATTTAGCCAGCACAAAGCTCATTTCCAGCACAAAGCTCAGGGACAAGAGCATACAAACATAGCTGCCCGAGGC  
CAGGCGTACAGGTAGGCAGATGATGGGTGTAGCTTGGCTGGGATCGTTGATAGCATCATCGGACATACTCCCTCTCTCCATAA  
AAACATATAATTCTCGTTTTTTTGAAGTCAAAACAATTTCAACTTAACTAAATTTATATAAAAAATACTAATGTTTATGATACAA  
AATAAGTATCATTAGGTAGTTTAGAATATATTTTTATAATAAATTTATTTATAGACATAAATGTTAATACTATTTGCTATAAATTT  
AGTCAAACTTGAGTTAGTTTAACTGACACGCATCCTATAATTACATCTTTTCTCGGAAGTATCTAATGTTGGTCCACGCGGCC  
TGCTGCCGAGTTGCTGTGGCACTGCTTTCCCTGCCAGCATGCATTGAGCAGGAGAGGCCTTCAATCAGAGTCAGACGATGC  
ATGCCATGGGCCATGGCAATATGATGGCTCACACAGATACAGCTGTGGGCCTTACTTAATGTAGGCCCTGTTAGATGCTTAA  
AAAAATTTCAATCCGATAAATAGTACCATTTTCGTCTTATTTGACAAATATTATCTAATCGTGGACCAATTAGGTTCAAAAGATT  
CATCTCGTGATTTCCAATAAACTGTGTAATTAGTTATTTTACCTATATTTACCCTTTCATGCATGGATCTAAAGATTGATG  
TGATGGAGAGAGGCAAAAAATTCTAAAGATGGATGTGATGGAGAGGCAAAAAATTTCAACTTTTCTAGTAAGACCCAGT  
GCAAGTAGTACTGGTATGGGACGAGGCGGGCACAGAAAGAAATTAATGGCAGCACGAGGCTTTTTATAGGCTCGAGGAGG  
GTAAGGTGATTACTACCGTCTTACCCATTGACTGTCTCATGAGTGTCTGGACGCGGCCCTAATTCGAATCTCTCTCCCTCTCCT  
AGCTTTTTGTGTGGGTGCTTGCTAATCTCAGCCACACACAGCCATAGCTGTTGGTGGGCGGATGAGGCTGAGCTGCTTCTG  
CAGTGTGCAGATGCGGACGAGACGCGCTGATTCGCTTGGCCTGGCTGTTGCTCCAATCAAAAAAGGCTGCTGCGG  
TCATGGCTATCCGTGCTCAGCCCGTGACCGTGAGCAGCATTTAAAGTCTTTCCTTTCCTTCATGCCCTCTCCATCGACTCGCGG  
TCGCGGGGCGTTGCCGTGCGCGGCCCTCGTTTCGCTTTCCTTTCAGCTCCCTCTACAACACCGGCAATCGCCAATCTTAAGGC  
AATGTCGCCCGCCGCCATTGGCTTAAGATCGCTAAAACCTAAACCTAAACCCCAACCCACCCCACTCTGACCCACAGCCA  
CCCTCACCA

>SsLRR-RLK241

CATTAGGAGATCCACATGGTTGATGGAAGCCTCCATCATGGGCCATAGTTGATCCTCCATCTCCACAGTCACTGCTCAAGATT  
ATGTATAAATGGAACTTCTCATAAAGAGGAAAAAAATAATAATAACAGGGGGTATCTCTGACTGACTGATTAACAAACAA  
TCAAACAAACAAAGAGTCAGAGGCCACAGTGCATGAACATGGGTGCCCTCTGGTTCATGTGACATGTGAGTGGTGAGTCAA  
ATGGACTACTCCCTAGTCACTACACATGTAAGTTTCTCGTGATCTTCTTTTTCTTTTGTAATAAGAAATGTTCTTTGTCTT  
ATTATTTCTAGCCAGTAAATAGATATCAGATGGCCTGCATTCAATGAGGCCATCTTCTTACTGTTATTTGTCAGTAAGACAGTA  
ACAGTAGGGAAATTTATGATCTGCTATGTGCATTTGGTTAAATCAACTGATTAACCGGTTATGCTGTCCATTACCATGCATCG  
ACTGATCTCAGAGTCGCCCCACAGTGTGAGTCTTTGATGGTCCCAAAATAACAGGATTAGTCCCTACAAAGAAATGAAGGACG  
GAAGGAAAGAAAAAGGTTAAGTTAAAGGCAGTTCGTCAAAGTGAAGGCCATGCTCTCTCTCTACTGTCTCACTTGGCAGG  
GCATTTGTGAATTTGTATGGCTGGATCTGAGACAATAAACCCCTGTGGCCACTATGGCATTGCATGTACTTGTCTATTTTCAAG  
CAGCACAGCTCAGGGACAAGAGCATACAACATAGCTGCCCGAGGGCCAGGCGTACAGGTAGGCAGATGATGGGTGTAG  
CTTGCTTTGTGATCGTTGATAGCATCATCGGACATATCTACATGGTGGTCCAGGCGGCCCTGCTGCCGAGTTGTCTGGTACTG  
TTTCCCTGCGCTGCATGAGTGTGAGCAGGAGAGGCTCTTCAATCAGAGTCAGACGATGCATGCCATGGGCTAGGCAATATGAT  
GGCCTCACACAGATACAGCTGTGGGCCTTACTTAATGCTAGTACTATCCGGCTGAGCTTATCACCCGTAGAACAGCGTTTTTT  
TCTCACAGTAAATCAGTCACAGCCGACTTATAAGCCAAAAAACAGCCTGCCGAACAGGGCCTATATGTCATGAAGCAACCC  
ACATGCAAGCAGTACTGGTATGGGACGAGGCGGGCACATAAAGAAATTAATGGCAGCACGAGGCTTTTGATAGGCTCGAG  
GAGGGTAAGTAAGGTGATTACTACCGTCTTACCCATTGACTGTCAATGATGTCTGCACGCGGCCCTAATCCGAATCTCTCT  
CCCGGCCCTCGTTTAGATGCTGAAAAAATTTCAACCCGATAAATAGTACCCTTTCGTCTTATTTGACAAATATTATCCAATCGT  
GGACCAACTAGGCTCAAAAGATTCTCTCGTGATTTCCAATCAAACTGTGTAATTAGTTATTTTTTACCTACATTTAATACT  
CCATGCAAGCGCAATAAATTGATGTGATGGAGAGAGTAGTGAAGAAAACTTGAATTTTGATGTCATAAACGAGGCGGCT  
TTTTGTGTGGGTGCTTGCTAATCTCAGCCACACCACACCGGCTAATCCTCATCTGATTGACAGACCATAGCTGTTGGTGGGCG  
GATGAGGCTGAGCTGCTTCTGCAGTCTGCAGAGTGCGACTGCGGACAGAGACGACGTGCTGATTGGCCTGGCTGTTGCT  
CCAATCAAAAAAATGGTCGGTCATGGCTATCCGTGCTCAGCCCGTGACCGTGAGCAGCATTTAAAGTCTTTCCTTTCCTTC  
ATGCCCTCTCATCGGCTCGCGGTCGCGGGGCGTTGCCGTTCGCGGECCTCGTTTCGCTTTCCTTCCAGCTCTACAACACC  
GGCAATCGCCAATCTTAAGGCAATGTCGCCGCCGCCATTGGCTTAAGATCGCTAAAACCTAAACCCCAACCCCACTCTGACC  
CTGACCCACCAGCCACCCCTACC

>SsLRR-RLK242

TGGACGATCCGACTAAGCCGCGCGCCTCGTGTTATTCGCGCCCGCTCGACGCCCTCCCCATTCCCATCCCGTCTCTTTTTCG  
CGGCTCCTCACTCTCTGCTCTGCTCGTGCGCTGCGGCCCTTCCTCCATCTTCGACCTTGACACCGTGACGCGCGCGGCTT  
CTGGCGAGCGTGTCTCTCCCTCCCTTTCTCCCTCCCTCCCTCCATCCCTTCGTGCCCCCATGACCTCCATGCCACCGAGAGAAG  
AGGGCAACGTCGGAGTCTTTCCAGCGAGCCACCCCTCCCTCCTTCCCTGCCCTCCCTCCCTCGCTCTGCCACATCCATGCCAC  
TAGAGAGGTGTGTGACGGAGGTGGCTTCCGACGAGGTAGGTAGGTCTTTTTCTGAATCTGAGCCCTCCTCCCTCTCTCTTT  
GGATCTAAGGGATTGCGGCGGTGGCTAGGATTCTGGCGAGCTCTCGGGGGTTAGATCTCGCCGTGCTGCAACGGTTTTATT  
GCATGTTACAGTGTCTTTCACTTGATGTTGCAGTAGTACTTTTTAGATGTGTGCAGTATGTTTTAGTTGTTTCAATCTCATGT  
TGCAAGTATGTTTCCATGTTGTTGCAGCTGTTTGTTCGATGTGTGTTGCAATAATATGTTTCATAGTGTTCAGCTGCTCCAGCCT  
AATGTTTACAGCTGTTGTTCTTTGTTGCTGCAATAATATGTTACCGGTGTTTCAACTTCTTCATACCTAATGCTACAGTGTGTCT  
CTTTTTGTTGTTGCAATATATATGTTTCATGGTGTTCAACTGCTTCAACCAATTTGTTGTAGCAGTTTGATCAGTGTGTGTGCA  
ATAATACGTTTCATGGTGTTTATAGCTGCTTCAGCCTAATGTTTATAGCTGTGTGTTCTTTGTTGTTGCAACAATATGTTTCATGGTGT  
TTCAACTGTTTCAACCTAATGTTTACATCCGTTTGTTCCTTGTGTTGTTGCAATATATATGTTTCATGGTGTTCAGCGGGGGGCGATT  
TGGGGGCGTGCGGTCTTGTGCGGCATAGAGGCTAGCGGGGCTCTTCGTAGGCAGCGGGGCTCTTCGTTCGACGAAGACGCA  
GCAGCGGCGGTTGAGCGGGGCGCAATCTTAGGACGGCGACATCGGTGCGCCCAACATCGGTGAAGAGAAGCGAGTGGC  
TGGGAGCGGGGGGTTAGGCGGGGAAGAAGAAGTGAAGCGCGGTTGGTGTGGGCGGATTTGCGGACGGGTTTGGCTCGGT  
GCGACGCGCCCTGCGGCACCGTCCGATGGATCAGTTTGCGGGTATATTGGGCTGGGCGGTTGCGGGAGCAGCGGTGCTGG  
GCCAGATGGGGAAATATACAAGGCCTTTGTCTCTCCGTCTGGGGGAAGAAAAAGGAAGGAGCGAGCAATCCACATGCAAGT  
AGTACTGCTATGGGACGAGGCGGGCACAGAAAGAAATTAATGGCAGCACGAGGCTTTTGATAGGCTCGAGGAGGTAAGTA  
AGGTGATTACTACCGTCTTACCCATTGACTGTCTCATGAGTGTCTGCACGCGGCCCTAATTCGAATCTCTCTCCCTCTCCTAGC  
TTTCTGTGTGCGTGCTTGCTAATCTCAGCCACACCACACCGGCTAATCCTCATCTGATTGACAGACCATAGCTGTTGGTGGGC  
GGATGAGGCTAAGCTGCTTCTGCAGTCTGCAGAGTGCGACTGCGGACAGAGACGAGCTGCTGCATTTGGCCTGGCTGTTGC  
TCCAATCAAAAAAATGGTCCGTCATGGCTATCCGTGCTCAGCCGTGACCGTGAGCAGCAITTAAGTCTTTCCTTTCCTTC  
ATGCCCTCTCCATCGGCTCGCGGTCGCGGGGCGTTGCCGTGCGCGGCCCTCGTTTCGCTTTCCTTTCAGCTCCCTCTACAACACC  
GGCAATCGCCAATCTTAATAAGGCAATGTCGCCGCCGCCATTGGCTTAACCTAAACCCCAACCCCACTCTGACC  
CACCAGCCACCCCTACCA

>SsLRR-RLK333

TCAGTCAAGATACAAGACTGCTTTGATTACGAGTGATTCTCTCTTTCTTTTTGAGAAACAGAGAACTTCTATTGATCAATC  
ACAAGGTGTAGCCCTGTTTCGCTTGAATACTTCAACGATACTTTTCAGCGAACGAATAGTGTTTTCCTTTCACAACAAATCA

GTATAAACTAAATTTTCAGCGACTACCAAATGCTGAATCAACACAAAAGGGGGACATTTTAATGAGGTGCATGGCCAGGCAAT  
TTGCAAAATCTGTACAAATGGTCTGTCTACATTATGGGAGCCATGCTGTCTCTGAATATTACTGCTTAATAATGCTTACACAC  
CATTATATTTCAGCCTTCTCATGAACCGAATGAACAACAAACAAATCAAACCAAACAGACCAATTCTCTCATGTTGTTTGTTCATT  
CCTAATCCAATTGCACCTCAGTATTTTGAATGGCTGCTGAGGCAGCTAGCCAGGTGCATCAAAATCTAGGAAAATAAGCCAA  
GAGGGGGCTTATCTTTTCATAATCTTTCTCCCTAACCTCTGCTTCCAAGCTTGAATAGGTGCAAAATTTGTAGAAAGAGGCTTAGA  
ATGGGCTCCATGGTCCGAACAACGGTAGCCGGGCTCAAGCCCCACCCCGGTTGTTGGATCCGCCATGTGTCAGCAAC  
CTGCGCACTCAAGAGTTGGCCTTGGGACCTTGTGCTACTTTTGCCATGTGTAGTAGTAGAGCCCAAGTGAGGAGCCAAAACA  
ACGGTAACAGTACCGGCACAAGCATATAAGTCAACTGAAACAAGCTACAGATCAAGGGGGGAATCGAAATGAATAACCT  
GCGATATTCAGTTTGGAAATTTTCCAAGGTAACAAATTTTCTAGGATTAAGTAGATTTTAGGATTTTAAATTTTCATTATTTT  
CTTTGTGAATATTATATAAGTTTGGAAATTTTATTTTACAATTTTGGATATTTTGGAAACATTTCTAGTCTAATTTAGCT  
CCATAAACTTTCAACTTAGTTCGATTACTCCTCTAAGGTGGCGCCACATTAGCAGAATTATCCAAGGTGCAAAAACAAACTG  
TTTTGTTTTATTATTAGTGAAGAAAATCAGATGACCGCGATAAGGGTGCAAAAACAAACTGTTTTGTTTTATTATTAGTGA  
GAAAAATCAGATGACCGCGATAATCGAGAGAGATAATTTGGATTGTTTTCAAAAAAATGAAGCCTGTTTTTAGCAGAAAAA  
AAATGAATCGTGATAACCGAAAGGGAATCGATCTAGCCTAGATCGGGGCCGTTTGTACCGTGGGCCCTTTTGGGCCATTTC  
CGCCCTACTGCCTCGTTTCTCCGGTGCCTTCCGCTCTGCCACATTCTGCTACTCGTCGGCGTGGCGTGGTGGGGCGGCGA  
CCGCGGCTCCGTGGCGGCGCTGGCGTGGAGGACGTGGTGAAGGAAATGGTGAACCATGCTCGCATCAACAAGCACTAAC  
GTAGCCGGGCAAAACTGAGCAAGGAGCGGGCGGCAAGACAGAGCATCCGACTACCGTCAAGGCGGCGGCTTATCCT  
GTAGCTCAGAGAAGAGCCGTGAAACGACGACAACCTCGTCAGTCGTGAGAGAGCCGCGCAATGCGGGCATGGCTATTCTT  
GGCCAAAACAGCAGCCGACCCCAATCCACCATGGCCGGGCCATGCCATGCGGACGCCTCTCATCTCTCGCCACCG  
CCCTCGCGCAGCGCGTGGGTGCGTGCCTGCGCGCGGGGAGCTCTGAATCCTCTCTCTCCCTTCTCCGCTCCCTTT  
TCTCTCTCTCGCTGACCTCCGCTCTCTCTCCCTCCCTGGAAAAAACAGCGTGCCGGCCAGCCTTTTCCCCACTCGCGC  
CGCCCGGGAACAGGGGCCGCGGCCAATTCACCCGCCGTCGTCAAGCGCTGGCGCCGCGGGCTGGCTCCCTGGTACCGG  
CGCGCGCGCCGCTTCCCGACATGGCC

>SsLRR-RLK308

GTGCAATAGTAATGCTACTACAATTTTCGCTCGCAACTGTACCTATATTGCCTATTGGTGCAAGTATAAACTCAGTCAAGATAC  
AAGACTGCTTTGATTACGAGTGATTCTCTCTTTCTTTTGAAGAACAGAGAACTTCTATTGATCAATCACAAGGTGTAGCC  
CTGTTTCGCTGAACACTACTTCAACGATACTTTTCAGCGAACGAATAGTGTTCCTTTTCAACAACAACTCAGTATAAACTAAAT  
TCAGCGACTACCAATGCTGAATCAACACAAAAGGGGACATTTTAATGAGGTGCATGGCCAGGCAATTTGCGAATCTGTAC  
AAATGGTCTGTATCATTATGGGAGCCATGCTGTCTCTGAATATTACTGCTTAATAATGCATTACACCATTATATTAGCCT  
TCTCATGAACCGAATGAACAAAACAAATCAAACCAAACAGACCAATTCCTCATGTTGTTTGTGTCATTCTAATCCAATTGCA  
CCTCAGTATTTGAATGGCTGCTGAGGCAGCTAGCCAGGTGCATCAAAATCTAGGAAAATAAGCCCAAGCGGGGCTTATCTT  
TCATAATCTTTCCCTAACCTCTGCTTCCAAGCTTGAATAGGTGCAAAATTTGTAGAAAGAGGCTTAGAATGGGCTCCATGGTC  
CGAACACCGGTAGCCGGGCTCAAGCCCCACCCCGGTTGTTGGATCCGCCATGTGCAGCAACCTGCGCACTCAAGAG  
TTGGCCTTGGGACCTTGTGTACTTTTGCCATGTGTAGTAGTAGGCCCCAGTGAGGAGCCAAAAACAACGGTAACAGTACCGG  
CACAAAGCATATAAGTCAACTGAAACAAGCTACAGATCAAGGGGGGAATCGAAATGAATAACCTGCGATATTCAAGTTTGA  
AATTTTCCAAGGTAACAAATTTTCTAGGATTAAGTAGATTTTAGGATTTTAAATTTTCATTATTTTCTTTGTGAATATTTATAT  
AAGTTTGAATAATTTATTTTACAAATTTTGGATATTTTGAAGAAACATTTCTAGTCTAATTTAGCTCCATAAATCTTCAACT  
TAGTTTCGATTACTCTCTCTAAGGTGGCGCCACATTAGCAATATTCAAAGGTGCAAAAAACAACCTGTTTGTATTATTTCA  
GTGAGAAAAATCAGATGACCGCGATAATCGAGAGAGATAATTTGGATTGTTTTCAAAAAAATGAAGCCTGTTTTTTAGCAGA  
AAAAATGAATCGTGATAACCGAAAGGGAATCGATCTAGCCTAGATCGGGGCCGTTTGTACCGTGGGCCTTTTGGGCCCA  
TTCCGCCCTACTGCCTCGTTTCTCCGGTGCCTTCCGCTGCTGCCACATTCTGCTACTCGTCGGCGTGGCGTGGTGGGGCGG  
CGACCGCGGCTCCGTGGCGCGCTGGCGTGGAGGACGTGGTGAAGGAAATGGTGAACCATGTGCGCATCAACAAGCACT  
AACGTAGCCGGCAAAACTGAGCAAGGAGGCGGGCGGCAAGACAAGAGAGCATCCGACTACCGTGCATGCCGATCGACCA  
CCGTAGCTCAGAGAAGAGCCGTTGAAACGACGACAACCTCGTCAGTCGTGAGAGAGCCGCGCAATGCGGGCATGGCTATT  
TTGGCCAAAACGACGCGCACCCCAATCCACCATTGCGGGCCCATGCCATGCGGACGCCTCTCATCTCTCGCCACC  
GTCTCTCGCGCACGCGCTGGGTGCGTGCCTGCGCGGGGAGCTCCTGAATCCTCTCTCTCTCCCTTCTCCGCTCCCTT  
TCCCTCTCTCTCGCTGACCTCCCGCTCTCTCTCTCTGAAAAAAACAGCGTGCCGGCCAGCCTTTTCCCCACTCGCGC  
GCGCCCGGAACAGGGCCGCGGCCAATTCACCCGCCGTCGTCAAGCGCTGGCGCCGCGGGCTGGCTCCCTGGTACCGG  
CGCGCGCGCCGCTTCCCGAC

>SsLRR-RLK321

ACTGACATGGTGAGCAGCATCTTCATGAGCTTCTTTTGCCGCTTCTTATTAGGCATTCTCTCGCCCAATGCCCAAGACTC  
CACACTTCTACATCTCCATTGCGTCGGGGTGTCTGACGACGGATGACAGCGGGATCAGCTTGTGCGGTCGTTCT  
GCTGCCACTTGTGCGTGTCCAGCCTTGTCTCTTTGCTAGTGGTCCACCTTTGCCGCTCGAGGAGGAGCTCTGAGC  
CCACCATGCGACTCTTGTCTCTCGCCATCCACTCCTCCGTAAGAATAAGCGAGGGCTTGGTCTTATCGGTGCTTGTATCTCT  
GAGGTTTCAAACCTGTCTGCGCTGCCCTGAGACGACCGACAAGCTCTTCGACTGACAATGTTTTAGATCACAACCAATC  
TCTATCGTCAACCGCCTGATTGTAGCGTGGAGGACGTGGTGAAGGAAATGGTGAACCATGTGCGCATCAACAAGCACT  
CCTCACCAAGGCCCTTATAGTCGGTAGCCAGCTTTGCAATCTGGACCGCGAAGTCGTGATGCTCTCTAGGTTTGAACGA  
GATCGACTCAAACCTCCGCGAGCAGCTTCTGTGCAATTGACCTCCTGACTCGTTCTGCCCCAGACACATCGATTGATTGCT  
CCCATGCCACCTTTGCCGACTTCTTGTTCAGCAACATGGAGTGCATCTCAGGTGGCAGGCCACGGATCATGGCACCGAGCGC  
AAGCCGATCAGCTCGCGGTTTCGACCTTGTGCTCTCGATTGCAATCCACAGATACATCGCTCAAGATTGCTGACATGCG  
CAGACCACTCTGATAATTTGTGCGAGATAACATTGGCCAGACCAGATTGCCTGACGTTTGATTCCATGCACGCTCCATGGT  
TCCTTCTCGCCGTTGGAACCCATGTGACGGTGTGTCGATGTTACGCTCTCAAGATCTTGATCTCGATGGATTCTCCACCCA  
GCACCTTCTCAATGTCTCTCGCCGCAAAACGTCGTCTAACTGGCTCCGATACCAAGTTGTTAGAACTAGATCGACTCCTCGA  
CGTTGTGCACGCCCGGAACTGATGGTGATCGCGGCACTTAAACCTAGGAAGCATACAACCTAATATCACAAGAAAATA  
TGACGCTGCAATCAACCACAGCTTAGATGGCTTGTGTTCTTGTATTATAGATATGCTCGAGACTTACAGACTCCAAGCCC  
CCCACGCCATGTCCCATAAGATCGCAACACCGTTTACC CGCGGCTGCGCTACACGCGCTCTACAAGACATGGCGTAAGGC  
TGACGGACACAACCGAGTACATCGTATCCCGCAGCCCTACGATACCGGTTACCCCTACCTGACTATTACAGACTCTTCATGA  
CTAGGATTACTTAATGACCGTGCAACAATTTAGCTAACATAACGTAGCCGAGCAAACTGAGCCAGGAGGCGGGCGGGCAG  
ACCTTGGCACCTGCTGCCGGCAAGACAAGAGAGCATCCGACTACCGTGCATGCCGATCGACCACCGTAGCTCAGAGAAG  
AGCGTTGAAACGACGACAACCTCGTCAGTCAGAGAGCCGCGCAATGCGGGCATGGCTATTCTTGGCCAAAACAGCA  
GCCGACCCCCCAATCCACCATTGGCCGGCCATACCATGCGGACGCCTCTCATCTCTCGCCACCGTCTCGCCGACGCGC  
GTGGGTGCGTGCCTGCGCGCGGGGAGCTCCTGAATCCTCTCTCTCCCTTCTCCGCTCCCTTTCCCTCTCTCTCGCTCG  
ACCTCCCGCTCTCTCTCTCTGAAAAAAACTGCGTGCCGGCCAGCCTTTCCCCACTCGCGCGCGCCGGGAACAGG  
GGCGCGCGCAGATTGCGCGCGGCCAATTCACCCGCCGTCGTCAAGCGCTGGCGCGCGGGCTGGCTCCCTGGCACCGG  
CGCGCGCGCCGCTTCCCGACATGGCC

>SsLRR-RLK206

TAGCTAGGGAACCTAGGTAAGTGTGTATGAACCATGAAAACCTAGCCACAAAAGTTTTTCAAAATCGTCAAGAAATTATCAGA  
TGTAGGGACTAGGGAGGCATGTCTATATCTGTGTAAAATGAAACTTGAAGTCCAACCTATTGGCAGGAGGAGAAAACCTTAC  
CACCTTTTTTTTTAAAAAATAATAGAAAAAGATTTTAACTTTTAGCTTCACTAGATTGTCTCTCTAATGTATTGTGATATCT  
TACACGTCAATTAATCCCTTGTTACTGTCTTGTGGTTGTGGTCTATAAAAGCATGAAGCAATTTTGTGCAGTCAGCTTTTGGTT

CGGTGCCCTGGTAAGGTGAAGCAATTAAAAATGATTTATGTTTTGTAAAATTGCATTGGACAACCTTTTTGTAGCTTATAGTCC  
TCAAGATATTTCATATCAAAGCTTAGACTGTCTAACTTTTGAAGGACCTGCTTAAAGCCTCTTGTCTGTATTTTTGGGAAAACCTT  
TCGGCATACATATAGTTTTTCATGTATAGTATCAATTAGCCAATGTTTGTAGCAAAATGAGCATCAAGTCGCCAAGTAACACAATATT  
GCATTGTTTGATAATACATGCACAATCATGTTAGACAGATGGTTTGTCTTAAAGAACTCATTATGTTTCATCGAACATACATTTGT  
TCCTGGTGTGCGAAAAGGATTATATTTTATGCTGCTCTGAGCCAGCACAATACGAGTTCCTATAGTTCAAAGTTCCAACCTCTG  
ATGATTTCTTGTCTCTTTGTCTTGTCTATATTTTTGCTGCTGCCTTACTTTCTTACAATATATTTGTGTAGAAGGGCAAGAGA  
CCGGGACAAGTATTGAACCCCAACAAAAGCCAAAATATTGCATGGGAGCTGGCAAACAAGTTACACGAGAACCGCGCAGCATA  
TCCACACCATACTGAACGAAGAGGGCCGACCAAGATGGTGGCCAGAACCATGCTCTTGGTGGTTTGATGCTGCCTGATGCAAT  
GGAGGCCACCCGCCAAAAAGCCGATGAGCTGATCAAGTCGCTAGGCGGGCTTGTGAGCTACCTGAACCAATTCACCGAGCT  
GGTCAAGGAAACTGGGTTTGAGAACATCGCCGGTATGACCTGATGCACGAGACGCAGCCACGAGGCCCTCTTTGGAGGAT  
TAGATGATCATGCTGCTTAATGTTTTAGCGCTGTAGTTTCTCTGTGTCGCTCCATCTTTGTAAATATGCGGCACTGTATGACG  
ACCGCCAGCCCGGGTGGTGTAGGGTTTGTAGCAGACAGTGTAGGTGCCTTGACAGCACCGCTGTACTGGGCTTCTGGCC  
TTGATTAGTGAGATCAGATGCTCACATCTGTTGTCTGGCGTTCCTTTCAGTTCTGGCCCTGAAAAATCCCTGATGATGAGAGAT  
CAGATGCTCAATTTGGTAGCAGTAGCAGATGTTCTCAGATGCATACATATTCACATGTGAGATATAAGATGGGTGGGTGAT  
GAGGCTGTAGTAAATTGGGATTAAACCAGAATGTTGCGAGGTTGGTGTCTTGGGGACATGGCATCTGTTGTTGCTGACAAAA  
ATGAACCATGAACTGGCCAAGGCTAAAACTGCTCTCGCAGCCAACTCCAACCACCAATGACACAGAAAACCGGCCGCGAG  
CAGCAACAGGCACAACAGACGCTGCTGATCTGCCGTCTTCTCCCGCTATTCTTAGGCTCTCTACCTCCCTCCCAACCCG  
GCGTCGCGACCCATCACCGCATTTCTCTCCCGCCACCTCTCTCTCCCTCCATTCTCTTGACCCATGCACACGCGGGACG  
CGTAGCTTCGCCCTCGCTCTCTCCACGACGACGCGCACGGGCGTGCCTGCATGCGGCGAGCGGTACAGCCCCCTCCGGCA  
AGGCGACCACCGCCGCGCGTGAAGACACCGGCTCGCCTCGGCTCGGTTTCATCTCGTCTCGTCGGACGACTCGCTCGGC  
CCGCCGCGTCCCCA

>SsLRR-RLK230

ATAGCTAGGGAAAATAGGTAAGTGTTGATGAACCATGAAAACTAGCCACAAAAGTTTTTCAAAATCGTCAAGAAATTATCAG  
ATGTAGGGACTAGGGAGGCATGTCCTATATCTGTGTAAGTGAAGTGAAGTCCAACCTATTGGCAGGAGGAGAAAACTTA  
CCACCTTTTTTAAAAAATAATAGAAAAAGATTTTAACTTTTAGCTTCACTAGATTTGCTCTCTCTAATGTATTGTGATATCT  
TACACGTCATTTAATCCCTTGTTACTGTCTTGTGGTTGTGGTCTATAAAAGCATGAAGCAATTTTGTGCAGTCAGCTTTTGGTT  
CGGTGCCCTGGTAAGGTGAAGCAATAAAAATGATTTATGTTTGTAAAGTTGCATTGGACAACCTTTTTGTAGCTTATAGTCT  
CTCAAGTATTCATATCAAAGCTTAGACTGTCTAACTTTTGAAGCACTGCTTAAAGCCTCTTGTCTGTATTTTGGGAAAAC  
TTTGGCATAACATATAGTTTCATGTATAGTATCAATTAGCCAATGTTTGTAGCAAATGAGCATCAGTCGCCAAGTAACACAATATT  
GCATTGTTTGATAATACATGCACAATCATGTTAGACAGATGGTTTGTCTTAAAGAACTCATTATGTTTCATCGAACATACTTTGT  
TCCTGGTGTGCAAAAGGATTATATTTTATGCTGCTCTGAGCCAGCACAATACGAGTTCCTATAGTTCAAAGTTCCAACCTCTG  
ATGATTTCTTGTCTCTTTGTCTTGTCTATATTTTTGCTGCTGCCTTACTTTCTTACAATATATTTGTGTAGAAGGGCAAGAGA  
CCGGGACAAGTATTGAACCCGACAAAAAGCCAAAATATTGCATGGGAGCTGGCAAACAAGTTACACGAGAACCGCGCAGCATA  
TCCACACCATACTGAACGAAGAGGCCGACCAAGATGGTGGCCAGAACCATGCTCTTGGTGGTTTGATGCTGCCTGATGCAAT  
GGAGGCCACCCGCCAAAAAGCCGATGAGCTGATCAAGTCGCTAGGCGGGCTTGTACGTAACCTGAACCAATTCAGTGCAT  
GGTCAAGGAAACTGGGTTTGAGAACATCGCCGGTATGACCTGATGCACGAGACGCAGCCACGAGGCCCTCTTTGGAGGAT  
TAGATGATCATGCTGCTTAAACGTTTGTAGCGCTGTAGTTTCTCTGTGTCGCTCCATCTTTGTAATATGCGGCACTGTATGAC  
GACCGCCAGCCGGGTGGTAGGGTTTGTAGCAGACAGTGTAGGTGCTTGACAGCACCGCTGTTCTGGGCTTCTGGC  
CTTGATTAGTGAGATCAGATGCTCACATCTGTTGTCTGGCGTTCTTTCAGTTCTGGCCCTGAAAAATCCCTGATGGTGAGAGA  
TCAGATGCCTCAATTTGGTAGCAGTAGCAGATGTTCTCAGATGCATCACATATTCACATGTGAGATATGAGATGGGTGGGTGA  
TGAAGCTGTAGTTATCTGGGATTAAACCAAAATGTTGCGAGGTTGGTGTCTTGGGGACATGGCATCTGTTGTTGTGACAAA  
AATGAACCATGAACCTGGCCAAAGGTAAACCTGCTCTCGCAGCCAACTCCAACCACGAATGACACAGAAACCGGCCGAG  
GCAGCAACAGACACAACAGACGCTGCTGTGCTGCCGTCTCTTCTCCCGCTATTCTTAGGCTCTCTACCTCCCTCCCAACC  
CGGCGTCGCGACCCATACCCGATTTCTCTCCCGCCACCTCTCTCTCCCTCCATTCTCTTGACCCATGCACACGCGGGA  
CGCGTAGCTTCGCCCTCGCTCTCTCCACGACGACGCGCACGGGCTGCGTGCATGCGGCGAGCGGTACAGCCCTCCGG  
CAAGGCGACCACCGCCGCGCGTGAAGACACCGGCTCGCCTCGGCTCGGTTTCATCTCGTCTCGTCGGACGACTCGCTCGG  
CGCCGCCGCGTCCCCA

>SsLRR-RLK420

CCTGTTTGTTTTCGCTTATAATCATTTGTACCATGAGAATTTTTTTCGATTCTCGGTTGTGCTAGTTCTAAGTTTCAAAACGGCA  
GCTAGAAAAATAAAAAAATCAAAGTGTTTAGTGGGATTCTCGCTTTTTTCATCGATAATCTAATTGTAATGAAAACAAATA  
GTTTAGTTTTGGGCCCATATTTAAAGTTCCTTTTGAATGGTTCCTCTTATTTTCAATGAAGACTGTTTTTTAGGCACCATAAA  
ATTCTCTATAGAGACTGTTTTTTTTTTTGAACCTTCATTGAATCAGAAATTGAGCTAAACCTAGATATTTCAACAAAATCGCT  
ACATATATATGAATATTTTGTAGCAGAACGTCGTCACGCGTGATCGAAACCAAGGTACACGCCGATATCCTTATATAGA  
GCATAAATATGTCGCCGGAACACGCATAGCTAGTCGTGATAGTAGCTAGGGAACAAAGCATTTTACTCGCGGCATATCCCGGC  
AAAAACATCTGCTTCGGCTCCCATACATCGCATAACATAAGGACACACCCCTCGTTCTCATCGTGCAATTTCTGTTAACCCGGAT  
GCAGAAATGCAGAACTGGCCAAAGGTAAACCTGCTCTCGCAGCCAACTCCAACCACGAATGACACAGAAACCGGCCGAG  
CGCACGAAGCTGGAAGCCTGGCTTATCTGAAAGCCTGAAACGTGAGGCCACCGTGCCGTCGTGCGTCTCGTTTATTCCATCA  
TCAGGACACACTAAAAAATAGCTATGGATTGGGTGCAAGCTGCAAGGTGCAAGTGCAGTACGGTTCCCGTTTACCTTAGCGTCG  
GTTGCTCGTTTGGTAGGTAGTAGACGGTGAGTGTGCATCGGTTGAAAAAACGAGTGCGAATGCACGGACACCAAGGTACCG  
TTTAGATGCCAAAAATTTTGCCAAATTTTTCAGATTCTCCGTACATCGAATCTTTGACGCAATGTAAAGTATTAATATAGAT  
AAAAAATAAACTAATTACACAGTTTAGACGAAATAGACGAGACAAATCTTTAAACCTAATTAACCTATGATTGGATACTAA  
TTACCAATAACAACGAAACTGTACAGTTACATTTTCGCCAAAAATTTTGCCAACTAAACAGGCTCCAAGTGAACGCTCTCC  
ACAGGTCAGACGACTCTTTTATAGCTCTGCAAGGACCGCATGCAACGTGTACACAGAAAGTTGTCTGTGACGCTCGCGT  
GGCAATCTCACACCGCTGTCGGTTCGCTGTTTGGCTAGAGAAAAACTATAAATTATCTCTTGTAAGTTGTTTTTAAATTGTACTA  
TTTGTGTTGTGTAATAATTACTGTCCCAAAAATCTTAAAAATTCGATCGGACACCAAGAATATAGCGACTCTTTAACTTTATGCT  
TACATTTCTCTTTCGGAGCACGTCGGTTTCACTTCACCGCTCGATTGCGAGTGCTACGGGCACAACAGCTGCTTGAATGAAA  
AGTACTGATTTTTGCGTGAGCTAGTTCCAAACCGCCTGTAAAAAAGGTACCCCATTTCCCGCTGTAAATGACAGTGAAAAAC  
TTAGGGTCCAATAGAGAAATGAGAAGAAAAGTTGAGCTGGGTTTCAAGTTCGTCCTCTCCGCTGGCACCAGACTTGCGTC  
GCTGATGAAATCTTCAGAAGCTTCGAATACTAGTATACTACTTCAATTTGTTACTGATGCGGTCTACTCTTAATCAACAGCTGAC  
AGCCTGCGCGAGCGAACGACGCAACAAGAACGCTTCCGCTGCGAGCGGCGACTCCCAAACGCGCCGCGCTTAGGTAAC  
GCAGCCCGCGCCCTATTCTTAGCTCGCCACGAGGCGCGCGGGAGCCGTGTCGCTGTCGCGCCGCGCCCTCTTGGCG  
CATGCGCACCTCTCCACCCCTTCAGCACGTCGCGCGCACGCGTAGTGCGCGCACGCTTCCACGACGCCCCACGCATCCGT  
CTCCGCTCCCGCTCC

>SsLRR-RLK408

TAAGAAGGGGGGAATGTTAGGGACTACCCTAATTGGAATTTCTTTTGGATAGTTCAATTCAGATTATTTCAAAATCTTATTATT  
TGTTTGCTTACAGACAACCCAAACAGGTTATCCCTTACCTAGAATTTCCCTCTCTCTACTGTTCTTCTCTCTCCCAACCTT  
AAGTTTCCACTGCTGATCTTCTAATTCTCACCTCTCTCTGCAATCCAGTACCAGGTTGCTAAACATCATCCGTCGCTGCTCTCT  
GTTTGTTTTCGCTTATAATCATTTGTACCATGAGAATTTTTTTCGATTCTCGGTTGTGCTAGTTCTAAGTTTCAAAACGGCAGCT  
AGAAAAATAAAAAAATCAAAGTGTTTAGTGGGATTCTCGCTTTTTTCATCGATAATCTAATTGTAATGAAAACAAATAGTT  
TAGTTTTGGGCCCATAAATTAAGTTTCTTTTGTAGTGGTTTCTTATTTTTCAATGAAGACTGTTTTTTTTTAGGCACCATAAAAT



TTCTCATAGAGACATGTTTTTTTTTTGAAACTTCATTGAATCAGAATTGAGCTAAACCTAGATATTTCCAACAAAATGCGGTACA  
TATATATGAATATTTATGCTAGCAGAACGCTCGTCACGCCGTGATCGAAACCAAGGTACACGCCCGCATATCCTGTATAGAGCG  
TAAATATGTCGCCGGAACACGCATAGCTAGTCGTGATAGCAAAAGCATTTTACTAGCGGCATATCCCGGCAAAAACATCTGCTT  
CGGCTCCCATACATCGCATAACATAAGGACACACCCCTCGTTCTCATCGTGCATTCTTGTTAACCGGATGCAGAGTGCAGAAT  
TGCAGACAACGACTTCGCGGATGGCATGCTCTCGCCCCGCTCGCCGAGATCGTGGCCGCGACTCGGGCGCACGAAGCTGGA  
AGCCTGGCTTATCTCAAAGCCTGAAACGTGAGGCCACCGTGCCGTGTCGTGCGTCTCGTTTATCCATCATCAGGACACTAA  
AAAATAGCTATGGATGGGTGCAGGCTGCAGGCGCAGTGCAGTACGGTTCTCGTTTACCTTAGCGTCGGTTACTACTGGTTTG  
GTAGGTAGCAGACGGTGAGTGTGCATCGGTTGAAAAACGAGTGCGAATGCACGGACACCAAGTGAACCGTCTCCACAGGT  
CAGACAAATCTTTATAGCTCTGCAAGGACCGACTGAACAACGTGTACACAGAAGTTGTCTGTACAGCTCGTGTGGCAATTT  
CACACAACGTGCGGTCGCTGTTAAATTATCTCTTGTAAGTTGCTTTTTTAATTGTACTATTTGATTGTGTAATAATTATTATCCAAA  
AAATCTTTAAATATTATTATCCAAAGGCTGTGTTTAGATCCAAATTTTGGAGTGCCAAAATACACTGTAGCATTTCTGTTTGATT  
TGGTAATAATTGTCCAACCATTGACTAATTAGGCTCAAACGTTTGTCTCGCAAAGTACAACCAAACCTGTGCAATTAGTTTTT  
GATTTATCCACATTTAGTACTCCATACATGTATCGAAGTTTGATATGACGGGAAATCTTTTTTTTGCATAGTGCATTTTTA  
ATGGATCTAAACACAGCCTTTATGCTTACATTTCTCTTTCCGAGCACGTCGGTTTACCCTGCGATTTCGCAGTGTACGGGCA  
CAACAGCTGCTTGAATGAAAAGTACTGATTTTGTGTGAGCTAGTTCCAAACCGCTGTAGAAAATGTACCCCATTTCCACG  
CTGTATATGACAGTGAAAACCTTAGGGTCCAATAGAGAAAATGAGAAGAAAAGTTGAGCTGAGTTTCAAGTTCGTCTCTTCCG  
CTGCACCCAGACTTGCCTGCTGATGAAATCTTCAGAACCTTCGAATACTAGTATACTACTTCAATTTGTGTCAGCGGTCT  
ACTCCTAATCAACAGCTGACAGCCTGCGCGAGCCAACGACGGCAACAAGAAACACGTGCGGTGCGAGCGCGACTCCCA  
AACGCGCC

>SsLRR-RLK396

CGTCTGGTGGCGCGCGCTGCGTACCCACAGGTGAGGTGACGTGCGCCACCCGGAGCCAGAGGTGGCCTTGACCACG  
TCCTCGTCAAGAGGAAGGTGGCAACGAGGAAGACGTGCAAAAGAGGTCCACGAGCAAGAGGTGCTCCAAGAGCCTGC  
ACGCGGACTCTGCTTGGTGGCCAGCGGAACCAAGAGCTGCGAAAAACGAACAGGGATCTAGCAGCGGAGATCCACCGA  
GGAGAGCTGTGAGAAACAGGGAGAGGGGAGGGTACCGCGACGGTGGATTGAACAGAGATTGGGCGGATTGAG  
GTTGGGGATTAGAGATTGGGGGAGGGGAAAGGGGATACGGCATATCGCCAAGCTTACCACGAAGGGTCTCGGTCTGCA  
CCAACTGGACGCTCTACATATGTCTAGAGATATGTTGATTGAATCAGAATTGAGCTAAGCGTAGATATTTTTATATCAA  
AGGCTTGAGCTAAGGCTTGTGTTGATTCACGAATGTTAAAGTTTAACTCTCATTACATCAATGTTGCGGTAAATGCATGAAGT  
ACTAAATGTGTAAGCAATTTGATGATGTGCGCACAGGATTAAGAGTAATTTACGAGACGAATCTAATGAGCTAATTAGTTTA  
AAATTAACAACTTTTATCAAATAAAACGAAAGTGTTATAATGTTTGTTAACTTTAACACCTCTAACTAAACAGGCCCTAAG  
CCTAGATATTTCCAACAAAATGCGTATACATATGAATAATTATTGGCTAGCAGAACGTCGGCACACCGGTGATCGAAACGAAG  
TACAGCCCCGCATATCTTTGTAGAATAAACATGTGCGCCGGAACGCATAGCTAGTCGTGATAGCAGGAGGAACAAAGC  
ATTTTACTCGGGCATATCCCGGCAAAAAACATGTGCTTGGCTCCCATACATCGCATAACATAAGGACACACCCCTCGTTCTC  
ATCGTGCATTCTTGTTAACCCGGATGCGAGGTGCAGAATTGCAGACAACGACTTCGCGGATCGCATGCTCTCGCCCGCGTGC  
CCGAGATCGTGCCCGGCACTCGGGCGCACGAAGCTGGAAGCCTGCCCTGGCTTATCTCAAAGCCTGAAACGTGAGGCCACC  
TGCCGTGTCGTGCTCTCGTTTATCCATCATCAGGACACACTAAAAAATAGCTATGGATTGGGTGACGGTGCAGGTGCA  
GTGCAGTGCAGTACGGTTCCCGTTACCTTAGCGTCGGTTGCTCGTTGGTAGGTAGTAGACGGTGAGTGTGCATCGGTTGA  
AAAAAACGAGTGCAGATGCACGGACACCAAGTGAACAGCTCTCCACAGGTGACAGCAAAATCTTTATAGCTCTGCAAGGACCG  
ACTGAACAACGTGTACACAGAAGTTGTCTGTACAGCTGTGTGGCAATTTACACAACCTGTCGGTCTGCTGTTAAATTATCT  
CTTGTAAGTTGCTTTTTAATTGTACTATTTGATTGTGTAATAATTATATCAAAAAATCTTTAAATTTTACAGACCTAGAATAT  
AGCGACTTCTTTAACTTTATGCTTACATTTCTCTTTCGGAGTACGTGCGTTTACCCTCGATTTCGAGTGCTACGGGCACAA  
CAGCTGCTTGAATGAAAAAGTACTAATATTTGAGTGAGCTAGTTCCAAACCGCTTGTAATAAAAAATGTACCCCATTTCCACTC  
TGTAATGACAGTGAAAAATTTTATGGGTCCAATAGAAATATGAGAAGAAAAGTTGAGCTGGGTTTCAAGTTCACTCTTCTTC  
GCTGGCACCGACTTGCCTGCTGATGAAATCTTCAGAAAGCTTCGAATACTAGTATACTACTCCATTTGTTACTGATGCGGTC  
TACTCCTAATCAACAGCTGACAGCCTGCGCGAGCCAACGACGGCAACAAGAAAGACGTTGCGGTGCGAGCGGCCACTCCC  
AAACGCGCCGCTCGGTAACGCAGCCACGCAC

>SsLRR-RLK382

CCACAACCTAGTGTGGCTATCAATGGCGGGGAACCGAACAACCCCTATATTTCTTTACGATTTGATTGAATTTCAAATCTAC  
AATCCAAATTTCTAGACCAACTGGTACCCAAAGATGTGCACTTGAGCATCTCGAAGGGTGCAACACAACCTCGTCACGAGT  
ACACACCACAATACCCTAAATCCAAACGACAGAAGAAATAGTTGGTTAAGAGTAGGATATTCAAATCAAACAGTGGGTGAGATG  
ATGAATCGTATTCGGTGAACACAGAATCTTCAAATCAAGCCGGCCGAGCAGGCAACGTGCCACGGCGCAGCCACACCAAA  
GATGTGCGGCACACAACCGGTGCACCAAGAGCTAGTACTAGGCCAATCGCGCCATAAAGAACTGGAGACCGCAATTTGGTT  
GGGTGTTTGGGAACGCAAGATTTCACAGAATCAATTCATTTACATAAAAAACACAGGAACATGGAAAAATTTCCACGCT  
TTCCATTGCTAGGACGTACACGACGCTGGGCATATGGCTTGTGCGGCTATCCGTGCCTTTTTACGGCTGATGAAAAGCTCTT  
AATGTGCACCCATATCGTGTATGCCGCTTATATAAGAAAGAGAAAAGTGAAGAAGGAACGTTTAAATACCTCAGATAGCTA  
GTATAATCATTTCTGTTTCTTTAGAGAAAGGAAGAAACAGATAGTATACCGAAATTTCTTTAGTTATCAGGTACGTAGTATAC  
ACATCATCATGATGATGAGCAAGCAGTGTGACGAGCAGTACGAGCAGCAATCCGAATCTTAATTTCTGCTGATGATTTGCGA  
GACGGAGCCGCGCCATCATGACGAGAGCCGGCTGGATGATGAAATCAAAGTGAAGAGCAATAAGGGCGCGTGTGCT  
TAGCCTAAGACCGTGGTTGAGAGTGTGATTAAGCGAGCCTGCCTAAGGACTGACTCGTCTGGTATGCTCTGGTGCATCGA  
TCCATTGCTTCCGAACCAACCCAGGGGGGCCAGGGCTGGCATCGATCAGAGGATCCATCCGCGATCCGGTCCCGTCTCC  
CGTTGACAGCTCTCATGAGATGAACCTCGAAGAAAGCTTGGCGCTCAGTGGAGGCGTGACAGCTGTCTGGTGTGCGCCCTGC  
CACAACATACTGCACAGGAGTCTGTGTACTACCATAGTACGTAGGTGACACTAGTCAGCACGGTGGATGCCTCTGGGTGTCT  
GCACGCAACGCATACACGGCCAAGCGAGCCACAAGACAGCGTGACAGGCCGTAGCAGTAGCGTGCGCCGCGAGCCCGAT  
GCTCGGCCGCTCGGCTGGAACCTGGATTCCCATGATTGCCAGGTGGAGGGCCCATGATGACACACAGGACAGGAGCCCTG  
CTCGGCGTCTGTTGTGCGACGAGCTCACAAGGCCGGCATCCATCCATTGCTTCCGCCCCAGGCTGGGCTGGCACGC  
AGAGTACTACTGTGCCAATTGGGGTAGGGCGTTCCTGCTGTGCTACGATCGATCGATCGATCGGCTGTTCCTTTCC  
TTCCTCAGATTGCATCGAAGCAGCGTCTTTTATGACTGCATCTGGCGCCAGCCGCCGTTGCCGGTCAGCCTGAAAGCGC  
CGTGCATTTCCAAATTCGATGCTAGCTAGCCGTAGCGGACACAACCCAAACCGCTGCGCTCAGGCCCGGCTGCCCGC  
TGGGATCGGAGTTCCGAATCGATCACCAGCTTGGGCGGCTTCCAATCCAATCCGCCCCGCGCCACAGCCACTTCGCCAC  
GCATACATAAAGCCACCCAACCTTGCCACCTCTGCTCTGCTCCGATGACAACCAACCGCCGCCGCTCAAGCCATGCTT  
CGCTCTCCGGCGCGCCCGGTCCACCCAGCCCGAGCCCGTAGCGCTACGTGCCGCCACTCCCACTCTC  
CTCTCCGGCTCTCCCTCTCCACCCATCCATCCAAAT

>SsLRR-RLK361

ATAGAAAAGGTAGCTGTTGTTTGGTTTCTGCTGAGCCGTTGAGAAAGCCACAAAACCTTTTCGGTTTGTCTCTTAATCTTT  
ATGATATAAAGTGCGGCTGTCTTCTTCTCCGCCACAAACTTTGGCAGCGCCACAACCTAGTGTGGCTATCAATGGCGGGGAA  
CCGAACAACCCCTATATTTCTTTACGATTTGATTGAATTTCAAATCTACAATCCAAATTTCTCAGACCAACTGGTACCCAAAG  
ATGTGCATTTGAGCATCTCGAAGGGTGCAACACAACCTGCTCAGAGTACACACCACAATACCCTAAATCCCAACGACAAG  
GAATAGTTGGTTAAGAGTAGGATATTCAAATCAAACAGTGGGTGAGATGATGAATCGTATTTCGGTGAACACAGCAATCTCAA  
ATCAAGCCGGCCGAGCAGGCAACGTGCCACGGCGCAGCCACACCAAAAGATGTGCGGCACACAAACCGTGCACCAAAAGA  
CGTAGTACTAGGCCAATCGCGCCATAAAGAACTGGAGACCGCAATTGGTTGGGTCTGTTTGGAAACGCAGGAATTTACAGA  
AATCAGTTTATTTTACAGAAAAACACAGGAACATGGAAAAATTTCCACGTTTCCATTGCTAGGACGTACACGACGCTGGGC



>SsLRR-RLK175

>SsLRR-RLK154

>SsLRR-RLK182

CGAATAAATTTGTAATGTTTC11TACTAGTTTAGGCTTCACAAATATTGTACTCCCTCCGTTCCAAATTAIAATTGCTTTGACTT  
TTTTTTTGACCCCAAGTTTGACTACTCGTCTTATTCAA AAAAATTTTGTTGTAATATTGTCAAATTAAGTCATTTCTGAAGAA  
CTTCGGTTTAATAAAGCAAGCCACAAACAAAAGAAGTATATTAGCTATTTTTTTGTAATAAGACGAGTAGTCAAATCTGGAA  
TCTTAAAGAGTCAAATGAACATAAAATTTGGAACGGATATTAATTAATGTACTAATGTACTATGTTCTAGTACTGTTTGCTTTGA  
ATTGATAGATATTAGCTTTACATATGTCACGATGGTTTGAATCTGTATATGCATATATGTATGCATATATGTAGTTTGTACACCTA  
ATTTTCAAATCTCGGCTCCGCCGCTGGCTGTGCCTGTGCAGTCTGCAATTCGATTCGATTCATTACAGCCAATCGCTTTGAG  
CCAGTTTTAGTTCCTAAGAAAGAAACTCAAAAAGTGTTACAGTACCCGTCACATCAAAATCTTCGCTCACATGCATGCAGGAGTACT  
AAATGTAGACGAAAGAAAAAATAATACACAGTTTAGTTAGTTGTAATCACGAGACAAATCTTTGAGCTTAATTAGTCTATAAT  
TAACACAAATTGCTAAATAAAACAAAAGTGCTACAGTAACCGAACCTAAAAATTTTCAACCAACTAAACATGCCCTTTCTTT  
ACTTCTCGTTCCCGCCGACCTAATCCGAAGTTTGCCACGCTCTTACCGAGACTTCCGTGTTCATCGACGAGACAGTGGCTTAGA  
GTACTAATCCTTGTCATGCATGATGATGCAGCGGACGTGTAATATTTGGAAGTCTCTGTACAGTACTTGGGAGTGGACGT  
GTCAAGGGGTTCAGGCGCTTGTGTTGAGTTGAATGCAAGGTAATAAATAGCGTATAGCGGGTTGATACGGGATTGGCGTTGAG

GTAGCCGATTGCGGATAGCGGGCGATATTGCGGACGATAAGTTCCAATAATAGCACCCGATAATCCCATATAATTTAAGTACA  
TATATCATGAATAATGAGTATAAATAATTTAAGTGCATATATCATGAATAATTTAAGTTCACAACCGCATGTGTGAGTATTGA  
GGGCGTGAGTGCATAGTGGGCTAGACTAAATTAGGGTTATTTGCTTTCATGCTATTATGGCCGTGCTACGCGCAATTGACGCTGCA  
ATATCAGCCCGCTATTGAGAAATGCGACCACAAAGTTTTCAGAATGCAAAGTTCAAAGCGCTATCTCGTAGCGGTAGCGGCAA  
TGGACCGCTACTGCTATTGCGGATACAATTACGGCCGCTACCACCGCTATTATTAGCTTGGTTGAATGGCTCGCTGAAGCTTC  
AACCCATATAGTGTACATCATCAGATGGATGGTTAAGGTAACCACTAATCAGATGGGATACCAACGTAGGAGTATTACT  
GTAGTATTCTTGGCGCGTGAAGTGTCAAAAACCTCAAACTCAGAGTGCACAAACGGAATCTCAAGCAGATCGGTGCTCAAC  
CACTGTAACAAGAAATTTCTCGCAAAACGAATTCAGGCCTGTTTACGTGGTGAAAATTTTACGTTTGCCTACTGTACTACTTT  
TCATTTTATTAGTAATTTGTGTCCAATCATGAACATAATTAGGCTCAAAAAATTTGTCTCGTGATTTACAACATAACTGTGTAAT  
TAGTTTTTTCTTTTATCTATATTTAATACTCCATGTATGTGCCGTAAAGATTTGATGTGACGAGTAGTGAGCACTTATTAGGTTTT  
TTTTTTGAACATAACATGCTCTCAGAATTTCTATTACGTTCTCTGTTGGATCGCCACACGGTGACGGTGAGACGGCCACCCAC  
CAGCAGCGCAGGGAGCAGGCTCACATGGGAATTGAAGGCGCGGATCGCTGACCGTGCCGCCGCCGCTCACTTGCCGAGCAC  
GCA

>SsLRR-RLK167

CTAATATTAATAATATTTTTCAAATCTAGTTAGCCTTAAGAAAATTTGAGTGCAATTTTTTGGGGACGGAGGGACTATAGGA  
CAACTTGAACCTGATTATTAAGCCTGTTTCAGATAAAACCAAAAAAGTAGTGCCCTCAAGTTAATTATTGACACGGGCTTTTG  
GCAGCAAAAAATAGCCCTAAACAAAGTGGGCTATCCCGAGCTTGGCCCAAAGTAGTGTGGGCTGACACAGTGTAGCATGT  
CTGGTGGGCATGCATGAGCAGAAATTTGGGTCCAAAACGACCTGTTTTCTTTTTCTGGGCCCGGTTAAGAAATTTCTATT  
TTAGAGCAGCAGTTTTTGGTTTCATGTTTTTCAA AAAAAGAGAGAGTTTTTGGTTTATAATACTTCTCTGTGTACGCCGTCA  
TACAGTTTGTCTACTGCTAGAGCATCAGCAGCTGGTATCATGGCTCACCTCCAACATTGCATGCTAGCTGGTATCACAGACTTA  
CAACTAAAATTTGCTTTGCTAAACGGCCAATAGGGTGGTCTCAAGGTGAGTGTATAATAATGTTATTCTTGCAGTGTGTAG  
TGATGTCAGCTGATATAGAGTTCTGCAAAAGTCATTGAGTCTGTACCAGTTTCAGTACTATAGTTATTTGTTCTGAATAGTGT  
AGTTGAATAGTTGGTTAGTGAAGGCATGAAGATCGGGAGATGACTGCTCCATAGAATACATAGTCGAGGCTTTGTGCAACA  
TGTTTCCATGTTTATATATCTCATCGAATTTTCAGTATGGGGTGTGGATGAATCATATAATTCATATATACAGGCTGTGCGCT  
AGACAAGCGAACAGCGAAGCACAAAGGATTTCTTCTTTGTGCTTGACTATATGCTAGGAATAGGAGTGAATTTTTTACTAATA  
CTACTGGCCTGTTCCTAAGCTAATAATGTGGCAACTTTGTCTAGACTGTTTTCTCCAGCAAAACAACAGTTTCAGCGTAGCT  
AAGCCAGTGATGCAAAAGAGTAGCAGTAGTCCGGTATGGAGTAGCAGTATAGTCCGTGATGTAACCTGGCTTGACACTTCTC  
TTTAACTGTTTATATATCTCATCGAATTTTCAGTATGGGGTGTGGATGAATCATATAATTCATATATACAGGCTGTGCGCT  
CCAAGGTGAAGAATTTGGTCTGATGTATCTTTTATGTTGAGTCTTTTTTATTGTTCTTATAGCTCAGCTAACTCTAAAGATGA  
TGGTGACATCATGGCCGAGGATGATAATTTAAGTACACGCATGACAGACACTGTTTGGACTGAGGCTGAACTTAGGCATC  
TAAATCGGACACCGAGAAACCTGCCGTCCAAGCTGCTTTTATAGTTGCTAATAACAGGCCATAGTCTATTTTTTTAAGC  
TGCTTTTTAAAGTTGCTAACCAAAACAGGCCCTGGAGTTCCATTTTCCAGTAACATAACAAGTTAGGGGCTAGATGTTGTGCG  
GTAGCACAACCAATAGCATTATAGAAATAATGTCATGTTAACTTCAATTTATCTTTTAGGTTCTGTTTATTGGAATCCAATCCT  
TCGAAATATTACTTGTAGATGAAAAATTAGTTGCAAACTATTTACCTCATTCCATCCTAATATGTTAGGATTGGGTGTAGTGA  
AGTACAACATACTAAGCCTTCAAAAATTTGTAATGTATTGTAGTGACTTTTCGATTGGCATAITTTGTAATTTGGGATCAAAT  
TAACATGCAAACTTGTANNNNNNNNNNNNNNNNNNNNNNNNNNNNNNNNNNNNNNNNNNNNNNNNNNNNNNNNNNNNNNNNN  
NNNNNNNNNNNNNNNNNNNNNNNNNNNNNNNNNNNNNNNNNNNNNNNNNNNNNNNNNNNNNNNNNNNNNNNNNNNNNNNN  
CCACGTGGAATTTCAAGCTTCAAGCCTGCGTGCTAGTCCATCATCATATGGATGGTTAAGGTAATCACTAATCAGGTGGGAT  
CACCACGTT

>SsLRR-RLK195

TAAGAGTTAAAGGCCATGTTTTCTGTTCTCCCGTTACCACCTAGCTGGCCCGATCTGCTAGCCCAAGAAGGGAAGTCA  
CGAGAGGAACACAGAGCTGAGACGCACCTCTCCCGTCCGTTGCTCGCGTCCAGCGTTTCGTCGCCCTCTGGTTCCGACTCGAA  
CACTAATCTGCTGATTGTCATGTCATCATCAATCCCAAAGATTGCTGATTGTCATGTCATCATTCAGTCCCAAAGATTCTCT  
GCTTCTTTGACAAAGGCAAACTCAGTAAAACTCGTAAAGTTTATCCCAAAGACTTCCCAATCAGTACTTGAGGTGTCTAA  
CCTATCAGCTTGGTAACTTTATTGCTGATATACGTGGTGTAAAGATTAAACAAAGTGAAAAATATTGCCAGTTTCAGCT  
TTACTTGTGCAAAACAAATAAGCATGTCTTACACTTGTATGTCTACAAGCTTCTGAAACTAGTCTTATTGCTACCGGTTGCAACT  
GCAAGTGTGAAAAAGCATTTTTCAGTGATGAACTCCGTAAAGAACAAGTTAAGAAATAGCATGGGAGATCATTACTTGAATG  
ATTGTCCGGTTACGTTTCATTGAGAAGCAATTTTTCTATGTGTGCTGATGAAGACATCATCTCTCGATTCCAAAAGCCGCC  
TGTGCAATAAAATTTGTAATGTTTCTTTACTAGTTTAGGCTTACAAAATATTGTACTCCCTCCGTTCCAAATTAATTCGTTTGA  
TTTTTTGACCTCAAGTTTAACTACTCGTCTTTTTAAAAAAAATTTGTGCAAAATATTGTCAAATTTAAGTCATTCTGAAGA  
CTGTTAATAAAGCAAGCCATAACAAAATAAGTAATATTAGCCCAAATTTTGAATAAGATGAGTAGTCAAATTTGGAATCT  
TAAAAGTCAAACGAATTAATTTGGAACGGATATTAATTAATTTGTAATGTAATGTAATGTAATGTAATGTAATGTAATGTAAT  
TGAATGATGGATATTAGGTTTACATATGTCACGATAGTTTGGTCTGTATATACATATACGTAAGTACACCAATTTTCAATTCCT  
GCGTCTGTGCACTGTCAATTCGATTGATCCATTCACAGCAATCGCTTCTTTACTTCTCCTCGTTCCCGCGACCTAATCC  
GAAGTTGGCCAGCTTCCGTGTTCACTGACGAGACAGTGGTTAGAGTACTAATCCTTGTGTCATGATGATTGATCGACGGACGT  
GTAAAATGTTGGAAGTCTGTACAGTACTTGGGACTGGACAGCTGTCAAGGGGTGACGGGCTTGTGTTAGTTGATGATGTTG  
GCTGAAGCTTCAAGCCTATGTGCTAGTCACATGATCAGATGGATGGTTAAGGTAACCACTAATCAGATGGGATACCAACGT  
AGGAGTATTACTGTAGTATTCTTGGCGCGCTGACTGTCAAAAACCTCAAACTCACAAGTCAACGGAATCTCAAGCAGATC  
AGTCGCTCAACCACTGTAACAAGAAATTTCTGCAAAACGAATCAGAATTTGTTGTCAGTCTCTGTTGGATCGCCACACGG  
TGAGACGGCCACCCGCGCAGCGCAGGGAGCAAGGCTACATGGGAATTGAAGGGCAGATCGCTGACCGTGCCGCGCGC  
CGTCACTTGGCGAGCAGCGACCGCGGTAGCCGACACCGCGCGCTCCATTCTCGCTCCCTCAGTCACATGCGAATGCGA  
GAGCTGCGGCAGGACAGCTCAGCTCTGCTCCCCAACCCAAAGAAACGCACCAAAAACGCCCTCCCGACCCCAAACTCTCT  
TCGCTCGCTCTCGGCGGCACTCCGCTCTCCCGCACTCGCACAGACCGGACGCGGCCACGCTAAGCTAGCAGAGCTACCT  
TTGGCGCACCTCTCTCTCGGCCCTCCCTCCCTCTCTCCATTCCGACGCGTTCTGTTTCTGCTCGCTCAGATCCAAGCGAGGAG  
AACGAGCTGGGGTAGCCA

>SsLRR-RLK145

AGCAAGCAACTAATTAACCCTAACGGGCTAAGGCCCAATAGGCCCTTGACTCTTCTAACACTACACCCCACTGGACATGCA  
GCTCGTCTCGAGCTGCAACTTAACGATGACTCTGCTAGACATAAACTTAACACCTAAAAATAAGCCTTTTACATCTCGGCTT  
ATTTTATTGACCTGAAATAGATTGCGACTCTTATTTTTTATTTTGGAGATACGATGGACACCCCTCTCGTAATGGACATGCA  
GTGTATAGCCACCTGATCCCATGGAGCCACCGGAACGAGGAGTGCACGGGTATAGCCACCGAATTAGTCGCGATAG  
CGAATAGCGGAGACGTCTCTCGGGCGGCCGGTGGCCGAGCAGGCAGCGCTAATTAAGGTCCGCCTATGGGTGGCCACACA  
CCCGCGTCCCCAAACGCCGCGCTGTAGACACCGAGTTCGCCACCCGAGGTGGCGATGCCACGCCGATCTCCATGACGCA  
CGGACGAGATCGGGGCCCTCCATGTGGCGAAGCGTAGCTGGTGGCGAAGCAAGAAGCACGGGGCACAGGCACCAAGCT  
GCAACCCACGCTCTCCCGCGCTGCCGCGGAGGAGTCCGCGTGTGCAAGCTGTAACCGCACCGCCAGGCTGCGGCTGAA  
GTGGGTATGATCTTTGTCTCCTGCTCCATGCTCTTCTTGAAGTGTAGCAGTTGACAGCACTATCCGCCTTGGCTTGCATCT  
GGGCTATTGTCTGCTCATGTAGGCGTACAGATCTTGGGTGATGGGACAATCGCCGACAGGAGACACTCTCGCCTTTGGGAG  
TCGCAAGGCCATGTTCTTCCGTAGCACAGCTGTGCTGTGAGAGACCGAGCTGCAGGGGTGACATGGCCTGGCGCTTGAA  
GAGGGGGCGTTGGCCACGCCGAGGAAGGATCGACAGCAGCAAAAGCAGTGTGCTGCATATGAAGCAGGTGATCGATGTT  
GGAACAAATCGGCAGCGGAACCTGGCATTAGGGTGGTGGTGTAGGTGCGCAGCGCTGTCTGCGCCACCCAGGCATCCAGT  
AGGGGAAACTCTGGGGCACGGCGCCCGCCGAGGACGACGCTGATGGATCTCCATAGTGGCCAGCCGTGAGTTGAGGTGC

GCCTGCTGCGCGTTGATGTCGGCCAGCGCCTTGGCGATCTGATCCACAGCGGCTCATCGAAACCTGGCATCTCTGATACCA  
GATTGTTATGGACGTCGTTGGGATGGGGAGAATTGAGGAGGAAGAGACCGACGGTGATACAGTACCCGCGCGCTACAGTAC  
CTCCGGGTACTGTTACAGGCTAGAGGCAGAGACCCGGGCTAGGCTGTGAGGGGCGCTGGGAACCGCGCGCGGGG  
CTTTGCCACCGGCCGGAAGAGAGAAGGTTTTCTTCTAATCTCTTGCTTGATTAGATTGATACATCTCCTCTCCTTATAG  
AGAAGAGGTCTTACTTAATCCCTAAGCAAGTGACTAATTAACCCCTAACGGGCTAAGGCCCAATAGGCCCTTGACTCTTCTAA  
CACTACACCCACCTGGACATGCAGTTCGTCTCGAGCTGGGCTAAGGCCCAATAGGCCCTTGACTCTTCTAACAGTCCCAC  
TCCCCACCTATCTAATTTTTGAAATATCTTTGIAATTTTGGGATCCAAGTATTTGATGTAATTTCTGCAATATTGCCAACATGT  
GCAAGATGTGCTCCTCACACTTTTTCTCAAATTTCTCAGGTTCTCTTAATCATCTTTATTTTTCTTGTTAGGAAGTTAGTGATG  
AAAGTATATCAGAGGGCACGAGCTTATGTAATCATGCTTACTATCCTTAATTTCCCTCTTTTGTTATGAACATGATTTTGTGTTATG  
CTCTATTTTCTACTAATTTTGTCTTTCTATATCTGCTAGAGGATTGAAGTTATGATGGAAGTTTGTATAGTAGCGCTGAAT  
CCAGTTCTCTTCAAGCAAGTCTCAACC

>SsLRR-RLK353

GTCTTTAAAAAAGGCAAGAGAATGCACTGGAATTGCGCTTTTGTAGTAGTAGTAGTAGTTGAGCATTTGCAATCTCTACA  
GACTGCACGGCCACTGTTACCTCCGTTTATTGGTGTGCTAGTGATTAGTGAAATACTGCATTCAITGTTTTTACGGGAAAAATA  
ACAGTGTGGTACTGAACTAGTATGATTTTGCACCTAACGTTTCGTGTAAAAAACATGCAACTGTTAGATAAAACAACATCAAC  
TTGAAAATCATGCAATGGAGCAGGTCAGGCATGTAGTATACTGAACTGCACCTTGCAAGCAACATTTATGGGCAATTTCTCAAG  
CTTGATGCATCCATGTGGCCCATGTGGTAGGAGAACATGGGAAGTCTCAGTCACTTTTTTTTTTAAAGGAGACTCTTACT  
GATCCTACCGGTACATCTACTGTTGCAATTGTCTTTTGGAGGTGTCGAGATAGTGATGGATCTTGCCCTCGTTGTGCTCTATGGT  
GTGGAGCCTGAGATCCCTCCTCAGTCTCAATGTGCCGTGCTGCCATGATCGCCCCATAAACGAGCAGAGCCCCACACC  
CCTGCTGCAAGCCCTCTCCCTTTGGTTTCTTGCACTGAGACCACCTGCTTTACGTGACTGCCTTTTCCCAAAGCATTTTG  
TGCCATGAGAAAAACAATGGTATTAGGTGTAGTTATTGGGCTAGGTTAGGTGCCCTGCAATGCTGCTTTTGTCTAAGTTACAC  
ATGTGCAAGAGAGTCCACCAACGTGCTGTGCCCTCACCTACCAGGGGTAATGTTTGTGCGCCATCCTTGTGTCTGTT  
CTGGTTATGACCAGGAGCCATTGTTAGGCGTGGTGGTTGTTTGTAAACACAGTGGAGTTATCCTTTTCAGAAAAGGGTA  
AAGAGTGAAGTACTAGTACTAAAAGATGTGTTGGTTTCTTTTATATGGCACATGATCCTAGCTGTCTTTTCAATAAAGAGATT  
TGAGATAAACCAAGTGGATTGCTTTGGGTTCCGGCCTTTCCGTTGAGGCTAAGGAGAAGACAAGATGTGTCTATTCTGGTTTCG  
TTTCGTTTACTAATTTTTCAGAGAGGAGATTGCTGTGTAGCAGTTGAGGAATGTGATGTTCCCTTGAAACATCAATGTGGGCC  
GCATTTGTCAATTGTCTCATGAATTTACGATTCAATCCAAGAGTGACCTTCCACCAGCCTTCTCTCATTGACGTGAATTAGTTA  
TGATGTAAGTATAGGACTTGTCTCATTTATGATGAAAGATGGCAAGGACAGTGGCAATTAATAATGATGGAATCTCTTAA  
GAAAGTCGTATTTATATTTACTGTCTGTGTAAGCTGCTTGTGTTTCTGTTGGAGCTGATGCACCAACTTCGTAACACTATGGGT  
CAAACCTCTATCGGCCCTACAATAGTGGCCATTCTGTAAAGTATATTTGCTATTATTCTTTAGCAGGTGGTACGAGAAAACTTGT  
TTTTTTAGCATGATCGTGAATGTGATATTTAACGAAGGAAATGCCAGGTTTACATTTAACTTAAGAAGTGGTAAATGCTTCT  
ATAAGCTGTTAATTGATGAAATTGCATCCGATTGTACATTAGAATTGCTCAGCTTTTTTGGTCTATCTAGATGATCGAAATTAT  
AAAATGAGTTACTCCTCCTTTACCTTCTGTGGTTTCTGTAGCTGTTTACTTGTTTGTTCGAGAGTATATAAATGTCCACCGGA  
AAACTTAAATCTTTTATGCTTGTATCCACATTCACATTCATGTTCTATGCTTCCACATTCACATTCCTTTCTCTTCTACCATGT  
TTCTATGCACCGCACTGAAATTTGACTGTTCTTATTATTCTTAAATTTGGACCATTATGATTGCTGACTTTTGTAGCCTTTT  
ATGTGTCAGGAGTGATGCACATGCACTGATGAGGACTCTGGATTATAACTGGTTTCTTCTTCTTCCAGCCAATCCCAACAA

>SsLRR-RLK376

ATACGGGCGCATGGGAAGTAGAACTAGAAAAAGGAAGACGAACATGTGCGCCCAATTGGCACGATGACACAGTTGCTCA  
TCATGAGCTCGAGTACATGGAAGACCGAGCTACGACTGAGCTGTATCAGGGCATCACGTCCAGGATGGCCGAGGCGCGGT  
GCCAGGTAGTAGAGGAAGTAGAAGCGACGAAGGCAGCTGACAAAAACGGGCGGCGAAGAAGACGAAGGAGCCGCCGGGA  
AGCGAAGGGGTGAAAGGGTCCCGGTGCTGTACATCGGAGCAGAGGACGCCAAGAAGCCAAATCCTTTACAGTAAGACCA  
GAAGAGTCAAATTTCCACAGAACAAAGATTGTACAGCTGTAAAACGTGCAATAGAAAAGAAAGATTAGAACCATAGAAGGAGCA  
ACAAGAACATCAGGAAGACGAAGGAGCCATGAGCATCGGCGGTACCCACAAACGAGACTGGAATACAAGAACCATTGT  
GACCATATGGACAGGAAGAGAGAGGAAGAGGAGAGTGAATAGACGAAAGTATACCGGGGTGAGGAGTAGTGTGTTAGGT  
GGCCCCGATCAGCATCCACTCGGGTCCGACCGGAGGTGTCAGGCCCATGGTGTGTAACGAGCAGGAGCCGCGCT  
GGTCCCAGCCGTTGACCCCGGTGGAGTCCCGGAGGGTGAACCCACGGCGTAGCAGGGAAGGCGCCGGGTGGAGGACC  
AGCAGGAGGAGCTCCGGTGAGCATGGCCACCGGTGGACGAGTGTGCGCCCGGGGCGTGGTAGGGCCACATGGAGATGCG  
ACCGGACCAAGGGTTCTGGAACGAAGGCCATGGTGCCCCCGTGTGGCCAGCCGGTGCCGGAGCCTGGGGGTGACCCCC  
GGCCACCCCGCGGCCCTCCACGGCGACGACGAGAGCCACGACCCCCACCTCCGCTCGGCCCGGAGGAGGAGGCCCA  
GGAGAGACGACGGTGGCGGAGCGGCAGCCGCGGTGGAGCAGGAGGACGCGGTGGAGTAGCTGCCAGAGCCGTCGAGGAC  
CCCCGAGAAGCGGCAGACCCGGCTGGATCCCTGCGTGAAGTCTCCATGACGAGATCGTACGGACCTCCAGGAAGGTGG  
GGAAGGCGCGTACGCGTGATCCACGTCCGGAGGTGGGCAATCCGGTCTGAGCCCCGAAGCGTTGAGGACCAAGATG  
CGATCCTCCACGGGCCACCGAGGTCCCAAGGGAGTCCGCCATGCCCTTCATCCGACGGCAGAACTCGCCAGCAAGAGTCA  
CCCTGGACGAAGGTGCGGAAGCTCGCATCGAGACGAGAGCCCGGCGCTCGCGTTGCCAGGAACCTGGCCCTCAAGGGCA  
AGCCACGCGCCGCGCGCTCAGGGGAGGTGCGGACGAGGTGCTGGAGGTCCAGAGAGATCGTCCCCAAAGATCCAGGAGA  
GGACAGTCTGTGCGAGCGAGCCACGACGGCGTGTGACGGCGACCGAGGCGTGCACGAGGACGCTGCTGCGGCG  
GTAGCGGCGAAGAGTGAGANNNNNNNNNNNNNNNNNNNNNNNNNNNNNNNNNNNNNNNNNNNNNNNNNNNNNNNNNNN  
NNNNNNNNNNNNNNNNNNNNNNNNNNNNNNNNNNNNNNNNNNNNNNNNNNNNNNNNNNNNNNNNNNNNNNNNNNNN  
NNNNNNNNNNNNNNNNNNNNNNNNNNNNNNNNNNNNNNNNNNNNNNNNNNNNNNNNNNNNNNNNNNNNNNNNNN  
GATGATCGAAATTATAAAATGAGTTACTCCTCCTTTACCTTCTGTGGTTTCTGTAGCTGTTTACTTGTTTGTTCAGAGTATAT  
AAATGTCCACCGGAAAACTTAAATCTTTTATGCTTGTATCTCCACATTCACATTCCTTTCTTCTTACCATTGTTATGCAACGA  
ACTGAAATTTGACTGTTCTTATTATTCTTAAATTTGGACCATTATGATTGCTGACTTTTGTAGCCTTTTATGTGTCAGGAG  
TGATGCACATGCACTGATGAGGACTCTTGGATTATAACTGGTTTCTTCTTCTTCCAGCCAATCCCAACAA

>SsLRR-RLK354

CTTTTGTCTTTAAAAAAGGCAAGAGAATGCACTGGAATTGCGCTTTTGTAGTAGTAGTATTAGTTGAGCATTTGCAATCTC  
TACAGACTACACGGCCACTGTTACCTTTCCGTTTATTGGTGTGCTAGTGATTAGTGAAATACTGCATTCAITGTTTTTACGGGA  
AAATAACAGTGTGGTACTGAACTAGTATGATTTTGCACCTAACGTTTCGTGTAAAAAACATGCAACTGTTAGATAAAACAACAT  
CAACTTGAAAATCATGCAATGGAGCAGGTCAGGCATGTAGTATACTGAACTGCACCTTGCAAGCAACATTATGGGCAATTTCT  
CAAGCTTGATGCATCCATGGCCCATGGGTTAGGAGAACATGGAAGTGTGAACCTCTCAGTCACTTTTTTTTAAAGAGGAGCTC  
TTACTGATCCTACCGGTACATCTACTGTTGCAATTGTCTTTTGGAGGTGTCGAGATTGTGATGGATCTTGCCCTTCTTGTGTCCT  
ATGGTGTGGAGCTGAGATCCCTCCTCAGTCTCAGTGTGCGGTGCTGCCATGATCGCCCCATAAACGAGCAGAGGCCCC  
ACACCCCTGCCTGCAAGCCCTCTTCCCTTTGGTTTCTTGCACTGAGACCACCTGCTTTACGTTCTGGACTTTTGGTTTCTGTG  
CTGACTGCCTTTTCCCAAAGCATTTTGGTCCATGAGAAAACAATGGTGTAGGTGTAGTTATTGGGTCTAGGTTAGGTGCCCT  
GCAATGCTGCTTTTGTCTAAGTTACACATGTGCAAGAGAGTCCACCAACGTGCTGTGCCTCACCTACAGGGGTAAT  
GTTTTGTCCGCTGTTGTCTGTTCTGGTTATGACCAAGGACCATGTTTAGGCGTGGTGGTTGTTTTGTTAAACACAGTG  
GAGTTATCCTTTTCAAGAAAGGCTAAAGAGTGATGGCTACTAGCTAAAAGATGTGTGGTTTCTTTTATATGGCACATGATC  
CTAGCTGTCTTTTCAATAAGAGATTGAGATAAACCAAGTGGATTGCTTTGGGTTCCGGGCTTTCCGTTGAGGCTAAGGAGA  
AGACAAGATGTGTCATTCTGGTTTCGTTTCTGTTTACTATTTTTCAGAGGAGAGATTGCTGTGTAGCAGATTGGAATGTGATG  
GTCCCTTGAACATCAATGTGGGCAGCACTTTGTCAATTGTCTCATGAATTTACGATTCAATCCAAGAGTGACCTTCCACCAG  
CCTTCTCTCATTGACGTGAATTAGTTATGATGCAAAGTATAGGATCCTTGCTCATTATGATGAAAGATGGGCAAGGACAGTGG  
CAATTAATAATGCTGGAATCTCCTAAGAAAGTCGTATTTATATTTTACTGTCTGTGTAAGCTGCTTGTGTTTCTGTTGGAGCT

ATAGTTGCTAGGTTTCAGTGAAAAGTTTTCCATGGTGCAATTTTTTCCCCGTAATTTTTTGGGTGCATATGAGTIGCCAATAATCA  
GTGTGACGAGCCGAAGGTTCCACAAGTGTTAGTACTCGTTTCAGITTAACCTGTGACCAGCAAAAACATCGTAGCAGTGACAAG  
AAAATTGAAAACCGAGGTTAGTAATTCGCATGACTGATACCTGTTTGTAGTCAGTAATAATCATTTGTTAGGAGTGGAAGAGCTG  
CGAAGTCGTGAACCATGAGCATGAGCCCCGCGAAATCATGTCTTTAGCATTTGGGTCTGAGGAGCACTACTGCCACAGTGT  
GATTGTTCTCTGGAATTAAAAAAATGTGATGCTTTTAGGTTGAGATTAACAACACTGGACACTAACCAAGATCTTGTAGTCAGT  
AAACAATCTGCAAAGTTGAAAACCAAGTACGTCCAGTAGTTGCATGTACAGTTTCACCCCGGCTAATCTCTCGCAAAAAATTT  
ACCTTTGTCACTGCCCTACCATTCCATGTGCACATGTTTACTAGGCTGGAGGTTCCGGCTCCTTTGTCCAAAAGCAAT  
TCAGAATCGCCTTTGTTTGGCCCACTTTTCTTCACCTTTTTAGTGGATGTAATCTCTTAAACAAGTACTGTTCTGTAGTGGC  
CACTGCCCTATCGTGGCTGCACATAGTGTATGGGAGGCTCCTCTATGGGCATGGGCATATGCTGCCAGTTTCTTTTCTTTATCC  
AACACGCTGATGGAGTTGATTATTACTTGTGCCCTGGCCCGGTAATGATATGTCGCAAAACTGCAATCTTGTATCCTGGCCCTGC  
GAGCTTAATCTTGTGTTTCTGCGGCTAACTAGCAGCATGCTCTGGTCTAGAGTTTAGACATGTTTTTTCAGGGCTTACTT  
TATTGTTTCAATCCAGAAATCTTGAACCATGTGATTTACTGGTTTTTAGGCGATCACTGTGTTTTTTTTGTTAAACATGCTTG  
TGTTAATCAATAATTTGGTGTTTCAATCAAGAAAGCTATTCATGATGTGATATGCTCTCTTTGAGGCAAGCAAGGGTTGTGCTTTA  
GCCCTGTCTCGCAATGTCTCCTCTTTTTTGTGCTTTTCATGGATGCCTTTAGATAGTGGCCCTACCCATTCACTAATTT  
TGGGCTTCAAATTTATTGCTTTCTTACCCTAACCTTACGCCATCTTTGGATGTAGAACCCTTGCCCTTGTGTTGACTAGC  
TATGGTTTTTTTATTCCCATGATTTAACATTGCTTCGAGGTAAAGAAAGAAGAATCTCTTTAGTAGTTTAGTGAATGGGAAGTGT  
CGGTAAGAGTGAATCTCTCTAGACTGTGAGGGCCCTCAAAGAGCATGATCGAGCAGACATTCACAGTTTATAGTTCACATGA  
GTAATTTCTGCTGCTATCACCATTCTCCCACTATTATTTATCTTTATTGAAAAGCATTTTGATCTAGTTTTGGAACAGATAGCTT  
CTTATAATCTTAGATGACATGTGCTTTTAAAGACACCTTGGATTTTGTAGGTCTGAGCCTCTTGGGGGTAAAGTCTCTCT

GCTGTGGCTTCCATAGCTCAGTCACAGGCACATGCTTCACTGCTTGTGCATACTCAAATCGCACTGTGCTTCTTCTGGGCTC  
AGCACACACATATTTCTTCAGAATCATGATGAGTTAAATACTGATACTAAGTTGTACTTTTCAGTTTCGAAATTTAGCACTAAC  
CTTTTCGTTTTCTCATTGCGAGACTGCTTGATTATTTCTCAGCTTAAACTGATGATGCTGGTGCTCGTTTTAATCAACTTGATTCAG  
AGATATATCAACTATGGGTATCTGAATCATGGAAGGTCTCTCCCTCTACTTCTCTGTCTACATCTTTTGTGGCCACTACTTCCG  
TTTGCTACGGCAGATATAGCCTCCGAGAAGCAAGCACTCCTTGCTTTTGCTCTGCAGTCTACCGTGGCAACAAGCT

>SsLRR-RLK54

AATCTAATGATACTTAATTGGTGTCAATAATATTATTATCTTATCATATAAATTTGGTCAAACCTTGAGATCCTTTGACTCTCCAAG  
ATTCTTGGCCTTATAATTTGGGATGGAGGTAGTAATAATCATTTGTTAGGGAGTGGAAAGCTGCGAAGTCGTGAACCATGAGC  
ATGAGCCCCCTCGCAAATCATGTCTTTAGCATTGGGTCTTGGAGGACTGACTGCCAGTACTTGATTGTTCTCTGGAATAAAA  
AAAATGTGATGCTTTTAGGTTGAGATTAAACAACCTGGACACTAACCAAGATCTTGTAGTCAGTAAACAATCCTGCAAAAGTTG  
AAAACCAGTACGTCCAGTTGTTGCATGTACAGTTTCACCCCGGTTAATCTCCTGCAAAAATTTACCTTTGTCACTGCCCTACC  
ATCCCTAGTGCACATGTTTACTTAGGCTGGAAGGTTCGGCTCCTTTTGCCAAAAGAGCAATTGAGAATCGCCTTTGTTTG  
CCCCACTTTTCTTACCTTTTGTAGTGGTATTCTCTTAAACAAGTAGTTTTTCTGTAGTGGCCACTGCCTTACTCGTGCTGCAC  
TAGTGTATGGGAGGCTCCTCTATGGGCATGGGCATATGCTGCCAGTTTTTTCTTTATCCAACACGCTGATGGAGTGTATTATT  
ACTTGGCCGTGGCCGGTAATGATTAGTCCAAAACCTGCAATCATTTGATCCTTGGCCTGCGAGCTTAATCTTGTGTTTTCTGC  
GGCTAACTTAGCAGCATGCTCTGGTCTAGAGTTTAGACTATGTTTTTGACAGGCTTACTTTATTGTTTCACTCCAGAAATCTT  
GAACCATGTGATTTTACTGTTTTTAGGCGATCACTTGTTTTTTTTTGTGTTTAAACATGCTTGTGTTAATCATAATTTGGTGTTT  
CATTCAAGAAAGCTATTTCATGATGTGATATGCTCTCTTTGAGGCAAGAAGGGTTGTGCTTTAGCCCCGTGCTCGCATTTGTCTC  
CTCTTTTATGCTTTCATGGATGCTTTTCGACTTTAGATGCTGGCCCTACCATTTCAACTATTTTGGGCCTTCAAATTTTCATTGC  
TTTCTTACCGCAACTTCTACCCATTCTTTGGATGTAGAACCCTTGTCCCTTGTGTTGACTAGCTATGGTTTTTTTATTCCCATGA  
TTTAAACTTGTCTCGAGGTAAAGAAAGAAATCTCTTTAGTAGTTAGTGAATGGGAAGTGTGCGTAAAGTGTCTCGTATCTCCTA  
GACTGTGAGGGCCCTCTAAAAGCATGATCGAGCAGACTTTCACAGTTTATAGTTCACACTGAGTAATTCGTGCTATCACCCT  
TTCCCACTTATTATAATTCCTTTATTGAAAAGCATTTTGATCTAGTTTGGAAACAGATAGCTTCTTATAATCTTAGATGACATT  
GTCCCTTTAGAAAGCAGCTTGGTATTTTGTAGGCTGTGACCTCTTGTGGGGTAAAGTGTCTCCTCGTGTGGCTGAGCTCA  
GTCACAGGCACATGCTTCACTGCTTGTGCATACTCAAATCGCACTGTGCTTTCTGCTGGGCTCAGCACACACATATTTTCTC  
AGAATCATGATGAGTTAAATACTGATACTAAGTTGACTTTTCAGTTTCGAAATTTAGCACTAACCTTTTCGTTTTTCATTGCAGA  
CAGCTTGATTATTTCTCGGTCTTAAACTGATGATGCTGGTGCTCTTAACTCAACTTGATTTCAGAGATATATCAACTATGGGTAA  
TCTGAATCATGAAAGCCTCTCCCTCTACTTCTCTGTGCTGACTCTTTTGTGGCCACCCTTCCGTTGTCTACGGCAGATAGC  
CCCAGAGAAGCAAGCACTCCTTGCTTTTGCTCTGCAGTCTACCGTGGCAACAAGCTGAATTGGAATCAAAATATCCCCTG  
TGCTCTTGGCATGGTGTGACATGCTCACCAGATCGATCGCGTATATCGGCCCTTAGGGTGCCAGGTGCTGGTTTTG

>SsLRR-RLK21

CATGCAAGGTTCCACAAGTGTTAGTACCGTTTCAGTTTACCTGTCCACCAGCAAAACATCGTACTCTCTCTAGCAGTGACAAG  
AAAATTGAAACCGAGGTTAGTAATTCGCATGACTGATACCTGTTTTGATCAGTAATAATCATTTGTTAGGGAGTGGAAAGCTG  
CGAAGTCGTGAACCATGAGCATGAGCCCCCTCGCAAATCATGTCTTTAGCATTGGGTTCTGGAGGACTGACTGCCAGTAGTT  
TATGTTCTCTCGGAATTAATAAATGTGATGCTTTAGGTTGAGATTAAACAACCTGGACACTAACCAAGATCTTGTAGTCAGT  
AAACAATCCTGCAAAAGTTGAAAACAGTACGTCCAGTAGTTGCATGTACAGTTTCACCCCGGCTAATCTCCTGCAAAAATTT  
ACCTTTGTCACTGCCCTACCATCCCTAGTGCACATGTTTACTTAGGCTGGAGGTTCCGGCTCCTTTTGTCCAAAAGAGCAAT  
TCAGAAATCGCTTTGTTTGGCCCACTTTTCTTTCACCTTTTTTAGTGGTATGTATTCTTAAACAAGTAGTCTTCTGTAGTGCG  
CACTGCCTTACTCGTGCTGCACTAGTGTATGGGAGGCTCCTCTATGGGCATGGGCATATGCTGCCAGTTTTTTTTTCTTTTATC  
CAACACGCTGATGGAGTTGATTATTACTTGGCCGTGGCCGGTAATGATTAGTCCAAAACCTGCAATCATTTGATCCTTGCTCTG  
CGAGCTTAATCTTGTGTTTTCTGCGGCTAACTTTGCAGCATGCTCTGGTCTAGAGTTTAGACTATGTTTTTGACAGGGCTTACT  
TATTGTTTTCATTCCAGAAATCTTGAACCATGTGATTAACTGGTTTTTAGGCGATCACTTGTTTTTTTTTGTTTAAACATGCTT  
GTGTTAATCATAATTTGGTGTTCATTCAAGAAAGCTATTTCATGATGTGATATGCTCTCTTTGAGGCAAGAAGGGTTGTGCTTT  
AGCCCTGTCTCGCATTTGTCTCCTCTTTTTTGTCTGTCAATGATGCTTTCGACTTTAGATGCTGGCCCTACCATTTCAACTATT  
TTGGCCCTCAAATTTCAATGCTTTCTTACCGCAACTTCAAGCCATCTTTGGATGTAGAACCCTTGTGCTTGTGTTGACTAG  
CTATGGTTTTTTTATTCCCATGATTAAACATTGCTTCGAGGTAAGAAAGAAAGAAATCTCTTTAGTAGTTTAGTGAATGGGAAGTG  
TCGGTAAAGTGATTCTCTCCTAGACTGTGAGGGCCCTCTAAAAGCATGATCGAGCAGACTTTCACAGTTTATAGTTCACACTG  
AGTAATTTTCGTGCTATCACCCTTTCCCACTTATTTTATCTTTATTGAAAAGCATTTTGATCTAGTTTGAACAGATAGCT  
TCTATAATCTTAGATGACATTGCTTTTGAAGCAACCTTGGTATTTTATGAGTCTGAGCCTCTTGGGGGTAAGTGTCTCCT  
CGCTGTGGCTTCCATAGCTCAGTCACAGGCACATGCTTCACTGCTTGTGCATACTCAAATCGCACTGTGCTTTCTTCTGGGCT  
CAGCAACATATTTTCTTCAAGATCATGATGAGTTAAATACTGATACTAAGTTGTACTTTTCAGTTTCGAAATTTAGCACTAA  
CCTTTTCGTTTTCATTTGCGAGCTGCTTGATTATTTCTCAGTCTTAACTGATGATGCTGGTGCTCGTTTAACTCACTGATTCA  
GAGATATATCAACTATGGGTATCTGAATCATGGAAGGTCTCTCCCTCTACTTCTCTGTCTACATCTTTTGTGGCCACTACTTCC  
GTTTGCTACGGCAGATATAGCCTCCGAGAAGCAAGCACTCCTTGCTTTTGCTCTGCAGTCTACCGTGGCAACAAGCTGAAT  
TGGAGTCAAATATCCCCTGTGCTCTTGGCATGGTGTGACATGCTCACCAGATCGATCGCGTATATCGGCCCTTAGG

>SsLRR-RLK49

AGATGAGCTCCGCAACGGCCAGCCCGTCCATGGCGGCCGTCCCCGCACGTGCGCGCGGCTCGCCCGCGGCCGGGAGAGAG  
CAGGGGATGGCGTCGGAGAGCAGGGGACAAGGAGGAGGCCACGCCGTCGGAGGGAGCAGATGAGCTCCGCGGCAGCCG  
GCCCGTCCATGGCGGTCGTCCCCACGCCCGCACCCGCCGAGGGAGGGAGTGAGGTAAAAAAGGAAAAAATCTGAG  
GTGTGGGTCTCACCTTGGTATAGAGGATGAGATAGATTATGGATGGTACGGGAGAAATGGGTATAGAGGAGAAAGTCTTGAT  
GACTAGGATGTATAGAGGATGAATATAGAGGACCATGAGTGCAGACAGCCTAAGTAGCTGGGCACCTGCGGAAGACTGCGT  
CATTTTGTGCTACACTGCAAGATATGCAAAGCAGCAAAAGGGCTTGTTTAGTTGGTGAAAATGTTTGGGTTTGGTTACTGTAGC  
ATTTTGTTTTATTGTGACAAATTTGTGTCTAATCATGGACTAATTAGACTCAAAAAGATTGTCTCGTGATTCAACTAAACCTGTG  
TAATTAGTTTTTTCTTTCGTCTACGTATAGTACTCCATGCATGTACCGTAAGATTGATTGATAGGTAAGTGTAGCATTTTTGGG  
GTTACTTTTTAGGAACTAAACAGGCTCAAACAAATTGAAGTAGAACTGTAGTCAGCACAGTTTGTCACTTTGGGTGGGCGA  
ATCATTTTGCCAGAATGGGTCCAGGAACGAGACGTGTCAACATCCCATGGTCCATTCTACCAATTTTCATCAACAAAGAACA  
GCGGCAAAACGTGTGACGAATACGAGGGTGGTGGCTGATGATCAACAGCCATGACCCATGATCCATCATTAAAGCCCTAGCCGTG  
TTACGAAATCGTTCAGAAATCCACTGGTAAAGTGAGCGGCTCTCGCCTACCGGGCACCGGCCGACCATCGACCTCTTCTTGGT  
TGCTTATCGGGAACGAAAGCTTGGTACGTGGATGCGACACGCTAGTGATCCAATGCGGTTTTTGGGCCAGGCAACGGCGCAG  
GGCCATGTTCAACACGGGAACGCAATTTACGCGAAGGAAGCATGGAATTCCTTTTTTTTCGTCGAATCAATGAAGCTGTG  
AACCAGTAATGTACCACTAAATTTTCGAGGACTGGATAAACGGAAAGCAATATTTATTTCTGGTCATAACCGGTAGTTTCTC  
CGAATGGAGTTTATTGTGGCCATTATGTAAATCTAGCTGTTTGAATCAACCCGCAAGTTTTTTTTTAAAAAATGAAGAGC  
GCTACCATAGCAGTAGGGAACACAGCCAGACCTGCCAGAACAAATCCGTCTGCTCAGCCCGCCCGGTGGTGGGCCAGCTGT  
GAGCCAGCAGCGGAAACACACGCGATTGTTGGTTTTGTTTCCAGAACAGGTCTCGGCCGCGAGGTCAGGATCCACG  
ACCAGCACGGCACCGTTCCCAAGGCAAGTCTCTGAAGTCTGAACCCAACCAACCCACCGGCACCGCGCAGGTGCGCCAG  
CGCGCACGCATCCCGCAGGCCGACGCGCTACGCACACTCCCGTCCCGTCCATCGGATCCCCCTCCCCCTTCACTCTGTAGG  
AGAGGAAACCCCATTCGATTCCCATCAGGTCTCGTAGTGTGCTGCCACTGTTTGTGCTCTCTTCCGCTGCTCCTCGC  
CCGGCCCCGTGGGCCCAACACCCAGCGCGCAAACTCCCAAGTCCCAACCCCGGATAAATTCGCCCCGCAATTA  
CCCAGCTCCCCGAGGCCCATTCGCGCAACCGCACGGGAGTGTTTAGGGTTTTTCTCCCCCGCACGCCACAGACGCCAC  
ACAACAACACAGCAGACGGGCCGCTCCCCCACAAATCCCCAGAAACGGACGCCACCCCTCCCCGCTTGCCTCGCTC

>SsLRR-RLK15

>SsLRR-RLK63

>SsLRR-RLK341

>SsLRR-RLK310

35LKK-KLK510



TCAAGTATCGTAAGACACGAAGTAAATGGCCAAAATGAACGTGAGGGAACGGTAATAATGGGATAAGCTGCCGCGCCTAAC  
TGTTACAGGGGACAAAATACGCTACCTGTTTGGTTGAGTGCTTTCCACCGCGAGTTCGATGCCATACGGGTGAGGTGGCGCG  
AGAGGGGTGGCGCTGGGACGCGCATGGCCGCATGCAATTGAGAGCTGCGGCGCTCTCTATTTTATTTCGCGAGTCCCT  
CCGCAACCACGAAGGAGATTGGAATCGGTTAGCGCCGGAAGAAAATTGTATGCATACCGTATGCACCTAGGAACAGTACATA  
CAGACGTGAGAGCCAATCATAGGACGAGAACATGGAGTGGAGCACGTGAGAGCCGAGCCAGTCACAGGATGAGGACGGCT  
TCCAACTGCCACCCGATGAGCGCATACCGTAGATGCTGTTGCTTTGTCCACGTGGCAGCAGATTGACACATGTATGCACCGAT  
CATGGATGCATAAGGTATGCATATAATTTTGGCGTTAGCGCCTGGGGAGGGAGGGCAACGGTCTCTGTAGTGGCGCTG  
GATCCATTTCCAGGGTGACCTAATACGGACCGAAGCATCCATCCATACACGAAATAACGTAATCTCTTGACGCTGTGACTTGT  
TGACGGGGCGAAAACGCCGAACCAACAGCACGTTAGTACAACCTACTATATTTAGAACATAGAGAATGGGTGGTGTGAC  
TTCAACCGTAAATGTTTCTTTTTCAGTGTTGAATTCATATAGGTGCGGTGTGCTTTTGCATGTTTATATGGGTGAGAGCGC  
ACTGTTGTCAATACGAGGACCTAGTGTGTTTCTCTTTGATTTTTTAAGAAAAAACATGGAGAGCAGAGCATGTAGGCATGTA  
CTACCTCCGTCCACGAAAGAATGTAATTATGGAAGTGTGCTGGTCAAATTAGCTTAAGTTAACTAAGTCTATAATAAATAG  
TATTAGCATTTATGTCTCCAAATAAACTTATTATAAAAAAACATTCTATAACTCATCTAATGATACTTATTGTGTCTCATGAGTGT  
TATTATTTTTTATATAATTTTAGTCAAAGTTTAAACCAATTTGATTCCTCAAATGTGAGAATTGTATTCCTTTTGTGGACTGAGGA  
GAGTAGCTGGAATGCTGGAATACAAACGAAGGAATGCAGGACGTCTACGGTCTCTCGGAGGAGAACGCGAGGCGTTTC  
CGGGGCGACGCGTTTCGTGCGGGCGCGCCGGCCCGTCCCATCCAAACGCCAAGCCTCAGTTCTTTACCTCATGTGCTGCGG  
TTCAACCTGTGCTCCCTCGACCAATCCGCTGAGTGTGCTGAGTTCAGCCGAGCCGATGCCGATTAACTAATCTCAACCAATAC  
CTTTAACCACTTGTGTCTTTGGCTAATTAGCTGGAGTGTCAACCTACATCCAGAGACCAGCAGAGTTGCCAATTCTGGCA  
GCACCACAGCATACTAATATAATCTGCCGTCCATGGCGATCTAGCTTAATTAGCAGCAGCTGCGAGCTTGTCTATGGCTAAAGT  
GTTAACTAGTCGAGTTAATTACGAGTGTAAAGCAGAACTGTGCTGCATATTTGCCTCGGCGCAGCTGGACGGACGAGCTCA  
CCACCAGCTTCACTTACACACAGTATTAGAGATAAAGCCAAACGAGGAGAAGAACGTACGATGCGAACCAGGATTACGATATA  
AAAAGATCCTGTCTTTCCCGCATGTTTACACACCTCCGACCCAACCGCGTCCGCGCCACCGATTCTCCGCGCGCGCTGAT  
GAACTCTAGGCTGCGGCCTCCAAACCTCCATCCCTTCTATTGACACACGCGGCGACGATTTCTCGCCCGCGCTGCGCGTCCG  
CGTCCCTTGTGTGCGCGCGCCAGCCGGCTGCTTTATTAGTTACTACTTCCAACCTGCCTTTCTTGATTACCTGGAAGCTGCCG  
ACCTCGCAGCGCGCGCGGGCGA

>SsLRR-RLK324

CGGCCGTGCCGCGTGCCGTGTGCGCACGGCACGGTGCCCATATATAGCAAGACACGAACGGTAATAATGGGATAAGCTGCC  
GGCGCTAACTGTTACAGGGGACAAAATACGCTACTTGTGTTGTTGACTTGAGTGCTTTCCACCGCGAGTTCGATGCCATACG  
GGTGAGGTGGCGCGAGAGGGGTGGCCTGGGCAGCGCGCATGGCCGCATGCATTGAGAGCTGCGGCGCTCTCTATTTTTAT  
TTTCGCGAGTCCCCTCCGCGGCCACGAAGGAGATTGGAATCGGTTAGCGCCGGAAGAAAATTGTATGCATACCGTATGCACC  
TAGGAACAGTACATACAGCACTGAGAGCCAATCATAGGACGAGAACATGGAGTGGAGCACGTGAGAGCCGACCAATAC  
AGGATGAGGACGGCTTCCAACTGCCACCCGATGAGCGCATACCGTAGATGCTGTTGCTTTGTCCACGTGGCAGCAGATTGAC  
ACACATGTATGCACCGATCCTGGATGCATACCGTATGCATATAATTTTGGCGTTAGCGCCTGGGGAGGGAGGGCAACGGTC  
CTGTAGTGCCTGGATCCATTTCCAGGGTGACCTATTATGGACCGAAGCATCCATCCATACACGAAATAACGTAATCTCTTGA  
CGCTGTGACTTGTGTGACGGGCGAAAACGCGCAAAACCAACAGCAGCTTGTAGTACAGCTCACTATTTTGAAGCAATAGGAATG  
GTGGTGTGACTTCAACGGTAAATGTTTCTTTTTCGGTGTTGCAATCCCGGGTGTGCTTTTGCATGTTTATATGGGTGAGAG  
CGCATCTGTTGTCAATACGAGGACCTAGTGTGTTTTCTCTTTATTTTAAAGAAAAAACATGGAGAGCAGAGCATGTAGGCA  
GCTACTCTCCGTCCGCAAAAAGAATGTAATTATAGAAAGCTGCTAGTCAAATTAGCTTAAATTTGACTAATGTAATTAAT  
AGTATTAGCATTTATGTCTCCAAATAAACTTATTATAAAAAAACATTCTATAACTCATCTAATGATACTTATTGTATCTCATGAGT  
GTTATTATTTTTTCATATAATTTTAGTCAAAGTTTAAACCGTTTGATTTCTCAAATGTGAGAATTGTATTCTTTTGTGGACTGA  
GGGAGTAGCTGGAATGCTGGAATACAAACAAAGGAATGCAGGACGTCTACGGTCTCTCTGGAGGAGAACGCGAGGGCGTT  
TCCGGGGCGACGCGTTCGTGCGGGCGCGCCGGCCGCTCCCATCCAAACGCCAAGCCTCAGTTCTTTCACCTCATGTGCTCA  
GTTCAACCATCTGTCCCTCGACCAATCCCTCTCTGAGTCCGATTGACGCCGAGCCCGATGCCGATTAACTAATCTCCAATTAA  
CCTTTAACCACTTGTGCTTTGGCAAATTAGCTGGAGTGTACCACTACATCCAGAGACCAGCAGAGTTGCCAATTCTGGC  
AGCAACAGCATACTATAATCTGCGCTCCATGGCGATCTAGCTTAATTAGCAGCAGCTGTAGCTTTGTCTATGGCTAAAG  
TGTTAAACTAGTCGAGTTAATTACGAGTGTAAAGCAGAACTGTGCTGCATATTTGCCTCGGCGCAGCTGGACGGACGAGCTC  
ACCACAAGCTTCACTTACACACGATTTAGAGATAAAGCCAAACGAGAGAAGAACGTACGATGCGAACCAGGATTACGTA  
TAAAAAGATCCTGTCTTTCCCGCATGTTTACACACCTCCGACCCAACCGCGTCCGCGCCACCGATTCTCCGCGCGCGCTG  
ATGAACCTTAGGCTGCGGCTCCAAACCTCCATCCCTCTATTGACACACGCGGCGACGATTTCTCGCCCGCGCTGCGCGT  
GCCGTCCCTTGTGTGCGCGCGCCAGCCGGCTGCTTTATTAGTTACTACTTCCAACCTGCCTTTCTTGATTACCTGGAAGCTGC  
CGACCTCGCAGCGCGCGCGGGCG

>SsLRR-RLK88

CATGAATTAGTCTTTGTTTATGTAATTAGTTTTATAATTAATCTATATTTAACTCCTAATTAGTATCAAAACATCCGATGTAACAG  
GGACTAAAGCTTAGTCGTAGCAATCAAACACTAGAACATCCTCACTGTTATTTTGATAGAATAGGAGTAGATAAAAAACAG  
CTATTTGATACAGTGCATTTGAGAAGCCAGAGCTGAAGTCGTCTTAAGCTTTACTAAATGGGCCATAAACGCACACATCACATA  
GTTACTGTCTGTTCTTACTTACAACCTCAAATCTCAAATGCAATTTCAAAGTGACAGACACGGTCACTAGGGACACTCACGTA  
GACACAGTTTAAATAATCCAGAATCTCGTATTCTCATGAAACAAAATCAGAAAGGTAGCAAGGCGGTAAAAAAACAGG  
AAATGTGAAAAATGGCTTAAACACATTTCTTGTCCCACTTTACGTTTTTTCACCATGTTTCAATTTTCTGTAaaaaaAGTACG  
AAAATTAGAAAATGAGACGAGACGGGAAAGCCATTTCTCTATCTACGTAGAACATCCGAGGGCTTAAACTGGGATGTACAT  
AGATGGTTCGAGAATGCCAAAGCGGGCGGTACATTCGTGTTGTTGGCACAAACAGAATGTTTTTGATTGGATATTACGTTTCAC  
AGTTTGGGTGCGCCCAATCTGTGTGACTCGATCGGTGTACGTTCCGGCGCGAGGAGCCTTTGGGCTTGCACGCTGTTCCTC  
ATTCCGATCCGAGTCAATAACTATCACAGACCGTTGACGACGATTACGGGGTATAGAGAGCAGTAGACGCAGCCAAAGGC  
AGCTACGGGTACGGTCTTTGGGTTCTGTACGAGTACGACGCATCACTCGGAGTCTGTCTGTACCGTTCTCTCGCTGTGC  
CCGACTGGAGAGAAGGAAGCGCCCAAGAAAGAAACGGCCTGGCCAGGCGCGCGCTGCCGAGGGAGACCGGTTCAACG  
GAGCGACACACGTACGCCTCCCCTCCCTCGCGTCCATATACCGCTCTTGATCGACTCGCCGCGGCGGCTTCACTACCAG  
TCTACCACCACGCAATCAGTCGAGGCCCTCCGATCCGACGCGTCTCTTAGGTGCGCGCGCCCGCGGTGCATCCAACCG  
AACCATGTGTATGCCGTGTGCGGCTGCCGCTACAGTTACGGCGCCGCTGCCGCTGTAGCTGTAGAGCATCCCGTGTGCG  
CCCTACCCAAGCACGCGGCGCTGTCTGTGATCCGCGCCATGTCCATGTGGGCATGTGGCTGACGAAAACGTGATTTGC  
CCCTGCCGCTGAGTCTCGCCGGCCACGTCCGCACACGTCGCGTCCATCGTATATACTAGATAGATAGAGTACGGAGTAGAAT  
ACAATAATACTATATAGGAAGCATAGCCGAGTACCAAGCAGCAATTGGTAGTAAACGAAAGCAAGGAGCGGTGAGG  
ATGGAGGGTTTATTAGTCACAGCAGACGCTGTATCCTTTTTGTTTTTCTCCATCTCTTCGTGCAGCAGACGCGCTCTCCGGCT  
CCTCAAAGACGTCCAAATGGAAAGCGCCCGGCGGTGGCCGTGGCCGTGTTCCCGCCACCAGTAGCTTGCCTGCGACTG  
CGAGCTGCAGCCACCATCTATCTATCCATCTCCTTCCATCGAGCTGTAAACATCAGCGTCTGAAAAGAAAATTGTAATCAACG  
CGGACGCCATCGGTATCGTCTGCTCCTTCTGTCGAAAGCCCGCGCTAGCTTCCGCCACCGTCCGCTGCTACCC  
ACCGTGCGGGCAATCCGGGCGGAGCTATATCAGGTCCCTGGACCACTGCGACTCCTTCTTGCCTTAAACGAATTCGCTGT  
CGCCGCACTGCTCCTGCGCAGACGAGACGACGTACGTACGACGCGTGTATCGTAGCGCGTGCCTTGCACCGATCGAT  
CACTATCCACTCGCGTGCCGGCAAA

>SsLRR-RLK131

CGTAGACACAGTTAATAATCCAGAATCTCGTATTCTATCTCATGAAACAAAATCAGAAAGGTAGCAAGGCGGTAAAAAAC  
AGGAAATGTGAAAAATGGCTTAAACACTATTTCTGTCCCACTTTACGTTTTTTCACCATGTTTCAATTTTCTGTAAAAAAG

TACGAAAAATTAGAAAAATGAGACGAGACGGGAAAGCCATTTCTCTATCTACGTAGAACATCCGAGGGCTTAAAACTGGGATGT  
ACATAGATGGTCGAGAAATGCCAAGCGGGCCGTACATTTCTGTTGTTTGGCACAACAGAATGTTTTGATTGGATATTCAGCT  
TCACAGTTTTGGGTTCGGCCCAATCTGTGTGCGACTCGATCCGTTGATCAGTTTCCGGCGCGAGGAGCCGCTTTGGGCTTGGCAGCT  
GTTCCGTTGTTCTCTATTCCGATCCAGACCGTTGACGACGATTACGGGGTATAGAGAGCAGTAGACGCAGCCAAGGCAGCTA  
CGGGCTACGGTCTTTGGGTTCTGTACAACGCATCACTCGGGGAGTCTGTCTGTACCGGTTCTCTCGCTGTGCGCCGACTGAAGA  
GAAGGAAGCGCCCAAGAAAGAAACGGCCTGGCCCGGCCCGCGCTGCCGAGGGAGACCGGTTCAACGGCAGGCTGCGG  
AAACGGAACGAACGAGTGGCCGCTCTGTGCTCAGAGCCAGTCCGTCGGCGTAGCTGTGCACCCACGAAAGATCGCACAG  
CGACACACGTACGCCTCCCTCCCTCGCCGTCCATATCACCGCTCTTGATCGACTCGCCGCCGGCCGTTTCTACTACCACTCTA  
CCACCACGCGATCAGTCGAGGCCCCCTCCGATCCGACGCGTCTCTTAGGTCGCGCCGCCAGCGGTGCATCCAACCAGAAC  
CAGTGTGTATGCCGTGTGCGGCCTGCCGTACAGTTACGCCGCGCTGCCGCTGTAGCTGTAGAGCATCCCGTGTGCCCC  
CACAGCCCCAGCGGTATCAGTTGCGACGACCGTCGACCGGCGTATCGTCTGAAATGTAAGTATTCCCGCGCGCCACTAC  
CCAAGCACGCGCGCCCTGTCTTGCTGATCCCGGCCATGTCCATGTGGGCTATGTGCTGACGAAAACGTGATTTGCACCTGC  
CGCTGAATCTCGCCGGCCACGTCCTCACACGTCCGGTCCATCGTACATACTACTAGATAGATACTACGGAGTAGAATACA  
ATAATATACTATATGGAAGCATAGCCGAGTATCAAGCACGCAATTGGTAGTAAACGGAACGAGAAAGCGGGTAGGGATGG  
AGGGTTTATTAGTACAGCAGACGCTGTATCCTTTTGTGTTTTCTCCATCTCTTCGTGACGACAGCGCGTCTCCGGCTCCTC  
AAAGACGTCCAAATGGAAGCGCCCCGGCGTGGCCGTGTTCCCGCCACCAGCTAGCTTGCGCTGCGTCTGCGAGCTGCAG  
CCACCTATCTATCTCCATCTCCTTCCATCGAGCTGTAACACATCAGCGTCTGAAAGAAAATGTAATCAACGCGCAGCCAT  
CGCGTATCGTCTCGTCTCCTTCTGCAAAGCCCCGGCGCTAGCTTCCACCAGCGCCACGTTTCTGTACCACCGTGCAGG  
CAATCTCGCGGAGCTATATCAGGTCCCTGGACCACTGCGACTTCTTCTTCGCTTAAACGAATTCGCCCCGTGCGCGCACTGCT  
CCTGCGCAGACGAGACGACGTACGTACGACGCGGTTGTATCGTAGCGCGCTGCCCTTGACCCGATCGATCACTATCCACT  
CCCGGTGCGCGCAAAATGCGGTGGCGCCCGCGCAGCGCCGCGCGGCGGTCTACGTCCTCTCGTCGACGCGCTGTGGT  
GCGCCTCGCTACCCCGCGCGCGCGCGCGGACCTCGCGCGCGGACCGGCGCGCTGCTCGCGTTCCGGGCGCGGCTG  
GGGCGCGGCTCCCGTGGGACGCGCGCTGCGCGTG

>SsLRR-RLK160

CTGATTTAGGTCTGGTTTAGTTCTCAAAAAATTTTGGTCCATCATATCAAATGTTTGGACATATGCATTGAATACTAAATGTAG  
ACGAAAAAACTAATTGCACAGTTTGGTTGGAATCGTGAGACGAATCTTTAAGCCTAATTAGGCCAGTATTAGTCTTAAG  
TGTCACAGTAACCTACATGTGCTAATGACGGATTAATTAGGCTTAATAAATTTGTCTCGTAGTTTCTAGGCGAGCTATATAATTA  
GTTTTTATTAGTATCCGAAAATCTCTTTCGATATCCCATAAACATTTCAATATGACACCTAAAAATTTTCTTTTCACAAAACATAA  
CACAGCCTTAGTAGAAGACCTGACAGCAAAACACTTTCCAAATGAAATGTGGAGCCCAGACATACGGAGAAAAAGGCCG  
CATGAGAACAGAACTCGATTGTTTTCATACTGGAGGCAGAGACAATGCAGCCGTGCTTGACAGGAGCAGGATAGCTACGG  
CCGTGCTGTGCTGTGCTTTTGTGTTTTCCGGCCAGACTAGACTCGCGCGGTGGGTACTTTAGAATGATCACTTAAAGCT  
TTAAATATAAATATAGAGTAAAACTGTTATATTGGGTACTCTAAACGATATTCTATCCTTTCTCTTACTCTATTTAGAGTGG  
TACTGTACAACTATATATCTATAGTGACGGCCCCACTAGCTAAACAAAGGAAAAAATGATATAACTCACAAACCAGAAATC  
TAAATTAATTTTCGATTTTACCATTAAATTCGTCTCAATAAATCCTTCAAACTAGATCACACATGAATATATTAGATAAAGTG  
ACAAGTGGAATCCCACTGAGTAAAGTGATAGAGGATGAATAGAGGATGGACGGGTGCGGAAGAATTGAGTATAGAGGAG  
AGAATCTTGCTGACTAGCACATATAGAGGATGAATATAGAGGTCCATGAGTGCGAGTAGTCTGATGACGCTCAGATACATAAG  
AAATCATAAGACTACCCGCACTCATGGACCTCTATATTCATCTCTATACGTTCTAGTCAGCAAGATTCTCTCTCTATACTCAA  
TTCTCCCGACCCCATCTATATCATCTCTATCTCACTCTCACTGTCGGGACCCACTTGTCACTTTTCTAATAATATC  
CATGTGTGATCTAGTTTTGAAAGATTATTAAGACGAAATTAATGGTGCAATCGAAATTTAATTTAGATTTTTGTTTGTGAGT  
TATAGCATTTTTTTTCATTTGTTTAGCTAGTGGGGCCCCGCCACTATAGAGTATAGAGTAAACACCCGTACCCTCTAAATATAGA  
GTGAGAGAAAAAGATAGAGTATCATTTTAGAGTACTTAGTGACGAGTTTTTACTCTATATTCATACTCTAAAGCTTTAGAGTTT  
CGTTTTAGAGTACCCACTGCGGGCAGTCTAATACGCGATACTGTATACACCACTGATTTCAGTCCAGTGATCGACTCAGCGAC  
AAGTGATGAGCATTCAACGGCAGATCAGACACTAGTTTTTCCGGTTGAATCCTGAACGCAAAGCACCATTTGCTGGTTTTTCAT  
GTGAGCTTTCAGCAGAACGAATACGATGCGCCAGTGTGAGTGTCTGACTTTCTGAGTGAGCAAGAAGCCTCATATAAACGA  
CGGCTGGGAGGGAGAGTTTCATGGGATGCAAGTGCAGTGCCTGCAATGTGCGCTCGGCTTTACTCCGCGTGGCTCCAACGGTG  
CACAAATGGGCTCACGCCGTGCGACTCGTTCCGGCGGAGGCGCCACGCCCCGCGCGGCGCGCCCTCTCCCGCACACG  
CCATTAATCCCTCACGCACCGGGCCGTTGCACCATCAACTCCCTCCCTCCGCGCCATTACTGCTACATACACGGATACACCT  
ACGTGCCCTCGCGCGAGGCCGTCCCGCGGCCACGCTACCTGCACTCGCCGCTCGCTTGCTCGGGCTCGAGCAT  
TGCAATGGC

>SsLRR-RLK190

TGTTCCCTAAATATTGGTGAATTGTAGAACTTTCTCCTCATGTAAACACTAACATGCAACTTGGTAGATCTGGTTTGCATTAG  
TGGAACCTGAAACTAATTTAGAACTAACACATGATCTTTTGGCAGCTGAAATCTGCTCTGTTACTACGTTGAGGATTC  
AGCGCAGTTTCTGAGAAATATGTCGCCAGGTATTCTACTATTCTAGCCTAAACTTCTCAGAATTGCAGCAGCTTCTCCCATC  
CTGATTAATAAGATTTTCTCTACTATCTCATGCAAGTGTAACTTATGGGCGAGTCATGCCGTTCCTAGAGCTTTTTGCGC  
GCATTGATGCTGTTGACTGTGCTACAGTAATGGAACCTGCCAAGGAGTACATAATTGATAAGGTAAATCTCCAAAAGTGGTG  
GCTAATCTCTIATGAGAGTACTACAAATATCTTTGGTGAACGGGTGTGTAGTATAGTGGTCAAGGAGCTTTAGTAGCTAATT  
AGTCCTGGGTTGCACTGTCCGTGAGAGCGAATAACAGACCTAGGTTAAAAAAACACCCCTTGTCCGCGAGTCTCCCTGAGTC  
TAGGGCAGCTGGCCTTGGGGGTGTTTCTTGCCCTGTGTACGAGAACTTAATGCAATGTTTCCCGCAGGAGTTTAAATACA  
GTATCTTTGAATACTTAGTTACTGGAGGCCTCATACACTGACATGATTGGTTTGGCAATTTACAGGATGTTGCTCTGGCTGGA  
GTGGGACAGCTCACGAATTTGCCAGAGCTTAGTTGGTTTCGCTCGGAAACATGTTCTGATGATGATTTTACTCGAAGGATATT  
CTTTGGGAATGCAAAATAGTTGAAGCTGTGGCTCTGTTATAGTGTGTTGTAACCTTAGGCCATTCAITCCAAGAAATTGGTA  
CCATTTATATATATCCGACTAAATGATATTGTGGGAGAAATTACATTTGCATCGAACACTATTTATCTTTAGGAATACATGGAT  
ATATTGAAACAATAGCAGATCTATAATTTTGATAATTCATGAATGAAATTGTGCTTAAATATAAATTTTCTTTTTGAATAGAA  
CAAATTGAGTTGAAATAAAAAGGTAAAATGCATTTTGATATTTTATGGATGAAATTGAGCCTATATTGCAAGTTTGAGGATTGA  
GACGATCATCTTCACAGTTGTTGGATGAAATTGAGTCTAAATTAAGTTTGAGGAGTAAACAATCATTTTCATAGTTATAG  
GATGAAATTGAGTATAAAAGTAGAGTTTGAGGACTAAAACGGTCAATTTAAAGTTTCAGGGACGAAGCTGAGCTTCGAGTA  
ATAGTTGAGAGATTAAAAATGGCTATCTGCTTGAGGCGAGAGACAATGCAGCCGTGCAGGAGCAATGATAGCTACGGCCGT  
GTCGTGTGCTTTGTTTTCCGGCCAGATTGATGACGCTCAGATACACAAGAAACCATAATACGGCATACTGCATACACCAGT  
GATTCAGTCCAGTGATCGACTCAGCGACAAGTGATGAGCATTCAACGGCAGATCAGACACTAGTTTTTCCGGTTGAATCCTG  
AACGCAAAAGCACCATTTGCTGTTTTCATGTGAGCTTCAGCAGAACGAATACGATGCGCCAGTGTGAGTGTCTGACTTTCTG  
AGTGAGCAAGAAGCCTCGTATAAACGACGGCTGGGAGGGAGAGTTCATGGGATGTAGACTGCGCTGCCAATGTCGCGTCGG  
CCTTACTCCGCGTGGCTCCAACGGTGACAAATGGGCTCACGCCGGTTCGCACTCGTTCCGGCGGAGGCGCCACGCCCCG  
GCGCGCGCGCCCTCTCCCGCACACGCCCATTAATCCCTCACGCACCGGGCCGTTGCACCATCAACTCCCTCCCTCCGCGC  
CATTACTGCTACATACTACGTGCCCTGCGCCGAGGCCGAGCGCTCCCGCGCCACGCTACCTGCACTGCGCGCTCGCTTG  
CCTCGGGCTCGAGCA

>SsLRR-RLK52

GCGCCATTAGCCTGTGCCTTTGCCGTAATCATTTGTGCGCTCAGGGTCATGGCAGCAGCGGCTGTCCCGGCCGACTGCGT  
CCACTAGCTCACGGCGCCATGATTTGCATTTGTTCCAGTCCACCCTGATCCAGCACTACCAGCGGCTTGTTCGTTTGCACG  
AGGTTACTATCTCGTAGTAGTGCTAGCACAGAGCAAGAACTACGGCCACAGTTTTTCTGAAATCCTAATGTTGTGCTCATGGA  
AAAAGGGCCGGCAGCCGGCTACGGCCAACATCCTGAGCCCTACGATCACCGATGCCCTCCGGGCTCCGGAGCTCACCAC

TTATCTCTGGTTCGGGCAAGAGAAGGCCCTACGTCCAGCGGGGGAGGGAGAGATTGTATTTCCTTGCACCGAGGTGCTTGT  
GTAGGGGTTACAAGCTTCGCAGAGGGGATAGCGACCGAGGTCTCAAAAAGAGAAAAAGAAAGTACAAGATGATTGCTT  
GAGATGTTGATCTGCATCTTGTACCGCGGCTGTTGTCCGTGCTCTCTGTTGTCTGTGTAGCGTCAGAGCTCGGCTCGAG  
GCCGGGTCGAGGCCGATTGGATAAGTCTGAATCCCTTGGATCGCGGTGTACGGGCCTTGTGCGCATCCTCCCTCGAGGGTAAC  
TAGTGATGATAGTATGTCGCCGAAGGTGGGTACAGTACGCTTTTTCACCTCCCATCAGCGGATGGCGGCTAAAACAGTAGGGA  
CTGACACTGGTATTGTCCCGAGCTGCACCCCTGGTGTGCCGCATTGCCGGTAGGTGGTAGTGGTATTGCATTAATGCTATGA

CTCTACATTATTACACGACCTGACATGCACTCTTCTCGCCATTCTTCTGCTCACCATCTTAAATACACCTAAGAAAAATG  
TACTCAGCCCTTGTTTAGTTTCCAGAATTGGCCCTAAAAATTCCACTATGCAAAAAAAGAAATTTCCATCATATCAAAATACCG  
GCACATGTATGCAGTATTAATAGTAGATGAAATCAAAAACTAATTGCACAGTTTGTGTGACTTTGCGAGACGACGTTTGA  
GCCTAACTAGTCAATGTTTGATAATTTTACCAAATGCAAAAGAAATGTTCACCTACACAGTCTGTAGAGTAAATTTTG  
GCATCGCCAACTTTGGGCAACTAAACATGGCCTTAGAAAAGGGCAAAATTACGTGGAGCAAATTGGGTGGTGTACGTACGT  
ATTTGATGAGAAACCTTGTTGTTTGACCTGTGAATTTCAAGTTTCGCGGAGGGATAAATATGTCTCCCGTGAATCTGCATCTAC  
CTGGTAGACAAATCTTCGGTGGCTGGAGCTCGGACATGTCTCTGAATCTAAGGTCCTCAATGTCTCTGAAACGAGGCTCTA  
TCCGTGAGTTGCTGAAATTAATCCCACTAAGCAAACTTCCATTGTTTATCAGTCAACACGTCCTCATCACCAAATATG

TAAACAACCCAGCTACCGCGGAGACCGAAGACGGCTCGGGTACCTTCTTCGGGCGCACCCGATGCGACGAGGTGAGCG  
TGC CGCGCTGTTCGCCTGTGGTTGTGGGGCGCGCGGATTGACGCGAGAGTTGACGCGCATTTGAGCCTCGCTTTTGGG  
TCCGCGAGGGAAGCCCGACACGGTGGGGCTTTTGGCTTTTGCGGGTGCGCTGCTGCCATGCCACCCACGGTAAAAAC  
TCGCGGGAATACCCCTCTCCGTTCGCACCTTCGCGCCTCCACCTTGCCAAGTCTGCGCTGCAATTCGCGTCCCCGGT  
CCGCGGGCGTACCGTGCCTCGTATCCAGTGTTCTCTCCGAGACCCGACACGTAACAAATACGTCGGGCACGACTACCGTCC  
ACCTCTGCTCTTTACATGTACTGTGCTCCCTCCCTCTTAAAGAAAAAGTCACTTTAAAAACCGTATGATCAACT  
TTCTCAACTTTGACACAGACTTATAGAAAATATGTGAACATTTATATCTTAACTAAGTTTAGCAAGAGAGGTATACGTGCGTG  
CTTACGTAGGTACAAGCGTGTCTGCGCATCTTTGTGCACTGCTATTACGCTCAGTGTCAAAATCTCAAGCCCAAGACCGTT  
CATCTTCGGCTTTGACCACAGCTCCACAAATCCCTACCGTATAACTACTGACTGAATACAGTCTACACACCCACACTCT  
GTAGTTCTGACACACATCTCTCAGTCGCAAAAATACAGCTTCTCCAGAGGACCACATGGCAAAAAAGGATAATAAAAAA

>SsLRR-RLK138

>SsLRR-RLK139

>SsLRR-RLK1

AAAAGAAACAATTTGGTGGCCCGTCGTAGCGCACCCCCGTCCCGCTCCCGCCTTGAAGCTAGCCCCGTGGCCGCACAGGCTG  
CAGCACAAACACAACGGTTCGTTTCTCAGCTCAGCAACCCGCTCCCGTCGCTACCCACCGCAACCGGCGTGACACAGTA  
CAGGTACCGTGACCAAGGACGACACGGACCGCTGCACGCTGAGCTGCGCGTGAGTGACGTAGTCTGTAATCATGAGGCGCGAC  
ACGCGCCTCCGTAGCCTGTACGAGGACGTAGTTGTACATGCGCGGCCTTGAATGGAGTCCATTCGCTGGCCCGTAGACGCAC  
GTAACGGGCAACTCGCCGTGCCGGATCCCGGCTGCCAATGCCATGCATTCCTCAACCGCAGAAACAGCGTCCCGCGGCCTTG  
GGAGGCAAATTTGGCAAAATCTCTCGTCCCGCCACGCGGGACGCCATACAGCCTCCCTCCGCGGCTCCGCCTTGATCTGA  
ACTCCGATCAGCAATTCACGCCGAGCCGGGACATCCCCAACCCGGAAAGCCACGCACTACCCCTTTCCGCAACCATCATTC  
ATCTACTGCCCCCGCTGACCTGACCTCCCAAAAGCCAAAGCGTTTCGCTAGAAATTCACGTGTAGATCGCGGCAGGCGCTAC  
GGCCACCCGACCTGACCTGCCCGGGCCGCGGGCGACGACCTACGCACATCCGGTTGGTTTCGCGACAACGTCAAGGCAA  
AACGTCCACGCGGGACGCGGCCCTCGCGCCGCGGACACGAAACTAGGCCAGTGCGTAGCGGGCGGCCGCTCGCTTG  
GACGCTTCGACCCATAACGCACGCCACCCACCGGCCACCGCCACCTACTCGCTACTGCTCGGCGCGGTGGCTGCCAGTTAA  
CGGCTGCTTAACTACTGCTCTCCGCCTACTAGTAGCGGCAGCGGCCGAGCTGGTCTGTCTAATGCCGCTGCGGCTGCGTG  
CGCTGGCACAGCGCGCCTGCCCTGTGCG

>SsLRR-RLK34

ACCAGAGCCGCCACGTCTGATCCACCGCGGCCCGCGTAGGGTAGTCACCCCAACGGTGTCGCGCTTTGGCCACCATGTT  
GACGGAGGAGGAGGAGCCGCCCTTCTTCATCTCCACGCGCTGCTCGTACGCGACGAGCTGGGCGTAGAGTTACGCGATGGT  
GATAGGCTTGACGCGCGCGAGATGGAGGTGACGATGGAGTTCGAGGTTCGAGGTTCGAGGCCGGTAGAGATGCAGAGCA  
GCTCCTCGTCATCTAGCTTGGCGCCCGCCGAAGCCATCTCGTCGGCGAGACTTTTCATTTTGGTGAAGTACTCGGCCACCGT  
AGAGGACCCCTTTGACGTCGTGGCCAACGTATCCTTGTGCGATGACGCGAGCACGAGACTGCGAGGCATGCTGTCCCGC  
GATGGCAGCCCAAAGTTCGGCTGCAGTCTTGGCAGTGGACACCTGCGAAAAAATTTCTTGAAAAGTGAGGAAAAACAAGT  
AGCTTAGGATCTGTTGATCCTTGGCCACCCACTTGGCGTAATCCGGGTTGGGGACCGGATCGCCCGCCTTGCCAGCAGATC  
CGCTGCCGGTTCGCGCGTGATGAAGGGCGATGGTGCTTTTTCAGTGCCGGTGACGTAGCCCCAGACTTTAGCGCCTTTCAAG  
GTGGAAGAGACTTGGGCATACCACATCCAGTGGTTTCCCGGTGAAGCTTCTCGGTTACGACAGGGGAAGAAGCCGAAGGA  
AAACGGATTGGAAAGTTGGCCATGGATCGGTTTTTCGAGTGGAAATGGTCTCCTGATACCATGTAAAGAAAATAAGAAATAG  
GAGGTAACGGGGTGACCATGCTGGTTCCCGGTTCCGTGTTTTATATAATGAAGGGAAGAGCCCCCTTCGTGGCTGTACACAGAG  
ATCGTTTACAATGAAGACTTAATCTACAAGCTCTCTAGCCTATGTCATGTATGTCATGAATCTACAAGCTCTCTAGCCTATGCA  
TGTATAACAGGGTTGATGGCGCCTATTCAACACTCCTGAATATCGCGCCATGTGTATGCTTCTAGTACTTCTATCAAAACAAA  
CGTTTCGTTTTCTAGCAACCGCAGTCCCGTGGCTCACCACCGCAACCGGCGTGTCATGACAAACAGTACGGTGACC  
AGGACGACACGGACGCTGCACGTACGTGGCGTGAGTGACGTAGCCGTATTCATGGGCGTGGGCGACACGCGCCTCCGTAGC  
CTGTGCGAGGACGTAGTTGTACATGCGCGGCCTTGAATGGAGTCCATTCCGTGGCCCGTAGACGCACGTAAACGGGCAACTC  
GCCGTGCCGATCCCGGCTGCCAATGCCATGCATTCCTCAACCGCAGAAACAGCGTCCCGCGCCTTGGGAGGCAAAATTTGGC  
AAAATTCCTCGTCCCGCCACGCGGGCACGCCATACAGCCTCCCTCCGCCTTGATCTGAACGGAAATGCTCCGATCACGCC  
GAGCCGGGCGAGATCCCCAACCCGGAAGCCACGCACTACCCTTTCCGCAACCATCTCCATCTACTGCCCGCTGACCTG  
ACCTCCCAAAAGCCAAAGCGTTTCGCTAGAAATTCAGTGTAGATGCCCGCCGGCGCTACGGCCACCCGACCCGACCCGAC  
CTGACCTGCCCGGGCGCGGGCGACGACCAACGCACATCCGTTGGTTTCGCGACAACGTCAAGGCAAAACGCTCCACG  
CGGGCACGCGCGACACGAAACTAGGCCAGTGCGTAGCGGGCGGCCGCTCGCTTGGACGCTTGGCGTGGTACCGGACGCC  
CGCGCGCCGACCAATAACGCACGCCACCCACCGGCCGTGCCACCTACTCGCTAATGCTTACTGCTCGGCGCCGTGGCTGCC  
AGTTAACGGTGCTTAACTACTGCTCTCCGCCTACTAGTACGCGACGCGCCACCGCGGCCGAGCTGGTCTGTCTAATGC  
CGCTGCGGCTGCGTGCGTGGCACAGCGCGCCTGCCCTGTGCGG

>SsLRR-RLK156

TTACTGGATCTCAGAAAACTATTTCTGTTGGAGAATAAATGGATGTGAAGCTTTCTTGATCCTATTGACAGTCTGTTTTT  
ATGTATTGCGTTGCTTAAACATGCTTTTCAGCAAGCGAGCAATACCATGAGTTGTTGGACAATGTGCTGAATGGGCCAATT  
AGCATCACGCTGAGAAATCGCATCCAGTGTATGTAATACGTGATGCAGCAAAGGATGAAATCATACTGAGGAGCCATTCT  
TAGTGTAAACGAAGTTACAATTGACCGAGGAATATCATCTTACCTTACCAACCTGGAAGTCTACTGTGACAGTTCTTTTGT  
ACTTGTGTACAAAGAGACGGACTAATCATATCAACCACATCTGGAAGTACAGCATATTCATTAGCAGCGAGGATCCATGGT  
TCATCCTCAGGTACGCTCCCAATTGATTATATGGCGTTTATTTGACCAATTTCAAGTCGTAACGCTTGGATTGTTACACAAATG  
TTCTTCCAGTGGGTACGAATCAGCATAGTTGCCCATCTGCCATTTCGCGCGTGGTTTCTAATGTCTAGCCGGCGTTTGCA  
GTCCCAAGGATCCTTTTACCCCAATCTGTCCGCACTCCTTGTCTATTAGACCTTTGATTCTGCCTGAATACGTGACTCTCCG  
CGTTCAAGTGCCGTACAAACAGCAGGGGGAATGCCGTGGCATCTTTCGATGGCAAAGATCGACAGCATCTCCCGCGGTGA  
CGCCCTGATCTGCAGCATTTCTCCTTGGCCTGTGCCACAGCCTGCCTGGTGGACTCGACCACCGATTTCCTCCGACGATC  
CATGAGGGTCTCCACTGGAACCTTGAGGAAATCCCAATCTTGAAGCGGCCGCGTGATTGATGCAACAGATTTTTCAGTTATAT  
ATCAGTCCAGTGCCAGATACTCAAACCTGGAATCCTCAAAGTGCAGTAAACATCAAGAGGAATAACTTACTACCTGAGGG  
TGCTCACCTTTACCGTTCCATTACTTATATATATATATACACACAAAGTTGCGTGCGTTTAGATATGAGGTATAGTGAGAG  
GTCCAAATATATAGCCATGGCCATGCATGTGTGTGACAGGTTTCTGTGCTTCAGTGCTCGATTATAGCACAGCTGGCAGAA  
ATATGTACACTGATTCCGGATAAAGTATGGGGTGAGATAGATAGGTATGGATGGCAACGACTGAACATGTTGAATAATACACC  
ACCAACGTATGACATGATGATCTGCTCCCCGATCTGAATGAAATAATCCGCTAGCCATACAAGATGAGATGATCTCCG  
TTACAGCTTGACGTCATGCGATCTGGGCACTTGTGACGGCTGATGGGGAAGCCCTCCGTCCCTTTTTCAGCTTCCATGCTGAT  
AACTGAACTGATGAATGGAGTCATGGAGTGGGCATGCTGTGCTGCTCCTCTGCTCCTGTGACGGCCAGATGGGTGCTGCT  
TCCGCTGATTCTGCGGCTGCTTTTGGCGTGAATTAAGGCCGAGTATATAAAATTAACCGCCGCGCCATGATTCTTTAA  
TCATTCCCTTCCACAGCTGCGGAGTGATGTACTCCAGTACGTAGTAGTCCAGTAGCGAGCTTGTGCGCGCGCGCTGCTC  
GCCTCAATCGCGTGCGGTGCTGTTCCGGCGAGCTGGATTCTCCGGCGACCCACCGCCAGCGTACAGAGCCGGGG  
GCGGGGTGGCATGGCCATGGCCAACCCGAGGACCGGGCGGGGACCGGAGAACGTGAAGTCTTTGTGCTTCTCCTTC  
TATCCAAACCTACCCCGCTCGCGAGTCACGGGCACTCCAGAGACGCGCGCGCCTGCATTTTCTGTTCTCTCCTCCCG  
CGGCTCCGATGGATGCT

>SsLRR-RLK168

ATTGGATGTGAAGCTTTCTTGATCCTATTGACAGTCTGTTTTTACGTATTGCGTTGTCCTTAAACATGTCTTTTCAGCAAGCG  
AGCAATACCATGAGTTGTTGGACAATGTGCTGAACGGGCCATTAGCATCACGCTGAGAAATCGCATCCAGTGTATGTAATA  
CGTGATGCAGCAAAGGATGAAATCATAACTGAGGAGCCATTCTTAGTGTAAACGAAGTTACAATTGACCGAGGAATATCAT  
CTTACTTACCAACCTGGAAGTCTACTGTGACAGTTCTTTTGTACTTGTGTACAAGGAGACGCAATCATATCAACACA  
TCTGGAAGTACAGCATATTCATTAGCAGCTGGAGGATCCATGGTTTATCCTCAGGTACGCTCCCAATTGATTTATATGGCGTTT  
ATTTGACCAATTTAGTCGTAACGCTTGGATTGTACACAAATGTTCTTCCAGTGGGTGAGCAATCAGCATTAGTTGTCCATC  
CTGCCATTTCCGCGTGGTTTCTAATGTCTAGCCGGCGTTTGCAAGTCCCAGGGATCCTTTTACCCCAATCTGTCCGCACTCC  
TTGCTATTACAGCTTTGATTCTGCCTGAATACGTGACTCTCCGCTTCAAGTGCCGTACAACAGCAGGGGGAATGCTGGG  
CATCCTTCGATGGCAAAGATCGACAGCAGCTATCGCCGGTGACGCCCTGATCTGCAGCAATTCTCCTTGGCCTGTGCCAC  
AGCCTGCCTGGTGGACTCGACCACCGATTCTCCTCCGAGATCCATGAGGGCCTCCACTGGAACCTTGAGGAAATCCCAATC  
ATTTGACGCGCGCGTATTGATGTGCAACAGATTTTTCAGTTATATCATGTCAGTCCAGTGCCAGAAATCAAGTCCCTAAG  
TGCAGCTAACATCAAGAGGAATAACTGTACCTACTCGAGGGTGTCTACCTTTACCGTTCCATTACTTATATATATATACAA  
AGTTGCGTGCGTTTAGATATGAGGTATAGTGCAGAGTCCAAATATATAGCCATGGTCATGCATGTGTGTGTACAGGTTTCTGTG  
CTTCAGTGCTGATTATAGCACACGTGGCAGAAGATGTACACTGATTCCGGATAAAGTATGGGGTGAGATAAATAGGTATG

GATGGCAACGACTGAACATGTTGAATAATACACCACCAACGTATGCATGTATACATGTGATCTGCTCCCCAGATCTGAATGAA  
ATAATCCCGTAGCCATAACAAGATGAGATGCTTCCGTTACAGCTTGCAGTCAATGCGATCTGGGCACTTTGTGACGACTGATGGG  
GAAGCCCTCCGTCCTTTTTCAGCTTCCATGCTGATAAATGAACTGATGAATGGAGTCATGGAGTGGGCATGCTCTGCTGCTG  
CTGCTCCTGCTCCTGTGACGGCCAGACTTGGAGTTGAGGGGCGAGGGCGATCGGTACGCGTTTTGAATTCGTGATCAGGA  
TTGACAAAAGTCGAGTAGCTTTCGACGGCTGCTTTTTCGCTGAATTAAGGCCGAGTATAGTATAGAAAATAAAAACGGCCGG  
CGTATGATCTTTAATCATTGCTTTCCACAGCTGCAGCGCGCTGCTCGCCTCAATCGCCGTGCGGTGCTGTTCCGGCGA  
GCTGGATTCTCCGGCGACCCACCGCCAGCGTCACAGTGGCATGGCCATGGCCAACCCGAGGACCCGAGAACCGTGAAG  
TCCTTTGTTTCTTCTCTGTCCAAACCTACCCAGCGACTCGCGAGTCACGGGCAAGGGCAACCCAATCCAGCGACGCGCC  
TGTTCTCTCTCTCCCCGGGCTCCGATGGATGCCTCCACCATGCACACCCCAAAAACACAGCTCGGCGCCGGTACCACACG  
GCACCTACCCCTCTCTCCGCGCCACTAGATCTCATCCACCGTCATCGCCACTGCCACCATACTATCCCATCCCGGAAAATACAT  
TCTGCACCCGAGAAA

>SsLRR-RLK41

TGGAGGGAGTATTTTACTACATCGTACTAATCTATGTTATACTCCCTAAAAATATTTCATGTTTTGATACCTCTGACTACTTATT  
ACATTACATTGGTGAATCCACCAGTACGGAGTACGCCCTAACGAAATCTCTCTCTCCCTCCCTCTCTCTCCACAAACTAACAA  
GAGTTTTATGCAGATCTTGTAGGACGGACGATAGCTGGCATATCAATACCCAGTGTTACGCTTGAAGTACAACGAAGGCCCT  
GTTCCGGCAGGCTATTTTTTGGCTTATAAGCTGGCTGTGGCTGATTGCTGTGAAAGAAAAATACTGTTCCATGGCTGATAAGC  
CGTCTGATAAGCTCAGCGGAACAGGGGGGAAACATCAGCATATACCTCAGTTGCAATTTGATTGGACCTCACACTCACA  
CACTTCGGTTTCAGGTTTGCCTTGCAGAATTCAGATTCTATCTATATCTATTTGAAAGCCCCCTTTCTCTCTAATGCCCTCAAG  
CATTTTTACAGTCGTCCATCAATTTAGCGCCAAATACAAACAAACATGCGTGCGTTCCATCGTGACTTACTCCAATATCCTC  
ACAAATCACAAAGAGCAGAGTACTACTACTAGTTAACTGGAATGCTTTTTGCCAAGGTAGTATCTCTTGCCGTCTAGTTTCCC  
GTGGATTCTAAAGATTTTGTAGAAATTTAAACAGAGAGATTTTGATTATCTACTCTATTTATCCCTCCCTTTGGGAGGCTAAAGAGAT  
TTTTTTTCCACGGTTCTAAATCGAATCAGGCCTTGTTTATGATGCCTTCAAATTTCTAGTTTTTACTTTTTCTGCTCTGTCACATC  
AAATCTTTAAACATATGCATGGAGCATTAAATATAGATAAAAAATAATTAGTTTGGTTGTAAATCACGATACGAATCTTTTAA  
CTAAATTAGCTATAAATTGGACACTAATTGCTAAATACAAACGAAATGCTACAATAATTAAATTCGAAAGTTTTTGCAATTA  
ACACCTCTCAAACAGGGCGAATGAATGAACAACCTTGTTGGCGTGGCGTATCCAAACGATAGAATCTGATCGCGCGGCCATG  
GATTCCTTTGCAGCAGCTGCAGCGCCAGAACGCGAGAATTCACACCACCTCCAAAGACGGGAAGAAGACTAGCAAAGCT  
CCGGTGCCCGTAGGCCCTATACCAAACGCAAAACCCGACGCGTAGAGGAGGCAGGCGGGCACGCCTCGCCTCAAAGC  
ACCGCGACGAGTCTGCTGCGGTGCTGCGGTGAGCTGCTCGTACCGTCCGATCAGCTCTGGCCCTACCCTGGAGCTGGAGCACC  
CCCCGCGGCCCGCGCGAGTTTCGAGGAGGAACCCAGCGCACGCACGGCACGGGCGTCCGCCCGTTGCCCCCTCGGT  
CCCGGTCCGTGCGCGCGGCCATCCCGTCTGCGCGCGCCTACCGCCCGCCCTTTTAGCCGAGGCCACCGCCATCTCGCG  
GCCATCCCGTCCCTCGGTGCTGCGGTGAGCCTGCTCGTACCGTCCGATCAGCTCTGGCCCTACCCTGGAGCTGGAGCACC  
TTTCTTTCCCCCTCACTCCTTGCTCTTTTCTCTCTGCTACTCCAGTCTCAGCCACTCTCCGTGCTCCCTCTCTCTCTCTCC  
CTGCTGCATTCTCAATGGAGTTTTCCGGCGAGTCTGCTGCGCGCGCGCAACGACGCTAGACGGGTGCATCCTGGCTCGGC  
AGGTACTCAACCAACTTGCTACTACAAGGCTGTTCTGCGAGCCATATCTGGAGCTCAATCCACTCACATTTGTGTCTTCAG  
TACTCCGAGGAAGGAGATACCATTAGAAGCTTTGAGGTGCTCAGCGCAGATTTAATCAAGCCACACCCCGGAG  
GGCTCCGTTCTCTCCGCCGATTGTTTTCTGCTGACCCCTGAGCATTATTTGCGCGCGCGCCCTCTTGCTTCGCTC  
CGTCTATCTGAGCAA

>SsLRR-RLK366

GGAGGGAGTATTTTACTACATCGTACTAATCTATGTTATACTCCCTAAAAATATTTCATGTTTTGATACCTCTGACTACTTATTA  
CATTACATTGGTGAATCCACCAGTACGGAGTACGCCCTAACGAAATCTCTCTCTCCCTCCCTCTCTCTCCACAAACTAACAAAG  
AGTTTTATGCAGATCTTGTAGGACGGACGATAGCTGGCATATCAATACCCAGTGTTACGCTTGAAGTACAACGAAGGCCCTGT  
TCGGCAGGCTATTTTTTGGCTTATAAGCTGGCTGTGGCTGATTTGCTGTGAAAGAAAAATACTGTTCCATGGCTGATAAGCCG  
TGCTGATAAGCTCAGCCGAACAGGGGGGAAACATCAGCATATAATCCTCAGTTGCAATTTGATTGGACCTCACACTCACACA  
CTTCGGTTTTCAGGTTTGCCTTGCAGAATTTAGATTCTATCTATATCTATTTGAAAGCCCCCTTTCTCTCTAATGCCCTCAAGCA  
TTTTTACAGTCTGTCATCAATTTAGCGCCAAATACAAACAAACATGCGTGCGTTCCATCGTGACTTACCAATCTCTCAAC  
AAATCACAAAGAGCAGAGTACTACTACTAGTTAACTGGAATGCTTTTTGCCAAGGTAGTATCTCTTGCCGTCTAGTTTCCCGT  
GGATTCTAAGATTTTGTAGAAATTTAAACAGAGAGATTTTGATTATCTACTCTATTTATCCCTCCCTTTGGGAGGCTAAAGAGATT  
TTTTTCCACGGTTCTAAATCGAATCAGGCCTTGTTTATGATGCCTTCAAATTTCTAGTTTTTACTTTTTCTGCTCTGTCACATCA  
AATCTTTAAACATATGCATGGAGCATTAAATATAGATAAAAAATAATTAGTTTGGTTGTAAATCACGATACGAATCTTTTAAACT  
AAATTAGTCCATAATTGGACACTAATTGCTAAATACAAACGAAATGCTACAATAATTAAATTCGAAAGTTTTTGCAATTA  
CACCTCTCAAACAGGGCGAATGAATGAACAACCTTGTTGGCGTGGCGTATCCAAACGATAGAATCTGATCGCGCGGCCATGG  
ATCTCTTTCAGCAGCTGACGCGCCAGAACGCGAGAATTCACACCCTCCAAAGACGGGAAGAAGACTAGCAAAGCTC  
CGGTGCCCGTAGGCCCTATACCAAACGCAAAACCCGACGCGTAGAGGAGGCAGGCGGGCACGCCTCGCCTCAAAGCA  
CCGGCGACGAGTCCAGCTGCGGTCTTACTCGCGGACTCGCCCGACCGGACCGGTCCAGTGCAGCTGCGGCCTCGAAC  
CCCGCGGCCCCACGCGAGTTTCGAGGAGTAACCCAGCACGCGACGGCACGGGCGTCCGCCCGTTGCCCCCTCGGTCCC  
GGTCTATGCACCCCGGCCATCTGTCTGCGCGCGCTACCGCCCGCCCTTTTAGCCGAGGCCAGCACCTATCTCGCGCC  
CATCCCGTCCCTCGGTGCTGCGGTGAGCCTGCTCGTACCGTCCGATCAGCTCTGGCCCTACCCTGGAGCTGGAGCACCTTT  
CTTCCCCCTCACTCCTTGCTCTTTTCTCTCTGCTACTCCAGTCTCAGCCACTCTCCGTGCTCCCTCTCTCTCTCTCCCT  
GCCTGCATTCTCAATGGAGTTTTCCGGCGAGTCTGCTGCGCGCGCGCAACGACGCTAGACGGGTGCATCCTGGCTCGGCA  
GGTACTCAACCAACTCTGCTACTACAAGGCTGTTCTGCGAGCCATATCTGGAGCTCAATCCACTCACATTTGTGTCTTCAGT  
ACTCCGAGGAAGGGAAGGTATACCATTAGAAGCTTTGAGGTGCTCAGCGCAGATTTAATCAAGCCACACCCCGGAG  
GCTCCGTCTCTCCGCCGATTGTTTTCTGCTGACCCCTGAGCATTATTTGCGCGCGCGCCCTCTTGCTTCGCTC  
GTCTATCTGAGCAATG

>SsLRR-RLK4

TTTTTTAAAAAATCTACTCAAAAATAATTAGAGTAACTAGACTTAGAACAAAATCTAAATGAACATGATTTAAAAACAGAGA  
AAGTACTTGAATGGCTAGGACAACCTAAAAACTAGAAAAAGGGTTGTTTTATTGCGAACACATCGGTAACAATTTGGACCA  
TTCATCTTCCACCTCTCACGTTTCAGTACAACATATGAAACTAGGAGAATACAGATATATAAAATACTGTATATCGGAAGATGAT  
CTCTTTCTCATTTATTTTCGGAATAATTGAACGTGACAATGTTTTTTTTTCTCTCCTATATCTAGGATAACGTCATGTTATGGT  
ATGAAGCCATGAGTATTCAGGTATATGATTATTAATAACATGTTTTTACTACATCGTACTAATCTATGTTATATACTCCCTAAACAT  
ATTTCCATGTTTTGATACCTCTGGCTACTTATTACATTACTGATGCCATCCACCAGTACGGAGTACGCCCTAACCAATCTCT  
CTCTCTCTCTCCACAAACTAACAGAGTTTTATGCAGATTTTGTAGGACGGACGATAGCTGGCATATCAATACCCAGTGTT  
ACACTTGAAGTACAACGAAACATCAGCATATAATCCTCAGTTGCAATTTGATTGGACCTCACACTCACTTCGGTTTCAGTTTT  
GCCTTGCAGAATTCAGATTTTATCTATATCTATTTGAAAGCCCCCTTTCTCTCTAATGCCCTCAACCATTTTTCAGAGTTGTC  
ATCAATTTAGCGCCAAATACAAACATGATGCGTTCCATCTGCTGACTTACTCAATATCTCACAATACAAAGAGATGTTAA  
CTGGAATGCTTTTTGCCAAGGTAGTATCTCTTGCCATCTACTTTCCCGTGGATTCTAAGATTTTGTAGAAATTTAAACAGAGAGAT  
TTTGATTATCTACTCTATTTATCCCTCCCTCTGGGAGGCTAAAGAGAAATTTTTTCCACGGTTATGGATTCTAAATTCGATTCAAA  
CAGGACCCGAATGAATGAACAACCTTGTTGGCGTATCCAAACGATGTAATCTGATCGCGCGGCCATGGATTCTTTGACGAC  
GGCTGCAACGCGCGAACCAGAACCCAGAACGCGAGAATTCACACCACCTCCAAAGACGGGAAGAAGACTAGCAAAGCTC  
CGGTGCTGTAGGCCCTATACCAAACGCAAAACCCGACGCGTAGAGGAGGCAGGCGGGCACGCCTCGCCTCAAAGCA  
CCGGCGACGAGTCCAGCTGCGGTCTACTCGCGGACTCGCCCGACCGGACCGTCCAGTGCAGCTGCGGCCTCGAAC



CCCCGGCCCCACGCGAGTTTCGAGGAGGAACCCAGCGCACGACACGGGCGTCCGCCCCGTTGCCCACTGGGTC  
CCGGTCCATGCACCCGGGCCATCCCGTCTGCGCGCGCCTACCGCCCGCCCTTTAGCCGGAGCCACCACCTCCTCGCGG  
CCCATCCCGTCCCTCAGTCGTGCGGTGAGCCTGCTCGTCACCGTCCGATCAGCTCTGGCCCCACCCTGGAGCTGGACACCT  
TTCTTTCCCCCCTCACTCCTTGCTCTTTCTCTCTCTCGTACTCCAGTCTCAGCCCCACTCTCCGCTGCTCCCTCTCTCTCC  
CTGCTGCATTCTTCAATGGAGTTTTCGGGCGAGTCGGCGCGCGCGGGCGCAACGACGTAGACGGGTGCATCCTGGCTCGG  
CAGGTACTCAACCAACTCTGCTACTACAAGTTGTTCTGCGAGCCATATCTGGAGCTCAATCCACTCACATTGTGTCTTCA  
GTACTCCGCGAGGAAGGGAGAAGGTATACCATTAGAAGCTTTGAGGTCGTACGTCAGATTTAATCAAGCCACACCCCGG  
AGGCTCCGTTCTCCCGCGATTCTGCTTCTGCTGACCCCTGAGCATTATTATGCGCCGCGCGCCTCCTTGTGCTTCGC  
CTCGTCTAGCTGAGCAA

>SsLRR-RLK45

TAGAGTAATCCCCAGAACTCAATAGTTCTCTTCATAACTATGTACCTCTGATTGCAATAAATAATAAATAAATAGACTATTGT  
GACACTCTGGTGCCTAGTCATGATCTTGATACTGAACCTTGCAATGGGGGATGCTCTAATCTCCAGTTGAGCATTGGCATGCGG  
ATGCTCTAATCTCCTTTAGGAAGCAAGTGAATGCTGTTATGCTCAATAGATATATAAAAGGCATTTGTGGTTACGTACAAAG  
ATGTCATAATGTTTTTGTGGGAAAAAACGTTTTAGAAAATATGAGTCTAGAAGGAAAAATGGANNNNNNNNNNNNNNNNNN  
NNNNNNNNNNNNNNNNNNNNNNNNNNNNNNNNNNNNNNNNNNNNNNNNNNNNNNNNNNNNNNNNNNNNNNNNNNNNNN  
NNNNNNNACAATATTTCCATGTTTTGATACCTCTGGCTACTTATTACATTACATTGGTGAATCCACCAAGTACGGAGTACGCCCT  
AACGAAATCTCTCTCTCTCTCTCCACAACTAACAGGTTTATGTCAGATTTTGTAGGACGGACGATAGTACGATATCA  
ATACCCAGTGTTACACTTGAAGTACAACGAAACATCAGCATATAATCCTCAGTTGCAATTTGATTGGACCTCACACTCACTTC  
GGTTTCAGTTTTCGCTTGCAGAAATTCAGATTTTATCTATATCTATTGAAAGCCCCCTTTTCTCTCTAATGCCCTCAACCATTTT  
TCACAGTTGTCCATCAATTTAGCGCCAAATACAAACATGCATGCGTTCCATCGTGACTTACTCCAATATCCTCACAAATCACA  
AAGAGTAGTTAACTGGAATGCTTTTGCCAAAGGTAGTATCTCTTGCCATCTACTTTCCCGTGGATTCTAAGATTTTGAAGATTT  
AAACAGAGAGATTTTGATTATCTACTTATTATCCCTCCCTCTGGGGGCTAAAGAGAATTTTTCACCGGTTATGGATTCTAAA  
ATCGATTCAAACAGGACCCGAATGAATGAACAACCTGTTGGCGTATCCAAACGATGGAATCTGATCGCGCGGCCATGGATTG  
CTTTCGAGCCCGGCTGCAACGCGGGAACCCAGAGCCAGACGAGAAATTCACACCACCTCCAAAGACGGGAAGAGACT  
AGCAAAGCTCCGGTGCCTGTAGGCCCTATACCAAACGCAACCCGACGCGAGCTAGAGGAGGACGGCGGGCACGCCTCGC  
CTCAAAAGCACCGGCGACGAGTCCAGCTGCCGGTCTACTCGCGGACTCGCCCGGACCGGACAGTCCAGTGCAGCGCTGC  
GGCTCGAACCCTCGCGGCCACCGGAGTTTCGAGGAGTAACCCAGCACACGCGGACGCGGCGTCCGCCCCGTTGCC  
CCCTCGGTCCGGCTGACCCCGGCCATCTGCTGTCGCGCGCCCTACCGCCCCGCCCTTTTAGCGGAGGAAAGAACCA  
TCCTCGCGGCCATCCCGTCCCTCGGTGCTGCGGTGAGCCTGCTCGTCACCGTCCGATCAGCTCTGGCCCTACCCTGGAGCT  
GGAGACCTTTCTTTCCCCCTCACTCCTTTTTCTCTCTTTCTCTCTCGTACTCCAGTCTCAGCCCACTCTCCGCTGCTC  
CTCCCTCTCTCCCTGCTCTCTCTCAATGGAGTTTCCGGCGAGTCGGCGCGCGGCGGCGCAACGACGTAGACGGGTGC  
ATCCTGGCTCGGCAGGTACTCAACCAACTCTGCTACTACAAGGTGTTCTGCGAGCCATATCTGGAGCTCAATCCACTCAC  
ATTTGTGCTTTCAGTACTCCGCGAGGAAGGGAGAAGGTATACCATTAGAAGCTTTGAGGTGTCACGCGCAGATTTAATCCAG  
CCACACCCCGGAGGCTCCGTTCTCCCGCGATTCTGCTTCTGCTGACCCCTGAGCATTATTATGCGCCGCGCGCCGCTC  
CTTGTGCTTCGCTCTGCTAGCTGAG

>SsLRR-RLK55

TCCTAATGCCCTCGAACATTTTTTCACAGTTGTCCATCAATTTAGCGCCAAATACAAACATGCATGCGTTCCATCGTGACTTAC  
TCCAATATCCTCAACAATCACAAGAGTAGTTAACTGGAATGCTTTTGCCAAGGTAGTATCTTTGCCATCTACTTTCCCGTG  
GATTCTAAGATTTTTTGAATTTAAACAGAGAGATTTTGATTATCTACTATAGATCCCTCCCTTTGGGGAGGCTAAAGAGATTTT  
TTTTCCACGGTTATGGATTCTAAATCGATTCAAACAGGGCCCGAATGAATGAACAACCTGTTGGCGTATCCAAACGATAGA  
ATCTGATCGCGCGGCCATGGATTCTTTGCGACACGGCTGCAACGCCAGAACCCAGAACCCAGAACCCAGAACCCAGAACCC  
CCGCTTGTTTAGGGCTGTTTAGTTGCACCCCTAAATACCAATTTTTTAAGATTTCTGTCACATCAAACTTTTGACGCAT  
GCATGAAGTATTAATATAGATAAAAAATAAACTAATTACACAGTTTAGACGAAATGGATGAGACGAATCTTTAAGTCTAA  
TTAGACCATGATTTGACAATATTTACCAATAACAACGAAACCGCTACAGTAGCGTTTTTGCCAAAAATTTGCGCATCCAAACG  
GTGCTTAGATACCAAGCCCTGTTTAGTTGCCAACCCTTCCCTAAATTTCTACTATGCAAAAAAGAAAGATTTCCCGTCAACAT  
GAAATATCGGCATATGCATAAAGTACTCAACGTAGATAAAATAAAAACTAATTGCACAGTTATGGAGTACTTTGCGAGACGA  
ACATTTTGAGACTAATTAATCAATGTTGGACAATTATTACCAATAAAAAACAAATGCTACAGTACCAAAACAGGGTTGCTAC  
AGTAAGTCAGATGCCCCGAATTCAGTATCTAAACCAGGCCCAATTCCTCCAAATTCCTACTATGCAAAAAAGAAAGATTTCC  
CATCATCAAAATGTGCGCACATATATAGAGTACTAATGTAGATGAAATCAAAACTAATTGCACAGTTTGTCTACTT  
TGCGAGACGAATATTTTAAACCTAATTAATCAATGTTTGACAATTATTATCAATAAAAAATAAAATTACTATAATATGACAGGA  
CACTTGGTATGCAAACTTTGTCTCAAAGTTTAGAATCTAAACAGGCCACCTCTAAAGACGGGAAGAAAGACTAGCAAAAG  
CCAGCCCGCTCAAAAACACCGACGACGAGTCCAGTCCGCGTCTACTCGCGGACTCGCCCGAACCGGACCGGCTCCAG  
TGCGGCTGCGGCTCGAACCCCGCGGCCACCGGAGTTTCGAGGAGGAACCCAGCGCACGCCCCGTTGCCCCCTCG  
GTCCCGGTCCATGCACCCGGCCATCCCGTCTGCGCGCGCCTACCGCCCCGCCCTTTAGCCGGAGCCACCACCATCCTCG  
CGGCCCATCCCGTCCCTCAGTCGTGCGGTGAGCCTGCTCGTACCCGTCCAATCAGCTCTGGCCCTACCCTGGAGCTGGAGCA  
CCTTCTTTCCCCCTCACTCTTGCTCTTTTCTCTCTCGTACTCCAGTCTCAGCCCACTCTCCGCTGCTTGTCTTCTCTC  
CCTGCTGCTTCTCAATGGAGTTTTCGGCGAGTCGGCGCGCGGCGGCGCAACGACGTAGACGGGTGCATCCTGGCTCG  
GCAGGTACTCAACCAACTCTGCTACTACAAGGTGTTCTGCGAGCCATATCTGGAGCTCAATCCACTCACATTTGTGTCTTC  
AGTACTCCGCGAGGAAGGGAGAAGGTATACCATTAGAAGCTTTGAGGTGTCACGCGCAGATTTAATCAAGCCACACCCCGG  
GAGGCTCCGTTCTCCCGCGATTCTGCTTCTGCTGACCCCTGAGCAITTTATTGCGCGCGCGCCGCTCCTTGTGCTTCG  
CCTCGTCTAGCTGAGCA

>SsLRR-RLK355

AGCTGGAGGCTAACTTCACATTTTTTCTAGAGCACCTCAAGAGAGAGAGGTATCCAGTTTTTTGAGTTTTTAACTCCCACAT  
GGAGTTGTGCGGTAATTACCCACCTTGCCACTCATTAATACCAATTACTTTTCCTTGTTCGCTAACGGACCATTTGCAATTTT  
AATTAGGGGCATAATGGACCATTTGCATGTAAACAACCTTATCTCGGAACAGAGCTAGACTATGTGCCAAACACGTACCACT  
TGCTCCACAACTCTATGGTTGAACCTTTATGGTGAATTTGCGGAGCGGAGTTGCAAAACAGGAGTAGAGCAGCAGT  
CCCGCACCAACAGAACTCAATTAACAATGGTACCATGATCTACCCCTCCACATCCTCTTCTACCGTCAAGGTATTATGGGACC  
CCTGCTTCTAGTCACGTTAGTCTTGGTTGTACATAGTATGTTACTAGACAAAAATGATTTTAAATGCTAAATCTTCTGCAT  
ATTAATAAATGAATGACGTATGTGTGCTTGAATGTGAATACACGAGTATACTACTAGCACACGAACCTCAATTAATAA  
ACTACACACCATGATCACCTCCACCTCCTCTATCGTCTGAGTGAATGTGGATCCTCCTGCTCTCTCTGTTAG  
CCTTCTTTTCTAAAAAAAAGTCATGTTAGCCTTGGATGTAGTAGATAATAGTATGTTGCCAGATAAAATGATTTTAAATAAATG  
CTAAAGCTTCTACATATTTAAAAAAAATAAAATGCTATATCTATGCTACTTAGAATATGAAATCTCGAGTATATACTACCAGC  
ACATGAACCTCAACCAATGAACAACCTTACTGTTGTTCTCACCTCATCGTGGCAATGGCCATGGTGGAAACACCCCACTACC  
TTTTCTAGTCAACATGACCTTGGTTGTAGATAATATACGGGTAGACAAAAATGAATTTTAAAGTGCTATCGGCGGTGTTGTTT  
ACGCGAGCCATGCTCGCTAAGCCGCGGCTGCGCCAAATGCAGCAATAAAACGGCCACCACACCTGCGGCGTGAGTT  
GGCGATGGAATGAACACGCGCGTGTGGTGTGAGTGCGGCGTGCCAAACCGCTGCGGCAACCAACACGATGTGAGA  
CGCCGATTTTGGCGGTGACCGGTACGTGCGCAAGTAGGTGTGAACCAATCAGCTCTAAATCTTCTGCATATTAAAGAAAGT  
ATAATATATCTATGCTCACTTAAATATGAATCTCGAGTGTGACGATGGACCAATGCCAAAGGAAGAAAAACATTAATGCAC  
CGGTTTTTCATCTCTACCAAAACCAACGAGTCTAATAACAAAGACAAGACACATCATATTAGACCCTATGGTTAATGGTCAG  
CACCTCTCAAGATTTGCTGCTCTACTCTTGCTCCTCTTGCGTTGTGGTAACACTGCCAACCCCTCCCAATCTCTAAAAAATT

>SsLRR-RLK362

>SsLRR-RLK377

>SsLRR-RLK144

FOIA b 7(C) - The disclosure of the information requested by the subject of this document would be likely to result in the identification of confidential sources and methods of the FBI, and thus would be withheld from public release.

AGAAAAATCATATCCATTGAGGCAAAAGCTCATGGAAAAATGATAAACAGATCATTTTGTCCATTCTTACTTGTCTACTCGT  
AGCGCATTAAGTAGTGAAGGGGGCGCTCTCTCTACTCGCTTCTCCCTCTCCCCACTCGTGTCTGGCTGACTGCTCCACG  
CCGCGCGTACGACCAACGACCGCGCGGCCACGCCACCGCCACCAACCGCGCTGCACTGCGCCACTACCCCTCTCCCG  
GCACTGCCCCAGAACTGCTCCGCGCAAATGGACAGAGCACCCTGTGATCCCTCCACCGTCTCATCTCTACTGCCCCGCG  
GTGTGCGG

>SsLRR-RLK185

AAAGTTTTCTTTGTGTCACCTCTCTCATCCAATTTATGTTTTCTGTGCTCTATTCAAATCTTATAGTTTTCTTGTGTTTTATGTTTTCT  
CAGTCCATAGAATTTAAGATGTTAGGGTTATTTCTACGTTTTTATAATCCTGGGTTCTAAAGAGTCCCTTAGGCGTAGTACAGT  
TAATATAAAAAATAGGTAGATATAGGTCCACTTTGGTAAGAGAAATGAAGGCAAGTAAATTTTTGGTTAAGAAAAATTTTTGTT  
GAACCGTAACAAGCACATGGCTTGTACAATTTGTGTTGTACAATCCAGGCCTCTTTCTGGATTATGGATAAAAAATACAATAAT  
CTAGATTAGGGTGCTAGATCAGTTGGTCTAGACACTCCGACGGCACCCCTCTAGTCTGAGTTCAACTTCTCGTGAGAACGA  
ATTTCAAGGCTGAAAGTAAAGATACCCCTCATCCGTCGCCATAACCAAAGCACTGGGGGGCCCTGACCCAATTTCTCACTTGGG  
CGACGGTAAAGCCACCGTGAAGGGTGGGGGGCGAGGGTTCGGAGATTTTCTCGCGGGGTGAGAAGGCCATCTCCTTCTT  
ATTTGGAAATGTTGCGGCGGTAGTCTTAAACCGCCCGGAGTGTTTTTTAATTGTAATTTTTCCGTTCTAAATTTCTAAATTTG  
TTTTGTTTTTTTCTAATTGCATATCTTTATTTGTATAGTCTAACCTGACCTATATTAGGTGCATAGTGTACCAATATAACTAAAA  
CAATTAGATCAACTTAGAATTTAGAACAGAGGGAGTAATAAGCTAGACTATTTTCGATCTCTAGATTATATAGGTGGATTATTATT  
AATTTGGAGTACAAATGATCTATAATCTTGAACCGCATATTAATTAGAGTACAAACGATCTATAATCTTGAACAAAGCATATTTT  
AGATATTGTAGGACTACAATAATCTAATGGTTGAATTTGTATAATCCAACCTATGATTGAGGTGTTTGGATTACCTTTAGATTG  
TTTTTTTCTGGTCACTATAATCTAGTACTAGTTGGTATCAACACTTAGGACATGTTTGATTAGTTTGTACTTCATCTGTTATA  
AATTATAAGGCATTTTAACTTTATAGGTGCATTGTTTTTTTATTTATGTATCTAAATATAATGTATACCATGTACATAGCGAAAGCT  
ATAAATCTAAAAAATTAAGAACGCTCTTTAATTTGAAATTTGAACCGGAGGGAATGCTTTGTAAGAACGTCATGCAAT  
CCATAGTCTAAGCGGGAAGTAAAGTAAAGCTGAAATACACGGCGCATGTACAGCACAAGACACTAGTCTCTGATGT  
TCCTTTTTTTCTTTTGCTTTTCCCCCAAGGGAATTTCCAATTTGAAGGAAATAATAAAACAATGTATCTTCAGGATTAAAGTAG  
GTATTTATACTCGTACGACATTAATAGCGCAAGGGGCGCCCTCTCTCTACTCGCTTCTCCCTCACCCCACTGGTGTCTGG  
TTTTGTCCATTCCAAGGCCTTGTTTACTTTGCAAAAAATTGAACCTGATGAATAGTACCGCTTTCGTCTTATTTAGCAAATATT  
GTCCAATCATAGACCAACTAGGCTCAAAAGATTCTCTCGTGATTTCCAACTAAACTGTGTAATTAGTTATTTATTTATCTAC  
ATTTAATACTCCATGCAAGCAGCTAAAAATTGATGTGATGGAGAGAGAGTGAAAAAACTTTTGGATGGCATCTAAACAAGCC  
CTTTGATCTGATCGTACATTAATAGCGCAAGGGGCGCCCTCTCTCTACTCGCTTCTCCCTCACCCCACTGGTGTCTGG  
CTGACTGCTCCACGCGCGCGCGGACCAACGACCAACCGCGCTGCACTGCGCCACTACCCCTCTTCCCGCACTGCCCCAGA  
ACTGCTCCGCGCAAAATGGACAGAGCACCCTGTGATCCCTCCACCGTCTCATCTCATACTGCCCCCGGTGTGCGCA

>SsLRR-RLK244

GTGTAGCCTTTATCACATAGGAGTAAGTAGCTTAGTGACTTAGTCTTGTGGTGTGTATTAGAGATCATAGCCTTGCTTCACTA  
GAATTATATAGATAGCTTGTATAGTGTAGTTGAGCTAGTGCTAGAATTAGCTTAGCCATCTTTTATACTAACGTAGTTGTTTAGT  
GAAGCTTATAGATTTTAAATAGGCTATTACCCCCCTCTAGCCATTTGGACCTTTCAAGCTCACACCAACAACCTAAGTTACT  
AGGCTAATTAATCTCTATGAGAAAACTATTCTACTCAAGCTAAACAAGGCAAAGAACAATAACTAAAGAAGAGAGCTTGAAT  
AGATATACCTACGTTAATGAGAAGAGATATGTCCAATATACCAATCAATCAATGTGATCACATACACAAATGAAATCTCGGCA  
ATAAGATGACATAAGATTTTTTATCGAGGTTCACTTGCTTCCCGGCAAGTTACTCTCTGTTGTGGCGATACACCCACTTGATG  
GATCAGAGCTAATCAACTATCAAGAGTTAAATGCTCAACGGGTTCCGACATCCACTCACAAAGATGACCCCAACGCGACATC  
TGCAAAACCCACCTAACCCCAACAGATGTCTGTGCCCCGTCCGACCCACGCGGCGTTTGACCCCAACAGACCCGTCGTG  
CCCTCTAGCAGCTGCAGCATGTTGCAACATGCACGTGCAAAAATATTCTGATCTACTTTTGAAACAGCCAGATGCAACATTTAA  
ACATATCTCTTAAGGCAGATGAAATACTTGAAGCATGCGTATGAAGCACTCACAAAAACACCTAGAAGACACTTGAAAACTCA  
TTGCAAAAACATACACAACATTCAGATAAAACACATGCAACATATGTGAAACATATGCAACATACAGATTACATCTTACAA  
CATGCATAAAAAAACAGATGAAACATTGGAACAGACGTTTGAACATGGGTGTACACCCATTGCAACATATGTAATATCCC  
GATCTACTTTGCAACTATCCATACGAAAAACATTAACAGCTACTGAAATCATCTGAAATACTTGAAACATACGTTTGAACA  
TGCGTTTGCAACTATGAGGAAGGGAGCGGAGGTGACGACGCAAGAGTCAAGTTCAGTTCAAGTCTGGCCACTCGGACTCGTG  
ATGTCGCGAGCTAAGGTCAAGCGTCGCGGCGGGGTGACGTCGCAAGGGCCATGACCTCTTGGTGGGGAACGGCGGCGGC  
AGCAGACCTCGACCCGCGGAGGGATGCGACACCGTGCACAGGGCGAGGGACCTCGCACACACGACAAGCCGGAGCGG  
GCACGGCGGGGATGGAGCACGGCGCGGCTCGACACAGGATGGGGGAGCCGCCGAGGGCGGCTTGGGACAGACGGATGG  
CAGGTGAGCTGCGACGAGCCAAGTAAGGAGTTGAGGATTTCTATCGGCTGTCTGATGTCAGATAAAGTAGACAGAGAAGA  
GAACGTAGATGGGTCTATTGGGCCAGTCGTTGTGCTGGCTCGAGAACCGAAATAGGTCGTGAGAACGGATGGACGCCA  
GAGTATTAGTGAACATCACCAGCAAAAGCACATGAATTTCTTGCTGAATACTGGCCTGGTCTATAAACCGAGTCCGATAATC  
GGAGGTACCTTTCCGTTCTTCCGTTCTGGAACATGTACACAGCCCAAGGCAACCGGAGAATTACCGAACAGAGACTCCG  
GCCTCAAAACCGAGTCCGATGATCCGAACGTCGAGACACCGGATCCGATGATCCGAACGTCGAGACCCGAGTCCGAG  
TCCGAGTCCGAGTCCGAGTCCGATTCTGTAAGAAGCTACTCCAGCCAGGCTAATAAAAGGAGGCGCGCCCTTGCTTCTC  
TCCACCAAAACCGAAGGCACCGTTTCGCCAAGCCTTCAGCAAAACGAAACGCAAGGTGCAAGCCACCAAGCCACGACACGAA  
CACTGTCTGCGGCTGCGCCCTGCAAAACCGCAGAAA

>SsLRR-RLK108

TATCTCTGATGGCAACAGGGATATCGATGATCTTCCCTGATATTGGGTGACCATTAAGTCAGATGACTGCAGCATATCTATGA  
CTGAGCAGAATTTGCTGCATTCTCTGGTAGCCTTGTTCTTCCAGTTCTCTTTTGCAAAATTCCAAACCTCTGAACATCT  
AACCCTCTGTTAAGATATTTTTCAGATAGTCTGACTATCTAACCCCTTAAAAACTATCTAGGCTGTATTTTGTCTTCCAAC  
TGTTGGTTGCATGCAAAATACATGGGTGTTATTCCTTTCAGAAATGACATGATAGACTACCCTGTGAAAAATAGGATAGCT  
AACAGCCTAACACCAAGGACCAAAATCTGGCATTCCTCTAGTTTTGGTCCCTATCCCTAGAGGGGAATGCTGACTGATGGCCT  
GTGAACTTTTGGAGTGCAGTAATGATGTTTGGTTTCAGATAACTAGGCTAAACTTTAGGCAACGTCGCTAGCCCAAGTAAAC  
AGTCAAGTTTGGATGTTGAGAAATCTTCATCTTTTAAATATAATGATATGCAGCTCTCTGCGTGATCGAGAAAAAATCTTC  
AAGAGGAACATCAGGAGGGAAATCTCGCTTATTCCTTCTGAAGTTCTCTGTGTTGCTATGTTTCTGAACCTATGGGCTATGGT  
CACTTTTAAAGGTATGATTTGGATGTTTGGTTTCAGCTGACTCTGACAAGACATGTACCCAGTATCAATATAGTCTGGAATTGATT  
ATGGGTGGTTTAAAGGGGGTACGGCAGAATAGATGTCGCTGCTGCCAGTAGTTTCAGAAGGTACGCTTATGATTGGGTTA  
CCCTAAGAAAAATATGAGCCCTCACCTCTCAGCCTTAAAAATACCATGCAAAATAGGCATGGAAATTTTCTCAACACTTTGATG  
TATAGAATGTGATATCATGTAGCATCCTACTAAATTTTCAACTCAAACTCTGAATATACAAGAGAAATCGAAAAATCAAAATTTG  
AATGCTCGTTATTATCTCTTCCGATTCCCTGAAAAGTTATCTTTTTTTTGTTCCTCTGTAAGGCTAGCTGTTGTTGAATTG  
GAATTGGAATCTGTTTGGATGGATGCTTGATGCTAGCATACTGCACATCCATGATTTTTCTTCGAGCTTTTCATGACTTACTTAT  
TTGGTGTTTTCAAGATTGGGATAGTTTTTCTTCCAGCTTTTCATGACTTAGGCCCTATTCAATCCGCTTATAATCCGCTCTTTTC  
AGCTTGTTTTTTTCAGCCAAAACAGTGTTTTTCTCTCACAACAAATCAGTCAACAGTGTTTTTTCAGACGGCTTATTAGCACA  
CCGAACGGGGCCTTATTTATTCTAGTAGCGTCTAAGAAGAGTGAATGCTTGGAGGGAAGCATATCTGTTGCCTAGG  
CCACTTGAGGCGGTGCATGCACTGACCTACTGGCGCTCGGGCTGAGTGCGGCAGCAAACCTGAAACTAAGTGCAGGGCCCT  
GTTGTCACTCTTCCCGCAATCTCTGCGCTGTGCTCGCGCGAGCCATCGCGGTGCGCGCACCCGTCACCTTTCGCCACCCGTC  
GCTGTCCCGGGCGCGCGCGCACACATGCTCCCGCCTCCCGCGCTGCGCTCAGTGGCTGCTGCGCGCCCAACCCA  
CTCATCATGCACAAACCGGGTTGAAAAGCCGTGCGTCTGCGCGCGCAATCATGGCATCCGGGACGACGTCTGCGGCCTC  
CATTAGGCCGTTTCAACCCACGGAAGGCAGACCTGCAGCAGCTTCAATGCTTGACTCTCTCCACTCTCCAGCAGGTGCACT  
GCAGCTCACTTCGGTCGTTTCATAGCAAGGTGCGATTGATCTCGATCGAGCTAGCGGCCGATGACAGATGCCACTGCCATGTA

>SsLRR-RLK129

&gt;SsLRR-RLK130

>SsLRR-RLK404

>SsLRR-RLK428

CCCATGACCGCTGAAACACTATCTTGCTCAAAATTAATATAATTGGTAGCTGAAATCAATGACATGTATGTCTGTCTTTTAAAC  
TATGCTTAATAGAAAATTAAACAAGTTAAACAACCGAACTAATTACACTAGGGGCAAGTTAGGTTTTTTAGTAGACTCTTTAA  
TTACTTGGTTCTAAAAATTGCTTGAGTACCTTGATTTAGGACGAAGGGAGTACTATCTCGTATAAAACAAGTTTGGTTGAGGAA

GGTTTATCGTGGGGCAATTGTAGCAGCAATGTGATGGAAATTGTTGATCCTAGAAACACATACATATGTGTATGTATGAATCAG  
CTGGCTTATCTTACCATTGTTCGTCGATATGTTGTGTGAACAATAACCTTTCTTTGGATGTTTACTTGTGCATTTCTCTATATT  
TTAGGTGCTATTTTTTTATGTTTAGGTAACGTTATTTTGTCTATTGTTGGATTATAGAGAAGAATTGTGAATGTCTCTCATGA  
CCTGTCTTTTTTAACTGTACTAGTTTATTTTGCTTGAAAACCTCAGGCATTAATAATATCGGAAACGCTCTTGTAGGGAGTCCGT  
CCGTCCGTCGGGACGGATCCTGCACTCCCCACGTTGCCCCCGCGCGTGTCTGCTTGTCTGATCACGGGACGGACCCCGTC  
CTCGCCGCGCGCTCCCGCTCGCGTCCCCCCCCCGCTCCACGCCGTGCACGGCGAGCCCGATGCTAGGCATCGTAGCTCGCT  
CACGGACTCGCGCTCCCGTTGCAAGCCATGCTCCATCCGCTTGCAGTACCGAGGTCGGTGCCACCCGACGAGTCCACACCGG  
CGACCTCCACGCCACTCCGCGACTTCGAGCTCCGTGCCGATGGCAAGCTCCACATCGATGAGCCTCCATTCTGTCACAGTAGC  
AAGCAATGCTACACTGAAAGCGTATGTTGCAATAGTATGTTTCAAATGTTTTAGATGTTTCGAGGTATGTGGCAAGTATTGTAT  
ATCGATGTTGTAAAAGTAGATCGGGATGTTGCATATGTTGTAATGGCTACTGGCTATACACGATGTTTCAAGTGTATGTTCCA  
AATGTTTCATCTTTTTAGACGAATGTTGCAAGTGTGTTGTCTGGATGTTGCAAAAGTAGATCTAGATGTTGCATATACATGCAT  
GTTGCAAGCATATGTTTCAAGTGTGTTTAGGTGTTTCATACGATGTTTGCAAGTGTTCATCTGGATGTTTCATATGTTTGCAA  
TGGTGTCAAATGTTTTAGCCGTTTTTCGCTAGTGTTCATGCTTGTGTTAAGTGTTCATTTGTCTTCTCTGTATGTTGCAAC  
TGTTGCATCTGGATGTTTCAAAAGTAGATCGGGTGTTCACATGGGATGCGCTGGGAAGCGGCCAGAGGCGCGGACGACAT  
CCGGGGCGGCATAGGACCACTACTAGTGCCTCCCTCGCGAGCCGACGCAAGTAGGCGCTCGTTCCGTCCCAAGTGCGGGCA  
CGCTCCGGACACTAGCGCCCAATCGGACGCCAGAGCGCTGGCAAAATAGGAACACCCCTTCCTTGTGTATAGTATCCATTGA  
CGCTGGAGACAACAGAACTCAGGCCATGGGTAGTTTGACAGCTGGCTTCAATGATAAGCAAAACGATTTGTGTTGACAT  
TCACGGGAACAACGTGAAATCTGCAGGGAACAACGTGAAATATGCAGGTGGGCTATCTCAAATGATTAATAACCAAAACCC  
CATCCCTTGATCTCAAGTCAAACATTTGGCGCCAAAGCTAGCTAATCCGCTGCCTTTCAGTTCCTCAACTGCAGTTAGGCGAGC  
CACCTTCCCGCCTTTTCTTCTCTTCCCTCGATCTTCTCCAGGCTCCAGCTACTACACGTCTACACCTCCGCGCGCGGCCCTG  
TTACCAATAAAACCCACGGCATTGTAGCAGACGTTGCTATCAATGGTCACCACATCCGCCTCGTTGCCACTGCCCTTTCGGGC  
ACCACC

>SsLRR-RLK171

ATATCCTTGTGTGAGTATGTTAATTTTATTTTTTATTGTTGAACAAACTGTTATTGCATTTTCGATCTTTGGTCTTAAAGTATG  
CGACAAACAAGACATCAACAACCTATTTTGACATGAAAAATATCCATGGGTCAATTTGCTCCAACATGGTCCAGAATTTACAA  
TATGGGCCCCAAATCACATATTGGGGATGAGATATTGAGGAACCTGCAAAAGCATCTCCCCCAATAACCCAAAAAGTAAATATTG  
GGCTACCCAAATACTAAGCTATTGGGGGAGTTTTATTGGGTGACTGGTGGAGATGCTCTTAGGACCTTTCAGCTGTCCAACATA  
GGCAATGCACATATCAGTGCAATTAATACTCACTAGCACATGCAACTGCAATGTCCACGTCAGCAAAATAATAAGTATTTTT  
TGTCCTACTATTATACCACGCAATCCACTAATCCGTAATTTCTGCGGCAATGCGCGAGGTATGCTTCTAGTATACCTATTTTCC  
TTGGCGTAGCATGTAACCTCACAATCACAATCGCCTCCCTTGTGTTTGTGTTTGGCGATTACCAACATGTTCTGTTTGAGC  
TATTAGCCAAATCAGCAGTCAATCAGCAGTGTGTTTCTCTCATAATAAACAGCGAACAGTACTTTCCGCCACAATAAACCA  
GCGAAACAACAGGCTGTACATCGAAGATGCACACGACACCGCAACACTACTGCTATTGTTTCATCGAGTCCCGCAGGTGTC  
TGCATTGGCCCGCCAGAAGTAGGCAGAAGCGAAGCAAGTCAATGTTTTCACCGTTCACGGCGCTCGTTGCCGGTGTGTC  
GGATAGACTTTCCCGTGCAAAATGACAATTAGTCAGTGAGTTCCTCATGCTGTAACGCTTTCTCTGATCTCTGTACTCCCATCCCTC  
TCAGTCTCAAGTACTTAACATGTATGATGGAGACGCTGTTTTTGTAGTACTTGCAGTTCAGGCTCAACCTTTAATTTCCAATGTT  
CGAACCCGTCAAATGGTTCTAATTTCTATCTTGTGTGATCGGTGCTAGTTCAGGTCAGGTCAAGTACACGATGACTTGAGTCATGCGT  
GCGTGTGGTTTGGAGTGGCCCTCGGGCTTGACTGAGCTCCCGTTTCAGTCCCATCGCTTTCACCCGGGCGGACAGTCTG  
GGAGCTGTCTCCAGTCCAGTAGCTTTCCGGCTTTCCCTTTGGGCTTCAGCCAAAGTTCGATTGATTCTGGCTCCAACAGTCAAG  
TCTTCGTGAGTCTCTGCTCACTTCATTAGTTCATTTCTCTTGGGCTCGTTAGATCCCCGACTCGGGGTGGCCAAATCTGCACA  
GTGCCACCCCGAGTACTGTAGCATTTTTGTTTTTATGGTAATAATGTCCAAATTTTGATTAATTAGGCTCAAAATATTCGTCT  
CGCAAGATACAACAAAACGTGTGAATTAGTTTTGATTTTCATCTACATTTAGTACTCCATATATATGCCGCAATTTTGATGTGAT  
GAGGAATCTTCTTTTTGCATAGTGGAATTTGGGGTGAATCTGGAATCTAAACCAGGCCTTGCTTTCTCTCTTCGGACGAC  
GACTAAACCTTTGATTTTCAGCAAAATCGTTTCATCTCTGTTAGGCCATGTTAGTTCCTCAAAATATTTCAAGATTTCATTACA  
TCAAATGTTTAGACACATGTATAGAGTATTAATAATAGATAATAAAGAAAAATAATACACAGTTTGGTAGAAACCCACGAGA  
CAAATCTTTTAAAGCCTAATTAGTTCATGATTAAACACTAATTAACAAATAACAAACAAAGTGCTACAGTAGCCAAACCCCAA  
ATATTTACAAACTAAACACACCCTTAGTTTTCTTTTGCAAGATCAGATACTCCAGCGCTCCACGGCTACGACCTTCACGAG  
C

>SsLRR-RLK360

CATACAAGGTGATATCCCTTGGTGTATGCTCTTTGCTGATGATGTGGTGCTAGTTGACGACAGTAGGGCAGGGGTTAATAGGA  
AGTTAGAACTATGGAAGCAGATGTTAGAGTCGAAAGAGTTTCAGACTTAGTAGGACTAAGACCGAGTACATGAGGTGCGATT  
TCAGCGCGACTAGGCATAGGAGGGAGACGTTAGCCTCGATGGGCAAGTGGTGGCCAAGAAGGATCACTTTCCGTTATTAG  
GGTCGATGCTACAAAAGGATGGAGACATTGATGAAGATGTTAGGCATAGAATTTAGCCGGCTGGTTGAAATGGTGTCAAGC  
TTCTGGCGTCTCTGTGACAAAAGGTTGCCGAGAAAGCTAAAAGGTAAGTTCTATATGGCGGCGATTTCGTCCGACGATGTTA  
TATGGTGCTGAGTGTGGCCCTACAAAAGGCGACATGTCAGCAATGAGTGTAGCTGAGATGCGTATGTTGCGTTGGTGT  
ATGGGACACAAAGGATAGAGTCCGGAACGACGATATTTCGGATAGGGTTGGGGTGGCAACAAATGAGGAGAAATGTA  
TTCAACATCTGTTGAGATGGTTTGGATATGTCCAACGGAGGCCTCTGAGGCGCCGGTGCCTAGTGGAGTTCTAAAGCGGGC  
CGATAATGTAAAGAGTGGTAGAGGTGCGACCTAAACTAATTTGGGACGAGTCCGTTAAGAGAGATCTTAAGGAGTGGAAATATC  
TCCAAGGATTTAGCTATGGATAGGAGCGCTTGGAGATTGGCAATCAACGTGCTTGAACCGTGACCTATTTTGTCTTGTGCC  
TTTATATCTTTTATGTGCTCCCTGTTTCTGCTCTCTTTGGGTTTATCTCAAGCCCTACCCAAACTTGTGTGGGACAAAAG  
ACTATGTTGTTGTTGTGCTACTGCTATCACGTTTGACGAAGTGTCTTTGGTAGAGATATGCTACTACTACTACCCCATGAGC  
ATTTCTTTCAGAATCAGGACTGTATGTTGAATTATCATATGGGCTTTGTTGTGGTACACCCAAATGACTGTGAGCCATTCATTTA  
ATTAGATCTGATGGTTGAAATCATCTATTACTTTCTATGAGGTAAATAGGTGAAATAAAGAAAGTTTTAGATGCAAAAGATCCCTTG  
TTAATCTAATTGATGCACACATGATCTATTAGATATGGTGAATCTTTTTATTTTGAAACTTTGAATACAACATAACTTAATTAG  
AATAAACTAACAATTTTTTGATGCACTGTAACTCAGGCACGCAACCAGATTTAAATGTTGTGTGATGTGCACACTCGATT  
ATGTACCGTGTGTTGTTGTAACATGTACTAAATTGCTAAAGTCCACAGCTCGATTAACTGCTAGATGTCGATATTTTTCATGT  
ATGTAACATATGTTTTGTTGAGGATGAAACGTGACCAAGTGACCTTTTAAACATAACTTAATATTATAAAAAAATTAACCA  
CTTCTAAGACAAAAAAGGTATTATGCAGAAGGAAGAATACAACGACAGTCATGAAAGAAAGAATACGGCTATGAACAAGGA  
AGCGGTTGCGTGCCCAACCATCTCCCGTGATTAGAGGGATTTGAGGATATTTTTATTTTTCTAGATTTATTAATTCATTTAA  
AATCTAAAAAAATCAATACTCAGATTTATTTAAGATATTACTTTGTAGCAAAATAATGGGTGTACCGCTACTTATGCCCTTATCAT  
ATAGCATCGTGTGGGTACGCGGGCGCAATACAAGCTGCCAGATGGCCACTTGTTATTGACAAATACAGCAGGCGGGTTCGTA  
GCTTGTTCCTGTCCACACTCCACACTCGTACACCTTTGTTCTACTATGAAATTCGGTGGGGAAGATTAGCAGGAGCAGCTC  
CATCCATGGCTACCAACCATGCATTTCAATCGTCTACTACTAGCTCTATCAGCCCCGTAGCTTCATCATCTCTTATTCGGAT  
CAACAGCA

>SsLRR-RLK390

AGTGACTTTCCAATTAATAATAGGACTGCATCAGGGGTGACGCTTTGAGCCCTTATTTATTTGCTTTGGTGATGGATGAGGTCAC  
AAGGGACATACAAGGTGATATCCCTTGGTGTATGCTCTTTGCTGATGATGGTGCTAGTTGACGACAGTAGGGCAGGGGTT  
AATAGGAAGTTAGAACTATGGAAGCACATGTTAGAGTCGAAAGAGTTTCAGACTTAGTAGGACTAAGACCGAGTACATGAGG  
TGCGATTTTCAGCGCGACTAGGCATGAGGAGAGAGACGTTAGCCTCGATGGGCAAGTGGTGGCCAAGAAGGATACCTTTTCGG  
TATTTAGGGTTCATGCTACAAAAGGATGGAGACATTGATGAAGATGTTAGGCATAGAATTTAGCCGGCTGGTTGAAATGGC

GTCAAGCTTCTGGCGTCTCTGTGACAAAAGGGTGCCGCAAGAGCTAAAAGGTAAGTTCTATATGACGGCGATTTCGTCCTCA  
CGATGTTATACGGTGCTGAGTGTGGCCTATAAAAAAGACGACATGTCACGCAATTGAGTGTAGCTGAGATGCGTATGTTGCGT  
TGGTGTTATGGGACACAAAGAGGGATAGAGTCCGTAACGACGATATTCCGGATAGGGTTGGGGTGGCCAACTTGGAGG  
AAATTGATTCAACATCTGTTGAGATGGTTTGGACATGTCCAACGGAGGCCTCCTGAGGCGTCGGTGCGTAGTGGAGTTCTAA  
AGCGGGCCGATAATGTAAGAGTGGTAGAGGTCGACCTAACTAAGTGGGACGAGTCCGTTAAGAGAGATCTTAAGGAGT  
GGAATATCTCCAAGGAGTTAGCTATGGATAGGAGCGCTTGGAGATTGGCAATCAACGTGCTGAACCATGACCTATTTTGTG  
TTGTGCCCTTTATATCCCTTTTATGTGTCTCCCTGTTTCTCGTCTCTTTTGGATTTCATCTCTAGCCTACCCAACTTGCTGGG  
ACAAAAGACTATGTTGTTGTTGTTGCTACTGCTATCACGTTTGACGAAGTGTCTTTGGTAGAGATGTCACTACTCACTACC  
CCATGAGCATTTCTTCAGAATCACGACTGTATGTTGAATTATCATATGGGCTTTGTTGTGGTACACCCAAATGACTGTGAGCC  
GTTTCATTTAATTAGATCTGATGGTTGAAATCATCTATTACTTTCTATGAGGTAATAGGTGAAATAAAGAAAGTTTTAGATGCAA  
AGATCCTTGTTTAATCTAATTGATGCACACATGATCTATTAGATATGGTGAATCTTTTATTTTGAACCTTTGAATACAACATAA  
CTTAATTAGAATAAACTAACAAATTTTGTATGCACTTGTAACTCAGGCACGCAACCAGATTTAAATGTTTGTGTATGTGCAC  
ACTCGATTATGTACCGTGTGTTTGTAACTGTGTAACCTGCTAAAGTCCACAGCTCGATTAACTGCTAGATGTGATGATGAT  
TTTCATGTATGTAACATATGTTTGTAGTTGAGGATGAAACGTGACCAAGTGTACCTTTTAAACATAAATTAATATATAAAAAA  
TTGACCACTTCTAAGACAAAAAATATTATGCAGAAGGAAGAATACAACGACAGTCATGAAAGGAAGAATACGGCCATGAA  
CAAGGAAGCGGTTGTGTGCCACCCACATCTCCCGTATTAGAGGGATTGAGGATATTTTTTATTTTCTAGATTTATTAAT  
TCATTTAAATCTAAAAAATTAATAGCTCAGATTTTAAAGATATATCTTTGTAGCAAATAAGGTGTAACCTAACATGCTGCC  
CTTATCATATAGCATCGTGTGGGTACGCGGGCGCAATACAAGCTGCCAGATGGCCACTTGTATTGACAAATACAGCAGGCG  
GGTCGTAGCTTGTTCCTTGTCCACACTCCACACTCGTACACCTTTGTTCCTACTATGAAATCCGTTGAAGATTAGCAGGAGC  
AGCTCCATCCA

>SsLRR-RLK371

TAGACGCTTTATGGCTTTGCACTAGTTTTTAGTGACCAATTGTGTTATAAGTTTLAGAGTTTLAGTCAATTTACAGGATCATAA  
TAAACTTTAAAAATTTATTCATACCAGAGTATGCAGGTTTCATACAGCTCTATAAATGTACGTAAAGCCTGCGGCCCGGCAGCC  
AAAGCCCGCTTTTGTGCTAGCAGACGACGACGACGACGATGGTGTGCAGGCTTAGAACACGCTTCCGCTAGCTAG  
TGCTATGCTTGGACTGCTTCTAGGACGACGACGACGATGGCATGAACAGTTAAATAGCCTCGGTCCGGTACTAAGCCCGC  
TAATAGCCTAATAGGCCAACATCCCTACAGCCTAACACCTTAACTCCCAACGCTAACCGGTCCCAATTCACCCACTTGGCCAT  
TTCCGATTTCCACCCGACCCACCTCCCACTCGTGAGTCGAGTTTCCACCCGCTGAGATGTAGATGGATGAGTGGGGTGACG  
TGCATCGGAGGTGCAAAAGCATCGATGTGTCTCTCATCTTCTTGTACTAGATTATACTATCCGTTCTAAATTAAGACATT  
GTCTCAGGCCACAAAGGTTAGCCTCAAGCACCGAGCATGGGGGCGAGCGGACACTACACTGGCCACGAAGGCACCGA  
CCTTGAGCACACGCCGACCGCCTCTCCCACTCCTGCTGGCTGCCTCTCCCGGCACCTGCCTCGAGCACCTCCCTTGGTTTC  
ACAGTTTCGGGACGAGGCAATGAAGCGCGAAGACGTGGGTCTCGGGTTGGCTGACCTACTACAAAACCATGCTTATT  
GGGCCAGCCTGGCTCGAAAATCAGCTCAGTGTGCCATGCCTGGGCCGATGGCCAGTTGGCGCGAAGCCCTTTTTGGCATGG  
CCCGATGGCCTGACATGCCATAGCCGGCCTAGCCTTATCGGGCCGTGCTTTTATTGGACCCGTACCGGGCCGTGTCCGTTTGG  
CCATCTATATACCCTCCACATGTAGACGATACATAATTATAACTAGCTCCATGAGGCATATCCCACTTGCGGAATTTAGCCGAT  
TAGATCAGGAGGTGCAAAAGCATCGATGTGTCTCTCATCTTCTTGTACTAGATTATACTATCCGTTCTAAATTAAGACATT  
TTGGCTTTCTAGATATGTAGTTTTTCTATATACTTAGATATACACTATGTCTACATATGTAACGTCTTATATTTTGAATTAAGAG  
AGTATATAGAAATTTTGGAAAATGGTACAGCTGAACAAGATGTGCGTATGTAGGACGCTCAAAGTCGGTTGACTGAAAT  
CCCTTTTCGGTAAGTAAATGAAACTTTCAAATTTCAATCATCTACCACCTTCCCAAATGCCAATTAATTTCCACTACT  
AGCATCTAGTGCACGATGGGTACAAACGTAACCTGTTGATCGAATATGGTTTCAGACTTTTCAGTGAGGTGTGAGGAGTTCAIT  
TCTTTCTGAAATGACGTGAGAACTTTATCTCCAATATCTTGGTATAGTGCCATTCTCTGTTAAGAACGACGTATAGAAATATGA  
AGTAAACGAAATCAATCACAGCGGAGACACAGATTTACGTGGAACCCCTTTCAATGCGAAGGGGAAAAAACACGGGCA  
CTAGCTGGCAACAATCTCACTATCTCAAGAGTTTGGGGTTACACGCTGCGGCGGCTTACAAGAGAATCAATCTCCACGAA  
ACCGGCCCAAGCCTTCGGCGACGGGCTCCGCTTCGCTTCGTGAGAACCCCGCTATATCTTGCAAGTGAATTTGGAACAAC  
TCCAACAATTCACATATCAAACATGGAACCTTGCCACTTGTAGTCCAACTCCGTGTTTGTCTGCGTTGCGACAACCTAAGGT  
GACCAAGTGGTCAAGGCTTGGATGTGTTATGTTACTTAAAACTCCGATTGCTTGCAAACCTCTTGTGCCAGTGCCTACAC  
TACTGCAACCCCAACA

>SsLRR-RLK392

GTACTGCTCCTCCCTCTGCAGCTTGCCAGTGAGGTCATGTTTAGATAGCAAAGTTTGGGAACAAAGTCTGCATAGTAAATATC  
ACGTCATATGTAGCAATTTTGTGTTTATTTGATAATAATTGTCCAAATATTGATTAATTAGGCTTAAATGTTTCGTCTCGCAAA  
GTACAACAAAAGTGTATAATTAGATTTTATTTTCATCTATATTAGTACTCCATATATATACCGGCATTTAATGTGATGGAGAAT  
AGAAATTTCTGCATAGTGAATTTGGTGGTCAAAATTTGGGTATCTAAACAAAGGCCTGAATGTCTCCATCCCATGTGAAACAGC  
AGGAGCCACATAGTGGGAGGAACTCGGCACCTCTTTATTAACACACTTGTGTGTTTCTTTCTTTGTCGCGCAAA  
GTATTCTCAGCCTGTTTAGTTTGAAGAAAGCAAACTCAAAAGTGTACAGTACCTGTACATCAAATCTTACAGCATATGCAT  
AGAGTACTAAATATAGACGAAAGAAAAAACTAATTATACAGTTTGGTTGTAAATCACGAGACAAATCTTTGAGGCTAATTA  
TCCATGATTGAACACAAATTTGCCAAATAAAAAAGTGCTACAGTAGCCGAACCTAAACTTTTTCTCAACGAAATAAGC  
CCTCTAGGCTATATTAGAGACCCTCTGGCCACTCTCTCCCTAGCCGCTCCGTGTATCGTACATCAAGATAAGAGGG  
CGTTCTCAATGGCAACTCGCAAATCGTTAGCTAGATGAGACTTGGAACAATAAAAAAGACACAGTGGTGGAGGGTTATG  
CAGGCTGTGAGAGAGTTGTTTCAAAAAATCATACGAGATTAGCTATTATAGAGTCACTAGCTCTAATCTCTCTCCTCAATAAC  
CAATAGAAATTTTCTAGACTAGCTATTTGGTAACCGTTGGGAATAAATAAAGTTGCAACGACGAGTACAACAGAATATGAC  
AGTTGCCGACCCACCTCCAGCTCCAGCAACTACATGCTACAGTTGCGGCTCCGTTATCTCTTACAGATGACGGTTGAA  
GAGCGTGGCGAGGACGTAGATGGCCACAGCATCGCGCCAAGGTACGCGAGCCACGTTATGGATCTGACCCACCCAGGAAC  
TGCAACCCACACAACAAGGTACAACCTCGATCAGTCATCCCCATCCTTGTCTCAATCCACACCGGTAGATGTGGTGTCCAAT  
TTTTTAGCAGCTGAGCAGAAAAACACTTGTTTTTCAAATGAAACCGGCTCATCTGAATGCTGAGTACATCCCGTATCGCAA  
GAAAAAATTGACTACTATACAATAACAAGGATAGAAAAAAAAGATCTTATTGTGCGCATATCATCTGAACCTGAATGTAGTATCA  
TTTTATCTTATCTAGTAAATAAAATTTGAACACGGATAACCATGGCTCATGCTTCCAGCCTGGTCAITTTCTGATTTTTGCCT  
ACAACGTGGTTGTTTACTGTTTCTATCTTAGCTTACAGTAGAAAGCTGTTGACTGTGTGCAGCCACAGCCAAAAGTAGC  
TAGTAAATTTCAATAAGCAGATAAGCTAGTAAACTTCAGCACGTTTAAATACAAGATAAGCTGTTGACTTGTGTTAACTGTTGATT  
GTTGAAGGAGCACAGAGCACTTGTCTCAGGAGAACACCCCAAGTTGTACAGTTTTTTTTTCTAACACAAAAATAAGTGT  
TGCATAAAACCTTTTGTCTTGTCTTTGAAAAAGAAAAATACAATGCACACTCTCGTCCGCTGTGACACGGCGCCTACGTGCTTAT  
CAGCATACTTCGGCAACCGCTAGCATATTAGGCTGTGATGAATAAATGGAGTGTAGTACTGCTTACCGCTGATGCCATA  
TTGCCATTGCGAAGGACAACGAAAGCAATATTTATATGTAGTACGTATGCCTTGATCTTGTATATATCACTTCATTTTCAACT  
CCGGCCAGCA

>SsLRR-RLK328

TCTAGGATTTATTTTTTATAGCGTGTCTTGTGAGAATTAACGTGGTGCCTCCGTTGGGGCCTGTAATTAGTAATAGATAGTA  
AGACGTTAAGAGACATCTATTAGTGTATATAATGTTAATAATATCTTTATGAAACTGACCAAACTTGAATAGATTTCAITTC  
GCCAAAGACGGAGACGAGGGAGGAAGAGTGTCTCGGATGGGTACCGGGCGCAGGTGCGGGTGGCGTCACTATCGCAGGC  
CGACTGGAGGGGAGGGGAGTTCGGACGGAGCATTTGGGTCCAAACGATCGGACCCGATGATTTTCAAGAAAGACATTA  
TGTGACCAGTATCCATTGCATGCACACATCAGTGCAGTGTGGCACGTTTGGCGACACAATTAACAGGGCAGGCTGGCTCCT  
AGTGTCCAACACAATTAACCAAGTCGGCCAATATACAAGGCCGAGTAAAAAATATTGAAATGATGGTACGTATGTGGAGG  
ACACATGCACATAGTGGCCAAATTCGACGTTCTGTTGGAAGCTCCCTAAAGGATCCAGTTTCTGATAAGTAAGCTTATAACA

CATGCAGAGTCGTATCCGATGCATGATGCATGATGGTTGACTTTTCATTAGTTTTTGCACCATGAATTACAGATCAATTAATCT  
GGTTCAATCATTTCATGAACGACAGGAACAGATTGTTCTTATTGGATCCTAGCCGCCACTGCACGTGTGGTGCACGTGGG  
CGGGGACTGCTGTTATTACGACTCATGTACTCCCTCCGTATTGGATTTACAAGTCGTTTTAGACAAAAGTTGGGTAAACAT  
TGGGAATATAAATCATCAATAACTTTTAAAGTTGTTGAGTTTGCAAATGTAAAAATTATATGAATAGATTGTCTTGAAAAATAC  
TTTCATAAAAGTATACATATATCACTTTTTCACAAATATTTTTTATAAAAAATAAGAGGTCAAAGTTATGTTTTGGAGACCGTGT  
CGCTGTCTTAAACGACTTCTAAATCCGATATATATATATATATGTATATATATATATATATATATATATATATATATATATAT  
ATATATATATATATATATATATATATATATATATATATATATATATATATATATATATATATATATATATATATATATATAT  
ATATACTAATTTACGACAATGTCAGTATATATTACGATAGTTGAATGACTATAACACATGGGGATATTTACTATAATGTTATAGT  
AAATCACATAGTAAGGAGTTACTATAATTTGTAAATTAACATAACAATTATCGTAACTCAAAGTGGCTACAGAATAAGTTATT  
TTATAGCCAGCTATAAGTTAATAGTTCTATATATATATATATATATATATATATATATATATATATATATATATATATATATATA  
TATATATTACTCTACAGCTGACTACAAAATAACTTATTCTGTAGTCACTTTGAGTTACGATAATTGCTATGCTAATTTACGAGAT  
TATAGTAACTCCTTACTAAGTGGTTTACTACAACGTTACGGTAAATATCCCTACGTGTTATAGTAATTCAACTATCGTAAATATG  
TATTGACATTTGTCGTAAATTAGTATATAAAATTATCGTAAATGGTGGTGGCTACAGAATAACTTATTCTGTAGCTAGCTATAGAG  
TATATCTCCCTATATATATATATATATATATATATATATATATATATATATATATATATATATATATATATATATATATATAT  
CACCACAACAGGGCAGACTCGGATCCGATGGCCATTCTAATAGTATTGGCCATCTACATGCACAGGAACAGGTTGTTCTTATT  
TGGATCCTAGCCGCCACTACATGCATACAGCGGTGCAGCATGTGTGGTCACGTGGGCGGCGGGCTGCAGTTATTACTACCCA  
TGCACATATATATCAAAATTAACCAACAGGTCGGGCAGACTCGGATCTGA

>SsLRR-RLK345

CTGGGACCCCCTACTGGACGACCCGCGCACCAACACCTCCTCCTCCTCGTCGTCGTCGGCGGTCTCCTGCGGGGGGAC  
CTGGTACGCCGAGCGTACTGCTCGATGCGGCCGCTGCCGCCGTCGCCCTGGCATTGTCGAGTGCCTGCAATGACAAAAGA  
ACAAAACTGTTAGCATAAAATAAATGACAAAGTACTGTAAAGGACATAATAATAACAATATAGTATTACATGGCCCTGTAATTA  
TCTCCGCGAATGGCAATATCTCGGGCGTGGAGTCGTATCTTATCACTATCGTCGTCATCGCTATCAATATGTCGAGCTCCC  
TTAAGTCATCACTGTCATCATCTCCTCATCGTCTCCATAGTCATCATGTACCTCCTCCTGGACAACCTCCATCGCGCTGCA  
TCTGCCATCGTCAAGTCTTAAAGTCCCTGGCATCTGCATCCTCACCCTCGTCTCATCGATTGCTTACTTCCCA  
TGCCCATGAGCGAACCAATGTCGATCTCCAAGGTACCTTCGAGCCCCCAGGTTGATAGAACTCATCGGTGCTTGGGTCAAA  
GTTGTAATCGTCGTCATTTGGGAGAGGGCGCTTTGCCGCGCGACGACACCAAATGCACAAGGCTCCATCCCGCAAGCTTCTTG  
TCTTTTTGGCAGCCCCATGGGAGGTAATAAACTTGCGTGGCGTCTCGGTTGGCCACAATGTAGACATCGTCTCCTTTATAGCT  
GGAGTCTGTCGAATCTCGACTTGACCTATCTAAGGCTTTCTCGTGATATCAGGATCAAACCAATGTCGATTGCTACTTCCA  
CCGGCGCTAAAGTCCCGGCACCCTTAAAGTTGAGCTCGTATATCTCTTCGACTATGCCGTAGTAGTCTTCCCATCCGTGCCG  
GGCGTACGAACTCCGCAGACATGGTTTTAGGTTGGGTGCGCTCTCCTCGTAGCTTCTCGTGCAGAAAGCGATAGCCATTCA  
CATCATAAACGGTGAATGACTTCACCCTACGGGAGAAGCCACGGCCACCTGTTTCAATTCATCGCTCATTTCTGCATCCGTT  
CGGGCTGCAAGGTTAGGAGATCGTTACATAACCTGGACATCTCCACATGTGATAACAAGTTAGCCACCCGACGTTAGTCCA  
GGTTTTAGCCACCCGACGTCGCCACTTGCTCGAAACTTTCTCAAATTTTACCATAGCCTCCGATGCGATGGCAAGACACGT  
CGTCAAGTTTCGTCAATTTCCGACTCCGTTTCGATTTTATAAAATTTAAAAACACTTTTCACGCGCGTGCCTCGGCGTGTTC  
GACAAACAAGGTGCAAAATTTACGCGAGGGCCCGCACACGCGCTCAACATGCTCCAACATCATGAATATCATTTTCTAA  
ATCGCCGATTCCATTATTTTCATGTACCTGCAGTTCAAATCTAGAGCTGCCGAAAAAATCAAAGAAACAGCAAAAAATCAAT  
GGAATATAGCAAAAAATAAATAAAATGACCCCAAACTTGAATATATCATGTACTTACTGTAGCAAGGCAACACAAAAAACT  
GGGATCAAAAATCGAAAAAATAATTCTTTGCCGATGCCATCAGTGGCAGTTGGCAAAAGAGCCTTTGCCGATGCCA  
GGGAGGATGGCAGTCGGCAAAGCCTGCAACTTTGCCGACTGCTGACGGAGTGGCAGTCGGCAAAGGTGACGGTGTGGATG  
GCGTCAACCATGGCCTGCCTTTGCCAACTGCAATTTCTTGCCAACTGCCTGGCAGTCGGCAAAGCCAGGCAGTCGGCAAAT  
CCTGCTTTGCCGACTGCAGGAAATTCAGTTGGCAAAGGACCTCTTTGCCGAGTGTGCAAAAAAACAGTTGACAAAAGA  
AAATTGCAGTCGGCAAAGAGCCAGTTTCTCTGTAGTGGCTGTGCTGTCGCCAGATGTTGTCTGCAAGGGGTGCTCAGCCCA  
CACCTCGGTAATCTTTCTGTTCTCTCC

>SsLRR-RLK122

TGACTGGAACCATGTATGATGAACCACCATGTCCTTTTGATCAATAGGCACAAATGGATGGTAGTAGTGTAATCCCTGTAA  
GCCTCTTCTATCTACACAGCATACTCTGTTACAGACTTTGTGCCTTGCTTCAAGTGCAACAACCTCATGCATAATACGAACAGCT  
TGCATCTTGTTTGATTGCTGCAAAATTGACTCTCTAGAGCACCCCATACTTCAGCAACTGTGGCCATTGTCTCAACTTGTCT  
CGGACTATTGGTTCCATACTACTCAACATCCACACAAGCACTCTGTCAATATCTGTTTAGTCTGAGCATCCATCTCCGCCCTTA  
CTGTCAACCTTCATTTTAAACCAACAGATTCTCGTAGCCATGAGAGCTCAGTATTAAACGAGCATGACGAGCCAGCTCATGTA  
GTTTTCTGGTCCCATCAGTTTAATCGGATTAGACTCAAGAGCATACTTATAAGTCTCTAGAATCACTTTATGCTGCTCCATCATT  
TTACTAAGAATCTTACACAGTTCTCCAATGTAGAATCAACCTCTTTTCTCACTGCTCCCCATACTTCAAAGGGATACGGC  
AATGGCAATGGAGAAATAGAAAGAAATAGCTACAGCTCCAGCAAGTTACTCCAGATTCCAGACGGAACAACAGCAGCCCC  
GGCCACCTGAGTGCCAGTCAAGTAGAAGGGTCACGTACCAACAAAGTAGCAGTAGCAGCCCCCTAATCCACGGCCAAAGCCT  
TTAATCACTGCTGCCACAAAGCAACACACCGCTTGGCGGTGAGCTCAAGCTGCAGAAGCACAAGACGACCACAGTACAG  
GAATCAAATCCGCGGCAACGGCGCGAATCTCAGTAATCAACCAATCAAACGGATTAGGATCCACAGGATTGACCTGCTCTGA  
TACCATATTGTGAATTATTTGGTGGATTAAAGAGGGATTGAAGAGAGTACGCCATGAACAGAGCAAAATGGGAAAGAGTCTG  
GATCGATCCTTTCTCGATCCTTCTCTGCCTCTATTATATTTTTGTACATTTACAAATTAGTCCCCATACTATAATATATTGAGGA  
CTAAGTACACCTACAGTTCGCATCTGTTATGTTGTAGCCACACGTCGTGATTTTTGTAGAGTTGGGTGTACCTGCCTTAG  
CAGGTTTGGTGAAATCTTTCAAAGAAGTTGCAAGTTTCAAATTTCTTTTCAATGAATAGGTGAAAGGAAACAAAGCAGGA  
ATGGTGTGCAAGTTAGTTTCTATTGGTCATGTGCTATTATAACCAATCTCAAACAGGACCTAGTCTTAGCTATTGCTATTCCT  
TCCTTGCAAGTAGGAAAACGTAATACTCTTTTGGTTATTCCATACTTAAAGAGGGGAAAAAATCACTGCTGGCCTGCAGGCTGCA  
ACTAATTTTCTGTTTCATGAGAGAGCGCAATAACAAATATTGTAGTTTATTATATTTCAATGTCTTAATTAGGTTGCATCTG  
CTGATAGTACTCTTATCAAGGATATGCAATTACTTCAAGAGTGGAATCTAGGTGAGCAGTTGAGAAGGACCTGAGCAAAA  
CATCATTGTCTTTGGCTTGCCATGTTAACTCTCTGAATGACACCAGTTCTACATCTCCTGAAAGCTACACTAGGAATAAGCAA  
ACTTGGAACAAGTAACCTAGCTCTAGTCGAATTCTCAGATTAGTTTTCTGGTCCCATCAGTTTAATCGGATTAGACTCAAGA  
GCATACTTATAAGTCTCTAGAATCACTTTATGCTGCTCCATCTTACTAAGAATCTTACACAGTTCTCCAATGCTAGAATCAA  
CCTCCTTTCTCCACTGCTCCCCACTCTCAAAGGGATACGGCAATGGCAATGGAGAAATAGAAAGAAAAATAGTACAGCCT  
CCAGAAAGTTACTCCAGATTCCAGACGGAACAACAGCAGCCCGGCCACCTCGCACAAAGCCCTCAAACACATAGTTGAATA  
GCGAGCAACTA

>SsLRR-RLK251

TTGATTGACATAAGCAAAAGGTTAAATACTTGAAGTTTLAGAACAAAAATATTGTCTCGGTATGTTGGATGAGCTAGGGCTA  
GTTACTAGTTGGTTTAAAAATTAGTTCAAATTAGTTAAAGTTATCTAGCTAGTTGATTAAAGCTAGTTGAAGGCTTGGCTAAA  
ATATTTTTCTATCTACTAGTCTCCTATTTAGACACACTAAGGCTAATTTTAGCTAGCTAGCAGCCTAGCAATTAGCTTTTGGCC  
CTGTTTAGTTCCACGAAAAAAACACTATGCGAAAAAAAGATTCCTGTGCATCAAACTTGCGATACATACATGAAATGACTA  
AATGTAGATGAAATCAAAACTAATTGTACAGCTTGGTTGTAAGTGGCGAGACGAACGTTTTGAACCTAATTAGTCAACAGT  
TGGACACTATTTACCAATAAAGCCAAAACGCTGCTACAGTATTTTTTTTACACCTTTTTTACACATCTAAACACAGCCTTTGTAT  
CAACACGCTAATTTCAAAAAATAAAATAGTTTATTGTAGATCTTAAAAAAATATAAAAAACCGTTTCAAAAAAATAGTACATA  
CCCATATTTTAGAAAAAGACAATACTGTAAACAATTGTCTCCGGTGCCGAGTGCCGCTGCCGCACAGCCGAGCCGCGCGG  
CGGCCACCCACTCTAGCAAGATTGCGGAGACGGTGACGACATCGGATGCGGCGGCGTACGGCGGCCTCGGGCACTTCTGCG  
GCGTCGAGAAGCTGCGGCGCTGCGGAGCGGGAGTGCGGGGTTACCATTCGCGGGGCTCGCCGTCCGGGGCTCCGGGCAGC



CGGCGAGAGCCACCAGCGACCGTGAGCGACGCGACCTGACTTACCTGAGGTGTGTTCTTCCCCGCACGTTCCATCCTCAT  
TTGGGATCTGACGTTCTGCTCGTGGTTGCGAGTCACTGTCATCGTCTACCCGGACGGCGTCCCGCCATGTTCCCGTTCCCG  
GAATCGGAATGAAGTGGGCACGTTCCCGTTCCCGGCTGCTAAAGCGCCCATTTGCCTTCCCGACCTCCCGTCCCGACGCA  
AGGACGGCAGCGGCTTGCTGCCTGCCTGCCTGGAAGGGCGGCGGCCAGCAAGGGCGGCGGCGGCGGCTTGCTGCCTGCCT  
GCCTGCCTGCTTGGTACGGGATATTCTTTCTTATGCTTATATAAAGCACCATTGTCTCTATAGTCAACGTCCTCTTTGGCTGTCT  
CGTAGCAACTGCTGCCTTAACCTCTATATAAGCACCATTGTCTATACGTCCGGGTGCCTATCTAATAAAGGCTTGCTGTCTGC  
AAACATTATACAATAAATTACTATGGTGATGCTCCTCATCAAGCCTCTCTTAAGCATGCTCGCCTTCTTCTCATTTGGCTTGG  
CACATTGCGACGACAGACCTCACTGGCAGCTCATGGAGCAATCGCCCTCACACCCCAACTCCGACCAGCTCGCGCTCAT  
GTCATTCAAGTCGCTCGTGAGGAGTGACCCATCGGGAGCCCTAGCTTCTGTTGGGGAACATGTCCATTTCCCATGTGCCGGTGG  
CGCGCGTGGCGTGCGGCTTGAGGGGACATCGCCGGGGCCATGTGGTGGCTCTGGACCTCCCGTGCTCAACCTGACTGGC  
ACCATCACCTGCGCTGGGAAACCTCACTTACTTGAGGCGACTCAATCTTTCATCGAATGGCTTCCAAGGGATCCTGCCTCC  
AGAGCTCGGTAACATCCATGACCTTGAGACTCTACAACTTACCGACAACCTCATCTCTGGTCAGATTCCACCGTCACTTTCA  
AACTGTAGCCACCTGAAAGAGATTTCCCTTGACGACAACAATTTACATGGGGGAGTACCCATTGAGTTAGGCTCGTTGCGTA  
ATCTGCAGATACTCAGTCTTGGCAAAAATAGACTTACAGGAGGAATCCCTCCCACCATCGCAAGCCTTGTAATCTGAAGAA  
ACTATTCTTAAGATATAACAACA

>SsLRR-RLK217

GCATTGCTCTCTAGTAGTAGCATTGTTTCATCTTGTAGTACTCTATCATATCAAGAATCATCTTTGTTATGCAATGTTTCATCTTATT  
CATGCTAATTTGGTTATTCTAGTACATTGTTCTTATATGTTCTTATGATCATATGTTCTACTAGAAATGTGCCCTACCATGATCTT  
GTTTATGCTAGTCTTTCATTCTAGCATGAACCTTGCTCATGTTCTGTTTCATCGTTTGTATGCTAGTATGATTATGTTTCATCGTTCAA  
GAGCTAGTTTGTATCCCATTAGTATTTTGGTTACAAAGTCTATATGATTAACCTTATGCAAAATGCATAGTTAGGGCTTTGATCCACA  
CTACAGTGTGGTTTGTGAGCCTCTATTTTGTCTTGTCTTCTTCTGGGAGAGTAAGAGTAGTGTCTACTAGTTAAAGTTAGTGG  
TACTTATACTAGTGTACACCGTCAAATGCGTGCATAATCCATAGGTTGTAGGGGTGGGTGGCAGGTGGTGAATCCATGTCCGG  
TCCTTTGTAATCCCCCACATTGCTTATGGCGTAGGCGCTTGGTAGTAAGAATTTATCCCTGGGATACATAAAACTAGTACC  
TGAAAGGGTAACTGATGTTTACCGCCTATAAATATGGAGTAACTCGTGAATCATATAACACCCAGTTGTTTGTCCACGAATTAAGTTGG  
GTTTGGGCTCTAGCATGACAAGTGCTCTGTGCCGACAGGATTTTGGCCGAGTGCTCTGTGCCAAGTGTTACACTCGGTAAAG  
ACTTTTCCGAGTGATTCAGGCTTTTGGCGAGTGTAACAGGCACTCGGCAAAAGCGACGAGCTCCCGCAGTGTTTCACAGGA  
AGCTGACTTCTGGAATTCATGACGAGATGCATATTCGAGTATCTAGGCTGCTATGGCACAACCCGACAGCAATGACCAAGT  
TGAAAGGGTAACTGATGTTTGCATGGCCTCAAACTGATGTAATCATATAAACAGATTAGCGCTGTTTGTCCAGTAATTAAGTTGG  
AAGAACTACCCGAGTCTTGTGGAGTCTTTTATAGATCAACTACTTTCATGCCATTCTTCTAGCCTACAGTGGCGACGCAGT  
CCCGCCGACCGATCTCGACTTTGGGTCCCCCAAGTATGGGTCTATAACGAAGAGACGGACGCACATAAGGATGGAATAAT  
GGAAATGGATATTCGAATTATCCGATATCTGTATCCGCTGAAGCCTGTAATATGGATATCCGATTTCGTATCCGCTTTAATGTG  
GTAACATCATGGATATATCCGAATTCGTTTTTTTGTAGTGTTTTCTCTAACCGATTTTCAGATCTGTATTGACAATATCCGGCAGT  
ATCCGTATCCACAGAGAAAAACAAGGTATCATGAACCTATTTAAAAAGTTTCTCTTCATAACGAGTAACCCGTTATTTAATTTTA  
TTGTTACTAATGATGCATTGGAACCATTTAATAGTATATCTATAAACTTTTAAATTTCTTTAATATGATCAGCAAGCACCAG  
CAACAACTACCAAAGTACTAAATCTTTCCAAATATAAGATGTTTACCTTTTCTAGATATATTGATTTATATGATCTAGAC  
ATAATATATATCTATATGCATAACAAATGCAACTTATCTACAAAAAGCTAAAAACGTCTTGTGTAATGGAGGGAGTACCACC  
GGAAAAATATCTCTCTCAGCTCCATTTTATTTAGCATAACGTTGGATCTAATCTGAGCCACGCACCTTAGAAAAAGTAACA  
TAATTGTGATTTTATTCACACCGTGCGCAAGGCAATGGTATGGACACATTGCGAGCATTTTCCGCTGTCTGGACTCAGACTG  
CCGAGTGCCGACGCGCCTCAGCCCCACTAGTCACTAGAAAGTCCACCTAACCTTTCATCCCATTTGGATGCTGACCTGTTGACA  
TGCTCGAAAAAGAAGACCAGTGACTTGAAAGCCCCGAATCAAGCATGAGTCCATAAGCTACGACTACGAGGCT

>SsLRR-RLK219

TTTGTGGTATTATAGATGTTAATATACTTTTTCTAAAACTTATTAGTCAAACTAACAAAGTTTGACTTAAAAATAAACTG  
AAGTAACTATAATTTAAAGCGGAGTGAGTATTTATGAAATCAGACCTGGAGCAGCATATCCAATGGTTCCCTTCTTGTAAAC  
CCAACCGCTTAGATGTCTGAGAGGTTAGTCTGGTCTTGATGCACAAATCTTGCAAGTCCAAAATCACCACATGCGCAATC  
ATGTCAATTATCAAGGAGATTTGCTTGGCTCAGATCAATGAACATATTGGGGATGGTTTATAATGGTGAAGATATTCAAGA  
GCTGAAGCAACATGAATGACAATGTCTATCCGTTGGACAAGATCAAGACACCTATGGGTGCCTTGATCTGAGTGATGCTGGT  
GTAGCCACCGTCTAGATTTCCATTTGGTAGGAAATCAAATACAATAGCTTTGAAATCAAGACCATCAGAATCAATACTTGAG  
CACACTGTCAAGATTTTACAAGGTTCTATGCCGAGCACATCTCAGAGTCTCACATTCTGCAATAAACTTTGTGAAGCTC  
CTCGCTGTGAAGGTTGAGCACCTTACGGCAACAACTTGTCTTGTTCATGGTTCATCATTTGTTCCCTTGACACAGAGCCG  
AAGCTTCCAACGCCTATGAGGTTCTCAGAAGCAAACTATTTGTGCAATTCATCAAGTTAGTGACGAAACCCATCATAGTT  
ACCATTGCAATGCGGTAAGGCATGTTCTTCTTCTCAAGTCTCTTGTGATGACAGAATACAAATAGTGCAAGGACGAAG  
GAGATGCTAGAAATGAGCTGAGGATGATCATGACAAGCTTGGCGGATCGCTTAATGGTTGGAGCCGTTGGTTG  
AGCAAGGCGGCAATTTAGCTGAGGGATGCCCCACAGAGAGCAGTATTCCCTTCAACTGAAAAGGCACTAGCGTTAAGAA  
ATATTCCATGTCTGGGAACCTCACCATCGAAGTTGTTGAAGGAGATATCCAGTTGTTGAAGACCATTTCATTGTAGCAAGGAAG  
TCAGGAATGATGACGAGCAAGTTGTTTCTGGAAAGATCAAGAGCCAAAGAGACCCTTCAATTGGCCATTCAGATCAGGAATGT  
TCCCTTCAAAAGATGTTCCCTTCTATAATGCAATATTGTAAGATTGTGCAATCACCAGAGAGGCAAGGATTTGCCGCTCAAT  
CTATTTCCAGATACATCAAGGCTTGGAGATTTCTCAGGTGACCAACTTCTGATGGAAGTGATCCAGTTAGCATGTTTCTTGG  
GAAATAAGCATTGGTGGAGAGTGTTGGGTATGAGGAGCACTTCTTGGTATTGGACAGTAAGGCGATTNNNNNNNNNNNNNN  
NNNNNNNNNNNNNNNNNNNNNNNNNNNNNNNNNNNNNNNNNNNNNNNNNNNNNNNNNNNNNNNNNNNNNNNNNNNNNNNN  
NNNNNNNNNNNTCTTTAATATGATCAGCAAGCACCAGTACCAATACCAAAGTACTAAATTTCTCCAAATATAAGATGT  
TTTACCTTTCTAGATATATTGATTTTATTATGATCTAGACATAATATATATCTATATGCATAACAAATGCAACTTATCTACAAA  
AGCTAAAAACGTCTTGTGTAATGGAGGGAGTACCACCGGAAAAATATCTCTCTCATCTCCATTTTATTATGAGCATAACG  
TTGGATCTAATCTGAGCCACGCACCTTAGAAAAAGTAACTAATTTGTGTAATTTTATCCAAACCGTGCGCAAGGCAATGGTATGA  
GCACATTGAGCCATTTCCGCGTCTTGGACTCAGACTGCCGAGTGCCGACGCGCCTCAGCCCCACTTGTCACTAGAAAGATC  
CACCTAACCTTTCATCCCATTTGGATGCTGACCTGTTGACATGTCTGGAAAAAGAAGACCAGTGACTTGAAAAAGCCCCGAAGTCC  
ATAAGCTACGACTACGAGGCT

>SsLRR-RLK297

GAGCGCAGTACGCGGGCATGGGAAATAAATGAAGAGAGGAGGAAGAAGGGGCCGCTGAGGCTTGCAAGCCCAGACCT  
TGGCGTTGAGTCGACCCACGCGGACGTACTATGTTCCGGCTTAACTAAAGCGACGCGGAGCTCTGTGAGGCCATGACCATGT  
AAGTGGGCCCCCTACTGCCACGCGGCTTACTATGACCAAGAGTCCATGATGACATGGCAGGACGTCGCTGTGACCGTCCGGA  
TGCTAAGCCACAGCGTTGGATCCTATGACGCGGTTCTTTGGTCTATTTTTGAAAAATGTTTGTGAGGGGTTTATTGTGAAA  
AGTGTTTTTGAAAAGGACCAAAATGAAAAATTTTCACTCCCAATGACTACCTGCGCGATGCGCTGACGACGACCATGCCTT  
TTTCTCTGATCCACACCTGCTGCTCCGGCTGCAACTCCGGCCAGCTCTGCTGCCTGCCCTGCGACAGATTGCTTGGCCCT  
ACCGACAACCACTGGCGGATGGGGGCGCGGTGCTCCTCAGTGCCTGCACGCTAGGAGGCCCCACGAGGCAAGGCGC  
CGCACCGGCCAACTGCGTGCCTGCGTGACGCGCCGAACCGACGGCTGTGCTCGGCAACCACGACTGGCCATGCCCTGCAT  
CCTGCCGACACGGCAACTACTTCACTGAGAAAGTGCCCGCCCGCAGCTGCACATGGGAGGAGCCCCACCGCGTGGCGGCC  
GCTCGCGGTGAGCCCATAGGGCCCACTGCTCCTCTGCTGCGGGTGAACCTGTGCTGGAAGAAACCGATTCTTGCCAT  
GTGTATGGTATATTGTAATTTGTGGTGTCTTGACAAGTGACGGTATATTGCTTACTCAATTAGTTTGGCTAAAGTGCTAT  
TCTCACTCCGTGCATTACAGCAGACATTCTCACTCAGTGCATTACAGTAGATCACGAAGAAATAGAGCAAGGTTCCACGCC  
CGCAGATTTTTTTTTTCTTTAGTCTTTCTCTCTAATTTCTTAAGGTGAGTAGTCTCTTTTTCTTCTCCATCAGCATATATGTGTTA

TTTCTCCTTAATGATGATTACAGTCACAACCTTTGTGTTCTGTCATGTGTTATTCTCCTCAGCGCGGTGCTCCGCGACCCGACGC  
GGACTCGTGCTGGTGCATGACCCCCCTGCGTGACCTCCCTGTTGACGTGCTCCCGCTCGGCGGAGCTTCGACACGGGTACTT  
CTGGAGCTGCTGTGAGTACGGCGCCTCTCTTCATGTGTGTCAGGGCCCTAGGCGTGCGGTTTGCCCGCGGGCTTGCTGG  
CGGCGGGGCTGCACGGCCTTTGGGCGTCTTCACGTATGGGCGCGGTGCGTGCGGTTTGCCACGGGCGTCCGCGCGCGGG  
GCTGCGTGTCCGCGGCTACCTCCCTCCCTCCCTATGGCTCTGGTACAGGAAGGGCAGTGTGTCGTCTCCACAGCTCACA  
AGCGGGGTTCTAGGCGAAAGCTCTGCTCAGCTTTTGGTGGGCGACGATGAGGATCGCCATCGGGTGCATTTCCTTCTTG  
AAGGCATCGCTGAAGAAGCTCTGCTGCGCTCCTCTCTTGGTCAGTCAGGCCATTGCGGCTCTGCTCGGCGGACGATGATTA  
CGTCTACGCGTCATTACCTCCCTGGAGCATCGTGAAGAGTCTTTTGTGCGTGTGTAGTCTTCTCTCTTTTGGTGCCTA  
GCAGTGGTTGAGCCACCTTTGCGCCTCGTGTGGGGCATGTTGATGATGTTGTGTCTTATACAAAATCCCTTGTAACACTAC  
GGGCTGTTTTGGGCCATAATATAAATTCAGGTGGGGAACCGCTCCCCCGGTGACCGTCAAAAAAATCCCGGATTCAAT  
TTGGAACATTTCTGCTCTAACAGCATTCTCTGTCCAAAACAATTCTCTGAGTGGAGCAATACCTCCAGGAGCTATATTCTGT  
TTCAATATCTAATGCTTCCAAGATACAGA

>SsLRR-RLK399

GTGTCAAATTTTAGCATATTGGTCAAGGTAATGTAGTAAGCCTGCAGAAAAAATTGGAAGCCAAAAGCAAAAAAAAAA  
ATATTTTGCCGAGTGTCTAGAGAAACACTCGGCAAATAGTACACTTTGCCGAGTGTTTTGGTTGACACTCGGCAAACCAG  
CCATTTTGCCGAGTGTAAACGGAATACACTCGGCAAATCAATGACGGCGGCTAACCCCTCCACCTTTGTCGTGTGATACA  
TTTGCCGAGTGTAACTCGGCAAATGAAACGTTTGCCGTGTGTTTTATTGCGGAGTGTGACACTCGGCAAAGTGGT  
ACGTTTGCCGTGCGTATTGTTTGCCGAGTGTAACTCGGCAAACACTAGTTTTTACCAGAGTGTGAGATTTTGCCGTGTGT  
TTTCACTCTGACACTCGGCAAACGCGATTTTACCAGAGTGTCCACGTTTGTGACACTCGGCAAAGATAAAACACTCGGCAA  
ATCTCGGGTTTCCAGTAGGTATATAACTCTATACTCATATTTCTATTATTATGTTGCATATTCTTTATAAATTGTTCTAATATT  
TTGTTTAGATCTAAAATTTTAGAAAAATCATACTTCAATGTTTTTAAATCTCAAAAAAGATTCTATAAATTTTCAGCTGAAAT  
TTGCAAATCTCAAAAAAATTATGGTGGCTCCCCGTCACTAATCCCGCCCATCGCCCATGGTTGTGTCATGGTCATTACTTATTA  
GCCAAGACCCACTTATAGAGCTGTACCCACCCCACTAGATAAAAAAATCTAGGAACCCCAACCTGGATACTAAT  
CCGTTGTCCGAAGATTTTGTAGATAAATATACTTTGTTGCGTCAAGAGTGTTCGGTAGTTGACTAGTAAGAAGAGAGTGA  
GAGCTTGGTGACAAACCGGTATCTATGTTCACTACTTCACTGTCAACTGAGAGCATCTCCGACAGCCTTTCTTAAACCTACTC  
TCCAAATCCTTATTAGAGAGTTATTCTAATAAAAAATAGTTCTCTATATATGTCCACCCTTAACAAGTTCTCTATATCTTGTTGG  
GTACTCAAGAAATCAGCTCTGCTCTCTTTGCCGAGCTCGAAATCAGAAAGAGGATGAAAATATTAGAGACCTAATTGAAG  
AAGCTATTGCAAGGAGATTTTCTCTTTTCTTCTCAAAAACGACGAGAGCTACGCTTCAATTATTAAGAAGAAAGAGGGG  
GTAAAGAACCCTTAGTACAACACACACCCCAACAAATCTTATTCTATCAATACGAAAGGATATAAAGGGTCCCTTGGAGTT  
CCTCGTGGCAAATTTCTAGCACCAACCTATGATTTCAAGGATAACAAAGACATAAGCAGTGGTTCAAAGTGTGTGTGTAGTC  
AGTATTCTTTGTCTAAAAACAATTTATGTGAACCCCTTTGCAATCAAAATTTTAAATATTCAGACACGGAAGGGTTTTTGA  
AAACTGTCTCTAGCGAAAGTTGGTTTGCAAATCATATCAAAATACTATCTTGGTTATTCTTTTATGAACGTGATAATTTAAGTTT  
TTGTATCCTGGTTGTGCTATACTAAATAAGAGTTTAGCTAACTGAGAGATAACAAGAACAGATAAAATTTATTTGCAAA  
CGAGATGATGATATACGATCCAGCTCCAATATGTGACCTTCGAAGCAACTCATCAATTGCCAGACACCCCTCTATAACAAG  
AGGCATTTTCATATGGCACAGGTAGAGTCAACCATTTAACAAAGAGAGTTCAAGAGCAACGAATAGTTTGAATCCAGCAAGCTG  
AATACCAAAAGCATGCGTTCATCCATCTTCTAGTTCACCACATAAGTTGGACTATTGTAGTTGTAGAGCAGCAAGGCACTA  
CCGGTTTACCGCCCCATATATAAGCATCTTCCAGCAAAGGACAATCTGGATAAACAGCAATAATGGCCCGTCCGTGTGTCTTT  
TCACC

>SsLRR-RLK267

ACCAGAAGAAAAAATATCCAATGGACACCTCTATATTTTTTGTAACTAATTTATGGAGAACTCACAACACAATCTGGAT  
GGAGACATCTAGAAAGTTAGTAGAAACAAAAGCTAAACGATGGATGCAGAACTCTGTGCTTTCTAAACGTTTGAATCATATA  
TTTTAGTTACAAAGGAATACCGAAAGAAAAGGCATGGCATGTCTGAAACACATTAGCAGAAGACAAAGGGAATCTGAATTT  
TTTGCTGTTTGACCCCAATCATCACTTATACTGACAGAGTTATCCACTATATAGTTTTTCATGATAACGTGATAACACACATCTGA  
TTTTAATAGAAATGCACTTTAGACTTGTAGCTGCTTGAATATTTGGAGAACTTCAATTAATAATTCAGTATGATAAGCTGTTG  
TACAGAAGGTTGGTCTAGAGTATGATGCAAGATTCATCAAGTATGATATACTGGGAAAGCGGTGCATAGGATGCAAGTGA  
ATCAGTAATGATCTCTATGTATCTCAAACCTTTCATATGCAACCGACTGAATTTGAGTTCCTTGTGTTGTGGCACTTGATCTG  
TTCTATTCTGCACATGAATGTGACAGAGTTAGAGGTATCTCCCTTAATTTTCCAACAATCTGTACAAAATATTCTTTATTGTC  
AAGTTTTTCCAGCAGCACAAAAGTAACTGCACGGACTACTGTTTGAATTTAGGATGCAAGAGAATGGGTAACATTGA  
AGCACGTATCTGTAGAACACATGATGAAGCTGGCTAGGGAGTTTAAACCAACACCGCACATATTTGGCATCCTGAGAACAGG  
CATAATGAGATAGCCTGCAGCAAGCACAGATGCAGTAAATGATGACCAACTCCTTTTAGCTGTGCAAGGCATGATTTATAAT  
AGAAGTAGAAAAACAAATACGCCAAAGGGAATCTAATCTCCAGCATTCATACGAGTCAGAAAGCATGTAGCGAAG  
TCATTTCACTCAGGAGGGAATCCATCGATCTAGCAGGATCTAGAAAGGGAATAATTCAGTGGTAAAGAGCATATACACGTA  
AATAGGTACATGTGGAACATAAGCTATAAATTGTTGCTCCCGAGCAGTATTTTTCGACAAGGACCCCAACAAATGTC  
ACTGTTTAAAGAGAATGTGTTAGATCTGATACAAAAGCTTAAAAAACTGAACTTAGGCAGGAAAGCGCCGAACATAGAGAC  
CTGGACACCTAGTGTACGGCAGCGGCAGCAATGGCTGGCTGAGTGGCGACGCGGAGCTCACCCCATCGTCCGCTCCTCGG  
TCACACCGGACGAGTAGGAATGAAGGGGGACAAAAGCGAGGGCAAGAGAGAAGGAGCTGGGAGTTTACCTGCTGCTG  
CCATGCAGCGACCGCTGTTGTGCTCGGCAAGCGTGTCCATGCGGGAGCAGGGCAGCACTGCTGGGGTGGGGTCCGGCGCT  
GGGCGGTCCCGACCTCCGGCACGCCATCCAGCACAGGCACCTAGGGTTGCCTGTAGCACATGAGCACACGTAGAGCAGAG  
AGAGAGGGCATCAGCGAGGGGCAGTCACACCTGCGGTGACGGCTCGCCACTCAGGCCATGCCGTGGCCGGGGACTGGC  
ATCGGCGGGCCCAAGGCAGTGCCGATCGCAGTCCGGCGCCCAAGCAGCGTTCCGCCGCCATCGGGAGGGGAGGGGA  
GAGAGAGGAGGAAGGGGTGCGGAGAGAGGAGGAGGCGGAGGCGGAGGAGGGGACGAGGTGGAGGTGAAGGATGCCTC  
ATCCAGCGTCTGTGCAAAAGGCCCAAACTCGCTCCACCGCTGGTTCAGCTCGGGAGGAGCGGAGGCGTGCACAACCT  
GCGTCGAGACTTCGGGAGGAAGAGAGGGAGCCGATAGAGACGAGCGAGAGAGGAATAGGGCGAGTACTGTACGA  
ACACTAGGCAGGCAGGGCGACGGACGAGCAGACGGGACCAGGAC

>SsLRR-RLK269

CCGATACCACTTGTAAGGTCCAATAGGCTAGAGGGGGGGGTGAATAGCCTAATTA AAAA ACTTCTACAATAATTACTTAACC  
ACAAGTTAGTACAAAAGGTGGCGGAGCAAAATGCACTAGCTCTA ACTAATTAAGCAAGCCACTACACAAGTCTAGTACAA  
GGCTGTTCACTAAACACAACAACAACAAGCTAGATAAAAGAGTAATACGAGAGAAGAGCTTCGAGTGATTATACCGCC  
GTGTAGAGATGAGAAGTACCAATAAATCGATCACACAAGAGAAATCCTCGGGAAGAGAATGACACAAGAATTTATCCGAG  
GTTCACTTGCTTCCCGCAAGCTACTCTCGTTGTGGCATGTGACCTCACTCAATCTCACTCAAGATGTGCAATCAAGGATGAG  
TTGAGCCCTCGGCGGGGCCACACAACCGCACACAAGATGGGGATCCTCCAAGCCACGAGCTCCACTAGAGTATCCAATTC  
GCGAATCTCCGCGGGAAGGATCAAGAACCCTTACAACACTTGGTGAAGGCTCCAACAATCTCCAATTGTGAGCTCAATCA  
CCTCCGCTGCTCCAAGCGTCTACCGTGTGCGGAAACACGGAAGAGTAACAAGAAATCCGCAGCAACTCGAAGATCAAGT  
GCCTTAGAATGCAACTCTCAAGCAATGCATTTGAATCTCACTCAATCTCACTCAAGATGTGCAATCAAGGATGAG  
TGGAGGGGTTGTTCTCTAGCTCAAAGTATGTCTCTAGGTCTCAAAATGTGCAAGAGTTACCTCAAACCCCGGCCACCATCT  
ATTTATAACGAAGGGTACGACGCTAGCCGTTAGAAACAGCGACGACAGAAATCGCGCTGACCCGACGCTCCGGTCAAGGTG  
ACCCGACGCTCGGTCAGCTACGCGACGACGCTGAATAGTGCCTGAGAACTAGCCGTTACCGTTGACCGGACGCGCTCG  
ACCGAGCGACCGGACGCGTGGTACGACCGGACGCGCGGTCCTGACCCACCGGACGCGCGGTTCAACACCGGAGCCG  
CGCACTGCGAAACACCGACCGGACGCGCTGAAGAACGACCGGACGCCACAGTGCCCGCGTCCGGTGGGACTCCAGTAAG  
CACCTGGACGACCGGACGCGTCCGGTACCTATGACCGGACGCGCACCGCGTCCGGTGGTCTCGTGAACCGCTGTTCCG

CTGACCGGACGCGCCGGTGCACAGTAACTGCGTCCGGTGCAGCGTCCGGTGCAGCGTCCGGTGCACGCGTACCTCCGT  
TCGCCTCCATTTCTTTCCGACTTTCGGCGCAATAGAAAATAGCGGTTTCACTTCTCTAAAAAGCGCCGACTCCCGCTCGCA  
AGCTCGCGGAGAGGGAGGGAACCCAAACCCCTCTTACCGCTTAAACTCCACCGCCTTCAACAAAGTACTAAACACCAC  
CAAGGTACACCACCATATGCATGTGTGTAGCATTTCAACAAATTTTCCAAGGCGTTATGTTGGCTCTTTACTAGATCCTAA  
ATGCATATGCTCAAGACATTGATCTAGTGGCACTTGATTCCCGAGCTAACCGTGATTCCCTCTTGATAGTACGCTATGTATC  
CTAAATCCGGTCAATCACTTCTACTCATCTTAGACCGGCAAAAGGAAAACCCATGGTTATACCTTTGCCTTGGCGCTCTTA  
GATCCTTCTCTTCCACTTGATCATCATGTCCATCATTTAATGTGCATCTCCACCATGATCTTGCTCATCATTTTCATGCACAAAT  
CATGTGGTCTTGTGGCCATCTTTCATGCCATTTCCACCTCCATCACATGTTGCTTATGCCTAGCTTAATCACACTTGATACAAT  
AGCATTAGCAACTTGGTGTCTTAATACCAAAACCAAACTTGGGCTTTCAGAGGGGTGCTGTGGTAAGGCCCTTCCCC  
TTCCGTTGTTTCACTGGAGCTGAACCTTTAC

>SsLRR-RLK281

GACGGAAAACCTCCTCCATTTTCACAAATACGAAAACGGACCTGCAAATACGAAAACGGGACCCATAAAAAATGAAAAA  
CGGAACAGTCGAAACGGAAATTTTCAGTCCGTTTCAACCTCCTTCGCCCTCCACAGCCGCCCCATCCGCCGACGGCA  
AGCAGCACCGGCATCACATCGTGCAATTCGGCCGGCAACAAACGCGAGTCCGCAATGGGCTCGCGGACCATGTAGCCCTTGT  
CGCGCATCGAGTCCCATTTCCTGCGCGGTGTGTTTTTTTTTTCCTTGGCTTGTTCACCTGAAATGTTTCGATGCAATG  
CCTCAAGACAGTTCGCTCTTAGGGGAGGCACGAAACACAACAGACAAAAACAAGTGCTGGGCATCTAGCACAAGCAGG  
CGGAGCAATTCACAACCTCACATCGAGGCACTCAACAGCAGCTGCAGCAATGCAGTCTGAGCAACAACCAATGAAGGAG  
GGAGGCGGGTGGGAGGGAAGAGATCCCTGTATGCCGAGCCCATGAGCTTGCTTGCATTGCGACCACAGGCTAATGGGG  
ATGGGAATCGCGGAGGAGAGGAAGGATGCTTGGATCAGAGGAATCGGTGAAGAGGAAGGAGGCATGAACCGAAGGCGC  
GAATCAGCAGCGAAGAGGAGGAGGCACGAGCTGTAGAGACTCAGAGGAGGCACAAATCGATGGACCAGAAGGGGCCG  
GAGCAGCTGGATTCGGGCGGTGCGCAGCCAAAGGACCAGGTGCGCTCTCTGCGCTATCCCTTCGCTACTCCACGCCCACT  
GCATCGTCCCTTTGATTACCGGTGCGGCGTCCGCTCAGGCTGCTGGGTTCAAAAACGTCACGGCATCATGCTTAGGTG  
ACGACTTAAACCATGGTGATAGGTTTCATTGTGGGATGAAGTAGCCCTTCTGAAGCAGGAAGCCAGGAACAGTGCAAGGA  
AAACAAACGTAAAGTATTATGTCTATTTTCTTCCGAAATTTTGTGGATGAGTATGTTGACATGGTCACATATCAC  
CTGGATTCTAATGGTAAGAAAATGGATGGATAAGGGTGATCGACCTTGATGCTATACCTACCGTATTATGAACCTCCCAGGCT  
AGACCAGTTAATCTAGTCTGAAATTTCTTTAAGATGTGTCAGCTTCTTGTAATTGAACCAAGGAGCTGCTAGTGTCTA  
GGTTTGTTCAGTTATGATTGTTGGCCATTAGCAAAATGTTTATAAACATTGCATGGGTTCTGGTAGTGGAAGTGTGAAAA  
TACTGATGCTTCTGGCAGAAAAATGCTAATTTAATTGAAAGTCAGAGCTCCTGTTGCTTACATAAGAAAAAATACTGT  
AGTCTGTGACCAAGAGCTGTGCAAGTAAGTCTTGATTTTCAGTTGAAATGCCTCATAGGTAATTATTATACTGATGGTCAG  
AAGGGCATCTTGAACATAACAAAGGAATAATCATGCTTCTAAATGCTATGGAAAGATCTAAATGTCAGTTTCAGAGTTT  
TTCCATCTATCATTTGAATTATGCCGATTACTCTTGATGTCTGGTTTCATTACTTGTAAGTGTAGTCTGAGTCTGAGTCTT  
TCCTGGTACAAAATATATGCACCTTTGTTGTAGAAATTTGATTGATTATTGATAAATATCATAGTTACTACTGAGACTCTTTG  
GTTGAATAGGGCACTGGCAAGCATGGAATAATCCCCATTGACCACGTTTCTTCTGGTACCTTTGTTGCTTTCTCATGTCACT  
CCTCATCCACACATCGGTCATCCCACTGATAAGTCTGCGTTTAGTCCAGGGCTACTTTGAGTATGACAGCAGGGGATGAATG  
ATTATAGTGAATCTACACACCAGGGATGGATCCAGAAAGTAAAGGAAAAACACACACACACACACACACACACACACAC  
CACACACACTTCTTAGACGTGGAGAGA

>SsLRR-RLK268

CAATGATCACCGCAAGCTATTGTGAGCCTGAGCCTTAGATCAGTAGCTTTCTTTATTTAACAGGCAACTTTCACCAGAGTAC  
TGGCTTGGTTCATTTTTGTACCGGTGCATTAATTAACGCTGAAACGGCAGAGTATATGGCTCTTTACAATCAGTTAATCAGGA  
TGGATTTTATGAAGAAAAAAACAAATCTGATTGCAATATGGCAAGAAATAACTTCAGAATTAATGTTTGAACATAGTCCAG  
TATAACAAATTAACAAGCACCTTTTCGTCAAACCTTGAGACTATATCTGAACTCGCTGGAGCTTGAATACAAAGAAAAAGA  
TAGGATGCTGTTGGCAGAAAAATGCTAAGCTGTTTCTGTACTTCTAACAACCTTCGTTGAATAGTTAAATGACAAATTAAGT  
GACCGTGTACAAGTGTTCGTGTACTGCTTACATGTTACTTTCAAAAGGGTACAGATCTAAGAGTATCCTTACCTCAGTACCA  
ACCGGACCAAAATGGTTACCTGAAACTGCAACTGCAAGCAACCAACGTTCAATTTAAGTGAATGTTCCGAGGACAACA  
TGCTGTAGTGTCTCTCTTGGATTCTGTTTCTTAACTTACGGCATAATGACCGATAGCTAGATTTCTTCTACAGCAATAG  
AGGATTATTGTACAAAGGCGCAACGTTGCAATCAACTGTGTTCTGGTGGCTTCAGTTACAGGCTGTGCTGAAGCCTGTTG  
CACAAGCAGCAGGTTGCGACTTCAGAAATCCAATTCAGCGCTCAGGGAGTTTAGCAATTGCGCATGATGCCGTTAAGGGAG  
TAGATGGTTTTTTTCCGCTGTATGATAGATTTACTTAATCAGTGCACAAGATCTAGCAATAAAACAATGAATGCGCCCACTA  
TCTAACCTCGAATGCATGATAGTCCAAAAAAGTGTCTTTGACAATTGATAGTACTTCAAAATATGCATTCATGCCACTCTAG  
TCTCTAGCCTTCTTTAGAGTCTAGACTGGCAATTAAGGAGGTGTTTGGGACTACTCCGTTCCACGTTTTTCAGCTCCGCTC  
CAGCTTGTTTAGCCAAACGGTTTCAGCTCCACGCATCTATTCGAGGAAAAATGGTGGAGTTGTGAGAGCACCTAAAGAGA  
TACTCCACAAGCTAAAGTTTGTGGAAGTGTCTACGATGAGGTTGTGGAATAGTCCCAACACCGGTTCTTGCTGATCT  
CCTAAAGAGGAAAAAGGCTCCCATGGGCATATATCGGCAAAATTAAGCATTGCATCATAGATCAGTGCTTGTGTTTCAGGT  
GACTATTTAATTTTAAATATTAGCATGAAAAAAGGAGAACGATGCGAATCTGTAGATCAATAGAAAAATCCTTGACCAA  
AGAATTGCTCTCATCCATCAATTTGTTTTATTGGTAGTACTACTAGCTTAATTTTCCTTCAACTCCTTGATGTTTGACCCGGTAG  
CCGTTATATGAAGATCAACTAAAGCGTGTCTGGATTTGTACACTTGTGTTTAAATAGCACTTGAATCTAGAACGTTCTTTTC  
AAGACAACATAAAATGAAATAGCATTGAAATCTAGAATATCAATTGGTTATTAGGTGATATTTATAATCAAATATTTGGTG  
ATCATGGCGAATCAATCAATTGTTAATGATTGAACTGATAGGTTGAGTCAACTTGAAAGCAGGATTAATAAAAAATCAAGAT  
CTAGTGAATTTGTATTGTAACACAAGATAATATAACAATATATTAATGGTACAGACAGAGATAAAATGGTAGGACAAAT  
GTGACAGATTTCTGATCTACATCCCTCTCATTATAGATGTTCACTTGTTCTGTTCTAGACTTTTCTCCTTGTCGGTAGGTGCA  
ATCCAGAGGACAATTCATGCACAAGACGCAACGAGAGAAGTATAAGTTTCTTACTCTGCACACATATCTCAAAACAAACA  
CATGAC

>SsLRR-RLK370

TATGTTCCACGCATTTCCACTAGAGCGGGCCAGGGATTTGCACTAACAAATATGGAGTCTTCCACTATTATGTCTTCCAATAA  
GGTATCTAGCTGCCTCCATTGCAAGGCAATAATGATTATCAATCTACATAGTGAAGACTATGGTGTCTTGTGGGTAGATTAT  
CTGTAGTGCATTACATAATGGCTACTCCTAATGCATTATATATTATTGTAGATTGTACGGTTAGATCCAGATCTAAACGGATC  
AACTAACCGAAGAAATTCAGAAAGCTTAACCAATGGAGGTGGTGTGTAGAATGGGGTATCTTTGTTAAAGCTTTGGGGAGG  
CCGAATTTCTAGCCATAGCTGAAATGTATTCTAGGGATAGCTTGGTTAGTGCGACCCAATGGAGGCTGCGATAGAGATGGC  
TAGAAATTCACCCAGATGTGGCTAAAACTGTTGTGTGCTAAAAATCAATTTATGTAGTAGTGAACATAGTTATATATAACAG  
GAATGAATAAACTGATGAAGTGTACAAATCAGGATTTGCTTCACACAGAGGACATGCTACATCGCTTAGGCTAAAGAGGTCA  
TATATGCATCACCGATATAGGCATATAGCTCCAAAAGTTCTCTAAATGGTTCAAAAGCATATAGCCATAGACCGTAGTGCGAG  
GTCCATTGCCGTACGAACCATGTCCAAGTTTGACCACCTTGTGTGACTGAAATAAGCATTAGCCATTTTTTCTATTAGGTTCA  
GTCCACATTAGTAATTGATAGTGGGGGAGCACAATAAATAAGACGGAGGCAGCCCTTATCTATCAGTTTAATTAGTCTCTTG  
GATTGAGTTAGGCCCAAAGCCTGGGTATGTTGGTTGAGCTGGGCTAGAGGCACCGGCTGTGAGGACCGGATTAAGCAG  
ATAGGCCAGTATCAGCTGCGCACTCAAACACTCCCGTTTCATGGAATATCAGTTTACAGGTCCTCCCATCTAGTTGGGCGTTC  
CCCTTAAGACGAGGGTCCCCGAGTACCATAATAGCGACAACATATGGTCTACACCAAAGTTTTGGTTCTCAATGTCACTTATA  
AACTTTTAGTTGACAAAGTTCTTTAATTAAGTTCGAGTGAAGTCTTAAATATGTTTCAAAATTTTAGATTTTCAAAATTTA  
AAATTTAAATTTTCAAAGGACCTTGATTGTTACATGGTCAATACCATATTTGCAGTGGTCGATGTGTTCTATAGCTTTGTAG  
TTGACAAAGTTTTTTTATTGAAAGTTGTTTTGAGTCCCAAAAGTTCAATTTAACTTATGTTTGAAGATTTATTTTAAATTTCA  
GACAATCTCAAATGGGAGACATGTCCTAAACCAAAAGTTATAGTTTTTGACACGATTTAAACTCTGTGGTTCAAACTTTTTGT

>SsLRR-RLK331

>SsLRR-RLK318

>SsLRR-RLK347

GACTTGTACATCAGGGTGGCAATGGCATGGCACTCTATATAACCTCACCATATACGGTTAGCCCAAGGCAGCAGGGTTATCTA

CACATGCATCCATCCATATATGCATAGAAACAATGTCTCACTCTCACATAGCCATCCACAGCAATTCATCTCTGCTCCTGCTTG  
CTTTTCATCTCCATCCACTTCTCTTGCTTGTGTCAATACACATACCCGCCGCACTGAATGAATCCAATGCTCTCTCTGTCTCA  
AATCTCAGCTCCGTGACCCATCAGGTGCATTGGCCCTCATGGAGAGACGACATCCCCTGTGTTCTGCAAGTGGCATGGGCTGAC  
ATGCGGCAGCAGACAGCTGGCATCTGGATCTCGAATCCGAGAACATCGCTGGCAACATATTCCTTGAAAGGATCCACAT  
>SsLRR-RLK348  
GCTTGAGCTAGCAAGAGCTAACCTTGCACGCACAAGACTCGAGAAAAGTTTGTTCAAAATCCAAGTGCCTGGTTCTCGCTC  
GTTATCCTGACTAGACAAAGACAGCACAGTACCAGCCAAGAACCCAAAGCACGCTCTTGCTCTCTCCATGTCAGGCTGGTCAC  
ATAATGCCAATTTCATAGGCCCTATAAACTATATTTTGTGTTGATTATTAATCCACGCTACTGCAATTCACCTGGTTTAAATTTAA  
AACACATTGCCATAAGTTTGAATCAGAAATATGCCATTGCTTTTGTGTTTGGCGATATATACCCTACGTAAATTTCTCG  
TACGGTTCTACCATACGTGGGATTGTAAATAATCCAGCCTGCTACCTCAGTTAAATGCATTAAAAATTTCAAGAAAATAGTTTC  
TATAACACATGAAAAACCCCTTTTGTGCTCATGATGAATACTACCATTATATTGCTCTTGTCATCTATCTTCTACAAGGAAAAAA  
AAACCTAAAAATGGCAAGTCTTGTGTCAGAGGCTGTTCTCTGGGTGTACCTACAGCATGCCCTGCCCTAATCAAGGAAGACAT  
TCTTTGCAACAATTATAGCCCACCTACTCTGCTCACCTCCCACCGTGTCTGTACTACGTCTTGCAAGTTGTCATGCAAGCCT  
AGCTGGATATGTGCACACATCAACTCCTAGCCTTTCTTGCTCCCTCCTCCAAATCAGTAAATGCAAGGATTTTTTATTTA  
GGTTTTCTCTTCCAAACAAAAATTCAGCACAGCTTGATGCCAATTTGTTGCTTGCCAACTCATTCCAATACACTCTTATGTTT  
TCAGCCATCATTTTGGTTAATTTGAAGAGTATGATGATTATGTCTCTCTGGCACTCATCACGGATTGAAGAAAAAAGGGGT  
TAATAAGGTTTCATGTTTCTCTCTCTTATAAGCTTGACGGTCTATCTATTAGTGCTGTGGTACTACCATGTCAACATGATGTCAA  
TCAAGTAAAGAAAATGTTGGCTAAATACTGTACTTAAAGTGCCACCCGCAAACTCCAAAGTATCCAAGGAAGGAATTTGGAGG  
GGGTCCACGCTCAGATGCAGCACAGGACCCACATAAAAGACCCAGCCCACTGTCTCATGATTGGCCAGCTGCTCT  
TGTGGGTCTGTTCCAAGCTTAGAATCCACGTGGACAAGTTGTGCGGGCGCTTCTATAGTGTACCTAAATANNNNNNNNN  
NNNNNNNNNNNNNNNNNNNNNNNNNNNNNNNNNNNNNNNNNNNNNNNNNNNNNNNNNNNNNNNNNNNNNNNNNNNNNNNN  
NNNNNNNNNNNNNNNNNGATCAATGTTACAATGACTTTGTGCGATGAAAAATGACTAAAATAAAAATGTAGATCTTAATGAG  
TTGTACAACCTGTATGTTCAAACTTTTCAAATAAGATCATTACTCTTTGAAAATTTTGTTCAGTTGGCATTTTTTTGAAA  
TTCAAATTTTGAATTGATAAAATAAAGTCACTGGAAAGGTGCAAAAATGAAAGGTGTAGATCTTAAAGGTTATAGAAAT  
TTGTAGTTGACAACCTTTTTTATTTGAAATCATTTTGTCTAAAAAACTATGTTTAAATTTCTTAAATTTGAAATTTAAATTTTTG  
GAAGAAAAAAGAGTGAATCGAGCCCATTAATGCAGGCCAATAGCCCATCTATAATGGCTGCTCAGCCCATGTCATCCT  
GACCCTCGATTCTGATCTGATGGCCTTCGTTGCGCCCATGAAACATAAAAAATTAAGCAGCTGAAACCCTAACCCCCACAG  
CTCACACGGAGGACCGCTCTCCACCACCCGACCCGCTCCCAACGCGCCGCGCTCCGCTTCCGAGCTTCCGAGCTCCGACCC  
TCATCTTCCCAACAAGCTGCACCGGGCCCTCGCCGTGACCCGCATCCCTGCACAGCGACCTCTCCCTACAGCTCTGCGGT  
GCTCCGGCATGGATC  
>SsLRR-RLK349  
AGTTTGCATCTAAGTCAACCAAGATAAATCAAAATAACCTCATACGTTTTTGTATAAAGTACCCACATCTCCCATTATGACAAGT  
AATCAACCCCCCTAAATTTGCATCTAAATATCCAGTTATGTCATTATGAAATATAATCAAAATAACCCCTAATATTTCAAT  
TAAATTTACCACTTTGTCATTATGAAAGATAACTTAAACAATCCTCTAACTTTATATCTAAATACCCATGTCTACAATTACA  
AAAGATATTTAAATATACCTTTGATTTTATATATGACCCACTTTATCATTTATGAAATACTCCTTGCAGAAAAGAAATGCAACT  
ACGGGTGTCATGCCAGCATGAATGGTTCACGTTTGACCAATGTCTAGTAAATACTATTCTATTTTGTGCTCCAAAATAATTT  
ATTATGAAAAATCATTTTCATAGTTAATCTAATGATATTATTTGATACATAAATATTGATACTTTTATCTATAATTTGATCGAACT  
TAGGATACATAAACCTGACACTGTGCTAGAATTGTATTCTTCTATGACCGAGGCAGTATAAAGCAAGTTAACTCTAAAGTT  
TGCATTGAACCTACCCGTATATGTTGTTGTGAAGATAATATAAAATATTACTTTTATATTTCTATCTACCTCATCCATTATAAAAA  
ACTAACCCAAAATATATCTCAAATCTACATGTAAATACTTATGTATATTATTAATAAATGAATATCCATAAATTTGTATACATATA  
TGTATTTCTAAATCAATGAATTATGCAACACTAAAATTAATAACCATATATTATGTTCTACCGTGATTTCCCTCTGTCCCAAA  
ATACTTGACCTTATAGGTGTGGCATGGAATTTTAAAGATGAAAAAGGTGTGGTTACAGAAAAACAACAAGGAAAAAG  
ATAGAAATAGAGATGTACTGAGAAAAAGAGAAAAATGTATTAAGAAGGAGAAAGGTGCATCGAGTGCTGTAAGCTCAAATAT  
GTTGGGACAAAATTTGAAAGCGATAAGTTCAAGTATTTTGAGACGGAGGGAATATATCAAATAACATGATACATTAGAACAA  
ATATTTATTTAATAACTTACTGTGCGCCCTCATTTGATTTTATGACCCCTCCATCTTCTCCTTGAGGAAGGCGTATGCTCGCT  
CCCATCGCGCGCTTGGTCTCCTCCTCAAGCTCCTTGCCAGTAGCGTTGTGCTGCAACTTCGCTTGCCCGCAGCTCGCACCT  
TACGAGGATCTTGTGCGGTGTGAATCTCTTTAGCCTCTTGTGCTGCGGCTTGCAACCTCTCTATTAGTACTTAT  
TTCTAAAAAGAAAAGTGGATGCTTATTTCTGAAAAGAAAAAGTGCATGATATTCATACTACATATCATCACTTGCTCTGTAGT  
CTTGTGATAGGTCAAATGCATGATACTATACATCATACATGCAAAATACAAAGTTTGGGCAATGATCCTCTGCCAGCTTC  
AAGCTTTGAGCTTTCTGGTGTGGAGGAGCTCTCATTCAAATGTTTGTGCTGTGGCATTTTACTCCTCAACAAAACATTATTTGG  
AAAAACATGTCTAGTACATGAGAAAGCTGTGATATAATGCCATTACCCTACTTTGATCAATAATTTATTTGTCAATTTTAA  
AAAATGTGCTGAATAAGCTGTCCAAATTTGCTGCAAGCTCCTTTTGTGTACATCAGGCGCATAAAAAACCTGGGCAATTG  
TACTTAGGTCAAATGATTACATCATATTTTAGGAAACGTGTTGACTGAGCTGTCCAAATGACTGCAAGCTCCTTCATTTTG  
TACATCAGGGCGCATAGAAAAGCTCCTTTGTTGACTCTTTGCGGCAAGATGTTGAATGGTCTATTGCTGAAGAAGCAGAGG  
GTCACAGGCACAAGATAACACCATCCATTATGAAGTGTGAAGTCAGATTACATACAGTGAATAGGCA  
>SsLRR-RLK337  
CACCATCCGGCGGGCTCGGCGAAGCCCTCCTCGGGGTGAGGGTCTCGTGCGACATCCGGCTCCCTCCAAAGACGCCTC  
CGGGGTCTATCTGGTTCGAGGCGCAGGCGCGCTCGGCATAGCGGCATCACCCGACGACGGTGGAACGCGCTCGCTACTGCCGC  
CGCGTTCAGGCTCGAGCACGAAGCTGCTGATGCGCGCGCCAGCAGTGGGTCCAGGCGCGGCTCTCGACGTCCGGCAC  
GCCGTATACCCAGTTGTGCTCCCGGGGTGAGCAGCGCGCGGCTATACCTCGGCAGCTGGTTCTCGCTGTCGGCGAGGTAGA  
ACCAGCCCGTATGCCACCGCTGTTGAAGAGATGAGGCGCGCGGATGACTGCTCCGACCGACTCGACCTCAACTGGA  
GGACGCAGCTCCCAACTCGCACGGCGTAGAAGGCGCCCTCGCTCCCGCGTTCGCGCGGAAAAAGCTCGGCCTTGAAAAAGG  
TGGAGCCACAGGTTCCACTGCGGCTCCACCCGAGGTATCCTCGCAGACCGCGCGAAGATGGCGGCTGCGCAACGGCG  
TTGGGGGCGAGGTGGTGGAGCTCCACCCGGTAGTAGTGGAGGAGCGCCGCATGAAGGCTGACGACGGGATGCCGAACCC  
CCGCTCGTGGAAGCTTACGAAGCTACACGCTAGCCTTCCGGGGGGGCGGCTCGGATGGGTGCGACGGCGGCGCAATCCAC  
TCCGGCGCGACCATCGACTCGTCTTCCGGCGCAGCAACCATCCCTCCGCGACCGACTCCTCCAGCTTCTTCTCGNNNNNN  
NNNNNNNNNNNNNNNNNNNNNNNNNNNNNNNNNNNNNNNNNNNNNNNNNNNNNNNNNNNNNNNNNNNNNNNNNNNNNNNN  
NNNNNNNNNNNNNNNNNNNNNTGAAAGCGATAAGTTCAAGTATTTTGAAGCAGGGAATATATCAAATAACATGTATACATTAG  
AACAAATATTTATTTAATAACTTACTGTGCGCCCTCATTTGATTTAGACCCGTCCATCTTCTCCTTGAGGAAGGCGTGTCT  
GCCGTCCCATCGCGCGCTGGTCTCCTCTCAAGCTCCTTGCCAGTAGCGTTGTGCTGCAACTGATCTGCTGCGGCGAGCTC  
GCACCTTACGAGGATCTGTGCGGTGTGAATCTCTTTAGCCTCTTTGCGTGGAGCTTGCACGTTTCAACCCCTCCTCTATTA  
GTACTTATTTCTAAAAGAAAAAGTGGATGCTTATTTCTGAAAAGAAAAAGCGCATGATATTCATACTACATATCATCACTTGCTC  
TTGTAGTCTTGTGATAGGTCAAATGCATGATACTATACATCATACATGCAAAATACAAAGTTTGGGCAATGATCCTCTCCAT  
CGACTTCAAGCTTTGAGCTTTTGGTGTGGAGGAGCTCTGATCAATTTGTTGCTGTGGCATTTTACTCTCAACAAACATT  
ATTTTGAAAAAACATGTCTAGTACATGAGAAAGCTGTGATATAATGCCATTACCCTACTTTGATCAATAATTTATTTGTCTC  
ATATTTTAAAAATGTGCTGAATAAGCTGTCCAAATTTGTCTGCAAGCTCCTTTTTTGTGTACATCAGGCGCATAAAAACCTG  
GGCATTTGACTTAGGTCAAATGATTACATCATATTTTAGGAAACGTGTTGACTGAGCTGTCCAAATGACTGCAAGCTCCTTCATTTG  
TTCATTTTGTACATCAGGGCGCATAGAAAAGCTCCTTTGTTGACTCTTTGCGGCAAGATGTTGAATGGTCTATTGCTGAAGAAGCAGAGG  
AGCAGAGGGTCACAGGCACAAGATAACACCATCCATTATGAAGTGTGAAGTCAGATTACATACAGTGAATAGGCA  
CTATATAACCTCATCAAATACGGTTAGCCCAAGGCAGCAGGATGATCTACACATCCATCCATCCAACCATACATGCATAGAAA

CAATGTCTCACATAGCCACCCACAGCATTTCCAAC

>SsLRR-RLK350

TTTGCATCTAAGTACCAAGATAAATCAAATAACCTCATACGTTTTTGTATAAAAGTACCCACATCTCCCATTATGACAAGTAA  
TTCAACCCCCCTAAATTTGCATCTAAATTATCCAGTTATGTCATTATGAAATATAATTCAAATAACCCCCCTAAATTTTCATTTA  
AATTATCCAACCTTTGTCTATTATGAAAAGATACTTAAACAATCCTCTAACTTTATATCTAAATTACCCATGTCTACAATTACAAA  
AGATATTTAAATATACCTTTTGATTTTTATATATGACCCACCTTTATCATTATGAAATACTCCTTGCAGAAAAGAATGCAACTAC  
GGGTTGCATGCCAGCATGAATGGTTACGTTTGACCAAATGTCTAGTAAATACTATTTCATATTTGTTGTCTCCAAAAATAATTAT  
TATGAAAATACATTTTCATAGTTAATCTAATGATATTTATTTGATATCATAAATATTGATACCTTTTTTATCTATAATTGATCGAECTTA  
GGATACTAAACCATGACACTGTGCTAGAATTGTATTCTTTTCATGGACGGAGGCGAGTATAAAGCAAGTTAAACTCCTAAGTTTG  
CATTGAACCTACCCGTATATGTTGTTGTGAAGATAATATAAAATATTACTTTTATATTTCTATCTACCTCATCCATTATAAAAAAC  
TAACCCAAAATATATCTCAAATCTACATGTAATACTTATGTATATTATTAATAAATGAATATCCATAAATTGTGATACATATATG  
TATTTCTAAATCAATGAATTATGCAACACTAAAATTAATAACCATATATATGTTCTACCGTGTATTCCCTCTGTCCCAAAAT  
ACTTGACCTTATAGGTGTGGGCATGGAATTTTTTAAGAATGAAAAAGGTGTGGTTCACAGAAAACAACAAGGGAAAAAGAT  
AGAAATAGAGATGTACTGAGAAAAGAGAAAAATGTATTAAAAAAGGAGAAAAGGTGCATCGAGTGTCTGAAGCTCAAATATG  
TTGGGACAAAAATTTGAAAGCGATAAGTTCAAGTATTTTGAGACGGAGGGAATATATCAAATAACATGTATACATTAGAACAAA  
TATTTATTTTAATAACTTACTGTGCCCCCTCATTTTGATTTAGACCCGTCCATCTTCTCCTTGAGGAAGGCGTGTCTGCGCGTC  
CCCATCGCGCGCTTGGTCTCCTCCTCAAGCTCCTTGGCAGTACCGGTTGTGCTGCAACTTCGCTTGGCCCGCAGCTGAGCCCTG  
TACGCAGGATCTTGTGCGGTGTGAATCTCTTAGCCTCTTGTGCTCGGGCTTGCACGTTTCGAACCCCTCCTCTATTAGTACTTAT  
TTCTAAAAAGAAAAAGTGGATGCTTATTTCTGAAAAGAAAAAGTGCATGATATTCATACTACATATCATCACTTGTCTTGTAGT  
CTTGTGTAGAGTCAAATGCATGATACTATACATCATCACATGCAAATACAAAGTTTGGGCAATGATCCTCTCCATCGACTTC  
AAGCTTTTGAGCTTTTGGTGTGGAGGAGCTCTCATTTCAATTAATTTGCTGTGGCATTCTACTCCTCAACAAACATTATTTGG  
AAAAACATGTCTAGTACATGAGAAAGCTGTGATATAATGCCATTACCCTACTTTGATCAAATAATTTATTTGTCTATTTTAA  
AAAATGTGCTGAATAAGCTGTCCAAATTTGTCTGCAAGCTCCTTTTGTGTACATCAGGCGCATAAAAAACCCTGGGGCATTTG  
TACTTAGGTCAAATGATTCACATCATATTTTAGGAAACGTTGTGACTGAGCTGTCCAAATTGACTGCGAAGCTCCTCAATTTG  
TACATCAGGCGCATAGAAAAGCTCCTTTGTGACTCTTTGCGGCAAGATGTTGAATGGTCTATTGTCTGAAGAAGCAGAGG  
GTCACAGGCACAAGATAACACCATCCATTATGAAGTGTGAAGTCAGATTATACAGTGAATAGGCA

>SsLRR-RLK319

GAAGACGACCGCGCGCGGCCACCATTGCGCGGACGAGAAAACTCGCCGCTGCGAGTGAAAATGGCACTAGAGGCCA  
TGGATTGGCACGGGATCTCACAGGAAGGAAGAGGAGATCAATGGGGTTCTCACCGACGTGAATACGGAGGCGAGAGATGG  
CTCACGGGCAAGAAATGGCAGACGGCGATCCCCGTGAAAGTCCGGTGTGCGGCATGTGAGCATCGCAAAGAGCCAGAGAGAG  
GGAAAAACAGTGTGGGCGACTCCGTACCACGTGAAGACGACCGGTGACGAGTCAATTCGGCGCGCAGCTGAGCCGCGG  
CGGAACCCGAGCTGGCGGCGCGAGTTAGGATTGCGGCGGCTGCGAGCTCGTCTGGTGGCGTTGAGATGGGAAAGGGGGTG  
CGCAGGGGGGTGTGGTGAGCTTTATAGCGTTGATTGGCGTGAAAAACGGGCGCAATTGCGGAGAGAACGGGAACGGGCGC  
GAGACGCTGTGCGGCGGCGTCCGGATGAGAGCGAGCTCCTCCGTTTTCGTGCGACGTTGGCGCTGTGGATGAGGCTGCTG  
CTGCGGAAGGATAAGGGCGGCGGAGCAGAGGGTGACAGGTTTGTATCTTGCACTCCATCCAAAAAATAATGCAATTTTA  
GGTTAAGAACAAGTCAAATAAATTTAAGTTTGATTAAATTTATAAAAAAATAGTACCAACATTATATCTTCAAATAGATTTA  
CTATAAAATATGTTATATAATTAATCTACTATAATGCTTATTCGATATCAGAAAGTTACTGTATTATATAATTTGGTTAAACTTGA  
AATATTTTGACTTCTAAAAAGAGATTACATTGTTTCTAGGACCGGAGTAGAAAAGTTACACATGCACTGAATGCTTGTGAT  
TTTATGTGCGGATGGCAACCCAGTTAAGATGAACCGAATTTTTTTGGATACCTGAGATTTAAGATGAACATAAAGAACCAATTA  
GTTCTGCTTAGTCTAACTGAATGGCCTGGAACTTGGTGTCTACTGTGAGTTAAAAAATGGGAGAAATCATTCCGGGCTAG  
TAGGTCTTTGGTCTAATGCATGAGTCTGTTCCAAAGCTTTGTGATTTGACCGAGACTTTCTTTTTGACTGTTTGAATAT  
CACATTTTCTTTGTTTGGATCCTCGTCTGTAACTCTATGCCAGGCAACCGGATGCTTATTTCTAAATGAAAAGGTGCATGA  
TACTAGACATCATCACTTGTCTTTATAGTCTTCTAGATTGGTCAAATGCATGATACTCAGTGAACATAAAGTATGGGCAAA  
TGTGGTTGTTCAATTTCTCACTCGTTTTGATATTTTCTCTCCTTTCCACTCTGTAGATTTCAAATCCTCTCCATCGACTTCA  
AGCTTTGAGATGACTGGTGTGGAGGAGCTCTGTGATCACTGTTTGTGCTATGGCAATTTTACTCCCAACAACATTATTGTG  
AAAAGAACATGACTAGTACATGAGATAGCAGTGATATAGTGCTTATAGCACTACTTTGATCAAATAATGTATTGTCTATGTTT  
TTAGGAACGTGTTGAATAAGCTGTCCAAATTTGGCTCCAAGCTCCTTTATTTTGTGTACATCAGGCGCATAGAAAATCTGGGCC  
ATTTCTACATTTGTCAAATAATTCACTTATCATACTTTTCAGGAACAGTGTGACTGAGCTGTCCAAATTTGTCTGCAAGCTCCTTT  
ATTTGTACATCAGACGCAATATAAAAGCTCCTTTATTTCTGAAGAAGCAGAGGGTGACAGGCTTGATCATGTGGTGAATA  
CACATGCACAAGATAAACCATCCATTATAAACTGTGAAGTCAGATTATACAGTGCAATAGACATGGAGCTCTATATAACCTC  
ATCATATACGGTTAGCCCAAGCCCAAGGCAGCAGGATGATCTACACATCCATCCATCCATATATGCATAAAACAATGTCTCAC  
ATAGCCATTACAGCAT

>SsLRR-RLK344

TGATTTGTTGTGAGAGAAAAACACTGTTCCGCTGAAAAACAAGCTGAAAAATACGGATTATAAGCCGGATGAACGGGGC  
CAGAGTTACCATGTTTCTTGTAGTGGAATTTCCCACTGTTCCATTCAATGATCAAGAGTTTATAAAGGAGTTACATGACTC  
TTCCATGTCTAAGACTCTTCACTCTAGACTCTTCCACTACTTCCACTCTTCACTCTAGACTCCACAAATCTAGGCTATTTCATAT  
TCTAATACCCCTCCCGCAGTCTCAACTGGGAGATGATCGAACATTGATACTGGATCGAAAGTTGAGGAAGACAGCAGTTAGTA  
ATCCCTTAGTAAATATGTCGGCATATTGAAGGGATGTAGGAACATGTAGAACCCGCACAGCGCCAAGGGCCACACGCTCCCG  
AACAAAATGGATATCGATTCCACGTGTTTGGTCTTTGGTGATGAATGGGTTTGTGACAAATACACGGCACTGATGTTGT  
CACAAATAGACAAGAGTAGACGTGGTATAGGATGATGAAGCTCGCCCAAGAGTTGACGAATCCAACAAGCCTCAGCCACGG  
CATTGGCAACAACCCGTGATTCCGGCCTCAGCACTGGACCGTGAGACAGTGCCTTGGCGCTTTGGCAATGCTGAGAGAAGGG  
GTAAGGTAATTGGATTGGAACCATGTTTCATTCAATAGAACACAAAGAGATCTTAATACCAGTTTGAAGCTTTTGAAGGTCC  
ACATGTAGAGTCAACCTTTTTCTTCTTATAGTTGTGTTATCTTCTTATGTTGGAGACTTCTTGTTGTGATTCCCAAGTTTGT  
ACTATGTTATCAAAGAATGTAATTAGAAATCAGCACAAGTTAAATGTTTGGAGTAGAGAACTGAACATGGCCTTTGCGCGAT  
GAACCATGGCCAGGGAGGGCCGCCCTTAACCTCTGCTCAACAAACCGCAGCTTGGGGAGGGGGCTGTGGCTGTGCAC  
CAAGAGCCACCACTGCGGCTGGCAAGGATGCCGTGCCACCTTCGCCACGCCGCGGGCTGGCCGGAGCACCAGCCCGCGA  
GCCTGCACCCCGCGCGACCGCGCGGCTGGCTTACTGGGTGAGGCCGCCACCGCCAGAGGACACGCGTAGCTGTG  
TGCTGGGCACCGCCAGCCGTGGGATCCTCGGCTCCATCATCTCTCCTCCTTCCATCGATCTAGGGTAGGTTTTTTTCCGAG  
GAAGGTCACGGGTGGACTCGGCCGCTCTGGGAAGAAGGTGATGGGAGTGGGGTGAAAAATTTGGATGCATGAGTAACAG  
AGGGGTATGTTGGTCATGCGGAGAAAAAAGTGGCAGGTGAAACAGTCAACCAATAGATGGTGGTCAAAATGGACAGCA  
GTGCCGTATAGAGCAGAAAAAGCTCATGTGATGCTGAGTTGTGCAAAACAGGAACTTAATGATGTAGCCAGGAAATTGCC  
CCAGTAGGCAGCAGCCTTGATAATCCCTGCAGAGGAAAAAGTCAGCACAATATGGAACATGTGCAGCATACACGCTCAGC  
CAGTCAGCCCTCTGGGTTGTACGTAAAGAGAAAAAGTCAGCAAGAACAATAAAGGACGATATCATCATAACCGAATTCCGC  
GGTTGGTTTCACTGATGCTCATCATCATCATCTACTGTGTTTGAATTGGCTGGTATGTGAATGACCAAGGAAAGAAA  
AATGGTCAAACAATGGACACCAAGAACAGTCTAGCTTTAGTCAGCTACTCATGTGGCAAAAGTCACTCAGAGAAGTCTACG  
CACGTAATGATCATGATTATGATCGCTGTCAAGACAAGTGTACGACGCTGCCTAAATTTGAAGACTTCTTGCAGGACTGTTTCG  
GCACAACTGTAAACAGAGCAGCAGACCATGCATGCTCTCTGTTGTACTAATCAGCACTCAGCAGTGGCAGCTT  
CCCGCAGCAACACCCCTTATAAGCCTGCACATGCCG

>SsLRR-RLK378

TTTTTTGAAATTGCTGATTATAATTGTCTTTCAGTACTTTAAATATCAGGACAAACCACAATCAGCTACTTCACTGCAACTTTC

GCAACTTTTGCAGCACTCGCAGTTTTTCCTGCACAGGCGCGCGGAAGCGCGCGCCCCGCCACTAGTTAATAATACTTTGATG  
CGACTAAGAATGCCAACGAAAGTAAACACTTCACAACCCTACGCTTGCCGCTCTGCGGCAATAAGACTTATTTTGAAAAA  
ACAAAAAAGAGTTTGTCTTTTTCATTTGAGTGAAAAAGAAAAACAAGAACAAAGAATAGATTGAACCTGTGCTTGGCTTTGTT  
GATTGGTCCGATTTTATACACGGCGAATCGTCGCCTCAAAAGAACGACCGACGTCTCACGTCCCTTAGGGAGATGGGATCAA  
CACTCTCCTATTGGTGCATCTTGCTGATGTTGGAGTAGAAGAACGTAATCAACAATCAAAAAAGAGCACATCAACGTACCAA  
AACTTTCTCCCCACCCACCCACCCACCCCAACCCCAATATTGATTCAAATTGAAACCTTACACCTCATACTAGAAAC  
CATGGCGACTCTGCATTCCATGGTGACCTGCTGCTGCTAGTGCTCCTACTCACAGCCCGCCGGCGTCTTCCCTCCTCTTTA  
TCAGCAGGTACGAATACCATGATCATGAAGCACTGCTGGCACTCAAAGAGGCGCTGACAAACAACCTCGGGATTACTAAGCT  
CATGGAACAGCAGCAGCTCCGACTTCTGCCGTTGGACCGGCGTGACATGCAGCCGCGGCGATCCGGGACGGGTGGTTTCTC  
TGAACCTGCGCCAGAAAAACCTGGGAGGCAGCATCTCTCCTGTTATCGGCAACCTCACCTTTCTCGGTGATCGATCTCTT  
CGACAACACGCTGTCAGGGGAGATACCGCGCACCATCAGCCGGCTGCGTCTGCTGAGCTTTCTTGAGCTGGCGTACAACAT  
CTTGCTGGTGAGATTCTGCAGACCTGGCCAACTGTTCCAACCTTGTGTTCTAAGCGTAGAGGTCAATGAGCTTCATGGGG  
CAATCCCTAGTGGTCTGGGCTTGCTATCTCAGCTGCGAGTCTCTATGTTGGCGAGAATAATCTCATAGGACATATACCGCAAT  
CACTCGGCAATCTCTCGGTACTCCAAGGCTATACCTCTATCAGAACAAACTGGAAGGAACCATCCGAGGGGTCTTCCCG  
TTTGAGGTATCTCCGACACATCCAGGCGGCAAGGAACAGCCTCTCTGGCACAAATTCCACCTCACTTCTTCAACATATCGTCTC  
TCCAATATCTTGGTTTCAGTTCAAATAAGCTGCATGGTAGATTGCCACCAGATGCAGGCAGGCACCTGCCTGACCTTGAAGT  
GCTCTTGTGGGTGGCATTTGGGAACAACTTTCTGGAACCTCAGCTTCCCTCTCAAATGCCACTAAATTAACAAGAGCTG  
GGTCTTGCTCATAACAGCTTCGAAGGAAGGGTGCCTCTGAGATAGGGAAGCTCTGCCTAGAGAGTGTGAAATGGGGTCT  
AACATGCTGCAAGCTGAGAACGATGCGGATTGGGAGTTCCTTAGATAITTCACCAACTGCACCCGCTAGAGGGCTTAGATG  
TTAGTGACAACATCCTTGGAGGAGTGCTTCCAGGTTTTGTAGCTAATTTCTCTGGGCCAGTAAAGTCGCTAATCATGGCAAA  
GAACCGGATGCTGGAGTAATCCCTCTGGGTATTGGAAACCTTGTACCTTGAAGACCTAGAATTCGCGGAAATCATCTG  
CATGGTGTATACCTGAGGATATTGGAAGACTTCAGAACCTGAAATTTTTCACGCTGGAGGAGAATCTCCTATCAGGAGGTAT  
ACCGGCTCCTTTGGCAACCTCACACAACCTGCTACCCCTTATATTGTCAAACAATGAGCTCAATGGCTCCATTCTGAGAAC  
CTTGGGAGCTTGCACAGGTAAACATCCA

>SsLRR-RLK315

CGCTGAAAAAAGACTAAAAAACAAAAGACCCTTAACAAGACTAATGAGCTTCTCCCTGGATGCGGAGTAGGAGTGAAGGC  
TAAACGGTAGCTGTAATCTCATCTTTACATAGCACAGCAACTGTCTTGGGGTGGGTGCTTCTGTGAAATGTTCTCCTGT  
TCCTTCTTTCCAAATGTTCCACCAAAGTAGTCAAGGCCCATCAAAATTGCATTTCTGATTCTGTAGAAATTTACTCTAC  
ACCGTGCTAAAATTTATACAGTGATCTGTTGAGTTGATTGTGTTCAATACCGAGATGCCGAGCCATTGCTTAATTATCTCCT  
AGACTTACTTGGTGAAGGGACAGTCTTTGCAAAAGGTGTGAAGTGTTCAGGGCTGCTACCGCAAAGTTTGAAGTTGGAT  
CATTAGGTGATTAGATTGTTGGGTAGGATTTTGTGAACTGATCAAAAGTCCATGCGAAGAAACGACATCTCGGTTCTACTT  
TGGCTTTCCAAATCGGGCAAAGATTGATTTGTGTAACCTTCTTCAAATTGGATTTCGTATACACTCCTTGTGTATATTCTC  
CATCAGCTGTCCAGCGCTAGTGATAATATCTCCCTCGAGGGGTCTGCTGGACTTCCTTTATTGCCTCTCACAGGTTCCACA  
TATTTCTAACACCTTCTTTGAGACAACAGGGGGCATATATGGTCAATCCATCGATTGTTTTCTAAAGCTTTGTGCACCGTAAATC  
TTCTTCTTCTTGTCTTTTGGAAATAGGGAAGGTGCAATTATTTTCGCCCAAGATCCGTTGAGCCAACCTGGAAGTCCAGAAAA  
GGGCTGTTTTTCCATTACGAACGAAACTAAAGTTGACGCATTGAAGAGATCATGGTCAGACTTATCACACGGGACGATATC  
CGGGTGTGTTCCAAGCCCTTCTTTTGCACCACTGAAACCAATCCACCCCTCATTTTAGGGAGACATGCAGTCTGGCCAGT  
TAATCAAGGAGTGCACCCCACTAACATTTCCGGTGTCTTCTCTGCAAAAGGAAGGGGCTGACGACCCGATCTGTGCGAT  
TAGTGGTTGAACCTTCAATCTTTCGAAGTTTCCGAGTGTGGAGGGGAGCCCTAAGTATTTGCCTAGGAAGCTGCTGATTTTA  
CCCCGGAAGTTCTGGATGAGGGGCGAGACCATGCTATCTGTAGTCTTATTGGGAACATTTCTGTATTTGACATATTAATTGAG  
CCCCGAACATCCGCCAAAGAAGTGCAAGATTTTGTAAAGCATTGAGTTCCACGGGTGATGGATTGCAAAATACGGCTGTA  
TTATCCGATACAGGGAACATCCGAGATTGCTGCTTTTGGAGAATCGGTTGCAAGACAACCTGTTGCGCTGCCGTGTTCAAT  
GATGCGCTGAAGCGAATCTGTAGCAATGATGAAGAGCAGCGCGATAGTGGGTACCTTGTGTAACCCATGGACATGCTTA  
TAATTTGTTTACTCGGTCTCCCATTTGATGAGGATTTTGGAAAGCTGGAACCTGAGGACTGGGAGTCTGCGCAGACTGCAC  
ATGAGTAACTACATCCAGTGACGAGGTGGATGTTTTCTTCTTATTGTCATGGAGCCATGGACCCGTCAAATGGGAAGT  
AACTTAATACAGAAAAAGGAGATACATAGCGTGAACATACGGGCAGCGTCGAACGCTATTACAAAATACAAATATAAAGCC  
TACCAAGATGGACTCCTAAGATTGACTACCGAAAAAGAGGTCTTTGTCTAAAAAAGAGGTCTTTGCACATGACTT  
GGAGTCTTGGACTGATAGATGTGTATACCAAGGCAACTCCGTAGATTATCAGCTCACTAGTAAAAAGGTGCCCACTATTAGCA  
GGCAAGCAAAAAAGAGATATCCACCATTTGACACTCCACAGCTGAAAGCATGAGCACTCTGCATGCTCTAGTCTGTATGCTC  
CTGCTCCATTCTATGTGCAGG

>SsLRR-RLK14

ATTGTTACTCGATGTTTCAACTCTGTGATGAGCATAGCTCCAGATGCTCTGCAGTTGATGAAACCGATAAGCACAGATCCTTT  
CTTTTACCAAGAAATAGTACTGAAGAAAAGGTAAATTTATTTCTTTCTGTCAGTATGTGGTTTTCAGTTTAGTCCAAAGTAC  
AACAGTTTAAAGCTGAGGAATATAACATTTTATTCAAACTCAGAAATACTATTGTATTTTGAAGCTAGGAAATTTTGCTCTGTT  
TTGTACATATGCTGAAATTTGTGCCTTTTCTCCCTTTTTTATAGTCTGTTGGATTGTTGTACCATATAGAAGATGTCAAAATCA  
TACAATTTCTATCTGTTGATGCCCTCGGTGGTTTTGATGATGCAAGTAAAGCTGCTATACTCTTATACATGTTGCTCAATTTCT  
TGGATAAAAGTTTCCACCTTAACGCAAATTAAGTAAACCAGGCTGTGGAGAAGAAGTTCCGAAATCGTGTGAAGAGGTCTG  
TGGGCTATGGTGTGTGTAGAGTTCGGTGAAATTTGGTACATATATTATGACATGTACTGGGACGAGAAACAGGGGTGGAA  
GCCACCCCTCCAGAGACTAGGGAACAGGACCATCCACCTTGGTCTAGCTGCTGACAAGAAGGTGCAAGAAAGATTGTA  
ATGATGAAGATGTGAGATCTTGTAAACCAAGCAAGATAGATTACATGCTACAGGTTTACCTGGGTACCGGAGCAGCTGCT  
CCTTTTGTGGTGGTCCAAATCGATTCTTACGGCAATTTGTGCTTCGTAGAAAAATGTCGACCGGCTTGTAGTTCTGTCTCT  
TCCATAGAGTGATTCACCTTTGGATTAGTGGCAGCCCTTGTTCGAGCTCATCGGTTGAAGCTTGGGGCTCAATGATTTAGT  
TGGAGGCAACATTTAGATCATGACTTAGTTCCCTTTTCTTATGTTTTTGCATCATGTTCAATAGTTGATACAGGCATCAGCTCCA  
AAGGAGAAAAAGGCCATTGTTGTTAAATGTTGTGGAACCTCGGCTGTCAGCTGCTGCAATAGGAAGCTGTTCAACTTATCTG  
GCTGCTGATACATAGGCATCTCTCGTAATTGTTGTGCAAACTTGTCTTAATTTTCTTACACAATCAATCAGAACAGATTTT  
GACCCTTAATTTTCTTACAATACGTTTACATTTGTGTAACCAATCAATATTATCGTAGAGGCAGTTTGAATACAAATGTTTTG  
ATGTAATTTTCTGTTTTAGTTTTATATATAAATTTGAACAAATGTTGTGATCAAAAGTTTGCAAAAAATTTCTGTAGAAGATAG  
ATTACCATTCCGAGATGACAGATATAACATGGCCAAACTGCTTGCAGCTGAAGCGAGCCCCGCGGGTCGCACTGTTGCTCTG  
CATTCCAGTTACCGTGACCTGGTCAATGACATTCAGGTAAGGATGAAAAACGGTACGGATATTTTTCGAACGTATTCGAGACC  
GAATTCGTTTAGAGAAGTTCAGATCTGTCCATATCCGAGTCCAAATTTAATCATCCGATACCGGATTCGTATCTGAATACTAA  
ATCTCATATTTATATATCGACATCGAATCGTATCCTATCCGATATGGCTGACACTATCCGATTCGAATCTGAATCCAATCAGAA  
ATATGAAAACAATGTAATATTGGTGATATCTATCGTATCCGATCCGTTTTCATCCTGCGTACAGGCCGCGAACGAGCCGGAA  
AGTGACGTCCATCGTATACATGCACTGCTCCAGGTGATGTTTGTGCGAAAAAGTCCACTCCTGTCTCGATCCTTCGCCGTGC  
AGCAGCCGAGGGCCGCTAGCACGAGTCAAGGTGGTGGAAGCACTATTGACGGCGTCTGCGCCACAACGGAATTTGATCGA  
AACAGTCGGGCACCGTCTGGCATCTGCGTCTGTCTATAAGTAGTAGCTGTTGTTAGTACATTCCAAGCTCCAAAGCAACGGC  
CTGCC

>SsLRR-RLK62

AAATTCGTTACTCAATGTTTCAACTCTGTGATGAGCATAGCTCCAGATGCTCTGCAGTTGATGAAACCGATAAGCACAGACCC  
TTCTTTTACCAAGAAATAGTACTGAAGAAAAGGTAAATTTGTTATTTCTTTTCATGCAGTATGTGGTTTTCAGTTTAGTCCAAAGTA  
CAACAGTTTAAAGCTGAGGAATATAACATTTTATTCAAACTCAGAAATACTATTGTATTTTGAAGCTAGGAAATTTTGCTCTGTT

CTTTGTACATATGCTGAAATTGTGCCTTTTCTCCCTTTTTTAATAGCTGTTGGATTGTTGTACACCATATAAGGATGTCAAAATC  
ATACAATTCTCATCTATGGTTGATGCCTTCGGTGGTTTTGCTGATGCAGTAAGCTGCTATACTCTTATGCATGTTGCCTAAATTTT  
CTGGATAAAAAGTTTCCACCTTAACGCAAAATTAAGTAAACAGGGCTGTGGAGAAAGAGTTCCGAAATCGTGTGAAGAGGTCT  
GTGGGCTATGGTGTCTGTGTAGAGTTCCGTGAAATTTGGTACATATATTATGACATGTAAGTGGGACGAGAAACAGGGGTGGA  
AGCCACACCCTCCAGAGACTAGGGAACAGGACCATCCACCTTGGTCTAGTACTGCTGACAAGAGGTGCAAGAAAGATTGT  
AATGATGAAGATCTGAGATCTTGTAAACCAAGCAAGATAGATTACATGCTACAGGTTTACCTGGGTACCCGAGCAGCCTGC  
TCCTTTTTGTGTGGTCCCAATCGATTCTTCAGGCCAAATTTTGTGCTTCGTAGAAAAAATGTCGACCCGGCTTGTAGTTCTGTTT  
TTCCATAGAGTGATTACCTTTGGATTAGTGGCAGCCCTTGTTCGCAGCTCATCGGTTGAAGCTTGGAGCTCAATGATTTAG  
TTGGAGGCAACATTTAGATCATGACTTAGTTCCCTTTTCTTTAGTTTTTGCATCATGTTTCATAGTTGATACAGGCATCAGCTCC  
AAAGGAGAAAAAGGCCATTGTTGTTAAATGTTGTGAAAAACTCGGCTGTCAGCTGCTGCAATAGGAAGCTGTTCAACTTATCT  
GGCTGCTGATACATAGGCATCTCTCGTAATTGTTGTGCAAAACATTGCTTAATTTTTCTTACACAATCAATCAGAACAGATTTT  
TGACCCTTAATTTTTCTTACAATACGTTTACATTGCTAAAAAATCAATATTATCGTAGAGGCAGTTTGAATACAAATGTTTTT  
GATGTAAATTTCTAGTTTTAGTTTTATATATAATTTGAACAATTGTTGATCAAAGTTTGCAAAAAAAAATTTCTGTAGAAGATAT  
GATTACCATTCCGAGATGACAGATATAACATGGCCAAACTGCTTGCAGCTGAAGCGAGCCCGGGTGGCAGCTGTTGTCT  
TGGATTCCAGTTACCGTGACCTGGTCAATGACATACAGGTAAGGATGAAACCGGTACGGATATTTTTCGAACGTATTTCGAGA  
CCGAATTCGTTTAGAGAAGTTTCAGATCTGTCCATATCCGAGTCCAAATATTTAACATCCGATACCGTATTCGTATCCGAATACT  
CAAATCTCATATTATATATCGACATCGAATCGTATCCTATCCGATATGGTGACACTATCCGTATTTCCCAACGTATGGCAATCA  
GAAATATGAAAACAAATGTAATATCGGTCTTATCGTATCCGATCCCTTTTATCCTGCGTACAGGCCGGAACGAGCCGGAAAA  
GTGACGTCCATCGTATACATGCACTGCTCCAGGTCATGCTTTAGTCGCAAAAAGTCCACTCCTGTCTCGATCCTTCGCCGTGCA  
GCAGCCGAGGCCGCTAGCACGAGTCAAGGTGGTGAAGACTCATTGACGGCGTCGTCGCCACAACGGCAATTGATCGAA  
ACAGTCGGGCACCGCTCTGGCATCTGCGTCGTGCTATAAGTAGTAGCTGTTGTTAGTACATTCCAAGCTCCAAGCAACCGGCC  
TGCCA

>SsLRRL-RLK179

GCATCTTTTGTCTATTAACTCCTTTTTTCGCATGCTTCATATTTTCTCTGGCTGTGTCATATTTAATTAGTACTTTCTCGTCATTG  
GCAACTTGGACTTGTACTTGGCCGTTCCAGTTATGTGTAGGACATGTTGTAGAATTCTATCTACGTCTCTTAATTGTTCTCTG  
TAATAGTTTCATGCTACAGTTTTCTTGCAGGAATTCATTATATTGACAAATATTGCAATTTATAGAAATTATATCAGTTACAATCA  
GACGATGCCTACAGTTTTCTTGCAGGAATTCAATACTATCCCATGTTTCATAAATAGTTTCACTCTTCATTGACATCTTGCTTCGAT  
GCTATCAACAGAGGATGCTGGGAAGAGCACATGGTGACATCAACAATGTCCTATATCTTGTATGTCAGTGTGCTGATGTCATAT  
CGCAATTCACAAGGGGCCATATCTTGGGCTAAAGGAAATCCTCACTCATCAGCAAAATAATCATTGGCATTATTATTATTATTATT  
GTATCCCAGAAAGGTTTGTCTGTGCACTTGTGATATCAGAATATGCTTATCTGATTATAGTACAATTTTATGTAAGTTTATCAT  
GCTTGTACTCTGAGAGGCATGTGAAATATATCTTTTGTCTATCTGTTATGTGTGCTGTCTAGTTGTTCCCAACGTATGGAGTTAT  
GGACACGTAAACTGCGGATAAAATTATGTTTTTATATCTTCCATAGAATCTGGAAAAACGCTGAATTAATACTGCTGGTTTCAGA  
CGGCAACAGTTACAAACTGAACTGTTGGTACAATCACTTAACTACTTAAAGTACTCCATTTTGGCATACCTCTGCTTAACTT  
GTGCCTCTGTTTTCTCTGTGAAATTTATAGATCATACGTTGCTGGCTAGTGGCTACTCAGGATCTCATCTAGTACTGACACA  
GTTGTGTTTTGGCCACATCCACGCTGCCATTCTTAATCTATTCTCAGGTAAGCTATATTGTCTTTTGTCTTTTGTCTTTGCTGCTCTA  
GAGTACTGACTACCGGCCACCGGCCACTTCTCTTTGCTTTTTTGTGACCGTATTTTCTTGTGATTGTTTTGATTTTTATAGATAT  
CCTTATGTGAGAAATTAATCTCTTATAAAGATGATAGTTCTGTTTGCAGTTTTTGAATAAGTTGTGTTTATGATGAGTAATAT  
GGTGTCTTCTTGTCTTCTTCTAGTCGAATTGCACTGATAAATCTGAAAGTAGGAATATTTCTAGGACAATAGTGGTTATGAGAGAT  
AATTATACATCCAACTAACTTTTAAAGTTTATACAAAAGATCGCACTGTAACTACACATCTGTCTGTGTACACACACACACA  
CACACCGCTCAGGTACCAAGAAAGGTGCAAAATCGACCAGAAACAGATAAAATAAAACCACCACGTTTATAGCTGCTGGCATCT  
GTATGTTTCAGTAAGTTTCAGAAATCCCAACAGAAATCAATTAGTTTGTCTAAGGAAACAGAAAAAGAAAACTGAACTTAGCTTT  
GCTATGTACGCTCCCAATTGCTAGAGCAGAAATTGGTAATCTGTGTAATATAACTGAATCGAAGGTGTCTCAGATTAGGAAC  
AAAACCTGTTTCGCTAATGATCCACAGGTTGGAACATGTTTCTAATCTACTAGTTGAAAAAAATCTCCAGAAACTGGCAAAGC  
CGAAAAACAACTTGGAAAGGCCATGTGAAAGTCAAAGATTGAAGGAAGCATCGTGCAGCGACGCTGACAGGACACCAAGCA  
TCAGATGCGATGCAATTTGATGCTGCATGCAATTATTAGCACGCGTCCATCAGGATTAAAAAACACAGCAAGTTGCTCCCTGTC  
TCTGACCAGGAAAGGCGTGCCCTTTTTTTTCAATAAATATAGGCCAAGAAAGGCCTTTTTTTTTTTTGTGACAACAGGCCAAGAAGG  
CCTTTGTTTGGCTTTGGCAGCCAACAGACTTTTATTGGCTACTCTTACTCGTACTCCACGCTCCAGCCCATCTCCACC

>SsLRRL-RLK192

TGGGCATCTTTTGTCTATTAACTCCTTTTTTCGCATGCTTCATATTTTCTCTGGCTGTGTCATATTTAATTAGTACTTTCTCGTCA  
TTGGCAACTTGGACTTGTACTTGGCCGTTCCAGTTATGTGTAGGACATGTTGTAGAATTCTATCTACGTCTCTTAATTGTTCT  
CTGTAATAGTTTCATGCTACAGTTTTCTTGCAGGAATTCATTATTATTGACAAATATTGCAATTTATAGAAATTATATCAGTTACAA  
TCAGACGATGCTTACAGGATGCTGGGAAGAGCACATGGTGACATCACAATGTCCTATATCTTGTATGTCAGTGTCACTGTGCT  
CGATGCTATCAACAGAGGATGCTGGGAAGAGCACATGGTGACATCACAATGTCCTATATCTTGTATGTCAGTGTCACTGTGCT  
ATATCGCAATTCACAAGGGGCCATATCTTGGGCTAAAGGAAATCCTCACTCATCAGCAAAATAATCATTGGCATTATTATTATTAT  
TGATCCCAGAAAGGTTTGTGTGCACTTGTGATATCAGAATATGCTTATCTGATTATAGTACAATTTTATGTAAGTTTATGTA  
TGCTTGTACTCTGAGAGGCATGTGAAATATATCTTTTGTCTGTTATGTGTGCTGTCTAGTTGTTCCCAACGTATGTTTGTGCT  
ATGGACACGTAAACTGCGGATAAAATTATGTTTTTATATCTTCCATAGAATCTGGAAAAACGCTGAATTAATACTGCTGGTTTCA  
GACGGCAACAGTTACAAACTGAACTGTTGGTACAATCACTTAACTACTTAAAGTACTCCATTTTGGCATACCTCTGCTTAACT  
TTGTGCTCTGTTTTCTTCTGTGAAATTTATAGATCATACGTTGCTGGCTAGTGGCTACTCAGGATCTCATCTAGTACTGACA  
CAGTTGTGTTTGGCCACATCCACGCTGCCATTCCATACTATTCTCAGGTAAGGCTATTTATGCTTTTTGTGCAATTTGCTGCTC  
TAGAGTACTGACTACCGGCCACCGGCCACTTCTCTTGTCTTTTGTGACCGTATTTTCTTGTGATTGTTTTGATTTTTATAGAT  
ATCCTTATGTGAGAAATTAATCTTCTTATAAAGATGATAGTTCTGTTGCAAGTTTGTGAAATAGTTGTGTTTCATGAGTAGGAATA  
ATGGTGTCTTTTGTCTTCTTAGTCGAATTGCACTGATAAATCTTCAAGTAGGAATATTCTAGGACAATAGTGGTTTATGAGAG  
ATAATTATACATCCAACTAACTTTTAAAGTTTATACAAAGAAATCGCACTGTAACTACACATCTGTCTGTGTACACACACACAC  
ACACACCGCTCAGGTACCAAGAAAGGTGCAAAATCGACCAGAAACAGATAAAATAAAACCACCACGTTTATAGCTGCTGGCATC  
TGTATGTTTCAGTAAGTTTCAGAAATCCCAACAGAAATCAATTAGTTTGTCTAAGAAAAACAGAAAAAGAAAACTGAACTTAGCTTT  
GCCATGTGAGCTCCCAATTGCTAGAGCAGAAATTGGGTAATCTGTGAATATAACTGAATCGAAGGTGTCTCAGATTAGGAAC  
AAAACCTGTTTCGCTAATGATCCACAGGTTGGAACATGTTTCTAATCTACTAGTTGAAAAAAATCTCCAGAAACTGGCAAAGC  
CGAAAAACAACTTGGAAAGGCCATGTGAAAGTCAAAGATTGAAGGAAGCATCGTGCAGCGACGCTGACAGGACACCAAGCA  
TCAGATGCGATGCAATTTGATGCTGCATGCAATTATTAGCACGCGTCCATCAGGATTAAAAAACACAGCAAGTTGCTCCCTGTC  
TCTGACCAGGAAAGGCGTGCCCTTTTTTTTCAATAAATATAGGCCAAGAAAGGCCTTTTTTTTTTTTGTGACAACAGGCCAAGAAGG  
CCTTTGTTTGGCTTTGGCAGCCAACAGACTTTTATTGGCTACTCTTACTCGTACTCCACGCTCCAGCCCATCTCCACC

>SsLRRL-RLK314

CAGATAGGGTCCACTGCAACATGTGTAACACGAATTTTTTTTGAACATCTAGAGGAACACATTTGCAACGTATGATCGAAA  
CAGTTAAACACTTGAACATACGCTGTGAAACATGAAGGAAACACATGTGTAGCCATTGCAAAAACATATGCAACATCTAGATG  
AAACACTTGAACAAATGTGTGAAAAACATAGGCAACATTTGGGATGAAACACTTGAACATAAGTTGTAACCATATGCAACA  
ACACGATGCAACATCCGTCTAAAAACAACCTTAAACATTTGGAACAGATGTTTGAACATACGTATGAAACCATGCAACATAT  
GCAACATCCCGATTTACTTTTTGAACATCCACATAAATCCACATAAATACTAGATTTACTTTTTGAACATCCACATAAGCGTAC  
TTCGCCATTTTGGGAGACTAGATTTCTTTTTTTTCTTTAGCAAAAGGTAGACTAGATTTCTATGGGCTTCGATGAATTGAAAA  
AAGGCCCACTCGTAACCCCGTAATCCACGTTTGGCTTCTGCGTGGTCCACTGCCCGTTATTTCCCTCTATTCTCATCTGT



CCGACCTTGAGCGACGGTGC GCGGTGCGCCGTGCGCCCGATGGTGGGCGGCGGCAGATGCGCCGGAGGCAGAGTTCAAGC  
AGCAAGTGGCGACGAGCAACGGAGGCGAAGCGCGAGGTGTATGCGCGGCGGAACGCCTGAGCGACTGAACAGGCTGAGA  
AGGCACGGGCACACGCGTGCACGGCAGTGTGGCATGGACAGCAGGAGCCGCGCTCGGCCCTACGCGCGCTGCACTGTGCGT  
CTGCGCGGGAGCAGGGTGGCCGCCGGCTGTGCTGCATGCGGCATGCCTGCACGGCAGAGGGCAGAGGGCAGAGGCACGG  
AGACTGGACTGGACAGGCAAGCATCACCGTCCCGTCCAAGTTCTAATCTGGTGTGTGATAATTAGATATTTGCATGCTTTAGC  
AATTGTGACGATTAATTATTGGTTTGGTTAAATAAAGCATGAAGTGTGCCAGTCCGCTACTCATGGAACAACACCTATTTCG  
TTGCTATAATTATGGTGATTGGTGATGCCAGGTCCAGGCATATGGTCTGTTCCATCGTAGTTCTTGCCCTTACAGTGTTT  
GACGAAATGCGTCTCCGGCCAGCGTCTCCAGCCATCCGAGTAGTTGCATCCTCTCCTGTGATCTGAGAAATTTCTACACTATA  
TATGCATCCTTTTTCTGTAGTTAGTTACTAATTTGTGTGCTTCAATTGCTTTAGAGTCTTACATTTTTCAATTGAAAAATATGGAAT  
GAAAAATAAATGTGGTACATCTTAGCGTTTGTCACCTAGTAGAAAAACCATGTGAAAGCTTAGTGGCATAGATGGTGACTTGG  
GTATTGCTGAAAGCACAGTTTCATATTTTCATCATAGTTTGAACCTTGACCCCCCTGGCTACGCTGACCTCTTCTGGTCACGGT  
CAAGATTACCCACTCACGGAAAAATAAAGGCGCATTAATTAGCCTAACCCTTCCGCGTAGACCAATATAATAAGAGTATTA  
TGGGAGGCAACAGAGATCAAAATTAAGAACACCACTGGTCTTATGTATTATATACTAGCAGCATTACCAAGAAAGCTGGA  
AGGTTACAATCAGCAGCATCGGGGCTGTAAAGACCATGAATCACTGGAGTAGTAGTCGTGGACTCGATGCACCGATACAGCT  
AAAAACATGCCATCTACGGAGAAAAAGTAGAGCAAGAAGAAATGAATGAAGAATCACACTAATTTTCAATAAAGTTGTTCTT  
GGTTAGTTCTCTGCACCATACTGCTTTGTAAAGGGCTTCTTTGTACAGATTTACTTTTTCAATAAAGTTTAGTTTCCATTAAAA  
AAAGAATCACATATTTACCTGCTCTCCACCATTAAGTTAAGTTAATTAACATAAAACCTCAACGACGACTGCCCTCGGCTAT  
CGCCACTACACACACTCGAAA

>SsLRR-RLK151

CCGCCCCCTCCGACCCTACTTCCGCAACGCGGTGTTCAAGCTATGCGTCAACGCGCGGCGGGGGAAATTGGCACGGTG  
GCGTTGGGATCCATCGCTGCCCGCATCAAGGGCACCGTTGAGCGGATGGATGACGAGCTGGTGCGGTCCGCTATTGACTACT  
TCGAGATGGCCGAGATGGACAAGAGACCGGCTTTGAGAGGGACCTTGCCACTGACGGACCTGCATATTACCAGTGGTTTCG  
GTAGGCCACAGTACGATGCAGATTTTGGGTGGGGAAGCCGCAATTCATGTGCGGGGCAGAGTCCGTCGCGGGCGGCTATG  
TGTACTTGATGAACGATGAGGGGACAACGAGCAGCGGTGAGTGACATGATATTTTGGCTGCTCGTGTGCTGATTTGAAGCT  
GTAAATATAAAGGAGCTAGGGCGGCTGCTTTATGCAAAGCTCTAGCAAGCTGCTAATACTACTGAGTACTAATAATAAGGTTT  
TGTAATAATATTAACAATAAGGTTTGTAACTAAGCTTAAGGGGAACGCGTGGTACCTCCTGTTTGATTATAGAGCTGTCTCGAT  
GCTAGAACCACAGTATCTATTAATACCTAGACATTATATAGAACTATGTTCTCAATGAACATGTTGTATAGAATAATTTT  
TTTGTCCAATCAGATTTTCTCTTTCTTTCTTTAATTGAAGTGGTGCATGATATATCTTTTGGCTTAGTTGATATCAAGCAA  
TATAGAAACAATCTAGTAGTATTCTAGTTTCTTGGTTGAGAGTGTCTTGTGATTTTAAAGGCAGTCAATGATTATAGGAGTA  
GTACTAAAAAAGCATGCATGTACCTATATAATAAGGTTTAAAGGCAGTCACGCATGAATGGTTGATCAATCCAAATAACTTAC  
AATTTTGAGAAATTGAGAGGCATTTTAAACCTTCAATACCTTATATTTTCAAGGACCAGACGAGTACTAATCGGGGAAAGTATCCA  
CTTCATTGAGCTTCGAGGCTTTCTGGCTAGGCCTTGCTTCCACGGCCGATACCGTACCACAACATTGGCGTCGTATCGGACC  
ATCCCCGTGTGTCCACACATTTCTCGTATGCCACATGGTCCACTACACTGCTACAATGCAATCGTTGCCCTCCGTCTTGTCTT  
CCTGCAGGCATCCTCCCTTCCCGGTTTGGTTCCTCGGCGGGGACATGAACAACGGTAGGACGACGAGACGTCATGCATCTGT  
CCTCCCGATTGGGACATATCTCCTACGGAGTACTAGTGAATGGTATTGTTACAAAGACCTTCAGTTTGGCTTATGATAC  
ATGTAATAATCTAGTGGTTTTATCCTTCTAATCTACAAAAGTACGTACCTCTGTCTAGATGGTGGTTCTGAATGTGGAAC  
GCTAGATGTATTTGCCCATGAACACGCGACCATCATCAGCAAAACCATCAAAACATCTCAGTATATATAATAAATAAATTA  
ATAAAGAAAGTTGTATGGTCAACCAATCAGTATCAGGCAAGATTTTCCACAAAGGTGCCATGACCACTAGCGGGTCT  
TACATACGGATAGCAAGTTGCCGCAACAAAACAGATCGATAAAAATCCCACGACTGAAGGTGACATTTTCTCCATGCCTACT  
GTTTTTGTCTGTCTTCTGTTTTCAGGTGGACGTCGTAAAAACAGTTGTGCGGTGTGGAGCGACCCCTTATCGGTTTCCCTATTG  
GCAACTTGTACATGTCATGCATGCCTACTGAACTCTGAAGACTGACTCAAAGTCCACAGAAAAATGCCTACTGAACTCTGAAG  
ACTGACTTAAAGTCCACAGAAAAATGCTAACGTAGCAACAGTACTTCTGGCAGCCACACATGTACATGTCAATGCGCGCAC  
TGATAACGTGATCCGCTGTTATAAATTAGAAATACCATCAGCAGGCTGCAAAACACAGCCCATCTTCCACAATGTTTACCA  
AAGCAGCTGC

>SsLRR-RLK152

TGGGGGGCATAGTGAGGCATCTCTTTTCGAAAGATCCGTTTTACCGGCTTTCATTGATAAGTAGAGAGTAAATTTATGTACAA  
GGCAGCCAAACGTAGCGTGAACCACCAGGAAGGCGAAGCCACCCACGCAAAACACAACAGAGTAAACGGCGACTCAACT  
AAGATGTGAGATCGGATTTCCCGAAGCAGGAGGCCATAGTAGGTCATCGTTGCCAGCTCAAGCATGTGCGGAGAGCAGCT  
CCGACTTCCGACCATGGCCTCACATCCTACCTCGAGACATCGCGACCGAGTCAAATTTCCACAACGACACCTTCAGGAAGGTT  
ACGACGTATGCGCCGTCGTGTTCTGTTCAAGGGTGGACCGGTTTTTACCCGTTGGAATAATGCCGGGGACGCGACGCCCCCA  
ACAGGGAAAGTGGCACCCGCGAGGCGTACCGTCTGAGGCTTTTCCGCCAATGCTCCAGCACCAGCGTCCGCGCCAGATGC  
CGGATCCTAGCTGCTGCTACCTATCATCGCTGCCAGTACCTGTAGAAACCTCGCTAGAGGGGACCGACGCGCGGCTAC  
GCAAAGCTGCGTCAGCCACCCCGCCAACAAGACGACATGCCGAACACCGGCCTCACTCCGCCGCGCGTCCCCCTGCC  
GCACGCCAAAGCCGTCGCCGCTGAGCACCCACCGAAGTACGCCACCAGTACGACCAACCATGGCGCTGTTGGAGCAGCA  
GGACAGAGCCACGGCCAGCCACGCCACCACGGCGTCGCCGACGAAGGCCACATCACTGTCACCATGCGTGCAGAAGA  
GTGGGCGGCGGACGACGCCACCGAGCTTGTCACCGCACCCGCGCGCTGCAGTCGTCATCCACCAACGACGACCACTA  
CCACCGCAGGAGCACCAGATCAGGGCCGAAGAAGTCCAGATCCGGACACCAGGGTGGCGAATCTAGTGCTCGGAGCGGCC  
GCCGTGTCGCGCGCGCCGCAACAGTCGCGCGCAACGTGAGCAACGAGCAGCGAGCAGCCCCATCCCGTCCACCGCG  
CACAGCAACCGCGCGCGCCACCCGCGCGCTCACGCGGCCACCGCGCCATGGCCGCGAGCGCGCCTCG  
CACGGAGAAAGTTCGCGGCTGGACGAGAGCCTCGCTGCCAACCATCTTAGGGGGGACGCGGGCTCCCGGACGCGCTCT  
CCGCGACGCGCGAGGTGGGAAGGGAGGGGGAGGAAGGGCTGTTGGCGGGGTAGGGTTTCGCCGCCGCGACGCAAGGGG  
TTGCTCCGAGTTTTTCCACTATCAGCTGAACAAGTAAAGTCCCTCTGTCCATAGTGAGGCATCTCAATTGTGACAAAATTGTCC  
AAGCTCGACAGACAGACTTTTGAGATTCTGAGCGCTGAGTATGAGCAACAAGAAAAAATGGAAAGCTTTTTTTTAA  
AAAAAATATTTACGCGTGATTATGGGATTGACCTTAACAGCTGGTGTAGTGATTGACCTAGCGACGGAACCTACTGTACATC  
GTGGTCAGTGGGCCGTCTCAACATTACGCCACGGCTGTGGGCTCATTAGAAAGGGGAGAGCGCGCGATCTTTTGAGTCTT  
GAGGAATGATGAGGGGGAAGAAAGAAACAAGAGAGCAGCGCTGTGCCCTTTCAGTCGTGGAGTCAAGTCTTCCCGGTGCTC  
CTGGTCTTCACTTTCACAGTTTACACTACAATCAGTCTAGGCTATAGCTGTATAGGGAGAGTCTGTGACCAAGGACGAT  
AACCCTGGCTCATCGCCGCGTCTTACCCTTTCGTTTACCTCCTGCATGCCAGCCCACTGATGACGTCTTCTTCTTTATG  
CATGTACAGAGTAACGCCTAACATTGTACTACTACGGCCCGGATTGGCAGTATAAATAACACCACCAACTACAATTCTACTTAT  
CAAAACCTTAGTGTGTTTACACTCACCGATCACACGTACCAAGCAGCCGAC

>SsLRR-RLK164

GAATAATTTTTTTGTCCAATCACATGTTTTCTTCTTTCTTTAATTGAAGTGACATATTATCTTTTGGCTTAGTTGATATCA  
TAATTAACGAATATAGAAACAATCTAGTAGTATTCTAGTTTCTGGTTGAGAGTGTCTTGTGATTTTAAAGGCAGTCATGCA  
TATAGAGTAGTACTATAAAAAAGCATGCATGTACCTATATAAAGGTTTAAAGGCAGTCACGCATGAATGGTTGATCAATCC  
AAATAACTTACAATTTTGAAGATTGAGAGGCATTTTAAACCTTCAATACCTTATATTTACAGGACCAGACGAGTACTAATCGGG  
GAAAGTATCCACTTCATTCGAGCTTCGAGGCCTTCTGGCTAGGCCCTTGCTTCCACGGCCGATACCGTACCACAACATTTGGC  
TCGTATCCGACCATCCCGGTGTGTCACACATTTCTGATGCCACATGGTCCACTACACTGCTGCAATCGTTGCTTGCCT  
CCGTCTTGTCTTCTGACGGCATCTCCCTTCCCGGTTTGGTCTCGGCGGGGACATGAACAACGGTAGGACGACGAGAC  
GTATGCATCTGTCTCCCGATTGGGACATATCTCTACGGAGTACTAGTACTGAATGGTATTGTTACAAAGACCTTCAGTTT  
TGCTTATGATACATGTAAATTAAGTATGGTTTTATCCTTCTAATTTCTACAAAAGTACGTACCTCTGTCTAGATGGTGGTTC

TGAATGTGGAACGCTAGATGTATTTTGGCCATGAACACGCGACCATCATCAGCAAAACACCATCAAACATCTCAGTATATATAA  
TAAATATAAAATTAATAAAGAAAGTTGTATGGTCACCCAATCAGTATCAGGCCAAGATTTTTCCACACAAGGTGCCATCGAGC  
ACCATCTGCGGTCATACATACGGATAGCAAGTTGCCGCAACAAAACAGATCGATAAAAAATCCCACGACTGAAGGTGACATTTTC  
TCCATGCGCTACTGTTTTTGTCTGTTTCTGTTTTCAGGTGGACGTCGTAAAAACAGTTGTGCGGTGTTGGAGCGACCCTTATCG  
GTTCCCTCATTTGGCAACTTGTACATGTCATGCATGCCTACTGAACTCTGAAGACTGACTCAAAGTCCACAGAAAAATGCCTACT  
GAACTCTGAAGACTGACTTAAAGTCCACAGAAAAATGCTAACGTAGCGAACACGTACTTCTGGCAGCCACACATGTACATGT  
CATGGCGGCACCTGATAACGTGATCCGCTGTTATAAAATTAGAAATACCATCAGCAGGCTGCAAAAACACAGCCCATCATTTTCCA  
CAATGTTTACCAAAGCAGCCTGCATGGCATTGCCCTGCTCGGTGTCCTTGTGCTGCTATCCTTCTCGACACTGGTGGCTGCA  
CACGCCAACGATGAGGCAGCGCTGCTGGCCTTCAAGGCCGTGCGATCAGCAGCGGGTACAATGGCCCCGCTTGCTTCGTGG  
AACCGCAGTACCACCGGTGATACTGCAGCTGGGAGGGGGTGAGGTGTCGGGGCACACACCGCCGAGTGGTGGCGTTGAA  
CCTCCCGTCCCATGGGCTCACCGGCGTCTCTCGCCTGCCGTTGGAAACCTATCATCCGTGAGGATTCTGAACCTAAGCTCA  
AACGGGTTTCAGCGGGAACATCCCCGCGAGCCTTGGTCTGCTGCGCCACCTCCATACCATCGACTTGAGCCGAAATGCCTTCT  
CTGGCCTGCTCCCCGTAACCTTGAGCTCTTGCACCACTTAATAGAGATGGTCTTGAATTTAAACAAGCTCAGCGGGAACAT  
ACCCTCTGAGCTCGGTGATAAGCTGAAGCAGCTCAAGGAGCTCAAACCTGCAGAACAAACAGCTTCACTGGAAAGGATTCCG  
GCGTCGCTGGCCAACCTTGACATCATTGACTATTCTTGATCTCGCGTTCAACCTGCTCCAGGGCACTATCCCGACCAGCATTGG  
CGTCTCAAGGACCTCT

>SsLRR-RLK135

GTTTGCCGACATCGGGAGGGACCCGTGCACGCCCCGCCGCTTAGCCGTGGATCCACAACCGCCGGAGGGCACCCACATGCG  
CTCATCGCGGATCCACCCACACTAGGAGGGGCCCGGCGGGATCGCGTAGATCCACCACCGCACGCCCCCGCGGTAACAGCC  
ACATGTTAGTTTGGCGCCATAGGGAGGGACCTGCTCGTGCGCCAAACACCGCTGGGAGGGTCCCCACGCACGCACCCACC  
ACCATACCCATGGATCTGCCGCCACGGGGGCGCCACACGCGTCTATCGCAGATCCACCCACACACAGGAGGACCCCGCC  
CGGGCGCTCGCGCTAGATCCACCACACGCGTGCCCGTGTGTTAGTAGCCACGTGCTAATTGCGCGCGCCAGGAGGGAC  
CCGAGCGTGCGCCTGCCACCACTGGGAGGGTCCCTCGGCACTCGCCACAGATCCATCACCCCGCATCCACCCTCGTAGC  
AGCCACAGGCTAGTTTGGCGCAGTCGGGAGGGACCGCGATGTCGCAATGCTGCGGGGAGGTTCGCCACGCACATGCTCG  
CCGCCACCCACGCGTGCTCATTGTGGATCCGCCACACCGGGAGGGCCCCCGGTGCGCTCGTGCAGATCCGCCACCGCG  
CGCCCCAACGTCAGAGTAGCCACACGCTGGTTGTGCGCATCGGGAGGGGCCGAGCGTGCGCCGACGCCACCGGGAG  
GGTCCCCGCGCGTGCCCGCCACGTAGTCACGGATCCACCGTGCCGTAGCGAGATGAGAGAGAGAGAACTGAGAGAG  
AAGAGACGCGTGTATCTGAGAGAAGAGAGAGAGAGTGCATGGGGCTTCAAACCTTAACTCAGCTTATATATGTTGGACA  
TAAGTAGCAGGCCCTGGTCTGTGGGCTCGGGTGTTTTACGGAAGAGGCCACCTCGGAAATGACCTCCACTTTTGTAG  
GTCCATAAATCTATTTTAGGAGATGGATAATTTTGCACGCTCCGTAAATTTAGTTTAGGAGACGGGCAATTTTCCACCTC  
CGAAATAAAACATCCGCTCCGAAAATCCTCAGGTATTTTAAAGAGACGTTGAGTTTGTGACCGTCAACGTTAATGATTCTG  
GCAGTGTCTCGCGAAATGATTTATGTTGCTGAAGGGTCCCATATGTCTGCGGTTCTTCCAGAACTAATTTTATAATCATGTG  
CCACTCATACGGCCTCCAAAATAAAGTGTACGCAAAATATGATGCTACTTTAATCTTAACATAATTCTTAGTAAAAATAATCAT  
CATACACTCAGCATGATGACTTTTTTCCCGCCCTACATACCAAGACTGCCGGTCTATCTGAGGTGCTGCTGAGTCGGCA  
GCCATCAACTTCAGAGTTCAGACCGTGCTAGATACGTTGGGGAGTGAGGACCGCTTTCCGATTGTTTCAACACATGACTGTT  
TCCGCACCAATAACCAACAATACTGTAGACAGTCCATCTTGGGACACAAGACAATGGTCATCAGTTCTAGAACACCGTTTT  
AGACCGTTAGAGCCGATTTCCCGGCTGTGTATATGATAGAGCTGTCTACCTTTTTTTAGCTGTCCCCGCTACTCGAAGAG  
CAACATTCAGATCGCGTGGGTCTTGACGCTCTTTTCAATTTCAAGCGTTGTGCGCTGCAGCAGGAAATTTCAATATCAAA  
GGGTAAGTATGCGCTCCCTCGGTACGTTTGTCTTCAAAGAATGGATGATTGAGCTGCACAACGTGGACAAATCACTA  
GCTAATCAATACTTTTGAAGTGAATATTGGCTTGAACCCATCTGTAATGATGCAAGGGCGTAACCACTCGCTTTTGAAGTCA  
AACTTCAACCCATGGGTACTCCCTTTATTTATATATTATGATGTATATGTATGAAACTCCAACATACATCAATACATCCGTATCT  
CTCCTCTGGCTCAAAGCCTTCAGCAGCCA

>SsLRR-RLK113

GTGGCCCCAGATGTGCTGTACTGACTGGATCTGATCTCTATCTCTAACCTTAAATAAACTCCCACTTATAATTATCTAGATCCA  
CACCGAATTAGCTGATCTCCATAGAGATGACTTTTACTCTCATCTACACCAACAAATGCACCCAGAAATACAACCCCTAGAAAT  
GTACGTGTGGGACATAGTCCCGGTATCCCGCAAGAAAAGGTGAAGACCTGGTTTGACTAGAACTTCTCTACGTAATCCTA  
GTAGTATTGCTAACTTGTAATCTTATTATGACTTATTAATTGTAACAGACTAGAAGACTTGCCTCTTTTACTATACAAAGGAGG  
GCAGAGCTCCCTAGATCGACAGACAGCAGATGTACCAACACATCGTACAAAGCAATCCAACGTAAGGCCCTCACGCCCTAAT  
GGACGTAGGGTATTACGCTATCAGCGACCTGGACCAAGTATAAATCGTTGTCTCTGCGTTTACCGTGCAGTTCTGCATACACCG  
AAGCCCATTAATTATCGTCTCAGGTAACCCCGTGACGAGTTGCCAGTCTTCAAACACCGACAATACTCACTAGATCATCTCTC  
CTCCATTCTCTCTCTACTCAACCAAAATCCAACGGTCACTGTTCAATGGTTCTGCAAGTGTCCCCCTCTGCGTCCCTACCATC  
CACCTCCCTTACCAGGTGGCGGACCTAGGATTTTACCTCAGGGTATGCTTAAAAAAATTTCTTATGCAATTTGGTTAACCATT  
TACAACTCAATAAAACCATATTCTAATTCGATAAAGCCACGTACATTAATAACATGATAAGCCTTAAATTTCAAAGATTAAAGCT  
GGAAACGACGACAAATCTCGATATAAATTGTTCAAATGAAATACAAATAGTTTCAAATACAGCCATAGAAGAGACTTATAATA  
TTACTTGTTTATCCGCGCTTTCGTAATGATATGAATGTTTCTGATTATATCATCTTACATACTACCTTCTTTGATGGATTGATGC  
TAAATTTGTAATTAGGTTCTGCTGAACGAACTACGCAACACGAACTGAAGCTAAAAATAAAGAAATCACTCATCAATAAATA  
AATAAAAAATATGACTATACCATACGAGTACACAAGTTTTTACAAGATCAGCACCTGCAGTCCAGCCAATCCTGCAACAAAG  
TGCTGCGCGCGGCCCGGCGACCGACGCAATCCCGGCCCGCGGTGTGGTGTCCCGCTGCTGGCCTAAGGCCAAACTGCCGA  
AGCTCCGCCAAAGTGCCGATCAATGCCGACGCGCGTCTGTCGCGAACTGCCGAAGCTCTGTGTCGGCCAGCCAGCGGCC  
GCTGGGGTAGAGACGAAGAGTCGATGACGAGTAGACAACGATAGACAACCTTGACTTCTCCATTCTTACGTTGCGGTGAGTTACT  
TCAGGCCGGTGCAGTAACTCGGTGTTCGCGGTATGCGCCCGTGCGGGAGCGCAGAAGTCGATTGCTTCATCTCTCTTTTTT  
AACATATAAAATTTCTATTATGTGTATGACTGTTGGGCCATAGGGTATGCCGTGGCCACCTAGCATACCATATGGGTCCGC  
CCCTGCCCCCTCTCAATCACTACACCCATTGAGCTTCAAGGTCATCCATGGCCAGTTGGCCACCACCCATGTGTCGCGCTG  
AGGCATCCCATGGATCCAGAATGCGAGCACGAGAAGCCTTCTCCTCGCCATGGCTGTAGGTAGTGTCTCTCGATGTGTCTCT  
TCCATGGCCACATTTTCGATAGAGGCAGGATTCTCATGATTAGGCAGCTAAATGATTAGGCAGCTAAATGATTAGGCAGCGCA  
CTAGCACTACGGTGGAGGAACTTTCATTCCATAAAAAGCAATCATGGAACCTCAGCTGAGACAATGCATCTGGCCATCTGC  
GCATTTACGCGATTACTCTCTCTCTCAGCCAGCCAATGCAAAAGAAACCAAGCTCTACGCCCGCCACGCAATAAACTGAAA  
GCCATCAGCGGCC

>SsLRR-RLK114

TCTGTGAATAAGGAATCCTCAGGACGGAGGAATAAAATTTCAAATTTTGTGTGACTACTATACGTTATCTACACGTAGGTTCC  
GGGTGTTTTGACGTGTATACTCAGCCAACCATCATGCATCTATAGGACAGCATTGACCGAAGTGGACAGGAAAAGGGAAC  
GACAACATAGTTGTGTGTAACCAATCATCTTCAITACATATATATTGGATTGTGATCCGCTAGTACAACCCGTAATATACG  
CAAAGCTGTCTTAAACCATGTCAGCAGTTCAATCAAAGGCGGCAGAGACTCCTTTGCATGCAGTTACCATGAAATTTAGTT  
AGCAGCAAGCAGCCAAGCAGGGGAGACCTGTGAACCCAGTCTAGGTGCTCCTTTAGTCCGTCAGTCTAACCGAGGAGGC  
TAGTTTCTCTGATCTAGTACTCTCATGCACTAAAAGTCGGTGAATACATACAGCTTACCCTGAGTGCATCTTCAACACGATG  
GAAGACAACAGTTCTAGAAATACGCGTTTGGTGAGGCCCTGAACCTTACACCTTCTCTTGTGATGCTGCTATGAATTTATTGTT  
AGCAGGACGCCAAGCAGAGGAGACCTCGTGAGCAGAGTCAAGTCTGCTGCTCCTCAGTCTGGACGATGTGGGAGAGG  
GAGAGGGAGGCTGCAAGAATTCATGTGCGCCACTGCCACGACTGCCCTCTGGTCTTTCCACCGTCTCCCCAGAACACGGTG  
ATGGTTCAATTTCAGTTGATGTAGATGTAGCAACTGTACTAATGCAAAACGAATCTGGTGGGCTACCAAAACAAGCAGTCCACA  
GAGTGGTTCAGTTCAGTTGCTGTCAATTTCTCGGAAGAAACAAATCTTCTACGTTAGTCCGTAGCAGTACTACCTGGTCATG

GTCTCCTTAGTCTGTCAGTCTAGGAGGAGGCTAGTTTCTCTGATCTAGTACTAGTAGTACTCTCATGCACTAAAAGTCGGTGAA  
TGCATACAGCTTTACCGTGAGTGCATCTTCACAAGGATGGAAGACAAGGGTTCCAAGAAAAGACGCGTTTGGTGGAGCCTGA  
ATTACACCCCTTCTCTACATGCTGCTATGAATTACTCTTAGCAAGCAGTCAAGCAGAGGGAGACCTCATGCACCGAGTCAG  
TCGTCGCTCTCCGAAGTCTGGACGAGGAGCCTGGTGGGAGAGGGAGGCTGCAAGTAATTCCTGTGCGCCACTGCCATGACTG  
CCCTCTGGTCTTCCACCGTCTCCCAAGATCACGGTGATGGTTCAATTCAGTCGATGTAGATGTAGCAACTGGACCAGTGC  
AAACGAGGTTCAATTCAGTTGCTGTCAATTCACGTTACTTCGTAGCACGTACAAACCTTCAGATGGACGGGATGAAATAAG  
TTATTTCCATCGAGCTTACACCGATGGAGATTCGTAATTACCGAAATTTGGTTCCGTCATCATACTCTGCAGTTCTTCAAGAA  
AACGAGTCCTTCGAAATCCAGCTTCATTATTCATCGATGCCAATGCTGCCGTGGCAGATAAGAACACGTTTCCAGATTCCAGAA  
CGTAGAGTAATGAGAAAACCAAGCATAGAAACCCGTTTCCAGAATGCAGAGTGATGAGAAAACCAACCGTAAAAACACGTTT  
CCAGAACGAGAGTCATAAAAAAGAAACCGATCATAGAATCAATGGTCCAGTCTTAAGTAACATGGGGAGGACAACTCCAG  
CACAGACACAGCCAGCAGTACAGTAAGAATAGTGATTACGACAGAGTGCCTACACGGAAACACAGACACAGCAAGCTTA  
TCGTGTCCACAGACTTTCCACGAAGGAATCATGGCATGGGACCTGATGAGCGAGGGAGGCAATGCATCTGGCCATCTGCGC  
GTTTCCATATGTACTACTGCTACATGAGCGAATATCATATTATCAGCCAAAGAAACCAATAAGCTCTGCGCCGCCGCCG  
CTGCTGGCAATGAACCCAAAGCTACCACGGGCCA

>SsLRR-RLK73

CAGTGGTGACCGGACGCTGCACCGGACACTGCACCGGACGCGGTCACTGTTTGACCGGACGCGTCCGGTCAGCGTCCAGC  
GTCTGCGCGTTTTCAGTCGGTTGATCGGACGCGGCGGTCCGGTACACAGCGACCGGACGCGTCCGGTTCGTCAGGGA  
GCTTACTGGACTCCGACCGGACGCGGGCACTGTGGCGTCCGGTCAGTTCTCCAGCGCGTCCGGTCGATGGTTTCGTTTTCGCG  
GACTTAGTGTTGACCGGCGCGTCCGGTCAGTCACGGGACCGGAGCGTCCGGTCGTGACCGCGCGTCCGGTCGTTGCGGACC  
GGCGCGTCCGGTCGGCGGTTGAAAACTAGCCGTTACGCGACCGGAGCGTCCGGTCAGTTGGACCGCGCGTCCGGTCAG  
CGCGACTGCTGCTCAGTTTCTAACCGGTATATTGGAAGGGTACGTCATATAAATACTCGTTGGCCGGCTCAAGGCTCT  
TACTCTTGGACATTTTGACATACTTGTGAGCACTTTGAGCTAAGCAACTCCCTCCCACTCATCTCTCTGCTTGTGTTGATAT  
TCGAAGTGAGATTGAGTGATCCAAGTGCATTTGCATTGTGAGATTGCATCTAGTTGGCACTTGGTGATTGATTGTGTCGGGA  
TTCTTGTCTCTTGGTGGTTGCGGCCACCTAGACGGCTTGGAGCAGCTTGGAGCGGTTGGCAAGAGTTGATTGTTCTT  
GGCCACCTCCGGTAATTGTGAGGGGTTTGTGCCTACCTCGGCGAAGCGCCAAAGGCAACATTAGTAAATTGCTCGTGTCAAT  
GCAACCTTTTGCCATTTGGTAGGTTCTTGTGGCGCCTTTGAGAGGCTCGGTGTGAGACCGATTAGCCACCGAACCAAGCTGG  
TGAAGAGGGACACAACGGGGACTAGCGTCCGGCAAGCAGCTGAACCTCGGGATAAATCTTCGTGTCTACCTTTTCATATTG  
TGATTGTTGATCCCGGTTTCGGTTATCTTGGTATTCATTGTTGATCATATTGGTTGGCTCAATACTTCGCCCTCGGCTGGAAC  
TCTCCTAACTCAACTCCGATTACTTTCTTAGTTATCTTTGCTTGTAGTTAGCTTTGCTAGAGTAGCTCTTTGTGTAGCTTGC  
TAGTTGTAGTTGATGTACCTTCTTGGTTTGAAGTTGTGCGGTTGAGTGCCTTTTACTAGAAATTGTAATTGTATAGGTGGCT  
GCAAACTCCCGTAGGCTAAGCAAACTCGCAGCTCGCTATTGTTATATTGATAAACTGTTTAGCTGTCTTTGTAGAAAA  
TTTTAAAGGCTATTACCCCCCTCTAGCCATCAAGACCTTTCAAAGCTTTACTCTCTCATTTGTGATCCTGATGAAAAATGT  
GGATCTTCGGGTTCTCTCTTTCGGGTGTGCTCTACGGAATCGCGTAGTTTAGTGTTCTTCTTGGGTACTCAGTGTCATATGGA  
AGACTAGTACTCTTGGGAGGACATTAGATTAGGCGGTACTGCCACATAATCTTTGCAATGATGTTTGGGTGTTCTGGTCTTCT  
TAGATCGGTATGAATAAATGACATAGAAGATTGTTGGTCAATCCCTCTTTGTAGATTGTTTGTGTCAAGATTCTTTCGAT  
TAGCATCCAGGTGAAGAACTTGCAACGTGGTTCTGCTCAGTCTTCCAGATGGTCTAAAAGAAGCATAAAACAAATTAGACGT  
CAGTCAACGGTCAAACTCTGCTTTCTGAAAACCATGGGCTCATCAGGGGGGGCTCATGATTAGGACGGCAGCTAACAGAA  
TGATTAGGCAGCGCAGTACGACTAGCGTGGAGGAATTTCTTCCATTTCCATAAAAGCAATCATGGAACCTGAGCTGAGACA  
ATGCATCTGGCCATCTGCCCATTTACAGCGATTATCTCTCTCAGCCAATGCAAAGAGACCAATCTCTACGCCGCCACGCAATAA  
ACCGAAAGCCATCACCGGCC

>SsLRR-RLK115

CTCTCCCCACACTGTTAAGATCCATGGAGCACGAGTAAGATCCACTTTCGCTCCGGCAACATCCTTGGAGGTGGCGCAGCG  
GTGTTGCAGGGGAGTCTGCGTCTCTCTCTCTCCCCACCTCGGCGCGGCGCCCTCTCCCCCTGGTGACACCTCTCTCACC  
CCCCGCGACCGAGCTCCCCACCCAGCGGCCATGGCGCTCCCGCGCCAGGTTCTCTCTCCTCCACCCCTTATGTTATAGTT  
GTATGTATAATTGTTTCAGATGTTTATAGAGGTATGTTGATGTAATATATGATGTTGCAAAAGTAGATCGGCGGAAAGTTG  
TACATGTTGCATATGTTGCAAGCGTTTGTTCGAAATGTTTCATCTGTTCCAGACATATTGTTACAAGCATTGTATGATGTT  
GTATATGTTCCACATATATGTTTACATGTGTTTATTTGGATATTGCATATGTTTCTAATTATTTTTAAAACTTTTCATGTGTT  
TTTGCAAGTGTTTATGACACATGTTTCGAATGTTTCAGTTGTTTCTTATATATGTTGCAATTGTTTAACTGTAATGTTTCAAAG  
TAGATTACGTTGTGTTGTGCTGTGTAATGTGAGCCATATAATGTAGCCGCTCCTGCTGCTGGGCGACCGTGCAATGGAG  
GGGAGCGCGTAGTAGGCGTGGAGGGGCGCGTGAAGCATGGAGGAGCGACACGGGTGGGCCCCGTGATGCGTGCAGCAGG  
CTGGCGTGGCGGTTCCGATGCGGGGGTCTGTCCGGATGCCGAGCGCTAGTGCTGCCCTACTAGCTGCCCTGTTCTAATTAG  
TGTTTCCATGTGGTCAAGGTGCTGTACGTGCAATGATTAGCCGATGTTGTCATACGAGACCGGAGTGGGGAACCGTGAGG  
CCTGTGTGCCATATGTGCCAGGACTGACATCCCTAGTTTATAACAGATTAGAAATTAGAAATCCTAGAGGTTTATTGATCTCGG  
ATTTGTGTTGGTGTGTGATGAGAAATCTTGCCTAAACGTGTGCTGAAATCTCGGAGTTCCCTCTCTTCAAATCATGGCCGAT  
TAAATATTGTACAGCTTTTGTATCTGCCGTGACACGTCAAGGTGGAACAACAGGTTGCTTATTGCCGTGCATATTGACAA  
TCAATTGATATATATATATACACGGGATATTGAATTGCGTTTGGATATACTTGTGGCACATATTGTTTAAATATATTGTTCTAT  
GGTTGTTTGTGATATCAACTTCAGAGACTATTGTGCTAGCTATTATTCTACTGTGAAAGATCGAGAAAACCGTAGACGTG  
TCATCTCATCACCTTTTATATCTTCTATCTATCATGTGATTCCACGGCTGCTACAGGACATCGTTGAATGATCTAGCATATTTT  
CTTAAATCATTCATACGAAGTAGCAGGTTTGTGTTTACTAATATACATGATGTGCATCTCTATTTTTTATTCGGTGTATATG  
TGTTTTGTTTCTATCTTTTGTATCCGAGTTCTTAACCTAAATAGACACTCCTAAATAAACATATATTAATAAACCTTTTATGTA  
TCTTTGTTTCTATTTTTCTCGTTGTTCTGATCTTTAACAACACATCTTTATTCATTTATGTACGTCACTGTCACTTTGAAA  
AAAAATAATGTCTTTAATCATGCAAGTTGAACATGTTGTTACTACCTTTTATTAGTAAAAAGATATTGCATTTGAAAAAAATATT  
ACATAAAACGATAGAAGCATAGAACAACCTCACGTGCTATGTCAGTCAAACTAATCGCAAAGTGCAAACCAACCGTCAATCCG  
CTTGCAAAAAAATAAATAAATACTCCAGTCTCCATCTAGCATAGACCAACAGGCAGCAAGCATAGTATTATACTGCAGAATG  
ATTAGCCACTACGGCGTATGATCGGAATCACGTAACGTGAGCCAAATCATCATCATATCATAGTAAGCCAA

>SsLRR-RLK218

GTGCGGCAAGCAGCTGAACCTCGGGATAAATCTTTGTGTCATCACTTTCATATTGTGATTGATTATCCCGGTGTTTCGGTTGT  
CTTGGTATTCAATTGTTGATCATATTGGTTGGCTCAATACTTCGCCCTCGGTGAAACTTTCCCAACTCAACTCCGCTTACTTT  
CTTAGTTATCTTTGCTAGCTAGTTAGCTTTGCTAGAGTAGCTCTTTTGTGTAGCTTGTAGTTGTAGTCTAGTTACCTTCTCGG  
TTTGACTTGTGGTTGAGTGCTAATATACTAGATTGTGAATTTGGATAGGTGACTTGCAAAACACCCGATGGCTAAGAAAA  
CTCGCATCTCGCTATTGGTTGCATTGATAAACTTGTGTTAGCTTGTCTTTGCAGATAATTTAAAAAGGCTATTACCCCCATCTAG  
CCATCAAGACCTTTCACGTTGTATCACGTTATTGTAGGCCATGTTGTGATGATGATGCTTGTGACCACTTTCTCATAAAGAAA  
AAAGATGAATAATGCCATTGTGGTTCTTGGGAGATTCTCCACATCGGTAGAGGGGAATCGATGGACCAATTTACATAATA  
AGATATCAAAACTCAGAACTTTTATGATTATATAATCTTGTCTACTGGAATATTTCTTCTAGACCACTGCCTTGAAAC  
CTGATGATCAATGTAATGAACCCAGCCAGTATTGTTGTTCTTCTTCATCAATGTCGATTGTGATGCTAAAACGCTCCGGCCAA  
GAACAAGGAAAAATAACGACTCGGTGGCCTTAAGACTACAGCAAGTAGACAGGGCGGAGATGGCTAAAGTGGTGGAACTCG  
AAATATTCAACCCAGGGCAACTATATGTGTGATTAAAGAAACCAAAATTTGGTCTTCATACCAACAGATAGCAATAGAAGCGTT  
TGCTGTTTTTCTTCTCCGCAACTTATTTGTAAGAAGTCTTGAATAGCTTGAGGAATGACTCTTTATTTCTTGAATAGCTTG  
AGGAATGACTCTTATTTAATCTAAGTTGTTACATCATATAAATCAAAGGTGTAGAAATTTTGCTTTATTACTAATTATGTT  
TTACATGGACTTTTTATTTAGGCATTTTTCTTTCCAACTTGGGCATAAATCAAACCTGCTAATTTTTAAAAATTTAAATTTCCAAAT

TTACTACTTCCTTTGTGCCAGATTATAAGACATTTTGGTATTTCTATATTCGTAGCTTTTACTATATATCTAGACATAATATATATAT  
AGATATATAGCAAAAACTATGAATCTAGAAAAATCAAAACGCTTTACAATTTAGAATGGAGGGAGTATTTATTAATTTGTATTAA  
GCATGGACGTTTTTTTCTAAAGAGATCTAAGTGCTTCTTTGGCTCAAAAGGAGGTTGAGTATCTTGGGCATCGTATCTCAGGGA  
TTGAACATATCTTAGCTGGAGAGGGGGACACAAACATGAAGTGATACCAAACTTTATTTTGTCTCTTTATTGTAGATTAGACTGC  
TGCTGCAAGCGTGACCGATGAATGAAGTCACCGGGGAGACATCAACTAGGGGTGACTAAGAGCCAAACAGTTTGGCAAATTTT  
GCCAAATTTTCGTTGATTGTCACTCCCAAAATAATATGGGAAGGAAATTAAGACGTGACTGAAGACGCACAAGTTTCACGA  
ATTCATATTTGGCATGCTACTACTCGCGAAGAAATTAAGACGAACCCGTGTCGCCGTGTCATCAAACGGGTCTCTCTCCGATCC  
GACCGTGTCCATTCATTCGTGTTTTCGTCTGAAGCCTCAAATTTCCAACGACGTCCAGCGTAAAAAGGAAGCATTTCATCGA  
CGTTCTTTCACGCACATCACATCCATCCAGCGTCAAAAAGGAAGCTCAAGTTTCAACGACATCGGCACGCGCAATGATGA  
TCGACACAGACGTCCTGCTACTCAACCATATAGCTCCTTCTCCACCAATTAACCAATGTAATGCAAGAAGGGCA

>SsLRR-RLK274

ACATGGACGGTAGAGACCAACTTTACGGGACATGGACGAGTAGACCAACTTTTTAATGGCATACAAGTAAAGACTCTTG  
ATTTTCATGGATGACATTTTGATTACTTTGCTACTTTAGAGGAACATTTGATTCTGCTACTACAAGTATTTCAAGTCATCAAA  
GATCATCAGTTTTTTTTCTAAAGAGATCTAAGTGCTTCTTTGGCTCAAAAGGAGGTTGAGTATCTTGGGCATCGTATCTCAGGGA  
AGGGTGTGGCCACTGAACCATCAAAAATTACTGCAGTTCAGCAGTGGCCTAGACCAAAAGAACTTCAAGGAGTTGAGGGGT  
TCTTAGGGTTGACAGGATACTATAGGAAGTTTATTAATCACTATGGAATGATCCGTAAGCCACTTTCTGATCTGCTAAAAAAGT  
TCTTCCATTTGTGTGGACATCTCTCTATTACTGAAACAGCATTTTATGCAACTCAAGAAGCTCTAGGGAAGGCCCGGTGTT  
GGCAATTCCTGATTTTCAAAAGCAGTTTGTGTTAGAAACAGATGCTAGTGACATTGGCTTTGGTGCTGTTTTGATGCAAGAA  
GGCCATCCAATTGCATACCTTAGCAAACTATGTGTGTAAGAATCAAGCCCTCTCAACTTATGAAAAGGAGTGCATGGCCAT  
TATTATGGCAGTGGAGAAATGGAGAGCCTATCTGCAAAATCAGGAGTTCATTATCAAACTGATCATAAGAGTTTAGTCCACC  
TCGCTGATCAGAGGGTAAACAACTAAGCTCTTTGGTGATGCTTTGAGGAGGATATCTCTGCAATACCTGACAATCCAGTGGCTA  
GTCTTCAGCCGGTGGCTTTTCTGGACTCTAGAATGGTGAAGAAAGGAGCTTCAGTACTGTCTCAGATTAAAGTCCAATGGGC  
GGGCATCTCTGATTCTCTGTGACCTGGGAAGAAGCTTCAGATTTGCGTCGCCGCTTTCCAACCTTGTGCAGCTTGGGGGCAA  
GCTGCTGATCAGAGGGTAAACAACTAAGCTCTTTGGTGATGCTTTGAGGAGGATATCTCTGCAATACCTGACAATCCAGTGGCTA  
CTGCCACGGCGACAGGTGATTCTGTTAGCTCTGTTAGCAAGACTGTTAGTGGCTAAGCTTGGGAAGTTAAGGCGGTTGCCTA  
ACGCTCTGTCTATGGCGTGTCTGGGCTGAGGTATATAAAGCCCTGTAACCGGTTGTAAACGATATGTAACAGAACTGAACCT  
TCCTCTGAATCAATTGCAGTTTGTCTGTTCCCAACCTCTGTTCTGTCTTTCCCAATCTCAATTCACCTCCAGCTATCGTCT  
CGGTTCTCGCGAATGATGACAGCCATACCATATACCATATAGGATGAGGTTATGAAGATAAAGAGTCGAGCTCCGACCAACAG  
CTGCCACGGCGACAGGTGATTCTGTTAGCTCTGTTAGCAAGACTGTTAGTGGCTAAGCTTGGGAAGTTAAGGCGGTTGCCTA  
ACGCTCTGTCTATGGCGTGTCTGGGCTGAGGTATATAAAGCCCTGTAACCGGTTGTAAACGATATGTAACAGAACTGAACCT  
TCCTCTGAATCAATTGCAGTTTGTCTGTTCCCAACCTCTGTTCTGTCTTTCCCAATCTCAATTCACCTCCAGCTATCGTCT  
CGGTTCTCGCGAATGATGACAGCCATACCATATACCATATAGGATGAGGTTATGAAGATAAAGAGTCGAGCTCCGACCAACAG  
ACGCCTTGGTACTACTGCCCGCTGCTATTGTGGCCAATTTCAAAAACGTGTTACGCCTGGTAAACCGGAATGGAGGGAGT  
ATGTGCTAGACACGTTTGGCAAAAAGATGTAGCATTGGACCTACTTTGAGCACCCTGTAAGTCTATACATGAACCTATGTCAG  
GCAATTAACACGAGTAACCTGCATTGTCACAAGCCTAAATATAGGCTAATGCAGGCAACTGATCAGAGCCTATACAGCGAGT  
TTGTAGAAGTGGTACACAATTCAGTTATTCCGTGCTGCCTAGCTTGGTTTAACATGATCAGAAATGCAACGTAATAAATACAC  
TGGGATAACTTACGTGGAATTTTAGACAAAATATTCACTTATGGTGTGTGCTTAAATGGAGATAAAATATATACCTGCCAAAG  
TGCTGAAACTGGGTGATTATATTAGGACGTGTTTGCTATTTTGCTGCGGATTTTCCCCAGAAAAAATTTTGTCCACTATTGTG  
TCTGAAGTTTGCCTTTGTTCTTTATCTGCTCGTATAACAGGACAGAAGTTCAACAGCCCCAGTACCATGCTTCTTACAATCG  
CACTACATCTTCTGTGG

>SsLRR-RLK289

CTATCAATATTTATGCCACCAATAAGTATCATTAGATTCATCATGAAATATATTTTTGTTGCATACCTATTGGTACGATAAATGC  
TGATACTTTTCTCTATAAAGTTTGCTAAACATAAGATAGTTAATTTATAATAAAGCTAGAGTTATATTTTTTGATAGACGAGTC  
GACAATAGTATTCTATTTTTTAACTTATGATAGTTAATTACTATCAACTCTTGCTACTGCATGGACTAGAAATTTGTAATACAA  
CTAACCAAAATTAGCTTGGCTATCTATCAACTAAAGTTAGGGTCCATATAGGTACTATGTAATCCTATCTTGTTAGGATAAACTT  
TGGTTATCGGTAATCTAATATGCTTTCCATCCATATTATCTGTTTTCCCTTTTCGCATGACCCCCATCGTGTGTTTGAATATGAT  
TTAGTTGAAACTTCAGCTTTGGTAAACTTATCTCTTGTGTCAGCCCATGTGCTAGAACTTCACGAATCTAGATTTTAGCTTTCT  
AGTTTCTCTTGATCTTTTAGGTATTGCATTTTTTACTCATTTGTGTTAAGTTGAAACTTTCTTTTGAAGTTGTGTAAGAACATG  
AAGTCTAGCTCTAGACACACTTTGATTAGTTCAAGTGCGGCTAACCATGGAATTTCAACCTATACCGCAATGCAACAGATATTA  
ATTTTCTCTATCAAAAAATATGCACAGTAGATTAACTATAATAAATAATGTTATAACGTTTCACTTAAATGTACAAATTTACT  
TAAAGGTACAACCTAAATAATTTATGTACAACCTAAATTAGATGTCATAGAGTATTAATATAATTTGATTAAAAATATATTGTTA  
GTGTCATTGCTGTGATTGGTTAAGGAAGCACTTTAATAATTTGTGTATACTATGAAAAATATACTTATATACCACGTCATGTG  
CTTCGCATGCTGCTGCCACACAATTTGTAGGCATATGCAAAATACCTTATGTGGATAATTTAGTTGTAAAACTTAAAGGGCT  
CTTTTAGGGGCCGTTTGGATGGCGTCCAGAATTTGCCGCGCCACGCTGCACCTGCCACGCCACACTTTCGCACCCGCTTTGG  
TTGCGTGCCGCAAGCTGCCGCGAGTTGCGGCACGCGTGGTGTCTAGTTTATTTGGAAGTCCGCAAACTTGGCCGAGTTGCGGG  
CGCGGATTTACCCGCGAACTTTCAGCGCGGCCACAGCTCGCGCGCGCAGCTTCTGGACAGCATCCAAACGGCCCTTAG  
TTGTTTCTAATAATGGAAGAGGTGGTAATTAATAACGAACTTTACATAACCTTTCTTAATGATAGAAATGAGCAATTTAGAT  
GTAAATTTTGGGAGTCACTACAGATTATGTGTACATAATAGAAAATGTTGTTAAGTTGGATGAAAACCTTAGGACGTTAATTTGT  
TTGTTCTAGACAATGCCAAAGTTGGTTAATTTGGAATAACACGATCAAACTATTGTTATTGTTAATGTTGATTAGAGTCTACCA  
AATATTGGCAATGCTTTTAAAGAAATTTATAGGATGCATGATGACATCAACAACACATGGTATGCAACACAGTATGCTGCTTCT  
TTAAGTTAATGTTTCACTAAACATATCGAAGACACGTAAAGGTGCAATACACAGGGGAAAACCTATAAGCAAGTTATCATA  
ACGGGATAGAGGTTATAAAATATATATGGATATATGATGTTAGAAAATGAACAAATAAATATAAGCAATGATAAAGGATTACGA  
TTAATTGTGTGATTAAATTTATCTACGAACATTTTATACTATTCTCATATGATTTTAGCTTATGCAAGAGCAGGTACAGGTTG  
ATAGACTAGTTATAACAGTAACACTTATCTGAGCTTCTGCACTTCTTATTGTGTCATATAATCAGGATCCATATTCAACCGGCG  
TAACAAGACTACCTATGAATATGATGGTTCCGGCAATCCTAGTACAGTTTCTCTTAGTGCT

>SsLRR-RLK305

ATTGGTTTGCATGATGCGGTATCAGGTCACTTCCGCTACATCCGTATACAGTTAATGCTCACCAAAAAAATATCTTGTTAGGTT  
TTCTAAACTGTTATAGTAGCCGTACGAAAAATAATTCTTCTGCTAGGTTTGAAAGTATTAATAATTTGTTGAACAGGCTTTTAGG  
AATAAAAAATACATATAGCACCTCATTGATCTCACAGAACAGTGTGCGAGTCGCGGTTCACTATAAATGAGGAAAGGTAGT  
CTCTTATCTCGCAGCCGTCTGCCCTTGCCATTTGCTTCTCTATCGGTTTGACAGCTTTGCACCAAGCCTCCATTGGACTTCT  
TCTTCGAGTGTCTGCAGAGTGGTAAGAGCAATTTATTTTGCCCTTGTGTCGTCATGCTATCTGGCTTTCATCTCTTCTCCATA  
ACATGTAACGCACCTGATGGGAACTGTTTGTTCCTTAAATAAATTAGTAACAGAGCTTCTAACAGTGCACAGAAATAAA  
GCTTTAAGTTCTAAATTTCCCAAGGTACTTTTGGCAAAACATTTATCTGAACCTGCTTTTTTGTCTGACTTGTGCATATAATCAA  
GATGAAATTTGACCAAGAGATCAGACCTAGGCACGATGCTGCTTCTCAATTTGACAGTTTCAAGTTCATGGTGTCTGCTGCTCT  
GTACACAAGTTGTCTATCTGCTCCTTCAATGGAACTCCACGGATAAGGTATCACTATTGGAGTTCAAGAACACTATCAGTGAT  
CCACGACAGGCCTTGATATCTTGAATGATAGCACACACTTGTGTCAGTTGGGAAGGTGTCCAGTGTAGTGTAAAGCACCAC  
TTCGGGTCACTTCACTTCGCTTGTACAATCAAGGTTTGGTTGGGCCAATATCTCCTTCACTTGGAACTTAAACATTTCTAA  
ATCCATAACTATCTGACCAATTCATTTCGTCGGCGAGATCCCTCCATCCCTCACTCGCCTGCATCGCTCCAAATCTAGATTTA  
AGTAATAACACGCTTCAAGGAATGATACCAAGTCTTTTAAATTTGTCAGATCTCAAGGAACTCATTGTGAGAAGAATCAGCT  
AGCTGGACAGATTCTGAAGATTGCGCTTTTGGCCTTCAAAAGCTGGCACTTACCTTAAACACCTTACTGGAAACGTTCCA  
TCTTCTCTTGGCAATATCAACAGCTGAATTTAATTGCTGTATGGGTAATAATATTCAAGGCAACATCCAAATGAGTTTCA  
AAATTGACAGCGCTGCAAACTCTGTACGTGCGCTTCAATAAGTTGTGTCAGGTCAATTTCCGACGCTGTCTGATCTTTCCAA  
TCTACTAAAAATTTAGCGTCGCTTTCAATGATTTTAGTGGAGAGGTACCACCAATATAGGCAATTTTACCAATCTCCAAAT  
GCTAGAATTAGGTGCCAACTTCTTTCATGGCCATATACCATCTTCATTGACAAACGCCTCCAAGTTAACTGAAATTGACATATC

ACAAAATTCTTTCAGTGGGGTGGTGCCTAGCTCCATCGGCAGAACTTTCTCAACTATCTTTTCTTAATCTCGAGGTAAATGAAC  
TCCATTGCAAAAAACAAGCAAGATTGGGAGTTTATGAAGAACTTAGCTAATTGCACTGGGCTACAGATGTTATCGGCAGTAGA  
CAATCGTCTAGAAAGCAATTTGCAAATGTCACTAGGAAACCTTTCCAGTGAGCTCCAGTATCTACACTTGTACGAGAAACCAA  
CTATCAGGGGATTTTCTCTCCAGTATAGCAAACCTCGGTAACCTGTTAATTGTAGCATTGGCCCCGAATCAGTTTACAGGTGT  
GGTTCCAGAATGGCTTGGGACAATAAAAAATCTGCAGATTGTGTCAATTAGGCAATAATTTCTTACAGAAGTCATTCCATCAT  
CCTTTCAAATCTGTCTCAACTAGTAGAGCTCCATCTAGAATCGAACCAGTTGAAGGGACACATACCCTAAAGCCTGAGCAA  
CTCCAG

>SsLRR-RLK245

GGACCTGCCGGTGCTGAGAGCTTGTCTGAATAAAAAAATTCGCCGCCGTGTCTTCCCTAGTTCCAGTCGAGCGCAAACTGC  
GGCGCCGTTCGCCGTCCGGCCGTCCCGTCTATGGACAGCCCCGCCCTCTTTGTCTTCGTCTCCTAGCCGAGAGCCGCACGCTCT  
TCATCTTCGTCTCCTCCCCGAGGGCCGCACTGTCGCCACCCCATGCCAAGCGTCGCGCCGTCCCGTCCCTTGCCGAGCTCT  
GCGCCGTACCATCCCTCGCTTCTAAAAAGACCGTGCCAAGCTTGTA AAAAGACCTCCTTAATCAATCCATCAGGATGA  
CGTAGTAGAGGATGGCAAACAAATTAGGAGAATATTGATGCAATCTGAACACACATGGAGAGGAGCGCAGACCTGCGAACA  
TGTTCCTGACGACACAACAAGCAGCAGCCAATTGCCGACGCTCACCTTCGTGCTCGCGGGA AAAAGCTAAACGCCGAC  
GACGATGCCTACCCCTCGCGGCCTTACTCGCGGGA AAAAGCAAACCGAAATCGCGCA AAAAGGAAAAAGACGGCACCAAAA  
CGGGGGAGAGATGGAGTTATTCTTGGGCGGAGGCCAGATAACAAAGGAGCGCTGCAGCCAGACCTGCAGGCTCCGAGCG  
CATAGGTCGCACTTCGTTCGATCTGAGCTGACGGCATGATGTGCTGACTGCAGGCGCAGTCGATCAGGTTGAAGTTAGAC  
AATCTTATTCCAGCGGTGCTGCTGCGTGATGGCGAGTGCTGTGAGTGGGTTGGTCTGTCCAGACAGACGGATGCTCGGGTCT  
GATCATTATGATAATTACATCGAAAAATATGTAAATAGAACGGAAATTTTCGAGTAAAAATGGATCCCTAAAAATGGTCTGA  
CAAAAAGGAAAGGTCCGTGCGGGTTTCTGTCTGTTTTATCTCATGGACTAGTAATGCATAACAAGAAATTA AAATCACTA  
TTACTCTTCCATGCATACACCACCGTGTGAAGCATGGCGTTGCACATAACTAGACATTTTTTTGTCCGATACATAC  
AAGTTGACTGGACTGGCAAATTTATCCGAATCGTGCCACACGATGCGTTCTGGAAGACCGATCGTCACAAGGAACCAAAT  
CTGATTTGGGAACGAAAAATTCAGCGTCCGTAGACCATTCCACGAGCTAATTTTCGTGACGACGGAACCGCACAGACAGG  
TCGCACAGCGGCGGACGCGTTGGGGGTATAAAGCAGCTGCGCCTTTGAAACGTGAACATAGAAGCCAACGTTTATGATTC  
TTGTCCAGCTCAAAACAACAGCGACGGCGCTGGGCCACGGGAAGGAAGCTGAAAGGTAGCCGTGACTGGTCAGTTTGACGG  
ACTCTGGGTCTTCACTGCAATAGCGGTCAAGCTAAGCTAAGGCACGGGTAACGCCAAATATGCGGATGTGACGCCACTGCA  
AAATGTTTTTAACTCCCTTGGGCCCTCAGCCAGCTGAGCATCCAGCTCAAACTTCACACACTAGTCCACCCACGGCAAGC  
AAAAAAGCAGCAAAAAGGCTGTCGTGTTATTGTTCACGCTCGCGCGAGCAGAGGTCCCGTACTCTTCTCTGCGTTCGTG  
TTTCATTTTATTTTGGGCCAAGTTTTACTGTCAAGTTTATCCTCTTTGTTGTTGCCGATGAAGTGTTCGACAAAGGCAAATTTCT  
CCTACTTTCTGTAATACTACTAGTCTACTAGAGGTCTAAACACTTCTGTCTGCAGTATTATAGGAGAAAACAGCTTTAATCAGT  
TAGGGCAGGGGCGGACGCGTTGGGGGTATAAAGCAGCTGCGCCTTTGAAACGTGAACATAGAAGCCAACGTTTATGATTC  
TGCGTTTTGCAGCTAACGAAAGCCTTATGTTCTTTAAACAGGCCATGAAACTCTACATGTTTATACAAATGTTGGTACAGCTG  
CTGCTGTTTTGCTGTGTTGGTAACGCTCTGTTGCTCTA

>SsLRR-RLK106

AAAGTTAAAAGAACTACATAAAATCCATTGGAATATCATCACAGATACATAAAAGATACTACATAAAAGACTACTGAGGAAG  
ATGATTAGAGAGAGGACTAAAATGATTAGAGGAGTTTATTTTGCACCCCGTCTATTCTAAATATAAGACGTTTTGACTTTTCT  
AGATTTATTGTTTTGTTATGTAATTAGATATACACCATGTCTAGATACATAGTAAAGAAATTGTATCTAGAAAAACTAAAAATGT  
CTTAGAGGAGTAGCAATTAGACACTGTACATTATGAGCTATAGGCTTTTAGATGGTGTGATCTAATATGGCATATTATTTGCC  
TCATGCCTCATAGGACTCCTCTTCCCGTGCTAGGGTATTTTAATACTCCAACACTTTGATTTTTTTCGCTTTATATTAAGTTC  
AACTAGTGCATGACACCTCACCTTAACCTCCCCCTCTTCCATGGTTTCCAATGCTAGAGCCACTATACTACAACAAAACCTTT  
TGACGCATTAGGCCCTATTTGGTAGGTCTCTGGTTCTGGCTCTTCATGTGAAGCAGCTTCCGTGGTGGAGTAGAACCACTTTG  
AAAAACTTTTACGAAAAAGGACTTCCGTGACAGTTTTTGAATAAATTATATTAATTTGTAAGTTGGAACCAAGAGAAAGTTAT  
TTTTTTCGGTTCTGATTGCTCTTTACAAAAACAACCTCTAGCTCCTGCGGGCTCCTTTCAAGGTGCTTTTTTTTATATGCTCATT  
GACGGGACTCCTTGCAAAGAGACACAAGAGCCTTGCCAAAGGAGGCCCTTAATGTCTTCCAATTTAACACCCATCTTGTCTAT  
ACTCGGAGAGGTCCCTTCCCAAACTCTAATCTCTAGACCTAACCGTTGCTAGTACTCTTTTGCAGGGTTTAAAGCAACTTC  
AATTTACCTGCAAAAAACACTAGCCATATCACAGTTACATGAACCTCCTTTTATTTCTCTCATTCAAATAAACTAGGAGCCAA  
TAAAGTTAGTTTTTTTGGAAATAACTGAAGCCGGTTGAAACCTTGCCAAATAGTTTATAAGCTTGCCAGAGTAGTGGA AAA  
CCCAACTCAACGAAAAATGCAGCAAAAGGTIAGCAAGGTTTTTACATGTTTTACCCCTTTTTCTTACAGAAAAATACTTGGCGT  
ATATAATCTATGCGTGTAGTTATCAAAAAACCTATGCGTAAATTCGATCAAATCTCAATAATACATGCAGATTGCGTGCGCT  
GAATAAGTATTTCTACTAAAAAAAATGAATGAAAATAGGGAATCTGTGTTTTCAAAAAAAAATCTCAATAATACATCAGGTC  
AGGCGTGTGGCCCCATGTGCACGTCAAATCATTCCAGCCACTTCATTCGTTTTCGTTCCCAAGTCAACACCATGGAGGG  
GGAGGGCCGAGGACGAAGGAGGATTCTGAATCTATCCATACCATCAAAAAAGGACGCCAACCACTCTTTTCTACGAAT  
CCATCTCTCTCTCTCCTCTCTTTCTCTATCTCTCTCTCGCCCTTGCTCTGCTCTACTACTCCCCCAACTGCCAGCCGAA  
TTCTCTCTCTCTCTCTCTCTGTTAGCGAGCAGCTCCGCCATTCCCCAAGCACAACAACCTCCTCCAGAGGCGGACGCAGT  
CGGTGCCATTCAATGCCCTGACGGCTGCCCGGCCATGCACCTGAGACTGAGACACAGGGCGCCTCTGCTGTCTGTCTCTCT  
CTCTCTCTCTCTCTCTCTGAGACACGACGCAGTCACCGCCACTCTTAACTCCCTGCTCGCTGCTTCCGACGCTGACT  
CGCTCGGAACCCGTGCGCCCATGCACGACCCGCGCATACGTGCGCCTCCCTACTTGCCCTGCGCTGCTCATGTACCCT  
CCACAATCTTACACCTAGGAGGAGGCTACGAGCTCAAGCTCTTGCTAGCTGTGGCGAGCGGCGAGCATTGAGTTGAGGGG  
CACCGAGA

>SsLRR-RLK86

AAAATCCATTGGAATATCATCACAGATACATAAAAGATACTACATAAAAGACTATTGAGGAAGATCATTAGAGAGAGGGCAA  
AAATGATTAGAGGAGTTTATTTTGCACCTCCGTCTGATCTAAATATAAGACGTTTTGACTTTTCTAGATTTATTGTTTTGTTAT  
GTACTTAGATATACACCATGTCTAGATACATAGTAAAGAAATTGTATCTAGAAAAACTAAAATGTCTTGAGGAGTAGCAATT  
AGACACGGTACATTATGAGCTATAGGCTTTTCAATGGTGTCTATCTAATATGGCATATTATTTGCCCTCATGCCTCATAGGACTC  
CTCTTCCCGTGCTAGGGTATTTAATACTCACACTTTGATTTTTTTCACCTTTATATTAAGTTCAACTAGTGCATGACACCCTC  
ACCTTAACCTCCCCCTTCCATGGTTTCTCTGCTAGAGCCACTATACTACAACAATCTTTTTACGCATTAGGCCCTATTTGG  
TAGGTCTCCGGTTCTAGCTCTTCATGTGAAGCAGCTTCCGTGGGAGTAGAACCCTTTGAAAAAACTTTAGCAAAAAAGGA  
CTTCCGTGATAGTTTTGTAATAATTATATTA AATTATAAGTTGGAACCAAGAGAAGTTATTTTTTTTCGGTTCTGATTGCTCT  
TTACAAAAACAACCTCTAGCTCCTGCGGGCTCCTTTCAAGGAGCTTTTTTATATGCTCATTTGACGGGACTCCTTGCAAAAGAG  
ACACAAGGCCTTGCCAAAGGAGCCCTTAATCTTCCAATTAAACACCCTATCTTGCTATACTCGGAGAGTCCCTTTCCAA  
AACTCTAATCTCTAGACCTAACCGTTGCTAGTACTCTTTTGCAGGGTTTAAAGCAACTTCAATTTCACTTGCAAAAAACACTAG  
CCATATCAGGGTTCACATGAACCTCCTTTATTTCTCTCATTCAAATAAACTAGGAGCCAATAAAGTTAGTTTTTTTTTGGCAAT  
AACTGAAGCCGGTTGAAACCTTATCAAATAGTTTATAAGCTTGCCAGAGTAGTGGA AAAACCAACTCAACGAAAAATGCAG  
CAAAAGGTAGCAAGGTTTTCATGTTTTTCCCTTTTTCTTCATAGAAAAAATACTTGCCATATATAATATGCGTATAGTTATCA  
AAAAACCTATGCATATAATTCCGATCAAATCTCAATAATACATGCGGATTTGCGTGGCCCTGAATAAGTATTTTCATTAAAAATA  
AATAGAAATAGGGAATCTTCCCTGTTCAAAAAAAAATACTCAATAATACATCAGGTACAGGCGGTGGGCCCCATGTGCAGG  
TCAAATCTTCCAGCCACTTCACTCGTTTTTCGTTCCCAACAAGTCAACACCATGGAGGGGAGGGCCGAGGCAAGGCA  
GGAAGGATTCTATCCATCATCCATAAAAAAGGACGCCAACCACTCTCTTTCTACGAACCTCCATCTCTCTCTCTCTCTCTCT  
CTCTCTCTCTCTCTCTCTCTGTTAGCGAGCTCAGCCGAGCAGCTCCGCCATTCTCCAAGCACAACAACCTCCTTCCAGAGG

CGGACGCACTCGGTGCCATTCAATGCCCTGACGGCTGCCCGGCCATGCACTGAGACACAGGGCGCCTCTGCTGTCTGCTC  
TCTCTCTCTCTCTCTCTCTACGCAGTCACCGCCACCTCCTTTAACTCCCCTGCCTCGTCGCTTCCCGACGCTGACTCGCTC  
GGAAACCCGTGCGCCATGCACGCAACCCGCCGACATACGTGCGCTCCCTACTTGGCCCTGCCCTGCTCATGTACCTCCACA  
ATCTTACACCTAGGAGGAGGCTACGAGCTCAAGCTCTTGGCTAGCTGTGGCGAGCGGCGAGCATTGAGTTGAGGGGCACCG  
AGAAG

>SsLRR-RLK105

TCCATTGGAATATCATCACAGATACATAAAAGATACTATATAAAAGACTACTGAGGAAAGATGATTAGAGAGAAAAGAGAGGAC  
AAAAATGATTAGAGGAGTTTATTTTGCCTCCCTCTGTTCTAAATTATAAGACGTTTGGACTTTTCTAGATTGTGTTTTTGT  
ATTTACTTAGATATACACTATGTCTAGATACATAGTAAAGAAATGTATCTAGAAAACTAAAATGTCTTTGAGTAGCAATTAG  
ACACTGTACATTACGAGCTATAGGCTTTTAGATGGTGTCTATCTAATATGGCATATTATTACCCTCATGCCCTCATAGGACTCCT  
CTTCCCCGTGCTAGGGTATTTTAAATGCTCCAATACTTTGATTTTTTTTCGCCTTTATATTAAGTTCAACCAGTGCACGACACCT  
CACCTTAACCTCCCCCTCTTCCATGGCTTCCACCGCTAGAGCCACTATACTACAACAATCTTTTGACGCAATTAGCCCCATTTG  
GTAGGTCTCTGGCTTTGGCTCTTCATGTAAAGCAGCTTCCGTGGTGGAGTAGAACCCTTTGAAAACTTTAGCAAAAAGG  
ACTTCCGTGACAGTTTTGTAAATAATTATATAAAATTTGTAAGTTGGAACCAAGAGAAAGTTATTTTTTCGGTTCTGATTGGCTC  
TTTACAAAAAACAATCTAGCTCCTGCGGGCTCCTTTCAAGGAGCTTTTTTTATATGCTCATTTGACGGGACTCCTTGCAAAGA  
GACACAAGAGCCTTGCCAAAGGAGGCTTAATCTCTTCCAATTTAACACCTATCTTGCTATACTCGGAGAGGTCCCTTTCCA  
AAACTCTAATCTCTAGACTAACCGTTGCTAGTACTCTTTTGACGGGTTTAAAGCAATTTCAATTTCACTTGCAAAAAACATA  
GCCATATCACGGTTTACATGAACCTCTTTTATTTCTCTCATTCAAATAAACTAGGAGCCAATAAAGTTAGTTTTTTTGGCAATA  
ACTGAAGCCGGTTGAAACCTTGCCAAATAGTTTATAAGCTTGCCAGAGTAGTAGAAAAACCACTCAACGAAAAATGCAGC  
AAAAGGTTAGCAAGGTTTTTCATGTTTTCCCCCTTTTTCTTACAGAAAATACTTGGCGTATATAATCTATGCGTATAGTTATCA  
AAAAACCTGACAGTTTTCCGATCAAAATCTCAATAATACCTCGGATTTGCGTGGCCTGGCCTGAAATAAGTATTTTCACTCA  
AAAATAATAGAAATAGGGAATCTTCCCGTTCAAAGAAATAAATCTCAATAATACATCAGGTACAGGCGTGTGGGCCCCATG  
CTGCAGGTCAAATCATTCAGCCGCTTCATTGTTTTCGTTTCCACACAAATCACAACCATGGAGGGGAGGGCCGAGGACG  
AAGGCAGGAGGATCTGAATCCATCATCCATAAAAAAGGACGCCAACCACTCTCTTTCTACGAACTCAAAGAGTCTCTCTCTG  
CTCTGTATCTCCACCTCACCTCTCTCTCTCTCTCTCTCTCTCTCTCTCTCTCTCTCTCTCTCTCTCTCTCTCTCTCTCTCTCT  
CTCTCTCTCTCTCTCTCTCTGTTTACGCGAGCAGCTCCGCCATTCCCAAGCACAACAACCTCTTCCAGAGGCGGACGCGAGTCG  
GTGCCATTCAATGCCCTGACGGCTGCCCGGCCATGCACTGAGACACAGGGCGCCTCTGCTGTCTGCTCTCTCTCTCTCTCTCT  
CTCTCTGGAAGGACTGACGCTACCGCCACCTCTTTAACTCCCCTGCCTCGTCGCTTCCCGACGCTCAATGAGTCTCTCTCTG  
GCCCCGTGCGCCCATGACGCAACCCGCCGATACGTGCGCTCTTACTTGCCCCCTGCCCTGCTCATGTACCCTCCACAATCTT  
ACACCTAGGAGGAGGCTACGAGCTCAAGCTCTTGGCTAGCTGTGGCCAGCGGCGAGCATTGAGTTGAGGGGCACCGAGAA  
GATGGCAAT

>SsLRR-RLK435

TATAGTCTAAGTAGGCTTAAAGATTGCTCTCGTCCATTTGCTCTAAACTGTGTAATTAGTTTTATTTTTATCTATATTTAATACT  
TCATGCATGCATTTAAAGATTGATGTGACGGAGAATCTGAAAAATTTAGGAACTAAACAGCCTATAAAGTATTAACCCAA  
TCCAAACCTGACGGCCCCCATGTCAAGCTGTGCCATGCTCTCGATCTATTACTCGAGTTCTACTGCTTAGGCCAAACAGAG  
AGGCCAAACAGTCCAGCTCTAGACCAGCCGAACCAAGCCCAACCAAGTCAATGCTTCAAGAGAGAAAATCACTGTAGTCG  
TTGATGTGACCTCTCAGTGTCATTCTCCCAATCTCTCTCATATAAGAAACCAGGGCTGTGTTAGATTGCGAAAAAAAGCG  
AACGTGATGAATAGTACCATTTTTGCTTATTTAAACAATAATTTTCAATCGTGGATCAACTAGACTCAAAGAGTTCATCTCGT  
GATTTCCAATAAACTGTGTAATTAATTATTTTTTTTACCTACATTTAATACTCCATGCAAGCGGTTAAAAATGTATGTGACGG  
AGAGAGTGAAAAAACTTGAATTTGGATGGCATCTAAACAAGCCCCCACTCTCTCTAGCGCTTAAACAGCCATTCTCTTTCT  
CTCTAAACTCCAACTAGTCCTACTAGTAGGAAGCTGCTCTCCATAGCCCATAGCCCCCTGCCCTGCCACTCTATCGCCAGC  
CATACAGCTACTCGCTGTCACTGAGCGAGCGGCGCAAGTGGCGAAAGCCGAGCGCGAGAAACCAACGAAACCAACAGAGC  
TCCGCCCATTAAGGCAGACAGGCTCGCTGCAGCACGCTTCGCGCTCCATCGTCGCTGTCTCTCTCTCTCTCTCTCTCTCTCTCT  
CCGATGCTGTCTGACAGCTCAGTGGCCATGACGACGACGCGCCCGTGTCTCTGTCGCTCTCTCTCTCTCTCTCTCTCTCTCTCT  
TCGCGCAGATGGTTGGTGATCTGTTCTTTTTTCGATATGCTATGCTCTCTTTATTTCTTTCTCTCTCTCTCTCTCTCTCTCTCTCT  
TACTGGGGAGCAAAAGATTAGGGGGTTGGGTTTGTAGGATTAGTATTTTATTAGCGCTGCAAGTACGCGCTTTTGGAGGCAT  
GGTGATTGCTAGTGTCCATTCCCATTTTTTATTGCCGTATAAGCCCGTAACCCGAGTCTAACACTTAACTAATCCTTGTGA  
GCTGTGCTCTTCTTCTTGCCTAGGAGCTTTAACTAGTCTGCCCATGTTTCAAATGTGATCTTTTTTTTTCTCTTCAATCAT  
GTTCAGTTTTGTGCTGCTTCTCTCTCTCTCTCTCTCTCTCTCTCTCTCTCTCTCTCTCTCTCTCTCTCTCTCTCTCTCTCTCTCTCT  
CTTGAGCTTCGATTCTGTTTCTTTATTTGGCCCTTCAGTGTGGAAGCTTGGTCTGTTTGTGTTTAGTCTGTTCTATTTTTGTGT  
GTTTTAGCTGTGTTTGGTTTGTCTATTCTGAGTATGATCTGTTTCTCTATCTGAATGAATCCAAGTAACTTCATATTTACCATC  
GTGTCATATTTGGGCTTTCCAAATCTGATGTTCCCCAGTTCCTTTCTGCTTCCGTGCTGAAAAACACTAGTCAGAATCCAAGTATCT  
TGTATCCGACTCCCTTTTACGAATATTCATTTGCCGAATCGTCTGTTTCAAGATTCTATCAGCCTGTAATCTGTTACGTCT  
CCGTTTTTTTCTGCTAATGCGGCTGTTTCTGCATCTTCCAGGGCGGACGCTGGTGGAGATCAAGAAGTCTTCCGCAACGT  
CGGCAACGTACTGTACGATTGGGCGGCGGACGACTACTGCTCTGGCGCGGCGTCTGTGCGACAACGTACATTGCGCGT  
CGCTGCGCTGTAAGAAGAGCGTCCATTAACCTTTGCTCCTTTCCCAACGATTGCGATGTGTAGCCACTGATCGGGGTTGGCG  
CCA

>SsLRR-RLK406

TGCGACAACCGATTGCGAACCTTAGTATGACGAACGCAAAAGTACTCCAGTTCGGCTCGCATCCACTGGAGGAGATGCATT  
GTGAAACAAGCCGCAAGGCAAGGCGCTGTAAATTTGGAGTTTCTCTACCAATATCATCCACCAGGCCGCTGCAACTGTATT  
TATGATGTATTCCAATCCCTCCCACTTCTGTGTCTCTCGCACCAGCTGACAAAGTATGGATTATCGGCATTCTTCCGGGGAT  
TCCTACATAATGAAAAAATTTCCCCAAGCTTTACCAATAGCTTCTTTGCAATTTTCCCCTTCTGCGTCCAAGAGCCTGTATC  
AGCTCTGTCAAGATCTCGCGAAAGTACGCACGCAATCTGGTGGCACACGGGAGCAATGCAAGGTGTCCGCCCGGTACCC  
AGCCAAATGCTGTTTAAATCTAGTGCAACACCGCCTGCTCTCGTCACATGACAATATTGCATCTCCATCCAGGAGCAAGAT  
GTGCACCATGCTCCCATACAACGCTCTGTTTCTGCTGCATATGTCTACTCTACCTGCATAAACGGACAACACAAAGTCACA  
CCTAAATAAATGTTTCTAAATCTTACCACAAATCTCCATAATATACCTAAATATACCTCAAATCTACCTCATATCTAAAT  
CAAAGTTACAATATATACACAAAGTCACACAATGTATACCTAAATCTAAATCTTACCACAAATCTACCTCTAATCTAAAT  
CCTAAAAAACATCCTAAATAAATCTACCTAAACCTAACCAATCTAAATCTTACCACAAATCTACCTCTAATCTAAAT  
CCTAAAAAACATCCTAAATAAATCTACCTAAACCTAACCAAACTATCCTAAATCTTAAAAACAAATCTTACCTAAAT  
CCTAAAACTACTCTAAATAAATAAATAAATAAATAAATAAATAAATAAATAAATAAATAAATAAATAAATAAATAAATAAATAAATAA  
TAACCGAGCGGCTAACCGAGCTAACCGAGCGGTTAACCGACCGGCTCAACCGGCTCGGTAAGCCGACCAACCGGTGCGGT  
AAACCGACAGATGCGGCGGCTAAGCCGCGGCGGCGGCGGCTGCGCTAGGGTTGCGCCGAGCGCTGCGGTTGGGGGTGAG  
GAAATGAGGTGCGGCGGCTTTGGACCCCCCGCTCACTGCGGCTTGTGTTTGTGCGCGTGAAGCGGCTGAGGGCTCA  
TGGGCTTAAACGGGCGGCACTGTTTTTTTTTCTTTTTTTTCAAACCTTCTATTGCTATAAATAAATACTAAACGAACCTCAAAT  
TGAAAAATTTTACACCATTTGCTTCTATAAATCATGGACTATTTTAGGAATTTTTCAGCATTTTTTTTTCAAATTTAAATTT  
GAATTTGGGGAACCCCTAACCGGGCGGACCGGAACCGGACCGGCGGCTTTGGGCGGTTACCGCGGTAAACCGCGGTAA

ACCGGCCGGTTTTTTTAAACCTGGAGGCACCTTGCGCCGGTGCTAGCTGCGACGTGAGCTCGTAGCAGCCAGTAGGAAGGAC  
TTCTTGGCCCGCCGGGTTTCGTGTTGCCGGAAAGGCGGTGGCTTTGGGGAAGAAAGCGACGGTTGCGAAAGGTTCTTGC  
GGATTTCGACCGGGAA

>SsLRR-RLK437

GATACATTCTAGGGTTCATTGGCAGCTCAGAACGATTTCAATGGTGGCATGCCACTAGCACATTATTATTGGAACATATAT  
TAGGTACCACACTAATAGATACTATTGCTTATTCATGCCATATCAGCTGACACGTGCTGTCAACATCTTGACCTATACATAGTCA  
TACGACTTCTAGTCCAGCGTGCTTGTGCTAACCTGGACACTATAGGCCAACTAGACTAGCTACCCCACTCTATTGTCAATCGTC  
ACCACGCTTAGGGACGACACATCACTCGATTGCGCGTACCCTGCTGTGCTGCCAGCACCGCCATCGCCCACTGGGGCTA  
TGTCGCTCGCTCCGCCTCAACCATTTGTCGTGCGCCATATGCAACCACGCCACATGCGAGTCCACAAAAGGGAGGGCGAACTG  
GCGAGAAAGGAAGGAGACGAGATACAAAAGCAGGGAGATAGGGTCTTGGAAAGGGGTGTTTATATACTTCACTCTCCACTCA  
TCTAACGGTTGTAATCTACTCTAAGCCATCGTTCAATGGTGGCTCTGTAGTGTGTGCTTTTTAAGGAAGTGGTAGGGC  
CATTGAATGGGCCTAGCCCATTTGATCATCTAAAGAAAGCCACAAACGCTATAGTCGCTCAAATAGGCAAGGACCGAAATAT  
TTAACTATGAATCACCAGTATTCTCCTTAATTCCTTATTAGATTGGGCATGTGAAATGGTCTTGGAGTAGTTGTATACCTAT  
TTTATTTCTTGTGGCTGCTCTGTGGCTAGCAATTCTATTGGTCTGTGTTAATCTTTATTAGTGAAACAAGTTAAACATTTGT  
ATTATGTTGTTGCTGACCTAACAAAAGTTTAAAGATTTTGTTATTCATAATTTCATTATATGGTTTTTAAGTAAATACATTT  
TCTTGTTAACAGAATGTAGTCTACTAGCCAGATGCATGTAGTCAATAAGTGATTTTTTGATTTCATCAAAAAAAAAAGATTGGG  
ATCCACCAGAATTTGATCTTTTAAACAAAAACATCGTTTATGTAATTTGTTATGTTAGACGTAGCAAAAATACATGTTTCAGTCA  
AGTACCCCGTGATGACTTGTACCCGCCTATCTTGCGTCTTCTCTCTCGCAACCTCAAGCCACATGGATCTCCACGAGCACTC  
CGATCCATTAAATCTCTCTCATCAAGAAAAACAAAAAGGACCACTCTGTGCAAAACCTGATTAATCCATGGAGCCAC  
GAGCACATGCATGCATATGGTGTGGTCTACGCCTAAGACCGGCCAGGCTCTCTCCAACCATGATTAATTGCGTCCACGACC  
ATCTGCTTCAACCTGGGAATGCTTCAGTTGAGCTAACAGGCATCAAAAGCATACTATTCCGATAACGCGGTGATTTTAGCAT  
GGGCGACAGCTCGCACGGCTGCACTGCACGTCTGCACGGCTGGTCTTCTGTTGTCAGGCCCGCGCGGTGGGTGATGACCGGT  
GACCAACAACGACGACGAGGACACGCCGGCGCGCGCGGCGGCGGCGGCGGCGGCGGCGGCGGCGGCGGCGGCGGCGGCGG  
GACCTGTCTGAGTACAGGTACAGTACCGATCTGTACGCGCAGCGCAGATGCCGCGCGCGCGGCGGCGGCGGCGGCGGCGG  
GGCCACAGGGTTCCGCGCCCGGGGACGATCCCAACCGACTGGCGGGCGGTTCTTTTTACGCGCGCTCTTTAGCCCCGCTG  
ACAGGTGCGCGCCAGGCTTCGCCCACTGACAGGTGGCATCCGCGGTAGGTGGGGCTACATGTCATTGAAGTCCCAGGCGG  
ACGACCGCAACGAGCCAAACGGCGTGGAGGGGTTTTGATTTTTGAAAAATGAAAACAGGAAGGCCACGGCCACGGGCC  
CTACAGGTACACGTATGCTGGGGCCCACTCCCTGACGCGGTGGGCGCGGGCGGCGTACGCCTTAACACCCCCCTCCCTCCG  
TCTTCTTCTCTCTCTAC

>SsLRR-RLK202

CTAGATAGCCGCCCTGCGTGCTGCGCCCTGGAGCTGCCCGCAGCGACACGGCCGCCCGGTACGGCAACGGAAGGCCAA  
GGGGAGCTGCCTAGCCAAGCTAATGGGTGCCGCCGCCCGCTCCGCCTCTCTGCTGCTCCCCCTCTCTGGGCCCTTGGC  
TGCAGCCGCAATGGCGGCCGATGCTCTCGGCGCAGACGTGCTGCCGGAGCAAGAGGTGAGCCACAGCACGTCCCCGA  
TGCTTCTCTTGATCTTGGAGCTCTGCACCTGTTCTCGGATCTACTGTTGCAATTTTTCTCTCATCCGGTGCGCGTAATTTCT  
GGAAAAAACATGGGAATGCTTCAGTTGAGCTAACAGGCATCAAAAGCATACTATTCCGATAACGCGGTGATTTTAGCAT  
TTTCCAAGAACCATCGATGCATTTTCTTTTGAATATCGATACATTTTTTATACAAGAAATTGGTGAATGGCTAGCTGTTTC  
CTAATGACGGTGTCCGACGGGATATATATGTGTATATGATTCCGGCGCGGATTGAATTTACTACTGCAAGTCTCGCAAAAA  
AAAAAGAGAAATTTACTACTAGGCGACGGCACATCGTAGTTGCTTAATAGGAATTACGATGGTCAAAATATGATGAC  
AGCGAGGTTATTTTATCTTTGATTATCTTTTCACTTCACAAAGTGGCTGAGTTTATGCTGCATAAACTTTGGCTTGTGCACT  
CCACGTGCGACAGAAGACCGCCAATTTGTTCTGGAACCTGCTTTAACGCTTTGGTATTGTTCCGTGCGGTACGCACTGT  
TCGATTCTCCCGTGGGCGGATGAACTCAGCAACTTCGACTTGTTAGACCGTGGGTGAAAAAGTTTTTTTTACATCGAATATT  
TTATAGGATGTTAGAAAATGTGTTTCGTATATAATAAAAGTACTAATTACATAACTCGTCTGCCGCAAAACGAATTTATTAC  
CCTAATTAATCCATCATTAGCACATGTATGTACTGTAGCAATTATGGCTAATCATGAGCTAATAGGCTTAAAAGATTCTGCTCGT  
AAAATCCATATAAATGCAATTAATTTTCTTATCTATTTAATACTTATACACGTGCAAAACATTCGAGGAACGTGG  
TGAAAAATTTTAGCGAGACTAAACAGGCGCTCTTGGCGTTGGACGGTTAGTGGTCCCGTACCGCTCTGTAATTTGT  
GCGCAGGCATGGCTGAGCAAAATCGTTTCTAGTACTTCTCTGTCTGATTCTCTCTGCCAACTAGTAGTATTTCAATGGT  
CTTGGTAAGTCTTGGTAATGAAAAATTGCACTGTTCAAGTATGACGAGTTTCTAATACTTGCTGCCACAACAGGGCACA  
GATGCAAAATGTTGTCGTTACCAGGGTTACTAGTGCAAGATAGCAGCTTTAATTCAGTGAAAGTGTGAACCTCGTCACGTCG  
AAGCCTATGCTTCCGCGTTGTTTAGTTAGTGAAAAATTTAGTTTCGGCTACTATAGCACTTTTCGTTTTTTTTGGTAATTT  
GTGTCCAATCATGGACTAATTAGGCTCAAAAGATTGTCTCATGATTACAATAAAGTGTGAATTAGTTTTTCTCTCATCT  
ACATTTAGTACTTATGCATGTGCCGCAAGATTGATATGACAGGTAGTGTAGCACTTTTTGGGTTCTTTTTAGAACTAAATA  
GGCTTTCGTAAGTATGCTGCTTCCCACTTGCCGAGCGCAAGTAAAAAAACCGTGTACGGGACAAATTCACCTT  
TGAGGCTCTCACTTTGACAGCGGTGTTCCGTGTTCCGCTTCAACATCCATCCCACTTGCGCGCGGTGGGACATGCATG  
CCAAAGCTGTTGGGCGTTGGCAGGTGGCTGACCACCTTGCTCTCTGTCTCTGGTCCAACGGGTGGGGGCTGCCAAGTG  
TTTGACGAA

>SsLRR-RLK278

GAACAATTTATGGAACAATTACTAATATTTAGGACACCAAATAGATGAACATATATAAAAAATAAGTTTCAATCTGAATTTAGTGA  
TACATTCGGTAATATAAATATTAGTATTTGTATATAAATTTGTTAAAAATAAAAAAGTTTGACTGAGAACAAAATAAAAACA  
TTATATTTTTTAGACATAGGTTCTAATTAATATAAAAAATCCATCCCGTAGTAAGTACTAGACACCATATGTCTAGAAAAACGA  
TGTAATAATCAAAAGTTTTCTGTTCTATCCAAAGTAGATGCTTTAGCTTATTTGCAAAATGTTAGTCAATCTTTTAAACGTTG  
ATCTTCATCCAAAAGAATACACTTCTAATATTGTGCTAAGTCAACATCTTAAGTTTGATCATTTCTTTACAAAAATATACAA  
ATAATTTATGATGAATAATCATAATTAGATTCAATATGAAATATATTTTTGAATATGCATATTTCAAATTAATTTGTTAATATCATT  
TTTACAAACTTAATCAAACTTAAATATAGCTTGATTTTAAACCAATTTCTAGAAGTATGCTCTTTTTGGTGGAGGGGACCGCT  
ACAAGGTTCTTATTGTTAATTAATTAATATATTTCTAGTGCCTTTGTGTTGGAATGGAACATACAAAACTTGTGTCACGGTC  
ACTTAAAAACAATTTGCGGCTCTAAAATTTATTCATCAATCATGTCTGTTCTAATATATCTTGAAATCAAACCTGTACTATG  
GTTGTACACACTAACAGGTATGAGCAATGGTTATGCGTCCATGTCACAACCAAGGAAGGTGCGCTAGGAGACCTAGGAAGT  
AAAATACGATGGAAACCTGTCCAGGTTTGGAAACGCAAGAATTTACAGGAATTACGTAAGAATCAGTTCACTTTTACCGG  
AAAAACGAAGGAACCTAGAAAAATTCCCATGTTCCAGACAGAGCCCGAATACTTTGGTCTCGTTTAGTTCCAGGGTGTA  
AGTTTTAGGTATCAGTGGGTGTACGTGAGGATGTCGATGGGGTGTTCGGATAATAAAAAATAAATACAGAAATCCGC  
CAGTAAACCCGAGACGAATTTATTAAGGCTAATTAATCTGTCTATAGCATATGTTTACTGTATTGTCAATCTAGTCAAT  
TATGCTTAAAAAGATGCGTCTCATAAAGTAGTCGTAACCTATATAAATTAGTTATTTTTTAACTATATTTAATCTTATGCATGTG  
CTAAACATTCGATAGGATATGATATATTTTAGGAAGAAATTAACAAGACCTTTAAGACCTTTGTGCACTTGTCTTGTGGTA  
AATTTGCAGTCAAACTGAAACGCACCCACTGACGCTGGACACACCGCTTCCGTTCCGGACCGCGCTTGTGGCTTTTG  
TGGACACTGAAACCCGTGCACTGACGTCACGACCCCGGCTCTACTGGTAGCGGTAGCACTAGCAGCAAGCAATGGCTG  
ATCTCACTCGTAAAGCATGATGATCGACACACCGCAATCAATCTGTGTAACCAACGCAACGCTCACCCGTCCCAACGGTA  
GAATCAGTTAAACGACACATAAATATAGGAAATAGAAAAATGCCCATGTTCTAAAGAGGACCTAAAATCTGAATCCAGTTCC  
TTGCTGCTCTTCAACAAATTGTACTACTAGTACGTAACGTATATTATACGAGTACGAAAAAATGGGAGAGAGTAGAG  
GACGCAAGCGAAGCAACAAGCAAAAGGCATGGAACCTCAAAAAATGCCAGGTGGGGCCGGGCGGATTAGGACGAAAAGCAA  
AGGCAGGGAAAGCATTAAAGCAAAAGAGGAGAGAGAGAGAGGGGAGAGGGGAAAGGAGGCTAGATCGAGGGAGAGAGGG  
ACGGCCCGGATTGCTACGGCTCCATCGCAGCGAGAGAGAGCTTGAAAGCGTGCTTGCTGCCATTCCAGCTTCAATTC

CTTTCCTTC

>SsLRR-RLK301

CTAATATTGTGCTAAGTCAAATATCTTAAGTTTGATCATTTTCTTTACAAAAAATATACAAATAATTATGATGAATAATCATAATT  
AGATTCATTATGAAATATATTTTGAATATGCATATTTGAAATTATAATTGTTAATATCATTTTACAAACTTAATCAAACCTTAA  
ATAGTTTGGTTTAAACCAAACCTCTAGAAGTATGCTCTTTTGGTTGGAGGGAGTACGCTACAAGGTTCTTATTGTTAATTAAT  
TATATTTTCTAGTGCCCTTTGTGTTGGAATAGAACATACAAAAGTTGTGCACGGTCACTTAAAAACAATTTGCGGCTCTAAAA  
TTTTATTCATCAATCATGTTATCTGTTCTAATGTATCTTGAAATCAAATACTATGGTTGTACACACTAACAGGTATGAGCAATGG  
TTATGCGTCCATGTCAACCAAACAAGAAGGTGCGTAGGAGACCTAGGAAGTAAATACGATGGAACCTGTCCCAGGTT  
TGAGTTCTTGACCCGTGATAGTATTTGAAATTTGAGGGCCTATTTGGAACATAAGAATTTACAGAAATTATGCAGAAATTTT  
ACAGGAATCTGTTTCATTTTTCACAGAAAAAACAAAGGAACGTGAAAAAAATTCCTGTTCCAGAGAGCCTGAATACTTTGT  
GCACCTGTCTTGTGGTAAATTTGAGTACTTTGCAGTCAAACCTGAAGGCACCCACTTGCACGCTGGAGTGCTGGACACCAC  
GCGTTCCGTTCCGGACCGGCGCCTTGTGGCTTTTGTGGACACTGAAACCCGTGCAGTCACGTAAGTCCACCCGCGGTCTAC  
TGGTAGGCGGTAGCACTAGCAGCAGCAATGGCTGATCTCACTCGTAAAGCCATGATGATCGACACACCGCAATCAATCTGC  
TGAACCAACCGTCAACCGTCCCAAACGGTAGAATCAGTTAACGACACATAAAATATAAAAAAGTATCTCATGTTCTAAATAAAG  
AAAAAAATGTAGGAAGTAGAAAAATGCCCATGTTCTAAGGCCTTGTTCATTAAGTTTTCACCTCTCTCCATCACAT  
CGAATCTTTGAACGTATGCATAGAGCATTAAATGAAGGTAATAATAAATTTGTACAGTTTATCTGTAATTTCCGAGAGCAATC  
TTTTATGTTAGTTAGTTCATGATTGGACAATAATTGCCAATAACAAACGAAGGTGCTACAATGCGATGAAAAATTTAATCT  
CAATGTAAACAAGGCCTAAAGAGGACCTAAAACTGAATCCAGTTTCCTTCGTCGTCCTTCAAAAAATCGTACTACTAGTATAG  
TAACGTACTCCCTCCGTCCATAAAAAACATGCAATTCTCGTTTTTCGAGAAATCAAACAGGTTCAAGTTTAACTAAATTTATATA  
AAAAATACTAATATTTATGATACAAAATAAGTATCATTAGATTAGTTATAGGATATATTTTATAATAAATTTATTTGGAGACAT  
AAATGTTAATACTATTTTGGCTATAAACTTGGTCAAACCTTGAGTCTGACGTTTGTGACTGGCAGCATCCCAATTTGCATCTTTCTCG  
ACGGAGGAAGTATATTATACGGAGTAAGAAAAAATGGGAGAAAAATAAGACCAAGCGACTGGGTGGAGAGAGAAGAGTA  
GAGGACGCAAGAGAAAGCAACAAGCAAGGGCATGGAACTCAAAAAATGCCAGGTGGGGCCGGGCGGATTAGGACGAAAAAGC  
AAAGGCAGGGAAAGCAAAAGAGGAGAGAGAGGGGAGAGGGGGAAGGAGGCTAGATCGAGGAGAGGCGGCGGCGGCGGCGG  
CGATTGCTACGGCCTCCATCGCGGCGAGAGCTTGAAGCGTGCTTGCTGCCATTCCCAGCTTCCAATTCCTTCTCTCTCT  
TCTTGCTCGTCCACCCAGTACTCCACCCTGCCCATCCTCCTCCTCTCTCCCTCTCCCTCTCCCGCCACCCCATCCCTGC  
GACGACGCGCAC

>SsLRR-RLK291

CGGTTCCCAAGTTTGTTCATTTTCATCACGAAAGAACTATCTTTATCTCGAACAATTTATGGAACAATTACTAATATTTAGG  
ACACCAAATAGATGAACATATAAAAAATAAGTTTCATGCTGAATTTAGTGATACATTCCGTAATATAAATATTAGTATTTGTATA  
TAAACTTTGTAAAAATAAAAAAAGTTTGACTGAGAACAAAAATTAACACATTATATTTTATAGACATAGGTTCTAATTTAATATA  
AAAAATCCATCCCGTAGTAAGTACTAGACACCAGATGTCTAGAAAAACGATGTAAATCATAAGTTTTCTGTCTATCCAAAG  
TAGATGTCTTTAGCTTATTTGCAAAATGCTAGTCAATCATTTTAAACGTTGATCTTCATCCAAAGAATACACTTCTAATATTGT  
GCTAAGTCAAATATCTTAAGTTTGATCATTTTCTTTACAAAAAATATACAAATAATTATGATGAATAATCATAATTAGATTCATTA  
TGAAATATATTTTGAATATGCATATTTGAAATATAATTGTGTAATATCATTTTACAAACTTAATCAAACCTTAAAAATAGTTTGG  
TTTAAACCAAACCTCTAGAAGTATGCTCTTTTGGTTGGAGGGAGTACGCTACAAGGTTCTTATTGTTTAATTAATTATATTTTC  
TAGTGCCTTTGTGTTGGAATAGAACATACAAAAGTTGTGACCGGTCACTTAAAAACAATTTGCGGCTCAAAAATTTTATTCAT  
CAATCATTTGATCTTGTCTTAATGTATCTTGAATCAAATCACTAGGTTGTACACACTAACAGGTATGACATGGTTATGCTGCTC  
CATGTACACAACCAAACAAGAAGGTGCGTAGGAGACCTAGGAAGTAAATACGATGGAACCTGTCCCAGGTTTGAGTTCTT  
GACCCGTGATAGTATTTGAAATTTGAGGGCCTATTTGGAACATAAGAATTTACAGGAATTATGCAGAAATTTTACAGGAAT  
CTGTTTCATTTTACAGAAAAAACAAAGGAACGTGAAAAAAATTCCTGTTCCAGAGAGCCGAATACTTTGTGCACTTTGT  
CCTTGTGGTAAATTTGAGTACTTTGCAGTCAAACCTGAAGGCACCCACTTGACAGCTGGAGTGCTGGACACCCACGCTTCC  
GTTCCGGACCGGCGCCTTGTGGCTTTTGTGGACACTGAAACCCGTGCAGTCACGTAAGTCCACCCGCGGTCTACTGGTAGG  
CGGTAGCATAGCAGACGCAATGGCTGATCTCACTCGTAAAGCCATGATGATCGACACACCGCAATCAATCTGCTGAACCA  
ACGCTCACCCGTCCTCAACGGTAGAATCAGTTAACGACACATAAAATATAAAAAAGTATCTCATGTTCTAAATAAAGAAAAA  
ATGTAGGAAGTAGAAAAATGCCCATGTTCTAAGGCCTTATTACATTCAAGTTTTCCTCTCTCTCCATCACATCGAATCT  
TTGAACGTATGCATAGAGCATTAAATGAAGGTAAATAATAAATTTGCACAGTTATCTGTAATTTCCGAGACGAATCTTTTATAG  
TCTAGTTAGGTATGATTGGACAATAATTGCCAAATACAAACGAATGTGCTACAGTGCGATGAAAAATTTTCACTCCAATGTA  
AACAAAGCCTAAAGAGGACCTAAATCTGAATCCAGTTCTTCTGCTCCTTCAAAAAATCGTACTAGTACAGTACAGTCAACGT  
ATATTATACGGAGTACGAAAAAATGGGAGAAAAATAAAGATCAAGCGACTGGGTGGAGAGAGAAGAGTAGAGGACGCAAG  
GGAAGCAACAAGCAAGGGCATGGAACCTCAAAAAATGCCAGGTGGGGCCGGGCGGATTAGGACGAAAAAGCAAGGCAGGGA  
AAGCAAAAGAGAGAGAGAGAGAGGGGGAGAGGGGGAAGGAGGCTAGATCGAGGAGAGAGGGACGGCCCGCGATTG  
CTACGGCCTCCA

>SsLRR-RLK94

TCACTGAGGCGGTGTTTGGATGTAGAATCTGACAACATCAAACAACACCTAAAGGTTTATGACCTTCCGTCCAAACCTTGAA  
CACACAGAAGTTTCTCTAAACAACCTCCACAGTTCTTCAGTGAAATCGGCACGTTCCCGTACGTTACGTTCTTTAAGAAAA  
AAGGGGTTGTTCTATTTGTGAAAAAACGGTGTCCAATTTTTTCACTCGCCATAGAGATGAGCTTGTGTAATTGAAGAACA  
AAAACAACCGAAAAAGCGCTGTGCGGAGGGCACTTTTCTTACCTTGACTGGATCACGGATCGCAAAAGCTGGCTTTCGGC  
GACGAGTATAACCCACACGTACGCACGTACTCTCTCCCAAAATAAAAGTCATTCTCGCTTTCAAAAAATCAGTTTTT  
TTAAACTTTGACATATTTATATATAAAAAATATTAATTTTATAATACATAAATTAATATTATAGATGGATCGTTGAATATCTTTA  
TAATAAACTATTAGAGATATAAATGTTGCACGTATTTCTATAATCCAGTTAAAGGTAAGAAAGTTTGATCTGCACGTAGC  
CCATAACGTATCTGTTCTGGGATGGAGGAAGTACTACACGCCCCGCGTATACCTCCACGGCTCTCCCCCTCTACGCGTCGTC  
GACCCCGTATGGCCGAGCCCCGCCAACAGTGCTCTGACAGTGGGCCGCTCCAGGCATCTCCACCCCGCTCCGCGAGCC  
CTGCTCGACGAAATGCCAGCGCTTCCGGTCAATGGCGCCCGTCGCCCGCGCTGTTGACCCCGCGCGGGCGCGCCCTGT  
CCTGTCTCCACAGTGCTCGCCCCATAAAGCTCCTTGATCCCTTCTCCCTGCAGCCCCCACAGTGCCACTCACTCGCGGC  
CACCACCCCACTACCACACCCCGCGCCCTGTTGCGGACCAGTGTCACCACTCGCCCCGCCCCCGCGCATGCCG  
GCTGTCCGGCCTCTAGTGGCTACTGGTACTGGGTGGTGTGGGGGAGGGGACGAGACGACGAGCTTCTCGGTTGCCG  
CTACCTCTGTCTGTCTTCCATGGCACTCTGCTCCTCGCTCTGTATAGTTCTGCGCTCTCGCTCCAGCTGCTGGGCGG  
GTTCCGCTTCTTGGCGGTTTGCTTAGGATGCGCGCGGGCGGGCGGCGCAATGGCGTCTTGTCTCCGCGCGGGCTCCTCT  
CTTGCTCTCTCAACTCTCGCGCGCGGAGTCCGAGGGGTGCGCGCGCGGCTGCTGGAGTTCAAGGCGCGCT  
GGAGGACGTGAACGGCCGCTCTGACCTGGGGCGCGCGGGCGCGGGCGTGGACCCGTGCGGGTGGGCGCGC  
ATTGCTGTCTCGCGCGCGGCGACGTGACCGCGCTCACGCTCCACGGCTCAACCTGCACGGTGGCTCTCCACCGCGCT  
TGCAGCTCTCCGCGCTGGCCGTGCTCAACGTCTCCAAGAACGCGCTCAGCGGGCCATCCCGCGGGCTCGCGCGCTG  
GCCGCGCTCGAGGTCTCGACCTCAGCACAACGCGCTCCACGGCGGCTCCCGCGGACCTCTCGCGCTCCCGCGCTC  
CGCGCTCTCTCTCAGCGAGAACCTGCTGTTGCGGACATCCCGCCCGCATCGGCAACCTACCGCGCTCGAGGAGCTC  
GAAATCTACAGCAACAACCTCAGGGGACGATCCCGACCTCGCTCCTCGCGCTCCAGCGGCTGCGGGTCACTCCGCGGG  
CTTAACGAGCTCTCCGCGCCATCCCGCTCAGGCTCAGGAGTGCAGGCTCGAGGTGCTCGCGCTCGCGCAGCAAC  
CTCGCGGGGAGCTTCTAGGGAGCTCTCGCGCTCAAGAACCTCACACATTGATCTCTGGCAGAACCTCTCGGGCG  
AGGTGCCGCCGAGCTCGGCGAGTGCACCAACCTCCA

>SsLRR-RLK75



TTAATTAACAGTAAACGGTTCTATGTAGCATTTAAACGATGGTAAACAGGGTAATAATGACC GTTTAGATGATCAGTGATTT  
TATATTTACACATGTCATGATGATAAATTATGGGGATCACTCCCTCTTTACCTAATTAATTTGCTAATAATCTAAGACAAAGGTT  
TAGTTTGGTTTTTTAGAACCAAGATCGAAAGTTATAATAAGTAATTATATCTCGCCTTTGAAATCTCACCCACTCTCACCGTACGT  
GCAGCCCCACAGTTTCATCTCCAACCAACCGCCAGCTGCATAGATCATCTAACCTTCTCATGTGCCATGGCCCTGCCACCAGTT  
CCATAACCACTCCAACCACCTCTTCCTCCCCTCACACCCATATCAGGTGAAAGTGCACCAAAATTTAAGAAATGGCGCAAAT  
TCACCCAAAAGCATACTTTGAAGTTTGAACAATTTTGTAACTTGCCATCTCTAGTTCATTATAGATTGATGTGATTTTTG  
TCGCAAAAGCTGAGACAAAACTCATTTTAAAAAGAAACGACATGAAAATTTGGGGCTATATATGAAAAAATGTCAAATTTG  
GGATGTACATTTAGAAAATTTAACAACTTTTGTGGAAAGCAGCGCTTAAAGTGAATTTGAATCTATTTTCCAAAAACAAAA  
ACTAACAAATTTTCACTTGATATGCACCCCAACGTCATCGCCTTATTTACACTCTGTTTTAATTTACCTGACCAAAACCATCAG  
TCACCGATAAAGAATTTGTATGCGTACATATATCATCTATGGTTTGTAGAGTAAATCCAATCATCACTAAAGGATTGTGACA  
TTCTGTCCAAAACCTTCAACACTGTAGAAGTATTTTTTTCTGTGTACGAGAGCTACGCATATTTGTATTAGTATAAGGTGTTAA  
GTGAATTTGAATCTATTTTTCTAAAAACAAAACTAGCACATTTTCACCTCATATGCATCCCCACGCCAAAGCCTATTAAACTC  
TGTTTAATTGTACTCGAGCTATCACCAACCATCACAGTCACTGATAAAGAAGTTAAGATGCATACATATCATCTATGGTTGA  
GAGTAGAATCCAATTCATCACTGAGGCCGTGTTTGGATGTAGAATCTGACAACATCAAAACAACACCTGAAGGTTTATGACCTT  
CCGTCCAAAACCTGAACACACAGAAGTTCTTCAAACAACCTCCACAGTTCTTCAGTGAAATCGGCACGTTCCCGTACGTT  
ACGTTCTTTAAGAAAAAAGGGGTTGTCTATTTGTGAAAAAACGGTGTTCCAATTTTTTCACTCGCCATAGAGATGAGCTT  
GTTGAATTTGAAGACAAAAAACACCGAAAGCGCTTCGCGAGGCCACTTTTTCTACCTTGATGGATCAGGATCGC  
AAAAGCTGGCTTTTCGGCGACGAGTATAACCCACACGTACGCACGTACGTACTCTCTCTCCAAAAATAAAAGTCATTCTCGCT  
TTCAAAAAATCAGTTTTTTTTAACTTTGACTAATTATATATAAAAAATATTAATATTTATAATACATAATTAATATTATTAGATGGA  
TCGTTGAATATACTTTTATAATAAACTTATTTAGAGATATAAATGTTGCACGTATTTTCTATAATCCCAGTTAAAGGTAAGAAAG  
TTGATCTGACAGTACGCCATACGTCTGTTCTGGGATGGAGGAAGTACTACACGCCCGCGTACCTCCACAGCTCTC  
CCTCCTCTACGCGTCGTCGACCCCGTATGGCCGAGCCCGCCAACAGTGTCTCTGACAGTGGGCCCGTCCAGGCATCCTCC  
ACCCCGTCCGCCAGCCCTGCTCGACGAAATGCCAGCGCTTCCGGTCAATGGCGCCCGTCCGCCGCGCTGTTGACCCCG  
GCGCGGCGCGCCCTGTCTGTCTCCACAGTGTCTGCCCCATAAAGCTCCTTGATCCCTTCTCCTGCAGCCCCCAC  
AGTG

>SsLRR-RLK137

TTAGTAATTATATCTCGCCTTTGAAATCTCAACACCTCTCATCCGTACGTGCAGCCCCACAGTTCATCTCCAACCAACCGCCA  
GCTGCATAGATCATCTAACCTTCTCATGTGCCATGGCCTTGCCACCAGTTCCATACCCACTCCAACCACCTCTTCTCCCTCA  
CACCCATATCAGGTGAAAGTGCACCAAAATTTAAGAAATGGCGCAAATTCACCAAAAAGCATACTTTGAAGTTTGAACAA  
TTTTTGTAACCTTGCCATCTCTAGTTCATTATAGATTGATGTGATTTTGTACAAAAGCTGAGACAAAACTCAATTTAAAAA  
GAAACGATGAAGAACTTTTGGGGCTATATATGAAAAATGTCAAAATTTGGGATGTACATTAGAAAATTTAACAACTTTTGTG  
GAAAGCACACTTTAAGTGAATTTGAATCTATTTTCCAAAAAAAACACAGAAATTTTTTCTGTGTACGAGAGCTACACAT  
ATTTGTATTAGTATAAGGTGTTAAGTGAATTTGAATCTATTTTCTAAAAACAAAACTAACACATTTTCACCTCATATGCATCC  
CCACGCCAAAGCCTATTACACTTTGTTTAACTTCTACTCGAGCTATCATCGACCATCACAGTCACTGATAAAGAAGTTAAGAT  
GCATACATATCATCTATGGTTTGTAGAGTAGAATCCAATCATCTTATTTGGATATAGTTGGATTTCGCATCAATTCAGATGTTT  
GGGTGGATTGAAGTGAATTTGAACTAAATTAACCTCTAATCCATTCCAACGCACGTGGATTGAGGTGAATCCGGCAACAT  
CCAATTCAAGACATGAAGTTTATGACCTTCCGTCCAAAACCTGAAACACACAGAAAGTTTCTCAAAACACCTCCACAGTCTCT  
CAGTGAATCCGATGATGCCCCGTACGTTACGTTCCCTTTAAGAAAAAGGGTTGTTCTATTTGTGAAAAAACGGTTCCAAT  
TTTTTTTCACTTGCCATAGAGATGAGCTTGTGAATTTGAAGAACAAAAACACCGAAAAAGCGCTGTGCGGAGGCCGCTTTT  
TTCTACCTCGACTGGATCACGATCGCAAAAGCTGGCTTTCGGCGACGAGTAGTCGTAACCCACACCTACGCACGTACGTG  
CTCCTCTCTCCAAAAATAAAAGCCATTATCGCTTCTGAAAAGTCAATTTTTTAACTTTAACTAATTATATATAAAGAATAT  
TAATATTTATAATACATAAATAATATCATAGATGGATCGTTGAAATATATTTTATAATAAATTTATTTAGAGATATAAATGTACA  
CGTATTTTCTATAACCTAGTTAAAGTTGAGAAAAATTAATGTGCACGCATCCCATACATCGACGGAGGGAGTACTCCTGCA  
CGCCCGCGGTATACCTCCACGGCTCTCCCTCTCTACGCGTCTGTCGACCCCGTATGGCCGAGCCCGCGCTCATGTCTCTGAC  
AGTGGGCCGCTCAGGCATCTCCACCCCTGTCGCGACGCCCTGCTCGACGAAATGCCAGCGCTTCCGGTCAATGGCGCTTCCGCG  
CGTCCGCCGCGCTGTTGACCCCGCGCGCGGGCGCGCCCTGTCTGTCTCCACAGTGTCTGCCCCCATAAAGCTCCTTGAT  
CCCTTCTCCTGCGCGCCCCACAGTGCCACTCACTCGCGGCCACCACCACCACCACCACCCCGCGCCCTGTTGCGCG  
ACCAGTGTACCCACCTCGCCCCGCCCCGCGCATGCTGCGCTGTCCGGCTCCTATTGGCTACTGGTACTGGGTGGGTGTTG  
GAGGGGACCGGACGAGACGACGGCTTCTCGGCTGCGCTCAGTCTGTCTGTCTTCCATGGCATCTGCTCCTCGCTCCTCGCTCTG  
TCATAGTTCTGCGCTCTCGCTCCAGTGTCTGGCCGGGTTCGCTTCTTGGCCGCTTTGCCTTAGGATGCGCGCGGCGCG  
GCCGAATGG

>SsLRR-RLK74

AGATATATTTTTCTTAGCAGAATGTAAATAGATATATAGATGTGTTATAAGTACCTTCGGAAAAAATTAATAGAACTAGGGGTG  
GCCCATGAGTGCTTATTTATACAAAGATATATAGCGCTTCCTTCAGTCAATATGAGTGATATTTGGATAACGACATAATCTCC  
AAAAGAACTTTAACTAATAGGTTTGTCAAAATGTTTATGAAATATAGCAAGAATATACTTTTATTAATATATTTCAAGGAA  
AAAAGCCATCCATTAATAAATCAACATATACAAATACATGTCTACCACAAAATGTATATGTCCTTATCTGTACTAGTG  
TAGAGGGATTATATATAAAGGCCTAGCTTTTGATATATAATATAACATTGTATCGTCATGGATTATCATAAGTATCGTTAGATT  
TATAATGAGATATATTTTATAGTATACCTATTTGATCAATGTCAATAACGTTAATTTTTTACTTATATATTTGGTTAAATGTTAGTA  
ACTTAAAAAAGAATGCACCTAGAGTTGCATTCTGTTTTGGGACCGAGGTAGCACATCAAGAGATAATTTATTTGAAATACA  
GAACACGATGAGGATCCATGGAACCATCAATTAACACCTTGGTAAATATAGAAAAGGATCTTATTGGTGTGAGATCTGACCTGA  
ATGCAAAACAGCCACCATGTGCAGCATGGAATGGTCTGTACTCGAAAGAAGGTGGATTAGGAGTGCTTAATCTCAAAAT  
TCAAAATGAGGTCTTATAATGAAAGATCTGCATAAATTTCTCAATATCATGTTTTAATTAATGGAGTCAATCATCACTCCCAAT  
TCTAGAACCCTTTTCGGCAGCAACTTCAAGTGCCTTTCTTCTGGAATAAATAGTACTAATATGCTAGATCAITTTGACTACAAG  
GAATGGAAAGATCTTTAAACAATCAGCACTAACTTTGGCTTCATATAAAGTGTGAGATTGAATTTCAATAAAGATTTTCAGCAT  
GGTTATTCATAGAGCAAGAGTAGATTTTTTTTTGACAAGTTGTAGATTGGCTTGAATCCTTGTAAATATATGTAATTAACCTGC  
TCTTTACTTTAATACAATTTTCAGTAAGGGAGAAGGCCCTCTGTCCATAAAAAAATGAACTTCAATGCTTGAATGAA  
TGACACTATATATGTGCATTAATATAGTCAAATGATGTTACATTTTACTGTTGGTGTAATTTTCTCCCGTCACGACAAATGG  
TGGATAATTTTCTATGTGCTGCTAGCTTGTGTCATCTTCTCTTTTTTTCGATCTGTTTTTGTTAACAGCACGTCAGCACTCC  
GTATTTGATCAGGTATATCCTATGTACTTCTCAACATATGCGTGTGCGCATACATCTCTGCATTGGCCACCACCTTTCTCTGTGC  
CTGTGTTGTTGGATGTTCCCGTCACTGTAACGTATGATCAGATGAATAGTCTTGTGCGGTATGCTTATCAGTGAACCTGTA  
TCACTGGTTGTTTTCTGCTGATCGGCAGTGTCCCTGCATTTTCCCTTTCAGTGCACAGTTAGCGCTACTCCAAGACAACCTGTA  
TAACGGGTGCATCAGTGCCNNNNNNNNNNNNNNNNNNNNNNNNNNNNNNNNNNNNNNNNNNNNNNNNNNNNNNNNNNNNNN  
NNNNNNNNNNNNNNNNNNNNNNNNNNNNNNNNNNNNNNNNNNNNNNNNNNNNNNNNNNNNNNNNNNNNNNNNNNNNNN  
TTTTATAATCCTAGTTAAAGGTGAGAAAATTTGACATGATGATCCATAACGCCATCTGTTCTGGCATGGAGGAAGTACTA  
CACGCCCGCGGTATACCTCCACGGCTCTCCCTCTCTACGCGTCTGTCGACCCCGTATGGCCGAGCCCGCCAACAGTGTCTCT  
GACAGTGGGCCCTCCAGGCATCTCCACCCCGTCCGCCAGCCCTGCTCGACGAAATGCCAGCGCTTCCGGTCA

>SsLRR-RLK262

ATTCTTCAATGGTGAAAACTCAGATTAGTCTTTCCAAGTTACTGTTCAAAATCGGTGTATTTAAAGGTATGGATGAATGTATAA  
ATTATTGCTGAATCAGGAGGTATTACTTATGAGGCCTAGGTAGCTGTCTATTAGTTAATTTTGTCAATAAAAAGGCAAGT  
AAATAAGGGGACCTAGCTATGCAAGAATAGTGTAGTTAAATAAGGACCAGTGCATAGTGTTTTTCACTCTAACTTGATCTTAC

TTGACAACATTTCTAGTTTAACTTATTAGTTCCTTAAATGTTTTATGACACCTGTTCCCTTTCTGCCTAGTTTTTCTTAAACTTCA  
AAAATGCCAACACACAGCAAGGATTTCAAATATGCTCGTAGAGTTGACATCCTAGGGTGTATATACATAGCCCCAAGAAA  
AAGCCGCTTGCAGCTAAGATTGACATTTTTTTCACATGGTTTTCTGTTGTTCACTGGGTGAACGTGTTCAITTTCCCTAITTCAGCAAT  
AATTTGATGCAGTTTTTATTCTAGATGCAGTATATATTTCTGTCCCTTGCTATTGCTGTTATTGCTTGATCAGATATTCATTTCAGA  
TCATCAGATACGGAAGAAGTGCATATAGCAGCCTTGCAGGGCAATTTAAACAATTCATATTCACTTGTGATTCTTTCTCTGAC  
TGTGTTTCAGCAGCCTTTCAAACGTGTCAACTCTCTGTCAATTAACCCATTTAATTACATTGCTAGTAGTACTTCTGTTCCC  
TTTTCATCTGATGCATGTAGGTGAGGTGACATTCTACTGGGGACATGTGCCAAGCAATGCTCAAAGGATCCCCCTGTGCAGAC  
AAGAGCAGTAACAGCAGCAGCAGCAGCTACTGCATGCATGCCCACTGTCACAGGAATGATTACGCAGGTTTTATTTTAAACA  
GGTCAACTTGGGCAGACTCAACACATGCAGTGCACCACTGTACATATGCTTAGGCAGGGTAAACTTTCTTTAGTTGTTTATAT  
ATGCATGACATGTGTCCAGATCTCTTAGCTAGTTAGGGTGCTTGCATCAGGACAACACCAAGAACATACCCCTCCACCCCTCTT  
GTCTCCCTTTGGGTAAATCTTTTCTTTTAGAGCCTGCAATGGAAGCATCCTGTTCTACTGACTGGTAACTGACATAGGATTAG  
TACTGTTTGTGTTTGTCTCAAATTACTGTAGCTCTTGTGCCCCGATAGCTTACCTGTACCACAGAGAGTAGGAGCTAGCTTCTG  
CATGGTACTAGTAGATCAGGATCAGTTGAAATCTTAGGCTTTTCATCTACACAAAATACAGGAGTAGATCTGTTTCAGAACTTG  
AGAACAAGAAGCTTCCAAAAGAACAGGCCGTACGAACACCTAATTTACAGCAGGTCTGTTGGTCTCTGATTAGTACTCCTTAG  
TAATCAATCAGGTTACAGAAAGCTAGAGCAGAGCTAATCTTCTACTGTCTGCAATGACAGGGAATGTAACTGAAGATGCAAA  
TACAATTAATCTACTCTGATCTGATGGGGGCTGCCACAAAGTAAAGATTAAAGAATGCCAACATTGCCCCAAAAGCAGGGCTG  
CAAAAGCCATGGCTTGAACACATTCCTCCATGTTCCATGTTCTCATGCCCCCTCTCCATAACCCAGTGCATTCGTTCTG  
CAGGGTGAGGTGTCCAGGCACTAAACAAACAGCATGGTGGCATGTTAAGCAATGCCAAGAAGATCCATTATCTTATTACATG  
CTTTAACCGATCTTTGGGACTAGTGAGAATGATGATATAAAGCCTTTTCTGCCACCTTCTTCTTCTTCCACCTAGCTGCAGCCTC  
TGCCAGTCTGCAGATGCAGTAGTGTGAGCAAAACAACTAGTAGGCAAGCCAGACAGTGCCTCTGACATGGCGCAGCACTA  
GAAGCAGCAGAGGCACCTGCTGCAGCTAGAAGCTGATCGATTTTCAGCTCCCAAAAGTGCTTTCTAGGAAAAGTGGCAGAGG  
ATTCTAAT

>SsLRR-RLK215

GTGACGTATTGCTCCTTATGTACCTTCTCATTTGTTTTATGGATCGGAGAGCATGGCAATTGATCTCTGCATTCTTCAATGGTG  
AAAACCTCAGATTAGTCTTTCCAGTTACTGTTCAAAATCGGTCTATTTAAAGGTATGGATGAATGTATAAATTATTGCTGAATC  
AGGAGGTTATTACTTATGAGGCCCTAGGTAGCTGTCTTATTAGTTTAAATTTTGTTCATTAAAAAGGCCAAGTAAATAAGGGGACC  
TAGCTATGCAAGAATAGTGTAGTTAAATAAGGACCAGTGCATAGTGTTTTTCTACTCTAACTTGATCTTACTTGACAACATTCT  
AGTTTAACTTATTAGCTCTTAAATGTTTTATGTCACCCCTGTCTCTTCTGCCATGTTTTTCTTAAACTTCAAAGATGCCAACAA  
CACAGCAAGGATTTCAAATATGCTCATAGAATTGACATCCTAGGGTGTATATACATAGCCCCAAGAAAAAGCCGCTTGCAGC  
TAAGATTGACATTTTTTTCACATGGTTTTCTGTTGTTCACTGGGTGTGCAATATTTTGATGCAGTTTTTATTCTAGATGCAGTAT  
ATATTTCTGTCCCTTGTATTGCTGTTATTGCTTGATCAGATATTCATTCAGATCATCAGATACGGAAGATGCATATAGCAGC  
CTTGCAAGGCCAATTTAAACAATTTCACTAATCACTTGTGATTCTTTCTGACTGTGTTTCAGCAGCCTTTCAAACCTATGTCAAC  
TCATTGTCTAATTAACCCATTTAATTACATTGCTAGTACTACTTCTGTTCCCTTTTTCATCTGATGCATGTAGGACAGGTGACATT  
CTACTGGGGACATGTGCCAAGCAATGCTCAAAGGATCCCCCTTGTGAGACAAGAGCAGTAACAGCAGCAGCAGCAGCTACTG  
CATGCATGCCCATTTGTACAGGAATGATTAGCGCAGGTTTTATTTTAAACAAGGTCAACTTGGGCAAGCTCAACACATGCAGT  
GCACCACTGTACATATGCTTAGGCAGGGTAAACTTTCTTTAGTTGTTTATATATGCATGACATGTGTCCAGATCTCTTAGCTAGT  
TAGGATGCTTGCATCAGGACAACACCAAGAACATACCCCTCCACCCCTTGTCTCCCTTTGGGTGTAATCTTTTCTTTTAGAG  
CCTGCAATGGAAGCATCTGTTCTACTGACTGGTAACTGACATAGGATTAGTACTGTTTGTGTTTGTCTCAAACTACTGTGGCAT  
GGTACTAGTAGATCAGGATCAATTGAAATCTTAGGCTTTTCATCTACACAAAATGCAGGAGTAGATCTGTTTCAGAACTTGATA  
ACAGAAGCTTCCAAAAGAACAGGCCGTACGAACACCTAATTTACAGCAGGTCTGTTGGTCTCTGATTAGTACTCCTTAGTAA  
TCAATCAGGTTTCAGAAAGCTAGAGCAGAGCTAATCTTCTACTGTCTGCAATGACAGGGAATGTAAACTGAAGATGCAAAATGC  
AATTAATCTACTCTGATCTGATGGGGGCTGCCACAAAGTAAAGATTAAAGAATGCCAACATTGCCAAAAGCAGGCTGCAA  
AAGCCATGGCTTTAAACACATTCCTCCATGTTCCATGTTCTCATGCCCCCTCTCCAAAACCCAGCTCACATTCGTTTCGCAG  
GGTGAGGTGTCCAGGCACTAAACAAACAGCATGGTGGCATGTTAAGCAATGCCAAGAAGATCCATTATCTTATTACATGCTTT  
AACCGATCTTTGGGACTGTGAGAATGATGATATAAAGCCTTTCTGCCACCTTCTTCTTCTTCCACCTAGCTGCAGCCTCTGC  
CAGTCTCTGCAGATGCAGTAGTGTGAGCAAAACAACTAGTAGGCAAGCCAGACAGTGCCTCTGACATGGCGCAGCACTAGAA  
GCAGCAGAGGCACCTGCTGCAGCTAGAAGCTGATCGATTTTCAGCTCCCAAAAGTGCTTTCTAGGAAAAGTGGCAGAGGATTCT  
TAAT

>SsLRR-RLK240

CCTAGTCGAAATTTTTCATGTGCAATATGATAAAATCCAAAGAAAAAGTTTGGAAAACATAGCTATAAATTAACCAAATTACG  
ATAATACATTTTCTAGATGGAATTTTCAACTATGCCAATCTCCATGATAAATTTTCACTTTCTTTACCAACAAATAACAATA  
GAAGCAATATACTGATCATTTGTCTACGCTATATCCAATCCAAGGTACTTATGAAATAACAGCAAAATTCATTCTCCAATTGTC  
CAAAACCTAATAGTGGGATGAATGGGATCTGGGAATTGGGAACAGAAACACTGACCAAGTTCAATCAATAGGACATTGCCAAC  
GGGGGCAAGGCCACAGGGGTTAGCCGGCCAGGGCCAGCCGTGGGGCACCGCCACAGCGCGCTGGACGGCTGCTGCCG  
GCCTAGCGGGCGGTGGCTTGACGCGCTCGGACGCCAGCGGCAAGGCATGGGGAGCGACAGGGTGGGCGGGGCGGGCGGGCG  
CGCGCAGCGGCGAGCGGTCAAAGTGGGGCGGGCGGGCTGCGGGTGGGCAGGGGCGGGTGGCGGGGTAGGGCGGGGCGGG  
GGCCGCGCCGACGGCGAGTGGCCGACTGGGGGCGGGCGGGGCGGAGTGGAGTGCAGGGGACGAGGGTGGCGTATTGCGG  
CGCGGACTCGCGCGCTCGGGGTTGCCCTCCGCTGGGCTGAGACTGAGACGAGAGTGAAGAGGAGGGTGGTTGGGCC  
AAATTTTCATGGGCTCTGCAGACTAGTAAAAATACTTTGGGCCAAATTTCAAGGTAGTCCCGGGCTACCTGGACTACCCG  
TGGGCCCGCACTGCTGATGTAGGACAGGTGACATTTCTACTGGGACATGTGCCAAGCAATGCTCAAAGGATCCCCCTGTGTCAG  
ACAAGAGCAGTAACAGCAGCAGCAGCAGCTACTGCATGCATGCCCATTTGTCACAGGAATGATTAGCGCAGGTTTTATTTTAA  
CAAGGTCAACTTGGGCAGACTCAACACATGCAGTGCACCACTGTACATATGCTTAGGCAGGGTAAACTTTCTTTAGTTGTTT  
ATATATGCATGACATGTGTCCAGATCTCTTAGCTAGTTAGGATGCTTGCATCAGGACAACACCAAGAACATACCCCTCCACCC  
TCTTGTCTCCCTTTGGGTAAATCTTTTCTTTTAGAGCCTGCAATGGAAGCATCCTGTTCTACTGACTGGTAACTGACATAGG  
ATTAGTACTGTTTGTGTTTGTCTCAAATTACTGTGGCATGGTACTAGTAGATCAGGATCAATTGAAATCTTAGGCTTTCATCTACA  
CAAAATGCAGGAGTAGATCTGTTTCAGAACTTGATAACAGAAGCTTCCAAAAGAACAGGCCGTACGAACACCTAATTTACA  
GCAGGTCTGTTGGTCTCTGATTAGTACTCCTTAGTAATCAATCAGGTTTCAGAAAGCTAGAGCAGAGCTAATCTTCTACTGTCT  
GCAATGACAGGGAATGTAACTGAAGATGCAATGCAATTAATCTACTCTGATCTGATGGGGGCTGCCACAAAGTAAAGAT  
TAAAGAATGCCAACATTGCCAAAAGCAGGGCTGCAAAAGCCATGGCTTTAAACACATTCCTCCATGTTTCCATGTTTCTCAT  
GCCCTCTCCAAAACCCAGCTCACATTCGTTTCGAGGGGTGAGGTGTCCAGGCACTAAACAAACAGCATGGTGGCATGTTA  
AGCAATGCCAAGAAGATCCATTATCTTATTACATGCTTTAACCGATCTTGGGACTAGTGAGAATGATGATATAAAGCCTTTTCT  
GCCACCTTCTTCTTCTTCCACCTAGCTGCAGCCTCTGCCAGTCTCTGAGATGCAGTAGTGTGAGCAAAACAACTAGTAGGCA  
AGCCAGACAGTGCCTCTGACATGGCGCAGCACTAGAAGCAGCAGAGGCACCTGCTGCAGCTAGAAGCTGATCGATTTTCAGC  
TCCAAAAGTGCTTTCTAGGAAAAGTGGCAGAGGATTCTA

>SsLRR-RLK50

TTCAATGTACTCTATCGTTTCTGAACCCGGCCTCGGGCTGGTCCCTTGTAATGACTTCTATTTCTCCCTTAATACAATGATACG  
CAACGCTCTTGGGTATTGTATGTTTTTTTTCACATACATAGTAACACAGTATATGCAAAACGTACAAGAACTATAGCTTATTG  
TAAAAATGTCAAAGTTTCAGGACAATGCCTTAAAGGTAAAGATTCCCTAAAATTGACAATCTAGCACACCAATGTGCTTTATAG  
GAAACTAAAGCCTGACGTCTCATCAAGAATCTAATCAATAAGAGATAATCGGACTTCCATGTGTTGGAAATATTGCGCCTG  
GGCAAGTTGTGCATATGCTTCTGTACCATTATCAAGAAAATGTTCATGACTAACTAACAACAAATTTCCAATATGCCTGTTCC

TCCAGCTTCCACCAATGTAGTAATCGTTTGCAGATAAGTGCAATTTACTTTTGGAAAATTTAAGAGCTCGGGTACAACGATT  
ACGACAAATGCAGACTAGTTTAATGTTTTTTTGTGGAAGCTGCATAAACATTACTTTCAGTGTGTGGTAATAGTAGATTAC  
TAGGAATTTTTGTAGAGAACTGCATGTAGTGCATTATGATTTCACTTGTATGATTCTACAATGTACCAATCAACCTCATGGA  
CTGTAGATATGTACAGTGCATCACTGATTAAGGGCCAATGATTTATAGATTAAGCGTGATTTGTTCTTGCCGGCAGGCAAGC  
CTAACCAAAAAAGAAGGATAGAAGATTCTCTGCTCACTTTTCACTCTTTGTAAGCTTGTAGCAGAAATTTAAAAACACGAGC  
TACTGATGACACCTGGAACAGAATCTTACAGTGCCAAATAGATTTC AACCTGCAAGGATCACTGACACAGGTTCCATTGTAC  
ACTGCAAGATGAGATTAAAGTACTACTTTTAGAATCAGTCATTTGTGTTAAACACCCACAGCACGCTTGTCTGCTGCTCCTATGTA  
GCTTTGCTTCCCTTTCAGTAGTACATTATACTAACCCAGAGGCCAATAAAGTAATCTTGGCATTAAACCATGCCTGTCCAGTTT  
TGGACTTCCATTGTTTACAGACAAGCAGTGTGGGTGAGAATTTCTTCTTAGTTAAGCATGATTTATTTGTTTCTCTGAAGTGATG  
ACTGGGTTTTTCAGAGGTCTTGATTTCTTCCGAAATGGTGATAAAAAATGCAGTTTGTACCAATATTCAGTGCTTTCCAACTC  
AGGGACACAGTACAACACTACTTCATTGCATGCCAGTAATTTACTTGAAATAATTATCTAATTAACAGAACTAATCATGGTGTGT  
GCTTCAGAGATCTTCAGTACAAGAAAGGTAACCTCAAGCTTAATCAACCTTCATAGCACCAATATTCATCATAACTGAAAAA  
TGACTATTCTGTGCCCTGCCTACATGAACACAATACGGAATAAACTCCAGTGGAACCCCCATGTTCTAAGTTTATACAATG  
TACGAGTTCCGTTTGTGTTAAACCAACAAGACAAATCTCTCTTCCAATGACGAGTGACCAATCCGCTTTACACATTCCCT  
TCACCACATGGGCCATGTCTCCCAAGCTCTCAATAATTCCAAAGGCATTTCCAGCCTATGTCCATGCCTCCTCCCAACCTTT  
ACACTCTCATACCGAGCTGTTCTTGTGTACCCAAGGCCCCACAGAGGCTACTGAACCATGTACCTAACACTACTACAACGC  
AGCAGTATACCAATGAGTATCATGCCACCAGCAAGTATTTTATCTCCAATCCATCTCCAGACACATAAAATTATTCGATT  
TCTGATCTAATCATAGACATGACCTCCCTATATACTTTCTGCGAGTTTCCCTCCATTTCTCTATTGCTTCAAACAAAGGCAAT  
GAAAAACAACCTCTGCCAGTGAAGGAGAGGCAGAAGGCGGCAGAGGAGTGAAGGAGAAGGGAAGAACAGAAGAAACCG  
AGCA

>SsLRR-RLK20

AATGTACTCTATCGTTTCTGAACCCGGCCTCGGGCTGGTCCCTTGTAATGACTTCTATTTCTCCTTAATACAATGATACGCA  
CGCTCTTGCGTATTCGATAGTTTTTTTTTTCACATACTATAGAACCAGTATATGCAAAACGTACAAGAACTATAGCTTATTTGTAA  
AAAATGTCAAAGTTTCAGGACAATGCCTTAAAGGTAAAGATTCCCTAAAATTGACAATCTAGCACACCAATGTGCTTTATAGG  
AAACTAAAGCCTGACGTCTCATCAAGAATCTAATCAATAAGAGATAATCGGACTTCCATGTGTGGAAATTTATTTGGCCTGG  
GCAAGTTGTGCATATGCTTCTGTACCATATCAAGAAAATGTTCAATGACTAACTAACAAACAAATTTCCAATATGCCTGTTCTCT  
CCGAGCTTCCACCAATGTAGTAATCGTTTGCAGATAAGTGCAATTTACTTTTGGAAAATTTAAGAGCTCGGGTACAACGATTA  
CGACAAATCGACAGCTAGTTTAATGTTTTTGTGGAAGCTGCATAAAACATTACTTTCACTGTGTGGTAATAGTAGATTACT  
AGGAATTTTGTGCAGAGAACTGCATGTAGTGCATTATGATTCACTTGTATGATTCTACAATGTACCATTACAACCTCACTTGAC  
TGTTAGATATGTACAGTGCATCACTGATTAAGGGCCAATGATTTATAGATTAAGCGTGATTTGTTCTTGCCGGCAGGCAAGGC  
TAACCAAAAAAGAAGGATAGAAGATTCTCTGCTCACTTTTCACTCTTTGTAAGCTTGTAGCAGAAATTTAAAAACACAGAGT  
ACTGATGACACCTGGAACAGAATCTTACAGTGCCAATAGATTTC AACCTGCAAGGATCACTGACACAGGTTCCATTGTACA  
CTGCAAGATGAGATTAAGTACTACTTTTAGAATCAGTCATTTGTGTTAAACACCCACAGCACGCTTGTCTGCTCCTATGTAG  
CTTTGCTTCCCTTCAGTAGTACATTATACTAACCCAGAGGCCAATAAAGTAATCTTGGCATTAAACCATGCCTGTCCAGTTTAGT  
GGACTTCCATTGTTTCAGACAAGCAGTGTGGGTGAGAATTTCTTCTTAGTTACAGCATGATTTATTTGTTTCTCTGAAGTGATG  
ACTGGGTTTTTCAGAGGTCTTGATTTCTTCCGAAATGGTGATAAAAAATGCAGTTTGTACCAATATTCAGTGCTTTCCAACTC  
AGGGACACAGTACAACACTACTTCATTGCATGCCAGTAATTTACTTGAATAATTATCTAATTAACAGAACTAATCATGGTGTGT  
GCTTCAGAGATCTTCAAGACAAGAAAGGTAACCTCAAGCTTAATCAACCCCTTCATAGCACCAATATTCATCACTAGCAAAA  
ATGACTATTCTGTGCCCTGCCTACATGAACACAATACGGAATAAACTCCAGTGGAACCCCCATGTTCTAAGTTTATACAAT  
GATTCAGTTCCTGTTTGTGTTAAACCAACAAGACAAATCTCTCTCTCCAATGACGAGTGACCAATCCGCTTTACACATTCCC  
TTCACCACATGGGCCATGTCTCCCAAGCTCTCAATAATTCCAAAGGCATTTCCAGCCTATGTCCATGCCTCCTCCCAACCTT  
TCACTCTCATACCGAGCTGTTCTTGTGTACCCAAGGCCCCACAGAGGCTACTGAACCATGTACCTTAACACTACGCAACG  
CAGCAGTATACCAATGCAGTATCATGCCACCAGCAAGTATTTTATCATCCAATCCATCTCCAGACACATAAAATTATTCGATTA  
ATCTGATCCTAATCATAGACATGACCTCCCTATATACTTTCTGCGAGTTTCCCTCCATTTCTCTATTGCTTCAAACAAAGGCA  
ATGAAAAACAACCTCTGCCAGTGAAGGAGAGGCAGAAGGCGGCAGAGGAGTGAAGGAGAAGGGAAGAACAGAAGAAAC  
CGAGCA

>SsLRR-RLK2

CAATGTACTCTATCGTTTCTGAACCCAGCCTTGGGCTGGTCCCTTGTAATGACTTCTATTTCTCCTTAATGCAATGATACACA  
ACACTTTTGCATAATCGGTATTTTTTTCACATACTATAGAACCAGTATATGCAAAACGTACAAGAACTATAGCTTATTTGTAA  
AAAGTGTCAAAGTTTCAGGACAATGCCTTAAAGGTAAAGATTCCCTAAAATTGACAATCTAGCACACCAATGTGCTTTATAGG  
AAACTAAAGCCTGACGTCTCAGCAAGAATCTAATCAATAAGAGAGAATCGGACTTCCATGTGTGGAATTTATTTGGCCTA  
GGCAAGTTGTGCTGCTTCTGTACCATATCAAGAAAATGTTCAATGACTAACTAACAAACAAATTTCCAATATGCCTGTTCC  
TCCCAGCTTCCACCAACGTAGTAATCGTTTGCAGATAAGTGCAATTTTACTTTTGGAAAATTTAAGAGCTCGGGTACAACGATT  
ACGACAAATGCAGACTAGTTTAATGTTTTTTTGTGGAAGCTGCATAAACATTACTTTCAGTGTGTGGTAATAGTAGATTAC  
TAGGAATTTTTGTAGAGAACTGCATGTAGTGCATTATGATTTCACTTGTATGATTCTACAATGTACCATTACAACCTCACTTGA  
CTGTAGATATGTACAGAGTATCATCTTATTAAGGGCCAATGATTTAGAGATTAAGCGTGATTTGTTCTTGCCGGCAGGCAAGC  
CTAACCAAAAAAGAAGGATAGAAGATTCTCTGCTCACTTTTCACTCTTTGTAAGCTTGTAGCAGAAATTTAAAAACACGAGC  
TACTGATGACACCTGGAACAGAATCTTACAGTGCCAAATAGATTTC AACCTGCAAGGATCACTGACACACAGGTTCCATTGT  
ACACTGCAAGATGAGATTAAGTACTACTTTTAGAATCAGTCATTTGTGTTAAACACCCACAGCACGCTTGTCTGCTGCTCCTATG  
TAGCTTTGCTTCTTTCAGTAGTACATTATACTAACCCAGAGGCCAATAAAGTAATCTTGGCATTAAACCATGCCTGTCCAGTTT  
AGTGGACTTCCATTGTTTACAGACAAGCAGTGTGGGTGAGAATTTCTTCTTAGTTAAAGCATGATTTATTTGTTTCTCTGAAGTG  
ATGACTGGGTTTTTCAGAGGTCTTGATTTCTTCCGAAATGGTGATAAAAAATGCAGTTTGTACCAATATTCAGTGCTTTCCAAA  
CTCAGGGACACAGTACAACACTACTTCATTGCATGCCAGTAATTTACTTGAAATAATTATCTAATTAACAGAACTAATCATGGTG  
TGTGCTTCAGAGATCTTCAGTACAAGAAAGGTAACCTCAAGCTTAATCAACCTTCATAGCACCAATATTCATCATAACTGAA  
AAATGACTATTCCTGTGACCTGCCTACATGAACACAATACGGAATAAACTCCAGTGGAACCCCCATGTTCTAAGTTTATACA  
ATGATTGCAGTTCCTGTTGTTTAAACCAACAAGACAAATCTCTCTCTCCAATGACGAGTGACCAATCCGCTTTCACACATTC  
CTTCACCACATGGGCCATGTCTCCCAAGCTCTCAATAATTCCAAAGGCATTTCCAGCCTATGTCCATGCCTCCTCCCAACC  
TTTACACTCTCATACCGAGCTGTTCTTGTGTACCCAAGGCCCCACAGAGGCTACTGAACCATGTACCTAACACTACTACAAC  
CGAGCAGTATACCAATGCAGTATCATGCCACCAGCAAGTATTTTATCATCCAATCCATCTCCAGACACATAAAATTATTCGAT  
TAATCTGATCCTAATCATAGACATGACCTCCCTATATACTTTCTGCGAGTTTCCCTCCATTTCTCTATTGCTTCAAACAAAGGC  
AATGAAAAACAACCTCTGCCAGTGAAGGAGAGGCAGAAGGCGGCAGAGGAGTGAAGGAGAAGGGAAGAACAGAAGAAAC  
CCGAGC

>SsLRR-RLK35

CAATGTACTCTATCGTTTCTGAACCCAGCCTTGGGCTGGTCCCTTGTAATGACTTCTATTTCTCCTTAATGCAATGATACACA  
ACGCTCTTGCAATAATCGGTATTTTTTTCACATACTATAGAACCAGTATATGCAAAACGTACAAGAACTATAGCTTATTTGTAA  
AAAGTGTCAAAGTTTCAGGACAATGCCTTAAAGGTAAAGATTCCCTAAAATTGACAATCTAGCACACCAATGTGCTTTATAGG  
AAACTAAAGCCTGACGTCTCAGCAAGAATCTAATCAATAAGAGAGAATCGGACTTCCATGTGTGGAATTTATTTGGCCTA  
GGCAAGTTGTGCATATGCTTCTGTACCATATCAAGAAAATGTTCAATGACTAACTAACAAACAAATTTCCAATATGCCTGTTCC  
TCCAGCTTCCACCAACGTAGTAATCGTTTGCAGATAAGTGCAATTTACTTTTGGAAAATTTAAGAGCTCGGGTACAACGATT  
ACGACAAATGCAGACTAGTTTAATGTTTTTTTGTGGAAGCTGCATAAACATTACTTTCAGTGTGTGGTAATAGTAGATTAC

TAGGAATTTTGTCTAGAGAACTGCATGTAGTGCATTATGATTCACCTTGTATGATTCTACAATGTACCATTACAACCTCACTTGA  
CTGTTAGATATGTACAGTGTCTACTTATTAAGGGCCAATGATTTAGAGATTAAGCGTGATTTGTTCTTGCCGGCAGGCAAGC  
CTAACCAAAAAAGGAAGATAGAAAGATTCCTGCTCACTTTTCTACTCTTTGTAAGCTTGTAGCAGAAATTTAAAAACACGAGC  
TACTGATGACACCTGGAACAGAATCTTACAGTGCCAAATAGATTTCCAACCTGCAAGGATCACTGACACACAGGTTCCATTGT  
ACACTGCAAGATGAGATTAAGTACTACTTTTAGAATCAGTCATTTGTTAAACACCCACAGCACGCTTGCTGCTGCTCCTATG  
TAGCTTTGCTTCTCTTTCAGTAGTACATTATACTAACCCAGAGGCCAATAAAGTAATCTTGGCATTAAACCATGCCTGTCCAGTTT  
AGTGGACTTCCATTGTTTCAGACAAGCAGTGTGGGTGAGAATTTCTCTTAGTTAAAGCATGATTATTTGTTTCTCTGAAGTG  
ATGACTGGGTTTTCAGAGGTCTTGATTTCTCCGAAATGGTGATAAAAAATGCAGTTTGTACCATAATTCAAGTGTCTTCCAAA  
CTCAGGGACACAGTACAACCTACTTCATTGCATGCCAGTAATTTACTTGAAATAATTATCTAATTAACAGAACTAATCATGGTG  
TGTGCTTCAGAGATCTTCAGTACAAGAAAGGTAACCTCAAGCTTAATCAACCCCTCATAGCACCAATATTCATATAACTGAA  
AAATGACTATTCTGTGACCTGCCTACATGAACACAATACGGAATAAACTCCAGTGGAACCCCCATGTTCTAAGTTTATACA  
ATGATTGCAGTTCCGTTTGTTTAACCACAACAGACAAATCTCTCTCTCCAATGACGAGTGACCAATCCGCCTTTCACACATTC  
CCTTCACCACATGGGCCATGTCTCCCCAAGCTCTCAATAATTCAAAAGGCATTTCCAGCCTATGTCCATGCCTCCTCCCAACC  
TTTACACTCTCATAACCGAGCTGTTCTGTGCTACCCAAGGCCACAGAGGCTACTGAACCATGTACCTAAACACTACTACAAC  
GCAGCAGTATACCAATGCAGTATCATGCCACCAGCAAGTATTTTTATCATCCAATCCATCTCCAGACACATAAATTATTGAT  
TAATCTGATCCTAATCATAGACATGACCTCCCTATATACTTTCTGCGAGTTTCCCTCCATTTCTCTATTGCTTCAACAAAGGC  
AATGAAAACACAACTCTGCCAGTGAAGGAGAGGCAGAAGGCGGCAGAGGAGTGAAGGAGGAGGGAAGAACAGAGAAA  
CCGAGC

>SsLRR-RLK198

GGAGAAGCAAGAGGAAGAGGAGCAGCAGCAAGAAGAGGAGGAGTCAAGCAGAGGAGGAGGAGGGGGGAGGACCCTTAG  
ATCCAGATTTCATGGAGGAAGAGAGAGGAGAGGGGAGGAAGAGAAGAGGTACCTGAGCCTGATCCGGCCGCATCCACGGCC  
GCCACCGCCGGATCCGCTGGATCTACAGTCGCCATCGCCGGATCCGGCCGGATCCACGCGCGCTGCCACCGCATCCGCCATGG  
CGGAGGCCCGGGCGGGCAAGCATGAGAAACGTTGCGAGAGAGCGAGAGCGAGAGTGAGGGAGCAGGAAGGTGCACGG  
GGAAGGCGGAGGATGCGGGCGCGCGGCGCAGCGGAGGAAGAGGGGAGGAGTGCGCGGAGGATGCTGACCGGAGCGA  
AGACAGGATGAGAGGGCGAGACGGGGCGGGCGGGGTGAATGCGAGTGAGGAGTGAGAGTGCCGTGCGAGTGAGTGCGG  
GTCGTCCGACGCGTCCAGACGACCGGGGTATATCTTTACCGAAAAGAGGATCGAAGAAGAAGAAATATCAGAATCCCCCTACCC  
TTTTCTTAGTTACTGTTCTTCTTCCCTTCTAAGTCTATTTTCTATATACTAGTTCTTCTTCCATCCCTGCTTCGATCTCCCATCC  
TGAGATCTTGATCTGTTTGTGATTGGAGTTATCTGTTAGTGAATTTCTGTTGGGTGCTAATCATTGCAATCTACTAGCTTA  
CTCTGATGAAAGTAGCAAGATGTAGGGAAGAAAATTAGAAAATGGATCCAGTACGCTGCCGTACGACCCTGCTTGCTACTC  
AGGCAATCGGTGCGGTGCACGTCCTTGTGTTCCACGCGCCTCACGACGGGACGCGCCATAGCCCTCTCCTCTTGATCAGT  
GCCGTCCCTCGTCAGTGAGGCGTGAGCGTTCCGCGCGCGCGTGTGTACCTGTACATGGAGGCGTGCAAGGACGCGGTGGA  
CCTCCTGAGTCTGACCGGCTGCTCCCTGCTCGTGCCCGGGGCCACGGGCTCACGGCCAGACTGTGTACGGCGAACCC  
ACTCCTCAGTCTGCTGCGGCGCTGCCCTCCGCGCTGCTCCGCGCGCAAGCCCAACACTACTTCCGCTGGGCGCGCGG  
AACGTGACCGACGTGTTGGGCTGCGGTATCTCGGTAAGTGAAGTGCCTTGCCAGAGTTCGCTGAACAACCACTCCT  
CAGAGCGAGTATAATAAGAGCATGCTCAGTGATAGTCAAGTTGTTGGTTACAAGTAAGTTATAAGATTGAGTTATACGATA  
AGTATCTTCTATTTATTTAAAAATTCTCTCTTTTCTATTTCTTCTACAACACTTACTACTTAGGCCACTAATACATATGCTTC  
CGTACCTAGCTTGATGCTTGCAATGGGAGCCAAGTCTCATCTCTCTATCTCTCTCTCTCCTCCACATCAGCATATAGCTCGGCTA  
TAAATCTAATTTATGCTCTCTAATAGGCTGTACTGGCTAAACACTGAGATGAAGGAGATAGGAGAGGAGGAGGAGGAGG  
GAGAAATGAGCTATAAGCTTACAGTCGGCTTATGCATAAAAAACCGAGAAATTTTGTAAAGAGTGACAAGTGAGCCATGTATTA  
ATAGTGAAGACGTAACCTACTATATAGATGAGTTAAGAGAAATTTGCAAAAAACCTTGACGCGAGCAACCTAATTATTAACTT  
GCCCTGCTCCGTTCCGACTGGCCTTCTTGATCTCCCCATGAATGACACGTTGGACCTCAGCAACAACATTTGCTCTCAGGGGAG  
TTCCCAACGGTGATTCCCGGATCCAGCGGGGGGCTGGGGGGCTGCAGCCCCCCCCCGGAGGGGTGATTT  
TTCCACTGGAATACTGTAGCATAGCATCAAATCACCATTAAATCTTAATTATAAATCAACATCTTCTTAAATTAGCCCCCTGAG  
GTGTCAATCTGGATCCGCCACTGTTCCAGCGCTAG

>SsLRR-RLK252

TTATCTCATCATATAAATTTAGTCAAACCTTAAGATCCTTTGACTATACAAGATTCTTAGAATAACTTATAATTTGAAATAGAGGG  
AATACATTGTTACGGCATGCATCACAGTCACCCAAAGTTTAACCTTTTTTTTTTTCGAAAGACCCAAAGTTTAACATTGACTA  
AGAGCAGTGACGTTCCGGTAAAAAGACACTGAATGGAACCACTACGAGTCTATGGATCGATAGCGAAACCGCTCTCTTTT  
GTGAAGGAACCTACTCCAGTAATCCAAAAGTTGTGTTCCCGGTTGAGCCGGAAGACAAACAATATGGAAGTGAGTGAGGAG  
TTTAATAAGACGACCCTCAGACCACAAGACTTTCAAATGTAAGAGTGCTGCTACACGTTTCATAACATTTTGAGATCT  
ACAAACTTCATTAGAAAGTTTTTCCGTCGGAGATCTTTTGAAAAATTCGAATTTTAAAAATTTGAATTTCAAACGTAAGTTTG  
CATAACAAGATGAATCAAATTAAGAGTGGTCAACTCAATGTTTCATAACCTTTCAAGATCTCAAACCTCATTAGGAAG  
TTTTTCTATCCGAGATTGTAGTGCTAACATTGTTCAAAATCTTATATATCTCTCTGTAGTTTCATGAAACTACATGAGAGACA  
TATAGATTTGTGAATAACGTAATTATCACTTTGTGCAATGAAGAAATGACCAATATAAAGTTTGATAGATCTTGAGAAGTTATG  
AACTTTGTAGTTGAAAACTTTTTTATTTGAATTCGTTTAGGGCACCAAAATGCAGTTTGAAAAATTTACTTTGCCGAGTGAAA  
AAAAAACCACTCGGCAAAATGCCCTTCTTGTGAGTGCCGAGTGTTTACTTTGGCACTCGGCAAGAAAGTCTTTGCCGAGT  
GCAGAGACTTTGCTGAGTGCCGAGTGCCCCGAAAAAAAACACTCGACAAAGCCTCCGGCACTCGGCAAGAAACGGATTTC  
CGGTAGTGCCCTCATTTCTAAATTATAAGTCAATTTCCAAGAATCTTGATAGAGTCAAAGTATCTCAAGTTTGACTAATAGAAAGA  
ATTAACATAATAATGACTTAAATAGGTATACTATGAAATATAATTAATAAAGAATCTAATGATACTTAGTTAGTATCATAAAT  
ATTATTATCTCATCATATAAATTTGGTCAAATTTAAGATCCTTTGACTCTACAAGATTCTTAGGCCAGTCTCAATGGAGAGTTTC  
ATTACGTTGTTTCCAAGACTGCCATATCATTGAAATGAAATGAAACTTGGATGAAACACCTACTCTCGATGGAGAGTTTCAT  
TCCGTGGTTTCATAGGCATTAATTTCCAAGACTCATAAAGAGTTGGTAATCGTGCCAAGAGAGTTTCATCTAGATGAAACCCA  
TTTCTTCTCTCTTCTTAAATACACTGCCATGTCATCAAAAGTGCCTATGTGGCAACCCATTTAATGCAAAATGAAACTACGCT  
GAAACTCCCCTGAGACTGGCCTTAGAATAACTTATAATTTGAAATAGAGGGAATACATTGTTACGGCATGCATCACAGTCAC  
CCAAAGTTTAACCTTTTTTTTTTTCGAAAGACCCAAAGTTTAACATTGACTAAGAGCAGTGACGTTCCGGTAAAAAGACAC  
TGAATGGAACCACTACGACTCTATGGATCGATAGCGAAAACGCGTCTCTTTGTGGAAGGAACCTACTCCAGTAATCCAAAA  
GTTGTGTTCCCGGTAGACCGGAAGACAAACAATATGGAAGTGAGTGAGGAGTTAATAAGACGACCACTCAGACCACAAG  
ACTTGTGTTGGTGCAACGAATTTATACAAAGCTAAGTTAAGCTATAAAAGATTGATGCACCTCATCGTTGACGACTCATCGTTG  
ACGAGGAGTAATTATGTAGAGTACATGATTGATGCACCTCGAATCTCAAACTCTCAACCAGCCCTCAGTAGTTCCCTAACCTCA  
TGCACGCAAT

>SsLRR-RLK394

AGAATAGGAACGCATATATACAAAATAAATCTGTGACTGTGAGGTTGGCTAGATGGATCGTGGATGCATCAGCACATGTGCCG  
CACCACAGCAAGAGACGAGACGTTACTTTGGGGCTGTTTAGTTGGCAAAATTTTGGCGAAATGCTACTGTAACAGTTTCGT  
TGTTATTTGGCAAATATTGTCGAATCGTCTAATTAGGCTTAAAGATTGTCTCGTCTATTTCCGTCTAACTAGTGTAATTAG  
TTTTATTTTTATCTATATTTAATGCTTCATGCATGCGTTTAAAGATTCGATGTGACGAGAAATCTGAAAATTTTGGCAAAATTC  
TTGGCAACTAAACCGTACCTTTGACTCGTACCAGTGTTTATGATACGGTACCGTGACAGTGGTAGTGTACTAGTAGTGATACTC  
CAGTACCAACGATTAACCGAGCAGTAACCGCACCAGTACATGATGCATGCATGCATGCATGCATGCATGCATGCATGCATGCATGC  
GGTCACGTTTGAGTTTGAGGGCGGCTGATGAGTGCCTGAGAGAGGGCCGAGCAGGATAGAGGACTGTGAGGAAGTGGGACC  
AGCAGGGACAGTCAGTGGCACGAGCCATTTTTCCCTTCTGGTCACTCACACGCGACACAAGAGAAAGAAAGCCATGC  
AGAGAAAAGAGATGCAGTAGCGACAACAACAAAGGCCATTGGAATTTCTTCTCATGATCTTCAGATCATGGGCCCTTGT

TTAGATTCCAAAGTTTGCCTCCTAAATTCACATATGCAGAATTCCTATTCCCCGTCACATTAAATGCCGGCACATATATAGAGT  
ACTAAATATAGATAAAATCAAAAATAATTACACAGTTTTGTGTACTTTGCGAGACGAACATTTTAAGTCTAATTAATCAATA  
TTTGGACAATTATTACCAAATAAAAAACAAAATTGCTACAGTGTGACGGGACACTTACTATGCAAACATTTGGCTCCAAAGTTTG  
CCATCTAAACAAGGCCATGATCCTTTCTGGGAAAAAAGAACGGAAATTTGCTGCCAATCTGGGAATTCACATCCTCCTCT  
TGCACAACCACACATGACCTGTTCGGCAGGCTGTTTTTGCAGCTTATAAGCCGGCTGTGGCTGTTTTACTGTGAGAGAAAA  
ATACTGTTCCACGGCTGATAAGCCGTAAGCTCAGCCGAACAGGGTGATGGCGCCTCAACCTGTTCTGCACTAG  
CTTTAAGCCAGTTTTAGGACGATCTTCGAATATTAATTACTGTAGGAGTTTTATAACAAAATCATTAGATCAITTTTTGTTCAG  
AAAAATCATATCGTTTTTCATGGACGAAACATAGAAAAAATATTTCCACGCTCTAGAATGGTTGTATCCTCTCTCTTTAGCAG  
TGAATACTCTCGATGAAAAAATAGTATTTTTCTCCAATAATAAATCATCGTGTCCGTAAGCACATCAGCCAAATTTAGCAA  
AACTAAAGAAGCCGTTAAAGTCACCTCAAAAATGAACAACGGCTGTGCCGTGTGCTGTGCTGCGCTGCGCGGCCAAGGGTTT  
ATGGTGCATGGAACAATGGATGCTACTAGCCCCTAGTCCGGCTAGTCGCCCCGCTCTCTGGCCCTGGAACCACTGCAACAAG  
TCTGCAAGCTTGCAAGAGCAAATTGATGGCGCCCGTCATGTCCCTCCGACGCCGTCCCGTCCCGCCTCTGCTGCGCCTACG  
CCTATCTGACACCCCGCCGTCAGCCTGCCGTGCGCCGAGGCCGAACACCATCCAGCACCACCCTCTCTCTCCGCCCT  
TTCGCTTGCATTTAGACTGCTATCATAGCTGCGCCGCCGCTCCCGCGCCGCGGATTCCATTCCATATGCTCAITTCCTC  
CACCACCACCGCCACCCTACCGTCCCTCTTTTTATTCCATCCACCACCACCGTCCGCTCGCCACCACCACAGCCACC  
ACACCACAACCACA

>SsLRR-RLK416

TTATCTAACCATGAAGTAACTAGCTCAAAAGATTGCTCTCGACATTTACAAATTATATAATTAGTTATTTTTTACTTATATTTAA  
TATTTTATGTATGTGTTTAAAGATTTCGATGTGATAGGTGGAAGAGAAAAATATTTTAGTTTGCATGGCAAGTGAACACACCTGC  
AAGTGTTTATGTACGGTACCGTGGCAGTGGTAGTGTAGTACTCCAGTACGAACGGATCAACGGAGCAGTAACCGCA  
ACAGTACATGATCATATGCATATGCAGCCAGACCTGTGCTGGTGACGTTTGAAGTTTGGAGCCGGCTTGTAGTCTG  
CCGAGAGAGGCCGAGCAGGACAGAGGACTGTCAGGAAGTGGGACCAGCAGGGACCAGTCAACGAGGCACGAGCCATTTTT  
TTCCCTTCTGGTCATCACACGCGACACAAGAGAAAAAGAAAGCCATTAGAGAAAAAGAGATGCAGTAGCGACAACAAAAAG  
GCCAATGGAAATTTCTTTCACAGTAAATCATGCTGCTCAGTAAAGCCCTTAGCTAAATTTAGCAAAAACGAAAGAACGGGT  
TGGGAATTCACATCCTCCTCTTGCAACAACACACATGGCGCCCTCAACCCGTTCTGTCATAGCTTTAAGCCAGTTTATGGA  
CGATCTTCGAATATTAATTACTGTAGGAGTTTTATAACAAAATCATTAGATCAITTTTTGTTCAGAAAAAATCAGATCGTTTTCT  
ATGGACGAAACATAGAAAAAAGATTTCCACGCTCTAAATGGTTGTATCCCTCTTCTTCAGCATTGAATACTTTCTCATGA  
AACAATAGTATTTTTCTTTCACAGTAAATCATGCTGCTCAGTAAAGCCCTTAGCTAAATTTAGCAAAAACGAAAGAACGGGT  
AAAGTCACCTCAAAAATGAAGCCAACGGCTGTGCCGTGTGCTGGGCTGCGCTGCGCGGCCAGGTGCTGCGTTTAGATGTA  
AAAATTTTGTAAATGGCACTGTACCTTTTTTGTGTATTTAATAAATATTGTTCAATCATGGTCAATTAGGCTTAAAGA  
TTGCTCTCGTCCATTTCGTCTAAACTGTGTAATTAGTTTTATTTTTTATCTATATTAAATGATTCATGTATGTGCAAAAGATTCG  
ATGTGACGAGAAATCTGAAAAATTTTACAAAAATTTCTAGGAACTCAACAGGGCCTTATGGTGCATGGAACAATGGATGCTA  
CTAGTCCGGCTAGTCGCCCCGCTCTCTGGCCCTGGAACCACTGCAAAAGATTGCTCTCGACATTTACAAATAAACTGTGCAA  
TTAGTTATTTTTTACCTACATTTAACGCTCTATGCATACATTTAAAGATTTCGATGTAACACTTACTATGCAAAATTTTTACCTC  
TTTTGGCATCTAAACACTGCCTAAATCATGCTGCTCCGTAAGCAATAGCATCAGCCCAATTTAGCAAAAACGAAAGAACGG  
GGTAAAGTCACCTCAAAAATGAAGCCAACGGCTGTGCCGTGTGCTGTGCTGTGCTGCGCTGCGCGGCCAAGGGTTATGGT  
GAGTGGAAACAATGGATGCTACTAGCCCCCTAGTCCGGCTAGTCGCTCGGCTCTCTGGCCCTGGAACCACTGCAACAAGTCTGC  
AAGCTTGCAAGAGCAAATGATGGCGCCGTCATGCCCCCGACCCCGTCCCGTCCCGCTCTGCTGCGCCTACGCTATC  
CTGACACCGCCCGCGCTCAGCCTGCCGTGCGCCGAGGCCGAACACCATCCAGCACCACCCTCTCTCTCCCGCCCTGCTG  
CTTGCCCTTTGACCTGCTATCATCAGCTCGCCCGCCCCGTCCCGCGCCGCGGATTCCATTCCATATGCTCATTCCCTCCACCA  
CCACCACCCTACCGTCCCTCTTTTTATTCCATCCACCACCACCGTCCGCTCGCCACCACCACAGCCACCACACCACA  
ACCAATGCTCTC

>SsLRR-RLK429

GTTTGTCTTGACGTTCTCTGCAGGTGGCTGCCCTTTGGTTGCGGGCCGGTACTCGAGGCTGTTGTTACTCTTCGCTCTTTTGT  
AGTCTCTCTGTTGTTGTTGTTGTTTTCGTTTTCCTTGTTTTTTACCTTTCCGTTCTTGGCGGCTGTGCGGGCAA  
CCTTTGGTTACCCTTTGTGCGACGCTTTCGGTGTGTTGTTGCGTTGTTATCTATTTCTCCTAATGAAACACGTGCTGCAGTGCAC  
GTTGCGGAAAAAAGATGAAATCAAACGTGAAGAAAAGTTCCCTATGTTTCTTTTCTTTTCTTACACACAATTCC  
TGAGAACCAAGGAAGTTACAGAAACTCGAAGCATAGGATGGGGGAGCCTGAATGAACGTTGAAATCAAATCTGTGACTGT  
TTTTTTTTTGGAAAAATAAATCTGTGACTGTGAGGTGGGCTAAATGGATCGTAGATGCATCAGCACATGTGCCGACCCACA  
GAGATGAGACGTTACTTTGGGTGTGTTTAGTTGATCAAAAGTAGGTAaaaaaTACTGTAACATCTTTCGTTTATTTTGACA  
AATATTATCAACCATGAAATAACTAGGTTTAAAGATGCTGCTCGACATTTATAAATATGTAATTAATTATTTTACTTATA  
TTAATACTCTGTGCATCGTTCAAAGATTGATGTGATAGGTGGAAGAGAAATTTTGAAGTTGCAAGTGAACA  
CAGCCTTTGACTCGTAAGAGTGTATTATGTACGGTACCGTGGCAGTGGTAGTGTAGTATGATATCCAGTACGAACGGATCA  
ACGGAGCAGTAACCGCAACAGTACATGTACATGCATGCATACAGATATGCAGCCAGACCTGTGCGTGGTCACTGTTGA  
GTTTGAGGCGGGTGATGAGTTCGCTGAGAGAGGCCGAGCAGGATAGAGGACTGTGAGGAAGTGGGACCAGGAGGACCA  
GTCACGAGGCACGAGCCATTTTTTCCCTTCTGATCACCAACGACACAAAGAGAAAAAGAAAGACGATGCAAGAAAGA  
GATGCAGTAGCGACAACACAAGGCCATTGGAATTTCTTCTCTGATCTTCAGATCATGATCCTTTCTGGGAAAAAACA  
GGAAATTTGCTGCCAATTCTGGGAATTCACATCCTCCTTTTTGCAACAACCACACATGGCGCCCTCAACCTGTTCTGCACTG  
GCTTTAAGCCAGTTTTTGGGACGATCTTCGAATGTAATTACTGTAGGAGTTTTATAAAAAAATCATCAGATCAITTTTTTTCAGA  
AAAAATCAGATCGTTTTTACGGACGAAACATAGAAAAAATATTCCACGCTCTAGAATGGTTGACCTCTCTTCTCAGCAC  
TGAATACTTTCCAATAAAAGAATAATTTTTCTCGCACAATAAATTATCGTGTCCCTAAGCAATAGCATTAGCTAAATTTAG  
CAAAACGAAAGAAGCCGGTAAAGTCACCTCAAAAATGAAGCCAAACGGCTGTGCCGTGTGCTGTGCGCTGCGCGGCCAAGG  
GTTTATGGTGCATGGAACAATGGATGCTACTAGCCCCGAGTCCGGCTAGTCGCTCGCGTCTCTGGCCCTGGAACCACTGCAA  
CAAGTCTGCAAGCTCGCAAGAGCAAATTGATGGCGCCGTCATGTCCCTCCGACGCCGTCCCGTCCCGCCTCTGCTGCGCC  
TACGCCATCTGACACCGCCCGCCGTCAGCCTGCCGTGCGCCGAGGCCGAACACCATCCAGCACCACCCTCTCTCCCTC  
TCCTCCCGCCTGCTGCTTGCCTTTGACCTGCCCGTCCCGCGCCGCGGATTCCATTCCATATGCTCATTCCCTCCACCACA  
CCACCACCCTACCGTCCCTCTTTTTATTCCATCCACCACCACCGTCCGCTCGCCACCACCACAGCCACCACACCACA  
CACCACACCACAACCACA

>SsLRR-RLK417

TACCTGGATCTCGGTTAAGGCATCGGACAGCGCACAGAGCACACGACGAGAATGAATCTTCTGGTGTAGTGCTTGCAAC  
GGCATGCCACCAGGATCTAGAGCAACTATGAAGTCAACAAAAGCAAGCATTTTCAACATGGTTTCTTGGATATATCGTGCAA  
ATAGGAGCAGTTCCAGAATGGAACCTCAGCCTTGGGATCTTCTTCTCCTCCTCATAAATACTAGGTAGTAGGCCACGGAA  
CCACGATCTGGAAGAGCGACACCGCCACGACCGGATGGTCTGTGTATCTCATGAAGAGCCCGGATCCAGCACCCTGCCCC  
ATCAGAAGTGCTCAGTTCTTCCATGCAGACGACTGCTAGCGAGGTGAGAACCCAGGCGACGCCAGCTCCGTTAGGCCA  
CCTCTCCAGGACACATGTGCGCGTTCGCGTTGATGCTGCAATCCACCAACGGCACATCGAGGAATTCATGGGCAAGCAG  
GCTTTTAAACGCGCTCTGCATCCGTTCTTCTCTGTTGATACTATAGTGTGCAAGTGCATGGTGCCTCCATGGGAGGACGAGG  
AGGACAGACGAGAGCGTTAGATGTGTAGGACGCCAGACTGTGTTACTGTATGAAGATGAGCTGCGCCGCTGCTGCTAATA  
TGGTGCAGTAGTAGTAAGTGGATCCCGTCTGCTCGCGCGGCGAGCTCCAGTGGTCCAAGAAGAAGGCCCGTGGCCGCGG  
CGTCCACGCCCCGTGGCCTCCATCTCCATGCGAAGGTAGCTAGCTACCAATCGGCCCTAGCGACTATGTCAGTTGTCTCTG  
GTGTGGGACGCGTCCGCCGGATCGAGCTTGAAGTATTGCGAGAGGCGGGCGCCAGGTGGGGCGGTGGCCAGTGGCCG

ATCGAAGGAGTACAGATCAGCAGGGTTCGATGCTGCCATCTTCATCCATGGCAGCAAAGGATAGCAACGAATAGTGGGTAGC  
AGAGAATAGTGGGCAGCAGATAAGAAAGGGAAGCAGTAGCAGAATTGCCATGCCTATGCTATATATAGCCACAATTGCTGTG  
GGCAGCAAAGGAGGATTCACACTTGCATGCACAAAAAAGCTAGTGGAAAGGATTCACACTTGCATGCACAAAAAATTAGTGGAA  
GGAGTTACACTTGTGATGCAAAAAAAGTTGGAAGGAGTTACACTTGTATTAATAAATACCCTGATCAGGAATTAATAA  
AACTGATCAGTGTATTAAGTACCACTGATCAGGAACTAAAAATAGCACTGATCAGTAATTAATAATAGCACTGTCATA  
TGAAATAAAAGGATTTCACTTACCTTATAGAAATTACTTCCATGGTCACTTTGTTTGCACAACTTGCTACTGCATAATCAAT  
TCTAGAAAATTACAAGACCATCAGTTACCAATTCGAAGCTAATAAATGAAGCAATTGAAGGGTTGACAATGTGCGTCACTTAGG  
AAATAAGCAAGCTCAGGCTCTCCAGTCTCATGTTTCTCTCAGCCAAAGCATCTGCACCTAAGCTGATCAGAGGTGCAAGC  
AACAGCTGTGTGTAAGTATCTAGCAATTTACACTAGTTTGTCTATGAGCTGCTTGATGATTAAGCGCTAGCTGCTTCAATCTT  
TTATCAGCCAAGCTTTGCTGAATTTCACTCATCTTCTCTCTGCTTCCCTATTCTTGGTGCTTGCTTCAATGAACCTCTCAAATT  
TTGCACTAAAATCAACCAAAGCATCAGATAGTTCTTTTGTGCTAATGAGGCCCTTTTTTTTGTCTTCTATGTCCTCAAGGCTG  
CTTTTCTCCATCTAATTTCAAATTCACCAGCTGAGCTGGATAGCCTTTGCATCTTTTCTTTCTTTCTTTTAACTGA  
CAGATATGATCAACCATTCTGCTGACCACGTACTACCTTCCACATATGCAGCAGATGGAAGGCCCTTACCATTATTTTGGCC

GGCCCCACATCTCTAATGCTTTGTTCAGTTAACTGGTCATCACTCATCCCAATTTGCCACACTCTACCGGCATTAACCCAAACTC  
CATGAAAAACAGTTAATGGTTTCTTAGAACGATCCCAACGTATTTTCAGTTGGTTCGGGTACCTCTTACGGCTAGTTTCTGTGT  
TCATGTTGTATTCTTTAGTAACATCTGCCCAATAAGCATCTGACTCTTGTCTATTTCATCTACTGGGTCTTTGAAATTAGCAA  
CCAAGCACTGGCCTACAGAAACAACAAAAAACAAGAAATGAAAAAGACAATCGTTAATCTTCAAGTGTGCATGAAGA  
TAATTGTTTCAACGTACCAATCGTACGTCTTCAGGGACCGTCCAATTCAAACGATGTTGAGTTCAGAAATCCTCATCGACATC  
AATTGTTTCATCTTCTTCTGCATCTAAATCATCCACTATATCATCAGTTTGTCTATGCTGGAGAGGGAGTCTTGTAGCACCCAG  
GTCAATTGGTGGTACTGAAGACTGACTCATTCAGCACCACAAAAGTGAATAATTTTCATTCCTAGGATGGTTAGCAAAAT  
GGGTTTGACTGCAGAAGATTGAGAATCCTCCTTGTGGGTATAACCTGCAACCATATGAATTTCCATGCTAAAAATTAATTATAT  
CTTCACCAAAATAGCACAGCATGCCATACAACACTATTTACTAAAAATCCACAGAATGCCGATAAATTCAGTGGTCAAAAA  
GTAATTGCAGTAGCTTCTCTGTCAAATTAACACAAAGGCATTCTAATTTCAAGACATTAAGTTTCGGATGTCAAAAAAGGAAA  
AAGGAAGAATATCTTGCAGATCTCATTAGACTTAGTAGATAACCAATCTATAATCCACAGATCCACTTCTCTGAAAACTTACCC  
TTCCTAGGA

>SsLRR-RLK96

GCATACGTCAAAAACTCATGTGATGGAGAAAGAGTGAAAAAACTTAGAACTTAGAATTTGGGACTCTACCATCGTCACTCG  
ATCCCCGAGCAATCATCCGTCTGCATTTTTTTTTTGACAACATCCGTCTTCATATTGAAAAGAGATTGAAAACCAATCACAATA  
GACTACCGAGAGACTTGATCAGAAACTTAGAGTGCATTGACACCAAAAAATGTTTCAGATTCTTAATGGAATATTTGTCAA  
ACGGTTTAAAGGAGAATACTTGAATCAATTTTATTTTTGTACTATAACTCTTAAATATAGTTTCTCCTGATTCTAGTTCT  
ACTTTTAAGAATCTAACGAGCTAGCAAAACGGTTCAGAAAGGTGAGTCTAATCATCGGAGAAATGTTTATTAAGGAATTTG  
AATCCAAATTTTTCTTCAAGAATAGAACCGTGCCAAACACACCAAGTATTCCACTATGTCGTTTCATCAGTCGTTAACCCAC  
AAATGATCGAGAGCTGGCACTCTGAATTAACCTAGCGAAGATAGTGCATGTCAACTAGTCTCTCTCCCATACTATTTATGG  
CTTTTCTCGAGAATTAAGAGAGGAGTGAAAAATGTGTGGTGCATAGGAATTAAGTATAGAGATGTTTTGAAAAAAGAGAAA  
ACACAATTAATAAGAGAATGACAAATAATTTGCGACAACGCTACAAGGCTAGAATACTTTTATTACAGAACAGGAAAGTA  
CCTCTGTTTATGTTGAAGAGGCTATTTGGATGCCGGTCCGCACTCGCACAGTACGGTGCAGTGGTGTACTACTTGTGCTAGG  
GAAAAAATAATTTGGTCCCTGGAATGCAAGGAGAATAACAAAGATTTTGTCTATGTTATTCTCATGGCTGCCTTGTCTTAGG  
AGTGTTTAGATGGTGTAAAGTTGGTGTAAAGTTCCTGTAGCACTTTTCTGTTGTATTGTTGGTAAATTTATCCAATCATGGACT  
AACTAGGCTCAAAAGATTGCTCTCGACATTACAGACAAACTGTGCAATTAGTATCTTTTTTACCTATATTAAATGCTCTATG  
CATGTGTCTAAAGATTTCGATGTGACGGAGAATCTTGTAAATTTTTAGAAGTTTGAAGGGATCTAAACACTGCCTAACCAAG  
CAGTGAGACTAGAAATGCGGTGGCCATAACCTAGGATATGCAAAACATAGTACTACCTCCGTAACTATTAGTCTTAAGG  
TTGGGACAACGAAATCAAGAAGGAAACAAGCTGTTTCTTCTTTGACTGAAACATCCAACAAAGTTAATTGAAGGTTGTAA  
TAAAGCCCTATCTAGATGCTTTTTAGGGCCTGTTTGAATAAACTTTTTGTAGAAATCATGCAAGGAGGTTTCATAGAAAAAA  
ACGTGAGAAGTGAAATTTTTTCCACATTCCAAACGGGCTCTTATTCTCTTGAAGCTATTAACAAACTTTTGTTCATTGTTGT  
AACTTGTCTAACAAACAACAGCACTGCTGGAACACAGGTATGGCATCAAGCAACAGCACTGGATCCCGGATCCTGGTTGT  
AACACGTATCAACCCAGAAAGCAACTTTTCATAAACAAATCCAAATCAACTAACAAATACACACTTGTCCCATCAAAAAAG  
TAAAGAAAGCCATACAAAAAACCAACCAATCACCAAACAAGAGACAAGTACTCCTACTCAAAGAACAATTTTTCTCTGT  
TAAAAAAGAAAGAAAGACAAGTTTCTCAAAGATCACTTTATCTTCCCTCCAGAAAACTCCACAGGAATACATGCTTTT  
TTATAGCCGCCCTAGAGGCCTACTGAGTAGGTGTGTGTCAGTGTGTGCAATTTTCATCCAGAACGACCAGCCAGCCG  
AGCCTATCGAAAGCTCTCTCCTTTTCTCGCGGGCCGCGCGGCTCACTCCCTTGTCTCCACTCTCCCGCGGAGACGGAGC  
CTCGATCGAACCCAGTGCCAA

>SsLRR-RLK5

CCCTTTTATAGGGTAAGAGGAGGCCGGGATGCCGGGGCCCTTGAGATGAAGTTTGTGCGATCCCTGTGGATGTGGATGTGGC  
TGTAGCAACGTGCCTCAGGAATGGCTGGCCATCCCCGGACATTGTGGTGACGTGCGGGACGAGACGGTGAAAAGACCCTG  
AGTCTGTGCCATGTGCGCCTTTCTTCCCTGCTGACCGGTGATGGTCTGCGAGGCCGAGTCGAGGCTGGGTGAGGTCCGAT  
GGATAAGGCCGAGTCCCCGAGATCGTGGGGTACGGGCCCTTATCGTATCCTCCCTCGAGGGTGATCAGTGGTAGAACAGTGGC  
CGGTAGGGTGCGTACAGTGACGAGTTATCACTCCCATCCCGGATGGGCAAGTGAATAAGTGAATATGACCCGGTATGTT  
TCCACGTGTGATCAGCTGTAGCCATGACGGTAGGGGTAGTAGGTAGTGCATTAAATGTCCTGACTCTTGACTCGGAGTA  
GGCAGGTAAGATGGGTGCGAGCGATTGACCCGGGGTTCGTACGAGTTCGGAGTTTACCGGTAGTTCGAGATACCTTGTGCGAGCG  
AGCTTCGTACGAATCGTGACGCGGTCAAGGCGTCCCGCGGAGGGTGCCTCGTACGAGTTGGAGTTCGGAGCGCGGTGAGA  
CGCTCCGTGCGACCGCCTCGTGCGAGGCGGAACGTAGTCCGAGGTGCATCGTCTACTGTCTTTGGTTTTGTCTGTGTGGGTG  
CATAGTGCTTTCGTTCTTAAACGCTGATTGTGGGTACCCCTATCTATTGGTACCGACAGTAATGTATATAGTTTATATAAC  
ATTTCTATGATAAGTCTAGTAAGACATGTTTGTTCCTTTAGTATATTACAATATCAGGAATTCAAAATGAAAGAAATAGGC  
AACTTTTTAGAAATCAGGAGTGATGAATAATTTTTATCATCACTGTGCCATTGTGATGCTAGTGAGCTAGTACATATAAGAACT  
AAGAATTAATGTTTTCGCTCATATTTTCGTGGGATGTAATGCTTGTATTTTCTTATATGTGTAATGTGTACATCTGTCTATA  
ATATTATTTTAAACATGTAATATATATATATATATAATAATAGTTCATACATACAAATCTTTAGTCCATTAACTATGTTCAAA  
CACTATAAAAATTGTTAAACTCCAAAAAATATGTGAGTACCTATTATCGTTTATCATTTAAGATAACACCATTGTTACATGCC  
TCAACATATGGTCTCATAATAACCCAAGAATCCTTCACTTTTATCATTTCTGTCTTCCGTGCAAGATACATTTTGAATTTCT  
CTCAATAATTTATATCCCATATGTTGTGAATAATTAATAATTTTTCGTATCTTAATAGATAGATAAAAAAACAACCAATTAATA  
CGAGGGAGTATTTACAAACCTATGTGTAATGGTGCCCTTTACTCTCTTTCGTTTCGTGTAGATCCCTTTAAAAATGCAGAAAT  
TTACATGAATGCTATAGAAATTTTACAGTAATCACCTCATTTTACATAAAAACTCAAGAAAAACAAAAAATCTCACATTTT  
AAAGAGAGCAATATTGGTTGACTCAAGAGTTACAAAAACAGTAAGAAGAATAATTTCAAAAAATCATTTGAATATTTAAATGT  
TGGATCCGGCACATTTTCGCTCCGAGGCTCCTTCTAACAAACGTGTCCGTTCCCGAGCACTGTATCTGATCCGATACATAGG  
CTGCTGATGGCTGATGTTATTTCTGTATAAGTTTTTCTTTTATAAGAGACGGCTGATGTATACCGCAAAACCTTGAGGCCA  
TGCAATAAGGAGCCAAAGGAGCACATGCAATCTAAAAAATTCAGGCTGACATACAAAAACAACGAAAAAGAAAT  
GAACGAAAAACAACGCACTCCCTATAACCCACTCTGGCACTCTGTCCGCTGCCTCGGACACCCACTCCACTCACCCACC  
CATCCA

>SsLRR-RLK37

CCTTTTATAGGGTAAGAGGAGGCCAGGATGCCGGGGCCCTTGAGATGAAGTTTGTGCGATCCCTGTGGATGTGGCTGTAGCA  
ACGTGCCTCAGGAATGGCTGGCCATCCCCGGACATTGTGGTGACGTGCGGGACGAGACGGTGAAAAGACCCTGAGTCTAT  
GCCATGTGCGCCTTTCTTCCCTGCTGACCGGTGATGGTCTGCGAGGCCGAGTCGAGGCTGGGTGCGAGGTTCGATAGATAAG  
GCCGAGTCCCCGAGATCGTGGGGTACGGGCCCTTGTGCTATCTCCCTCGAGGGTGATCAGTGGTAGAACAGTGCAGCGGTAG  
GGTGCCTGACGTGACGAGTTATCACTCCATCCCGGATGGGCAAGTGAATAAGTGAATATGACACCGGATTGTTTCCACG  
TTGATCACAGCTGTAGCCATGACGGTAGGGGGTAGTAGGTAGTCGCATTAAATGTCCTGACTCTTGACTCGGAGTAGGGCGG  
TAAGATGGGTGCGAGCATTCGACCCGGGGTTCGTACGAGTTCGGAGTTTGCCGGTAGTCGAGATACCTTGTGCGAGCGAGCTTC  
GTACGAATCGCGACGCGGTCAAGGCGTCCCGCGAGGGTGCCTCGTACGAGTTGGAGTTCGGAGCGCGGTGCGAGCGCTCC  
GTCGAGCCAGCCTCGTGAGGCGGAACGTAGCGAGGTGCATCGTCTACTGCTTGGTTTTGTTTTGCTGTGGTGTGATTAG  
TGCTTCGTTTCGTTCTAAACACTGATTGTGGGTACCCCTATACTATTGGTACCGACAGTAATGTTATATAGTTTGATAACATTCT  
ATGATAAGTCTAGTAAGACATGTTTGTTCCTTTAGTATATTACAATATCAGGAATTCAAAATGAAAGAAATAGGCAACTTT  
TTTTTTGAGGGAGAAATAGGCAACTTTTTAGAAATACAGGAGTGAAGTGAATGTTTTCATCACTGTGCTGCTGATGCTAG  
TGAGCTAGTACATAAGAACTAAGAACTATTGTTTGTCTTCGCTCATATTTTCGTGGGATGTAATGCTTGAATTTTCTTATATG  
TGTAATATGTACACTTGCTATAATATTATTTAAACATGTAATATATATAAATAGTTCATACATACAAATCTTTAGTCCATT  
ACTATGTTCAAACTATATAAAATTTGTTAAACTCCAAAAAATATGTGAGTACCTATTATCGTTTATCATTTAAGATAACACCAT





>SsLRR-RLK196

>SsLRR-RLK342

>SsLRR-RLK312

TGTCATTTTACCGTTGGGATTTAGGGAACTGTGCTGGGTTTGGGGGGGGGGGGGAGCAGGAATTATGCCCCCTGGTAAGCAATTTGGTAAGCC

GGGGCTGGTCTGATTGTCGGGTTTCGGGTGCATGGATGCTCCACACACCTCAATCCGTACTTATAATTTGGGACGGAGATA  
GTATATAACAGTAGAGGTGGATAATCGATACACGCATTGAGTAACCTTTATATTATTTAAAAATAACATAGTTAGAAGGTTTC  
TTAGAAATAGAAAGAAATAGATACGATAGCTAATAGTTTGGAGTCTAAATCTAACAAATTAATAATTAGTAAAGTAATGATTATGCA  
AAACATACATCTGCTTCCCGTATCGCGTGCTTGCAACGTGCCGAGCCGAAGTCCCGATGTGCTGAGTCATAGGGGAGCCGAA  
CTGCTTCCCATATCCATATCGCGTGCTTAAACCCACACCCACTCGCTCCACATCGCCCGCCGCTCCACTCTCCCTCCACAC  
CTCCCCAT

>SsLRR-RLK325

CGTTGGGCGCGGTCTCTACTAGAGTTCTCATCCGATATGCTTTTGTGGGATGTGACCATGAAGTGGCGATGTAATTGAAGTAC  
TGAAGTTATGTTTAAACTATGTTGCTTCCGCTATTCAAACCTTGGTTGTAATATTTTATTTGCAACTCCGATGGATGTAAGCTGTA  
AGCTACTTGTGAAGTGTGTAACAGATGAGATGTTGTGTTGAATCATATACGATCTTGGCTTGTGTAAGTTGTTTGAATCTT  
TCATGATTTACGGACTACTGGGTTATGGGAGCACAAGTACAGGGATTGATCACTCCGGTGATTGTTTTTACTTACGTTT  
TTATAATTTAGTCGATTCTGTACAGCGGACCCACCAGCGGGCAGAGGAGGCAAAGCCTAGAAGTTTAAATTAGGCTATT  
ACCCCTCTAGCTATTTGGACCTTTCAGCGAAGAAGAACCCAGGTGGCTTCAACGAGACCAGATGGCGCGAGGCAGAT  
CCACGACAGCTCCTCCCTTCTACCTTGGCGCTCATCTCCCGCTCGACCATAAAGCCGTGCTCCTTCTCCCTCCCCATCTCT  
TGATTGGCTTGTCTTTTTTCTCTGGCTGCTCCCTTCGCACGTGCGACATGGCTCACTTGTGCTCCCAGGAAGGCAACG  
AACTGACGCTGGGGAGGCAAGAACCCCTTGGCGAGCAGCGTATTAGGCAGCAACACACAAGGCAGCAGCGCATCAGACAG  
TGGCAGATGAATTTGTGAGTTCTGTCAATTTAGCTCAGGTTTTCAGGGACCTGTGCGGTTTCGGGGCGGGTGGGAAATTT  
ACCCGTGGAGGAGTTTCGGGGCCAGGGCGGGTCTGATTGTGCGGTTTCGAGTGGCGGTGCGTTGATGCTCCACCCGCCCCG  
ACCCGCTCCGTGCCATCTTTACTTATAATTTGGGATGGAAGGAGTATACACCCAATAGTAGAGATGGATAATCGATACACAC  
ATTGAGTAACTTTATATTATTTAAAAATAACAGAGTTAGAAGGTTTCTTAGAAATGGAAGAATAGATGCGATAGCTAATAGT  
TTGAGTCTAATCTAACAATTAATAATTAGTAAAGTAATGATTTTTTTGGCAACTAATAGTAAAGTAATGATTAACAAA  
ATACATCTGCTTCCCATATCGCACGTTGCAACGTGCCAACTGCCGATGTGCTGAGCCATAGGGGAGCCGGACTGCTTCCC  
ATATCCATATCGCGTTAAGGCTACCTGCAGCGGCATCTGCAACGCCCTGCAATATATGATAGCGGACCACGCGAGCCGCGAG  
CGGAGTACTGGATGCTGTCTGCTATCCATGCGTCAACGGTAAAGCGTTGTACCGTAGTGTGTAGCGTACTGCGCGCC  
ACTCTACTGCTTGCATGTGCGTGGAGAGAGAAAAAAGGGAAGAAAAAAGAGTATGGCATGTAGGCCCGCG  
TGCTAGTAGTTGATATAGAGTATGAAATATAGAATATGATGGGTGCGGAAGTACTGGATATAGAGGAGAGAATATAGATGACC  
AGGATGCATATTCCTTTTAGTGGATGAATTTAGGGTGTGTTAGTTTCCCATTTACCTAAAAAATTTTGGTATTTGGCCCAT  
CATTTTGCAAAATGGAATCAAAACCATGCAAAAATTTTGGCAAAAAGGTATCCATTCTTCATTTTGGAAAAAAGCCAAA  
AAGCTCTCACCCACCCATGAAAAATTTAGCATTTTGGATAGAACTAAACACACCCATAAAAAATTTAGCATTTTGTATTTT  
TATTCTAAAGTAATTTGGTATTTTATATTTTGTATTCCATGAGAACTAGACACAGCCTCAGAGTATAACGAGTGCAGAAAGCCT  
AAAACCCACACCCCTTGATGACAGTTAAGCGGAAGGCCCCCACTCTTCCACATCGCCCGCCGCTCCACTCTCCCTCCAG  
TCCTCCACACCTCC

>SsLRR-RLK334

GAGGAGAGCTTGCCGAAGGCGAAGAGTAGAGCTCATCACGACGTGTGGAGCAAGCGGATCTAGGAGTACTTCCCATATGTT  
GACGCGCTAATCTACAGATGATCTTGAGAAACATATATAGTTTAAATTATGCTTATTTAAATTTTCTATAGTAGAATATAATT  
GGTAATTTAGATATAGATATGTAGGATAATTTAGTTTACATTAATGACAATAGAAGAAGTTAATTTAAATACAAATTTAAGGG  
GTATCCCACGTAATGGAATATAATATGATACTCCCTCCATCCCAAATATAAGTCAATTTCAAGAATCTCGTAGAGTCAAAACAT  
CTCAAGTTTGATCAAAATTATAGAAAAAAATTACAAAGATTTATGACATCAAAATAGATATAGTAATATAATTAATGA  
AGAACCTAATGATACTTAGTTGGTATTATAAATGTTATTATCTTATCATATACATTTGGTTAGACTTGAGATACTTTGACTCTCCA  
AGATTCTTAAATGACTTATAATTAAGGATGACAATCAGGCGGGTTAGACCCAGACCCGAGGTTTAGACCCGACGGGG  
GCGAGTCTTGGGTTTCAGGAACCCGAACCGGGTTGGGTGTGGGGCAGGTTTGTATCCCTGTGGGTGCCACGGGGCT  
CGAAAGTATGACCCGACTACCTTGTCCGAGTCCCATCTGCTGCTGCTCCGTGCTTCTCTTCCCGTAGGGCGTAG  
TCCCGTCCGCTCCGCATAGCCGCGTCTCGTCCGTGCCCTCCACCTTCTCCCTTCTGCGACGGCGGAGGCAGATCCACGGTGG  
CTTCCACGAGACGCGACACGCGAGGCAGATCCACGACAGCTCTCCCTTCTACCTTGGCGCTCATCTCCGCTCGACCAT  
AGAGCGTGCTCCTTCTCCCTCCCATCTCTGATTGGCTTTGTTCTTTTTTCTCTGGCTGCTCCCTCGCACGCTCGC  
ACATGGCTCACTTGTGCTCCTAGTAAGGCGACGAAGTGGGCTGGGGAGACAAAAACCCCTTGGCGAGCAGTGTATTAGAT  
AGCAGCACACAAGATAGCAGCGCATCAGACAGCGCCGATGAATTCGTGAGTTCTTGTCAATTTAGCTCGGGTTTCAAGA  
AACCTGCCGGGTTTATAGGACCCGTCGGGTTTGGGGCAGGTGGGAAATTTACCCGTGGAGGAGTTTCGGGGCCGGGGCA  
GGTCTGATTGTGCGGTTTCGGGGCAGCCCGACCCACCCGTTGCCATCCTTACTTATAATTTGGGATGAGGGAGTATATA  
TACTAGAGATAGATAATTGATACACGCATTGAGTAACCTTTATATTATTTAAAAATAACAGAGTTAGAAGGTTTCTTAGAAAT  
AGAAGAATAGATGCGAGCATCTCCAAGAGTTTGCCAAATCAATTTGGCATCCATTATTTTGGTAAACAGAAAAAATTATG  
CTTAATAATTTGGCATCACTTGGCAAAATTTAGTAACTTGACAAATCTCCCCCTCCACGCGTATTTGCGTGTAAAGC  
CGAGCGCATCCGGCTTCACTGCAAAATTAAGCGGGGCTCTTCTGTTTCTTAGCGGGGCTCTTCTGTTTCTAACGGGGCTC  
TTATTCTGTTAGCGGGCCTCTTCTATTTTACCAAGTCCAAATGGCAAACTCTTGGAGAGAGTCTATTTTCTCACTTACCATA  
TATTTTAGCTAATTTGCCAAATCACGATATTTGTCAAGTGAATTTGGCAAACTCTCGGAGATGCTCTAGTTTGGAGTCTAATCT  
AACAATTTAAGTTTGAAGTAATGATTATGCAAAACATCATCTGCTTCCCGTATCGCGTGTGTTGCAAGTCCGCGGCG  
AACTGCCGAAGTCCGATGTGCTGAGTCATAGGGGAGCCGAAGTCTTCCCATATCCATATCGCGTGCTTAAACCCACAC  
CCCCCTGAT

>SsLRR-RLK67

CAAGGAAGGGAAGAAGAGGCCGGGGCAGTGACAAACGGCTAACAGATCATTTTTTGTTTGAAGGCGGGGGAAGCTGCAGT  
TTGCATTTGACGCCAGGAAGAGCCTTTTACACCTGGGCTGGACCAACGCCGCGCGGCTGGCTGGCTTCTCTGTCACTCTC  
TCTCTCTATCTCTGGCTAGAGGCCGCTTCGGTTCTCGTGCACTACCGAACCAACCCGGGCTAGAACTTGTTCGGGGT  
GCTGCTACGGCCACCCCTAGAGTCTGCAAGGGATAGCGAGAGGTGAGGGCTGAGGAGCCTTCTACCATGCTTCCCGC  
ATTTCTCAAAACTGATCTCTTGACTTTGTGGTGACTCCCTGTGACCGGCTAAGGCCCCACAGGGTTGAGCACACCAAAGGAT  
GTTTCTTAGCAAACTGGCCACTGGGTTTTTTTTATCTGGCCATAACAATATAAAGATCAATTTATTCACATTTTCTCTTGTAC  
AATCATGCTAATGGACATTTAATTACGGTAAATGACATGCTACGGAGAATGCGCCAGCTAGGATTTTAAATTCGGTATTGCAA  
AAATTTTGGCCACAACCGGAAATTCGCGAATTTGCGCAAAATTCGGCCGAAATTTACCAAAATTTTATAGAAAACTAGCACATA  
AAGTATGATTTTCTGAAAAATAGATTTAAACACATATTAGTATGAATTATTAACAATCTATTGAATAGAAAGATATGCAAT  
ATAAACAATAGAAAATGTGAGTCTAGAATTATATAGCACATGCAATTAGTGATTACAAAAATTTAGATTTTCTTTCGGCCACC  
ACAAAAAATCAGAAATTCAGCCAAAATTAATTTGAACCTGTGCGGACCCATTTTGGCATGTTGAATTTCTTACTTT  
TGACGGCCATATTATCGGTTACTTGAATCGTGTATCAACCTACTATAAATACAAGCATATCCAATGCTTGGTCCACTATGAA  
CGTCACTTGTGCTACTTTTATAAGTCCACTTGTAAACGTTTTCGATGCCGACAAACGGCTATTTGACCAACAAGGATGGG  
GACGGTTAATTACCAACGACTACATTGACCAACAAGGATGAAATGCGATTAATTAACCAAGTACAGTTGTGTCGCGCCGAT  
TTTACTTGAAGAAATGATCCCTCCCGAATCCCAATTGCTCGGCGACCACTTATAGTGATACATCAACCATCAGCGTG  
AGCCATCTTGGTAGAATTAGCCCAATAGATGCGTTTGTGACATGTTTCTTACTAGGGCTTTTTTGTAGTTAGTCAGGGCCTA  
TCTGGCTGGGTGTACTCCCTCCGTATCGGATTTATAAGTCTGTTTGGATGAGGTTTGTAGTCAAAACATTGAGAAATATAAATCATT  
AATAAGTTTAAAGTTTGTAGTTTGTGAAATATAAAAAATATAGTAAATGATTATCTTGAAAAAATACTTATGAAAAATATACAT  
ATATCACTTTTTTATAAATATTTTTTATAAAAAATAAGAGGTCAAAGTTGTGTTTTGGAGACCGTGTGCTGTCTTAAACGACTT  
CTAAACCGATACGGAGCGAGTACCTCCGTTGGTTACCCACCGACAGCTGTGTCGTGCTAATTTACTTGTGAAAAATGATCCC  
TCCTGAATCCCAATTGCTCGGCACACCATTTTATTAGTGATACATCTACCACTCAGCGTGAGCCATCTAGGTAGAATTAGCCT

CGGTTTGATGACATGTTCTTACTTAGGGTCTTTTTTTTTTTGAGTTAGTCAAGGCCTATCTGGCTGGGTGTACCTCCGTTGG  
GTTCCCTACCAAAATCACCCTGTGATTTACTTCTCTCCATCTATAAGAGGAAACCATGGAGAGCGAGCCTTCGAATTCTGTG  
ACGGTGTGACCACAAGTCCAAAAATAACTCCCTCCTCAAAACCTCCCCACGCTCTCCACTCGCCACCACCGCCACCGCC  
AGCCA

>SsLRR-RLK90

TTACGGGTTTGCCCTACGAAATATCGTCAGCGTTGTAGTATGGCAACTAAATCCGGAGAGTGGTGTTTTACACTAGCTACTCA  
GATTTAGGTGAAAGTTTCATCCGCGATCTTTGCATCTCTAGTTAAAGCGGGTTAGGAACTTGTGCGTCTGCAGGAAAGCCGTA  
GAAACGTCATCCGCTGCATCACATCACATGAACCGATGGCTGCAAAAGTAGTGGTGGCACTTGCCGTTTGGCACTCCGGCCG  
GCCGGCCGATGGCGTGGGAGGCGATGCACGCCCCCGCGGCCACGCCGAGCACGCACCGCGCTGCCGCCCGCCGCCA  
GCTTCTCGGCGTCCGTTCCCGGCCAGGCGGTGCGCGCTTCTTCCGGCCCTCGGATCCTACGCGCTACACGCTAATCCC  
TAGCCTGGCTCGCAGCGTACCGCGCGGACGCGCTCCAAAATCCGGCGGCCGGGAGGTCTCTCGCCCTCACGTTGCCT  
GCCAGCCGATCGATGGCGTGGCAGCCCCGTTCAAAACCTTTGCAACTCGGCCCGCCCGCAGAGGGTCAACCGCGTCCGCG  
CGCCGCCGAAGCGTGGCTGCAGGCTGCACGCGCCGTGCCGGCCCAACCGCTCGCTTTGTCCAGGCTCCCAGCCCTCGCC  
GCGCATGCTCGACACGCGCAGTGCAGCAGCCGCGAGCCAAAAACGGGCGGCGCCCAACCGATTTCAGCCCGCCGCG  
AGCACGGCTCTCCCGGAAGAAGCTGAAACGCTTCAGTTGCACACCGGCTGGACGGCAGAGAGTAGCGCGTGGCAGCCCA  
GTGCAGTTGCCGTGGGAAGGAAGAGAGGCCGGGCGAGGCGAGTGACAGATTGGCTTTGTTGAAGGCGGGCAAAAGC  
AGCAGTTTGTCATTTGCCACCGGGAAGAAGCCAATGCCAAGTCAATAAGTTTCACTCCAGTAGCCTGCCATCGGACCAT  
GCCACGCGAGAGAGCCATTACATCTGGGCTGGACACCAACGGCGCGCGGCTGGCTCTGGCTGACTGGCTTCACTGTAC  
ACATTCCACTGGCTAGACGCGCTCTCGGTTCTCGTGCATGCCGAACCGCCCCAGGTGCTGCAGTACGGCTACCCCTGGA  
GTGATAGAGAGCAGCAGGGTGAGGGGCCCTTCTACGAGGCCACCATGCCTCCGGCATTCTCAAACTGATCTCTTGGG  
GAGTATGAGTGCATGAGCCACACAGGATTAAGCACATTAAGGATGTTCTTGGTAAACCAATATAGAGATTTA  
TTTATCTAGCCGTAACAATATAAGGATCAATTTACTCACATTTCTCTTTCGTTAAACATGGTAAATGGACTTTAAGTATGGCA  
AATGACATGCTACAGAGAATGTGCCGGCCATTTGCCGCCATTTGAAATTTTCTTACCTTTGGGTTTCAGTAGCCAGATCATC  
GATTACTTGAATCGTGTCTCAACCTATTATAAATACGGGCATCAAAATGTTGGTCCATTGCTAACGTCATGCTGTCTAG  
TTTCATAAGTCCACCTGTAACATTTTCGATGCCGACAAACGGCTATTTTGACCAACAAGGATGGGAGACGGTTAATTACCA  
AAGACTATATAACCCAACAAGAATGGAAGGTGATTAATTACCCAGCGACAAAATGTATCCCTCCCGAATTCAAATTGCTCGG  
CACACCGCACCATTTCATTAGTGATACATCTACCACTCAGCTGAACACCTCGGTAGAATTACCTCGATAGATGCCCTTTG  
GGTGACATGTTTCTTACAGGCGCTATCTAGGTGATCTTGGGTTCCCTTAGCAAAATCACCTTGTGCTACTTCTCTTCC  
CTGTATAAGAGTAAACCATGGAGCCTTCCAATTCTGTGACCAAAACGCAACTCCCTCCTCAAAACCGGGCACTCGGCAACT  
CCAGCTCTCTCACTCGCCACCACCGCCACCGCCAGC

>SsLRR-RLK109

AGATGAAACTCATTTCTTCTCTCTTCTTAAATACACTGCCATATCATTAATAAGTGCATATGTGGCAACCCATTTAATGCAAA  
TGAAACTCACATGAAACTTCCACTAAGACTGGCCTAAGGGATAGCGAGCAGGGTGAGGGGCCGTGAGGGGCCCTTCTACCATG  
CTTCCCGCATTTCTCAAACTGATCTCTCGGCTCTCGTGGCCTTGTGGTACTGGTGACCCCTGTGACCGGCTAAGGCCACA  
CAGGATTGAGCACACCAAAAGGATGTTCTTAGCAAAAACCGGTTACTGGGTTATTATCTGGCCATAACAATATAGAGATCA  
ATTTATTCATTTTCTCTTTGTAATAATCATGCTGATGGTAATGGACCTTTAATTATGGTAAATGACATGCTACGGAGAATGTGC  
CAGTAGGGGTTTTCATTTTCGGTATTGCAAAAATTTTGCCACCACCGGAAATACCGAATGTGCGGAAATTTGGCCGAAATTT  
CACTGGATTTTTTAGAAAACTAGACATAAAGTATGATTTTCTGAAAAAATAGATCTAAACATATAGTATGAATTAT  
ACTAACATCTATTGAATAGAAGAATATGCAATATAAACAATAAATAAATGTGAGTCTAGAATTATATAGCACATGCATTAGTGTAT  
TACAAAATTTCCGATCTTTCTTTCCGCCACCACAGAAATTTGCGAAATTCGGCCGAAATTAATTTGAACCTTGGCGCAACCC  
ATTTTGTGTGGTTGAATTTCTTACTTTTCGACGGCCATATCATCGGTTACTTGAATCGTGTGCATCAACCTACTATAAATACA  
GGCATATCAAAATGCTTGGTCCACTGCGAACGTCATTTGTGCTACTTTTATAAGTGCATGGTAAACGTTTTCGATGCCGACA  
AGGATGGGAGACGGTTAATTACCAACGACTACATTGACCAACAAGGATGGAATGTGATTAATTACCCAGCGACAGCTGTGT  
CACGCCGATTACTTGTGAAAAATGTATCCCTCCTGAATCCCAATTGCTCAGCACACCATTTTCATTAGTGATACATACCCAC  
TCAGCGTGAGCCATCTTGATAGAATTAGCTCAATAGATGCGTTTGTGATGACATGTTTCTTATTCAGGCGCTTTTTTTAGTTAG  
TCAGGGCCTATCTGGCTGGGTGTACCTCCGTTGGGTTCCCTTACCAAAATCACCCCTATGATTACTTCTCTTCCATCTATAAGA  
GGAAACCATGGAGAGCGAGCCTTCGAATTCTGTGACGGTGTAAACCAAAAAGTCCAATATAAGGATCAATTTACTCACATTTT  
CTCTTTGTTAAACATGGTAAATGGATTTAAGTATGGCAAATGACATGCTACAAAGAATGTGCCAGCCATTTTGCCGCGATT  
TGAAATTTTCTTACCTTTGGGTTTTTGGCAGCCAGATCATCTGATTACTTGAATCGTGCCGTCACCTACTATAAATACGGGCATA  
TCCAAATGCTTGGTCCATTGCTAACGTCATTTGTCACTACTTTTATAAGTCCGCTGTAAACGTTTTCGATGCCGACAAACGGC  
TATTTTGACCAACAAGGATGGGAGACGGTTAATTACCAAAAGATATATAACCCAACAAGAATGGATGGTGATTAATTACCC  
AGCGACAAAATGCTCCCTCCCAATTTCAATTGCTCGGCACCGCACCATTTCCATTAGTGATACATCACCCACTCAGCG  
TGAACCACTCGGTAGAAATTACCTCGATAGATGCCCTTGGGTGACATGTTTCTTACTCAAGGCCTATCTAGGTGTACCTCCATT  
GGGTTCCTTAGCAAAATCACCTCTGCACTTCTCTTCCCTGTATAAGAGTAAACCATGGAGCCTTCCAATTCTGTGACCAAA  
ACGCAACTCCCTCCTCAAAACCGGGCACTCGGCCACTCCACGCTCTCTCCCTCGCCACCACCGCCACCGCCAGCCATGG  
AT

>SsLRR-RLK110

TCGCCGCGCCATGCTCGACCATGCGCACGCGGTCCGTGGACAAAAACAGGCGGTGGTGCCACCGCCAGCACCCTCTCC  
CGGAAGAAACGCTTCAGTTGCACACCGGCTGGACGCCAGAGTAGCGCGCTGCCAGCCAGTGCAAGTGCAGTGGCGGTT  
GCCGTCGGAAACCAAGGAAGGGAGGAAGAGGCCGGGCGAGTGACAAAACGGCTAACAGATCATTTTGTGTAAGCGGGGG  
AAAGCAGCAGTTTGCATTGTCAGCCAGGAAGAAGCCAATGCCATGCCACTGCCACGCTAGAGAGCCTTTTATACCTGGGCT  
GGACACCAACGCGCGGCGACTGGCTGGCTTCTCTGTCACTCTCTCTCTATCCTTTGGCTAGAGGCGCGCTTCGGTTCTCGT  
GCACTGCCGAACCAACCTAGGCTGAACCTGTTTCTGGGCTGCTGCTACGGCTACCCCTAGAGTCTGCAAGGGATAGCGAGC  
AGGGTGAGGGCCTGAGGAGCAGCCTTCTACCATGCTTCCCGCATTTCTCAAACTGATCTCTTGACTCTTGTGGCCTTGTG  
GTGACTCCTGTGACCGGCTAAGGCCACACAGGGTTGAGCATTTCTTAGAAAACTGGCCACTGGGTTATTATCTGGACAT  
AACAATATAAAGATCAATTTATTCACATTTTCTCTTTGTAAACCATGCTAATGGTAATGGACCTTTAATTACGGTAAATGACA  
AACTACGAAGAAAGCGCCAGCCAGCAAGATTTCTAATTTTGGTACTGCAAAAATTTCCGGCCACCACCGAAATACCGAATTTTAC  
GAAATTCGGCCGATATTTACCGATTTTTTTTAAAAAAAACCTAGCACATAAAGAATCTTTTTCTGAAAAAATAAATCTAAA  
CACATATTAGTATGATTATGACTCCACATCTATTAAATAGAAGAATATGAAATATAAACAATAGAAAATGTGAGTCTAGAATTA  
TATAGCATGCTATTAGTATTACAAAATTTAGATCTTTCTTCCGGCCACCACAGAAATTCGCGCAATTCGGCCGAAATTA  
ATTTTGAACCTTGGTGTACGGCATTTTGGCGTGGTTTGAATTTTCTTACTTTTCGACGGCCATATCATCAGTTACTTGAATCGT  
GTATCAACCTACTATAAATACAGGCATATCCAATGCTTGGTCCACTGCGAACGTCATTTGTGCTACTTTTATAAGTGAC  
TGGTAACGTTTTTCGATGCCGACAAGGATGGGAGACGGTTAATTACCAACGACTACATTGACCAACAAGGATGGAATGTGAT  
TAATTAGGTCAAGTCTCAGTGGAGAGTTTCAATTTCTTATTTTCCAGACTGCCATGTATAGAGAAATGAAATGAAACTCGGATA  
AAACACTCACTCTCAATGGAAAGTTTCACTCCATAGTTTCATAGACATTTAATTCTATGACTCATAGAGAGTTGGTAACCTGTG  
CCAAGAGAGTTTCACTCCCATGAAACTCAATTTCTCTCTCTTCAATTAACCGTTGACATGTCATCAAAAATGCAATGTGG  
CAGGCTATTAAATGCAAAATGAAACTCTAGTGAAACTCACATGAGACTGGCCTTACCCAGCAACAGTGTGTCACGCAAT  
TACTTGTGAAAAAATGTATCCCTCCCGAATCCCAATTGCTCGGCACACCATTTTCATTAGTGATACATCTACCCACTCAGCGTG  
AGCCATCTAGGTAGAATTAGCTCAATAGATGCGTTTGATGACATGTTTCTTACTTAGGGCCTTTTTTAGTTAGTCAAGGCCTA  
TCTGGCTGGGTGTACCTCCGTTGGGTTCCCTACCAAAATCACCTGTGATTACTTCTTCCATCTATAAGAGGAAACCATG

GAGAGCGAGCCTTCGAATTTCTGTGACGGCGTGACCAAAAGTCCAAAACATAACTCCCTCCTCAAAACCTCCCCACGCTCTC  
CACTCGCCACCACAGCCAGCCA  
>SsLRR-RLK132  
CCGGCAGAGGGTCACCCGCCGCGTCGCGCGCCGCCGAAGCCTGGCTGCAGCATGCACGCGCCGTGCCCGGCCAAACCGCT  
CGGTTTGTCCAAGTCCTCGCCGCCCATGCTCGACCATGCGCACGCGGTCCGTGGAGCGCAGCCGCCAGCCAAAAACAGGG  
GGTGCCACCGGTTTCCAGCCCACTGCCAGCACCGCTCTCCGGAAGAAACGCTTCAGTTGCACACCGGCTGGACGCCAG  
AGAGTAGCGCGCTGCCAGCCCACTGTCAGTGCCTGAGGCGTTGCCGTGCGAACGAAGGAGGGGAGGAAGAGACCGGGGCA  
GTGACAAACGGCTAACAGATCATTTTGTGTTGAAGGCGGGGAAAGCAGCAGTTTGCATTGTCTGCCGAGAAGAAGCCGTTT  
ATTTTAAACCAGCCAGTAATATTTTCTCTCACATAAATAGTCAACAGGACTTTTTCAGTTCGCTTATTTTCAGCCAAACGAACA  
GACTTGATTTTCTCTTCTCTCCCGTAGCCTCGTCCATGGGGACCATGCCACTGCCACGCTAGAGAGCCTTGCACCTGGGCT  
GGACACCAACGCCGGCGGGCTGGCTGGCTCTGGCTGACCGGCTTCTGTCTCTCTCTATCCTCTAGCTAGAGGCCGCTTCG  
GTTCTCGTGCCTGCCGAACCAACCGGGCTAGAATCGTTTCTGGGTGCTGTCTACGGCCACCCCTAGAGTCTGTAGGG  
ATAGCGAGCAGGGTGAGGCGCTGAGGAGCCTTCTACCATGCTTCACGCATTCTCAAACTGATCTCTTGACTCTTGTGGC  
CTTGTGGTGACTCCCTGTGACCGGCTAAGGCCACACAGGGTTGAGCACACCAAAAGGATGTTTCTTAGCAAAAACCGGTTAC  
TGGGTTTATTTATCTGGCTATAATAATATAAAGATCAATATATTCACATTTTCTCTTTGTAAACCATGCTAATGGTAATGGACCT  
TTAATTACGGTAAATGACATACTACGAAGAAAGCGCCACGATGATTTCTAATTTTGGTATTGCAAAAATTTTCGGCCACCAC  
GAAATTACCGAATTTTACGAAATTCGGCGGATATTTACCATTTTAAAAAACTAGCACATAAAGATTTCTTTTCTGAA  
AAAAATAAATCTAAACACATATAGTATGATTTATGACTCCACATCTATTAATAGAAGAATATGCAATATAACAATAGAAA  
ATGTGAGTTTGAATATATAGCACATGCATAGTGTATTACAAAATTTTCAGATCTTTCTTTTCGGCCACCACAGAAATTCGTGA  
AATTCGGCCGAAATTAATTTTCAACCCTGGTGCCAGGCATTTTGGCGTGGTTGAATTTTCTTACTTTTCGACGGCCATATCAT  
CGGTGCTCCAATAGCCCGGATGTACAGCTAGAGGACAAAACATAAGCTTGGTCCACTGCCAACATGCTTGTGCTAGGCTA  
CTTTCATAAGTGCCTGGTAACGTTTTCGATGCGGACAAACGGCTATTTGACCCAACAAGGATGGGAGACGGTTAATTATC  
AACGATACATTTGACCAAAACAAGGATGGAATGCGGATTAATTAACCGAGCACAACCTGTGTGCGCGCGGATTTACTTGTGAAAAA  
TGATCCCTCCCAAATCCCAATTTGCTCGGCACACCATTTCAATTAGTGATACATCTACCCACTCAGCGTGAGCCATCTAGGTAGA  
ATTAGCCCAATAGATGCGTTTGTGACATGTTTCTTACTTAGGGTCTTTTTTTTTTAGTTAGTCAGGGCCTATCTGGCTGGGTG  
TACCTCCGTGGGTTCCCTACCAAAATCACCCTATGATTACTTCTCTCCATCTATAAGAGGAAACCATGGAGAGCGAGCCT  
TCGAATCTGTGACGGTGTGACCAAAAAGTCCAAAACATAACTCCCTCCTCAAAACCTCCCCACGCTCTCCACTCGCCACC  
ACCGCCAGCGCCAGCCATGGA  
>SsLRR-RLK120  
TTGCTAGTCAATATATAGTCCAAGCAAGGTCCAAGTGATGACCAAGAACAACCCAATATATATGCAAGGCTTGTGGAGCGTTGC  
TTCTTCATCTCACCCCATCTTTTGACCCGACCAACCATCTAGCTCATCATCACACAACGATGACCGCTCAGCAGTGTGCCA  
AACGACTTTTACTCACACCCCACTCCAGAGTACACTGTTTCATCTTCCAGTCAAGCCGATAAATGTATCATGCTGCATGCTCTT  
GCTCGTTTCATCTCCACCTTTGCTTCCATGCATTCAGTGCATAGTGGCACACGTCCAACCTGTGGTGCATGGATGGAGT  
TTGGAACACAGGGTCCATGGAATTTTGTCTACAGTAAATGTGACCCTAATTTTGTATGGAGATTTTGGCGGATAGCGAAGTT  
TCAGTGTCCAATAGCCCGGATGTGACAGTAGAGGACAAAACATAAAGTGTGTGCAATGGCTAAGGTCATGTTTGTAT  
CGGTTTCGGATTCTTAAAAACAAGTTTGTGCTCTAGTTTCTAAAATCTGGATTCTGAGTAAAAACTGGTGGGGTGTGTTGGAT  
CCCCAGTTTAAATAATCTGACTTCATTTATTGCTCACTAAGTCAATAAGAACTGACAAAAAGTATAGGTATCAACAACCTCTCTG  
GTTTTAAAGTATGCAAAAACCTAACAGCAAAAACCTGGTCTGTTGGATCCCAACCAAGTTTCCAAAGGATGATTTTAA  
AACTGGCAAAAACCTGGAGGAATCCAAACCGGACTTAAACACCCGTTGATAGGTATATATTTCCCTCTGTCTTAAAAACATA  
ATATATTTAATTAATCAAAAATATGTTCTAAATTATAAGAACTCTAGGTGAACCTAACCTCAACTCAGTTTAGAAATGCAGCAT  
TAATTCATACTACTATTAATGATGCCTATATATCAGCAATCCAATATATAGTAATTTATCTCTTAATGATTAAAGAAGGCCACA  
TGCTTCATTTGCTTTACCCCGTAATATCTATATTTATATCTATATCTATGTCTGATATTAAGAGTGAATGGTTTCTTTAGACTTTT  
CTTACTTTCCAAAATGCCCATGTGTCTCTCATGTCTTGTGTTGTGACCCGAACCTACGAATCATGTTTATACGAATTAGAACAACT  
CAGCTTTAGTGATGATATAGAATGTCCAACATGATTAGGTTCCATTCAGCAGCTTGAACAAGTTTCGCTTGTATATATCTTAA  
ATTCTTTGGATACAGAGTACATTAATTTATCTCTTGAACCTTGGCTCAGTTTGTATATCTTACATATTTGACCAAGATTATTA  
AGCAAAACACACCTTGATCACACTTTTGTGCGGTAGCATGCTTGTGTTTTTTGTGCGGACATGAGGGCGAAGCTTCTCTTGT  
CAAAAGCTCGGGTTGCGAGGGTAGAGGAGGAAAAAACATGAGTGTAGATATGGCTAAACACTTGACCGCCTCGCCCTC  
TTTATACAAATGTTTAAAGCATTATAAAAATTTATCCCAAATTTAAACAAATTTAGGTAAAGTTAACCTTCAATTTTTTTTTTAA  
AAAGACAACATTCGCGTTGGCTCATAAATGGAATCTATACAAATGTTTGTGGATGGAGTGAATGGTTTCTTAAACAACTGTG  
CACTTTGTATTACTCTACATGTGGCACCAGACTAAGCAAAGCATGTTGATTACATTTTGTAGAGTATCATATACTTCTTTT  
CAGCAGTGGCTTGTCTCTCCCACTAATTAATACTTATATAATCCAAACCTTGTCTGCTACTTACTCTAATCCGGTCTATC  
ATTAACACTTTGCTAGTGCATCTGCAGACTGAGGGCGGGCCCCCTACTGAGGACGTCGAGTACTGCCACCTTAAAC  
CAGTCAAAACATCCACAGCTGACACCGAGGAACCAACGAACACGCGTATCCTTCGCTCCCCGACGCGCGCGCC  
>SsLRR-RLK141  
CCCAGATTCTGACTTAGGTAGTAATATTGTCTTCCAACACCTTCGTGAGACTCACAGACTTCAACTAGGCCACTGAATGGTTT  
GGGCTTCTCGAACTCTTGAACCTTTGAATTATGGCTTTATAATGGACTTGTGATGGTACTTGTGGTTTGTATGGACTAAAAGA  
TTTTGAATTATGGCATGTAATTGTGGTTTGTATGGACTAAAGGACTTTGAATCATGGCATGTAATTGTGGTTTCGTACGGATTAT  
GGCTACTTGTGATGGTACTTGTGAATTATGACTATATAATGGCTCTTGTGGTTAGATTGAAATTGAATTGAATTATATATATATA  
TCATGTGGTCAGATTTGAATTTAAATTATATTTTTTCTGAAAAACCCACTGTAGGGGCGGTTGAATCATCAACCCCCCTTAC  
AAATGCCATTTGTAAGGGCGGTTGGATACGAACCCCTCTTACAAATGGCATTGTAAGGGCGGTTGGATACCGAACCCCTC  
TTACAAATTCATTATAAGAGGGGTTCTGTATCCAACCGCCCTTACAAATGTCATTGTAAGGGCGGTTGCCCCAACCGCCC  
TTACAGTGGGCTGATTTTTAAAGCTCCCTGGTAAGAGGGGTTGGGTTACCCGCCCTTAAAAACCCCTGAGACCCCGCCCTTA  
AAAACCCCTGGCTGTAGTAGTGTTTAAAGAATCTGACAAAAACTAACAGCAAAAACCTGGCCTATTGGATCCCAACCCAGTT  
TCCAAAAGCCAAATTTCTAAAAACTGGCAAAAACCTGGAGGAATCCAAACCGGACTTAAACACCTGTTGGTAGGTATATAT  
TCCCTCTGTCTAAACACATAATATATTTAATTATCAAAATATGTTCTAAATATAAGAACTCTAGATGAACCTAACCCCTCAACT  
CAGTTTAGAAATGCAGCATTTAATTCATACTACTATTAATTGATGCCTATATATCAGCAATCCAACATATTGTAATTTATCTCT  
AATGATTAAAGAAGGCCACATGCTTCATTGTCTTACCTCGTAATATCTATATCTATATCTATATCTATGCTGTGATATTAAGAGT  
GAATGGTTTCTTTAGACTTTTCTTACTTTCCAAAATGCCCATGCGTCTAATGTCTTGTGTTATACGAATTAGAACAACCTCAG  
TTTAGCGATGATACAGAATGTCCAACATGATTGAGTTCCATTGACGACTTAACAAGTTTCGCTTGTATATATCTTAAAAATCT  
TTGGATACAGAGTACATTAATTTATCCCTCTGAACCTTGGCTCAGTTTGTATATCTTACATATTTGACCAAGATTATTAAGCA  
AAAGCACACCTTGATCACACTTTTGTGCGGTAGCATGCTTTTTTTTTTGTGCGGACATGAGGGCGAAGCTTCTCTTGTCAATAAC  
TCGCGGGTTGCGAGGGTAGAGGAGGAAATAAACATGAGTGTAGATATGGCTAAACACTTGACCGCCTCGCCCTCTTTAT  
ACAATATGTTTAAAGCATTATAAAAATTTATCCCAAATTTTAAACAAATTTCTAGGTAAAGTTAACCTTCAATTTTTTTTTTAAAAA  
GACAATATTCGGCTTGGCTCATAAATATGGAATCTGACAAATTTCTGGATGGAGTGAGTATCTTCCAAACACTGTCACCT  
TTGTATTACTCCTACATGTGGCACCAGACTAAGCAAAGCACATGTTGATTACATTTTGTAGAGTATCATATACTTCTTTTTCAG  
CAGTGGCTTGTCTCTCCCACTAATTAACCCCTATACTATAATCCAAACCCCTGTCTGCTACTTACTCTTAATCCGGTCTATCATTA  
ACACTTTGCTAGTGTGCTGTCAGACTGAGGGCGGGCCCCCTACTGAGGACGTCGAGTACTGCCACCTTAAACACAG  
TCAAACATCCACACACTGACACCGAGGAACCAACGAACACGCGTATCCTTCGCTCCCCGACGCGCGCGCCA  
>SsLRR-RLK139  
GGATAATCAGCCCTGCTCTTTTCCATATATATGTGGCGAACCGTACGCTAATATGCACTATTTTTTACAACGATTGGCCTGACGT

GGTTCTAAACCTAATAATGCTTCTGGCCAATCAGGAGAGGCGAGAAACACATGATGATGAACAAGGGATTTTTTTTCTAAA  
AAACAATGGACTTGTCTATTGTCTCCTTTTTTCATGTCCACCACCGGTGAGTACATTTTATTTTATCTAATGGCAAGTGCATGGCA  
CCTTTTGAGTGAGCATCTATGTATCACCACCTTCCCGTCAACAACCTTATCCACCATGGATTCCCTCCACATGGACGCCACCAC  
CACCATCTCCACAAAAATTATATTGTTTTCATATATTTCCTTTTTTTGAGCGAGAAATTCAGAAAAGAACTAAATAAATT  
TGACTTTTCTATATATATTATGCTGTTCTTTCTAGGACAAATTTTTTCAGAAGTTTTATTCGGTGCTATCCAAACGGCGCTTT  
TGAAAAGAGGAAAAACATTGGAGCACACGTGTGCATTCCATTCTGTGGCATTTCATTTTTGAAGGAATTGTTCTCTTGATGT  
GTTAAATAGCAGTAAAGAATTTGTGCCGAATGCCTACAGCTGCTCTAGCAAGTAGCACTAATGGTGAAAGTGCCTAAATTCAT  
TTGAAAGTTCTTAATTATCCAGGTTGAGACTGAATAATGTTGACTGATGGAGTCTTCAGCCAAATCCAAGCTCAAAGCTTGC  
ATAACAATTATCAGCAGGCGTACCGCTACGCTTTTTACTCCATTAATCGAATATATAATAGTACAATAAACTAAAGTTCTAAT  
TCGGTTACTAAACTACTAAGCACTGCTGGCTGAACAGGAAAAAGATGCAGATTGGCGTATGCACACATTGCAAAACAACTA  
CTGGCAATAAAGCATGGCATCATTCAGGCCACTACTGAAGAAGCATCAGCAGCTGAGCGTGCAGTAGCGCTCACTTGTGT  
TCTTTTTTAATTGCTGCTACTTTCTGGTGCAGCCATAACACTACGCTCCTCAAATAACTCACTGCTTGTCAAGGGCTATAAAG  
AATTGATTTTTAGGAGATGGAAGCGGCTTTACATTGTGACGATGCTGCTGATCCTCCTCAAGTGTGAGCAATGATTGGGATT  
GGCATCCACTAGAGGCAGGCTTTGTCCTTGTTCCCATGGAGATTGCAGGATTAGCAGCTGCATGTGTTTGGCTGCTTGCAA  
GTTGATCTGCAGTTCACTGAGCTGTGCTTTATGCCTTCAGTAGTGTTCAGTTAACACTTAACAGCAGGGGGGCGTGAGT  
CTGTGACTGATTGACTGTGAGTGATGCCTCTCCACCACAACACAGTGTCTCCATTTCAGGTTTCAGCAGGAAATTAATATGC  
TGGATGCACAGATAATAGCATGATGGTGTCCGTAATCTATCTATTGACCACCGCTTCATGCAATTAACAGATAA  
CTGATTTACTATGTCAACTCTGAACAGAAAGCTGACGACTGACATGGCTTGCCGGCCAGTACATGTCAATCTCTTGACAGCA  
ATTGGTGAACATAATGGTTTACTGATCATATCTAAAAAAGCATGGTTCACTGATCACTTGCTGGAAGTGTGAACGCATT  
TGGGTTCACTAGTACTCGGCCGGGCGGGTTGGACTGGGTGAGCCGGGCGGGCCTGTGCCAGCTGTGGGCTGAAGAGT  
GGCAGGCCCATATGAGGCCCTGTCTCTCAGCTCTTGATTCTGAACGGCTAGTGGACATGCTGGGCTGACTGGGCCAG  
ACCTGACCAACTGACTGACTGCATGTCAATTTTGACCAGCAGCACTGCACAAGGAAAATTCCTGGACAACACAAGAGACA  
GAGAGAGCTAAAGAGACCACAAGAAGAGGCTGGAGAATGTTGCTCACTGGAGTGGACTGCACTGAGGTACCAATCAGTT  
TGTTGCGATTGGCAA

>SsLRR-RLK121

TGGATTCCCTCCACATGGACCCACCACCACATCTCCACAAAAATTATATTGTTTTCATATATTTCCTTTTTTTGAGCGAGA  
AATTGAGAAAAGAACTAAATAAATTTGACTTTTTCTATATATATTGATGCTGTTCTTTCTAGGACAAATTTTTGAGAAGTTTT  
ATTTGGTGCTATCCAAACGGCGCTTTTGGAAAAGAGGAAATATTCGAGCAGACAGTGTGCATTCCATTCTGTGGCAATTCATT  
TTTTGAAGGAATTGTTCTCTTGATGTGTTAAATAGCAGTAAAGAATTTGTGCCGAATGCCTACAGCTGCTCTAGCAAGTAGCA  
CTAATGGTGAAGTGCCTAAATTCATTTGAAAGTTCTTAATTAATTCAGGTTGAGACTGAATAATGTTGACTGATGGAGTCTTC  
AGCCAAATCCAAAGCTTGCATAACAATTATCAGCAGGCGTACCACGCTTTTTACTCCATTAATCGAATATAATA  
ATAGTACAATAAACTAAAGTTCTAATTCGGTTACTAACTACTAAGCACTGCTGGCTAAACAGGAAAAAGATGCAGATTGGC  
GTATGCACACATTGCAAAACAACTACTGGCAAATAAAGCATGGCATCATTCAGGCCACTGTGAAGAAGCATCAGCAGCTG  
AGCGTGCAGTAGCGCTCACTTGTGTTCTTTTTTTAATTGCTGCTACTTTCTGGTGCAGCCTAATACACTACGCTCCTCAAAT  
AACTACGCTTGTGAGGGCTATAAAGAATTGATTTTAGGAGATGGAAGCGGCTTACATTGTGACGATGCTGCTGATCCT  
CCTCAAGTGTGAGCAATGATTGGGATTGGCATCCACTAGAGGCAGGCTTTGTCTTGTTCCTCATGGAGATTGCAGGATTAG  
CAGCTGCAGTGTGTTGCTGCTTGCAAGTTGATCTGCAGTTCACTGGAAGTGTGCTTTATGCCTCAGTAGTGTGTTTCAGTTA  
ACACTTAACAGCAGGGGGGCGTGAGTCTGTGACTGATGTGAGTGTGAGTGTGCTCTCCACCACAGCAGTGTCTCCTCAAT  
TCAGGTTTCAGCAGGAAATTAATATGCTGGATGCACAGATAATATACTAGCATGATGGTGTGCGTAATCTATCATTGACCACCG  
CTTCATGTCAACTCTTAACAGAAACACTGATTTACTATGTCAACTCTGAACAGAAAGCTGACGACTGACATGGCTTGCCGGC  
CGGTACATGTCAATCTCTTGACAGCAATTGGTGAACATAATGGTTTACTGATCATATCTAAAAAAGCATGGTTCACTGATCA  
CTGCTCTGGAAGTGTGAACGCATTGGGTTCACTGATGATGCTGAGGCGGCTTGGACTGGGTGAGCCGGGCGGGC  
TGTGCCAGCTGTGGGCTGAAGAGTGGGACGGCCCATATGAGGCCCTGTCTCTCAGCTCTTGATTCTGAACGGCTAGTGG  
ACATGCTGGGCTTGACTGGGCCAGACCTGACCAACTGACTGACTGCATGTCAATTTTGATCAGCAGTCTGCACAAGGAA  
AATTCCTGGACAACAGAGACAGAGAGAGCTAGAGAGACCACAAGAAGAGGCTGGAGAATGTTGCTCACTGGAGTGG  
ACTGCACTGAGGTACCAATCAGTTTGTGTGATTGGCAATGAGCAGAGCAGCTGGGAGCTGGGGCAGGGCATATATCCCC  
CAACAGCAAAAGCCATGCATCTCTCCCTCCTCCGTCTCCTTTATATCATCACCATCACCATTGAGCAATTCCAATCCTCCTCAC  
AGATTCCCCTCACTTATATACTCCCTCCTTCTGATAGCTCCTCCTCACCATTCCAATCCATTGCAACAAAGCTCCTTCC  
AACAACAGCGGCACAAGCTTGCAGGCACACGTACGATCGAGCCAGCACAAGAAAAGCTTCTTCGTTCTTCTATCTCCTACC  
TGCTGGTCACTGGTG

>SsLRR-RLK142

ATTCTCCCATGGACCCACCACCACATCTCCACAAAAATTATATTGTTTTCATATATTTCCTTTTTTTGAGCGAGAAATT  
CAGAAAAGAACTAAATAAATTTGACTTTTTCTATATATATTTCATGCTGTTCTTTCTAGGACAAATTTTTGAGAAGTTTTATTC  
GGTGTATCCAAACGGCGCTTTTGGAAAAGAGGAAACATTGGAGCAGACAGTGTGCATTCCATTCTGTGGCATTTTCATTTTT  
GAAGGAATTGTTCTCTTGATGTGTTAAATAGCAGTAAAGAATTTGTGCCGAATGCCTACAGCTGCTCTAGCAAGTAGCACTA  
ATGGTGAAAGTGCCTAAATCTAATTTGAAAGTTCTTAATTTCCAGGTTGAGACTGAATAATGTTGATGATGTTGAGTCTCAG  
CCAAATCCAAGCTCAAAGCTTGCATAACAATTATCAGCAGGCGTACCGTATGCTTTTTACTCCATTAATCGAATATAATATA  
GTACAATAAACTAAAGTTCTAATTCGGTTACTAACTACTAAGCACTGCTGGCTGAACAGGAAAAAGATGCAGATTGGCGTA  
TGCACACATTGCAAAACAACTACTGGCAATAAAGCATGGCATCATTCAGGCCACTACTGAAGAAGCATCAGCAGCTGAGC  
GTGCAGTAGCGCTCACTGTTGTTCTTTTTTAATTGCTGCTACTTTCTGGTGCAGCCTAATACACTACGCTCCTCAAATAACT  
CACTGCTTGTGAGGGCTATAAAGAATTGATTTTAGGAGATGGAAGCGGCTTTACATTGTGACGATGCTGCTGATCCTCCT  
AAGTGTGAGCAATGATTGGGATTGGCATCCACTAGAGGCAGGCTTTGTCCTTGTTCCTCATGGAGATTGCAGGATTAGCAGC  
TGCACTGTGTTTGCTGCTTGCAAGTTGATCTGCAGTTTCAGCTGGACTGTGCTTTATGCCCTTCAGTAGTGTTCAGTTAACAC  
TTAACAGCAGGGGGGCGTGAGTCTGTGACTGATTGACTGTGAGTGTGCTCTCCACCACAACACAGTGTCTCCTCAATTCAG  
GTTTCAGCAGGAAATTAATATGCTGGATGCACAGATAATATACTAGCATGATGGTGTGCGTAATCTATCATTGACCACCGCTTC  
ATGTCAACTCTTAACAGAAACACTGATTTACTATGTCAACTCTGAACAGAAAGCTGACGACTGACATGGCTTGCCGGCCAGT  
ACATGTCAATCTCTTGACAGCAATTGGTGAACATAATATGGTTTACTGATCATATCTAAAAAAGCATGGTTCACTGATCATCTG  
CCTGGAAGTGTGAACGCATTGGGTTCACTAGTACTCGGCCGGGCGGGCTGGACTGAGTGCAGCCGGGCGAGGCTGTG  
TCAGCTGTGGGCTGAAGAGTGGGACGGCCATATGAGGCCCTGTCTCTCAGCTCTTGATTCTGAACGGCTAGTGGACAT  
GCTGGGCTTGACTGGGCCAGACCTGACCAACTGACTGACTGCATGTCAATTTTGACCAGCAGCACTGCACAAGGAAAAT  
CCTGGACAACACAAGAGACAGAGAGGCTAAAGAGACCACAAGAAGAGGCTGGAGAATGTTGCTCACTGGAGTGGACTG  
CACTGAGGTACCAATCAGTTTGTGTTTCGATTGGCAATGAGCAGAGCAGCTGGGAGCTGGGGCAGGGCATATATCCCCACAAC  
AGCAAAAGCCATGCATCTCTCCCTCCTCTGCTCCTTTATATCATCAACATCACCATTGAGCAATTCCAATCCTCCTCACAGAT  
TCCCACTCACTATATACTCCCTCCTCTGATAGCTCCTCCTCACCATTCCAATCCATTGCAACAAAGCTTTCCTTCA  
CAACAGCGGCACAAGCTTGCAGGCACACGTACGATCGAGCCAGCACAAGAAAAGCTTCTTCGTTCTTCTATCTCCTACCTG  
GTGGTCACTGGTGCT

>SsLRR-RLK158

GTTCTGAGCTGCTCCTGTGAATGGAACCTAGCGGTGCTCCTACCATTTCACGGGGCTCATGTTGACACAGAAAAAGAGCA  
GCACATCAATCCTCGATCCATCAGACATGTAGATACAAATCAGTATTCTCTGGTCTGTGACAAAAGTACTACCCTGTAG  
AGTAGACAGTACGTATTCTAACAAAGTTCAAATCACTTATCTGCTGTGTAATCTTTAGGTGCCATGTGTGCCAACAGAGGA

AGAGCTTATCTGACAGATCGTTCTGCAGCGGAGTGCTCATGTGGCCAAGAGAAGTTTCGATGGCCTTGGCCTACATACTGGG  
TCCGGTCCAGCAGCTTTCCGGTTTGTTCCGTTTGCTACGTCGAGGTCTTGTTTAGATTGAAAAGAGAGTGAAATTTGGCACGGT  
AGCATTTTCGTTTGGTTGATAATTATTGTTCAATCATGGCTAACTAGGCTCAAAAAGATTTCGTTCTCGTATAATAATCAAAAC  
TGTTGTAATTAGTTATTTTTTTATCTACATTTATTGTTCTATGCATGTGTCCCTAAATTCAATGTGACGAAGAGAGTGAAAAAACT  
TATAATCTAAACATGGCCCAAGTAGGCACTCACGGGGCTGAATCAGCAGATCTTTGACTCCAATATCAGCTGGAATTTTTGTT  
CCTACGTTCTTGCTCTATCTGTCAGATCCGATGATTGATCCAAATTTCTTGCAACCTCTGGATATAGGCCCTGTTCCGCAGG  
CTGTTTTTTTGGCTTATAAGCCGGCTGTGGCTGATTTGCTGTGAGAGAAAAAACTGTTCCACGGCTGATAAGCCCGTGCAT  
AAGCTCAGCCGAACAGGGTGATAGTTTCTGGCATGTCTGTTAACACCCGATCGACACATGGACTTGATGTTGCAACCTGAAG  
TTCTCGGCAGAATTGAAACGAGACGTTCTATCCGACTTGCTTCGTACTGCAGTCGATCGGATCATGCGGTCCGACGTATAGC  
ACCACTCAGAATTAAGTGGAGTTAACTCTAATCTAAATCTTCTACATGTATAAGCATGGTTCCCTTAGTCTCTTGTAATCTTACT  
ATCGTGGGCATCAGGGATTACAGGCATGCATGTTTGGATGTTTCTGATGTTTGTGACATGAGCTACGGGAGAAAAACACACAC  
GACACCCAAATCGCTAGATGCTTCCATGGATCGGCATCCAAGTTGGGGGTAAACACAGGTGGTCTGAAACGAACAACGAACC  
GCCTCAGGCTCGCGGAATATGATGGCGAGCACGAATATTTATGTATGGCACGTAAAAAACTGCTCCTGCAACCAAGATGC  
GATCCTGCGGTGCGATGGATGTTGTCGGGATTCCGGCTCTGGAAAGATTGGATGAGGCAGACGACACGACCTACGAGACAAACC  
AAGATCCTCCGATCCGTCTGTCGGCTCGGTGTACCTTCTTCATCCAGAATAAGTGGACGCGTCGAAAATATCACACAGCTAGG  
CAGAGGCAGGATTGAAAAGTACCTCTCGGCACGCCCACACCGACGTCGCGCACCCAGGCGTGCCTGCGTACCGGTACCCG  
CAATAGTACTGTACCGCGGCAAAAATGAGGGCGAGACCGAGAGAAAAACAGCGGAATCGAATCTCCGCTCCCGTCCG  
GTGGTACTGGTACCCGCCGCGCGCGATCCCGCTTCCGCGGGCGTGGGGTACCGGCGCACGGCCGAGGACCGAGGCCA  
AGCACGGGCGTCCGCGTCTGCTTTCTGGTGCGGGGTCAAGTGGCGGGCGCGCTCCACAGAATGCAAGAGATTCCGGCGCGC  
TCGTCGCGTGCCTAGGAGTACGTTTTTTCCCTCCGCTCTGTCATCCAGTCCGCTTGTGCTTGGCGCCCCCGCCGCTCTG  
GGCGGGACAAGAGGCTCTGCGCCACGTCGCGCACTACTTGATCCACTGGTCGCCCGCCCGCTCCCTCCCTCCACC  
TCTATAATCTACCCGCTCTGCGCC

>SsLRR-RLK295

CTGCACCTAAATAATATATGTGCTATTTTTGGAATCATGTACCAAAGAAATGCCTCAATAGGGAGGAAACCTGTATATTTT  
TTTTCAAAAAAATCAAACCGGACAGAAGAGCTGTCATTATATATATTAATAGGAAGTAAAGAAGAAGGGAAGTAATTA  
CCTGCTGTGTGGTTGCTATGATGATTGATGACTCCAGATGATTTGTGGCATGTGTCGTTCTAACAGTCCAATATCTCACTCT  
CAGATAGGGCATATAGGAACCTGTTGGAATTATGACTAGTTGACTATGCTGCCAAAACCTATATTAGTTGAGGAAACTCTTATTT  
GTGGGAATTTAGTAAAAATGATAAGAAATAGTAAATTTGATAGGTGAGGTGCAAACTCTGCCAAATCTGTACTCTCT  
GAGAAATTTGAGTTATTCATGAAAAGTGAATACGTACTTTTCATTATTTTAGTGAAATGATGGTTTACTTTCTTGATTTAGCC  
TTCTAAGTACACCTACAATTTAGTATTTATTTGACATGATAAGTAAAGAAATCAATCTCTAGATACTGAATGAGGATTCCAGCATG  
CATTATATTTGAAAATCCAGGTCAATACCACAAAAAAACAGTGCAGACAAGTTGTACGTTTTATGCAAGCAATGATAGAGTATA  
TGATACTCCGAGAATTAGTCAGTGGAGGTAGAACCACAAAAACATTTATTTAGCAAGATCAAAAGCTACCACCGATAATTAAT  
CTTTACCGTTTATCATTTTAGAATTCAGTCATGGGACAAAACATGTAGGTCAATTTCTCTTTTCTTGCTCAITCCGCCAAGA  
ACTGATACCAAAATTTGGATCAACTCCTCCCCCAATAACACTCTCTCTTTTACACAGGTCCCTCATAACGAGTGCCTTCTAGGT  
TTCACTAGCTAGCTAAGCAAGGAGCGGTTATCAGTGAGTGAAGAGCTTAGTCAATTTAGACACTGATGGTTCACTAAAATGTAAGTGCCA  
CCAAAGTATGCTCCCACTGAAATGCTTTGACCATCTTCTTTTATCCTTGTTGTTGGATTCCATCATCTGATCCCATTATACAT  
CTCTGGTGAGTGCTCTGCCTTTTACCCCGGTTAACTTGGTGGAGGTGAATGTGTGGTGTGGCTTCCATGAGGCAATCTATT  
GCATTTCTGGTGTTTGTGGTGAATGAAGCAACAGAACAGGATGAGGAAGTGAAGGTGGTAGCTGGTAGGTCATCTCGT  
CTCTCAACATGTTTGCATAGGAAACCAACTTGGGGCTTTGGGGTGTCCAAATCAGCTACCAATTTGTACACATAGTTGTGGC  
CACCTGTCTATGTGGGGCTGCGGTAGGCGCATGTGTCCAGCGCTGGTGGCTGAGTCAAGCTTGCTGTCTGAATCTGAGGAGT  
GCATGGTGACCCAGCTAGCGCATGGTGGCTGAGTCCAGCCGAGGTTTAGTTAGTGAATGGTTAGCAGGGTTAGCAGTGA  
ATGGCTAGCAGTGAGTGAAGGAGCGGTTATCAGTGAGTGAAGAGCTTAGTCAATTTGCAATAGTACGCTAGGCTATTGTA  
GCCAATTGGCATCTCTGGATGGGGAAGCAATGAAGAACAATTAGTCTTAATCTCATCTCCTTCAACAACAGGGCGCTCAGAG  
GTAAAACCTTCTCTCAACCTATGGATCGAGGCTATGAGCTGCATAGCCTAGCCTCGATCCAGCTACCTTAGGCCCCAACGC  
CCATGACACCACTGCTATTTTGGGCTTACATTAGCCTAGTCCAAAAAAGATGAATAGAAGTGTGGAAGTTTTTTTTGTCACT  
TCAACGCATCTAATACAGTATCACCAAGAAATTGGATGGTTAATGCATTATAACCCCTACTTTATGTCTTGTTTTCCATTTTCAGG  
TGCTCTGAATCTGTCAAGACATTCAGGACAGTACAAGAACCCCATGTGATCCATTTCTTCAGAGAATCTGCCAACACCATCT  
GCTTGC

>SsLRR-RLK286

CTCAACAGGGAGGAAACCTGTATATTTTTTTTCAAAAAAATCAAACCGGGCAGAAAGAGCTGTCATTATATATATT  
AATAGGAAGTAAAGAAGAAGGAAAGTAATTAACCTGCTGTGTGGTTGCATGATATGAACGATTGTGATGACTCCAGATGAT  
TTTCTGGCATGTGCTGTTCTAACAGTCCAATATCTCACTCTCAGATAGGGCATATAGGAACCTGTTGGAATTGACTAGTTGA  
CTATGCTGCCAAAACCTATATTAGTTTCAGGAACTCTTATTGTTGGGAATTTAGTAAAATGAAATGTAAAGAAATAGTAAATTT  
GATAGGTGAGGTGCAAACTCTTCCCAAATCTGTACTCTCTGAGAAATTTGAGTTATTCATGAAAAGTGAATACGTACTTTTC  
ATTATTTTAGTGAAATGATGGTTTACTTTCTTGGTTTAGCCTCTAAGTATACCTACAATTTAGTATTTATTTGACATGATAAGT  
AAGAATCAATCTCTAGATACTGAATGAGGATTCAGTATGAGTGAATTTGAAAACCAACGCTACACCAACCAAAAGCTGC  
AGACAAGTTGTACGTTTTATGCAGCAATGATAGAGTACATGATACTCTGGAGAATTAGTCAGTGGAGGTAGAACCCAAAAA  
TATTTCTTTAGCAAGATCAAAAGCTACCACCGATAATTATCTTTACCGTTTATCATTTTAGAATTCAGTCATGGGACAAAAACA  
TGTTAGGTCAATTTCTCTTTCTTGGCCATTCTGCCAAGAAGTATACCAAAAATTTGGATCAACTCCTTCCCAATAACACTCT  
CTCTTTTACAGATGCCCTCATAACGTGTGCTTCTAGGTTTCACTGATTTTCCAGCTAAGCACCATGATTTTGGGCCATTTTA  
GATGTTAGACACTGATGGTTCATAAAATAGTAAGTGCCACTAGAGTATGCTCCCACTGAAATTGCTTTGACCATCTCTTTTT  
ATCCTTGTGTGTGGATTCCATCATCTGATCCCATATACATCTCTGGTGAGTGCTCTGCCTTTTCGCCCCCGGTTAACTTGGTG  
GAGGTGAATGTGTGATGTGTGGTGTGGTGTGGCTTCCATGAGGCAATCTATTGCATTTCTCGGTGTTTGTGGTGAA  
ATGAAGGCAACAGAACAGGGTAGAGGAAGTGAAGGTGGTAGCTGGCAGGTATCGTCTCTCAACATGTTTGCATAGGAAA  
CCAACTTGGGGCTTTGGGGTGTCCAAATCAGTACCAATTTGTACACATAGTTGTGGCCACCTGTCTATGTGGGGCTGCCGT  
AGGCGCATGTGTCCAGCGCTGGTGGCTGAGTCAAGCTTGTCTGAATCTGAGGAGTGCATGGTGACCACGTCCAGCGC  
ATGGTGTGAGTCCAGCCGGAGGTTAGTTAGTGAATGGTTAGCAGGGTTAGCAGTGAATGGCTAGCAGTGAATGGGAGG  
CGGTAGCAGTGAGTGAAAGAGCTTAGTCATTGCAATAGCTAGCCGTGAGGCTATTAAAGCCAATTGGCATCTCTGATGGGG  
GAAGCAATGAAGAACAATTAGTCTTAATCTCATCCCTTCAACAACAGGGCGCTAAGAGGTAAAAACAACAGGGCGCTGAG  
AGGTAAAACCTTGCCCCAACCTATGGATCGAGGTATGAGCCGATAGCCTAGACTCGATCCAGCAACCTACGACCTAGGCCCCAAC  
GCCCATGGCACCACTATGCAGTTTTTGGAGCTTACATTAGCCTAGTCCAAAAAAGATGAATAGAAGTGTGGAAGTTTTTTTT  
TTGTCACTTCAACGCATCTAATACAGTATCACCAAGAAATTGGATGGTTAATGCATTATAACCCCTACTTTATGTCTTGTTTTCCA  
TTTTCAGGTGCTCTGAATCTGTCAAGACATTCAGGACAGTACAAGAACCCCATGTGATCCATTTCTTCAGAGAATCTGCCAA  
CACCATCTGCTT

>SsLRR-RLK287

GCCTCAACAGGGAGGAAACCTGTATATTTTTTTTCAAAAAAATCAAACCGGGCAGAAAGAGCTGTCATTATATATATTAAT  
AGGAAGTAAAGAAGAAGGAAAGTAATTAACCTGCTGTGTGGTTGCATGATATGAACGATTGTGATGACTCCAGATGATTTT  
CTGGCATGTGTGCTTCTAACAGTCCAATATCTCACTCTCAGATAGGGCATATAGGAACCTGTTGGAATTATGACTAGTTGACTA  
TGCTGCCAAAACCTATATTAGTTTCAGGAACTCTTATTTGTGGGAATTTTAGTAAAATGAAATGTAAAGAAATAGTAAATTTGAT  
AGGTGAGGTGCAAACTCTTCCCAAATCTGTACTCTCTGAGAAATTTGAGTTATTATGAAAAGTGAATACGTACTTTTCATT

ATTTTATGTAAGTATGATGGTTACTTTCTTGATTAGCCTTCTAAGTACACCTACAATTTAGTATTTATTTGACATGATAAGTAA  
GAATCAATCTCTAGATACTGAATGAGGATTCCAGCATGCATTATATTTGAAAACACGGTCAATACCACAAAAAAGCTGCAG  
ACAAGTTGTACAGTTTTATGCAAGCAATGATAGAGTACATGATATCTGGAGAATTAGTCAAGTGGAGGTAGAACCCCAAAATA  
TTTCTTTAGCAAGATCAAAGCTACCACCGATAATTATCTTTACCGTTTATCATTTTAGAATTCAGTCATGGGACAAAACATG  
TTAGGTCAATTTCTTCTTTCTTGGCCATTCTGCCAAGAACTGATACCAAAATTTGGATCAACTCTTCCCAATAACACTCTCT  
CTTTTACACAGATCCCTCATAACGTGTCGCTTCTAGGTTTCTACTAGTTATCCAGCTAAGCACCATGATTTTGGGCCATTTTGA  
TGTTAGACACTGATGGTTTCACTAAAATAGTAAGTGCCACCAAAAGTATGCTCCCACTGAAATTTGCTTTGACCATCTCTTTTAT  
CCTTGTGTGTGGATTCCATCATCTGATCCCATATACATCTCTGGTGAGTGCTCTGCCTTTTCGCCCCCGGTTAACTTGGTGGA  
GGTGAATGTGTGATGTGTGGTGTGTGGTGTGGCTTCCATGAGGCAATCTATTGCATTTCTGGTGTTTGTGGTGAAATGAA  
GGCAACAGAACAGGGTAGAGGAAGTGGAAGGTGGTAGCTGGCAGGTCATCGTCTCTCAACATGTTTGCATAGGAAACCAA  
CTTGGGGCCTTTGGGGTGTCCAAATCAGCTACCAATTTGTACACATAGTTGTGGCCACCTGTCTATGTGGGGCTGCCGTAGGC  
GCATGTGTCCAGCGCTGGTGGCTGAGTCAAGCTTGCTGTCTGAATCTGAGGAGTGCATGGTGACCACGTCCAGCGCATGG  
TGGCTGAGTCCAGCCGAGGTTTGTAGTGAATGGTTAGCAGGTTAGCAGTGAATGGCTAGCAGTGAAGGGGCGG  
TTAGCAGTGAGTGAAAGAGCTTAGTCATTGCAATAGCTAGCCGTGAGGCTATTAAAGCCAATTAGCATCTCTAGATGGGGGA  
AGCAATGAAGAATAATTAGTCTTAATCTCATCCCTTCAACAACAGGGCGCTAAGAGGTAAAAACAACAGGGCGCTGAGAG  
GTAAAACTTGGCCCAACCTACGGATCGAGGCTATGAGCCGCATAGCCTAGACTCGATCCAGCAACCTTAGGGCCCAACGC  
CTATGGCACCACTTAGTGAGGCTTACATTAGCTTGCAGAAAAAAGATGAATAGAAGTGTGAAGTGTGAAGTGTGAAGTGT  
TCACTTCAACGCATCTAATACAGTATCACCAAGAAATGGATGGTTAATGCATTATAACCTACTTTATGTCTTGTTTTCCATTT  
TCAGGTGCTCTGAATCTGTCAAGACATTAGGACAGTACAAGAACCCCATGTGATCCATTTCTCAGAGAATCTGCCAACAC  
CATCTGCTTGCCA

>SsLRR-RLK303

TCTATTTATTTCTTTTCTTTGCGGGCTTTAAATTAGTTGAAATAATCTGATCTGATTGAACAAATATACTGTACATGATCA  
TTGAATGAAGATAATAGCTATGTGTCTGCACCTAAAAATTAATATATGTGCTATTTTGGAAATCATGTCACCAAGAAATGCCT  
CAATAGGGAGGAACCTGTATATTTTTCAAAAAATAATCAAAACCGGCGAGAAGAGCTGTCAATATATATTAATAGGA  
AGTAAAGAAGAAGAGGAAGTAATTAACCTGCTGTGTGGTGCATGATGAACGATTGTGATGACTCCAGATGATTTTCTGG  
CATGTGTCTTCTAACAGTCCAAATATCTCACTCTCAGATAGGGCATATACGAACCTGTTGGAATTATGACTAGTTGACTATGCT  
TGCAAACTATATTAGTTCAGGAACTCTTATTTGTGGGAATTTAGTAAATGAAATGTAAAGGAATGAATTAATTTGATAGG  
TGAGGTGATGGTTCTCCCAATCTGTACTCTCTGAGTTTGTAGTTATTCATGAAAAGTGAATCACTGATCTTTTATTTATTT  
TTAGTGAATGATGGTTTACTTACTTGATTTAGCCTTCTAAGTACACCTACAATTTAGTATTTATTTGACATGATAAGTAAGAAT  
CAATCTCTAGATACCTGGATGAGGATTCCAGCATGCATTATTTGAAAACACCGTCAATACCACAAAAAAGCTGCAGACAA  
CTTGTGCACCTTTATGTCAGCAATGATAGAGTACATGATACCTCTGGAGAATTAGTCAAGTGGAGGTAGAACCAAAACATTTAT  
TTAGCAAGATCAAAAGCTACCACCGATAATTATCTTTACCGTTTATCATTTTAGAATTCAGTCATGGGACAAAACATGTTAGG  
TCAATTTCTTCTTTCTTGGCCATTCTGCCGAGAACTGATACCAAAATTTGGATCAACTCTCTCCCAATAACACTCTCTCTTTT  
ACACAGATCCCTCATAACGTGTCTGCTTCTAGGTTTCTACTAGTTATCCAGCTAAGCACCATGATTTTGGGCCATTTTAGATGTTA  
GACACTGATGGTTCACTAAAATAGTAAGTGCCACCAAGTATGCTCCCACTGAAATTTGCTTTGACCATCTCTTTTATCTCT  
GTGCGTGGATTCCATCATCTGATCCCATATACATCTCTGGTGAGTGCTCTGCCTTTTCGCCCCCAGTTAACTTGGTGGAGGTG  
AATGTGCGGTGTGTGGTGTGGTGTGGCTTCCATGAGGCAATCTATTGCATTTCTGGTGTGTTGTGGTGAATGAAGGCAACA  
GAACAGAGGTAGAGGAAGTAGAAGGTGGTAGCTGGCAGGTCATCTGCTCTCAACATGTTTGCATAGGAACCAAACTTGGGGC  
CTTTGGGGTGTCCAAATCAGCTACCAATTTGTACACATAGTTGTGGCCACCTGTCATGTGGGGCTGCCGTAGGCGCATGTGTC  
CAGCGCTGGTGGCTGAGTCAAGCTTGCTGTCTGAATCTGAGGAGTGCATGGTGACCACGTCCAGCGCATGGTGGCTGAGT  
CCAGCCGGAGGTTTAGTTAGTGAATGGTTAGCAGGTTAGCAGTGAATGGCTAGCAGTGAAGGAGCGGTTAGCAGTG  
AGTGAAGAGCTTAGTCAATATCTAGCCGTGAGGCTATTTAAGCCAATTGGCATCTCTGATGGGGGAGAAAGCAATGA  
GAACAATTAGTCTTAATCTCATCCCTTCAACAACAGGGCGATGAGAGGTAAAACCTTGCCCCATCTTATGGATCGAGGCTA  
TGAGCCGCATAGCCTAGACTCGATCCAGCTACCTAGGGCCCAACGCCCATGGCACCACTATGCAGTTTGTAGGCTTACG  
TTAGCCTAGTCCAAAAAGATGAATAGAAGTGTGAAGCTTTTTTTTGGTCACTTCAACGCATCTAATACAGTATCACCAAGA  
AATTGGA

>SsLRR-RLK401

CCAGGGGGAGGAGAAATCATTATCAGAGGAAGCCAGAAAAAGTTAGGGTTTAGGAAGTTCTCTCCCGCAGAGAATTAGAAGT  
AGCTACTCCATTGTTCTTCAAGTCTTATAGGTTTGATTAGATAGAATTAGAGAAGTAGAGCATTCAGCTCTGGATTTTCGGATC  
TTCATCAATAAAGATTGGTATTATTTCAATCATCTCTACTACTTTATTCTAATTGCATTATGTCTCTGTTTACTATGTTCTTAGT  
TTACTCTAGTTCTATAATTGATATAGTTATGATTGATAATGAGTTTATGTATGAGTTTGCAAAGCGCTTAGCTCTTACCTCGAGG  
GAGTTAAGGTGTAGATCATATGTGGGCGTGGTGTCTAGATATTTTACCTGCAAAATGTATCTTATTGGCCGGTGTGTGGTA  
GTTTCGCGATAGTGACAGCTTCTGTTGATTCTTATATAGTCCACCTCCGTTGATAGGACAGGCAGAATTTGTATTGCGGAGTAA  
GTCTTACTATGTTCTGATTACTTTAGCAATGTTCTTATACATAAATAAGAGTCTTTTATGCTATATATGATCTTGTAAGATGT  
TTAGAGTAGATTGTGACTTAGTAGATAGTAGATACTTAGAATCCATCTCTAGCTAATCCGACGTCACCTTATATCAATATGAGG  
TAGCTATTTCTAATCGTGTGTTATTACCCATGAGCTTATTAATCATTTATCTTTATTTATGGCTTACCCCTGCCAAAGCAATG  
GACTGTGTGACGAGTTTCTCATTAGTAATCATGTTTAGCAAAGTTGATCTCTAGTCTATGTCATTCTACACCTGCTTTACCGT  
TCTCTTAAAGCAAAATATAAATAACGATACCCGGAATACTTTTCTGGTGAATGCTACAATGAGGTATTTATCTGTGCGTTTG  
CGGATAGAATAGATTATCTTCTAAAGAGCCCTTACATTTATAAATACCTATGTACACTCTGGCACCATGTGGGGATGACAAC  
CTAGTATTTAAGTGGTGTAGTAAGTGTCAACACCGTCCATTTAAGGGGACCACCTTAAAAAATTTATCTTTGTGTCACAAAT  
GATTATAGAGATGATAAGATAAACTTATGCTTCTGAAAAATAAAAGTCAACGCTTATTAATCATGTTTATATAATAGTGTA  
ATTGAGAGTGTGTTGATATGCATATGCATATCATCGTATGAGGAACCTGATTGAGTACTTATTGAGGCGATGTTTGAATGCGCG  
AAATCTTGCTTATTTCTACAATTTTCTATGTGTAATTAATTTGGTTTACGAAATACTCCCTCCGTCCAGGAAAAACATGCAATT  
CTAGCACAGTATCATATTTTAGTATCTTAACTTTGACCAATTATAGATAGAAAAATATTAATTTTATGATATCAATAAATATCAT  
TAGTTTAATTATGAAATATAITTTCAATAAATGATTGAGGCCATAAATATGAATACTATTCACTATAAACTTGGTCAAATGT  
GAACTACTTTTTCTGGTACGCAACCCATAGTTACATGTTTTCCGGACGGAGGAAGTACATATACTGTTCCCGTAAAAATCTCT  
GGTGCAAAACCGTGGCCAAAGTGGCCAAGTACGATTCAAAATGTCTACGTGACTTGCATAGTTACCAATGTTGGTGCACCGAC  
AGTAATCAACAATGTCTGAAGTCCGAAGGAACGAAAAGAAAGAGCAACGGGACTATGAGTGCACCTGAGATTGTTTATTTCT  
TACTCGATTATTAACAGGATTAATCTTTTATTAACACTAACCGAGGTGGGAGCTATGGGCTATGGCTATGGGAAATTTGGGAAT  
TCGATTCGATTACTCTGAGTGCGCCACTATTGTGCATCACTGGACCCGACAGTAGACGGAGACCGTTGACGCTGGCCA  
ACGACTCGCCGACCCCTTTACACGTAGTATAACAGCCGCGCACGCACTCGCACTGTGCGACAACA

>SsLRR-RLK400

GCAGGATCATAATCTTTGGGATGATCACCTGCTCCGAAGGTGCATGCCGACCGAACCTACCGACGCATACCTCAAAATACATG  
GGATCTATCTTTTATAAGCACATTTGAAAGACTAGACTCGATTAATAGATAGTGAGATTAATCAAGTTATTATAGACCGGATGG  
GCAAGTTATCCGCTACCAAAAGAATAATGTTGTTAAATCTTTTATAAACCACAAAAATGCACGTGATCCATGCCTAAATCTAA  
CCAGCTGAGTTATGCTCAGTTTCAACAACATAAATCATATATATGATAAATATATACTCCCTCCGTATCGGATTTAGAAGTCTGT  
TAGACAGTGACACCGGTTCCTCAAAACCAACTTTGACCTCTTGTCTTTTATAAAAAATATTATGAAAAAGTGATATATGATA  
CTTTTATGAAAGTATTTTCAAGACAAATCTATTATATAATTTTACATTTGCAAACTCAACAACCTTAAAGGTTATTGATGATT  
TATATTTCCCAATGTTTGAACCAAACTTTGTCCAAAACGACTTCTAAATATGATACGGAGGGAGTATGTCATTATCAAAAGAAC  
AATAAACTATTGTCAATGGATGACCTTAATTAACAACCTGATTAATCATTGCTGATAGTTCCACATATGTTCTGTGAGGCACAAA

ATGTTCTATTTTGGAAAACATGGAGTTAAATAGTTCACCAAAGACGTGGACACTTCTTGTTCCTCTTTTCCCTTTAAAAAT  
GCCTCAAGATAAGGTGATGACATGAGGAGCTGTTCCACTGCTTACGCATGCATCCGATGGGATGTACTCTCTTCAGGTTAGTA  
AAAGAAAGTCGTTTTAGACAACGATATGGTCTACAAAAGCATAAAGTTGACTTTTATTTTTCTGTAAAAAATTTGTTTAAAGTG  
ATATATGTATACTTTTATGAAAGTATATTTCAAGACAAATTTATTCATATGGTTTTTCATATTTCCAAACTCAATAATTTAAAGTT  
ATTCATGATTTATATTTCCAATGTTTGACCCAAATTTTATCCAAAACAACCTCTTTTACCAACATGGAGGGAGTACACTTTTAC  
CAACATGGAGGGAGTACATAGCATAAGAGAGCATGTTTACATGGCAACAAGGATGTCACAAAGACACAAACTCACAATAA  
CTTTAGGAAAAATCCATCTAGCTCCAGCATGTGGGAAATCCTCCTCCCTGTTTGGATTTCGAGCTAAAAATGTTGTATGCTCGAGCC  
TTTTTACAGTACTAACAAAGTACTACATAGCATAAGAGAGCATGTTGTATACCGTAGCGTACTGTAGTGTACTGTAGCATT  
TTGTTTGTATTTGGTAATAATATCCAACCGTTGACTAATTAGGCTCAAAACGTTTCGTCTCACAAAGTACAACCAAACTGTGC  
AATTATTTTTTATTTCACTACATTTAGTACTCCATGCATGTATCGCAAGTTTAAATTTGACGGAAAAATTTCTTTTGTATAGTG  
CATTTTTTAGGAGTTTTGGAGAACTAAACAATGCGCCCAAAAAGAAAGAGCAACTGGACTACTGAACTATGGAGTCATTG  
AGATTAGTTTATTTGTACTCAGTTATTACAGGGTTATTTTTGTGAAACACTAACCGAGGTAGGAGCTATGTCATGGGGAAGT  
GATTTACAAAAACAGACAGACGGAACAGACTTGATTACCTGAGTGCGCCACTAACTATGCATCGCTGGGCCACCGAAAAAG  
TAGCCGGAGACCGTTGACGCTGACCAACGACTCGCACACCCCTTTTACACGTAAGTATAATAGCCGGCAGGCACCTCGCA  
CACCAGCCGTCACTCCCGTGGCCTCACTCCCATAGTCCCATTTCTTCCCCGTCTCTACTCCTCATCTCAGCTGCTCTGCTCG  
GCAGCTCAGCTCAGCTCACCTCACCTCCTCACATCACAGCACAGCCGAGGAAGCTTCCAAGAAGGAAAAAAAAAAGAAC  
AA

>SsLRR-RLK434

ATATGGATTGTCGGGTACCAGCAAAACAGGGTACCCCATTTTCATCGCAAAACCACCCACCAAGACAAATATGACGGCTCAC  
GACCCATCACAGCCAGCCAGACCTTACTCCACTCAAACCAAGCCAAAGGACAAGCGCCGAGTCCCCAACGCTCCCTCT  
GCTTCGTCGGACCCCTCTCTGTCTTGTTCGACCTCCATGCTGCATCTAGGCGTCCGAGCCCTGTGACATCAAGGCGCTC  
GACCCCTTTGCACAGCTACTGCTTCGCTCGACCCCTTACTGTAACACACTATCACGGGCACGCACGGGCCCTACCGTTTTCT  
CTGTAAGGAAACAGGAGCCCGCCGCTCGTGCAGGATGCTTGGGAACTTGTAACACCTGATTTCATGATCCGGTCAAGGCT  
TCCACGGTTCTTTCTCGCCCCACGGCAGTAATAGGGAGGAGAGCCCTCGACAAGTGACGTTGGACAACCCCTACCACCTCAACGCG  
ACAGGGAGCAACGGCCGTCCAGGCCCCACCTTTTCGCCGGCGCAGCTTCAGGGCCACGAAATCTTCTTCATTATGACAC  
CGTGTACAGGTATGGCCTCGCCGCATCAACTGTGATACATCTACAGCCATGGCATGCAACCACCATGACGACGACTGTGCGA  
ATGTACGAACTGAGAGGAAAGCTAGGAATAGGGAGCCTTAGGGTCTTTTCTTTCTATTTTCGTACATCCAGATACTGTAAC  
CCGACTTTCTCCTTTTGCATACTATAAAGGGGAGGGAGAGAGCCCTCGACAAGTGACGTTGGACAACCCCAACCCAGCGCAA  
TGTAAGCAACACTCAAACTCGAATACACCCACATACAGAGACCTGAGAGCTATCCCTCTCTCGACCAGCTTGATC  
CCCCCTACTACAAGCACTTCGGTGCAAAAGCAACAGAGTAGCAGCGAACACTGGAAGTAGGGAGCTTCAGCCCGAACCCAG  
TATAAATCTTGTGTCCGCTTGACATCATCGGAGGCTCCGACGCGCAGCATCATTCACTTGTCTCGTCTAGACACCCCTCT  
GTTCTAGAACACCAACACGGATGTTGCATATGTTGTAAGTGGATTTTATCTGGTACTGCATATGTTTTCATACATATGATGCAA  
GTGTTTTATCTAGATGTTGTGTATGTTTATAATAGTTTCAAGTGTTTTCTGGTGTTTTTGCAAATGATATACGATGTTTCAA  
ATGTTTTATTTGTTTTAGACGAATATGCAATTGTTGCATGTTGATGTTTTAAACTAGATTGAGCGTTGCATCTCCTCCTCGC  
CTTCTCGCTCTCACTCTCACTGTGTAGACATGGAAGGCTAAAGTGGTCCCCCACTGGCACGGGACGGGCCCACTGCTTTC  
CGGGCAAGTGACAGAGGTGAGACGTGGACGAGCACGCCCAAAATTCATTGGCTGCAACCGTGCCCAAGAGCTGCCGAGTAT  
GATTGAAAATGTCACGTGACTTGCAATAGTTACCAATGCCTGTGTACCCATAGTCATCAACACTATCTGAAGTCCGAAGGAAC  
GAAAAGAAAGAGCAACTGCACATAGTACTCAACTATGGAGTATGAGATTAGTTTATTTGTACTGATTATATAGGGTTATTT  
TTTTATGAAACACTAACCGAGGTAGGAGCTATGACTATGGGAACTGGATTCTAACAGAAGAGACAGACAGAACAAACTTGA  
TTAGCATCCATCACCTGAGTGCGCCACTAATTATGCATCCCTGGGCCACCTAGCCGAGAGCCGTTGACGCTGACCAACGAC  
TCGCCACCCCTTTTACACGTATAACAGCCACGCACGCGCTCGCACACCAGCCGTCACTCCCGTGGCCTCACTCCCGTCTTCC  
CCGCTCTACTCATCTCAGCTGCTCTGCTCGGAGCTCACCTCACCTCCTCACATCACAGCACAGCCGAGGAAGCT  
TCCAAGAAGGAAAAAAAAAAGAACAAA

>SsLRR-RLK199

TTGTAATAAGGTTTAAATCATGGATTAATTAGAAATCATATCCACTAAATACAATATAAATAGTTTCAAAAGCCAACTGATA  
ATTCAAATATATTCATATAGAGCACTAGAGACTTACAATGTTATCTTGCTGATGAGTTTATTCGACGCGTTTGAAGGGACATAA  
ATGCTCAATATATGTCATCTTCATCAACTTCAAAGAAAATATCTCGCTCAATGAAAGTGACGAGACAATATCCAGAAGACTA  
TCTCCCATCTTGTTTCGGGTTTTTGTTCCTACTAAACCAATGCGAGAAAATACCCTTTCAACACTTGCTGTTGCCACAGGTAG  
AAGCAGCACCAATTTGAGAAGCTCATAAACCATATCATACACTTTATGCTCTCTCGTTTGAACAAGCTTAACTGAGAGATCAA  
CAATATTTCTAGACCTTTGAATCTATCATCTCTGCTTGATGTCATCAATATAATTATCTAGCTGCAATTCAGTCTGCGCAAATT  
ATTTTGTGAAAGTCTCTTTGGGTAGAACTCAGTACTGCTCGGTAGCTTCTGCGCATCAAAGAGCTCAACAGGATTAGAAGGA  
TTGAATGCCACCATACAAGACAACAACCTCATATTTGATCTCATAAACCGATTATTAAGTTCTTGACTATTTGATTAATGACA  
CCAATATATACTTCTCTTCTGAAAGTGATCATCATTGGTTTGTCTTCGAGCAGGAGCTTTCTCTGTTGATTTTCCATAAGGAACA  
TAAACACCATCCATAGCAGGAACATCAACACCATGTTTATCACAAAATGAGGTGACCTTCTCAAGAAAAGTATTTCAACCAT  
CAGACCTCAATTGTTGCATCTTTTCTTTGCCACATTAACAGTGATATTGCATTGAGAATATCTTGCTCCCTCTTTTGTAGAC  
ACTCAGATCACTATGACTCTATGAGCTTCTTGAAGACTCAAGTTCGGCAAAATCCCTGAGATTAAACGAACTACACAGCTAC  
TCATTGTCAATGGAACCGTGCCTACCACTCTATGGATGCATAAGGCCATTAATCCTTAGAAAATTTGTTCTCACAAAGAGT  
CAGAACCTAGGACCTGAGTCTACTACTAAGACTCTTGGTTGTCTTGTGTGAACATGTTGATTTTTTGTCTCTTCCCTTAT  
CAACTTATAAGACTAGGGAAGTGCTAATCATAGCCGTTCACTGGACAAAATAGCAGCGGATGAACCCGTGACTTTTCTTTT  
TCAAAAAAATATTTTATAACTTTATGTTTTTGGAAAATTAACAAATTACATTATATTTTGTGTATAACATTTATGGTAATAA  
ACCTTATCCATAATTTCTTAGCAAGCTCATAACTTTTGTGTATATAACATATTGTGAACAAAACCTATTACCACATTTTTTAT  
CATAGCTTTTTCAATACGTTTTTACGTAATTTTATACACAGTTTATCATGACAACCTTTTCTGCATGATTTTATACTCAATATTGT  
TCATGACTATTAGCGAACAATTTATCATAATAATTTTTTAACATAATTTTTGTATAATAAATTGTACGAATAACATAGCTTATAC  
ACATGTTTATATTGTCTAACAAATTTTTTGACATAACTTGTTCACAAACAACTTCTAAATCTTAAAAAATATTCTTGTATATAAA  
AAGCAGAATTGATAGGTTAATATGAAAAATTTAAATGAAATGAAAGAAAAAGGAAAGTGGAACTACATAGAGGCAGAG  
AGCGCCGAGGGGGGGAAGAAAAAGGAAAAAATGAACGATCGCCGTACTGGATTGGGTACGGAAGTAGACTTGACC  
GATGACCCAGCCAGGTCATTAATCCAGACGGAGCTAACACGGCAAGGCAAGCTACACATACCATTCCAGGCTACTGCA  
CATCACATTCGTCTGTCAACATTGAAGTCTCAAGTACAACGACACACTGCTACACGCTTCTCCAGTTCAATTCACAGTGGC

>SsLRR-RLK227

GTGCTACGGGAAACTCATTGTAGGTAGTACAATTTGGCATCGTCTAGCGCCTGTACGTAGCAGATGGAGCTTGGTCGCTAC  
ATGGCGGCCTTGGGCCTAGACTCGAAACTGGATCTGCATCCGAGGTTCCAGACGTATCGTGGTTGTCTCAGCGCGGTATGC  
GGGAGCACAGGTCTTGGCAGCGAGCGTCATTTTGAACAACACTATAAAAAAGTGAGTTTTTTTAGGAGTTCTTCTCTATAA  
TAACCGTTAGATCTTTCCAATTTCAAATCTAAAAGGAATCTAATTGCAATAGAGAAGGATGTATCTATAATATGCACCTTTCA  
CGGAAGCTTTGGCGTGGGAGTTACGCTGTGACTTGAGTTTGGAAATCCTATGCATCTGACATATTATGGCATGCA  
TGACGTAACAAGGAGAAAAAGTATTGGAGTCCGAATTCATATGGTGCATCTCATGTTTGCATATGAGCCTGATTGGCCAA  
ACAGAAAAAGGAGGTGAACAGTTGAAGGTGAATTTCTATTATGTTGGACTTTTTTTCTCAATAGGAATTCAGTTTTCGTTG  
CTGTTTGTATCCTTCTTTCCATCTTTTTTTCGGCATGTTTTTCCAGAGTCCCAATCAAGAGTCCCAATCGAGCACTCATGA  
ACCAATCCGATTCTTTTCTTATGTATCACGCTAGGAGTCTTACATCTTACGATCTTGGATGATGGATGACTCATATAGCATGAC  
GTCTAGATCGAACAGTTATTATAGAGAGAGAGCCCTAAAAAACTCGCTCTTTTATAGTATGATAATGATGATTGGAGTGCT  
AGAACAACCTTCTCGATAGCGTGGGTTCCATCGTTTATCTGTACAAATAGATCCAATTGCAAGATATTTTACCACCTATTTTGC



CTATTTTCCCTCATATTTTCAAATAAGAAAACATATAAATATCTCCTGTATCCATGCAAAATAGTAAGGCGATGGCAATGTCT  
CGGTGTGCATTTTGTGATTTTTTAGTTATACAGTACAAGACAGACGCTTACAATGCACACAAACTCACATCTAGACACACG  
TACGCAAACTCATCACTGTGAGCTTTTTCGAAGACTAGGTCAGCAAAATCCCTGAGATTAAACGAAGTACCACAGACATCTC  
GTTGTCAACGGAAACGCCGCTACCACTCACTGGATGCATAAGGCCATTAAATCCTTAGAAAAATTTGTTCTCACAAAGAGTC  
GAACCTAGGACCTGAGTCTACTACTAAGACTCTTGGTTGTTCTTGTGCAACATGTTGATTTTTTGTCTCTTCTCTATCAA  
CTTATAAGACTAGGGAAGCGCTAATCATAGCCGTTCACTGGACAAAATAGCAGCGGATGAACCCGTGACTTTTCCTTTTCA  
AAAAAATATTTTTCATAACTTTATGTTTTTGAAAAATTACAAAATTACATTCATATTTTTTGTGTATAACATTTTACGTAATAAC  
CTTATCCATCATTTCTTAGCAAGCTCATAACTTTTGTGTATATATAACATATTGTGAAACAAAACCTATTACCACATTTTTATCA  
TAGCTTTTTCAATACGTTTTTACGTAATTTTATACACAGTTTATCATGACAACCTTTTCTGCATGATTTTATAACTCAATTTTGTTC  
ATAACTATTAGCGAACAAATTTATCATAATAATTTTTTACATAATTTCTGTATAATAAATTGTATGAATAACATAGCTTATACAC  
ATGTTTATATTGTCTAACAAATTTTTTGACATAACTTGTTCACAAACAACTTCTAAATCTTAAAAAATATTCTTGTATATAAAAG  
CAAAATTGATGGTTAATATGAAAAAATTAATGAAATGAAAGAAAAGAAAAAGTGGAACTACATAGAGGCAGAGAGC  
GCCGGAGGGGGGAGAAAAAGGAAAAAAAAAAGAACGATCGCGTACTGGATTTGCGAACAGAAGTAGACTTGACC

>SsLRR-RLK6

GAAGCGAAGAAAGATGAAATGGAATCGATAATACCAATAATATTTTGGGATCTAGAATAAATTCCTAAGGAGCCAAAACAGT  
AGGCCGTAATGGGTCTACAAGACAAAAATGTGACTCCAAAGGAAATATGTAAAGATGTGGAGCGCGACTTGAATCAAAAGTT  
TTGCGCGAAGCGAATGATAGATTACAATGAGTGCATGGCCACATCATGATCTGATTACATCAGATGAAAGTCAAGACAAAC  
ATTTCCCAATGGGATTTGTATGAAAATAATTACGTGGCACAACCCAGAGGTTTTGTCATGAAAAGAAAATGTAAGGGATGCC  
ACCTGTAGAAATCTCTTATGGACTGGAGCAAATCTCTAGACAGTGGCATTTAAAGTTGAAGAGTCAATTAGAAATTTTGGGT  
AAAGAGAATGAGAGGACAATTGCGTTTGTACAAAGTTATAGAAGGGAATTCATTTCTAATCCTATGTGGATGACACCCTA  
ATTGTTAGTAGTGATGTCAACCTACTGCATGAGAAGAGTTCTTGTCCCTCAAGGTTGAATAAGAAAAATCTCGGTGAATGTGA  
TCTCGTTAAAAGAATTGAAATTCACCGAGATAGAAGAAAAGGGGTATTGACTATCGCATAGGCATGCTAAGAAAAGTTTC  
TAAAGAAATAAAGTACCTATGCGGGTAAACCTATGCCTGTCTAAAGGTCAGGGTAATGTTTTGAGAACTTTGATATTCCAA  
AAGTAATGTAAGATTGATTATAGATGGAGCTCCTATATACTTCAAGTGTGTTAAAAGCTTAATGAGTACAAATGTAAGCTTGCC  
CTGACACAGTTTACATATCCGGGTGTTTTTGGCAAAAGTCCAGTCCAGATATAGATCACTGGAATGGAGTTAAAAATGTCGG  
CCTCATGTAAAAAGAAAAGTACAAGTACTCTCAAGTAGTTGTGGGTACAAATGTTAAATTTTGGCGAGATGTTTAGTGAAC  
CCACATAGTAGCTAACACTCGCAGTTGGAGTTTTATTGTGAAAAAGTCCAAAAGAAACAGTTCTAGTATCATCAGTGATGT  
AAGTAAATGTAAGATTGATGAGGTGAGGGACAGGGCAAGGTTAAAGTAACTTGTAACCGGATGTAATGATGCTTGTC  
AACAGCAATGACCATTAAAGTAGTTTGTCTCTATAACAACGAGTCAAGTGTGCTGCCAAACACATTGACATTAAAGTTATACG  
TTGTAAAGGAGAAAGTCCGGAATCATACTAAAAGTATTGAACGTAAAGGTAAACAAGCAAGTGCTTGGCGATCCGTTTACTAA  
AGGCTTACCACCCAGTGTGTTTCAGAGAACACACAGTCGACATGGGTTTATGGTATAGCCTATGATTTCCGGACAATAAAGGG  
CCCAAGGTTAAAGAATCTGTTTTCAGATCAGAGATGTGTATTGTAGCTGTTGAATCTATCGGCGACTGACCGTGACGATGAGG  
CATGCTCTATACACTGATTGTGTATGGAACAAATAAAAGTAAAGAAATTAAGTCAAAAGTTAAAGTTAAAGTAAAGTTGAG  
ATCAAGGGGGGAGAAATGTTGGAATTGATCTCCACCCGATTAGGCCCAACGGCCTAATTGGGCCCTGACTCGTGCCCTGATCGG  
GGCGCTCAACCCATTGAGGTTGGTGGGCCCGTCGCACACTGAGTCCATATAAGAAGAGGTGGGAGCCACGGGCTCAAGTGGC  
AGAGGTTAAACGCCACAGTACACCCACCGTCTAACCTAGCCGATCCCGAGGGTGGCACTGCCAGCGCGGGATGTCCAC  
CGGCGATGCCAGTGATCGCTTCTCGCCACCTCCACCGACTTCACGACGGACTTCACTTAGGACGGCGGTGAGTAACGTCTC  
CCGTTCCCATCCTCTCTCTCTCTCTCTCATTAAGACGGTTATCCCAAATGTAATAAGAACTGCCCGCTAGATCTACCACT  
GGACGATCGTAAAAATTCAACAAAGCA

>SsLRR-RLK414

GATGAATACATATGTTATGTTTAAAGCAATTATGAAAAAAAACATTCCCTTAACCATTGATATAGGAATAAATATTTTCATCAAAA  
AATATAGGAATAATATTAACAAATTTATTAAAGTTATATTAATGCAATGCCATATAATTTATATAATTTGTACTTTAGATAAAATTG  
TATCTTTTAAACAGATCTGTGTAGTATATCTATATTGATTGTATAATTGTAGGAAGTCTATTTTATAATAAAGTAATGTTGATACA  
GATATAATGTTTGTATAAGAAAAATCCAAATAACTTGGGAAGTGGGGGGAGGTTGGTGAGAGCAATTGGTGGAATAACCTTT  
TATGGTCTTGTGATTGAGTAAAGTGATTATAAAGCCATAAATTTGTATCCTCTCTCTTGTAGCAGGTTACCTTACTTCA  
GACCATACTCCAAGCTCTATCATCGATCTTGAGCGATGGGTACATGTTTAAATGACCATTATGTCTATCTAGTATTTAAGAAATC  
TGTTTATACGATCTAAAGTCTTATTTATAATAAACATAAAATGAGAGTTAATAAAAGATACGATAAGCATAAGAGTTCCAAC  
TAACATGTAGATTAAAAAAATTTATGGCAACTATAAGATCAAAATTTGAAAATAGAAATATATGTTTATAAGATATGGGTTGTA  
ACAAGAGCCACAATAATTTATGTTAGAACTTAATGCATATTGAAAATATATCATGACGTGTCATACTAAGAGAAAAAGAAATGAA  
TAGGGATGAAAAAACATATAGATCAATAATTAATAAGTTTACCACAACCTAGATATAAATGATATAGTATCTATCTACCTATTATGT  
TAGAAAAATAAACAAAGAGGAAAAACATATAAATTAATATAAATAATTGTAGTTGGTATTAACACCAATATCTTATGTTTATGT  
CTTGCAAGATTGACATGGATCAAGAACCTAATGCCTATTGAAAATATACTGAATAGAAAGAGAAAAACAACATGGATGAGG  
GATGAAAAAATGTGGATCAATAATTGATAAGTTTAAATAGATATAAATATATAGTATCTACATGTCTACTAGATAAATGCCCGTG  
CGTTGCAACGGGTACAATAATATGAACATGATAATTATAGTTCGCACATATGTTGTACCGTAGCCAAACAAAACCACTTTTAA  
ATATAAACACAGAGAAAGAAACATGGAAATTTATACAGCTAGTTTAAATTAGTGCTAGGTATACAATCATCAACTCTAATGTT  
TATGATTTTACTCTATAGTGGGCAGTGATGGACCCCACTAGCTTAAACAAAGGAAAAAATGCTATAAECTCAACAAACAAAA  
ATCTAAATTAATTTTCGATTGCACCATTAATTCGTCTCAATAAATCCTTTAAACTAGATCACACATGGATATATTTAGATAAA  
ATAATAAGTGGGTCTATAGTGGATAGAATAGATAGAGGATGATATAGAGGATGGATGGTGCAGGAGAAATTAAGTATAAATA  
GAGAATCTTCTGACTAGGACGTATAGAGGATGAATATAGAGGTCCATAAGTGCAGGATAGTCTCATGCCCCTCTGTTATAAGA  
ATCTTCTAGTAAGTTCACTACCCGTATAGTCTGAACGTCAAGAACACACACTTCATGGTGACAAAA

>SsLRR-RLK200

GCCGTTGGCAATCGCCGGGTTCCCGAAGCTCAAGTCTGTTGGTCTCGACACTAATAGCTTCAATGGGAGCTACCCGGGTGCC  
GCCATCGGCAACCTCACGCAGCTCGAGACGTAACGCTGGCTAGTAACCCCTTCGCGCCAGGCCCATCCCTGACGAGTTT  
GGCAAGTTGAAGAAGCTGAAGATGCTGTGGATGTGGGGATGAACCTGACTGGTGGCATCCCTGACAAACTGTCTGCTCGCTC  
ACTGAGCTGACGCTGTTGGCTTTGTCCGACAATAACTTTGACGGTGAAATCCCGGGGTGGATTTGGAAGCTTCAGAAGCTTG  
AGATCCCTGACCTTTTTCGAACAGCTTCGCCGGTGCAATTGGGCCAAATATCACCGCGGTGAGCTCACAAGAGATCGACT  
TTCCGGAACCTGGCTACCCGGGCACATACCCGAGAGCATCGGCAACTTGAAGAATTTGTGGTGTCTACCTGTACTTCAAC  
AACCTCACCCGGGCCGATCCCGTCGAGCGTTCGGGCGGCTCCGGAACGTCGAGGACATCCGGCTGTTCAACAACAGGCTCTCC  
GGTCCGATTCCGGAGAGCATTGGCAACTTGAAGAACTTGGGTTGCTCTACTTGTACTTCAATAACCTACCCGGGCCGATT  
CGTGAGCTCGGGCTGCTCCGGAACCTCGAGGACATCGGCTGTTCAACAACAGGCTCTCCGGCCCCCTCCCTTAACAAA  
CCATATCATTGTACTAGCAATTTTATTCATAATGTTATGTGTCACCATATGTAACCAAGTAAATAAACAACAAAAAGATTCTA  
TGTTTGGATAAAGATTTATTTAATAGTTTATCAATCATGTTCCTTCAACAAACCATATCATTGTACTAGCAATTTTATTTTAA  
ATTATATTAACCTCCATGACTAGGATGATGAGGATGAATATAGAGGTGTTATTTTATGTTTAAATAATTTTGAATAAATTTTACGCA  
CTCTACATATATTTGGATAATAAACTAGTACCATATTTCTCCGTATAGTAAATTTAGCATCTCGAGTACTGTGATGGATGCTAA  
ACCACCGTAGTATGAAAAAGTTTAACTGGGACCAATCTTCTTAAATATAAAATGAGAAAAAGTAAAAAATTTGAATTAATA  
TACAATAAGCACTAGAGTTTCAACACTTAGATACGAAAGTTGAAAAAATAGGGATTCATGATGTTATAACGAGGTGTAA

CAAGAGTTTGTATTACTTAACTTAGGTTTCAACTAGGGTGTAACAAGAGTTTATATTACTTAATCTTAGGTTTCAACTAAATC  
ATATCGCATAGAAAAAAGATGAAACCTAGATATTCGAAATACAGGTCGAGCCTCCATGGTAATCCTCACCAGAACGACTA  
GAAGAAAAAGATAATCTTTAGAACCTAATAAAAAACACAAAATTTGGTGCCTCAATTATGTATACATATAATCACAAATGATA  
ATAATAGCAATTTGGACATATTATCTTTTCTCGATAATTACCATTTGAGTTTATGAAAAACAAAATAAAATAGCCCATGAATATGT  
ATCTAAACTACACCCTTATGTTGTTATGAAACATAATCTAAAGTCTACATTTACCTAAATTTGCATCTAATTACTTACCTTCCA  
TTATGATAGATAATCTATGTAATCCCTTAAATTTGCATTGAAATTTGCCACTTCTTTCAATTTTTTAAAAATACTTTAAGATTTCC  
TAAATATATATACAAAGTAATTTATGGTAGAACTTAATGCCTATAGAAAAATATACTGAACACAAAGAGAAAAAGGACAATGGA  
TAGGGATGAAAAAATGTAGATCAATAAATCGATAAGTTTATATGTGGTATAAATTATATAGTATCTATATCTTATGTTGGAA  
AATAAAAAAGAGAGAATGAAACATGGAAATTTATAAGTAATTTGAATTAGTACTTGGTATTAATCATCAGCATCTAATGCTTAT  
>SsLRR-RLK228  
GACGGTGAAATCCCGGGGTGGATTGGAAGCTTCAGAAGCTTGAGATCCTGTACCTTTTTTCCAACAGCTTCGCCGGTGCAA  
TTGGGCCAAATATCACGCCGTGAGCCTACAAGAGATCGACCTTTCCGCGAACTGGCTCACCGGGGCACATACCCGAGAGCA  
TCGGCAACTTGAAGAATTTGTGGTTGCTCTACCTGTACTTCAACAACCTCACCGGGCCGATCCCGTCGAGCGTCGGGCGGCT  
CCGGAACGTCGAGACATCCGGCTGTTCAACAACAGGCTCTCCGGTCCGATTCCGGAGAGCATTGGCAACTTGAAGAACTT  
GGGGTTGCTCTACTTTGTACTTCAATAACCTCACCGGGCCGATTCCGTCGAGCCTCGGGCTGCTCCGGAACCTCGAGGACAT  
CCGGCTGTTCAACAACAGGCTCTCCGGCCCCCTCCCTTAAACAACCATATCATTGTACTAGCAATTTTTATTCTAATGTTATG  
TGTACCATTATGAAACCAAGTAAATAACAAAAAAGATGATTGTTGGATAAAGATTTATTTTAATGTTTATCAATCAT  
GTTCCCTTCAACAACCATATCATTGTACTAGCAATTTTTATTTTAAATTATATTAACACTCCATGCTATAAATTTATAAGTTGTT  
ATTTTTATGTTTATTAATTTTGACTAAAAACATTATGTAATTTTACGCACTCTACATATATTGGATAATAAACTAGTACCATATTC  
TTCCGTATAGTAAATTTAGCATCTCGAGTACTGTATGGATGCTAAACCACCGTAGTATGAAAAAGTTTAACTTGGGACCAAT  
CTTCTTTAATATAAATGAAAAAAGTAAAAAAATTTGAATAAAATATACAATAAGCACTAGAGTTTCAACACTTAGATACG  
AAAGTTGAAAAAATAGGGATTTCATGATGTTATAAACGAGGTGTAACAAGAGTTTGTATTACTTAACTTAGGTTTCAACTAG  
GGTGTAAACAAGAGTTTATATTACTTAATCTTAGGTTTCAACTAAATCATATCGCATTAGAAAAAAGATGAAACCTAGATATTC  
GAAATACAGGTCGAGCCTCCATGGTAATCCTACCAGAAAGCACTAGAAGAAAAAAGATAATTTCTAGAACACTTAGATACG  
CACAAAAATTGGTGCCTCAATTATGTATACTATAATCACAATTGATAATAATAGCAATTGGACATATTATCTTTTCTCGATAATTA  
CCCATTTGAGTTTATGAAAAACAAAATAAAATAGCCCATGAATATGTATCTAAACTACACCCTTATGTTGTTATGAAACATAAT  
CTAAAGTCTACATTTACCTAAATTTGCATCTAATTACTTCCACTTCCATTATGATAGATAATCTATGTAATCCCTTAAATTTGCATT  
GAAATTTGCCACTTCTTTCAATTTTTTAAAAATACTTTAAGATTTTCCATAAATATATATCAAGTAATTTCTAGGTAGAACTTAAT  
GCCTATAGAAAATATACTGAACACAAAGAGAAAAAGGACAATGGATAGGGATGAAAAAATGTAGATCAATAAATCGATAAGT  
TTATATGTGGTATAAATATATAGTATCTATATCTTATGTTGGAAAAATAAAAGAGAGAATGAAACATGGAAAAATTTATAA  
GTAATTTGAATTAGTACTTGGTATTAATCATCAGCATCTAATGCTTATGTTCTTCTAGGATTTTAGTCCGGATCGAGAAGCATGTA  
TAATTAGGGTCGTGGAACCTGCTATCACACACTAGTGCTAGATAACAAAATTGTCCATCGGTATATCTTCACTAATCAGTGT  
GCGCAAAGACTTTGACTGTGCAGTCGTTGGTCGTTGCTTATGCCGCATGCGCAGTGCGCACTACCCGCTGGCCTCTTCTTA  
TATGAACCTTCCTAGTAAGTTCACCTACCATAGTCTGAACTGAACGTCAAGAACACAACTTCATGGTGACAAAAA  
>SsLRR-RLK249  
TAGACTTTGATCGTAATCACCGATAATAGCCATTAGATTTATGTTTACAAAAAACCACCTCTATCATAATAAAAA  
AGAATACATAAAAGTAACCATCTAACTTTGCATCTAAATTAGAAAAATAACCTCCTGGATTGAAATCTAAATATCCATAAATGT  
TAGTGTGTCACCATGTAGAAAAATAACCTCTATCCTAGATTAGAAAAATAACCTCCTGGATATAAGTATGCTATGTGTCAT  
ATGTAGACCAAGTAAACAATAAAGATTACACATTTGGATAAATATCTATTTAATAATTTATCAAGCGTGTTCCTTAAACAAA  
CCATGTCATTGTACGGACAATTTGTATTTTAAATTACATTAATACCTCTATGATAACAAATTTGAGAGTTGTTATTTAAGTTCAAT  
TATTTTGAACAAAAACAATTTGTAATTTAAGCACTCTATATTTTGATAAAAAATTACTCCCATATAATTTCCCGATATAGCAAT  
TAAGCATCTTGAAGTGTGCTGTACATGCTAAACCACCGTACTAACAAGAATTTAACTTGGACCAATCTTTTAAAGAAAAAT  
AAAATTAATTTTAAATAAAATATACAATAATCACTAGAGTTTCAACTTAACACATGGACACAAAAAGTTATAAAAAACGTGT  
AAGATCAAAAGTTAAAGAGTAAATATAGATTCAAGATGTTACAAAAATGGGATGTAACAAGAGTTTCTAAATAGAGGTTCCG  
AATAGACCTCCACGGTAATCGTTATCAGAATCTTAGAAAAAATAATAATTTAATAAACTCTGACAAAAATACAAAGTC  
GTGGCCATCAATTCAGCATACTCCAATCGCAGTTGATAACAATAGCAATCAGACATTTATGTTTTCTAGATAATTACCCACTTG  
TGAATCTCCAACTAAATATACACTTATGCCATTATGAAAAGTATTCTAAAGTCTAAATTAGCCTAAATTTGCACCTAATTACC  
TATCGTCCATTACGATATATAATTTACATGACACCTTAAATTTTCATCTAAATTTGTCACTTTTGTCAATTATAAAAATACCAAAGT  
ATCCCTTCAAATCTATATCAAAAGTGTATGAAAAATATTCATAAACCAAAATATACATATATATACATTTCTAACTATCTCTAT  
TAATATATTTAAATGATTAAGTAAACTTACATGTTGTATCATGATGCATGCATGAGCAATGAATATATATATGCTATGCTTTCTG  
CAATTACGAAAGATGTTCCCTTAGCCGTTGATATATAGGAATGATATTAACAAATTTATTTAAATTTATGTTAATATCATGACATTT  
AATTTAGAAAAATTTGTAATTTAGATAAAATTTGATTTTAACTGAATTTGTAGTATATCTATATTTGATTGTAATTTAGGAG  
ACTCTATTTTATAATAAATAAGTAAGATTGCTTATGACTTGCAAGATTTTACACGGACCGAGAGTAATAATAGGAATCAAA  
AGGGTCATGGCTATCCACAACTATAGTGCTAGATAACAAATTTGCCGTCAGAGTATCTTTCACGAATCAGTGTGGGCGAAG  
ACTTTGACTGTGAGTCTGTTGGTCATTGTCTTATTGCCGATGCGGCAGTGCCCACTGCCCACTGCCCACTGCTCTGGTTATA  
AGAATCTTCCATCTAAGGCTGGTTAGATTGAAAGTTTTTCAACTCGATGAATAGTACTATTTTCGTTCTTATTGACAAATAT  
TGTCCAATTGTGGACCACTAGACTCAAAAGATTCTCTCGTATTGTTCCAACTAAACTGTGTAATTAGTTATTTTTTACCTAC  
ATTTAATACTCCATGCAACGACTAAAAATGATGTGATGGAGAGAAAGTGAAAAAATTTGGAATTTGAGGAAAACTAA  
CACGGCCTAAGTTCATCATATAGTCTGAACGTGAAGAACACACACCTCATGGTGACAAA  
>SsLRR-RLK8  
TATCGTCATATAGATCAAGGACACATGCATGCATGAGCGATGAATATATATGTTATGTTTAAAGCAATTATGAAAAAATTC  
CCTTAACCATTTGATATAGGAATAAATATTTTCATCAAAAAATATAGGAATAATATTAACAAATTTATTTAAAGTTATATTAATGCAA  
TGCCATATAATTTATAAATTTGTACTTTAGATAAACTGTATCTTTTAAACAGATCTGTGTAGTATATCTATATTGATTGTATAATT  
GTAGGAAGTCTATTTTATAATAAAGTAATGTTGATACAGATATAATGCTTTGATAAGAAAAATCCAAATAACTTGGGAAGTGGGG  
GAGGTTGGTGAGAGCAATAGGTGGTAATACCTTTTATGGTCTTATATTTGAGTAAAAAGTGATTATAAAGCCATAATATTG  
TATCCTCTTCTGTTAGCACGGTTACCCTATTCTAGACCATACTCCAAGCTCTATCATCGATCTTGAGCGTTAATAAAAGATACG  
ATCTAAAATCTTTTTATACGATCTAAAATCCTTATTTATAATAAACATAAAATGAGAGTTAATAAAAGATACGATAAGCATAAG  
AGTTCCAACCTAACATGTAGATTAAAAACTTATGGCAACTATAAGATCAAAATTTGAAAAATAGAAATATATGTTTCATAAAGAT  
ATGGGTTGTAACAAGAGCCACAATAATTTATGTTGAACCTTAATGCATATTGAAAAATATACTGACGTGTCATACAAGAGAAAA  
AAGAATGAATAGGGATGAAAAAACATATAGATCAATAATTAAGTTTACCACAACCTAGATATAGATATGATCTATCTATCTA  
CCTATTATGTTAGAAAAATAAACAAAGAGGAAAAACATATAAATTAATATAAATAATTGTAGTTGGTATTAACACCAATATCTT  
ATGTTTATGTCTTGCAAGATTTAGCATGGATCAAGAATTAATGCCTATTGAAAAATATACTGAATAGAAAGAGAAAAAATA  
TGGCATAGGGATGAAAAATGTGGATCAATAATGATAAGTTAATAGATATAAATATATAGTATCTATATGTCTACTAGATAAAT  
GCGCGTGGCTTGCAACGGGTACAATAAATAAGAACATGATTAATAGTTTCGACACATATGTTGTACCGCAACAAACCA  
TTTTTTTAAATATAAACACAGAGAAAGAAACATGGAATTTATACCGTAGTTTAAATTAGTGCTAGGTATACAATCATCAACA  
TCTAATGTTTATGTATTTCTACTGTATAAGATTTTAGTCCGGATCGAGAAGCAGTAATAATTGAGGTGCTGGAAACATGCTATCA  
CACATATAGTCTATAGATAGAGTAAAAACTGTACACTGGATCTCTAAAAATACTCTATCTTTCTCTCACTCTATATTAGAG  
TAATACAGTGTTTACTCTATAGTGGGCAGTGGCGGACCCCACTAGCTAAACAAAGGAAAAAATGCTATAACTCACAAACAAA

AAATCCAAATTAAATTTTGATTGCACCATTAATTCGTCCAATAAATCTTCAAACTAGATCACACATGGATATATTTAGATAA  
AATGATAAGTGGGTCCCATAGTGGATAGAAATAGATAGAGGATGATATAGAGGATGGATGGATGCGGAGAAATTGAGTATAGATG  
AGAAATCTTACTGACTAGGACGTATAAGATGAATATAGAGGTCATGAATGTGGATAGTCTCATGCCCCCTTGTATATAAGAAAT  
CTTCTAGTAAGTTCACTCACCATATAGTCTGAACGTCAAGAACACACACTTCATGGTGACAAAAA

>SsLRRL-RLK7

ATGTTATGTTTAAAGCAATTATGAAGAAAAAACATTCCCTTAAACCATTGATATAGGAATAAATATTTTCATCAAAAAATATAGG  
AATAATATTAACAAATTTTAAAGTTATATTAATGCAATGCCATATAAATTTATATAATTTGTTACTTTAGATAAAATGTATCTTTT  
AACAGATCTGTGTAGTATATCTATATTGATTGTATAATTGTAGGAAGTCTATTTTATAATAAAGTAATGTTGATACAGATATAATG  
CTTTGATAAGAAAAATCCAAATAACTTTGGGAAGTGGGGGGAGGTTGGTGAGAGCAATTGGTGGCAATACCTTTTATGGTCTT  
TGTGATTTTGAGTAAAAAGTGATTATAAAAGCCATAAATTTGTATCCTCTTCTTGTAGCACGGTTACCCCTATTCTAGACCATACT  
CCAAGCTCTATCATCGATCTTGAGCGATGGGTACATGTTTAATGACCATTATGTCATCTTAGTATTTAAGAATTCTGTTTATAC  
GATCTAAAGTCCTTATTTATAATAAACATAAAATGAGAGTTAATAAAAGATACGATAAGCATAAGAGTTCACACTTAACATGTA  
GATTAATAAACTTATGGCAACTATAAGATCAAAATTTGAAAAATAGAAATATATGTTTCATAAAGATATGGGTTGTAACAAGAGC  
CACAATAATTTATGTTAGAACTTAATGCATATTTGAAAAATATCTGACGTGTCATACTAAGAGAAAAAAGAATGAATAGGGATG  
AAAAAACATATAGATCAATAATTAATAAGTTTACCACAACCTAGATATAAATGATATAGTATCTATCTACCTATTATGTTAGAAAAAT  
AAACAAAGAGGAAAAACATATAAATTAATATAAATAATTGTAGTTGGTATTAACACCAATATCTTATGTTTATGTCCTTGCAAG  
ATTTAGCATGGATCAAGAACTTAATGCCATTGAAAAATATACTGAAATAGAAAAGAGAAAAACAACCTATGATAGGGATGAAAA  
AATGTGGATCAATAATTGATAAGTTTAATAGATATAAATATATAGTATCTACATGTCTACTAGATAAATGCCCGTGCCTTGCAA  
CGGGTACAATAATATGAACATGATAATTATAGTTTCGCACATATGTTGTACCGTAGCCAAACAAAACCACTTTTAAAAATATAAA  
CACAGAGAAAGAAACATGGAAATTATTACACGTAGTTTAAATTAGTGCTAGGTATACAAATCATCAACATCTAATGTTTATGTAT  
TCTATGTGTACACCATGTTAGTCCGGATCGAGAAGCAGTAATAATTGAGGTGCTGGAACCATGCTATCACACATGATGTATGTA  
TAACAAAATTGTCCATCGGAGTATCTTCACTAATCAGTGTGGCAAAGACTTTGACTGTGAGTCTGTTGGTCATTGCTTATT  
GCCGCATGCGCAGTGGCCTGTCCTGCTGGCCTCAGACTAGTGCAGTGGGTAAGCTTAAGCGATACACTTAAAGTTTATAGAG  
TATGAATATAGAGTAAAAAGTCTACACTGGATCTTAAATAATATCTATCTTTTCTCTCACTCTATATTTAGAGTAAATCA  
GTGTTTACTCTATAGTGGGCAGTGATGGACCCACTAGCTAAACAAAGGAAAAAATGCTATAACTCACAACAAAAA  
TCTAAATTAATTTTCGATTGCACCATTAATTCGTCTCAATAAATCCTTTAAAACTAGATCACACATGGATATATTTAGATAAAA  
TAATAAGTGGTCTTATAGTGGATAGAAATAGATAGAGGATGATATAGAGGATGGATGGGTGCAGGAGAATTAAGTATAAATAA  
GAATCTTCTGACTAGGACGTATAGGATGAATATAGAGGTCCATAAAGTGGGATAGTCTCATGCCCCCTTGTATATAAGA  
ATCTTCTAGTAAGTTCACCTACCGTATAGTCTGAACGTCAAGAACACACACTTCATGGTGACAAAAATG

>SsLRRL-RLK203

CTTAGTACTAACTTTTTCCCAAAATATGTACATATTATGAAAACTATCGATTTTACTATTACTAACTAGAGATTCTAAAGGAG  
TTTTCATATTAACCTCTCATAAGACACGTTAGGGAAAAGAAAAAACTTATAAACTCTCGTAATAAAAAAAGAATGACCTTTAAT  
TTGGTAGACTTTGATCGTAATCACCGATAATAGCCATTAGATTATTATGTTTTACAAAAAAAATACCCACCTCTATCATAATAA  
AAAGAATACATAAAGTAACCATCTAATTTGCATCTAAATTAGAAAAATAACCTCCTGGATTGAACTTAAATTATCCATAAAT  
GTTATGTGTACACCATGTAGAAAAATAACCTCTATCCTAGATTAGAAAAATAACCTCCTGGATATAAGTATAATGCTATGTGTCA  
CTATGTAGACCAAGTAAACAAATAAAGATTACACATTTGGATAAATATCTATTTAATAATTTATCAAGCGTGTCCCTTAACA  
AACCATGTCATTGTACGGACAATTTGTATTTTAAATTACATTAATCTATGATAACAAATTTGAGAGTTGTTATTTAAGTTC  
ATTTATTTGAACAAACAATTTGTAATTTTAAAGCACTCTATATTTTGATAAAAAATTACTCCCATATAATCTCCGATATAGCA  
AATTAAGCATCTTGAGTGTGCTGTACATGCTAAACCACCGTACTAACAAGAAATTTAAACTTTGGACCAATCTTTTTTAAGAA  
AATAAAATTAATTTTTTAAATAAAATATACAATAATCACTAGAGTTTCAACTTAACACATGGACACAAAAAGTTATAAAAACGT  
GTAAGATCAAAAGTTAAAGCTAAAATATAGATTCAAGATGTTACAAAATGGGATGTAACAAGAGTTTGTAATAGAGGTTTC  
GCAATAGAGCCTCCACGGTAATCGTCATCATAATCATTAGAAAAAGATACTAATTTATTAATAAACTTGACAAAAATCACAAAG  
TTGTGGCCATCAATTCAGCATACTCCAATCGCAGTTGATAACAATAGCAATCAGACATTTATGTTTTCTAGATAATTACCCACT  
TGTAATCTCCAACTAAATATACACTTATGCCATTATGAAAAGATTCTTAAATCTAAAAATTAGCCCTAAATTTGCACCTAAATTA  
CTATCGTCCATACGATATAAATTTACATGACCCCTTAAATTTTCACTCTAAATTTGTCACCTTTTGTCTATTAAAAATACAAA  
GTATCCCTTCAATCTATATCAAAAGTGTTATGAAAAATGATTTCATAACCACAAATTATACATATATATACATTTCTAAACTATCCT  
ATTAATATATTTAAATGATTAAAGTAACTTACATGTTGTATCATGATGCATGCATGAGCAATGAATATATATATATGCTATGCTTT  
CTGCAATTACGAAAGATGTTCCCTTAGCCGTTGATATATAGGAATAGTATTAACAAATTTATTTAAATTTATGTTAATATCATGAC  
ATTTAATTTTGAACAAAAACAATTTGTAATTTTAAAGCACTCTATATTTTGATAAAAAATTACTCCCATATAATCTCCGATATAGCA  
AATTAAGCATCTTGAGTGTGCTGTACATGCTAAACCACCGTACTAACAAGAAATTTAAACTTTGGACCAATCTTTTTTAAGAA  
AATAAAATTAATTTTTTAAATAAAATATACAATAATCACTAGAGTTTCAACTTAACACATGGACACAAAAAGTTATAAAAACGT  
GTAAGATCAAAAGTTAAAGCTAAAATATAGATTCAAGATGTTACAAAATGGGATGTAACAAGAGTTTGTAATAGAGGTTTC  
GCAATAGAGCCTCCACGGTAATCGTCATCATAATCATTAGAAAAAGATACTAATTTATTAATAAACTTGACAAAAATCACAAAG  
TTGTGGCCATCAATTCAGCATACTCCAATCGCAGTTGATAACAATAGCAATCAGACATTTATGTTTTCTAGATAATTACCCACT  
TGTAATCTCCAACTAAATATACACTTATGCCATTATGAAAAGATTCTTAAATCTAAAAATTAGCCCTAAATTTGCACCTAAATTA  
CTATCGTCCATACGATATAAATTTACATGACCCCTTAAATTTTCACTCTAAATTTGTCACCTTTTGTCTATTAAAAATACAAA  
GTATCCCTTCAATCTATATCAAAAGTGTTATGAAAAATGATTTCATAACCACAAATTATACATATATATACATTTCTAAACTATCCT  
ATTAATATATTTAAATGATTAAAGTAACTTACATGTTGTATCATGATGCATGCATGAGCAATGAATATATATATATGCTATGCTTT  
CTGCAATTACGAAAGATGTTCCCTTAGCCGTTGATATATAGGAATAGTATTAACAAATTTATTTAAATTTATGTTAATATCATGAC  
ATTTAATTTTGAACAAAAACAATTTGTAATTTTAAAGCACTCTATATTTTGATAAAAAATTACTCCCATATAATCTCCGATATAGCA  
AATTAAGCATCTTGAGTGTGCTGTACATGCTAAACCACCGTACTAACAAGAAATTTAAACTTTGGACCAATCTTTTTTAAGAA  
AATAAAATTAATTTTTTAAATAAAATATACAATAATCACTAGAGTTTCAACTTAACACATGGACACAAAAAGTTATAAAAACGT  
GTAAGATCAAAAGTTAAAGCTAAAATATAGATTCAAGATGTTACAAAATGGGATGTAACAAGAGTTTGTAATAGAGGTTTC  
GCAATAGAGCCTCCACGGTAATCGTCATCATAATCATTAGAAAAAGATACTAATTTATTAATAAACTTGACAAAAATCACAAAG  
TTGTGGCCATCAATTCAGCATACTCCAATCGCAGTTGATAACAATAGCAATCAGACATTTATGTTTTCTAGATAATTACCCACT  
TGTAATCTCCAACTAAATATACACTTATGCCATTATGAAAAGATTCTTAAATCTAAAAATTAGCCCTAAATTTGCACCTAAATTA  
CCTATCGTCCATACGATATAAATTTACATGACCCCTTAAATTTTCACTCTAAATTTGTCACCTTTTGTCTATTAAAAATACAAA  
GTATCCCTTCAATCTATATCAAAAGTGTTATGAAAAATGATTTCATAACCACAAATTATACATATATATACATTTCTAAACTATCCT  
ATTAATATATTTAAATGATTAAAGTAACTTACATGTTGTATCATGATGCATGCATGAGCAATGAATATATATATATGCTATGCTTT  
CTGCAATTACGAAAGATGTTCCCTTAGCCGTTGATATATAGGAATAGTATTAACAAATTTATTTAAATTTATGTTAATATCATGAC  
ATTTAATTTTGAATAATTTGTACTTTAGATAAAATTTGATTTTTTAACTGAAATTTGTAGTATATCTATATTGATTGTATAATTGTA  
GGAACCTCTATTTTTATAATAATAAAGTAAGATTGCTTATGACTTGCAAGATTAGCACGGACCGAGAAGTAGTAATAATGGAAT  
CAAAGGGTCATGGCTATCCACAAACTATAGTGTAGATAACAAATTTGTCGTGAGAGTATCTTTACAGTACAGGTGGGCGAA  
GACTTTGACTGTGAGTCTGTCATTGCTTATGGCGCATGCGCAGTGCCCACTGCCCACTGCCCTGCTGCTGTTAT  
AAGAATCTTCTACTAAGTTCACCTCATCATATAGTCTGAACGTGAAGAACACACACCTCATGGTGACAAAAATGGCTCACTC  
CTATCTTCTACTCCTCTTCTACTACTGTTTCATCACCTTCAGCTCCAGCTTGCAACAATCCA

>SsLRRL-RLK372

CTTAGTACTAACTTTTTCCCAAAATATGTACATATTATGAAAACTATCGATTTTACTATTACTAACTAGAGATTCTAAAGGAG  
TTTTCATATTAACCTCTCATAAGACACGTTAGGGAAAAGAAAAAACTTATAAACTCTCGTAATAAAAAAAGAATGACCTTTAAT  
TTGGTAGACTTTGATCGTAATCACCGATAATAGCCATTAGATTATTATGTTTTACAAAAAAAATACCCACCTCTATCATAATAA  
AAAGAATACATAAAGTAACCATCTAATTTGCATCTAAATTAGAAAAATAACCTCCTGGATTGAACTTAAATTATCCATAAAT  
GTTATGTGTACACCATGTAGAAAAATAACCTCTATCCTAGATTAGAAAAATAACCTCCTGGATATAAGTATAATGCTATGTGTCA  
CTATGTAGACCAAGTAAACAAATAAAGATTACACATTTGGATAAATATCTATTTAATAATTTATCAAGCGTGTCCCTTAACA  
AACCATGTCATTGTACGGACAATTTGTATTTTAAATTACATTAATCTATGATAACAAATTTGAGAGTTGTTATTTAAGTTC  
ATTTAATTTTGAACAAAAACAATTTGTAATTTTAAAGCACTCTATATTTTGATAAAAAATTACTCCCATATAATCTCCGATATAGCA  
AATTAAGCATCTTGAGTGTGCTGTACATGCTAAACCACCGTACTAACAAGAAATTTAAACTTTGGACCAATCTTTTTTAAGAA  
AATAAAATTAATTTTTTAAATAAAATATACAATAATCACTAGAGTTTCAACTTAACACATGGACACAAAAAGTTATAAAAACGT  
GTAAGATCAAAAGTTAAAGCTAAAATATAGATTCAAGATGTTACAAAATGGGATGTAACAAGAGTTTGTAATAGAGGTTTC  
GCAATAGAGCCTCCACGGTAATCGTCATCATAATCATTAGAAAAAGATACTAATTTATTAATAAACTTGACAAAAATCACAAAG  
TTGTGGCCATCAATTCAGCATACTCCAATCGCAGTTGATAACAATAGCAATCAGACATTTATGTTTTCTAGATAATTACCCACT  
TGTAATCTCCAACTAAATATACACTTATGCCATTATGAAAAGATTCTTAAATCTAAAAATTAGCCCTAAATTTGCACCTAAATTA  
CCTATCGTCCATACGATATAAATTTACATGACCCCTTAAATTTTCACTCTAAATTTGTCACCTTTTGTCTATTAAAAATACAAA  
GTATCCCTTCAATCTATATCAAAAGTGTTATGAAAAATGATTTCATAACCACAAATTATACATATATATACATTTCTAAACTATCCT  
ATTAATATATTTAAATGATTAAAGTAACTTACATGTTGTATCATGATGCATGCATGAGCAATGAATATATATATATGCTATGCTTT  
CTGCAATTACGAAAGATGTTCCCTTAGCCGTTGATATATAGGAATAGTATTAACAAATTTATTTAAATTTATGTTAATATCATGAC  
ATTTAATTTTGAATAATTTGTACTTTAGATAAAATTTGATTTTTTAACTGAAATTTGTAGTATATCTATATTGATTGTATAATTGTA  
GGAACCTCTATTTTTATAATAATAAAGTAAGATTGCTTATGACTTGCAAGATTAGCACGGACCGAGAAGTAGTAATAATGGAAT  
CAAAGGGTCATGGCTATCCACAAACTATAGTGTAGATAACAAATTTGTCGTGAGAGTATCTTTACAGTACAGGTGGGCGAA  
GACTTTGACTGTGAGTCTGTCATTGCTTATGGCGCATGCGCAGTGCCCACTGCCCACTGCCCTGCTGCTGTTAT  
AAGAATCTTCTACTAAGTTCACCTCATCATATAGTCTGAACGTGAAGAACACACACCTCATGGTGACAAAAATGGCTCACTC  
CTATCTTCTACTCCTCTTCTACTACTGTTTCATCACCTTCAGCTCCAGCTTGCAACAATCCA

>SsLRRL-RLK374

CAGGCTGKRSGT  
GTGAAAGCCATAGGGCATGTGTTGCTTCGGCGCGTGCTCATCGGCACGTCATCCAGCCACCATACTGAAAATTGACAGC

>SsLRR-RLK352

>SsLRR-RLK186

>SsLRR-RLK146

ACTCAGGGTTTTATCCCCACTTGGTGCAGGTTGTGGTGATCTTGGCGACTGCAAGAGTTGGTTGGCTCCTGCCTTGTGGCG  
GAGTGTGATCACGGCGAATGATCCTCTCGAGTTACTTCTCTCTAATGCTTTTGTTGGAAGTCGACCTTGGTACTGGCATGTATT  
TAAAACTCAAAGTAATGTTAGTTTCCAAATTACTTTGCTCCGCTACTTTTCAAGTCTTAAAGTTGTAATAACTTTATTGAACCTCCGAT  
GCATATTTAATGACTTGTGAAATGGTTGTAACATGTGACTTGTATGTTGAATCACTACGACTTGGCTGTGATGTGGTTGGT

TTGAAATCCTGTGTGATTTCATTGGACTACCGGAGTTATATGGGCTCAAGTGCGAGAATTTGATCACTTCGGTGATTGTTTTTG  
TACTTGTGCTCTTATAATTTGGACGGTTCTGTACATGGTGCCAGGCCACGCGTCCAGGCGGTGCGGGGACGGCATGGCT  
TCGGGCTGAGGCCCTCACCTTCGGACGACGACGAGCGAGCGGGCTAGGTCGGCGTGGTGGAGGACGCGCGCGGAGCTGTG  
GACGCGGTGGCTTGGCTGGGGAAGCATCGGCGGCGACGCTACGTGGTTCGCGACGGTGAAGGCGACGGCGCTGCTCGGCTG  
CAGACGCGAGGGTGAGCGAAGGAGGCGATGAGGCGAATATTGTGTAGTCCGATTGTGATTGTAAATCTGTTTCGGGGTAGGA  
GACGTGAGTGAGGATGAATACGATACCTCATCACGTAACCTGGATACATGGCTGGCAGACAGAAAATTAGAGGGCGGAAAC  
AAATTTGAGTGCAGAAAATTTCTCTTTTAAATATTAGGTATAGATATAGATATCTAGATATTTAGTCATGAAAAATAAATATGAAT  
TTTATTATAATTGAATTACGGGTGGTACATCATGATGAATAGTTATATTTTAAATTGACGTATTAATATATCGTTATTGCTA  
TTTTGTATGATTTTTCAATCACACATCAATCACAATCATAAGCACGTGCGTGTGCGACGTGCGATATAAATATATTTTACTTT  
CCCCAATCAATAAATCCGCATGAGTCAGCAAATGAAAAGGATTAACAGGTCGTTTCATGGTTCTACTGTCCAAGAGACCAGG  
AGCTGTCTCAGTTGATTTCCTCCGGCCGATTGGCTTCAGAACTGCAGTGTCCAGATTCTATCCAAAAGTTAACCTGCAGAT  
TACAGAAAGAGATTGGGAATTTAATTGACCTGAAGCATACAGGATTTCTGCAGGGCCGGTCCATCTCTGAATCTTTGTATAT  
GCAGCTGAGATTGTTCAAACCTGATATAAGAGGAAGATTCCAACGATTGTGCTTAAGCTGGATTGTGCAAAAGCATTTCGACA  
CTGTCAAATGGCTCGGTTTCGGACAGTATTCTAGCTGCTCGAGGCTTCAACTCCAAATGGAGAAGATTGGATGCGGTGTGTTCT  
CAACTCCTCGAGATCTGCTGTTCTTATTAATGGAGTCCCAGGGCCATGGATTTCGTGCAAACTGGATTAAAGCGAGGGCGAC  
CCCATCTAGCCATACCTTTTTCTTCTATACTAGTTGTTGACACCCTTCAAATTTCTAAAAATTTTACATTGTGCACATCAAATCTT  
GGAAGACCTAGCCAGATTATAAGTCAACATCAAAAATTAACGTTTCAAGTAACTGACACGGCATCAGGAATACAGACGAATCTT  
GAACCTAATTAGTCCATGATTGGACATTAATTGTCAAATACAAACAAAAGTATTACTGTGCTTCCAAAAAATTTACATGTGCA  
ATTAAACACAGCTACAGGTGCAACTAAACGCGACCTAAAGACTTTCAAGCACCATCAGACATCCAATTGACCAGGCGTCA  
GTTGCTGTGACCCTGCAGTACGCGGATGATACCTTAATTGTCTTATAATAGGTGAGGCTAGTGGAGTCTCTAAGCTCAAGGAA  
GTACGGGCAT

>SsLRR-RLK187

AGTACTACTTTCGTCTTATTTGGAAAATATTATCCAATCGTAGATCAACTAGGCTCAAAAAGATTATCTCGTGATTTTCAACTA  
AACTGTGTAATTAGTTATTTTTTTTACCTATATTTTACTACTTTATGTATGAGTCCAAAAGATTGATGTGAGAAGAGAGATGAA  
AAAATTTTAACTTTTGGGTGCATCTAAACAAGAGCTTAATGGCGTAGCAGTAGCTTACATCCCTTCATAGGATTGTGCTGCTAT  
ATTTTAGTAGTGTGGCATTATTACCAAGGGGATGCTATAATAATTTTCACTAGAGAAGAGGGCGACTCGGGCGGCCCTCC  
CCCACGCGGCCACCGCTGGCTGCCGCCAGAGCTCGACGCCGAGGGCCGCGAGAGCAAGGACGGCGCGGCTGGGCT  
TTTTCTTCTCGTCCCTCCCTCTCCCTCCCTCTCTCTCCGAGGAGCTCCCGTGCAGACTGTGCGGCGCGGCTTCCC  
AGCAGCGGCGAGCGCGGATCCGATCCATTAGGCTTCATCATCTGTATCAAGCATCTTCACATTGTGTCCAGAAAAGTGT  
TCCATTTACCCGTAATGTCCCTCCTTGAGTTTGTGGATTTTTAAATGGATTGACTAACTTGTGTAGGCCAATTGATGACTCT  
GGAAGACCTAGCCAGATTATAAGTCAACATCTCCAATTAACGTTTCAAGTAACTGACACGGCATCAGGAATACAGACGAATCTT  
CAGGCATCATTAAATCACATATTTTTCATTAAACATTGTGCACAGCCCTAGCAGAAAGTGAAGTCACTCCCCACTGCGGCTAACTACTC  
CCCATCCTCCACTGGCCAAGCCATTGACAAGGACGGCGAGATCAGCCAGTGAAAAATACGAGAAAAAGATTGATGATGGCTGC  
AGAGGAAGAAATGAATCCATTGCAATATTCATTTCTTCTGCTTTTGTACAGTTGAGCGCATGATTTAGACGAATGGCTGGT  
TCTGAACCTCTGTAGCAAATGTAATGATCAAAACGGTGTTTTGCAAGGAATTCAAAATTTAATGGCTAAACTGTGTCTGTAAAGT  
GATTGAAAGTAAATATGGCCTTGTGGAAAGCGTCTGAAATTCATTGGGAAATATCTGTTACATATATATGCCTTTTTCTGCTTTC  
ATTGTATATTATTAGGTACCATAATGAGAAAAATAAATCACCGCATAACGCCACAACCTTCTGACGATAATCAGAGTTCAT  
ATGTTTCAAGAGCTTCAACAGCAGAGAATTGCTGAATTGATGTGAGAAAATTTCTATTAGGTCAGTAACTTTCAGATTGA  
GTTATTTATATTTTGTATTATGGTATATTATCCTAGAATACAACATGTGTTTATTATTTCCCTCCATTATGCATAGAAGTTTCAAC  
AGTTTGCATCTTGTCACTCTGCAGGAGTCTCTAATGATGGATCAATATGGGCACCTGGCAGTAAAGGGAACAAATACCCC  
ATCTCACAATTGAACAGATATTACGCTTATATCCTGCATTTGCCCAATTTGTATTTCGGAAGATCATAATTTGGTAAACACCTTG  
AAAATGGATGTGAGCTTAGAAATAGGGCAATACTTTTGAAGCCATAAGTGAATAATAGGACTGTTTCAACTGTTCATGATGTC  
TAAATTGAGTTGTAACATATGAATGGACTCTTGCTTTTGAACCTGAATGCCAGAGCTCCTGGCTTTCCATTTAACCTTTTCTTT  
CATGTGTTAAACGACTCTGGCGTTGTGTCCAAAATCAACCTTGTGTTGGGCTACAATTACATGCAATGTGATATGACATT  
TCAGTTTACATGTTGTTGGGTTGAATGCGAGGATCTTGAACCTTAAAGAGAGAAGGTTAGTGGTTCATATGCATATCTG  
CAGCAAAATGATGCAGACTCAGAATGTGCAACTGTGAATTTGCATGAGCAAAATAAATATGCATGTCTAAACATATGCAGGATG  
GA

>SsLRR-RLK423

GTTTTGATGTGATCGAACGTTGTTACCAATAATGACTGGTGACCTGTGCGCCGCTGTGCTACTATGCTACTGATGAAAAGTG  
TATTATGCAATAGCTCTACTAGTTCAATGCCAAACATCTCGCTCCGGCCTAAAAAGAGCAGAAACGGGCCCATTTTATGAAGA  
GTCTGACGGGTGGGTCCGCGGTGGGAGAACGAGCAGAGAGTAGTGATCGCATGGCGCGGCGCGGCTGTAACTAGGT  
ATGATGCTCGAGCCGATAATATTATCCCGGACAGCATCCCAACCAAGCATCCTGTTTTCGCTTGTCACTGTTCATGATGTC  
TCACGTGTTTGTCCCTGAGATATTTCATTCACCATTTCCATCTTCTCCTCCGTAACAGCTGGTAAATCCGTAGTAGCTGTATT  
TTCCGTGATGCCGTAGCAAGATATGCTAGTCACACGAGAGTCCCGCTATATCCCTCCTTCCCTGATTCTAACCATTTCTTGA  
CGGAATAAGAGAGAGTGCAACTAATCTATTGAAATCCGATTCTATTTTCATATGATTAAAGGATGGACTCTTAGCTTCTTTGTAC  
AAAATGATGACAAAGTTTTCTTGTCTCTGATGCACTATCTCGACGAGAGAGTAGTAGACTATGATGACTATGATGCTGTAGAG  
ACTCTTCGACGCGGATTCTTCTTAACAATCATTTCTCTTCAGTACAATTGAACACAGATTCTAGTGGGAATAGACATAAATC  
GTTTATTCATTTACGCTAGAGCTCGAAGCTAATGAGCTTCTCTTCTGATTCTTGAGCTTCACTTTCGATGGTGTGATTTTGGT  
GGGGAAGCAGGATGAGGAGCCGATAAGAATTGATTCTAGTGGTGATTGAACGGATAAAGGTGGATATGAGTGGAGAGTGGG  
TTTTTAGCTCTTACCTAGGGGTATAAATGAAGAAGTAATTCTCATAGCTCTTCAACATAATCCAGTTATATTTAAGCAITTTG  
CAGAGATCCACATAATCCACTCCGAAGAAGTTAGGAACATAGCTCTGTCAAACAAGCCTAAACAACATGTTCTTACTGCT  
CTCTATTGAATATTACCAAAAATTGCTCTAAAAATCATTTCTCATCCATTTTCCACTGTGTGTCCCAACCTCAATCGCTCTACCA  
AAATTCCTCTAAGATCGGTAGTAGCAGTCGGCACTTGCAATTTACATGTCTTTTCGTGTTGAAACGGATGCACCAAGATAATGC  
AGCACTCCAGCCTTTTTCTCTCTGTTTTCGGTTACGAAAAGTGGCTTTCTAGGCCACAAGAAAAAGCGAAAAATCACTCAACT  
CACGAGGAAATGCAACGCCTAGTATGGTGGAGTGAAGAAATAGTTAGGGTGTAATGATGCACAGATGAATCCAAGCAA  
CAAGTGACCAAACTGCAATTAACAAGTAAAGTCACTCAGCAACAGTGACACTTCCAGCCAGCCAGCCGACCTACG  
TTGAGAGGACCTGTATAGCCACCCATTAATACTGCTCCATCTCCCAAGAACCAGATAAGACAAAAACGCCGGGGTTT  
AACGACGCCCAAATCAAGGGTCCCAGCAACCCTTTGTACTAGTACTCTACTACTCCCTCCATAATCCATCTCCTTGTCTGGC  
CACGCGGCGTAGCGTAACTCAAGTGAGGAAGAGGGAGGAGACGGAGCTGGAGAGAAACGCTCCATATGCTTGTGGGTGC  
GGCACAAGCAACGGCAGCTGCTGAAAGCGTGCGACCGAGCGAACCTCGCCACTGCCCCCTACGCGCCGCGCCCCACATG  
CCTCGGCGACCATCCCGTCTGCTCCTCTTCTCTTCCAGTAGCAAGCGACCGAACGCGCCGGGGGCGCATGCCGTGAC  
CTCGCCGTGCTGGGCGGCGCGCTCTCGGTTGGAGGAAAAAAGTCGTGCGCTTTTCCGGTTCCCGCGGTGGGTTCTTGATC  
GAGGCGGTTGCCGATCGATAATA

>SsLRR-RLK432

GATGGCCGTACTATCAAGAGGGGCAACTTGTTTGTATATCGGTCACTAGTTCCTTGGAGCGATCAACCTTGCATACGTGTT  
AGGATCGAGTGGCGGAGGCAAGTTGAGTGCCTAACTCTTCGAGAAAAATGATTGTGAAAAATACTAACACACATGCACAAGGT  
GGTGATCTCTTGTGTGGTGGCAGATTTCGGAAGGAGGTGGAGTTTGAAGGGTAAAGAGGGGTTGGGGTTTCTCTCTCC  
TCTCGCGAGCTTGCGAGGTGGGATTTCGGCGCTTTCGTGAAAAATGAAACGCTTATTTTCACTACGCCGGAGGTGAAGAAAT  
AGAGGCGAATGGAGGTCACTGGGGTGACCGGACGCCGACAGACGCGGTCTCTGCACGACCGGCGCGTCCGGTCAGTTC  
AACGACGACGTACAGGTGCGCGGGCGCTAGGGTTTGCAGCCGGCGCGTCCGGTCCCTCGCGGAACCGGCGCGTCCGATCAG

ACACCCATTGGTGCAGTGCCTGACAAAAGAGCTGATTGGACGCGCAGCACATCCGGTCACGATGGGAGCTCTCTGGACCGCG  
ATCGGACGCTGGACATGTCGCGTCCGGTCATTGCGTGGAGCGTGTCCGGTTATGTCGTGCGCGCGCTGGGTGCTGTGCGCAC  
CTGTGGCTCCGGTCGGTTGAGCGGCGCGTCCGGTCTGCGGTTTGACCAATTGGCGCGCAGTGACCGTTGAGATCGGGCGGT  
CCATGTTGAATGTGGAGGAACACGTGGACGGTGCATGGTGACCGGACGCGGTGCAGCGCGTCCGGTCAGTTCGACCGGCG  
CATCCGGTCTGCTCGAAATTTGCCAGTGAAAGGGGTAAACGGCTCTATTTGACCGTGGATGTAAGGTCCAAATGGCTAGAGGG  
TGGTGAATAGCCTATTTAAAAATCTACAAGCTTCACTAAAAAACCACGTTAGTATAAAAGATGGCTAAGCTAATTCTAGCACT  
AGCTCAACTACACTATGCAAGCCACCTATACAATACTAGTGAAAGCAAGGCTATGATCTCTAATACACACCAACAAGACTAAGT  
CACTAAGCTACTTACTCATATGTGATAAAAGCTACACTAAGCAAACTACACTAGGACTAGTACAAGAAAGAAAAGAGCAAGT  
GACTTGATTCTTATACCAACGATGTAGAGAAGTAATGCACTCAAAGCATCATGGAGNNNNNNNNNNNNNNNNNNNNNNNNNN  
NNNNNNNNNNNNNNNNNNNNNNNNNNNNNNNNNNNNNNNNNNNNNNNNNNNNNNNNNNNNNNNNNNNNNNNNNNNNNNNN  
GTTTAGTTGGAATCACGAGATGAATCTTTTGTAGTCTAGTTGGTCCACGGTTGGATAATATTTGTCAAATAAGACGAAAGTGG  
TACTATTTCATCGGGTTCACTTTTTTTTGAATCTAAACAAGCCCTAAACAAGTAAAGCTCACTCAGCAACACGCGACACTTCC  
AGCCAGCCAGCCGACCTACGTTGAGAGGACCTGTCTAGCCACCCATTAATACTGCTCCATCTCCCAAGAACCGCAGAT  
AAGACCAAAAACGCGCGGGGTTTAAACGCAAGCCAAATCAAGGGTTTAAAGCAACCACCTTTGTACTAGTACTCTACTACTCCCT  
CCATAATCCATCTCCTTGTGTCGCGGAGCGGCGTAGCGTAACCTCAAGTGAGGAAGAGGGAGGAGACGGAGCTGGAGAGAAA  
CGCTCCATATGCTTGTGGGTGCGGCACAAGCAACGGCAGCTGCTGAAAGCGTGCGACCGAGCGAACCTCGCCACTGCCCC  
GTACGCGCGGCGACCCCTCCGGCGTCTGCGCTTCCGCTTTCGCTCTTCCAGTAGCAAGCGCACCGGACCG  
GCCGGGGGCGCATGCCGTGACCTCGCCGTGCCGGGCGGCGCGCTCTCGGTTGGAGGAAAAAAGTCGTGCGCTTTTCCGGT  
TCCCGCGGTGGGTTCTTGATCGAGGCGGTTGTCGATCGATAATAATGG

>SsLRR-RLK397

ACCGTCTTCTGTGCAATCGGTGGAAGACGCAGGAGTACCCGAGGATGAGCTTGACACCCCTCCTCGTTCCAGGCCTCCAGC  
GGGACATGCTCCATGACGATCTTCACATGGTAGCACCAAGGTGTGCTCAGCACCCCCCCCCAGCGAAAGCCACGGCCGGAT  
GGGGAATAATGGAGCCGCAATCTCGATGTATCCCTGATACAGGGCTCTGTCTTCTCCGGCGGAGATCCAAACTCGGCCACG  
AACTCTGAAGCGCTGTATCTGGTGACGCGGACGGGCGAGAGAGTGCAGCTGCTTGGCCAGGGTATGTGCCACCTCTGGC  
GCATTGGTGCGGTATCCCTCCGGCGGCGACGAGATGACAGCAGCGTGCGCCCCGTAGCTTGTTCCTCACGGAACATGGTCT  
CCGTGGACATGATGTTGATGCAGCGCGCTCGGGGCGCTGATGGCACGCTAGGAACGTACGCCATGGCGGGCTTGGCGT  
CGCGGAATGGCGCGATGCGGGAGCGGAGGGAAGACGATGCGGCTGTGGATGCTTTCGGGTGGGAAGGTGAGCGGGC  
CGGAGTTAGCGGTATGAGGCGAGGGCAGCTGGGACCTGGGCAAGACGCGGAGAGGTGCCCACTCAGCGGACGAGATG  
AACGAACCTGGGTACGGCACTTGGCGACTAGGTGGTGGAGGCGAGGCCACCGAAAACATCTCCCGCGGAAGCGCTTCTTA  
AAGGCAGCCAGGGCGCGGGGGAAGCTCCTCTGGGCGCGGGCTGGGCGCACCGCTGGGACCGGGCTGTGCCAGAAGGG  
GTACGCGCGGCGACCCCTCCGGCGTCTGCGCTTCCGCTTTCGCACTTTGGTGAAAGCGGCTCTCCTCGCCGATTAAAC  
GCCGGAGCACTCGCCATCTCCCTCTTGAATCAGAGAAGCCGTAAAGGCCCTTCCCGCAGCGGGTGGCCGGCGTCCAGGA  
GCCGAGAGCCAAGGCCTTGCAGATCCATCTGCAGAAATGCAATTAGATCCACGCGCTTCCAAGCCGTCTCAGGGGTGCG  
CGTGGTGACTCTGCGCGCGGGCAGGCTGGACCAGCACGGATTTGAGCCTGGTGGCGCTGCACCTTCAGCACGCGTAGGC  
TCTTGCTTCTCAGCACGGGGGGCGGCGGATCGAGGCATCTCCGACGCCGCGACGGCAGATCCGCGGGTGGCGGCTCA  
GATCCGCCAGTGGCCTCAACCGGTGCTAGCTCCGGAAGGGGGCGTGGGGGCCGGGAGCTGGCTCGTAGCATCAGATTC  
CCTGATCTTCGCCACCTTGAGCTTTGGCGCTGGGAGGCGAGGCGACGTAAATGTGGACAGGGCTCTCGTCGCCCAAGTCC  
ACGAGTTCTTCGTGCGCCGCGCCAGCCAGGGGCTCCAGATCTTGACAGACGAAGCAGGCGGGGAGCTGAGTGGAGATC  
TGCTGCAGGGGAGGTGGGCCGAGCTAGGGTGGACGGCGGCGCCCGAGGGAGCGCCGGCGGTGTGGGGGTGGGGGCTCT  
CGCTACCAAGGTCTCCATCCGTCTATAGGCCAATACTCAATTCTCCGAACAAAAAGCCGAACCACTTTGTACTAGTAC  
TCCTACTACTCCCTCCATAATCCATCTCCTTGTGGCCAGGCGGCGTAGCGTAACCTCAAGTGAGGAAGAGGGAGGAGACGG  
AGCTGGAGAGAAAACGCTCCATATGCTTGTGGGTGCGGCACAAGCAACGGCAGCTGCTGAAAGCGTGCGACCGAGCGAAC  
CTCGCCACTGCCCTCACGCGCCGACCCCCACATGCCTCGGCGACCATCCCGTCTGCTCCTCTTGTCTTCCCAGTAGC  
AAGCAACCGAACGCGCGCGGGGGCGCATGCCGTGACCTCGCGGTGCCGGGCGGCCGCGTCTCGGTTGGAGGAAAAAAGT  
CGTCGCTTTTCCGGTTCCCGCGGTGGGTTCTTGATCGAGGCGGTTGTCGATCGATAATA

>SsLRR-RLK411

TTCTGCACTGTTTCCAAAATCTGAATGTGTTGGAAACAGTGACGTGAAATCCCATTGAGACTGGCCTTATCCCGGACACGAT  
CCCACACCACAAGCCTCTGTTTTGCCTTGTGTCATTAGTGCGGTTTACAGTGTTTGTCCCTGTGATCTTCATTACCAATTTCCAT  
CATCTCTCCTTCCGTAACAGCTGGTAAATCCGTAGTAGCTGTAGTTTCTTGTCTGCTGTAGCAAGATATATACTAGTCACACGA  
GAGTCGCGCTATAGGACTATTTGGTTCGCCCTTATAAACTTTAACAGATGTTGATCATAGGGTTGACTATAGGGTATTCGGA  
TATTAATAATAGCTAATATGTTTAAATAGATTTGTCTCGTAAATTAATCTTAATCTGTGCAATTAGTTTCGTAATTAGTCTACGT  
TTAACACTCTATGCTGTTTCAACATTCGATGTGATGCTGTAAAAAAAACAAGGGGAACCAACACCCCGTACTCCT  
TCCATCCTGATTCTAACCATTTCTTGACAGAAACAAGAGAGAGTGCAACTAATCTATTGAAATCCGATTCTATTTTACATTGATTA  
AAAGATGGACTCTTAGCTTCCTTATACAAAATATGATAAGTTTATTGTTCTCCGAATGCAATATATCTCAAGACAGAGAGGGC  
AGACTATAGGACCGTTTGGTAGAACTCCTCGCAACGGATTTCTTTAAACAATCATTTTTCTCTTCCGGTGAATTGAACACAG  
ACTATAGTGGAAAGACATAAATCGTTTATTCATTAACTTAACTAGCTCGAAGCTCGAAGCTAAGGAGCTTCTTCTTGATTCTTAGC  
TTCACTTTTGTAGGAGGATAAGGAGCTGATAAGAATTGATTCTAGTGGTGATTGAATGGATAAATGTGGATATGAGTGGAAG  
TGGGTATTTAGCTCCTACCTCGTGGTATAAATGAAAAAGTAATCTCGTGAGCTCTTACCATAATCCAGTTGCATTTTAAGCA  
TTTGTAGAGATCCACATGATCCACTCCGAAAAAGTTAGGAACATAGCTCTGTCAAAAACAAGCCTAAACAACATGTTCTTA  
CTGCTCTTATTGTAATATTCAACAAAATTGCTCTAAATCATTTCTCATCCATTTTCCACTGTGTGTGCGCAACCTCAATCGGTCT  
ACCAAAATTGCTCTAAGATCGGTAGTAGCAGTCGTCACTTGCATTTCCATGTCTTTTCGTTGTTGAAACGGATGCACCAGAT  
AATGCAGCACTCCAGCCTTTTACTCCTGTTTTTCCGGTTACGAAAAAGTGGCTTTCTAGCCACAAGAAAAAGCGAAAAATCACT  
CAACTACGAGGAAATGCAAAACGCTAGTATGGTGGAGTGAAGAAATTAGTTAGGGGTGAAATGATGCACAGATGAATCCA  
AGCAACAAGTGACCAAAACTGCAATTAACAAGTAAAGCTCACTCAGCAACAGTGACACTTCCAGCCAGCCGACGCGGAC  
CTACGTTGAGAGGACCTGTATAGCCACTATTAATACTGCTCCATCTCCCAAGAACCAGATAAGACCAAAACGCGCGG  
GGTTTAAACGCGCCCAATCAAGGGGTTAAGCAACCCTTTGTACTAGTACTCCCTCCATAATCCATCTCCGTGCTGGCCAG  
GCGGCGTAGCGTAACTCAAGTGAGGAAGAGGGAGGAGACGGAGCTGGAGAGAAACGCTCCATATGCTTGTGGGTGCGGC  
ACAAGCAACGGCAGCTGCTGAAAGCGTGCGACCGAGCGAACCTCGCCACTGCCCCCTACGCGCCGACCCCCACATGCCT  
CGGCGACCATCCCGTCTGCTCTCTCTTGTCTTCCCAGTAGCAAGCGACCGAACGCGCGGGGGCGCATGCCGTGACCTC  
GCCGTGCGGGGCGCCGCGCTCTCGGTTGGAGGAAAAAAGTCGTGCGCTTTTCCGGTTCCCGCGGTGGGTTCTTGATCGAG  
GCGGTTGTGATCGATAA

>SsLRR-RLK338

CCCTAACATGTTTGCCGTCGCTCATGTGATCGCATTTTAACTTAATAAGGTTTCTATTTTTCATGCACTTGTGGTCTGTTGTT  
GGATGACATTGACTAGTACATACTACTATTTTTTTTTTTTGGAAAAACTAGCAGGAGCACTGCTATATCATATAAGACGGAA  
GCAAAACCAAGTTACAACAATTTGGTTCTTACATTATTAAGACCACCAAGCTCAAAACAGGGAGATAAGAAAGAGGATACT  
CATGGTGGTAACTTAATTTCCCAAAAGCTTTACTGAAGAGCCACCATCTCTTCTTGTATCAGCCCCAGTACTTGGGCGGGCGT  
TCTTGTGTGCCCTCGAAAGGTCTCCGGTGGCGCTTTTCCAGATATCCAAGTCGAGTACATCAAGTCGACACTACTACTA  
CTAACGCAAAGCTAATTTGAGATAATAAATACTAACGATATAGCAAAAAAGGAACCTTGGTTTTTTCAGTTTAGGTGACAAAC  
GTATAAATTCAACTAGAACATATAGCAAAACGTTATCTTAATACTCAGTAGTTCTAAGTTCTTTTTTTTGGAAAGTAAATGG  
CAACTAGAACATAAAAGTTTCAGATTTTCACTAGCACCTAATCCTTTTTCTGTACTTTCCAGCGGGGTTGCCACCCTTCTGC

ACGGTTAAGTTGGTAGTAATATTTTATCTTTCTATAGGTATTATACTAACCTTACACTCCTTTACTGCATGTGCCCTCCCC  
TAAGATTCTGTCTTATTCTACCTCGCTCATTTTTCTTTAACCCGGACACTCCTCTGATGCCTATGATTGAGTTCACAGACAGT  
AATAAGAGTTTGCCGGTCTCTGTATTTTATTTGGACTCCTTTTCGGTTTCTCTGGAAAGTTAGGCATGTGATGCGAACATGCATG  
CTCTCTGAACCTTGGAAATTAGTACCACACAGAAGGAGAAGGTGCAGAAACAGTAAATTGAGCATATGAATTTTTTTATTAATT  
TGCATATGGTTGATGTACCACTACCACCCTGTCTTGCAGTGTTTTAGTTCTCATCCATGTGAATTACTAATAGAGAGAAGCTTA  
GTGTGTGTGGCTAGTGGCTAGACTGCTAGACCTCCCAAAAGTTAATCCTCTGTCCATGTGCAAGAGCACAATTCTCTGT  
CGGATGATTGCAAGTAATACTACTCAGTAGTTGAATTATATGACAGAAACACTTAAATTTTTGAGTATAACATGCTGCATGAGAT  
TTTCTTAACACAGATAGGAACATTGCCTCAACGCAATATACGCACAGTACAACCTACCTGTGGCAGACTGCTACCGTAAGTTTG  
TGCAGATCTGAGACAAGTGCAGGGAAGATGAACGCAGGTTAGATCTAGAGGGATTGATTTATACAGGAAATGTTAGCCA  
GATCATCGGTGTGAGAGAGGTTGCATTACCAAGATCACAGAGAGCATGTTACCTGCAACACTACTGCTGATTTTCTCTCA  
TTGCAGTTGGCACTTATGTATCTTTTCCATCGTCAGAAAGTAATACGCCGGCACAACAGTGAAGTTCAAGAAAAACATG  
CATTGAGGTGTAGATTGATAAAGCTTGAGGGATGACGATCCAGCTTTGACTTTGATAAAAAAAGAAAGTGTGATTTGG  
TGTGGATATCATTTCTACTGCTGTACAGTGCAACAAATTTATATTCTTTTAAAGTTTTTTTTTTCACAGAAGCAGCTCTGAA  
TCAGTGCAGATGGACAGACCATCAGAAACATTTAGAAGGTAAACACCCAGAGCCCAGAGGAGAGCATGTGAATTAAGTAGT  
AAACAAACACCAGCAGCAGCCGTGTCAACTTCTGAGTTCTGACCACCCTGCATTAGTGAGTACAAAAGAACAACTTTC  
ACAGGCGCTAGAAACACTATACTTAACAAAGGATAAAGTTTCAAGATTTTCAAGATTACCCAGGGAATTACGATTAGCATTTCCCA  
GAACCCA

>SsLRR-RLK320

TAATATTTTATTTTATCTTTCTATAGGTATTATACTAACCTTACACTCCTTTACTGCATGTGCCCTCCCCCTAAGATTCTATCTTAT  
TCTACCTCACTTGCTCATTTTTCTTTAACCCGGACACTCCTCTGATGCCTATGATTGAGTTCACAGACAGTAATAAGAGTTTGC  
CGGCTCTGTATTTTATTTGGACTCCTTTTCGGTTTCTCTGGAAAGTTAGGCATGTGATGCGAACATGCTCTCTGAACATTGG  
AAATTAGTACCATACAGAAGGAGAAGGTGCAGAAACAGTAAATTGAGAATATGAATTTTTCTATGAATTTGCGTATGGTTGAT  
GTACCCTACCACCCTGCTTGCAGTGTTTTAGTTCTCATCCATGTGAATTACTAATAGAGAGAAGCTTTGTGTGGCTAGTGG  
CTAGACTTGTAGACCTGCCAAAAGTTAATCCTCTGTCCATGTGCTCAAGAGCACAATTCTCTGTCCGATGATTGACATTTATGT  
TACTCAGTAGTAGAATTATATGACAGAAACACTTAAATTTTTGTAGTATAACATGCTGCATGAGATTTTCTTAACACAGTTAGG  
AACATTGCCTCAACGCAATATATGCACTGTACAACTACCTGTGGCAGACTGCTACCGTAAAGTTTGTGCAGATCTGAGACAAG  
TGCAGGCAAAGATGAACGCAGGTTAGATCTAGAGGGATTGATTTTATACAGGAAATGTTAGCCAGATCATCGGTGTGAGAGA  
GGTGGTATTACCAAGTACAGAGAGCATGTTACCTGCAACCTACTGCTGATGTTTTCTCTCATTTGACATTTATGT  
ATCTTCTTTCCATCGTCGGAAGTAATACGCCGGCACAACAGTGAAGTTCAAGAAAAACATGCATTGAGGTGTAGATTTGA  
TAAAGCTTGAGGGATGATGATCCAGCTTTGACTTCGATAAAAAAAGAAAGTGTGATTTGGTGTGGATATCATTTCTACTGCT  
CTCACAGTGCAACAAATTTATATTCTTTTAAAGTTTTTTTTTTCACAGAAGCAGCTCTGAGTCACTGCAGATGGACAGACCAT  
CAGAAACATTTAGAAGGTAACACCCAGAGCCCAGAGGAGAGCATGTGAATTAAGTAGTAAACAAACACCAGCAGCAGCC  
GCTGTTAACTTCTGAGTTCTGACCACCCTGTATCAGTGCAGTACAAAAGAACAACTTTCACAGGCGCTAGAAAACACTGTAC  
TTAACAAAGGATAAAGTTCAGAATTTAGATTACCCAGGGAATTACGATTAGCATTTCTTAGAACCCGAGGAGGAAGAAATG  
TTCTCACTCACTCTCAACAGAGCATGGGCACAGCAGCAAGCAATTAACAATTACAGGATCACCAATGGCAATAATGAGT  
ACATCAACTAGGGATAAACATATCCAATGATGGCATCAGCTGGGCTCCATACATGCCATCTTCTCTCCATCTTCTTTCTTCCC  
CCACACTTCAATTGAAATTTGCCAATATTCCTTTCTGATCTGAACTTCAAGAACCAAAATTTTGACATGTATTTCCAAAGTAGA  
AGTAGAAGAACCACTCACTTACACACATCACTGTATCTAGGAATGCGAGACCAATTGCGCTATCGTCCCGTAAAGACGGC  
TTCAAGATTTGTGCCAGAGTGAAACCACACTCGCTGATTTTGTGTGTGTCAGCAACCAACCAAAATCTCAGCGGTGTGTGCA  
GTAGGATCTATGGCTAAAGAGTAGAGAGTAGAGAGTGGAGATAGTACAAGTCACTGTACCTAATCAAATCTGTTGTTTATCTA  
AAAGAATATCTGCAAAAGCTAAGCTGTTGTTTCAATATTTCAATTGGATCCAGATCTCTAAACCCTTTGCGTGCTATAAACAA  
ATCTGGGGTCTCCCGCTCTACAATCCCAAGGCAACGAGGAGGTGCCAGTACCACCCTACCCCGCGGCTCGGCCACTC  
TCTGCTCCACCA

>SsLRR-RLK307

GCACGGTTAAGTTGCTAGTAATATTTTATTTTCTATCTATAGGTATTATACTAACCTTACACTCCTTTACTGCATGTGCCCTCCC  
CTAAGATTCTTATCTTATCTACCTCGCTCATTTTTCTTTAACCCGGACAGAGGACACTCCTCTGATGCCTATGATTGAGTTCA  
CAGACAGTAATAAGAGTTTACCGGTCTCTGTATCTATTGGGCTCCTTTTCGGTTTCTCTGGAAAGTTAGGCATGTGATGCGAA  
CATGCATGCTCTCTGAACCTTTGGAAAATAGTACCACACAGAAGGTGCAGAAACAGTAAATTGAGCATATGAAATGAATTTGC  
ATATGGTTTATGTACCACCCTGTCTGCATTTTTTAGTTCTCATTTCTATGTGAATTACTACTAGAGAGAAGCTTAGTGTGTGTG  
GCTAGTGGCTAGACTATAGACCTCCCAAAAGTTAATCCTCTGTCCAAGATCACAATTCTCTTGTGCGATGATTACAGTAATAC  
TACTCGAATTATATGACAGAAACACTTAAATTTTGTAGTATAACATGCTGAATGAAATATCTTATCAGATAGGAACACTG  
CCTCAAGGATAATATGTAGTTATGTACAGTACAACCTACTTGGCAAACTGCTACCGTAAAGTTTGTGCAGATCTGAGACAAG  
TGCAGGGAAGATGAACGCAGGTTAGATCTAAGAGGGATTGATTTTATACAGGAAATGTTAGCCAGATCATCGGTGTGAGAG  
AGGTTGCATTACCAAGACCACAGAGAGCATGTTACCTGCAACACTACCGCATGATTTTCTCTCATGTGCAGTTGGCACTTAT  
GTATCTTCTTTTCCATCGTCAGAAAGTAATACGCCGGCACAACAGTGAAGTTCAAGAAAAACATGCATTGAGGTGTAGATTT  
GATAAGCTTGAGGGATGATGCCAGCTTTGACTTCGATAAAAAAAGTGTGATTTGGTGTGGATGATTTCTACTGCT  
CTCACAGTGCAACAAATTTATATTCTTTTATTTATTTTTTTCACAGAAGCAGCTCTGAATGACTGCAGATGGACAGACCATC  
AGAAACATTTAGAAGGTAACACCCAGAGCCCAGAGGAGAGCATGTGAATTAAGTAGTAAACAAACACCAGCAGCAGCCG  
CTGTTAACTTCTGAGTTCTGACCACCCTGCATCAGTGCAGTACAAAAGAACAACTTTCACAGGCGCTAGAAACACTGTACT  
TAACAAAGGATAAAGTTGAGAATTTAGATTACCCAGGGAATTACGATTAGCATTTCCAGAACCCGAGGAGGAAGAAATGT  
TCTCACTCACTCTCAACAAAGCACTGGGCACAGCAGCAAGCAATTAACAATTACAGGATCACCAATGGCAATAATGAGTA  
CATCAACTAGGGATAAACATATCCAATGATGGCATCAGCTGGTCTCCATACATGCCATCTTCTTCCATCTTCTTTCTTCCCC  
CACACTTCAATTGAAAAATTGCCAATATACCTTTCTGATCTGAACTTCAAGAACCAAAATTTTGGACATGATTTCAAGTAGAA  
GTAGAAGAACCACTCACTCAAACACATCACTGTATCTAGGAAATGCGAGACCAATTTGCGCTATCGTCGCCGTTAAACCGGCT  
TCAAGATTTGTGCCAGAGTGAAACCACACTCGCTGATTTTGTGTGTTAGCAACCAACCACAAATCTCAACGGTGTGTGCAAGT  
AGGATCTATGGCTAAAGACTAGAGAGTAGAGAGTGGAGATAGTACAAGTCACTGTACCTAATCAAATCTGTTGTTTATCTAAA  
AGAATATCTGTCAAAAAGCTAAGCTGTTGTTTCAATATTTCAATTGGATCCAGATCTCTAAACCCTCTGTGTGCTATAAACAAAT  
CTTGGGGTCTCCCGCTCTACAATCCCAAGGCAACGAGGAGGTGCCAGTGCCACCCTACCCCGCGGCTCGGCCACTCTC  
TGCTCCACCA

>SsLRR-RLK127

AATATTGGTATTACTACTAAAGAGAGTTGTTTTACATAGTTGACTTGAAATCCAGAATTTCACTGATACATGCTAACAAAGTCA  
TAAGTAACATGACTAGTTCTAACAAAACAGGCAAAATAATTGGAGCCTCTTTGGTTGAAATTCAAATTTTGGAACTGGAGAG  
CCATTTCATCCCCAGTAAGATTCGGAGTGAACTTTCATCTGAATTAATGAAATAAAAAAGGTGGCGGATAATTGATCTGAAA  
AAATGGAAACACAAATGTACGAACAATAATTGTATCCACCAAGCAGTGGGCAACACATCTCTTTCTCTTTCAAGG  
ATTGTGCATTGCCATTCGTGCTTTTAAAGTAGTATAAGTTTGATGTGGAATGTGTGTTTAGTTACCAAAATTAAGGGATCT  
ACCAGCCATGGTGATGCTAAGCTAAGATAGGTCATGAATTAACATGAAACCATAGGGTGGTTATCTTAGTATCTTATTC  
CTCATTTGCTCTTCCACTCAAAAGACATGAACATGTTCTCAAAATTTTATTTCTATCACCGCTCATCCAATCTTTTCAGTTAC  
TTTCCAGCGATTTGCCACCTATTCACATGGGTAAGTTGCTGAAAGTTTTTTTATGCCTTTGCAATTGTACTAACCTTCACCCCT  
TCTCTTACCGCCATGTGCACCCTAAGATTCCTCTTATTTCCCACTCTTACCCTCTTGTTTAACTAGCAGGCTCTCTCTGAT  
GCCCATGACGAGTTACACTTCAAAGGAAGCAATTAAGTTGCCAATTCTAGTATCATGGTGATCTCCTTTTTGCAGAACTTG



ATCATGTGACTGAACATTCTGGGGCTCACACAGATTACCCGTTACTGAGCTGCAGAAGACTAATTTAGGATCACTCATTGAT  
GCGCACAAACTGAGAAGTACATACAAATTACAATGCCTGAAAAGAGGATGTAATAGTATTTTTGCAATTATTAGTAGCAAGTC  
CAGAAAAGATTAAAGTCTCAGGGACTGTAAGTATTGCAAGTTGTCAGGGCAATGATGAATGCAGGTAGTGGTAAAGCAAATTGTC  
AACATTAAGACTTCAAATGTTGAATTAGCATCGAAAGATGCAATTTTTTACAGCTGTAGTAGACTTGCAGCAAGGAGGATAC  
CTGCAGAGAAGTAGTTACTTGTAAAGAGGTAGTACCTGTAAAGCAGCACTGTACAGGGCTCACAGCAGGGTAACCGTAAAG  
CAGCACTATCACAGCAGGCCCTTCAGAAAACGTTTTAGAAGCTTACATATGCCGAAAGCCAGCAGCAACAGCCACTGTCAAC  
TCCTGTACCAACGGTACAAAGGTTACAGGGATTAAGAATAACTGACAGTGCATGCAAAATGCTCTTCCATGGAAACATTGGATA  
AAAGTCCGATTACCGAGAGAATTAGCATTAATCTGTTTTTCGCAGAACACGAGGAAGAGATGTTTTACCTCCAAAGACAGCA  
GCAGCAATTAACAATTCAGGCTGCAATGGCAGTAATAAGTACACCAACTGGCGATAAACATACGCAGATCATGACACCAACC  
ACACCGCCTTCTCTCATCTTCCCCGTCAC TAGCACAAAGTGCACAACCTGCATCCAGTATCCATTTTCTGATTAAATACTAAAT  
CCAGTACAATTATTTAAGTGTTTCAGGCCAAGATCCAATCAAGCCTGCTCTTTAGTAGCAGCAGCACACTGTACACACAAC  
ACTGCAACAATCAATCGAAAATCTGTTCTTTTGTGTTGGATTTTTTGGAGGGGGCAAATTGCAGCAATTGTTCCGGTGCCTATT  
TGGATCCAGATCTCTGTGCTTTCCCTGTATAAAACAATTCATTGGGTCTCCCCCTCTACAATCCCAATGCTTGCAGAGGGCGC  
CACCTCACAAAGCCAGCATCCACCGCATTGCCGCCCCCTCGCCTCTCCTCACGTACCCGCGCCCTCAGCCTCGCCACC  
GAGGCGCGCCGCCAA

>SsLRR-RLK87

CAAAACAGGCAAAATAATTGGAGCCTCTTTGGTTGAAATTCAAATTTTGGAACTGGAGAGCCATTATCCCCAGTAAGATT  
GGAGTGAACATTTTCTGTAATTGAATAAAAAAAGGTGGTGGATAATTGATCTGAAAAAATGGAAACACAATGTACGAA  
CAATAATGAAATAATTGTATCCACCAAGCAGTGGGCAAACATCCATTTCTCTTTTCAAGGATTGTGCATTGCCATTCGGGCTTT  
TAAAAGTAGTATAAGTTTGATGTGGAATGTTGTTTTAGTTACCAAAATTAAGGGATCTACCAGCCATGGTGATGCTAA  
GCTAAGATAGGTCCATCGAAATTAACATATGAACCATAGGGTGGTTATCTAGTATCTTATTCCTCATTGCCCTACACCAAG  
ACATGAACATGTTCTCCAAAAATTTATTTTTATCACCGCTCATCCAATCTTTTCAGTTACTTCCAGCGATTTGCCACCTATTC  
ACATGGGTAAAGTTGCTGAAAAGTTTTTTATGCCTTTGCATTGTACTAACCTTCACCCCCCTCTCTTACCGCCATGTGCACCCTA  
AGATTCTCTCTTATTCCCTACTCTTACCCTCTTGTGTTAACTAGCAGGCTCTCTCTGATGCCATGAAGGCGATTCACACTTCAA  
AGGAAGCAATTAAGTTGCCAATTCTAGTATCATGGTGATCTCTTTTTTGCAGAACTTGATCGTGTGACTGAACATTCTGGG  
GCTCACACAGATTTACCCGTTACTGAGCTGCAGAAGACTAATTAGGATCACTATTGATGCGCACAAACTGAGAAGTACAT  
ACAAATTACAATGCCTGAAAAGAGGATGTAATAGTATTTTTGCAATTATTAAGTAGCAAGTCCAGAAAAGATTAAGGTCTCAGG  
GACTTAAGATAAGTACTGCAGCATGCAAAATGCTTGGTGGTAAAGCAAATGTGAACATTAAAGGCGATGTTTACTTCAA  
CTTCAAAATTCAAAAATTTTACAAGATTTCCCGTCACATCGAATCTTGGACGCATGCATGGAGTATTAATGTAGGTAAAA  
AAAATAACTAATTGCACAGTTTGTCTGTAAATGTCGAGACGAATCTTTGAACCTAGTTAGTCCATGATTGGATAAAATTTTACC  
AAATAACAACGAAAAGTGCTACAGGAACCTTTACACCCACTTTTACACCATCTAAACACTACCTAAGACTTCAAATGTTGAAT  
TAGCATCGAAAAGATGCGATTTTTTACAGCTGTAGTAGACTTGCAGCAAGGAGGATACCTGCAGAGAAGTAGTTACTTGTAAA  
GAGGTAGTACCTGTAAAGCAGCACTGTACAGGCTCACAGCAGGGTAACCGTAAAGCAGCACTATCACAGCAGGCCCTTCAG  
AAAACGTTTTAGAAGCTTACATATGCCGAAAGCCAGCAGCAACAGCCACTGTCAACTCCTGTACCAACGGTACAAAAGGTT  
AGGATTAAGATAAGTACTGCAGTGCATGCAAAATGCTTCCATGGAAACATTGGATAAAAGTCCGATTACCGAGAGAATTAG  
CACTAATCTGTTTTACAGAACACGAGGAAGAGATGTTTACCTCCAAAGACAGCAGCAGCAATTAACAATTCAGGCTGC  
ATGCGCAGTAATAAGTACACCAACTGGCGATAAACATATGACAGATCATGACACCAACCACACCGCCTTCTCTCATCTTCCCG  
GTACATGACACAAGACTGCATCCAGTATCCTTTCTGATTAAATACTAAATCCAGTACAATTTTAAGTTGTTTCA  
GGCCAAAGATCCAATCAAGCCTGCTCTTTAGTAGCAGCAGCACACTGTACACACAACACTGCAACAATCAATCGAAAATCT  
GTTCTTTTGGTGTGATTTTTTGGAGGGGGCAAATTGCAGCAATTGCTCGGTGCTCATTGGATCCAGATCTCCTGTGCTTTCC  
CTGTATAACAATTC

>SsLRR-RLK128

AGATGTACTAGCATTTTTTTAACTGAAGGAACATGATGCTTAGGATCAGATCTTGGCTTCAGCCAGACCTGAGAAATGTCATA  
CTGTGCAGAGAACTAACGGAAAGAATTAGCTGTCAAAGAAGCTGTGCCTCAGTACTTTAAGAAGGTACAGGGTTATCCTAATTAA  
CCCGGGAACAAGTCTGTTCAAACCTTAACCATGTGCTCCCTGCCCTGCTTGTCCACTACCCGCGCCCTGATGGGATCTG  
AATCCAAATCAACCCCATATTTCCCTTGATGTTTACCACCACCCCATATGCTCCAACATTATCAACCATGTGTGGTACCTAACA  
TGTCCTCGGGCTGTGCCATCATCACCATGTGGCCACATTCTAACCTCGAGTTAAGCGCGAATGACGGTTGATTGGCATGACT  
TGTTCAATTTGTTTGAATTTAATATTCGTATTGCTACTAAAGAGAGTTGTTTTACATAGTTGACTTGAAATCCAGAATTTCACTGA  
TACATGCTAAACAAGTCACAAGTAATATGACTAGTTCTAACAAAAACAGGCAAAATAGTTGGAGCCTCTTCAAGTTGAAATCCAA  
ATTTTACAACCTGGAGAGCGTTTATCCCCAGTAAGATTTCGGAGTGAACATTTTCTGTAATTGAATAAAAAAAGGTGGTGGAT  
AATTGATCTGAAAAAATGGAAACACAAATGTACGAACAATAAGTAAATAATTGTATCCACCAAGCAGTGGGCAAAAGTATGCAT  
TTCTCTTTTGAAGGATTGTGCATTGCCATTCCGGCTTTTTAAAGTAAGTAAAGCTTGATGTGGAATGTTATTTAGTTATCAAAA  
ATTAAGGGATCTACCAGCCATGGTGATGCTAAGCTAAGATAGATCCATGGAATTAACCTATGAACCTAAGGGTGGTTATCT  
TAGTATCTTATTCCTCATTGTCCCTTCCACTCAAAGACATGAACATGTTCTCTCTCCAAAAATTTTATTTTATCACCGCTCATC  
CAATCTTTTTTTCAGTTACTTTCCAGCGATTTGCCACCTATTACATGGGTAAGTTGCTGAAAGTTTTTTTATGCTTTTGCATTTGTA  
CTAACCTTACCCCTTCTTACCCTATGTGCACCCCAAGATTCCTCTCTTATTCCCACTGTCTTACCCTTTTGTGTTTAAAC  
AGCAGGCCCTCTCTGATGCCATGATGAATTCACACTCCACCGGAAGCAATTAAGTTGCCAGTTCTAGTATCATGGCGATCT  
CCTTTTTGCAGAACTTGATCATGTGAGTGAACATTCTGGGTCTCACACAGATTACCCGTTACTGAGCTGCAAAAAGACTA  
ATTTGAGATCACTCATGGATGCGCATAAACTGAGAAGGGCATACAAATTACAATGCCTGAAAAGAGGATGTAACAGCAGAA  
ATAGTATTTTGCAAATTGTTAGTAGCAAGTCTGTAAAGATTAAAGGTCTCTGGGACTGTAAGTATTGCAAGTGCAGGCAAAAGA  
TAGATGCAGGTAATGTAAAGCAAATGTGAACATTAAAGACTTGAAATGTTGAATTAGCATCGAAAGATGCATTTTTTACAGCT  
TTAGTAGACTTGCAGCGAAGAAGGATACCTGCAGAGCAGTAGTTACCTGTAAAGAGGTACCCGGAAGCAGCACTGTACACA  
GGCTCACAGCAGGGTAACCGTAAAGCAGCACTGTGCGCAGCAGGCCGTGCAAAAACGTTTTAGAAGCTTACGATCCGCTAAA  
GCCAGCAGCAACAGCCACTGTCAACTCTGTACCAACGGTACAAAGGTTTCAGGGATTAAGAATAACTGACAGTGCATGCAA  
AATGCTCTTCCATGCAACATTGGATAAAAGTCCGATTACCGAGAGAATTAGCACTAATCTGTTTTACAGAACACGAGGAAG  
AGATGTTTTACCTCCAAAGACAGCAGCAGCAATTAACAATTCAGGCTGCAATGGCAGTAATAAGTACACCAACTGGCGATA  
AACATATGCAGATC

>SsLRR-RLK180

CTCATCTAACCAAGGACATGTGCCGCCCTCCATCAATGGGTGTAGATCTGATCCTTTTGTGTTAAACATCCGGAGCAGAACTGTA  
ACAGTGAGAAAAGTCTGTGATTGTTAATGGTTACTGCATGAAGGAGCTGTTATGCGTGCCGCGTGTACTACCACTTCACCC  
ACTTCAGCTGTGATGCGCCCTTTTACTTTTGTGTTTCTTACCCTTTTACCTTTTCCGGTTTCAACTCTTGAGATTCTTGCTTCGG  
CTGCTTGCCATCCTGTAGTGCTGTAATCACAAGTTTATATGTGGGGTGGTTTAAACAAAGGTGATTTTGCAGAAATGTAAGT  
GCTTTTGGAACTGAGCATAAGTAATAAGGAGGTAGATGGAGGATTGTTTGCTATGATCTTTTTTTTTTCTTTTGTCTTGTAT  
CCCTCTGTTTCAAATTTGTAAGTTGTTGTGGCCATTTAGAAGTCTCTATAAAAAGACATAGGACATGTTTAGTATAAGGGCTA  
ATTATTAGCTAGCTAAAAATTAGCCTTAGCTCATCTAAATAGAAGAGCTAATTTCTATCTAGTCTTTAACTAGTTGTTGGGTAA  
CTAGTTAGCTGGCCAACTCTAGCTAATTCAGTCTAATTTTAAAGCCAAATTAGTAACCAGCCCTAATGATTTAAACATGCGCTGT  
ACCGATTAAAGTAAAAAATGGGCTACAAACTACGGCCGAAGACATAAAAATTGTAGGCAGATGGAGGGAAGGATTAAGTCTG  
CACGTGTTGGTGGCCATGTTAGGCTATCCGCACTCATGGTCTCTATATTCTATCTCTATATATCCTAGTCAGCAAGATTCTTTC  
CTCTATACTTAATCTTCCGCACCATCCATCCTCTATATCATCTCTATCTACTGTGGGACTCACTTGTCACTTTA  
TCTAAATATATCCATGAGTGATCTAGTTTTGAAGGATTTATTGAGACAAATTTAATGGTGAATCGAAATTTAATTTGGATTTTT

TCGGTGAGTGTGTTCTCCTCAGTCTAGTCAGTCAGAGTTTGTAAAGTAGTAACTCATTGATCTCATGGACTACAGATTGTTCTA  
TTCAACTTTAGTCTCTGTATATGTATGCTATCAGAGTTACACGGCACTTATCTCTGTACATCTATTCTTTTTACTGTAAACACCG  
AGCAGGAGTTTGTACCAATAACCTTTTCAGGTAACCAACACGACACTGCAACAGAAGTTCTACTTCCAATGTAAATCCCTCG  
AAGTTCCATTATCTTCTACCGGATCGGGATCAGTAACGCTGCAGTGCTTACTACGAAGACGCTATTACCAATGGGAATTTGG  
AGAGGCAGGAAGGTAGATCTAGATGCGTGTGCCTGCAAAATTTCTCGCCCTTTTGCCAGTATATATATTTGATCTGCTGGATG  
GCGGCTTCTCTGCAATTAACACTCAAGTCAAGGGGGCAGTAATTAACAAGTATTTGACAGTGAAGGCAAGATTAGATC  
TAACCCAGGGCAGTGTGACAGCAACTCCATTGAGGGGTTTGGATCCCATCTCGACTGTTTAATCCGCCAAGGAACAGGCTCTG  
GCATTGGGGTTTTTATTATTGTTACTGCATGGAATGAACTGGTTCATTACTTCTGCCATGTGTTACCACTGGGTCAACCAGC  
TGTGATGTCCTCTTTATTCTCTTTTAAACCTTCAACTTTGGAGATTTCTACTATCAAGTGTGTTCAATTGTCAACCCTGCAATG  
GTTGTAAATCAGTGCAGGACATACGTGGTTGTTTACCCCATGACTTTTAAGCAATAGCCATAATTTGATATGGTACTAAACATGCA  
TTTTTCAGTATTTCCCAAGTATCTGAAATGACTGAGAAAAATTGTTTTACATGCATTCAAATTTTCAAACAAAATATATAAGT  
ATGTTCTAACATGAATGAAATCAACCTGTATCTGCCTCTTGATCAACTGAATATGTTCTCTACTGTTTCCAGCAAATTTTACT  
GACTGTATTTCTGAATTAATACTTCAAAGCTTCGGGATCTGCAAGGTATGTTGCATGGAATGACAAAACATTCGATGA  
CCCTGATGGATGTATCCTTTTATTTCATCTCCAATTAATCCAAGTTTCAGCTCTCGTCATTCTCTGTGTTCTTCAATTGTGACCC

>SsLRR-RLK388

>SsLRR-RLK193

>SsLRR-RLK367



AATGGTAGACAAAGAGGGGGAGAGAGAAAGAACAAGTACTCTGCTACTGCAGCGAGGGTTTCGAGGAGCCCAATTGCTG  
CGTCGTTGCGTTGATGCAAGCACCCATTTCATCGTCCACCTCTCTGCTGCTGCCTGCCTGCAACAACCAACCAACCAAG  
CAAGGAGCAGGACCAAGCAAAACACCTTTGAGGGTTTTGAGGAAAGAGAGAGACTGTGACAGTGTGCGAGCTGAGCTGAG  
CCTCCTCGTCTCCCTCCTCTCCTCCGCTCCGATCCCCCGCACTCGCTCTGCATTGAATCCATTCTCTTCTCCGCTCCATTG  
AGATCATCGCCAGGGCCAGCCAGGGCAGCAAGCAAGCAGCCTTGCTTGGTGCTTGGTGCCATTGTGCACCGCCCGAGGCC  
AGCCCCAAACACCGCGCGCGCACTTTTTTC

>SsLRR-RLK282

TTCAAACATAAAAAAGTGATTGGAGCTAGCAATATGAAATAAAATAGCCATATACAACATGAATTACATATGGTGCTGCTAAA  
ACATAGGAGGATGAAGCTAGCAACCTTTCAAACAACACCGACGACGGCGTAGAAGCGTTTGAAATGGATTGATCGCCGGAGA  
TAAGACGAGCAAAAAACAATGGAAGAACAGGCAACAAGAACATGAACAAGGAAGGGCTCGGGCAGAGAGGAAGAAGAGG  
GAGGTTCAATTTATAGGGGGAGGTTTTAATCCCGGTTGGTAACACTAACCGGGACTAAACCCAGTCTATAGTCCCGGTCGG  
TGCACGGACCGGGACAAAACTGTAGTCCCGGTCGGTGGCACCAGCCGGGACTAAAGGCAGGGCTTAGTCCAGGTTGGT  
GTTACCAACTGGGACTAAAGGTCCTCCCGACAGCGCTGACAACAGAGCCGTTGGCGAGGGACCTTAGTCCCGGTTGGT  
AACACCAACCGGAACATAAAGTCTATTTAGTCCCGGTCGCCAAAATCGCCGAGACTAAAGACATTTTGGCGGATCAACGAA  
AGGTACGTTGTGTAGTAGTGTGGGGATGAACTCTTTTGCACGTGTTTCCAAAATCTGGATGTATTGGAAACAGTGACGTGAA  
ATCCCCACTGAGACTGGCCTAAGAGTGCACGTAGGAATCAACAATTGTGCATTGAGAATGGGAAATGTATTTATGAGTTTTT  
TTTATATCTAGTAAGTGGTTTCAACTGTGACCGGGTCGCTATTGAGAATTAGCAAATTTATCAAAAAATGCTGATCGCCGAA  
CTTCAGGTAGTTTATTATCAACAAGTTTGCCATTCTAGACCGGCAGTTAATTTGTACCCATTCTTTTAAAAAAAACCAAGAT  
AGCATCGGGTTTAAGCTAGTGAAATAATTGTGGGTATCTACTGCCTTACAATGTTTTATGTTTACCTAAAGTTGTCTGTAGTCGT  
AGTAATTGATGAGAGTTGCCGGATTGAAAGGAGGCGCTGAGGCTTCTACTATTTTTCCCTCCACGAGCATGCATATTGCATCC  
ACATGCGAGGGCTGGAAACGGTGTTCATTATCTAAAAACAACCAAAATACATATTGCATACATAGAAAACTTGTGTAACCT  
GTGATAGCATTACGTTGCAATTTGCTTATTGTCATGTAAGTACGTACAGAAATTAATAAATAAAGCACAGTAGTGGCTA  
GCTGAAGGGCATGCACAGCAGCACCAATCTAAGGCCCTGTTAGTTCACAGAAAATTTTGCAAAAATTTTCAGATTCCCCGT  
CACATCGAATCTTTAGCACACATTAATATAGATAAAAAATAAATAAATACAGAGTTTAGACGAAATGAACAGACGAATCT  
TTTAAACCTAATTAATCATAATTGGACAATATTGTCAAATAACAACGAAAAGCGCTATAGTGTCAATTTTGCCAAAAATTTG  
GATCTAAACCAATCTAAACTAATGTGTGCCACACTAATTTCTTTCCCGCGCGCTCTCCGATGCGCGCGCACCACCACCAAA  
CAATGGGTAGACTACTGCTGCGAGGGTTTCGAGGAGCCCAATTGCTGCGTCGTTGCGTTGATGCAAGCACCCATTTCATGTC  
ACCTCTCTGCTGCTGCTGCAACAACCAACCAACCAAGCAAGGAGCAGGACCCAAAGCAAAACCTTTGAGGG  
TTTTGAGGAAGAGAGAGACTGTGACAGTGTGCGAGCTGAGCTGAGCCTCCTCGTCTCCCTCCTCTCCGCTCCGATCCCC  
CCGCACTCGCTCTGCATTGAATCCATTCTCTTCTCCGTCTCCATTGAGATCATCGCCAGGGCCAGCCAGGGCAGCAAGCA  
AGCAGCCTTGCTTGGTGCTTGGTGCCATTGTGCACCGCCCGAGCCGAGCCCCGAACACCGCGCACTTTTTCATGCGCCTGC  
CGCCTTGCCATTGCCCCATCGCCAAGC

>SsLRR-RLK60

AAGCAACGGCTGATTGTAAAAGTTTGCTAGTTTCCAGCTTCTACACTATTCCATATTTCCACACTAGTCGTTTCAGAGTCACA  
CAAGTCACAGCCTTTATTTGTTAGGAAGAGCCGCACACAGCTCAGCCCATGATGATCCTTTTCAAGTGCGGCCATCTGATCA  
CACTCATTGATACCCTGTTTGCTGGAACCTATCAGCCCGGTTTAGTAGGGATGGTACAATGTTTTTCTCTCACAATAAAATAGC  
ATCAGTCGTTTTTGTAGCCGCAGAAACCATCCAGCGAAGCAGAGTACGCTGTAGTCACACAGAAATTCAGTGTCAAGTGCCA  
TGATGGATTGGCATGTGCCAGTTAATTCTGTGAAAGAAGCTGTTAGGTAAGGCCAGACCCACAGCGAGTGATTCGTCGCGT  
CAGAGATGACCCAACAATAAGATCCTGCTGGAATCTCACATAATTTGAGCTCTATACGGATAACGAAACAGCGACATCTCTT  
CAGTCCTTTACCATGTGAAAAAGCCTTGAGCCAGTCTTTATATGCCAGCATGCAAAATGTTAGTAGAATTCCTAATTTGTCATA  
AAAAAAGTCATGATCCCTTACGTACCATCACTTTATCTTTTTTCTTTTAGTTTTTCATATGCGTGCCACTTTTCATATAATAAC  
AGAGTTGACACCAACCAATGTCAACGTAATGTCAAAGGCCATACTAAATTCATCACAGCACCAAAAAAAGGAAAAAATCTG  
CAAGCACAGACTAGTACATACCTACTCCCTCAATTTGCGAGGAGTTGATTATCCCTTTTCCGAGCACCTCTAATCTAGTGAT  
TGGCCTCTTTGTCGTTGAAACTGTCTAAGTGCTCTATATTACTAGTACCAGCTGGTAACAGCCTGAGACCTGTGCGACGCA  
ACACGGTTTTCTTTGCAAAATAGGAGTACTATATCAGCGTACAGTCCGCTACATGTAGCGCACTACAGGCAATAATAAAAC  
CGGCCACTAGAAAAACACACGGTTGCCTACTCACCTGATATGATAACTGATATATTGTATAAGCATGGATCAAGTTGATGAA  
ACCACAGGACATTGACAGGCGCTAGAGATGGACCGGCCGGATGAGGAAGCCAGCGGCCAACCAAGACCACGACCCAGCAT  
AACATTTTTTATTTTTATTTTTTTTTTGGTGGTGGTGGTGGAGATGGACTACCGGATTGAAACAGATCTATGGAGCAGGCGCT  
GAAAATGTATCAGGTCTCGCCGGAGCTCCGCGGCCGTGAGGAGGGGCAACCATGCAATTGAGAAGAGGAAGAAGACAGTGAA  
GGAAAAAATCGAGTGTTCTCAGGGCCCAAAACACCCGAACGACGCAAACTCATTTTATAAACTTGAATTTACAAAATGAA  
CCTGTTGCTACAGTGACAAGAAAAGGGGAAGGACAAGTCTTTAAATCAAATATAATCAGTTTATTAGATCCCTCTACACCT  
GAAATTTATGAGTGTTTATAAAGATTGAGATGTTTATGAGCTTCTAACCAGATTAAAGGTGTTGTAATAATCTCGGGAT  
AATATTCTTTACCACACCTGAATTTTACTTACACCAATTTATATCTAAAAAATTACACCAAAATATTACCGTAATATCTAAAAG  
TTAAGTATAAATCAAATATAAAGTCAAGTATAATAATCTAATAAAAAAGGCAACTATAAAAAATTCACCGTAGATTTAGGATG  
ACGAGAGAGAAGACTTTCATTTGTTGAATCTTATTAGTCTTATTCCTCTCTATGTCATGCCATTTAGATATATAGAAGAAGAA  
AGGGGAAATGAAGAAAGAAAAAATCTGACGTGGGGGAAAAAGGAAATTTAATTTACATGTGTGTCGACCTCTCATCC  
ACGCGTTAACTCTTCAGAAGCAATGCAGTGCAACGCCTGATCACATATTCATGTGTGCTTAGCCGCTTTGCTAGATTCT  
GGAGAGGAAGAGA

>SsLRR-RLK30

CTGGGGCTGAAAGGGCTCTGGAGAAATAGTAAGCAACGGCTGATTGTAAAAGTTTGCTAGTTTCCAGCTTCTACACTATTCC  
ATATTTCCATACCTAGTCGTTTTCGAGTACACAAAGTCACAGCCTTATTTGTTAGGAAGAGCCGCACTAGCTCAGCCCATGAT  
GATCCTTTTCAATTGCGGCCATCTGATCACACTCATCGATACCTATTTCGCTAGAACTTATCAACCCAGTTTATCAGCTATGGT  
ACAATATTTTTCTCTACAAACAAAAACAATTAGCTGCTTTATCAGCCGCAGAAACCATCCAATGTAATCACACAGAAATTTT  
AGTGTCAAGTGGCATGCATGGATTGCCATGTCCAGTTTAAATCTGTGGAAGAAGCTTTAGGTAAGGCCAGACCCACAGCGAGT  
GATTGTCGCGCTCAGAGATGACCCAACAATAAGATCCTGCTGGCAATCTCACATAATCTGAGCTCTATACGGGTAACGAAAC  
AGCGACATCTCTTCAGTCCTTACCATGTGAAAAAGCCTTGAGCCAGTCTTTATATGCCAGCATGCAAAATGATAGTAGAAT  
CTCAATTTGTGCATAAAAAAAGTCATGATCCCTTACAGTACCATCACTTCTATCTTTTTTCTTTTCTGTTTCATATGCGGTGCCA  
CTTTTCATATAATAACAGAGTTGACATCAATGTACGTAATGTCAAAGGCCAACTAAATTCATCACAGCAAAAAAATAA  
AGAAAAAAGAAAAAAGTGAAGCAGAGTACATACCTACTCCCTCAATTTTGCAGGGAGTTGATTATCCCTTTTCCG  
AGCACTCTAATCTAGTGATTACCTCTTTGTCGTTGAACTGCTCAAGTGGTCTTATATTACTAGTACAGCTGCTAACGAGC  
CTGAGACCTGTGCGACGCAACACGGTTTTCTTTGCAAAATAGGAGTACTATATATCAACGTACAGTCGCGGTACATGTAGCGC  
ACTGAGGCAATAATAAAACTGGCCACTAGAAAAACACACGGTTGCTACTCACCTGATATGATAACTGATATATTGTATA  
AGCATGGATCAAGTTGATGAAACCACAGGACATTGACAGGCGCTAGAGATGGACCGGCCGGATGAGGAAGCCAGCGGCCA  
ACCAAGACCCAGCCAGCATAACTTTTTTTTTTGTGGTGGTGGTGGAGATGGACTACCGGATTGACACAGATGTCCTGGA  
GCAGGCGCTGAAAATCTACAGGGTCTCGCCGAGCTCCGCGGCCGTGGAGGGGCAACCACGCATTGAGAAGAGGAAGAA  
GACAGTGAATGAAAAATCAAGTGTTCTCAGGGCCCAAAACACCCGAACGACGACGACTCATTTTATAAACTTGAAATTAC  
AAAATGAACTGTTGCTACATTGACAAGAAAAAGGGGAAGGACAAGTCTTTAAATCAAATATAATCAGTTTATTAGATCCCT  
CTACACCCGAAATTTATGAGCGTGTATAAAGATTGAGATGTTTTAGATGAGCTTCTAACCAGATTAAAGGTGGTGAAT  
AACC CGGATAATATCTTCAACACACCTGAATTTTTACTTACACCAATTTATATCTAAAAAATTACACCAAAATATTACCGT  
AATCTAAAAGTTAAGTATAAATCAAATATAAAGTCAAGTATAATAATCTAATAAAAAAAGGCAACTATAAAATTCACCGT

AGATTTAGGATGACGAGAGAGAAGACTTTCATTTGAATCTTATTAGTCTTATTCCCTTCTATGCATGCCATTTAGATATATAGAA  
AGAAGAAAGGGGAAATGAAGGAAACCAAAAAATTTCTGACGTGGGGGGGAAAGATTTTCACATGTGTGTCAACCTCTCTAAT  
CCCACGCGTCAACTCTTCAGAAGCAATGCAGTGCAACGCCTGATCACATATTCACATGTGTGCTTAGCCGCTTTGCCTAGAT  
TCTGGAGAGGAAGAGA

>SsLRR-RLK13

ATACCCCGCCATGATGGGTGGCGGGTTTGGCGTACCCCGCCACCCATCATGGCGGGGTACGCCCCGGGTGGCGGCCACGTC  
ACCCTGCCACGTGGGATGTGTACCCCGCCACCATGCATGGCGGGGTTCAGTGCATTTGCCCGCCATGCATGGTGGCGGGGG  
CAAACAGGTTAGATTTAAAAAAATTTCAAACAAGGGTTAAATTTAAAAATTTGTTTCAAATTTGGGCTAAAAATAAAAAAA  
TTCCACATAATCTGAGCTCTATACGATAACGAAACAGCGACATCTCTTCAGTCCCTTACCATGTGAAAAAGCCTTGAGCCAGT  
TCTTTATATGCCAGCATGCAAATGTTAGTAGAATTTTCAATTTGTCTATAAAAAAAAGTCATGATCCCTTCACGTACCATCACT  
TCATCTTTTTTCTTTTCGTTTTTCATATGCGTGCCACTTTCATATAATAACAGAGTTGACACCAATGTCACGTAATGTCAAAG  
GCCTAACTAAATTCATCACAGCACCAAAAAAAGGAAAAACTTGCAAGCACAGACTAGTACATACCTACTCCCTCAATTTTG  
CAGGGAGTTGATTATCCCTTTTCCGAGCACCTTAATCTAGTGATTGACCTCTTTGTGTTGAAACTGTCCTAAGTGCTCCT  
ATATTACTAGTACCAGCTGGTAACAGCCTGAGACCTGTGCGACGCAACACGGTTTTCCTTTGCAAATGGGAGTACATATCAA  
CGTACAGTCGCGGTACATGTAGCGCACTGCAGGCAATAAATAAACCGGCCACTAGAAAAACACACGGTTGCCTACTACC  
TGATATGATAACTGATATAGGCAGTGTTTACTTCCCTCAAAATTTCAAAAAATTTACAAGATTCCCCGTACATCGAATCTTTA  
GACGCATGCATGGAGTATTAATGTAGGTTAAAAAAATAACTAATTCATAGTTTGTCTGTAAATGTCGAGACGAATCTTTTA  
ACCTAGTTTACATGATTGGATAAATTTACCAAATAACAATGAAAAGTGCTACAGGAACTTTACACCCACTTTTACACCATCT  
AAACACTACCATAATTTGTATAAGCATAGATCAAGTTGATGAAACCACAAGACATTGACAGCGGTTAGAGATGGACCGGCCG  
ATGAGGAAGCCAGCGGCCAACCAAGACCACGACCCAGCATAACATTTTTATTTTATTTTTTGGTGGTGGTGGTGGAGATAG  
ACTACCCGATTTGAACCAAGTCCATGGAGCAGGCGCTGAAAATGTACCAGGGTCTCGCCGGAGCTCCGCGCGGTGGCCG  
GGCCGTGGAGGGGCAACCACGCATTGAGAAGAGGAAGAAGACAGTGAAGGAAAAAATCGAGTGTCTCAGGGCCCAAAA  
CACCCGAACCGACCAAACTCAATTTATAAACTTGAAATTAACAAATGAACCTGTGCTACATTGACAAGAAAAAGGGAGAAG  
GACAAAGTCTTAAATCAAATATAATCAGTTTATTAGATCCCTCTACACCCGAAATTTATGAGCGTGTGTATAAAGATTCTGAT  
GTTTTAGATGAGCTTCTAACCCAGATTAAAGGTGTTGTAATAACCCGGGATAATTTCCCTTACCACACACCAATTTATATCTA  
AAAATTACACCAAAATATTCACCGTAAATCTAAAAGTTAAGTATAAATCAAATATAAAAGTCAAGTATAATAAATCTAATAAAA  
AAGGCAACTATAAAAATTCACCGTAGATTTAGGATGACTTATTAGTCTTATTCCTTCTATGCATGCCATTTAGATATATAGAAA  
GAAGAAAAGGGAAATGAAGGGAAGAAAAAATTTGACGTGGGGGAAAGATTTAATTTTCACATGTGTGCTAACCTCTCTA  
ATCCCACGCGTCAACTCTTCAGAAGCAATGCAGTGCAACGCCTGATCACATATTCACATGTGTGCTTAGCCGCTTTGCCTAG  
ATCTGGAGAGGAAGAGA

>SsLRR-RLK47

GTGTGTTGAGGGATGCCAGCAGCTGGCCACTGTAGATATTGGGAACAACAGGTTCCATGGTGATATTCTCCTTGGATTGG  
AAGCGGTGCTCCAGCACTGAAAATCCTTAGACTTAGTTTGAACAACCTTCACTGGTCAAATTCCTCCGGAGTTATCACAGCTT  
TCACAACTTCAGTTGTCTAGACTTGTCCCACAATAGATTGACAGGATTGATCCAGCAAAGTTGGGAACTTAGAGTCCATGA  
AGCATCCGAAAATTAATTCAGTATAGGATCGCTAGATGGGTCCACCTATCAGGATAGAATTGACATCATCTGGAAGGGACAA  
GAGCTGATATTCAAAGAATACTTGAGCTGATGACAGGCATCGATTTGTGAGGCAATTCAGTGTGCGCACTGCATCCCTGAAG  
AGTTAACCAATCTCCAAGGCCTCCGATTCTGAACCTGTCAAGAAACAATATGTCATGTACCATTCCAAAAACATTTGGTAGC  
CTCAAAATCTTGAGTCCCTTGATCTTTCGTGGAATGAAATTCAGGGCCATTCCCTCAGGATGAGTAGTTTGACGCTCT  
TAACACATTGAATCTCTCAAACAACCATTTGTGAGGCAAGATACCTACCGGAATCAAATTCAGACACTCATAGACCCATCG  
ATTTATGAAAACAATCCTGACCTCTGTGGACCTCCTTTGAACATTTCTTGCCAAGATCCGTCACAGGCATTTGATGAGGGAAA  
TGGCGGGAATGCCAGGACCAATGGCTGTACTACTGTGTGATCGGTGGAATTTGTTTTGGATTCTGGCTGTGGTATGGGATGC  
TCTTTTCCATTGGGAAGTTGAGGTATTCTGTTTTCTGTTTGTGATCGCATACAATAACAAATATGCAAAAAGGTGCGGCTTA  
TCAATCATTTTCTTTGAAAGAAAAGAGTGATCCATCTCCGTACCTATGTTTTCCACAAGTGATACAAGCTGAAAAATGGAG  
TAAGAGTAATGATGCTCTCTACTATACTAGCAATCCAATCTTCTCTTTTTTTTCCCTCCCTAGTACCGCGAGGAGATTGCG  
TGCTTTCTTTGTATGCTTTAAGATGTAATGCTGAGAGTATGCTCGAGAAGGATTATAGTTAACTGTTATATGCAATTTTCAGTAA  
AAAAAACATTATATGTTTAAAGGAGATTGCTGTCTTTCTGTATGCCTTTCTGATATGACACGTTTAAAGAAGTTCTTACTTTTT  
TGTAATTGATTCAATTTCTACTACTGTTTTGAAAAGAATATGCATAAGAAATTAATTTCAAGAAGTGGCATAGATATACCCGTCAT  
GCATTGAGGGAAAACTTATGCTGGGAGCTGCACCTCCATCGTCAAAAAGATTTAGAGAGAAGTAAGAAGCTTATCATGCACAG  
CCAGAAAAGGGTAAGGAAAATAAAGTGACAATAGTTTCTCTTAGCCTGTGCTCTGATATCTATATTCAAGTTACATATTTAG  
CCCTTCCGCTCAAATGGAGCAATAAATCATAAGTATGGCAATAAAGTAGAACACCTAAGTTGACTACAGACTAATTTCTTGCAA  
TTGGTGACTTCCATAAATTTCTGATGCTATCAACCAGTTCTACCAATAAACTTTCCTAGTCTGTGCTTTGGTACTAGAACTT  
GAGAACTTGTATGCTAGAACTGTGGTTTCTGACAGGTAATTTATTTGCTTCAGGTAGTCTGTTAGTTTGTCTACTACTAG  
ATCTGTGCGGATGGTGACAGAAAGACACGCCTGAGTATGCGACGAACATGTACAGTTTCTTCTGCAATGTCTAATATGCTGT  
AGTTGAGCAGGCAGACATGTTGAACAAACAAACAGTCAAACATAGAACCCTAAACTACCCTGGTCTCTCTCTCCCAAAA  
TTCTAGCTATCTGATTGCGCTAGCTGTTATCCAGCTAGTTGGGTGCTGCCAAACGAAGCTAGATCGTTACAGGCTGCCAGCC  
GATCC

>SsLRR-RLK31

TGTGTATTAAATATAGACTAAAAAATAATTAATTGTACAGATTGCGACTAATTTACGAGACGAATTTTTTAAAGCCTAATAGTT  
TATGATTTGATACTGTGGTGCTATAGTAAACATGTGCTAATAACGAATTAATTAAGCTTAATAAATTCGTCTCGGAAATCTATA  
ATTTATTTTTTATAGTATCAAAACCCCCTAACATTTGGATGTGACACCTACCTACAAAGACTTGGGAGGCCATCAITCCGCATA  
AGTACAACAAAGCGCGTGACTGACTGCACGTCCAGAGAAACGACGTAAGATGATGTTGGGTAGGTCATTAGGCGTACGT  
TAAGGGGTAGTTACGTTTTTTTTAGAATGGGCCAGCGAATAACACTACTGTCCGCCTATCCGGTTCTCTGTGCTAATGGATTTT  
TGTTTCTAGTACTTTTCGAACATGATCACATGATGAAGTACTCCGTATGTAAGTTGTAAGACATGCTGGAAACATGTTTATTTG  
TGCTCGTCTGGCCTGGGCCGATAAACTAGTAGTAGCTGTAACTACCAAAGTCCCGCAAAGATTTTTATATCTCAAGTCAAA  
CGAACGTAAGTTAACTAAGTTTATATAAATAATAACAATAATATCTATGATATTAATAGATACAATCAGATTCATGCATAT  
GTATAATGCAATATATCTTTATAGTAAATTTATTTAGTGTTATATGTGTTGAAATATAATCTTCCCTTCAAAAAAGCGTTGATAA  
TCTACTCTTTAAAGTTAGTTAAACTTAAAAATATTTAACCTTAGCAACAAAAACAAAACTTCACTCTTTGTGACGAGGGTAGC  
CAGTACTAATAACAGCCTTAATCGTGATCCACAAATGTCGTTACGAATTAACCTGCTGTGCACTCAAGCAATAGCATAGC  
CCTCCCTTTCTCGGTTGGACTAGGACCGCGACCTAACGACCACAAATCCGGAATGGGATGACAAATCGAGCTTTTACCAA  
GGCTTGCCATTTTGTCCAGGTCAAAAATCACCACCTGTTTCCGACGGCTGTTTCTGCGGCTTATAAGCCGGCTGTGGCTGTT  
TTGCTGTGAGAGAAAAACACTGTTCCACGGCTGATAAGCCGTGCTGATAAGCTCAGCCGAACAGGGTGCACGTAATTGAAC  
CATCATACCTTCTCAGCACACCAATATACCTATATACAAGAATTCTAGTGGGAATAAGCTTTGTTATCTAAATGCATAATAAAAA  
GGGAGTAGTACAAGTTAGAGTATGTTTTTCCCTCAGACATGTTGGCTCTCTTGGGAATCTATTCAGTTCGGTGTGTTTATC  
ACGAGCAATAGTTGGTTTGTGATCAATGATGTTAACTAATTTGTTGCTGTTCTATGACAAGGTTGACTCTCCAA  
CCATCTGTTCTCTAGTGGTGGAAATTATAAATTAATTTGGGAGTTTTTCACTTGTACTAGATCTAATTCCTAGCGGCAAG  
TGGATTTTGGGGCCATCAAAGTCTTGATGGCAATGACGTTGTAGGTGTCTTTTTATCTTATTGCTCTTTGATTGCAATTTTC  
AAATTTCTAGACAAATAATCGAAGAAAGAACAACATACTACGTTTGTATGCACTCTATTTTTATGGTCAATTTGTGACAAAT  
ATTATATTTTACAATAGTAATCATTTTTCTTGATAAATATCCGACATAAGACATTTCTTTCGAGCGTTTTTATTAACAAAAACATTT  
TTTATCGAGAGAATGAGAACCGGAATCGCACGCATACTTGACCGGCCGTAGCACCGCATGTGCTCGCAAGTCAACCCACTG  
CATTGACCGCCAGCCAGCCGCGCCCGCGCGCGGAGCTCAAAGAGTCAAGACCACACAGTGCTCACCGCCACACCGC

ACCCCGTCCGGCCCTCCCCGCCGCCCTACCCGCACGAACGGGCACGGGCACGCCGCGTTCCGCTCTGCCACCCGGCCA  
>SsLRR-RLK61  
CCTTTTTCAGGTTTGTGAAGATCAGCCCAGAGGGTAAGGTGCATGTGTATAACGGTGGTGATGGCAAATGGATTGCTAATTCT  
GATGTGATCACCCAAGTCATTGAGTAGAAGTACCCAACCTCCATCTCTGATCACCACTCAGTGTAATAAGTTCAACTGGTGCTT  
GTTTCTAAAGATCCTTGCTATATATTTATCCCTGTAATTTTCATAGGAGTTACCTCCTAAAGGAAAAAAGGAAGTAATGCAITTT  
CTCAAGTATATACAGATCATAAGTTTCAGTAGGAAGCAGATGTACAATCTGTCATGCAATTAATTTTATCCAGTATGGTTGAA  
CTATGTCCATTTGCCCTACAGCTCCAAGCTTGGTCTTTGTGTTTCCATTTGACGGAATCGACGGAAGACATCTGAGCTACCTGGGAG  
ACTATGTTGAAGGATGAAATAGTTGCTAGGAATCATCAAAAGTCGTCAAATGTTTAGTGTAGTTTTGACGTGTTCTTGAGACA  
TGTGCATTTGTATGCTGTGATTTGATTCCCTGTTATTCTACTCTGAACCTCATCCATCATGCTACAAGAACTAATGCTTCC  
TGATGTTAGGAAAGGAAAGCTATCCTAATTGTTCAATTGCAACCTTGTAATATTTCTTTTACATGAAAAAAATTTGGTCTGCA  
CTCAGCTTGGTTGAAAAAAATTTGGTGCATGAGACTAAAACTATGAAAAAAATATCGGCGTTTAGTTGAAAAATGGTTGTT  
TTCAAGTGCATCCTTAGAATGAAGCCGTGGCGTTAACACGGTACTATACTAGTTATAAGTAATTATATAAGATGATGTTTGAT  
CGTTTATTTATTTAACACAAGCAAAAACTGAAACATTCAGTTTGAGATAAAAAACATTCATAAAAGATAGCAATATTAACCAT  
GGAATGCCAGGATGGTAAAAAACTCCAGGGGTAAAAATGGACTTTTACATAGGACTTAACACCGGTAGCTAACCCAAAC  
TGACGGAAGTGTCAAATAGGTAAGAAAACTCGAGTTGAGGACATATAGGAAAGATTTTCAGTTTCAGTGTCAAATAGAAA  
ATGAGCATTTATTTTCAGGGCCAAATAGGAAATTTTCTCATAAATCTAGGCCCTGTTTCATCCGGCTTATAATCCGTACTTTTCAA  
CTTATTTTTCAGCCAGAACAATATTTTCTCACAATAATCTCAACAATGTTTTTTAGCCGGCTATCGCACGACCGGCA  
ACGGGGCCTTATTTTGGGTTTCTATAGCCGATGTTTTTTTAGTCACTACTAGATCTAATTCATAGCGACGAGTGGTTTTGAG  
GTCACCAAAAGTCTTGCAAGACAATGTCCTCGTTGCGGTGTGCTGATAAGCCGACTGAAAAACACCGTTGGCTGATTTGTTGTG  
AGAGAAAAATCTGTTCCGGCTAAAAAACAACCTGAAAAATACGGATTATAAGCCGGATGAACAGGACCAATGGTGTGTTGT  
CTTTTGTCTTTGATGCTTTTAAAGTTAGTTAACTTAAATATTTTAACTTAGAACAAAAACAAAACTCATCTTTGCTGGAC  
TTGATATACCTTATTTTATGGTCATTTTGTGACCAACTTTTATAATAGTAATCATTTTCTTGATAAATACCCAAATAAGACAT  
TCTTTGAGTGTGTTTTATTGAAAAAAAAGCTTGAACGTTTTCTTTATCTAGAATGAAAACCGGCATCGCATGCTTGAC  
CAATGCAAGTGCCTGCTCTTTTCCCGTTCACGCGCTTCCACCCCGCTGCGCCGCTGCGCAATGCTGTCTGCGCAA  
GTCAACCCACTGCATTGACCGCTTGCCAGCCGCGCCGCGCGCGCGAGCTCAAAGAGTCAAGACCACCACGTGCTCA  
CCGCTCACCCGACCCCGTCCGGCCCTCCCGCCCGCTCACCCGCACGAACGGGTACGGCCAAGCCGCGCTCCGCTCTGC  
CACCCGGCCA  
>SsLRR-RLK46  
CTCCATCGTACCGCTTGGGAGACCATCATTCCGCATAAGTACAACAAAGTGCACGTCCAGAGGAACGACGTAAGATGATGG  
TTGGGTAGGCCATTAGGCGTACGTTGAGGGGTAGTTACGGTTTTTTTTTAAAGATGGGCCAGCGAATAACAGTACTGTCCGC  
CTGTCCGGTTCCAGTGATCAATGATTTTTGTTCTAGTACTTTTCGAACATGATCACATGATGAAGGACATGCTGGAAACTAG  
TTTATTTGTGCTCGTCTGGCCTGGACCGGATAAATTAGTAGTAGCTGTAACACCAAGTCCCGCAAAGATTTTTATATCTCA  
AGTCAAAACAAACGTAAAGTTTAACTAAGTTTATATAAATAATAACAATAATATCTATGATATTAATAGATACAATCAGATTC  
ATGCATATGTATAATGCAATATATCTTTATAGTAAATTTATTTAGTGTTATATGTGTTGAAATATAATCTTCCCTCAAAAAAAG  
CGTTGATAATCTACTCTTTAAAGTTAGTTAACTTAAATATTTTAACTTAGAACAAAAACAAAACTCATCTTTGCTGGAC  
GAGGGTAGCCAGCTAGTAATACAGCCTTAATCGTGCATCCACAATGTCGTTACGAATTAACCTGCTGTGTCACCTCAAGCA  
ATAGCATAGCCCTCCCTTTCTGGGTTGGACTAGGACCGCGACCTTAAGGCCAGTCTCAGTGGGAGTTTCACTAGAGTTTCA  
TTTGTCATTTAATAGCTGACCATATGCATTTTGTAGTATGCTCAACGTTTAAATGAAGAGAGAGAAGAATGAGTTTATG  
GGATAAACTCTCTTGGCACAGTTACCAACTCTCTATGAGTCATATAATTAATGTCTATGAACTATGGAGTAAAACTTTTCA  
TTGAGAGTGGGTGTTTCATCCGAGTTTCATTTCATCTATATGACATGGCAGTCTTGAAAACACGAAATGAAACTCTCCACT  
GAACTGGCCTAACGACCACAAATCCGGAATGGGATGACAAATCGAGCTTTACCAAGGTTTGCCATTTTGTTCAGGTCAAA  
AATCAGCTAATTGAACCATCATACCTCAGCACACCAATATACCTATATACAAGAATTCTAGTGGGAATAAGCTTTGTTATCTAA  
ATGCATAATAAAAAGGGAGTAGTACAAGTTAGAGTATGTTTTTCCCTCAGACATGTTGGCTCTCTTGGGAATCTATTCACT  
TCGGTGTGTTTATCAGCAATAGTTGGTTGGTTTTGATGCAATGATGTTAAACCAATTCATTTGTCTGTCTATGACAAAG  
TTGATCTTCCAACAATCTGTTCTCTAGTGGTGGAAATATAAATTAATTTTGGGACTTTTTTTTCACTGTCTAGATGCTCA  
ATTCTAGCGGCAAGTGGATTTTGGGGCCATCAAAGTCTTGCATGGCAATGACGTTTGTAGGTGTCCTATTCTATCTTGTGCT  
CTTTGATTGCAATTTTCAAATCTGACAAATAATCGAAGAAAGAAGACAACCTATATCAGCTTTTGTAGTACTCTATTTCTATGG  
TCATTTTGTGACAAATATTCTATTTTCAATAGTAATCATTTTCTTGATAAATACTCCCTCCATTCCAAATATAAGGCATTC  
CAAGAATCTTGGAGAGTCAAAAGCATCTTAACCTTGACCAAAATATAGAGAAAAATTACAAAAAATATAACATCAAAATGAGTA  
TATTATGAAATATAATTAATGAAGAATCTAATGATACTTAATTTGGTGTCAATAATATTATTATCTTATCATATAAATTTGGTCAAA  
CTTGAGATCCTTTGACTCTCCAAGATTCTTGAAATGTCTTATAATTTGGGATGGAGGGAGTATCCGACATAAGACATTCCTTTG  
AGCGTTTTTATTAATAAACATTTTTTATCGAGAGAATGAGAACCGGAATCGCACGCATACGTGACCAATGCA  
>SsLRR-RLK169  
CATTGACTAACGAATGACTGTGGTGGATGCTTGGATGCCGCACCTGCATCTTCTAAAGTTGCTTTTCAAGTTCAGATTCAGTCCAAATC  
CACCACCTCGTGTTACATAGTTTTTCTAGTGACTTGGTCAGGATTTGGGATCCGATGATCGTTATGCAGTACGGACTATGGA  
CCACTGAAGTCAAGACCGGCACACGTTTAAAAAATCAAGCACTCGTATAGTTTCTCCCTAAAGTTTACGCCCTATCCCTACG  
AATGTTTGTATACGTGCATGAAGTATTAATATAGACTAAAAAATACTAATTTATACAGATGGCGACTACTTTACGAGACAAA  
TCTTTTAAAGCCTAATAGTCTATGATTTGATAATAAAGTGCTACAGTACACATATGCTAATGATAGATTAATTAGGCTTAATAAAT  
TCGTCTCGCGGTTTACTGACGGACTGTAATTTATTTTATAGTATCCGAACACTCCCTATAACGCCCGGACACGAATACG  
ATGCTGACCGGTGAGCATGAGCGTGACCTGATCGTATGCTGCGGTTGCCCGCGGAAGCATGGCGTGTCTGACGGAGTACG  
CGTACTACTACTGTGCTGACAAACGTCCAGCTGCTCTTGGGCTTGTGTTGGCTGTGCTGATAAGCCGGCTGAAAAACACTG  
TTGACTGATTTGTTGTGAGAGAAAAATACTATTCCAGCTGAAAAAAACAACTGAAAAGTACGGATTATAAGCCGAATGAAC  
AGAGCCTTTGGGAAAAATTTTTGTTCCATTTTGGTTTCAAGATTTTTTACAATTTGTTCCATTGTGGAAATGAAGCACAAGAT  
TGACAATTTCTAGTGTGTGACTGTGCTGGCAAACTGGCAACATCAAGGAAAGTCCATCTACATACCTAGATGGCTAGTGTGTT  
CTCTGGTTTTGGTTGCCTGGCTATCTAATAGCGCGTTTGGTTTCACATCATGAGGTTGTGCGGAATCATCTCATCCAACATCCAA  
CCTTGGTGAGACGTTTGGTTGTCATCTCGTCTCAACTCATCCGTCACGAAACCATTCCTTGTACGATGTTTCCGTAGGCCAA  
CCCCAACAAATCTATCGATAGAGTCAATTTCTAGAAAAATGCCGTACGACTTCATTCAGACCAACTCAATTTCTGTGCGCGTT  
TGGATCAATCAGGATTTTTTACTAGCCATGTGCGCGTTGCTCATTTTTTTCATCTAATTATCTTGTAACGATAAGTAATGTGC  
ATCAGTACACGCATCTTATATAATGTAAAGAGCTTAATTAGATCATCTGATTTATTAGGAAAAATGATGAAAAATGGCATCAA  
AATTATCTGTTTTTTAGGACGGCCTCGCCACCAATTTTGAAGTAAAAACGGCTCAAAATAAAACCAACAATTTAATCAGTCAC  
CACACCTGCGGACCCGCGGTCAACACAGGAAGGTTGCAAAATACAAATACTACGAAATGTAATAAACGAGAAAAAAATTA  
AGAGCTGTAGTAGTTCGTGTTTGGCCCATCATAGAAATGTTTCATTTGATCCGGCCACAGTCGATTTCCAAGACCTCAGCCC  
AACAGCCCCAAGTACCCCAAGCCCAACAGGCCTAGGTTTGTCCCTCAAAGAAAAAAGGCAAGGTTTGAAT  
GTACTGTATAACTCTCTTTTGGGGAGGGGTACTCAGTAAATCTTACTTTGGCTCTACCGCCGCGGAGAGAGAC  
GAACACTGTGCGGATCTGTAACCGTAGTGCCTTCCACTTCCACTTCTCAGTTTCATCCACGACAGAGCAATTAATCAATT  
GCACAGCTGCGTTCTGTAATCTCACCCGTCAATCTTCCGTTCCTCAAGTCGCAACTGCGTTTCTGCTCCGCTCTTCAAAG  
AAGGGAGACCTGAAGGAGAAACGAATCCAGGCTGCTGGCTGCCGCTGCGGGCTGACGCTGGTGCACTGCGTAGGC  
AAAGAGCAGGCAAT  
>SsLRR-RLK357  
TAGTACTAAAAACCACCTCATTCTCCTCTCTTTTTTAGATTACTTCAAAAAAAGAATCATATAGAACTTCAAAATCTTCCAA

CATGAAAGTTGTTCAAAATTGAAAAATCTACAACCTTTCATTTTGGATCAACTCCAAATTCCAATTAGTTTGGAAAGTAGGAT  
TTTGAATTTGAGTTTAGGGTGATTAATAATTCAATTACAAACCTTGGTATTCAATTAGTGAATAATTACTATTCAAACCACTCAA  
TCAATTTGACCAATTCCAAAGACCAAAATTTAATTATGAAAATTTATTTTGATAAATTCCTCCAAAAATTTAAATTTCAAATTTGAATTC  
AACTCCAACAACATATGCAACATATACATGTTATTACTGCAACATGTGAACCACTACATATGCAACATTTGAATATTACTCATG  
AAACATGATATGTTTTATGCCATGATACCTTGATGATGACATGATGAAGGCTTTATTAGTGCCTTAACACCTAGGGTGCTACAC  
TTGGGACGTGTGGGTAGAAGTGAAGTCATGCATTGCATTGCATCATTTGCATTGCACTTGGAAAGTATATTTATATTTTACGAA  
GCAATTTGATGCTCTATTATTATGCGATTAAATTTGATGCTTAATCGAACTGTGATTTAAATAAATCTGGTTGAAGCAGTTTGGT  
TACTGAGGTTTTCTATAAACCTCATACGCTTGTTCCTTATCTCAGGTACTTGATTTATGAAGATGCTTGGTGGGATGGAAGTA  
GCAACATGTTTGCACACGTGTCAATATACACTTCAAACAATCAATTATGTTGTAATGAGTTCTCTTTGATGTTGGAGTTGTATC  
TTTGCTTCCTTTCAAAGTTGCTAGTTGCAGCTCAACTTTGTATTGTTATGTCATCGCAGAAGACTTAAATTAATACTTAACTCT  
ACATGACATATTTTGTCTCCGCGTGGTCTGTTGTTGTAGTGTAGTGTGGTAATTTCTAGAGGATTGTTGTGTTTTCTTCTG  
AGGTGTTACACAATCATTATCCGGATCCTAGACTTACGACACGTTAGTAAAGCTGTCTCATTGCTAGCTCTAACACACCTGGC  
AATAATAGCCAGCAGGAATGTTGTGTTCTGTAGTAGTGCATCTTTGTTTTCATCTCTTTCCCATGCTGGTTGCAGCACATC  
GCCTTACCCAGTGTTCCTATTATATTTTCCCTATAGTTTACGGGTCCTGTTAAATTTGCTCTCTCCAGCACCGGCAATG  
AGGAACGAGGGCAGCAGGCTTCTTGCACCAGGAAAGCAATGGGGAGCGAGAGAAGCTCCTTGAGTGGAAATCTGACGCA  
GAATTGTTCCACGTGCAGCTTCTTTTCTATACTCCCCCTGCGTTAGTGAGAAGAAGCTACTCTAGTCAAAAGGCCAAAGA  
AAAATGGGAACAACCATATCAAGCAATAATAGCATAGTAACTTACGTCTTGCACCTGGATAGCAATGGGGCAAGAGAT  
GCTCCTTGAGTGGAAATCTGACGCAGAATTGTTCCACGTAGGCTTCTTTTTCTATACTCCCCCTGCGTTAGTGAGAAGAAAG  
AAGTAGCATAGCTACTTTACGACTACACATGTCAATGTTCTAACGCACCTACAATTATTATTTGCACTATACTGTGCATCAC  
TCGCGCTGCTTCATGTTATGTATCATTACATATGGTACGACTTACTACTGAGTCAATTAGTCAAGGTAACCGTGTATCATGTGGT  
TCCGATCAACTGATGACGCGTCTGTGATAACGTGATGTTGGTTCTCGATCAACTAGTCAAGTGTAGTCAAGTCAAGT  
AACCCTGTATCATGTGGTCTCGATCAACCAGTGAATGACGCGTCTGTGATAACGATATCTGACATAGTGACTTACTCACAGT  
GAATGACTCGTCTAAGTGTGTTATATATCTCCAGAGCAGCAGGGGCAGCCTCATCCAACACACATCTAGCATAT

>SsLRR-RLK368

GATTGGACAAATTTTGCCAAATAACAACGAAAAGTGCTACAAGAATTTTAGCCAAAAAATTTTGACATCTAAACCGGCCCTG  
AGTGGAATCTGACGCGGAATTGTTCCACGTACGGCTTCCTTTTCTATACTCCCTGCGTCACTACTGGAACACAGGCGCGC  
CTAATATGCACTCGACAAAGGCTTTGCCGAGTACCGCACTCGGCAAGCCACACAACAAAAAAGTCGGCAAGGC  
CACTTTGCCAAGTATTTTTATCCAGCAAAATTCAAAACGAAAAATTCCTTTTAAAAATAGCAAAAAAATTTTACCGGG  
AGGCCCATCGGCCAGCGCCCGCCGCTCTCCGTCGACGTGCAAGTCGTGGCATTTTTTCGCGTAAATTCGTGCGCTACGCG  
GCTGGCGGGATTTCGAACACGCGACCTCTCCCTTGCCTGTAACCCCTGTACCACTGCAACACACTATCACTTGTGTCTAGAT  
TCCGTTTTGATTCCTCCATATACTATACTAATCCAAGTGAAATTTGATTGTTGGGGCCCTAAACGAATCAAAATCAAAGTTT  
CAACTGCAAGTTTCATAACTTTTTGAGATCTACAATTTTCATATAGGAAGTTTCTCCATCCAAGGTCGTTTACAAATTTGAAT  
TTCAAATTTGAGAAATTCAAACATAGTTTGTATGGCAAGATGATTTCAAATGAAATAGTTGTCAACTATAAAGTTTATAACT  
TTTCGAGATCTACAAAGTTTATTTTGGTTGTTTTTCCATCCGAGGCTTTTGAATAATTCGAATTTTAAATTTTAAATTTAGA  
TGCAGTTTTCATAGCAAAATGATTTCAAATTAATAAATTTCAACTACAAAGTTTCATAACTTTTCAATATCTACAAAGTTTA  
TTTTGGTTGTTTTTTCATCTGAGGTCTTTTGAATAATTCGAATTTTAAATTTTAAATTCAGATGCAGTTTGCATGACAAGA  
TGATTTCAAATCAAAAGTTTTCAACTATAAAGTTTTCATAACTTTTCAAGATCTACAAAGTTTATTTTGGTTATTTGATCATTTA  
TGCATCCGACATGGTGGTTTTAACATTTGTTTCAACAATCTTATATACTACAAGAGAGCTACGTAAGATTATGACAAATTTTA  
CTTTCACTTTGTATATGAATAAATGACCAAAATAAATAATGTTTCATCTTGATGAGTTATATACTTTGTAGTTGAAAACTTTT  
TCATTAGAATTAATTTACTCCTTCAAAATGTGTTTTGAAATTTATCTTTGCCGAGTGAAAAAATACATTCTTGGCCGAGTG  
TCAAAAAAATCACTCGGCAAGAAAGCTTATTTGCCGAGTGCCGAGAAAAAATCACTCGGCAATCATTTACCACTCGGCAA  
AGTTTGATTCTCCGTTAGTGCGTTAGTGAGAATAAAGAGTCACTTACTAGTCAGAAGGCCAAAGAAAGTGGGAACACCAT  
CATCAAGGAGTAATAGCATAGAGCCTGTTGCTTGGGCTAAAAATAAGCGGCTAAAGTACTGTTGGCTGATTTATTGTGAG  
AGAAAAATACGTTGGCTGGCTGAAAAATAAGCGGCTGAAAGCTCAAGCGAACGGGACTTTACGACTACACATGTCATGGT  
TAACGCACCTCAATATTATTATTTGCACTATACTGTGCGTCACTGCGCTGCTTCATGTTATGTATCATATGTCACGACT  
ACTACTGAGTCAATTAGTCAAGGTAACCGTGTATCATGTGGTTCTCGATCAACGACTGAGTCAATTAATCAAGGCAACCGTG  
TATCATGTGGTCTCGATCAACCAGTGAATGACGCGTCTGTGATAACGATATCTGACATAGTGACTTACTCACAAATGAATGAC  
TCGTCTAAGTGTGTTTATATATCTCCAGAGCAGCAGGGGCAGCCTCATCCAACACACATCTAGCATATGCGTCTCCTGGC  
CTCCAGATCA

>SsLRR-RLK92

TATTTTTCAACCACCTCCGTAAATAGATTTTGCGAGGCGGTTTTTTTTTTGTAACCGCCTCGGTTAATAAAAGTGCCCGTCTC  
GGTTAATCCGAGGCATTACCGAGGCGGTTGAAAGTGCTGCCCGCTCCGAAAAATAATTCCAAACACCTCGCAAAAGAT  
TTTTGTAGTAGTGATCGTGCACAAGTTCTCAAAAGCAGGAAAAAATTCAGTGAGGACCATCCCTACCATGACGCGATG  
TAGATGTTTGGCTGACGTATGCCCCATGGGCAACTAATTCGCCACGCGTATGTTGATACTGTGGCCTATATTTCAATTGCACA  
GTCTTACCATGCTCTTGGTAGGGATGATCCTCACCGGATTTTTTCCCAAAACGACACCCCAAGGAACCTTTAGATTGTAATG  
ATAATTAGATTAGACTCTCTTGATCTCCAGCGAGGTGATTGGGCAAGCTCAACAAGGTGATGGAGAACAGTAATGATCTTGG  
TGATAGCAAAATTACGTTGAAATATGATTTCAAAGACCAACCCCTCTCTATATATGAGAGGATCACGGTCAATTGAGAAATCTATC  
AATCCGATCGATCAAAACTAATCTACTACGTACCTACTTTTTAACCTTAACTTTTCAATTCCAACCCCTTGTGTCCAG  
ACTTCTCCGAGGAGATTGCGACATTCTAGATGGCTATACGGATCCTAGGACACTTGTCTATGCTCCTCTCGACGACAG  
GTCTTCCAGAAAAGTGTTCACAGGCTTTTCCGGGGTAAAGAACAGAGTATCAAAAGTACATAGCCGACTTTTCGATCGGCTTTAT  
TATGTTGACCTCACTTACTCGGGAATCAAGTCTAGCTAGTACGTGGCCATATTGCCGAACCATTTGTTTTTTTTTTAGCTT  
CATATTGCATCTCTACTATAATGGACCAATCAAAATAATACTAGGTATAATTTTTTTTAAATATTAATATAAGTACACTATTCAGC  
CCTGTCTTATTTTTATTTTTGGAAATTCATATATATATATATATATATATATATATATATATATATATATATATATATATATAT  
ATATATATATATATATATCTTTTGTCTCTGTCATTCACTGTGAATTTTGCTAATGTGTGGGAACTGATCTTGTGTATTTGCTTGTG  
AAGCCTTCTCAACATAATATTATAAGACAGACGACCTGATACATGGCAATGGCATACTCAGTTTATGGCAGAACAAGAGTCTCT  
CTGTTCTTTCTCCTGGGTTGGTAATGCAGAGGAAAATCATATCTTCAGTTAATATATTGAGTCAAAATAGGTATGCGTGATGC  
AGACCAATCTGCTGGAGGTGGATAGGATTTGCGGCCAGTGGGTGCGAGTCATACTACGGGACAGTGTGTATGTACTGAACA  
TGGTCATATACAATTGTGTCAAAGTTGAACCTCTGAAAAAATCAACCATCTGATTATTTTATGTACATCCCTGAAATGAAGC  
CGTGGCATTAGCACGGGCACGTGACACGTCAAAATTAACCGAAGGCATTGTTGCACCGGAAGACATTTAATTTGCACTGT  
TTAGGTCAAAGCACACCCCGCAAGCAGGTAGATGGAGACCGCCTGGTGGTGAACGGGTCTTGCAAGTTCATCAGAATCG  
CTGTAAGGAAGACTTGAGCTTCTTGAATTTGAAGTCGTTCTAGTGTGCTTTGTGGTACAGTCACTTTTGTGTTGTCCGGC  
AGAAGACCGGGTTAACCAAAATTTGAGGTCAAGCGGCCAGAAGGCGAACTAAACAAGTGCCTTCCGAGAGCAATGCGCAGC  
AGTCTTGGTTACGCTGTGTCATCATCAATACACAGTGCATGTTCTCCGAACGATCATTTAGCGCTATATATACACACTCTC  
TGGCCAAGCTGTTCCGGCAGTGTGACCAATTTCTCTATATATACTCGAGCTACCAACAAAAATAACAGAGAAAGCC

>SsLRR-RLK11

CTCAAAAGCCCTTTTCTCTCTGCTGGAGACACGCCGCCACTGCACTCCATCTGCAGATGAGGAGATGGTTGGAGAGGAAT  
GACATGGGAGCAAGTGTGGGACTCTACGGGTGATGTTTACTTGGATCTGCTCCATGGAAAGGGAAGTGGAGAGAGACTG  
AGCAGGAAGAAGATGGAGATGGCAGGAAGGAAGATGCCGAGGGCGCGCATGTAGATGGGAGCACGGGATCGGAGGAGAT  
GAAATGAAGCCTCTCAGTGTGGGTGCTGTTAGTTTCTAACGAGTTAGAAATAGTACTGGCTCGTTTCGTACAATGAAATATTT  
TCCTTCTCTCTCTCATTAGTATGGACAAAAAATCTATTTTTACTGATGTATCAATTTATTTAATACATATAAACTCTCATGA



TAATGTGGTTTGCTAATGTGAATAATGGGATGTGCTAGTGGAAAGTTGACGTGGACACTTTGCATGGTGAGATAAATTGCATGTGCTAGTGGATGCTAAAGAGATAGATAGTTGCCAGTAGGGTTTGGAAATATAAGATATATAGATATAGATATGATATAGATATAGATATAGATATGGTGTTCTTTATATAGTTAAGCAACTTTTCAGTGTTTAATGATTTGTCCTTAAATTTGCCATATGAATTAACATGCTCTATTTTGCTCCATAAAAAAGTATAAGACTTTTTTTAAGTAAACAATGCTATCGTGAGCCACCATACTAAATTTAGTTCCCCCTTAAAGAAGATATAAAGCTTTTGGTGATTATAAAGCATACAATAGACATAATTAATTTAGCAATATGCACTATACGCTTAGATAAATAATATAACAGATTTTTCGTGTCCTGTAAAGGCCACCTTAAAAAGTTTATTCTATCATTTACCAATTTGAGAAAGAAAAAATAATATTATCTTTGCATCTAGTAATACAAAAAATGTGTGCATCAAAACACTTCGATTATACAGTGGTAGATGACCGAACAAATATC

AGAACGTGGCAAAGTCAATAGTATCGCCATATGCCTCAATGTCATTGAACACATGGTCTTCATGGCTCTGCCCCTTGACGGCT  
CTATAGAGTTATGACTTTGGGTGATAGGCTCATTTCTTCTATGGCAATGAGAGATAAGATTTGTGCTCATGTCCCTTTGACGG  
TGGCCACATAACACCATATATAACTCAAACTTCATCTAATCATATGGGCCCTAGAGTCGGTCAACAAGACTTTGACCCATGAC  
TAACAAATGAGTCCACGACCCAAACAAACGGTTTGGTCCCTTCTCCCTCCCGCGGCCATTCAAGTTTGTCTCGATTACAGG  
AGTCCATAACCTAAATAATCGGTTCACTCTTCTTCTCTCATGCGTATCCTAACTTGCTCGATTATGGCCATATGCCTCACTAT  
TACTACAAGCATCTGCTCGTGGCTCTGCACGTTGATACCTCTATAGAGTTATGACTTGGGGTGACAAAGCTCATTACCTTTTAT  
GGCAATGAGAGATAAGAGTTGTGCTCATGTCCCTTTGACTGTGGCCAAATGTATTGCCAATATGACTCAAAACCTCATCTACCC  
GTGGGGATCTAGAGTCAGACACAAGACTTGGCCCATCGACCAACAAATGAGGGCCACGGCCAGATAAACGGTTCGGCCCCCT  
TCTTCTCCCGCTATTTCAACCTCTCTCTATTGTAAGCCACGGCCCAAATAAACGGTTATCTCCCTTCTTCTCCCG  
CGTCCATTCAAACTTGCACGAGTCATGACGAGCCACGGCCCAAATAATCGGTTGCTCTCTTCTTCTCCCGCTCCATCCA  
AACTTGCTTGATTGATGACGGCAACCATAGAAAAAAGCAGAAGAGGAAGAATGGGATATTCATAGCAGAACCAAAGC  
ATGCTAAACTTTTTCTATCCAGTCATCTGTCATGATCATCAAATTATATAGATGCCCGCTATAGTAACGTACTAACATACT  
ATCAAAGTATCAAGTATCAACACTTGTCTCTTAGCTCTAACCTCGAAGCAATGTGCTATCGGTGTACAACAATGGTGTTCAC  
CTAGCATCTCTTCTTGGTGGGGTATCCATTGCCATCTCTGAGTAGTACTGTAGTACTAGAATTTTGGACCCAAATGCACCGAG  
CACAAGACCGCTTTCTCTCTCTCCCTCTCTCTCACTTTCTCTCTCTAAACCACGGTCCCTCTCTCTCTCCAGTCTCCCCC  
GACGGAGTGCAGTGGGAGCGAGCGGGCGGCAGCAGCCACGGCCCTGTGCGCGTGTGGTGTGCGGTGCGTGCCCCAAAA  
CCACACAGAAAAAGCAGGCGCACGCACACGCCAGGCTGGGCACCACCACTGCCTCGCTCGCCAAGAATCCCCACCC  
AA

>SsLRR-RLK93

TGACGGCTCTATAGAGTTACGACTTTGGGTGATAGGCTCATTTCTTCTATGGCAATGAGAGATAAGATTTGTGCTCATGTCCC  
TTTGACGGTGGCCACATAACACCATATATAACTCAAACTTCATCTAATCATATGGGCCCTAGAGTCGGTCAACAAGACTTGAC  
CCATCGACTAACAAATGAGCCACGACCCAAACATACGGTTTGGTCCCTTCTCCCTCCCGCGGCCATTCAAGTTTGTCTCGA  
TTCATGAGAGCCCAACCTAAATAATCGGCTCAGTCTTTCTTCTCTGCGTATCCTAACTTGCTCGATTATGGCCATATGC  
CTCACTATTACTACAAGCTGTTCGGTCTGACGAGTTCATGACGATGAGTCTATAGAGTTATGACTTGGGTGACAAAGCTCAIT  
ACCTTTTATGGCAATGAGAGATAAGAGTTGTGCTCATGCCCTTTGACTGTGGCCAAATGTATTGCCAATATGACTCAAAACCTC  
ATCTACCTGTGGGGATCTAGAGTCAGACACAAGACTTGGCCCATCGACCAACAAATGAGGCCACGGCCAGATAAACAGTT  
CGGCCCTTCTTCTCCCGCTCTATTCAACCTCTCTCTATTGTAAGCCATGCCCCAAATAAACGGTTATCTCCCTTCT  
TCTTCCCGCTGCTTCAAACTTGCACGAGTCATGACGAGCCACGGCCCAAATAATCGGTTGCTCTTCTTCTCCCG  
GTCCATCCAACTTGCTCGATTGATGGCGGCAACCATTTGGGAAAAAAGCAGAAGAGGAAGAATCGGATATCCATAGCA  
GAACCAAAGCATGCTAACTTTTCTATCCAGTCATCTGTCACTGATCATCAAATTATATAGATGCCCGCTATAGTAACAT  
ACTAACATACTATCAAAAGTATCAAGTATCAACACTGGTCTCTTAGCTCTAACCTCGAAGCAATGTACTATCGGTGTACAACA  
ATGGTGTTCACCTAGCATCTCTTCTTGGTGGGGTATCCATTGCCACCTCTGAGTAGTACTGTAGTACTAGAATTTTGGACCCA  
AATGCACCGAGCACAAGACCGCTTCGTATCGTCTGCGCGCTCCGTCCAACCACTTTCCGCTTCTCTCTCCCTCTCTC  
TCCACTTCTCTCTCTAAACACGGTCCCTCTCTCTGATGACATCAAAATTCCAAGTTTCTTCTCTCTTCCATCACATCAA  
TTTTAGCCGCTTGATAGAGTATTAATGTAGGTAAAAAAATAACTAATACAGATTAGTTGGAAATCACGAGATGAAT  
CTTTGAGCCTAGTTGGTCCACGATTGGACAATATTTATCAAATAAGACGAAATAGTACTATTTATCGGTTTGAATTTTTC  
AGCATCTAAACGAGGCCCCAGTCTCCCCCGACGGAGTCGAGTGGGAGCGAGCGCGCGCAGCAGGCGCAGGCCACGGC  
CCGTGTGCGCGTGTGGTGTGCGGTGCGGCCCCAAACACACAGAGAAAAAGCAGGCGCACGCACGCCACGCCAGCTGGG  
CACCACCACCACCTGCCTCGCTCGCCAAGCATCCCCACTCCAAATGCCTTCTCTCTCCCTGCTACCGCGCGAGCGTC  
CTCTTCTTGGCCCTCTCTCGCGCTCTTTTGGCGCGCGGGGCGGCAGACGGCGCGCGCGGGGAAGCGGCGCGCGCGG  
GGATGCCGCGCAATGCAGGCGCTGCGGCGGGGCGCTGGCGCGCGGGCTGGGGCCCGGGCGCGGACCACTGCGCGTGGC  
GCGCGTCACTGTCTCCCGCGCGCGCGCGGCTGACCGCATCGAGCTGCGCGCGCGGGGCTCGGGGGACTTCT  
CGCGCGCTCTTCTCTCGCGCGCTGGCGCGCTCGACCTCTCCGCCAACTCGCTCAGCGCGCCCTCCCGCGCGCGTGG  
GCGCGCTCGCCCGCTCGAGTTCC

>SsLRR-RLK136

TGTGCTAGTGGAAGTTGACGTGGACACTTTGCATGGTGAGATAATTGCATGTGCTAGTGGATGCTAAAGAGATAGATTGGC  
AGTAGGGTTTGAAAATATAAGATATAGATATAGATATAGATATAGATATAGATATAGACAATGTTAGCCTAAACGTTA  
AACGGTGAACAGTCGGTCACCCATCGTTTAGCAAAAAGTCGGTATACACGGCCGTTTAAACGGCTTTTAAACGGTCGAAA  
CGGTTTTGCTAGGCTTTACACGGCTAATCGGCCCTACACGGTTACCATCGAGTAGCGTTTACACGCCATGTAACCGGCTACA  
CGGCCGTGTAGGCGAACAGTGGATATAGATATATATAGATATAGATATAGATATGGTGTGCTTTATATAGGTTAAGCACTTTCACTG  
TTAATAGTATTGTTGCCTTAAATTGCCATATGGAATTAACATGCTCTTATTTGTCTCCATAAAAAAGTATAAGACTTTTTTAAGTA  
AACAATGCTATCGTGAACACCATACTAATTTAGTTCCCCCTTAAAGAAATATAAGCTTTTGGTATGATTAAAGCATACA  
ATAGACATATAATTATTAGCAATATGCATCTATACACTTAGATAAATATATAACAGTTTTCGTGTCCCTGTAAAGGCCACTTA  
AAAAGTTATTCTATCATTTCTACCATTTGAGAAAGAGAAAAATAGCAAAATTTATCTTTGCGTCTAGTAATACAAAAAATATG  
TGCATCATAACACTTCGATTATACTGGTGGTAGATGACCGGAACATATCAGAACGTGGCAAAAGTCAATAGTATCGCCATATGC  
CTCAATGCTATTGAACATGGTCTTCTATGGCTGTGCCCTGACCGCTCTATAGAGTTACAACCTTTGGGTGATAGCTCAIT  
ATCTTCTATGGCAATGAGAAATAAGATTTGTGCTCATGTCCCTTTGACGGTGGGCCACATAACACCATATATAACTCAAACTT  
CATCTAATCATATGGGCCCTAGAGTCGGTCACAAGACTTGACCCATCTACTAACAAATGAGCCCATGACCCAAACAAACGGTT  
TGGTCCCTTGTCCCTCCCGCGCACCATCAAGTTTGTCTGATTACGAGACCCATAACCTAAATAATCGGTTCACTCTCTTCT  
TCTCTGCGATCTTAATTTGCTCGAGTTATGGCCATATGCTTACTACTACAAGCATCGTCTCGTGGCTGCGACCTGTG  
ATACCTCTATAGAGTTATGACTTGGGGTGACAAAGCTCGTTACCTTTTATGGCAATGAGAGATAAGAGTTGTGCTCATGTCCC  
TTTGACTGTGGCAATGTATTGTCAATATGACTCAAAACCTCATCTACCCGTGGGGATCTAGAGTCAGACACAAGACTTGGC  
CCATCGACCAACAAATGAGGCCACGGCCAGATAAACCGTTGCGCCCTTCTTCTCCCGCTCATTTCAACCTCTCTCTATT  
CATGGTAAGCCACGGTCCAATAAACGGTTATCTCCCTTCTTCTCCCGCTCCATTCAAACCTTGCACGAGTCATGACGAG  
CCCACGGCCCAAATAATCGGTTTGGTCTCTTCTTCTCCCGCTCCATCCAACCTTGCTCGATTGATGGCGCAACCATTTGGA  
AAAAAAGCAGAAGAGGAAGAATGGGATATTCATAGCAGAACCAAAGCATGCTAACTTTTCTCTATCCAGTCATCTGTCTAC  
TGATCATCAAATTATATTAGATGCCCGCTATAGTAACATACTAACATACTATCAAAGTATCAAGTATCAACACTTGTCTCTTAG  
CTCTAACCTTAGAAGCAATGTGCTATCGGTGTACAACAATGGTGTTCACCTAGCATCTCTTCTTGGTAGTACTGTAGTACCATA  
ATTTTGGACCCAAATGCACCGAGCACAAGACCGCTTCGTATCTCTGCGCGCTGCGTCCAACCACTTTCCGCTTTCTCT

>SsLRR-RLK391

ACGTTTACTTCCATGTATATGTCTAAATATTCGATGTGATGGGTGAAGACAAAAATTTTGAACCTAAACAGGCCTTAC  
TTTGACTCGCTTTCAATTCCTGCATTTGTGTGACGAAATCTGGTTACGCTTTCTACCTGGAACAGTGATCACCAGTTTAT  
CTAGCTAGGACAACCTGGAAGTCGCTTTTCAAGATTAAGAGGATCCTTTGTAGCTGAGCCAAGACTCAAGAGCACCACCT  
CTTTGACCCGCGACCTGGAGACTGCAAAATGGAACCCAAAGGTCGATTGCAAGTAGCACACAAAAAGAAATTTGACATTTGCAC  
ATGAAACCCGGGAGAATCTTGAATTTCAAAATGTTCTTACTTGCTCGTTCTGTTGGTCTAAGAAAACTACTTCTCTTTCATA  
AATGGAGAACATCACAAGCTTTAAAAAATACTCGACCAATCTAAACATGCAGGTGCTACTAAAGCACTTGCAACCTT  
AGGCTACAAGCTTTTGGCCATCACAAGCTTTTCACTCGCAATGGCTTACATTTTATGATTAGTACTAGTACTATGATAT  
ATATGATTCAATAAAGTTGTCTTGAATTTGTGTACATTGTGGCATAGGAATCTCACAGAAACATTGAGGGGCCAGGATGAATA  
TATAAATATAACCATTTTAAAACTGTCACTGTATTCTCATTTCACTTAGAACGGCAACCTCCATTCCATGCCCTTCTCATGT  
GCTAGTTTTTTTCTGTTTGTAGTGTGAAGTTCAAAGCTCCTTTTAAATGATCTGTTCTCTTTTGAACGAAGTCAGCAGGGGAA

ACGTAATTTGTATCTGCACATC IAGACTCGGATGGTATGTAATCGGGACACAAGGTTTTATACTGGTTCGAGCAAAAATGTCC  
CTATGTCCAGTGGATTACTGCTGCTGTGTGTTGCCTTACACCGGAAGTGCTCGTAGTAGGGGTTATAAGCTTGAGAGAGAGA  
GAGAGCGGATCCCCAAGTCTCTTTGGTGATGTGTGAGTGTGAGTCTTGATCAGAGAGAGGTGGATTATCCAGCAGGGGTCTGTTT  
GGATCGGGGTGTCCCTCTAGACGTGGCCCTGTCTCCCTTTTATAGTTTCAAGGGGAGGGTTCGGGTTACATTGTGTGATAA  
AAAGACGAAATGAGGAAAAGACAAAAGAGAAAAACAAAAGGTGGCTCGGGTGCGGCTGTCTTCTCCTTATTCGGCGT  
GAGCAGTTTACCCTGTAGCCAGAGACGTAATGAGCGTCGAGCTTTTGGCCTCTCCGTTCCGTTAGTGAAATTGTCTGTGGCCA  
TGCTTCGTCTATGTGCTTCTGTACCATCAGAGTAGGGCGGCACGTTGCCCGAATTTCCGTAGAGAGGGAGGTAGGTAGTAT  
AATTGTCGTAACCTCTGTTATTGTAGAGCATGATGCTGTTGTGTGGAATGACCGGAGTCATGACAGATCAACACCGCGT  
CCCATGCTCCCGTTCACTGTGCATGGTCAATGACAGTCCCATCATTGGGAATGAGTGCCGTGGTGGGGGCCCATGTGGCTCGT  
GGCTTGCAGAGGGGGCTTACAGTCCTCTCGGGCGAGACGGAATGCTCCAAGGGGGCGGGCGCTCCCGTACTTACGTT  
CAGGGGTCTGGGCGAGGCGGAGATCATTCGGGTGCAAGGGTCGGACGCTTTAATGACGTCATAAGGGCTTGGCGAGGCG  
GAAATCAGCCCTAAGCCACGGGCGACTTAAACGCTGACACGCTTTAATGCCCTTGGTTGAGATGCTTAATATCGGTACCCG

ACAACCTTTGATTTTTTTGGTACATTAAACCTGCTATGTATCTAGATATACGTTATGTCTATATCTAGATATATAGTAAATTCGATGT  
ACCAAAAAAAGTTAAAAACGGCTTATAATTTGGAATGAAGGGAGTATATTGGTATAGGATAAGCTTTGTGTTTAGCTATAAGATG  
ACCAGAACCGTTCGTTTTCAAAAAGAAAAAGATTGACCAAGACAGATGGTTCATACAAACATAAAGAGATTAGTCTGTTCTT  
ACTCTGATCGTGGGCCCCGCTTTAATGTATATTTGTCGCCACTAGGTGACATATGTATATGCGCCAGAACAGCAAGCTTTGCTC  
ATCTAATAATAAATTAATAATTAATATAAGACGAATTGACCAGTCCAGAACCCTTACAACCTTTTGTGATTAATAAAGGTTAC  
CAACAGGGCTGCTCACTAACTAATACATCCAGTGATAGATTAGAAAAACAGTAATAAATCTTAGAAAAAGCATCAAGGGCAG  
GCTTCATCCATCGCTAAAAACGTACTCCGTACGTCTGACTTCGATAGATAGGATCAGACTACTAGCCCCATTGGTCTTGTTCGCT  
GAAATTCCTGGCCTATGGATGCGAGACGCAGTTCCTACTACTAAGACAATTTTCGTGAAATTGCTTGAGTATTCTTTG  
GCACCCAAACGCGCCGAATCCCGGATTAAAAATGCCGCCAGTGTGAAGCGAAATTCAAAAACCCACGTCGTCTGTGTGAA  
CTTGCGCCGCGCAGGCCACACGGCCACAGTGTGCGAACGCGACGCGAATGGACCGTGGACGCGTCCCCGACCCAACCCG  
CAGCCGACAGGATCCCGCCGCGGCCACGCGCCACACGTGTGACAGGCACAGCACCCCTCGCCCCGGTGTGTACCCGTGTG  
AACGGATCCCCAACCGCACTACTGATTGCCGAACCAACCCCTCCGCTGGACTCGCCCCACAAAAGGCAGGCGGCGCGGGC  
GCGGCTGCCTAAAAAACGGCCTCG

>SsLRR-RLK340

CTATACTCTATAGTGGCGGGCCCCACTAGCTAAATAAAGAGAAAAATGCTATAAECTCAAAACCAAAAATCCAAATTAATTT  
TGATTGCACCATTAATTCGTCTCAATAAATCCTTCAAAACTAGATCACACATGGATATATTTAGATAAAGTGACAAGTGGGTCT  
CCACAGTGGATAGATGATGATATAGAGGATGATGGGTGCGGGAGAAATTGAGTATAGAGAGAATTGATCTTACT  
GACTAGGACATATAGAAGATGAATATAGAGGTCCATAAGTGGGATAGTCTTAACCTAAGACGATTTTCGTGAAATTGCTTGAG  
TATTTCTTTGGCACCCAACGCCCCCAAATCTCCGATTTAAATGCCGCCAGTCTGAAGCGAAATTCAAAAACCCACGTCGCC  
CTGTGTGAACCTTGCGCCGCGCAGGCCACACGGCCACAGTGTGCGAACGCGACGCAATGGACCGTGGACGCGTCCCCGA  
CCCAACCCGCGCAGCGATCCCGGATCCCGCGCGGCCAGCGCCACAGTGTGCGAACGCGACGCGCCACACGTGTGACAGGCACAGCACCCCTCGCCC  
CCGGTATGTACCCGTGTGAACGGATCCCCAACCGCACTACTGATTGCCGCAACCACCACTCCGCTGTACTCGCCCCACAAA  
AGGCAGGCGCGCGGGCGGGCTGCCTAAAAAAGGGCCTCGCTCCTGCCTCCGCCAAACAGTCCACCGCGCTGCCGGTG  
CTCTCTCTCTTCTGCTCGGCCATGGATGCTTCTAGTGGCTACTAGCGAAAACTAGAGCAGCCCTGCGCGGCGTCCCATTTT  
CCCAGGATCCTCTCTCTCGCCCGCGGGCGGGCACCGAGTGGCGTCTCCGGTAAGCGCGCTCTCGCTCGCTTCGCCCC  
TGTAATCAGTTCGCCGATCGAGCAGTTGCCGACTGTAGTTCCTGGTGTGTGCTGCTGTTGTTGTTGTTGAACCCGAGGAACCG  
CCGCTCCTTCATTTCGTTTCGTTCTCTGCTGTCTGTGTCATCGCATCTGCTTGGTAGTTTCTCCGGTTCCTGCTGGCAGC  
CGGGCTCTCGAATTTAGAGAGTGTGTTTCAGGAACGAAAGCGAATTCGATGGCTGTTCAATCGTAGCCCATGAAATGAGC  
TTTCTGGGTGCCGATTTCCCTGAGGAATCCTTCTGCTGTGCTAGGAAGCTTCTTAATTATTGTGCTCTGCCGTGGCGTAG  
TAGTGCAGAGGATCTCTCCCTGCAATTGCAATCGAGGCGCCCATTTTCTTTTGTGTTTCTAAAGAGAAAGAAATTGAGGTGC  
TCATCATCAGCCCATGTGGTGGTGCCCAACTGCCCATTTGTTTTAGAAATGGGAAATGCTTCTGTGTCGAGATCGGATCCC  
ATCCCATCTCGTTGATTAGTATGGCTTATGTTAAACAGTAAGAAAAAGGCCCGTCATAAACTCAATTTCTGCCCTTTTAGG  
AAAATGCGAGACTCCGCTCTCTCTGCTTCATTTGCAAGTGGCTTCGGAAACCATCCAGCGTCCGAGTATAATTAATAATTAAGT  
TTAGCATTTGGGTTTTGGTTTTGCCATATTTGCATTTTGCTTCTCACAGTATGATCATCGAAACTACCGGTAGGTGTGCGTAG  
CAGTTTGGGGGGCTCTAGTTAACCAAAACCCGTTTATGAGTATATTTCTTGTCTATATACTATATTAATGATGTTTTTACATGAG  
TACGTTCTACTTGGTGTTAGTATGTGTCACAGGACAGTAGGCGGGGCTTCTTCAAGATTGATAAATGATAATGTTACAAAAG  
GATTTCTACCATCTTTTATTGGGAAAAATAAGTAACCTGTAGTTTCATCAAATTTGTTCTACAACGTTGCTTTTAGGGGGGAAG  
GTTACCAACGTGCACAATTTGATGATGACAACCGTTCATACATGCAATCCCCATTGATTGTGCGTTGAACACTTGTACATA  
GGACAGAAAAAATGATC

>SsLRR-RLK322

ACATCACTAGTAGTCTCTGCTGTGAGATTATTAACCCCATTTCTCTTTTGCCTACGTGGACAATAATTCTGAGTGAAGCCAAAC  
GACCTTGGAGAAATGGGGCACACTCATACCTGTGTAGTATGCTCACGGCGACACGCGCGCACGCTGCTGTGTGACCAA  
CTTTTCAGTAGCTGAGCCGCGATCACACGTGAACCTGTGGGGACTGGGGACTGGAGGGTTTCAGACCTCATTTTCAACCATG  
ACTCGAGAAATTCATCAGTGTGCACGGGCACGACTATACGCGTACAGGCAAAAAAACTTGCTTGATGGTGGTCAAGTCATGT  
CTTCGACTCTGAGGAAAAAGACAAACGGATATGCTCAGTCTGCTGACGGCAACAAAAAAGCAACTGACGATGTGC  
ACGGACCGGGCGCACGCTGTCCGGACGGCAATGATATGATCACGCGCGTGAAAAACCTTACGAGTTGCGACAAAAAGCAGC  
GACGATCCATACTGTACTAGCGTATGCATACAGATGTTCTTTAGCTCTTACCAACAACCTGTCTCTAGTGCCTTAGGTCCGTTGG  
CACTTAATAGAGGCTTTGATGGAAAAAGAAAAATCTGTGATAGCCTTTTAAATTAGTCAGATCTTTAAATATACTCTCCGTTT  
CAAATATAAATCGCTTTGACTTTTTTATTCATCCATTTTACTATGTATCTAGATATATACATATCAAAATAGATATCAAAAA  
GTCAAAACGACTTATAATTTGAATGAATAGAGTACTATGCTTTATTTTAGATTTCTTGCTGGCTAAAGATAGAGAGCAGGACT  
AGCTCTCTATACATGATACGATATTTGAGGATGAAAATATATAAAAAATAGTTTATTCAAATAATATAAAAGATGATTTAGAGA  
TTATGTTAAAGAAATACACTGAAAATGCTCTAAGCCATCTGATACACTCCATCTGTTCCAAATTATAAGTCACTTTGATTTTT  
GGTACATTTAACTTGCTATGTATCTACATATACGTTATGTCTAAATATATAGCAAAAGTGGATGTACCAAAAAAGTGAAAAATGGC  
TTATAATTTGGAATGAAGGGAGTATAATAGTATAGGATAAGCTTGTGTTAGTTATAAGATGACCAGAACGTCGTTTCAAAAA  
GAAAAAGATTGACCAAGACAGATGGTTCCATACAACATAAAGAGTTGATCGTTTTCTCTTACTCTGATTGTGGGCCCCGCT  
TAAATGATATTGTCTCCGTGAGGTGACATATGTATATGCGCCGGAACAGCAAGCTTTGCTCATCTAATAATAAACTAATAATT  
AAATATAAGACGAATTGACCTGTGCAGAACCGTTGCAACTTTTGTGATTAATAAAGAGCTTACCAACAGGGCTGCTGACTA  
ACTAATACATCCAGTGATAGATTAGAAAAACAATAAACTCTTAGAAAAGCATCAAGGGCAGGCTTCATCCATCGCTAAAA  
CGTACTCCGTAGGTTTGACTTCGGTAGATAGGATCAGACTACTAGCCCATTTGGTTCTTGTTTCGTGAAATTCCTGGCCTATGG  
ATGCAGAGACGCAAGTTCCTACTACTAACTAAGACAATTTTCGTGAAATGCTTGAGTATTCTTTGGCACCCAACGCCCCCAA  
ATCCCCGATTTAAATGCGGCCAGTCTGAAGCGAAATTCAAAAACCCACGCGTCCGTGTGTAACCTTGCGCCGCGCAGGCC  
ACACGCGCCACAGTGTGCGAACGCGACGCAATGGACCGTGGACGCGTCCCCGACCCAACCCGACGCCGACGGATCCCG  
CCGCGGCCACGCGCCACACGTGTGACAGGCACAGCACCTCGCCCCCGGTGTGTACCCGTGTGAACGGATCCCCAACCCG  
CCTACTGATTGCCGCAACCACCTCCTCCGCTGGACTCGCTCCACAAAAGGCAGGCGGCGGGCGCGGCTGCCTAAAAA  
AACGGCCTCGCTCCTG

>SsLRR-RLK306

CTCATTCATTGTGGTCTCAGATGGAGGGCGGCAGCGAGCGCGTAGCTACGAGGAGTGGTGCAGGGCACAAATGGTCA  
CGGCGTAACAGCGAGTATGCTGTTGCGGCGGTGGCGCAAAATCGACGATCGATTGGTGTCTTCGGCTTGTGTTTAGGCTTATC  
TTTGAGTCTCGTGTGGTCTTCTTGTGTTTTCTTTAAGTGTGTTGTTGTTGTAATCTCTCCCTCCCTCTTTGTACATCTCTGG  
TCTTATTGTAATTGGATTGACGCCATGCCCTTCCACCTGGCTTGTGCTCGGCATCTATAAAATAAAAAATTAGGTGGAGATG  
TTCATCCCCGATGACCTTTCCAAAAAAGCTCAAAATAGGTGACTTGTGTGTGTAACCTTTGTGAAGTGAAGGATGTGCCAAAC  
GCACACGCGAGCGAAGCCAAGTCATGCACGGGCCGTAGTGGGCTAGTTTGCCACTTGGGGCCGATTGATGGTGTATCAT  
ATGACTCGGTCCACCTTCTCTGTTGCTGCTGCTCCGATCATTCCTGTTCTGTTCTAACACTGGTTTCGACCCGGAGTTGGATT  
AGTTATTTGAATTAGAACAACACCAACAACGCAAAATAAAGAAATCTCAGATGCGTTAGTTATTTGAGCACATGACGATGCA  
GTCTGCCAGGGGATCATGCATAGAAGAAGCACTTGCAGCACGGTTTCTGTCTATCTAGAAAGCATGCATCAAAAACTTTTCA  
GAAAAAGAAAGCCAGAAACAACAACTCTCACTCTCAACAAATCTGTGTTAGGCCCGGCATGCCAGTACTGCTAGTAGGC  
CCATTTGAGCAGTACCCCTCTTCACAAACCCCAACCCGCAACCAACCAATTTGCTTGCCTGTGACCCGTGTGAACGGATCCCCAACCCG  
GTGCACTTGTCTTAAGTGTCTAGTGTGAATAACGACGACGGTGTGATTGATGATTGATGAACCAATCAGCACATGTTTTTG  
GTCATAGGATAGCTTATTAGCCCTTGTGTTTAGTTTTAAAAAATTTCTCAAAAAGTGTACGGTAGCCGTCACATCGAATCTTTGG  
ACGCATGCATGAAGCATTAATATAGGTAAAAAATAACTAATTGTACAATTTGTCTATAAATGTCGAGATGAATCTTTGAGC

>SsLRR-RLK339

>SsLRR-RLK28

>SsLRR-RLK44

ATGATTTTGGGACGAAATTGCTGATAGCCTCGTTGAGCACTAAAAGGAATGAAATTGTGTGAATAATGAGGTTAGTTGATTCC  
GGTTGGTATTCCTGCCTGCCATTGTCTGCAGCAGTGTTGGCTGCTAGCATGATCTCTTTTCAGCACACAAACAAACAAATAT  
GCATTCCTATCTCTGATTTTTGCAATAGGATAAAACCTTAGGCTCAGGAGGACATCAACCCATGTGAGGAGGACACGGGAC  
GGGGGGCATAGCCCAGGTTTCGCCTCCACTGCCCTCCGCCAGTGGTGCGATCGTTTGAGGGAAAAATGAGGTAGGAAAAACCT  
CCATTCGTTCTCAAATTATAAGATTTTTGATTGTTAGATACATGTTTTTACTATGTATGTAGATATAGTGATATCTTTTTTT  
TCGCTAAAGATAGAGTGTATATCTAAGTGTATAGTAAACATGTATGTATAGACAAATCAAAGCGGTGAATGTAGAGACGGA  
GGGGCATGGCTTAATTTGAAGATGAGGGGGTGAAGTGATAGTTCTTGATATTGGGTCAAATTCTAATTCCAAATCTTAATCA  
TCCAAACACCGGCATTGGTGCCTAGCCAATAACAACCTATTTGGACTGTGGAGGATGAATATCTATATCCAAACAGGGTTAT  
AATAACGTGGGTTAAATATGAATTCAGACGTGGTAAAGGTTCAAATTTTCTATTGCCACTTTTAAAGACCAAGGCTCAGC  
CGCTACGTACTACATGCCATGTCACCTTAAAGCCACAATTAGCGAACACTTAATATAATGAACCTGGCTATTAGATTGGCTAT  
AAGGAGTCTTTGAGTGTTATTGTTGTATGTGAATATCAGCTAGGATTCAATAAGCTCTTTATGGCCATTTTAAACATA  
CAAAACATGCTCCTCTGTTCCATCAACACTTATAGGAATGAAAAGAAGCGGATATTTTGATATCCGCTGTCGCCGAAGAGT  
TAAAACCCCTACTTGGATAATTTTATATGGATCAGAACATTTAAACATTTGATCTGATTTGTTACCTGAATACATAAAATTTGATTT  
CTGATACATATATTATACATATATCAATACCTGCTACCCAACACTATTGTATTAACTTTGATATCCCGGAAGGAACAACTAGGCC  
ATATTAGTAGACGCTAATATCCATTTCGATTTCGATCCATTTTATCCCTTAAACATGTACCAAAACAAAGAAATATTAGAGCA  
CTATAATAGATTAGCTTGAAGCAGCAATTTTATCTTAATACCTAGATACAAACATAACAATTTGCCGAGGCTTGAAGAGAG

TGGATACAGATTATATAGCAGAAATGGTATTTTGCTACGGCATTACATCAAACACTTGGCCAGCATCATCAGTCATGCGCCTCC  
TTGCACATCGGGCTATAGAGAATTCCTAAGCATCCGCGAGACGGACAGCTACCTTGCCCTGCCACGGGGCTCGCCGCCGCTCT  
GCTCAACGTAGCGACGCCGGACCTGAGTGTGGCCGCGCCAGCACCCAGGTCAAGCCGGGGCATGGCTCGCCACGCCGCCAC  
CTAGGCCGGTCAGAGCGTCGCTCCAAGACCGCCCGCCGCGCAACCCCGCAAGCAGTGCAGCGTGATAGCTCCAATGGCAC  
CCACCACGCCGTCTACATCATCTTCCATCCGCACCCAGACCGGATTGCCCCGCCGCTCATCAAATCACGCAAAATTTGCTG  
TGCGCCGCCACCTGTCTCGGTGGCCACGACCGCACACCAACGGCTTCCTTTTCAGCCGCACCGATCCGGCGGGGGCCATTT  
CCACTTCCATTCCCTGATGCTGCCGCCACTAGCCCCACGGGCCACAACCCGACGCCGCCATGGCCAGCCATCTCTGTCTGTTT  
CCGTTCTCCCTTCAAAGCGCCGCACGCGGCACGCCCAAGAAAACAGCAGCGGCCTCTCTCTCAAGGCTCAAGGTTCA  
AGGCAGC

>SsLRR-RLK38

TTTTATTTTATAATTTTATGAGTGACGAGTGGTTGGGCAGCCTCGGTAGCACCTTGGTGTCCCAGGTTCGAACCCCCACAGG  
GCCAATCGCAGGTGGAGGTAAAAAAACCCTCTTCTGTCCCACGTGTCCAAAGCACACATGTAAGGACGGGCTCAGTTCA  
TATGAGTGTGGTGTGTCATTGTAAGGACAAGGCTAGAGGTTTCGAGACTTTTCTCGGTCTACGTGAAAGGCTTTTCTACTTTA  
AACACCATGCTCGGGAGCCGGCTTCTCCTGTAGGCCGAGTCTTTTATAAGGCCCTGTTTAGCTAGGGAGAAGAAAAATTT  
TGGATGTCACATCGGATGTGTGCGAAGGATGTGCGGAGGGGTTTTCGGATACTAATAAAAAACAATTAACAGAACCTGTCA  
GAAAATTGCGAGACGAATCTAATAATATTAATTAATCTGTCTATTAGCATATGATGGTTATTGTAGCACTTAAGGCTTTTCTATGG  
ACTAATTTGGCTTAAAAGATTGCTCTCGCGATTTCCTCAAGAACTGTGCAATTAATTTTTTTTGTCTATATTTAGTACTCCATG  
CATGTATCAAACATGCCCTTTTACTATAGAAGGCAAAAAAAATTTGAAAACTAAACAGGCGAGCGAGGTGTATAGAAATG  
AGACAAACCTTTTACCACAAACGAGCTAGGTTATGCAACACCCACACACCGGATGCTCCCTCTCTTTCACGGGAGGAAGAA  
TCTCTCGCTTTCTCGCTCCCAACTGGGTATGTCTTTTCGGTCAGCATGCCATACACGTACATGCGCCCTGATTAATCAATCG  
ATCCATTTAGCTACGAGAAAAGAAAGGTGTGGGGAAGGAAAAAGGCAGAGAAAAGCGGTGCGAGGAGCAGAAAAACGGGGG  
TGATTAGCTGTTCTGTCCTCGTTCCTCCTCGCCACCACCGCACGCGGACAAAACCGCCCTCTCACGGCCTCGCCA  
GTCGCCACACTCCCAGCCCCCTTCGCTCGCGCACACGGCACACCACAGTCCAATTCCCAGTACACTGCTCTACGCCTAATC  
TCTCCAGCCCTTTCGCCCCCTTGCCCTTGCCACGCCGCCACCGCTGCCGCATCATCCGCCCGTTGCCGGCCGACGTGCGCTG  
GCCCCGGGCTTCCGCCCCATTTCGCCGCCGAGCCCCGTCCAGATCGCCCGGGCGCTTCCTGCCAGCGTCGGCGCGGGCGCA  
GGTATCCCGTCCCTCGCGCCGATCTGCCCTCCGTTTCTGCTGATTGCGCTGCCCTTTGGTGTGTGGCCGTGGTAAATGCGAACG  
CGTTAGGCTGCCGCCGCCCCCAATTTGCTGCGCTTAATTCGTGCGTCGGTGGCGTCGCCTGTAGATGAGCCGTGCTTGCAG  
ACTGCAGTGGCTTTGACTCTGGATGCATGCTCGTGTCTGGTAGTGCCTACTGTTAGCTGGGGTGTTTTGCTGCTTCTTTGG  
AAGTTACTAATACTAAAGGAGAGGAGGCATTGGATTGCTGGGAGCTGGAACCTAAGTGGCCGTGGATTAAAGCCGGGTAGTG  
ACAAGCTCATAGCCCTCCACGTGTTTCTCTTCGAGTTTCGAACTAGAGGCTTTGTGGTTCTCCCCAGTTGTTATCCCTTTGA  
AGGTTTGTGCTCTGAAGCAATTATCCAGAGGCAAAATTAGGAAAGTTTGCATCACATAGAAGAAAGAAAACATTTCTAATTT  
CCCCTGTATGACCGTCGATGTGTGCTGCATTTGATCTGCTGTGTGTTTTTTGTGATCATATCATGATTTATTTGCTGAAGCGCT  
TTTGGTTATGCTTTTGCCTTGTTAACTTTATTTGTATGACTGTTCTGCTCCAGGGTTGGAAATCTATTTGACCACTCAGTGGG  
TGGCTTCATGTTAAATCCATTTCTGGTTTGAAGATGCTTCATCAATGACATCTGGAAAGTGAATAGTATGTCTGATCTTCTA  
TGCTGCACCAAGCTGCTTATC
