# Supplementary figures and images for: Genome-Wide Identification of LRR-RLK Family in Saccharum and Expression Analysis in Response to Biotic and Abiotic Stress
Source: MDPI journal article supplement (doi:10.3390/cimb43030116), 2021-10-18

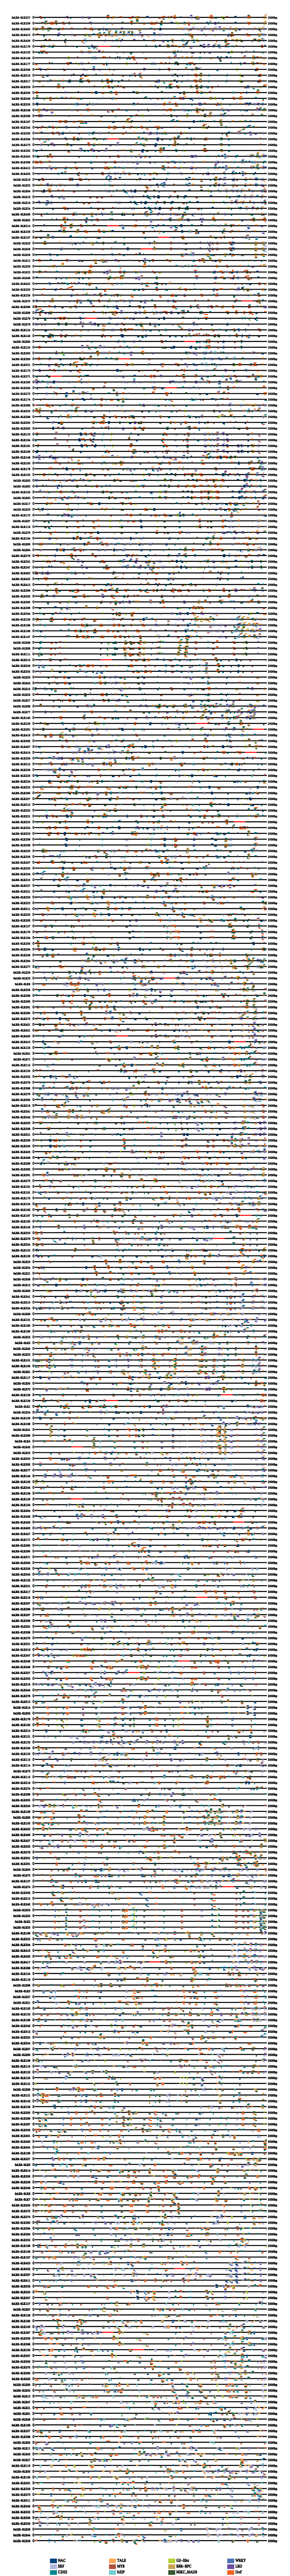

Supplement: s1 [file s1]

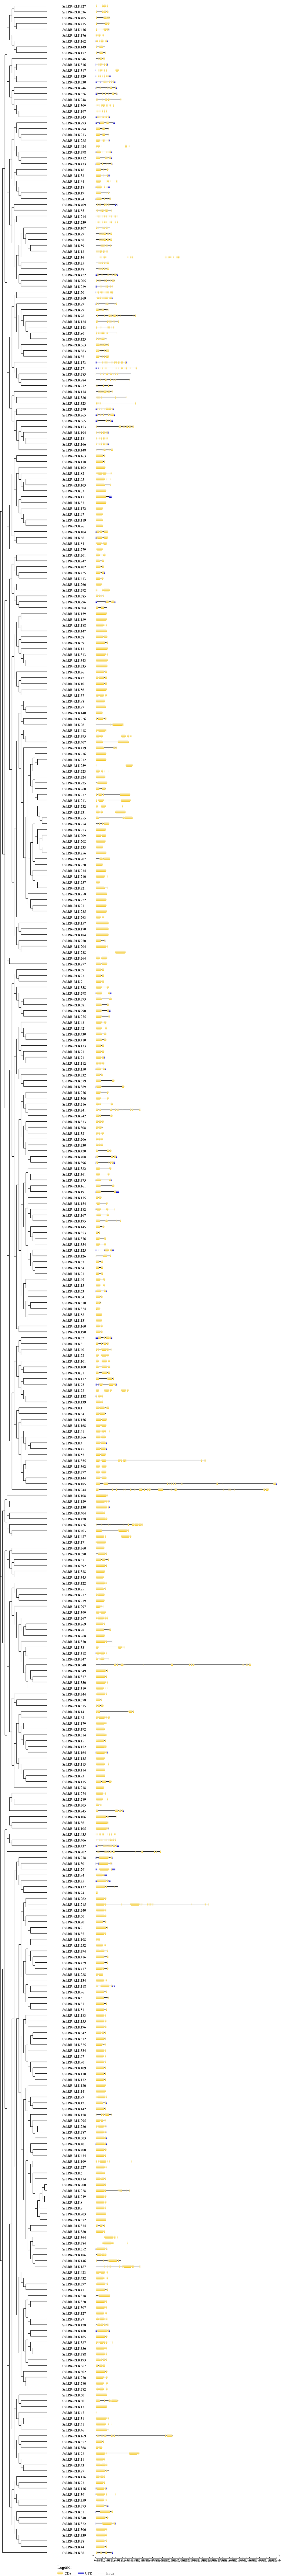

Supplement: s1 [file s1]
